# Supplementary material for: Uncovering full-length transcript isoforms of sugarcane cultivar Khon Kaen 3 using single-molecule long-read sequencing
Source: PeerJ. 2018 Oct 30;6:e5818. doi: 10.7717/peerj.5818 (PMC6214230; doi:10.7717/peerj.5818)
Supplement: Table S2 — The details of 5,026 PacBio transcripts which do not match with sugarcane sequences available in public databases are shown including sequence length, predicted ORF length, BLAST results against protein databases, the presence of protein domain(s), similarity with known long-noncoding RNA, gene expression level, and RepeatMasker analysis. 569 transcripts which do not match with protein databases are highlighted in green. [file peerj-06-5818-s002.xlsx]

## Sheet: list
PacBio transcript ID	Sequence length	Hit Hoang et al.	Hit plant/nr protein	ORF type	ORF length	Number of detected protein domains /signatures	Detected IPR protein domain	Hit IncRNA	Repeat sequences	Expression level (RPKM)
c5660/f1p0/2269	2297	1	N/A	5prime_partial	300	1	-	N/A	(GGC)n,GA-rich	0.0993517
c24880/f1p0/3232	3202	1	N/A	complete	300	N/A	N/A	N/A	(T)n	0.018863
c8221/f1p0/3544	3535	N/A	N/A	5prime_partial	300	1	-	N/A	(T)n	0
c37577/f1p0/1138	1134	1	N/A	5prime_partial	300	N/A	N/A	CNT0020617	none	1.84638
c20341/f1p0/3856	3857	N/A	N/A	complete	300	1	-	N/A	none	0
c25753/f1p0/1354	1366	N/A	N/A	complete	303	N/A	N/A	N/A	(C)n	2.9182
c28525/f1p0/1205	1203	1	N/A	complete	303	N/A	N/A	CNT0027114	(GCGCC)n,(TCCCCG)n,DNA-12N_SBi	0.585738
c4705/f1p0/2190	2173	1	N/A	complete	303	N/A	N/A	N/A	(T)n,Gypsy-125N_SBi-LTR	0.0919576
c4673/f1p0/14409	14385	1	N/A	complete	306	1	-	N/A	(ACA)n	0
c25395/f1p0/3248	3248	N/A	N/A	complete	306	N/A	N/A	N/A	(CAG)n,(CCCT)n	0
c19257/f1p0/2174	2169	1	N/A	5prime_partial	306	N/A	N/A	N/A	(CCG)n	0
c24124/f1p1/2467	2466	N/A	N/A	5prime_partial	306	1	-	N/A	(CCTCCCT)n	0.484457
c15447/f1p0/1384	1381	N/A	N/A	3prime_partial	306	N/A	N/A	N/A	(G)n	0.0587688
c10315/f1p0/3286	3406	N/A	N/A	complete	306	N/A	N/A	CNT0031889	(GTGGCG)n	0.260841
c18725/f1p0/2777	2777	N/A	N/A	complete	306	N/A	N/A	N/A	(T)n	0
c7755/f1p0/2112	2090	1	N/A	complete	306	1	-	N/A	(TCCC)n	0.0107495
c26143/f1p0/1391	1391	N/A	N/A	5prime_partial	306	N/A	N/A	N/A	none	0.274997
c30023/f1p0/2687	2688	N/A	N/A	complete	306	N/A	N/A	N/A	none	0
c28267/f1p0/1067	1067	N/A	N/A	complete	309	1	-	N/A	(CGCCGG)n,(GCCGTC)n,(C)n	0
c10769/f1p0/5397	5173	1	N/A	complete	309	2	-	N/A	(TCTT)n,(T)n,(TT)n,Gypsy-125N_SBi-LTR	0.208212
c3937/f1p0/4589	4584	N/A	N/A	complete	312	N/A	N/A	N/A	(A)n	0
c33061/f1p0/9496	9480	N/A	N/A	complete	312	1	-	N/A	(T)n	0
c35090/f1p1/2380	2390	1	N/A	complete	312	1	-	CNT0028316	GA-rich,(TCC)n,(TC)n	0.353795
c16367/f1p0/5957	5867	1	N/A	complete	312	1	-	N/A	STOWAWAY13_SB	0
c8461/f1p0/1683	1683	N/A	N/A	complete	312	1	-	N/A	none	0
c25282/f1p0/3778	3740	1	N/A	complete	312	N/A	N/A	N/A	none	0.130331
c22252/f1p0/3303	3303	N/A	N/A	complete	315	N/A	N/A	N/A	(CGTGAG)n,(GTCCCA)n,(GACCGC)n	0
c14411/f1p0/7015	7003	N/A	N/A	complete	315	N/A	N/A	N/A	(T)n,(CGGTG)n	0
c30611/f1p0/1307	1306	N/A	N/A	complete	315	1	-	N/A	none	1.32573
c29753/f1p0/4427	4391	1	N/A	complete	315	N/A	N/A	N/A	none	0
c24325/f1p0/2371	2371	N/A	N/A	complete	315	N/A	N/A	N/A	none	0
c8303/f1p0/2732	2535	1	N/A	complete	318	N/A	N/A	CNT0019595	(TGTTT)n,Helitron-N11_SBi,(A)n	0.266525
c28624/f1p0/3880	3860	N/A	N/A	complete	318	N/A	N/A	N/A	Helitron-N2_SBi	0.235719
c9143/f1p0/4448	4446	1	N/A	complete	321	N/A	N/A	N/A	(A)n,(CGGCG)n,(TTTTTTG)n	0
c12244/f1p0/1712	1717	N/A	N/A	complete	321	1	-	CNT0018523	(CCT)n,(GCGGC)n,(CGGCGCA)n,(TC)n	0.345614
c22072/f1p0/5003	4891	1	N/A	complete	321	N/A	N/A	N/A	(TTGT)n	0.0415642
c30961/f1p0/1635	1636	N/A	N/A	complete	321	N/A	N/A	N/A	GA-rich	0.114237
c12570/f1p0/1310	1310	1	N/A	complete	321	N/A	N/A	N/A	none	1.56686
c44271/f1p0/2344	2344	N/A	N/A	complete	321	2	-	N/A	none	0
c37587/f1p0/8943	8745	N/A	N/A	complete	324	N/A	N/A	N/A	(T)n	0.0623431
c43863/f1p0/2842	2842	N/A	N/A	3prime_partial	324	N/A	N/A	N/A	(TACA)n	0
c27340/f1p0/5106	5106	N/A	N/A	complete	324	N/A	N/A	N/A	(TT)n	0
c16374/f1p0/3891	3891	N/A	N/A	complete	324	N/A	N/A	N/A	LINE1-9_SBi	0
c23422/f1p0/1575	1576	1	N/A	5prime_partial	324	N/A	N/A	CNT0017758	LTR-2_SBi	0.587628
c33034/f2p0/1187	1187	N/A	N/A	complete	327	N/A	N/A	CNT0021037	(GCC)n,(ATTAATT)n	2.30669
c16385/f1p0/6363	6341	1	N/A	complete	327	N/A	N/A	N/A	(T)n,(ATATA)n,(AATA)n	0
c39617/f1p0/5150	5165	1	N/A	complete	327	N/A	N/A	N/A	(TATGTTT)n	0
c29316/f1p0/1408	1407	1	N/A	5prime_partial	327	2	-	CNT0030437	none	0.12878
c39398/f1p0/2695	2695	N/A	N/A	complete	330	2	-	N/A	(T)n	0
c21969/f1p0/6740	6678	1	N/A	complete	333	2	-	N/A	(A)n,(T)n,(GCCGCG)n	0.0150749
c33848/f1p1/3953	3893	1	N/A	complete	336	1	-	N/A	(TC)n,(AAAAC)n	0.0618106
c6272/f1p0/6679	6650	1	N/A	complete	336	N/A	N/A	N/A	none	0
c8031/f1p0/757	757	1	N/A	5prime_partial	336	1	-	N/A	STOWAWAY1_SB	1.89406
c10840/f1p0/4251	4182	1	N/A	complete	339	N/A	N/A	N/A	Gypsy-92_ZM-I,Helitron-N14_SBi	0.571206
c32408/f1p0/3881	3881	N/A	N/A	complete	339	N/A	N/A	N/A	none	0
c29903/f1p0/1221	1227	N/A	N/A	3prime_partial	342	1	-	N/A	(CTC)n	0.508649
c4057/f1p0/5437	5437	N/A	N/A	complete	342	N/A	N/A	N/A	none	0
c15275/f1p0/2300	2326	N/A	N/A	complete	345	N/A	N/A	N/A	LINE1-6_SBi	0.313991
c24045/f1p0/4622	4586	1	N/A	complete	345	N/A	N/A	N/A	none	0
c17996/f1p1/1090	1089	1	N/A	5prime_partial	345	1	-	N/A	none	3.06309
c25767/f1p0/1367	1368	N/A	N/A	complete	345	3	-;;Yap1 redox domain	N/A	none	0.0294337
c28989/f1p0/1227	1228	N/A	N/A	5prime_partial	348	1	-	N/A	(ACCACA)n	0.0327893
c28391/f1p0/1183	1183	1	N/A	5prime_partial	348	1	-	CNT0021265	(CCCTCCG)n,EnSpm-34_SBi	1.06857
c12440/f1p0/1372	1378	N/A	N/A	complete	348	1	-	N/A	(CTCC)n	0.730846
c43946/f1p0/4312	4310	N/A	N/A	complete	348	N/A	N/A	N/A	(T)n,(TTGTT)n,(TT)n	0
c8470/f1p0/11028	10876	N/A	N/A	complete	348	N/A	N/A	N/A	(TG)n,(TCATATA)n,A-rich,(GCAA)n,GA-rich,(CCCAA)n,(CA)n	0
c38058/f1p0/3222	3222	N/A	N/A	complete	348	N/A	N/A	N/A	none	0.0187455
c36795/f1p0/1739	1767	1	N/A	complete	348	N/A	N/A	N/A	none	1.75238
c31742/f1p0/2432	2433	N/A	N/A	5prime_partial	351	2	-	N/A	(CCT)n,EnSpm-41N2_SBi	0.121614
c39739/f1p0/6064	6066	N/A	N/A	complete	351	N/A	N/A	N/A	(T)n,(GGAG)n,(TTG)n,(GGT)n,(GCG)n	0
c7188/f1p0/7819	7816	1	N/A	complete	351	N/A	N/A	CNT0014501	(TA)n,GA-rich	0
c6010/f1p0/2522	2517	N/A	N/A	complete	351	1	-	CNT0020869	hAT-N18_SB,STOWAWAY12_SB	0.324049
c2875/f1p0/2244	2247	1	N/A	complete	351	3	Ribosomal protein L9/RNase H1, N-terminal;;Ribonuclease H1, N-terminal	CNT0020248	(TCT)n,(ACACCT)n	0.403191
c38488/f1p0/7746	7746	N/A	N/A	complete	354	1	-	N/A	GA-rich,(T)n,(TT)n	0
c13649/f1p0/4016	4016	N/A	N/A	complete	357	1	-	N/A	(GAGATGT)n	0.0250655
c13752/f1p0/5813	5814	1	N/A	complete	357	1	-	CNT0019610	TREP52,RLG_scTat_1_4-LTR,HUCK1-I_ZM,Gypsy-133_SBi-LTR,Gypsy-133_SBi-I	0.242395
c18053/f1p0/3057	3033	1	N/A	complete	357	2	-	N/A	none	0.0140125
c6938/f1p0/5238	5238	N/A	N/A	complete	357	N/A	N/A	N/A	none	0
c38078/f1p1/1356	1352	N/A	N/A	5prime_partial	360	1	-	N/A	none	0.110762
c22550/f1p0/2494	2500	1	N/A	5prime_partial	363	1	-	N/A	(ATTAA)n	0.188438
c34891/f1p0/2679	2679	N/A	N/A	complete	363	1	-	N/A	(CCG)n,G-rich,Helitron2_ZM	0
c25671/f1p0/3510	3510	N/A	N/A	complete	363	N/A	N/A	N/A	(GCCGTC)n	0
c13061/f1p0/7302	7282	N/A	N/A	complete	363	N/A	N/A	N/A	(T)n,(ATTT)n,(TA)n	0
c29765/f1p0/4319	4312	N/A	N/A	complete	366	2	-	N/A	none	0
c12410/f1p0/1465	1463	N/A	N/A	complete	369	2	-	N/A	(GGC)n,EnSpm-14_ZM	0.302747
c3008/f1p0/2441	2441	N/A	N/A	complete	369	N/A	N/A	N/A	GA-rich	0
c4517/f1p0/3604	3690	1	N/A	complete	369	N/A	N/A	CNT0020299	STOWAWAY13_SB,STOWAWAY12_SB	0.235517
c21581/f1p0/4392	4391	N/A	N/A	complete	369	1	-	N/A	none	0
c6329/f1p0/1236	1234	N/A	N/A	complete	369	N/A	N/A	N/A	none	0.261039
c42966/f1p0/2288	2288	1	N/A	complete	372	N/A	N/A	N/A	(ATTCTAA)n,EnSpm1_SB	0.233015
c36338/f1p0/1353	1353	N/A	N/A	complete	372	1	-	N/A	none	0.01488
c31879/f1p0/7252	7251	N/A	N/A	complete	372	N/A	N/A	N/A	none	0
c18302/f2p1/3486	3489	N/A	N/A	complete	375	N/A	N/A	CNT0031889	(A)n,(GTGGCG)n	1.38912
c5957/f1p0/3833	3754	1	N/A	5prime_partial	375	2	-	CNT0025391	(CTCCGC)n	0.124248
c17004/f1p0/1546	1545	N/A	N/A	complete	375	2	-	N/A	Gypsy-125N_SBi-LTR	0.482141
c26017/f1p0/5489	5484	1	N/A	complete	375	1	-	N/A	none	0
c24345/f1p0/2393	2386	N/A	N/A	5prime_partial	378	N/A	N/A	N/A	Helitron-N13_SBi,(TG)n	0.0843782
c39308/f1p1/2608	2452	N/A	N/A	5prime_partial	378	1	-	CNT0020156	Helitron-1_SBi	0.378757
c16519/f1p0/2297	2297	N/A	N/A	complete	378	N/A	N/A	N/A	none	0
c11470/f1p0/2675	2659	1	N/A	complete	381	N/A	N/A	N/A	(CGCGCGC)n	0
c30900/f1p0/1410	1411	1	N/A	5prime_partial	381	2	-	N/A	none	2.74215
c9058/f1p0/1261	1261	N/A	N/A	5prime_partial	381	1	-	N/A	none	0.0638625
c17271/f1p0/1351	1351	N/A	N/A	complete	381	1	-	N/A	none	0
c37862/f1p0/4269	4252	1	N/A	complete	384	N/A	N/A	CNT0019036	none	0.0913763
c4627/f1p0/5805	5805	N/A	N/A	complete	387	N/A	N/A	N/A	GA-rich	0
c8932/f1p0/1613	1613	N/A	N/A	complete	390	2	-	N/A	(CCA)n	0
c22736/f1p0/4267	4246	N/A	N/A	complete	390	N/A	N/A	N/A	LINE1-8_SBi	0.0189662
c17806/f1p1/1181	1167	1	N/A	3prime_partial	390	1	-	N/A	none	6.21895
c31417/f1p0/4055	4055	N/A	N/A	complete	390	N/A	N/A	N/A	none	0
c4594/f1p0/2113	2073	N/A	N/A	complete	393	1	-	CNT0017656	none	0.0194237
c34602/f1p0/1541	1542	1	N/A	complete	393	N/A	N/A	N/A	none	2.79612
c27322/f1p0/1707	1708	1	N/A	complete	393	N/A	N/A	N/A	none	0
c36281/f1p0/3996	3996	N/A	N/A	complete	393	N/A	N/A	N/A	none	0
c4358/f1p0/2482	2469	1	N/A	5prime_partial	399	N/A	N/A	CNT0021200	MuDR2_ZM	0.366938
c9397/f1p0/3270	3270	N/A	N/A	complete	399	2	-	N/A	none	0
c15933/f1p0/1046	1045	1	N/A	complete	402	N/A	N/A	N/A	(GCAGCG)n	1.30579
c37976/f1p0/2336	2329	1	N/A	complete	405	N/A	N/A	N/A	none	0.0259365
c39836/f1p0/5545	5545	N/A	N/A	complete	408	1	-	N/A	(TCCTAC)n,(GCCGCA)n,(GCATCCT)n	0
c4082/f1p0/11224	11228	1	N/A	complete	408	1	-	N/A	none	0
c7647/f1p0/5988	5996	N/A	N/A	complete	408	N/A	N/A	N/A	none	0.247719
c34457/f1p2/4213	4212	1	N/A	complete	411	N/A	N/A	GRMZM2G146731_T01	hAT-N20_SBi,(TATT)n	0
c29162/f1p0/2615	2616	1	N/A	5prime_partial	414	1	-	CNT0019519	GA-rich	0.843152
c17041/f1p0/1193	1206	N/A	N/A	5prime_partial	414	1	-	N/A	none	0.333875
c3114/f1p0/2696	2700	N/A	N/A	complete	417	1	-	N/A	ATHILA-6_SBi-I,RLG_scTat_2_1-I,(GAAGA)n	0.726457
c1703/f4p1/3482	3482	N/A	N/A	complete	417	1	-	N/A	ATHILA-6_SBi-I,RLG_scTat_2_1-I,(GAAGA)n	1.23648
c4903/f1p0/3100	3100	N/A	N/A	complete	417	2	-	N/A	none	0.032472
c36485/f1p0/4390	4380	N/A	N/A	complete	420	1	-	N/A	none	0
c36954/f1p0/1420	1420	1	N/A	5prime_partial	426	N/A	N/A	N/A	(GCC)n,DNA-3-3_ZM,EnSpm-22_SBi	0.279878
c13225/f1p0/8114	8121	1	N/A	complete	426	N/A	N/A	N/A	(T)n,Gypsy-40_SB-I,Gypsy32-ZM_I-int	0
c22247/f1p0/3304	3304	N/A	N/A	complete	426	1	-	N/A	none	0
c39664/f1p0/3634	3634	N/A	N/A	complete	429	N/A	N/A	N/A	none	0
c43187/f1p0/2390	2390	N/A	N/A	complete	432	1	-	N/A	none	0.0168474
c34684/f1p0/1108	1107	1	N/A	complete	435	N/A	N/A	N/A	(GGC)n,(CGTCTG)n	1.12357
c30168/f1p0/1066	1065	1	N/A	complete	435	N/A	N/A	N/A	(GGC)n,(CGTCTG)n	0.866522
c23259/f1p0/3672	3672	N/A	N/A	complete	435	5	Transcription regulator HTH, APSES-type DNA-binding domain	N/A	none	0
c34297/f1p0/2394	2394	1	N/A	5prime_partial	438	1	-	N/A	(CCG)n	0.522067
c11379/f1p0/1146	1146	1	N/A	complete	444	1	-	lincRNA147_PMID_24635777	none	0.135416
c26627/f1p0/1339	1339	1	N/A	complete	444	1	-	lincRNA147_PMID_24635777	none	0
c30031/f1p0/2386	2376	N/A	N/A	complete	447	1	-	N/A	EnSpm-18_SBi,(CGCTCTC)n,(CT)n	0.449087
c37563/f1p0/3112	3097	N/A	N/A	complete	447	N/A	N/A	N/A	none	0.0650069
c22349/f1p0/1719	1719	N/A	N/A	complete	450	1	-	N/A	(ACTCTAC)n,(CCGAC)n	0.0117118
c34051/f1p0/4777	4763	1	N/A	complete	450	2	-	N/A	(CTCTCCG)n	0
c19290/f1p0/3505	3510	N/A	N/A	complete	453	N/A	N/A	N/A	(TTTTG)n	0.0263306
c3623/f1p0/1283	1280	N/A	N/A	5prime_partial	456	N/A	N/A	N/A	(ATAC)n,(AC)n	0.0314573
c10086/f1p0/2339	2347	N/A	N/A	complete	456	2	-	N/A	(GCC)n	0.240185
c18936/f1p0/3704	3697	1	N/A	complete	456	N/A	N/A	TCONS_00012768	(CTT)n,MuDR-N4_SBi,RLG_scDEL_2_2-LTR,Gypsy-126_SBi-LTR,RLG_scDEL_1_4-LTR	0.669713
c27128/f1p0/1515	1516	1	N/A	5prime_partial	459	2	-	N/A	none	0.584325
c11234/f1p0/4630	4632	N/A	N/A	complete	462	1	-	N/A	(A)n,A-rich	0
c16770/f1p0/6002	5944	1	N/A	5prime_partial	462	N/A	N/A	N/A	STOWAWAY13_SB	0
c44707/f1p0/2389	2388	1	N/A	5prime_partial	465	1	-	N/A	(CCG)n	0.347704
c3693/f1p0/1146	1146	N/A	N/A	complete	465	N/A	N/A	CNT0018382	hAT-N2_SBi	2.19597
c9818/f1p0/3958	3958	N/A	N/A	complete	465	1	-	N/A	none	0
c3220/f1p0/5795	5795	N/A	N/A	complete	468	1	-	N/A	Copia-7_TA-I	0
c13966/f1p0/6355	6366	1	N/A	3prime_partial	468	N/A	N/A	TCONS_00063429	Gypsy-133_SBi-I,Gypsy-133_SBi-LTR,(GCC)n,HARB-N30_SBi	0.0482123
c31415/f1p0/5394	5221	1	N/A	complete	474	1	-	CNT0018853	(TGTTT)n,(TCTTGTG)n,(T)n,MuDR-17_SBi,(GTTCCAA)n	0.0332454
c26919/f1p0/1244	1251	1	N/A	complete	474	N/A	N/A	CNT0027787	(TTTA)n,Helitron-N10_SBi	0.459119
c5028/f1p0/1188	1188	1	N/A	complete	474	N/A	N/A	CNT0027787	(TTTA)n,Helitron-N10_SBi	0.937082
c20341/f1p0/983	982	N/A	N/A	5prime_partial	474	N/A	N/A	N/A	none	1.04559
c29823/f1p0/643	643	N/A	N/A	5prime_partial	474	5	-	Si_lincRNA32	none	16.7511
c4071/f1p0/2551	2556	1	N/A	5prime_partial	480	1	-	N/A	(ATTT)n	2.08297
c29982/f1p0/4076	4080	N/A	N/A	complete	480	1	-	N/A	(CTGC)n	0
c39217/f1p0/3432	3432	N/A	N/A	complete	480	N/A	N/A	N/A	(GTG)n	0
c29299/f1p0/1413	1413	N/A	N/A	complete	483	4	-	N/A	(AGCTGC)n,(GCG)n	5.95573
c9957/f1p0/1608	1608	N/A	N/A	5prime_partial	483	3	P-loop containing nucleoside triphosphate hydrolase;;Signal recognition particle receptor, beta subunit	N/A	(TCC)n	0
c4817/f1p0/5277	5277	N/A	N/A	complete	483	1	-	N/A	none	0
c12425/f1p0/4848	4846	N/A	N/A	5prime_partial	486	1	-	N/A	(A)n,A-rich	0
c6274/f1p0/15827	15815	N/A	N/A	complete	486	N/A	N/A	lincRNA92_PMID_24635777	Tourist1a_SB,A-rich	0
c38319/f1p0/1196	1195	1	N/A	5prime_partial	486	1	-	N/A	none	0.923206
c34892/f1p0/3476	3476	N/A	N/A	complete	486	4	Transcription factor domain, fungi	N/A	none	0
c32166/f1p0/1105	1105	N/A	N/A	5prime_partial	492	1	-	N/A	none	0.491929
c38675/f1p0/1239	1236	N/A	N/A	complete	492	2	-	N/A	none	1.17109
c38753/f1p0/836	837	1	N/A	5prime_partial	498	N/A	N/A	N/A	none	6.19542
c44025/f1p0/2181	2181	N/A	N/A	complete	507	5	NAD(P)-binding domain;;Aspartate/homoserine dehydrogenase, NAD-binding	N/A	none	0.0184618
c16273/f1p1/2788	2794	N/A	N/A	3prime_partial	510	1	-	N/A	(CT)n,(TC)n,(A)n	0.783873
c32942/f1p0/5669	5669	N/A	N/A	complete	510	1	-	N/A	(GCGCA)n,(ACGCGC)n	0
c38027/f1p0/1638	1603	N/A	N/A	complete	516	1	-	N/A	(GCC)n,(CCGCTCC)n	0.0739207
c37664/f1p0/1517	1523	N/A	N/A	complete	519	1	-	N/A	ZhAT6_ZM,(TAAT)n,(ATT)n,(T)n	0.237943
c28261/f1p0/2874	2874	N/A	N/A	5prime_partial	522	3	-	N/A	none	0.0140102
c5885/f1p0/1121	1121	N/A	N/A	complete	528	6	Homocysteine-binding domain	N/A	Gypsy-143_ZM-I	0
c10979/f1p0/3414	3414	N/A	N/A	complete	528	2	Frequency clock protein	N/A	none	0.0176913
c11487/f1p0/3483	3483	N/A	N/A	complete	531	4	Protein of unknown function DUF2457	N/A	(ACCCT)n,(GATGAA)n	0.0173408
c37251/f1p0/1150	1150	N/A	N/A	5prime_partial	534	N/A	N/A	N/A	(ACCGCC)n	0
c4527/f1p0/2644	2643	N/A	N/A	3prime_partial	534	1	-	N/A	(CAA)n	0
c42151/f1p0/2513	2520	1	N/A	5prime_partial	534	1	-	N/A	(TCGCCG)n	0.135816
c35789/f1p0/1501	1519	1	N/A	5prime_partial	534	1	-	N/A	(TTTTGC)n	0.662694
c19817/f1p0/1105	1105	1	N/A	complete	537	1	-	N/A	(GAA)n,GA-rich	5.62985
c20009/f1p0/1396	1396	N/A	N/A	5prime_partial	540	1	-	N/A	none	1.09595
c30731/f1p0/1129	1129	1	N/A	5prime_partial	549	2	-	N/A	(CGC)n	0.556638
c19225/f1p1/1349	1349	1	N/A	5prime_partial	549	1	-	N/A	(CGC)n	0.539631
c11178/f2p1/2382	2380	1	N/A	5prime_partial	549	2	-	N/A	none	0.493441
c8436/f1p0/2196	2196	N/A	N/A	complete	555	5	-;;Major facilitator superfamily domain	N/A	(CCGA)n	0
c16851/f1p0/1094	1094	N/A	N/A	5prime_partial	555	4	Major facilitator superfamily domain;;Major facilitator, sugar transporter-like	N/A	none	0
c23866/f1p0/3611	3610	N/A	N/A	complete	561	1	-	N/A	(A)n	0
c13728/f1p0/7215	7214	N/A	N/A	complete	567	1	-	N/A	(AACACTT)n	0
c38771/f1p0/2489	2489	N/A	N/A	complete	567	9	Aspartic peptidase A1 family;;Aspartic peptidase, active site;;Aspartic peptidase domain;;Peptidase family A1 domain	N/A	none	0
c16539/f2p0/5243	5238	1	N/A	5prime_partial	570	2	-	CNT0018178	(CGC)n,RLG_scDEL_2_2-LTR,LTR-1_SBi,RLG_scDEL_2_1-LTR	0.56213
c28338/f1p0/3531	3531	N/A	N/A	complete	570	4	-	N/A	none	0
c5089/f1p3/3354	3352	1	N/A	complete	579	6	Zinc finger, BED-type	N/A	(GTCGCC)n,(TTTA)n	1.24262
c2429/f1p0/17114	17097	N/A	N/A	complete	585	2	-	N/A	A-rich,(T)n	0
c6743/f1p0/3373	3497	1	N/A	3prime_partial	603	1	-	N/A	EnSpm-34_SBi	0.46057
c32559/f1p0/3439	3439	N/A	N/A	complete	618	2	-;;Uncharacterised protein family, zinc metallopeptidase-like	N/A	(CCTG)n	0
c32946/f1p0/1264	1269	N/A	N/A	complete	627	1	-	N/A	none	2.4201
c24312/f1p0/3465	3465	N/A	N/A	complete	630	1	-	N/A	none	0.0116206
c37175/f1p0/4671	4684	N/A	N/A	complete	636	2	-	N/A	A-rich,(ATTT)n,(T)n,(GCCGGCG)n,(CGTGGC)n	0
c27628/f1p0/5291	5277	N/A	N/A	complete	639	N/A	N/A	N/A	(A)n,A-rich	0
c4890/f1p0/2308	2308	N/A	N/A	complete	654	6	-;;2-isopropylmalate synthase;;2-isopropylmalate synthase LeuA, allosteric (dimerisation) domain	N/A	none	0
c20101/f1p0/4208	4207	N/A	N/A	complete	672	1	-	N/A	(A)n	0
c13831/f1p0/5374	5374	N/A	N/A	complete	678	6	Ras guanine nucleotide exchange factor domain;;Ras guanine-nucleotide exchange factors catalytic domain	N/A	(ATAAC)n	0.0112389
c17638/f1p0/844	844	N/A	N/A	5prime_partial	678	1	-	N/A	EnSpm-N36_SBi	0
c24941/f1p0/10764	10770	N/A	N/A	complete	684	1	-	N/A	(T)n,(CACGCA)n,(CGC)n,(CGCCGG)n,(AAAATAA)n,GA-rich	0
c4770/f1p0/1275	1322	1	N/A	3prime_partial	705	N/A	N/A	N/A	(CCCCA)n	3.92906
c5750/f1p0/6489	6489	N/A	N/A	complete	708	1	-	N/A	none	0
c28639/f1p0/1072	1080	1	N/A	5prime_partial	711	1	-	N/A	none	0.201628
c21291/f1p0/3444	3444	N/A	N/A	complete	726	9	-;;Zn(2)-C6 fungal-type DNA-binding domain	N/A	none	0
c33489/f1p0/830	830	N/A	N/A	5prime_partial	729	2	-	N/A	none	0
c23654/f1p0/3513	3514	N/A	N/A	complete	729	2	Nucleoporin Nup85-like	N/A	none	0.0286463
c29036/f1p0/1132	1132	N/A	N/A	5prime_partial	735	N/A	N/A	N/A	(ATTT)n	0
c3868/f1p0/5672	5672	N/A	N/A	complete	738	2	-	N/A	none	0
c11792/f1p0/1271	1265	N/A	N/A	complete	750	N/A	N/A	N/A	Copia-56_SB-LTR,Copia-35_SB-LTR	0.238727
c45157/f1p0/2796	2796	N/A	N/A	complete	762	3	Sin3 associated polypeptide p18	N/A	none	0
c19201/f1p1/3395	3381	1	N/A	complete	771	6	Zinc finger, BED-type	N/A	(GTCGCC)n	0.155243
c32056/f1p0/3328	3318	1	N/A	complete	783	2	-	N/A	none	0
c41295/f1p0/2414	2414	N/A	N/A	complete	795	3	-;;Protein of unknown function DUF3433	N/A	none	0
c34629/f1p0/1295	1295	1	N/A	5prime_partial	801	1	-	N/A	none	3.54706
c4117/f1p0/2434	2432	1	N/A	5prime_partial	807	1	-	N/A	(CCT)n,Gypsy-132_SBi-LTR	0.114035
c27116/f1p0/1555	1567	1	N/A	5prime_partial	813	1	-	N/A	none	0.855197
c5599/f1p0/1063	1078	1	N/A	complete	822	N/A	N/A	N/A	(CATG)n,EnSpm-2_TD,(TG)n	0.731406
c11585/f1p0/2339	2339	N/A	N/A	complete	834	7	PAS domain;;PAS fold-3	N/A	none	0.0344295
c27301/f1p0/1120	1120	N/A	N/A	5prime_partial	846	6	-;;Fukutin-related;;LicD family	N/A	GA-rich	0
c12806/f1p0/1305	1303	N/A	N/A	3prime_partial	858	2	-	N/A	none	1.25153
c20688/f1p0/1207	1207	N/A	N/A	complete	876	5	Clathrin light chain	N/A	none	0
c34872/f1p0/1483	1483	N/A	N/A	complete	897	4	-;;Zn(2)-C6 fungal-type DNA-binding domain	N/A	none	0.0271512
c9949/f1p0/2372	2373	N/A	N/A	complete	897	4	-	N/A	none	0.0424202
c17041/f1p0/3819	3819	N/A	N/A	complete	900	2	-	N/A	none	0
c27537/f1p0/2539	2541	N/A	N/A	complete	909	6	DZF domain	N/A	GA-rich,(TTC)n,(TTTC)n	0
c42227/f1p0/3017	2847	1	N/A	complete	909	2	-	CNT0029044	Gypsy-177_ZM-I	1.81031
c29500/f1p0/5760	5760	N/A	N/A	complete	912	2	-	N/A	A-rich,(ACAATAC)n	0
c16155/f1p0/3571	3571	N/A	N/A	complete	915	6	-;;Brefeldin A-sensitivity protein 4	N/A	none	0
c30776/f1p0/2660	2660	N/A	N/A	complete	918	5	-	N/A	(GACGAT)n	0
c16985/f1p0/3383	3383	N/A	N/A	complete	918	7	-;;P-loop containing nucleoside triphosphate hydrolase;;tRNA ligase, kinase, fungi	N/A	none	0
c29675/f1p0/3485	3485	N/A	N/A	complete	936	3	-	N/A	none	0
c9216/f1p0/1787	1787	N/A	N/A	complete	951	12	-;;Basic-leucine zipper domain	N/A	none	0.0225323
c23340/f1p0/1666	1666	N/A	N/A	complete	954	8	GAT domain	N/A	(ATG)n	0
c11831/f1p0/1454	1454	N/A	N/A	5prime_partial	954	5	-	N/A	(TCCGCA)n,A-rich,(GTT)n	0
c11167/f1p0/1753	1754	N/A	N/A	complete	966	2	-	N/A	(CCG)n,(CCCGCAG)n	2.51371
c39707/f1p0/4151	4151	N/A	N/A	complete	966	6	Phospholipid/glycerol acyltransferase;;Glycerol-3-phosphate O-acyltransferase/Dihydroxyacetone phosphate acyltransferase	N/A	none	0
c16749/f1p0/2588	2590	N/A	N/A	5prime_partial	972	N/A	N/A	N/A	none	0
c31292/f1p0/4290	4252	N/A	N/A	complete	975	3	-	N/A	none	0
c28340/f1p0/3504	3504	N/A	N/A	complete	1014	2	-;;TRP-like family	N/A	(GAGGAC)n	0
c17912/f1p0/1250	1250	1	N/A	5prime_partial	1029	2	-	N/A	(ACACC)n,(TGGTGA)n	0.580027
c15608/f1p0/1456	1456	N/A	N/A	5prime_partial	1029	5	-;;Nucleotide-diphospho-sugar transferases	N/A	none	0
c9439/f1p0/1203	1203	N/A	N/A	complete	1062	6	Peroxisomal membrane protein 14;;Peroxisome membrane anchor protein Pex14p, N-terminal	N/A	none	0
c33802/f1p0/2502	2504	1	N/A	5prime_partial	1101	2	-	N/A	(TTTG)n,(TG)n	0.384707
c13264/f1p0/3676	3675	N/A	N/A	complete	1107	9	-;;Cytochrome P450;;Cytochrome P450, E-class, group I	N/A	(TGC)n	0
c28930/f1p0/2787	2787	N/A	N/A	complete	1116	3	P-loop containing nucleoside triphosphate hydrolase;;Mitochondrial escape protein 2	N/A	none	0
c4137/f1p0/1467	1442	N/A	N/A	3prime_partial	1131	3	-	N/A	none	0.415929
c25552/f1p0/1783	1784	N/A	N/A	complete	1158	3	-	N/A	none	0
c13332/f1p0/2589	2589	N/A	N/A	5prime_partial	1161	5	-;;Ribosomal protein S5 domain 2-type fold;;Exoribonuclease, phosphorolytic domain 1	N/A	none	0
c2768/f1p0/1562	1562	N/A	N/A	complete	1167	1	-	N/A	none	0
c19939/f1p0/1349	1349	N/A	N/A	5prime_partial	1173	N/A	N/A	N/A	none	0.0149241
c7152/f1p0/2804	2803	N/A	N/A	complete	1176	5	-;;Transcription factor domain, fungi	N/A	(CAG)n,(GCATCA)n	0.0215476
c38171/f1p0/1381	1381	N/A	N/A	complete	1224	3	Alpha/beta hydrolase fold-1;;Alpha/Beta hydrolase fold	N/A	none	0
c11668/f1p0/1621	1621	N/A	N/A	complete	1257	N/A	N/A	N/A	(CTTTTC)n	0.757614
c13085/f1p0/1533	1533	N/A	N/A	complete	1323	1	-	N/A	none	0.105063
c9389/f1p0/2021	2021	N/A	N/A	complete	1350	23	FERM domain;;PH domain-like;;FERM central domain;;FERM, C-terminal PH-like domain;;FERM/acyl-CoA-binding protein, 3-helical bundle;;Ezrin/radixin/moesin, C-terminal;;Moesin tail domain;;Ezrin/radixin/moesin-like	N/A	none	0
c19867/f1p0/3393	3393	N/A	N/A	5prime_partial	1383	3	-	N/A	GA-rich,A-rich	0
c38710/f1p0/3242	3242	N/A	N/A	complete	1437	3	-	N/A	(T)n,(CCG)n	0
c31371/f1p0/1692	1692	N/A	N/A	complete	1461	9	-	N/A	none	0
c18150/f1p0/1482	1482	N/A	N/A	internal	1485	2	-	N/A	none	2.44526
c6796/f1p0/5664	5664	N/A	N/A	complete	1608	9	-;;Collagen triple helix repeat	N/A	(ACG)n,(GGTAAGCCA)n,(AAGCCAGGA)n	0.021327
c29167/f1p0/6448	6449	N/A	N/A	5prime_partial	1869	1	-	NONATHG001721.1	A-rich,(A)n,(CAAA)n,(ACAA)n	0
c29317/f1p0/3898	3898	N/A	N/A	no ORF	N/A	N/A	N/A	CNT0021886	(A)n	0.0103297
c28908/f1p0/3153	3063	N/A	N/A	no ORF	N/A	N/A	N/A	CNT0025979	(A)n	0
c30524/f1p0/2041	2024	N/A	N/A	no ORF	N/A	N/A	N/A	N/A	(A)n	0
c36148/f1p0/4811	4807	1	N/A	no ORF	N/A	N/A	N/A	N/A	(A)n	0
c32650/f1p0/1881	1876	N/A	N/A	no ORF	N/A	N/A	N/A	N/A	(A)n	0
c30952/f1p0/3749	3755	1	N/A	no ORF	N/A	N/A	N/A	CNT0021253	(AACC)n,(GCGG)n	0
c8935/f1p0/907	907	N/A	N/A	no ORF	N/A	N/A	N/A	N/A	(AAGA)n	0
c24680/f1p1/2787	2789	1	N/A	no ORF	N/A	N/A	N/A	N/A	(AATTTG)n,EnSpm-1_HV	2.16558
c40190/f1p0/5109	5109	N/A	N/A	no ORF	N/A	N/A	N/A	N/A	(AGAAT)n	0
c43108/f1p0/2494	2494	N/A	N/A	no ORF	N/A	N/A	N/A	N/A	(ATATATA)n,(CGTCGG)n	0
c18221/f1p0/6820	6822	N/A	N/A	no ORF	N/A	N/A	N/A	N/A	(ATG)n,(TGATAA)n,(AATAAT)n	0
c8128/f1p0/545	545	1	N/A	no ORF	N/A	N/A	N/A	N/A	(ATGTTTC)n	9.30904
c14597/f1p0/5628	5563	1	N/A	no ORF	N/A	N/A	N/A	CNT0017582	(ATT)n,(A)n,(ACACAG)n,(ATAA)n,A-rich	0
c4005/f1p0/2335	2336	1	N/A	no ORF	N/A	N/A	N/A	N/A	(ATTAA)n	0.151688
c3023/f1p0/2435	2361	1	N/A	no ORF	N/A	N/A	N/A	N/A	(ATTCG)n	0.0805121
c6864/f1p1/6478	6497	1	N/A	no ORF	N/A	N/A	N/A	CNT0019050	(ATTTGT)n	0.154738
c10821/f1p0/4200	4123	1	N/A	no ORF	N/A	N/A	N/A	CNT0019050	(ATTTGT)n	0.0473792
c4840/f1p0/7433	7433	N/A	N/A	no ORF	N/A	N/A	N/A	N/A	(C)n,GA-rich	0
c36291/f1p0/2640	2623	1	N/A	no ORF	N/A	N/A	N/A	N/A	(C)n	0
c5564/f1p0/3478	3367	1	N/A	no ORF	N/A	N/A	N/A	N/A	(C)n,(CCGCGG)n	0
c32726/f1p0/3512	3507	N/A	N/A	no ORF	N/A	N/A	N/A	N/A	(CAGCGC)n,(C)n,L1-5_SBi	0.0686998
c32655/f1p0/700	701	1	N/A	no ORF	N/A	N/A	N/A	CNT0017367	(CATCTTT)n	3.64743
c23269/f1p0/1826	1883	1	N/A	no ORF	N/A	N/A	N/A	N/A	(CCACCG)n	0.130904
c8742/f1p0/8182	8148	1	N/A	no ORF	N/A	N/A	N/A	N/A	(CCCCTT)n	0.0247087
c3837/f1p0/2647	2627	N/A	N/A	no ORF	N/A	N/A	N/A	N/A	(CCCT)n,(TTTTCA)n	0.423303
c20883/f1p0/1026	1026	N/A	N/A	no ORF	N/A	N/A	N/A	N/A	(CCTCTCT)n,(CCCT)n,EnSpm-36_SBi	0.23547
c3349/f1p0/3776	3776	1	N/A	no ORF	N/A	N/A	N/A	N/A	(CGAG)n,(GC)n,(A)n	0
c34775/f1p0/5542	5542	N/A	N/A	no ORF	N/A	N/A	N/A	N/A	(CGAGAA)n	0
c22270/f1p0/2200	2200	N/A	N/A	no ORF	N/A	N/A	N/A	N/A	(CGATCG)n,GA-rich,A-rich	0
c22174/f1p0/1362	1365	1	N/A	no ORF	N/A	N/A	N/A	N/A	(CGC)n	0.546622
c16243/f1p0/3841	3841	N/A	N/A	no ORF	N/A	N/A	N/A	N/A	(CGG)n	0
c23413/f1p0/1108	1109	1	N/A	no ORF	N/A	N/A	N/A	N/A	(CGGCGC)n,(CTC)n	0.405319
c11184/f1p0/1872	1869	1	N/A	no ORF	N/A	N/A	N/A	N/A	(CGGCTA)n	0.595539
c7478/f1p2/3354	3353	1	N/A	no ORF	N/A	N/A	N/A	N/A	(CT)n,(CTGCTGG)n,DNA-1_SBi	0.297428
c12945/f1p0/1397	1397	1	N/A	no ORF	N/A	N/A	N/A	N/A	(CT)n	2.11847
c21858/f1p0/1039	1043	N/A	N/A	no ORF	N/A	N/A	N/A	N/A	(CTAG)n,(TATA)n	0.328145
c39875/f1p0/4186	4189	1	N/A	no ORF	N/A	N/A	N/A	CNT0020299	(CTC)n,STOWAWAY13_SB,STOWAWAY12_SB	0.162296
c16509/f1p0/1043	1043	1	N/A	no ORF	N/A	N/A	N/A	N/A	(CTC)n,EnSpm-36_SBi	3.90747
c39997/f1p0/4874	4873	N/A	N/A	no ORF	N/A	N/A	N/A	N/A	(GCCCCG)n,Copia-127_SB-I,Copia-93_SB-LTR	0
c39337/f1p0/2293	2291	N/A	N/A	no ORF	N/A	N/A	N/A	N/A	(GCGACG)n	0.189897
c11950/f1p0/1253	1251	1	N/A	no ORF	N/A	N/A	N/A	N/A	(GCGCCG)n,(GCG)n	0.0179848
c20571/f1p0/2465	2453	N/A	N/A	no ORF	N/A	N/A	N/A	N/A	(GCGGCG)n,(CCT)n,(TCCCTT)n	0.0715347
c19088/f1p0/410	411	1	N/A	no ORF	N/A	N/A	N/A	N/A	(GCTA)n	0
c22856/f1p0/2668	2661	1	N/A	no ORF	N/A	N/A	N/A	N/A	(GGC)n,A-rich,GA-rich,Gypsy-126_SBi-I	0.602728
c23022/f1p0/1271	1265	N/A	N/A	no ORF	N/A	N/A	N/A	N/A	(GGTGCT)n	0
c37166/f1p0/1166	1171	1	N/A	no ORF	N/A	N/A	N/A	N/A	(GTC)n	2.09751
c38131/f1p0/3878	3879	N/A	N/A	no ORF	N/A	N/A	N/A	N/A	(GTGTGGTG)n,MuDR-9_SBi	0
c16740/f1p0/3871	3871	N/A	N/A	no ORF	N/A	N/A	N/A	N/A	(T)n,(GCGCC)n	0
c14522/f1p0/5833	5870	1	N/A	no ORF	N/A	N/A	N/A	N/A	(T)n,(TAACA)n	0
c24862/f1p0/1904	1899	N/A	N/A	no ORF	N/A	N/A	N/A	N/A	(T)n	0
c29731/f1p0/2011	2011	1	N/A	no ORF	N/A	N/A	N/A	N/A	(T)n	0.210236
c34373/f1p0/11194	11190	1	N/A	no ORF	N/A	N/A	N/A	N/A	(T)n,(GTG)n,(TCTTCC)n,(TTCCTTT)n,(AATTTCA)n,(TAT)n,A-rich,(TTTTA)n,(TCTTCCA)n,(TAATTTT)n,(TTTA)n,(TTTC)n	0
c8297/f1p0/1246	1249	1	N/A	no ORF	N/A	N/A	N/A	CNT0019737	(T)n,LINE1-47_ZM	0
c36207/f1p0/2064	2122	1	N/A	no ORF	N/A	N/A	N/A	CNT0030924	(T)n,(CAACC)n	0.0379503
c24865/f1p0/2282	2282	N/A	N/A	no ORF	N/A	N/A	N/A	N/A	(T)n	0
c36032/f1p0/2246	2245	N/A	N/A	no ORF	N/A	N/A	N/A	N/A	(T)n	0
c18322/f1p0/2458	2455	N/A	N/A	no ORF	N/A	N/A	N/A	N/A	(T)n,GA-rich,A-rich	0
c16944/f1p0/3847	3670	1	N/A	no ORF	N/A	N/A	N/A	CNT0019301	(T)n,Gypsy-64_SB-LTR	0.121221
c20335/f1p0/1798	1818	1	N/A	no ORF	N/A	N/A	N/A	N/A	(T)n	0
c26183/f1p0/3836	3839	N/A	N/A	no ORF	N/A	N/A	N/A	N/A	(T)n,(CCG)n	0
c35154/f1p0/4039	4048	N/A	N/A	no ORF	N/A	N/A	N/A	N/A	(T)n,(CGGCCCG)n,(TG)n	0
c20606/f1p0/2667	2653	1	N/A	no ORF	N/A	N/A	N/A	N/A	(T)n	0.086693
c18671/f1p0/4145	4046	1	N/A	no ORF	N/A	N/A	N/A	N/A	(T)n,RTE-1_SBi,(A)n	0.0447834
c3600/f1p0/2405	2368	1	N/A	no ORF	N/A	N/A	N/A	N/A	(T)n	0.173319
c31498/f1p0/3362	3385	N/A	N/A	no ORF	N/A	N/A	N/A	N/A	(T)n	0.0133761
c30403/f1p0/3048	3034	1	N/A	no ORF	N/A	N/A	N/A	N/A	(T)n	0.0729925
c5445/f1p0/7993	7987	1	N/A	no ORF	N/A	N/A	N/A	N/A	(T)n,(CCCGCG)n,(A)n	0
c29673/f1p0/5012	5011	N/A	N/A	no ORF	N/A	N/A	N/A	N/A	(T)n	0
c40418/f1p0/4065	4065	N/A	N/A	no ORF	N/A	N/A	N/A	N/A	(T)n	0
c5601/f1p0/4176	4175	N/A	N/A	no ORF	N/A	N/A	N/A	N/A	(T)n	0
c12902/f1p0/2731	2733	N/A	N/A	no ORF	N/A	N/A	N/A	CNT0020545	(T)n	0
c8761/f1p0/6730	6730	N/A	N/A	no ORF	N/A	N/A	N/A	N/A	(T)n	0
c15644/f1p0/2229	2229	N/A	N/A	no ORF	N/A	N/A	N/A	N/A	(T)n	0
c28613/f1p0/1632	1628	N/A	N/A	no ORF	N/A	N/A	N/A	N/A	(T)n	0
c34976/f1p0/2968	2951	N/A	N/A	no ORF	N/A	N/A	N/A	N/A	(T)n	0.0204669
c3098/f1p0/3641	3634	N/A	N/A	no ORF	N/A	N/A	N/A	N/A	(T)n	0
c8947/f1p0/3196	3226	1	N/A	no ORF	N/A	N/A	N/A	N/A	(T)n	0.136458
c23044/f1p0/3677	3670	N/A	N/A	no ORF	N/A	N/A	N/A	N/A	(T)n,(A)n	0
c9744/f1p0/3864	3844	N/A	N/A	no ORF	N/A	N/A	N/A	N/A	(TA)n	0.261871
c30380/f1p0/3500	3503	1	N/A	no ORF	N/A	N/A	N/A	CNT0027489	(TATA)n,EnSpm-21N_SBi	0.0119914
c4173/f1p0/1432	1432	N/A	N/A	no ORF	N/A	N/A	N/A	N/A	(TATTAA)n	0
c11939/f1p0/2304	2302	N/A	N/A	no ORF	N/A	N/A	N/A	N/A	(TCCTCT)n	0.357182
c22891/f1p0/1229	1231	N/A	N/A	no ORF	N/A	N/A	N/A	N/A	(TCGC)n,(CGC)n	0.0163942
c15343/f1p0/7210	7199	1	N/A	no ORF	N/A	N/A	N/A	N/A	(TCTTT)n,(TCTTTT)n,(TTTC)n,(TTTTAT)n	0
c22051/f1p0/1225	1225	1	N/A	no ORF	N/A	N/A	N/A	CNT0028846	(TGC)n,EnSpm-30_SBi	5.52878
c29092/f1p0/3482	3471	N/A	N/A	no ORF	N/A	N/A	N/A	N/A	(TGCGCCC)n,EnSpm-41N2_SBi	0.23781
c30619/f1p0/1084	1085	N/A	N/A	no ORF	N/A	N/A	N/A	N/A	(TGTAA)n	0.0185554
c35962/f1p0/2269	2271	N/A	N/A	no ORF	N/A	N/A	N/A	N/A	(TTCTT)n	0
c12481/f1p0/4269	4269	N/A	N/A	no ORF	N/A	N/A	N/A	N/A	(TTT)n	0
c39667/f1p0/2288	2281	1	N/A	no ORF	N/A	N/A	N/A	N/A	(TTTC)n	0.667907
c38715/f1p0/1471	1471	N/A	N/A	no ORF	N/A	N/A	N/A	N/A	(TTTCC)n	0
c23043/f1p0/8717	8718	N/A	N/A	no ORF	N/A	N/A	N/A	N/A	(TTTTC)n,(A)n	0
c10101/f1p0/1035	1036	N/A	N/A	no ORF	N/A	N/A	N/A	N/A	(TTTTGGA)n	0.116598
c30801/f1p0/4267	4262	1	N/A	no ORF	N/A	N/A	N/A	N/A	A-rich	0.0661326
c31796/f1p0/1623	1619	N/A	N/A	no ORF	N/A	N/A	N/A	N/A	A-rich	0
c21316/f1p0/8864	8864	N/A	N/A	no ORF	N/A	N/A	N/A	N/A	A-rich	0
c29564/f1p0/4899	4753	N/A	N/A	no ORF	N/A	N/A	N/A	N/A	ATHILA-6_SBi-I,RLG_scTat_2_1-I,(GAAGA)n	0
c9282/f1p0/1334	1334	N/A	N/A	no ORF	N/A	N/A	N/A	N/A	ATHILA-7_SBi-LTR	0.392591
c29124/f1p0/1188	1190	1	N/A	no ORF	N/A	N/A	N/A	N/A	Copia-141_SB-I,(CCTCCGT)n	0
c32630/f1p0/2528	2553	1	N/A	no ORF	N/A	N/A	N/A	N/A	Copia-33_BD-I	0.100133
c43042/f1p0/2257	2252	1	N/A	no ORF	N/A	N/A	N/A	CNT0021265	Copia-52_ZM-I	0.86905
c20020/f1p0/2511	2522	N/A	N/A	no ORF	N/A	N/A	N/A	N/A	Copia-69_SB-LTR	0.0718453
c22772/f1p0/3788	3698	1	N/A	no ORF	N/A	N/A	N/A	CNT0021530	DNA-4_SBi,RTE-1_BDi,(AT)n	0.431767
c11907/f2p0/1225	1225	1	N/A	no ORF	N/A	N/A	N/A	N/A	EnSpm-30_SBi,GA-rich	0.456919
c26352/f1p0/1127	1131	1	N/A	no ORF	N/A	N/A	N/A	N/A	EnSpm-44_SBi	4.09591
c24484/f1p0/5237	5128	N/A	N/A	no ORF	N/A	N/A	N/A	CNT0028386	EnSpm-N1_SB,EnSpm-33_SBi,EnSpm-N11_SBi	0
c30937/f1p0/2461	2588	N/A	N/A	no ORF	N/A	N/A	N/A	N/A	EnSpm-N14_SBi	0.917949
c8966/f1p0/861	860	N/A	N/A	no ORF	N/A	N/A	N/A	N/A	EWAY1_TM_LTR	0.88269
c34754/f1p0/4858	4810	1	N/A	no ORF	N/A	N/A	N/A	N/A	G-rich,(CCTCGCC)n	0
c19061/f1p0/11142	11123	N/A	N/A	no ORF	N/A	N/A	N/A	N/A	G-rich,(GGCGGA)n	0
c7980/f1p0/2600	2590	1	N/A	no ORF	N/A	N/A	N/A	N/A	GA-rich,Helitron-N2_SBi,Helitron-3N1_ZM	0.411981
c6794/f1p0/1931	1934	1	N/A	no ORF	N/A	N/A	N/A	N/A	GA-rich	0.0104099
c33138/f1p0/1221	1221	N/A	N/A	no ORF	N/A	N/A	N/A	N/A	GA-rich	0.115421
c23016/f1p0/4864	4864	N/A	N/A	no ORF	N/A	N/A	N/A	N/A	Gypsy-177_ZM-I	0
c18289/f1p0/7204	7189	1	N/A	no ORF	N/A	N/A	N/A	N/A	Gypsy-42_SB-I,Gypsy-89_ZM-I,Gypsy-49_SB-I	0
c6029/f1p0/2423	2450	1	N/A	no ORF	N/A	N/A	N/A	N/A	HARB-8_SBi	0.279392
c29662/f1p0/988	988	1	N/A	no ORF	N/A	N/A	N/A	N/A	HARB-N23_SBi	2.91308
c34560/f1p0/2555	2413	N/A	N/A	no ORF	N/A	N/A	N/A	N/A	hAT-15_SBi	0.0306693
c12388/f1p0/971	968	1	N/A	no ORF	N/A	N/A	N/A	N/A	hAT-15_SBi	1.60872
c32931/f1p0/600	600	N/A	N/A	no ORF	N/A	N/A	N/A	N/A	hAT1_SB	0
c31688/f1p0/2787	2831	1	N/A	no ORF	N/A	N/A	N/A	N/A	Helitron-N2_SBi	0.103413
c7242/f1p0/1363	1363	1	N/A	no ORF	N/A	N/A	N/A	CNT0027945	Helitron-N5_SBi	0.673048
c7865/f1p0/1762	1764	1	N/A	no ORF	N/A	N/A	N/A	CNT0017453	LINE1-1_SBi	1.16273
c20910/f1p0/681	678	N/A	N/A	no ORF	N/A	N/A	N/A	N/A	LINE1-5_SBi	0
c20511/f1p0/1237	1238	1	N/A	no ORF	N/A	N/A	N/A	N/A	LINE1-59_SBi	0.54124
c31935/f1p0/1402	1445	1	N/A	no ORF	N/A	N/A	N/A	CNT0019673	LINE1-62_SBi	0.431912
c37986/f1p0/2263	2254	1	N/A	no ORF	N/A	N/A	N/A	CNT0032095	LTR-2_SBi	0.440773
c42643/f1p0/747	747	1	N/A	no ORF	N/A	N/A	N/A	N/A	Mariner-2_SBi	13.7721
c1624/f2p0/2398	2401	1	N/A	no ORF	N/A	N/A	N/A	lincRNA621_PMID_24635777	MuDR-N2_SB,Copia17-ZM_LTR,PREM4_ZM_LTR,Helitron-N15_SBi	0.184472
c12059/f1p0/2713	2706	N/A	N/A	no ORF	N/A	N/A	N/A	N/A	MuDR-N6_SBi	0.0372
c2482/f1p0/1164	1164	N/A	N/A	no ORF	N/A	N/A	N/A	N/A	OLO24B_SB	0
c12489/f1p0/2840	2836	N/A	N/A	no ORF	N/A	N/A	N/A	N/A	RLG_scTat_2_1-I	0
c35069/f1p0/4243	4242	N/A	N/A	no ORF	N/A	N/A	N/A	N/A	(GGT)n,(TTTATA)n,GA-rich	0
c26532/f1p1/1281	1285	1	N/A	no ORF	N/A	N/A	N/A	CNT0030136	ATHILA-4_SBi-I,Gypsy-120_SB-I,RLG_scTat_2_1-I,Gypsy-132_SBi-LTR,Gypsy-136_SBi-LTR	0
c18163/f1p0/1590	1589	1	N/A	no ORF	N/A	N/A	N/A	N/A	LINE1-5_ZM,(TTTCCT)n	0.846487
c34947/f1p0/933	930	1	N/A	no ORF	N/A	N/A	N/A	N/A	none	0
c25348/f1p0/1433	1431	1	N/A	no ORF	N/A	N/A	N/A	CNT0021530	HARB-N24_SBi,RTE-1_TD,RTE1_ZM	1.12551
c31088/f1p0/3582	3583	1	N/A	no ORF	N/A	N/A	N/A	CNT0019669	HARB-5_SBi,STOWAWAY1_SB,RLG_scTat_6_1-LTR,RLG_scTat_6_1-I	0
c37987/f1p0/1310	1310	1	N/A	no ORF	N/A	N/A	N/A	N/A	EnSpm-30_SBi,HARB-N4_ZM,(TGGCGG)n	0.975016
c12542/f1p0/2595	2601	1	N/A	no ORF	N/A	N/A	N/A	N/A	LINE1-49_SBi,(ACTCACA)n	1.07672
c26420/f1p0/1195	1197	N/A	N/A	no ORF	N/A	N/A	N/A	N/A	hAT-N1c_SB	0.689589
c35196/f1p0/1216	1222	1	N/A	no ORF	N/A	N/A	N/A	N/A	ATHILA-2_SBi-LTR	2.55374
c28047/f1p0/1158	1156	1	N/A	no ORF	N/A	N/A	N/A	N/A	ATHILA-2_SBi-LTR	1.34093
c26614/f1p0/1507	1548	N/A	N/A	no ORF	N/A	N/A	N/A	N/A	(CCCCCCT)n	0.55924
c40374/f1p0/3039	2833	1	N/A	no ORF	N/A	N/A	N/A	N/A	none	0.144089
c16840/f1p0/1432	1440	1	N/A	no ORF	N/A	N/A	N/A	N/A	none	0.258931
c29884/f1p0/4417	4403	1	N/A	no ORF	N/A	N/A	N/A	lincRNA91_PMID_24635777	TSB2,Tourist1a_SB,(GCGCTC)n,LTR-2_SBi,Gypsy-124N_SBi-LTR	0
c21840/f1p0/1063	1063	N/A	N/A	no ORF	N/A	N/A	N/A	N/A	LINE1-47_SBi	0
c10197/f1p0/1492	1492	1	N/A	no ORF	N/A	N/A	N/A	N/A	ATHILA-3_SBi-LTR,ATHILA-4_SBi-LTR	0.0685557
c27096/f1p0/2403	2403	1	N/A	no ORF	N/A	N/A	N/A	N/A	Copia-69_SB-LTR,(TTCTG)n,Gypsy-176_ZM-LTR,MuDR-4_SBi,Gypsy-N129_SBi-LTR	0.264735
c28419/f1p0/1267	1267	N/A	N/A	no ORF	N/A	N/A	N/A	N/A	none	0.38136
c17753/f1p0/3237	3242	1	N/A	no ORF	N/A	N/A	N/A	N/A	none	0.844553
c28753/f1p0/1511	1512	1	N/A	no ORF	N/A	N/A	N/A	N/A	RLG_scTat_7_1-LTR,RLG_scTat_7_1-I	0.599186
c7029/f1p0/1619	1617	N/A	N/A	no ORF	N/A	N/A	N/A	lincRNA627_PMID_24635777	hAT-N18_SBi	0
c11624/f1p0/2755	2755	N/A	N/A	no ORF	N/A	N/A	N/A	N/A	(ATTTTTA)n	0.0657691
c17934/f1p3/1400	1400	N/A	N/A	no ORF	N/A	N/A	N/A	CNT0019739	Gypsy-123_SBi-LTR,DNA-5_SBi	0.188939
c9061/f1p0/1385	1389	N/A	N/A	no ORF	N/A	N/A	N/A	N/A	none	1.30665
c26435/f1p0/1197	1198	1	N/A	no ORF	N/A	N/A	N/A	CNT0029181	EnSpm7_SB,(AAG)n	0.973795
c32228/f1p1/1309	1308	1	N/A	no ORF	N/A	N/A	N/A	N/A	none	1.69311
c12047/f1p0/882	882	N/A	N/A	no ORF	N/A	N/A	N/A	N/A	none	0
c8803/f1p0/1782	1777	N/A	N/A	no ORF	N/A	N/A	N/A	N/A	none	0.436867
c21895/f1p0/4520	4550	1	N/A	no ORF	N/A	N/A	N/A	CNT0019669	TEMPINDAS-N1_SB,(CTCGC)n,(CGCTCG)n,Mariner-3_SBi,Mariner-N2_SBi	0.138904
c14718/f1p0/4045	3966	N/A	N/A	no ORF	N/A	N/A	N/A	N/A	none	0.0779715
c26583/f1p0/1056	1056	1	N/A	no ORF	N/A	N/A	N/A	N/A	(CGAGCGG)n,(CGG)n,HARB-N2_SB,(TATT)n	5.04822
c17033/f1p0/4773	4726	N/A	N/A	no ORF	N/A	N/A	N/A	N/A	GA-rich,(GCA)n,STOWAWAY15_SB,Copia-134_SB-LTR	0.107268
c33031/f1p0/1184	1186	N/A	N/A	no ORF	N/A	N/A	N/A	CNT0018363	EnSpm-N12_SBi	0.339505
c5816/f1p0/633	634	1	N/A	no ORF	N/A	N/A	N/A	N/A	DNA-9-2_SBi	1.20669
c31116/f1p0/1264	1264	1	N/A	no ORF	N/A	N/A	N/A	N/A	Gypsy-126_SBi-LTR,Gypsy-137_SBi-LTR	2.85727
c24947/f1p0/1710	1723	1	N/A	no ORF	N/A	N/A	N/A	N/A	MuDR-N4_SBi,Gypsy-133_SBi-LTR	0
c43853/f1p0/2647	2681	1	N/A	no ORF	N/A	N/A	N/A	CNT0030136	Gypsy-73_SB-LTR,Gypsy-127_SBi-LTR,RLG_scTat_2_1-I,ATHILA-6_SBi-I,Gypsy-120_SB-I	0.11622
c32408/f1p0/1184	1189	1	N/A	no ORF	N/A	N/A	N/A	lincRNA147_PMID_24635777	none	0
c38554/f1p0/1069	1069	N/A	N/A	no ORF	N/A	N/A	N/A	lincRNA147_PMID_24635777	none	0.376663
c2381/f2p0/2480	2482	N/A	N/A	no ORF	N/A	N/A	N/A	N/A	ATHILA-6_SBi-I,RLG_scTat_2_1-I,(GAAGA)n	0.285726
c23275/f1p0/1086	1102	N/A	N/A	no ORF	N/A	N/A	N/A	N/A	EnSpm-30_SBi,DNA-12N_SBi	1.27884
c10170/f1p0/1221	1221	N/A	N/A	no ORF	N/A	N/A	N/A	N/A	none	0.181375
c5315/f1p1/3965	3996	1	N/A	no ORF	N/A	N/A	N/A	TCONS_00002976	none	0.0594645
c19253/f1p0/1189	1187	1	N/A	no ORF	N/A	N/A	N/A	N/A	(TCCC)n,(CA)n,A-rich	0.237453
c44075/f1p0/2237	2242	N/A	N/A	no ORF	N/A	N/A	N/A	N/A	EnSpm-22_SBi	0.689145
c21350/f1p0/1305	1304	N/A	N/A	no ORF	N/A	N/A	N/A	N/A	(T)n	0.308783
c21798/f1p1/2668	2656	1	N/A	no ORF	N/A	N/A	N/A	CNT0020869	hAT-N18_SB,(T)n,STOWAWAY12_SB	0.117393
c25635/f1p0/1070	1072	N/A	N/A	no ORF	N/A	N/A	N/A	N/A	EnSpm-14_ZM	0
c33346/f1p0/3428	3431	1	N/A	no ORF	N/A	N/A	N/A	CNT0021530	RTE-1_BDi,RTE1_ZM,(TGT)n,EnSpm-30_SBi	0.375543
c6674/f1p0/6959	6956	N/A	N/A	no ORF	N/A	N/A	N/A	N/A	STOWAWAY1_SB,TSB1,(A)n	0
c27365/f1p0/1133	1131	N/A	N/A	no ORF	N/A	N/A	N/A	N/A	ZhAT6_ZM,(TTGTGA)n	0
c43518/f1p0/573	573	1	N/A	no ORF	N/A	N/A	N/A	N/A	none	2.06041
c10289/f1p0/2475	2471	N/A	N/A	no ORF	N/A	N/A	N/A	N/A	none	0.409618
c19290/f1p0/2811	2811	N/A	N/A	no ORF	N/A	N/A	N/A	N/A	none	0
c2231/f2p0/4129	4133	1	N/A	no ORF	N/A	N/A	N/A	N/A	none	1.3305
c12637/f1p0/758	758	N/A	N/A	no ORF	N/A	N/A	N/A	N/A	none	1.37303
c17226/f1p0/2849	2832	N/A	N/A	no ORF	N/A	N/A	N/A	N/A	none	0.0853078
c29298/f1p1/2508	2508	N/A	N/A	no ORF	N/A	N/A	N/A	N/A	none	0.569212
c27280/f1p0/2250	2249	N/A	N/A	no ORF	N/A	N/A	N/A	N/A	none	0.268555
c9295/f1p0/1041	1040	N/A	N/A	no ORF	N/A	N/A	N/A	N/A	none	0.193583
c7384/f2p1/1465	1464	1	N/A	no ORF	N/A	N/A	N/A	N/A	none	3.62331
c37061/f1p0/1533	1548	N/A	N/A	no ORF	N/A	N/A	N/A	N/A	none	0.0699087
c34613/f1p0/1332	1332	1	N/A	no ORF	N/A	N/A	N/A	N/A	none	0.703959
c25351/f1p0/1512	1510	1	N/A	no ORF	N/A	N/A	N/A	N/A	none	1.51038
c34802/f1p0/652	652	1	N/A	no ORF	N/A	N/A	N/A	N/A	none	3.12496
c27736/f1p0/1086	1086	1	N/A	no ORF	N/A	N/A	N/A	N/A	none	0.259537
c2633/f1p0/1110	1110	1	N/A	no ORF	N/A	N/A	N/A	N/A	none	2.52112
c15659/f1p0/1558	1558	N/A	N/A	no ORF	N/A	N/A	N/A	N/A	none	0
c6470/f1p0/1290	1290	1	N/A	no ORF	N/A	N/A	N/A	N/A	none	0
c21912/f1p0/1311	1311	N/A	N/A	no ORF	N/A	N/A	N/A	N/A	none	0.0921403
c4696/f1p0/3022	3018	N/A	N/A	no ORF	N/A	N/A	N/A	N/A	none	0.113405
c22104/f1p1/1331	1331	1	N/A	no ORF	N/A	N/A	N/A	N/A	none	0.504066
c11777/f1p0/2441	2441	1	N/A	no ORF	N/A	N/A	N/A	N/A	none	0
c26722/f1p0/1132	1133	N/A	N/A	no ORF	N/A	N/A	N/A	N/A	none	1.93686
c35038/f1p0/2187	2190	1	N/A	no ORF	N/A	N/A	N/A	CNT0020227	none	0.283651
c15237/f1p0/3314	3283	1	N/A	no ORF	N/A	N/A	N/A	N/A	none	0
c33310/f1p0/2010	2020	1	N/A	no ORF	N/A	N/A	N/A	N/A	none	0.542522
c43320/f1p0/2261	2257	1	N/A	no ORF	N/A	N/A	N/A	N/A	none	0.738672
c31701/f1p0/2752	2790	1	N/A	no ORF	N/A	N/A	N/A	N/A	none	0.3608
c23180/f1p0/3048	3028	N/A	N/A	no ORF	N/A	N/A	N/A	N/A	none	0.0132977
c3310/f1p1/2806	2798	1	N/A	no ORF	N/A	N/A	N/A	N/A	none	1.38812
c17690/f1p0/5599	5610	1	N/A	no ORF	N/A	N/A	N/A	N/A	none	0
c42046/f1p0/544	544	N/A	N/A	no ORF	N/A	N/A	N/A	N/A	none	0
c30358/f1p0/2578	2585	N/A	N/A	no ORF	N/A	N/A	N/A	N/A	none	0.327107
c43865/f1p0/2733	2740	1	N/A	no ORF	N/A	N/A	N/A	N/A	none	0
c30556/f1p0/2358	2365	N/A	N/A	no ORF	N/A	N/A	N/A	CNT0017349	none	0.0170255
c26993/f1p0/2097	2097	N/A	N/A	no ORF	N/A	N/A	N/A	N/A	none	0
c18267/f1p0/2157	2157	N/A	N/A	no ORF	N/A	N/A	N/A	N/A	none	0
c47459/f1p0/361	361	N/A	N/A	no ORF	N/A	N/A	N/A	N/A	none	0
c22130/f1p0/1441	1441	N/A	N/A	no ORF	N/A	N/A	N/A	N/A	none	0
c6502/f1p0/2453	2450	1	N/A	no ORF	N/A	N/A	N/A	N/A	none	0.41087
c29041/f1p0/2197	2197	N/A	N/A	no ORF	N/A	N/A	N/A	N/A	none	0
c6577/f1p0/2912	2912	N/A	N/A	no ORF	N/A	N/A	N/A	N/A	none	0
c18422/f1p1/2383	2385	N/A	N/A	no ORF	N/A	N/A	N/A	N/A	none	0.261983
c39325/f1p0/2330	2330	N/A	N/A	no ORF	N/A	N/A	N/A	N/A	none	0
c6617/f1p0/2697	2684	N/A	N/A	no ORF	N/A	N/A	N/A	N/A	none	0.52465
c22401/f1p0/3418	3376	1	N/A	no ORF	N/A	N/A	N/A	N/A	none	0
c27571/f1p0/3174	3174	N/A	N/A	no ORF	N/A	N/A	N/A	N/A	none	0
c20374/f1p0/6495	6488	1	N/A	no ORF	N/A	N/A	N/A	N/A	none	0
c8712/f1p0/4137	4226	N/A	N/A	no ORF	N/A	N/A	N/A	N/A	none	0.132587
c33328/f1p0/4600	4601	N/A	N/A	no ORF	N/A	N/A	N/A	N/A	none	0
c33458/f1p0/3491	3491	N/A	N/A	no ORF	N/A	N/A	N/A	N/A	none	0
c29834/f1p0/5277	5272	N/A	N/A	no ORF	N/A	N/A	N/A	N/A	none	0
c8831/f1p0/6642	6641	N/A	N/A	no ORF	N/A	N/A	N/A	N/A	none	0
c7426/f1p0/741	740	1	N/A	no ORF	N/A	N/A	N/A	N/A	none	1.16987
c2864/f1p0/6807	6807	N/A	N/A	no ORF	N/A	N/A	N/A	N/A	none	0
c8024/f1p0/1594	1594	N/A	N/A	no ORF	N/A	N/A	N/A	N/A	none	0
c3253/f1p0/2002	1990	N/A	N/A	no ORF	N/A	N/A	N/A	N/A	none	0.954205
c22505/f1p0/5035	5025	N/A	N/A	no ORF	N/A	N/A	N/A	N/A	none	0
c3539/f1p0/4198	4178	N/A	N/A	no ORF	N/A	N/A	N/A	CNT0032087	none	0
c6186/f1p0/1124	1118	1	N/A	no ORF	N/A	N/A	N/A	N/A	none	2.01687
c6444/f1p1/1335	1345	1	N/A	no ORF	N/A	N/A	N/A	N/A	none	4.26603
c10438/f1p0/3019	2986	1	N/A	no ORF	N/A	N/A	N/A	N/A	none	0
c22590/f1p0/4310	4281	1	N/A	no ORF	N/A	N/A	N/A	N/A	none	0
c10784/f1p0/1115	1115	N/A	N/A	no ORF	N/A	N/A	N/A	N/A	none	0
c7116/f1p0/1839	1840	N/A	N/A	no ORF	N/A	N/A	N/A	N/A	none	0
c13023/f1p0/1166	1164	1	N/A	no ORF	N/A	N/A	N/A	N/A	none	0.672765
c18156/f1p0/2264	2200	N/A	N/A	no ORF	N/A	N/A	N/A	N/A	none	0.25844
c16377/f1p0/2228	2226	N/A	N/A	no ORF	N/A	N/A	N/A	N/A	none	0
c10175/f1p0/5086	5086	N/A	N/A	no ORF	N/A	N/A	N/A	N/A	none	0
c18309/f1p0/1324	1290	N/A	N/A	no ORF	N/A	N/A	N/A	N/A	none	0.287438
c12428/f1p0/1397	1397	N/A	N/A	no ORF	N/A	N/A	N/A	N/A	none	0
c31669/f1p0/6506	6506	N/A	N/A	no ORF	N/A	N/A	N/A	N/A	none	0
c16732/f1p0/1172	1172	N/A	N/A	no ORF	N/A	N/A	N/A	N/A	none	0.017178
c27462/f1p0/3287	3287	N/A	N/A	no ORF	N/A	N/A	N/A	N/A	none	0
c29319/f1p0/3004	3004	N/A	N/A	no ORF	N/A	N/A	N/A	N/A	none	0
c15031/f1p0/2085	2084	N/A	N/A	no ORF	N/A	N/A	N/A	N/A	none	0
c18936/f1p0/1137	1140	1	N/A	no ORF	N/A	N/A	N/A	N/A	none	3.03848
c31273/f1p0/1975	1920	1	N/A	no ORF	N/A	N/A	N/A	N/A	none	0.0210393
c37586/f1p0/1319	1322	N/A	N/A	no ORF	N/A	N/A	N/A	N/A	none	0.487326
c33075/f1p0/1568	1568	N/A	N/A	no ORF	N/A	N/A	N/A	N/A	none	0
c15253/f1p0/1458	1459	1	N/A	no ORF	N/A	N/A	N/A	N/A	none	0.230684
c27858/f1p0/3656	3656	N/A	N/A	no ORF	N/A	N/A	N/A	N/A	none	0
c37705/f1p0/1193	1190	1	N/A	no ORF	N/A	N/A	N/A	N/A	none	1.14109
c15496/f1p0/1404	1404	N/A	N/A	no ORF	N/A	N/A	N/A	N/A	none	0
c36151/f1p0/1944	1950	1	N/A	no ORF	N/A	N/A	N/A	N/A	none	0.633428
c37881/f1p0/1484	1488	1	N/A	no ORF	N/A	N/A	N/A	CNT0018837	none	0.66297
c19553/f1p0/1180	1183	1	N/A	no ORF	N/A	N/A	N/A	N/A	none	0.556455
c17608/f1p0/1239	1239	N/A	N/A	no ORF	N/A	N/A	N/A	N/A	none	1.36542
c30091/f1p0/2069	2072	N/A	N/A	no ORF	N/A	N/A	N/A	CNT0031169	none	0
c30156/f1p0/1121	1099	N/A	N/A	no ORF	N/A	N/A	N/A	N/A	none	1.38706
c25010/f1p0/755	755	N/A	N/A	no ORF	N/A	N/A	N/A	N/A	none	0
c34978/f1p0/1249	1237	N/A	N/A	no ORF	N/A	N/A	N/A	N/A	none	0.0182056
c30250/f1p0/1724	1717	1	N/A	no ORF	N/A	N/A	N/A	N/A	none	0.211059
c21530/f1p0/1247	1247	N/A	N/A	no ORF	N/A	N/A	N/A	N/A	none	0
c36492/f1p0/1207	1206	1	N/A	no ORF	N/A	N/A	N/A	N/A	none	1.10179
c26860/f1p0/2375	2375	N/A	N/A	no ORF	N/A	N/A	N/A	N/A	none	0
c32314/f1p0/1687	1692	1	N/A	no ORF	N/A	N/A	N/A	N/A	none	0
c32385/f1p0/1351	1301	N/A	N/A	no ORF	N/A	N/A	N/A	N/A	none	0.0157664
c20146/f1p0/1267	1300	N/A	N/A	no ORF	N/A	N/A	N/A	N/A	none	0.0457345
c26980/f1p0/1930	1940	1	N/A	no ORF	N/A	N/A	N/A	N/A	none	1.37191
c32553/f1p0/862	856	1	N/A	no ORF	N/A	N/A	N/A	N/A	none	1.35571
c32566/f1p0/1187	1186	N/A	N/A	no ORF	N/A	N/A	N/A	N/A	none	1.75918
c30765/f1p0/918	918	N/A	N/A	no ORF	N/A	N/A	N/A	N/A	none	0.43862
c36806/f1p0/672	672	N/A	N/A	no ORF	N/A	N/A	N/A	N/A	none	0
c28831/f1p0/2057	2057	N/A	N/A	no ORF	N/A	N/A	N/A	CNT0017668	none	0
c28935/f1p0/1098	1104	1	N/A	no ORF	N/A	N/A	N/A	CNT0020762	none	0.784152
c30927/f1p0/1678	1678	N/A	N/A	no ORF	N/A	N/A	N/A	N/A	none	0
c35502/f1p0/989	989	1	N/A	no ORF	N/A	N/A	N/A	N/A	none	0
c4635/f1p0/5953	5953	N/A	N/A	no ORF	N/A	N/A	N/A	N/A	none	0.0101458
c22197/f1p0/1318	1317	N/A	N/A	no ORF	N/A	N/A	N/A	N/A	none	0
c37058/f1p0/4058	4053	1	N/A	no ORF	N/A	N/A	N/A	N/A	none	0
c15370/f1p0/5639	5639	N/A	N/A	no ORF	N/A	N/A	N/A	N/A	none	0
c35767/f1p0/2310	2291	N/A	N/A	no ORF	N/A	N/A	N/A	CNT0030928	none	0
c37365/f1p0/1319	1318	1	N/A	no ORF	N/A	N/A	N/A	N/A	none	0.718254
c17746/f1p0/2886	2808	1	AGT16632.1	complete	300	N/A	N/A	N/A	RLG_scTat_2_1-I	0.127761
c9704/f1p0/2350	2349	N/A	GRMZM2G103214_P01	complete	300	6	Aquaporin-like;;Major intrinsic protein;;Aquaporin transporter	N/A	(TCACCC)n,(TGCCAC)n	0.214268
c10407/f1p1/5135	5135	N/A	GSMUA_Achr3P19000_001	complete	300	10	-;;Regulator of chromosome condensation, RCC1;;Regulator of chromosome condensation 1/beta-lactamase-inhibitor protein II	N/A	GA-rich	0
c27018/f1p0/1124	1148	N/A	LOC_Os03g56800.1	complete	300	5	-;;IMP dehydrogenase/GMP reductase;;Aldolase-type TIM barrel	N/A	none	2.52535
c44306/f1p1/2759	2759	1	LOC_Os11g08729.1	complete	300	N/A	N/A	N/A	ATHILA-3_SBi-I,Gypsy-127_SBi-I,Gypsy-136_SBi-I	0.620252
c13578/f1p0/5377	5412	N/A	Manes.06G040000.1.p	complete	300	6	-;;Reverse transcriptase domain	TCONS_00029225	Gypsy-134_ZM-I,Gypsy-77_SB-I	0.154059
c23052/f1p0/3252	3272	1	Pahal.C04409.1	complete	300	N/A	N/A	CNT0019222	DNA-5_SBi,STOWAWAY12_SB,Helitron-N11_SBi	0.17933
c19850/f1p0/3915	3944	N/A	Pavir.Ba03180.1.p	complete	300	2	-	N/A	Helitron-3_SBi,(ATTTT)n,(TCATCA)n	0.0413544
c5939/f1p0/3442	3445	1	Pavir.Db01889.8.p	complete	300	7	Protein kinase domain;;Serine/threonine-protein kinase, active site;;Protein kinase-like domain	CNT0024719	(A)n	0.26402
c6034/f1p0/2486	2422	1	Pavir.Ha00402.1.p	complete	300	5	-;;Protein kinase-like domain;;Serine-threonine/tyrosine-protein kinase catalytic domain	CNT0008539	(ATGT)n	0.409047
c13253/f1p1/2097	2115	1	Sevir.1G237900.1.p	5prime_partial	300	7	-;;Leucine-rich repeat domain, L domain-like;;Leucine-rich repeat	CNT0030537	none	0.32115
c19817/f1p0/3314	3325	1	Sevir.5G170400.1.p	complete	300	2	-	N/A	RLG_scTat_2_1-I,ATHILA-7_SBi-LTR	1.1443
c14282/f1p0/6556	6555	1	Sobic.001G353000.2.p	complete	300	8	Alpha/Beta hydrolase fold;;Serine carboxypeptidase, serine active site;;Peptidase S10, serine carboxypeptidase	CNT0017742	(GCGGCCA)n,(CTCCATT)n,(TATTGC)n,hAT-N3_SBi,L1-7_SBi,STOWAWAY14_SB,(TTTC)n	0.356276
c29040/f1p0/3554	3552	N/A	XP_013791604.1	complete	300	5	-;;FAD-binding, type 1;;Riboflavin synthase-like beta-barrel	N/A	(GCA)n,Gypsy-22_SB-I,(AGAG)n,(ATC)n,(TAT)n,(ATA)n	0
c33713/f1p1/3402	3399	1	GRMZM2G024247_P02	5prime_partial	303	1	-	CNT0001367	(TCTT)n,hAT-N17_SBi,hAT-N11_SBi	1.28436
c20794/f1p0/2632	2635	N/A	LOC_Os02g35820.1	complete	303	N/A	N/A	TCONS_00029225	(CGCC)n,(CTC)n,Gypsy-77_SB-I,Gypsy-79_SB-I	0.0780752
c10470/f1p0/1317	1338	N/A	Oropetium_20150105_14062A	complete	303	1	-	N/A	(GC)n	0.232667
c32725/f1p0/2402	2419	N/A	Pavir.J34663.1.p	5prime_partial	303	1	-	N/A	none	0.135018
c20436/f1p0/2778	2749	N/A	Pavir.J35326.2.p	complete	303	3	-;;Protein of unknown function DUF594	N/A	(GAAA)n,(A)n	0.249003
c12496/f1p0/1768	1705	N/A	Sobic.003G257400.1.p	complete	303	3	-;;Purine permease, plant	N/A	none	1.23984
c19135/f1p0/2396	2425	1	Sobic.005G110532.1.p	complete	303	N/A	N/A	CNT0029974	GA-rich	0.259347
c10746/f1p0/2490	2490	N/A	Sobic.010G224400.2.p	complete	303	N/A	N/A	N/A	(CCA)n	0.0242562
c27954/f1p0/3904	3902	1	Sobic.010G239700.2.p	complete	303	4	-;;Protein kinase-like domain	CNT0028475	none	0.261245
c24756/f1p0/4328	4328	N/A	30736	complete	306	6	Protein kinase-like domain;;Protein kinase domain	N/A	none	0
c25000/f1p0/1276	1276	N/A	ATMG00516.1	complete	306	1	NADH:ubiquinone oxidoreductase, subunit 1/F420H2 oxidoreductase subunit H	N/A	none	0.0157779
c25100/f1p0/2685	2578	1	GRMZM2G059285_P01	complete	306	6	Aldo/keto reductase;;NADP-dependent oxidoreductase domain	CNT0027783	none	0.167027
c38731/f1p0/7698	7695	1	LOC_Os11g39730.1	complete	306	N/A	N/A	CNT0026604	(CCA)n,(T)n	0.0104653
c17444/f1p0/4083	4034	N/A	Pavir.Ha00759.1.p	complete	306	N/A	N/A	CNT0026973	none	0
c17164/f1p0/3519	3518	N/A	Pavir.J04990.1.p	complete	306	6	Protein kinase domain;;Protein kinase-like domain	N/A	(ACC)n,GA-rich	0.0343365
c14371/f1p0/6373	6164	1	Sobic.004G073400.1.p	complete	306	5	-;;ABC transporter type 1, transmembrane domain	CNT0036270	DNA-5_SBi,RTE2_ZM,RTE-1_SBi	0
c16053/f1p0/5692	5617	1	Sobic.010G065300.1.p	complete	306	3	-;;P-loop containing nucleoside triphosphate hydrolase	CNT0017710	none	0.018267
c11787/f1p0/2640	2639	N/A	XP_002459644.1	5prime_partial	306	1	-	CNT0031320	GA-rich,LINE1-42_SBi,(TATT)n	0.183093
c38545/f1p0/1047	1047	N/A	Zm00008a001853_P01	complete	306	1	-	N/A	none	21.8586
c8202/f1p0/4026	3996	1	Brast05G257500.1.p	complete	309	5	AMP-dependent synthetase/ligase	N/A	(GCCCC)n	0.11279
c20193/f1p0/3604	3585	1	Glyma.14G067000.1.p	complete	309	1	-	CNT0041648	none	0.0906319
c3689/f1p0/2262	2261	N/A	GSMUA_Achr4P29160_001	complete	309	N/A	N/A	N/A	(CACCAG)n,(GCA)n	0
c9239/f1p0/2864	2864	N/A	Mapoly0069s0084.3.p	complete	309	3	Dynamin superfamily;;Dynamin-1-like protein;;Dynamin central domain	N/A	(AACGAA)n	0
c27547/f1p0/1284	1266	N/A	Oropetium_20150105_11127A	complete	309	N/A	N/A	N/A	none	1.28811
c10131/f1p0/2512	2347	1	Pahal.C03394.1	complete	309	3	-;;Ribonuclease H-like domain	CNT0028320	hAT-3_SBi	0.217774
c17179/f1p0/1466	1470	1	Pavir.Ea01484.1.p	complete	309	2	-	N/A	ENSPM-6_ZM	1.41065
c37840/f1p0/3524	3427	1	Sevir.1G239000.1.p	complete	309	N/A	N/A	CNT0030362	none	0.0897832
c7405/f1p0/6937	6853	1	Sobic.003G206250.1.p	complete	309	N/A	N/A	CNT0025436	A-rich,LINE1-13_SBi	0.102822
c42689/f1p1/2206	2204	1	Sobic.005G167700.2.p	5prime_partial	309	1	-	N/A	Helitron1_ZM	0.86698
c3886/f1p0/5322	5121	1	Sobic.006G193200.2.p	complete	309	3	-	N/A	G-rich,(G)n,(A)n	0.0878609
c12481/f1p0/4907	4907	1	Sobic.006G193200.2.p	complete	309	5	Periplasmic binding protein-like I;;Receptor, ligand binding region	N/A	none	0.0165182
c3095/f1p0/5979	5978	N/A	XP_013069785.1	complete	309	N/A	N/A	N/A	(CGA)n	0
c32864/f1p0/827	830	1	GRMZM2G044306_P03	3prime_partial	312	N/A	N/A	N/A	(GCG)n	3.58028
c35142/f1p0/1797	1797	N/A	KIN06428.1	complete	312	1	-	N/A	Gypsy-1_BDi-I	0
c6913/f1p0/5557	5557	N/A	mrna27940.1-v1.0-hybrid	complete	312	6	Peptidase C12, ubiquitin carboxyl-terminal hydrolase	N/A	(TCA)n,(CTCT)n	0
c24748/f2p2/783	782	1	NP_001151832.1	complete	312	3	-	N/A	(TA)n	167.767
c17303/f1p0/775	776	1	NP_001151832.1	complete	312	3	-	N/A	(TG)n,(AT)n	155.674
c36255/f1p0/1372	1425	1	Oropetium_20150105_04648A	complete	312	9	-;;Tetratricopeptide repeat;;Tetratricopeptide-like helical domain;;Tetratricopeptide repeat-containing domain	N/A	none	1.35275
c3235/f1p0/2362	2364	N/A	Pavir.Ga02687.1.p	complete	312	2	-	N/A	LINE1-61_SBi	0.0251866
c2602/f2p0/1489	1493	1	Pavir.Gb00511.1.p	complete	312	2	-	CNT0029829	none	1.61751
c24839/f1p0/4698	4421	1	Pavir.Ha01176.1.p	complete	312	N/A	N/A	CNT0025527	none	0.0687067
c17503/f1p1/2861	2865	1	Sobic.005G102900.1.p	3prime_partial	312	5	-;;NB-ARC;;P-loop containing nucleoside triphosphate hydrolase	N/A	(TCCCTC)n,(GGTGTT)n,G-rich	0.168699
c5542/f1p0/4153	4153	N/A	Brast07G146100.1.p	complete	315	5	-;;Alpha-factor-transporting ATPase;;ABC transporter-like;;P-loop containing nucleoside triphosphate hydrolase	N/A	none	0
c9580/f1p0/1580	1486	1	GRMZM2G069569_P01	complete	315	N/A	N/A	lincRNA33_PMID_24635777	none	0.277317
c33207/f1p0/2571	2569	N/A	LOC_Os04g10080.1	complete	315	N/A	N/A	N/A	ATHILA-3_SBi-I,Gypsy-125_SBi-I,GA-rich	0.0954905
c13278/f1p0/5979	5941	1	Sobic.001G272600.1.p	complete	315	N/A	N/A	N/A	(TGTCTTT)n	0.0169968
c19930/f1p0/1783	1780	N/A	Sobic.001G492700.1.p	3prime_partial	315	N/A	N/A	N/A	none	0.169657
c4464/f1p0/5143	4880	1	Sobic.004G073400.1.p	complete	315	N/A	N/A	CNT0036270	none	0.034045
c8654/f1p0/5426	5418	N/A	Sobic.005G061500.4.p	5prime_partial	315	1	-	N/A	(GTG)n	0.0756322
c32552/f1p0/1172	1169	N/A	Sobic.005G196100.1.p	5prime_partial	315	5	Major facilitator, sugar transporter-like;;Major facilitator superfamily domain	N/A	none	0.81526
c28207/f1p0/3938	3884	N/A	Sobic.005G220800.1.p	complete	315	N/A	N/A	N/A	none	0.0120697
c32440/f1p0/3739	3738	N/A	Zm00008a024700_P01	complete	315	1	-	N/A	none	0.122623
c15265/f1p0/1268	1268	N/A	213108	complete	318	7	-;;HAD-like domain;;HAD hydrolase, subfamily IA	N/A	none	0.0158775
c6330/f1p0/5488	5496	1	GRMZM2G158809_P01	complete	318	N/A	N/A	CNT0024616	none	0.131141
c15783/f1p0/2345	2337	1	Pavir.Da00040.1.p	complete	318	7	-;;Serine/threonine-protein kinase, active site;;Protein kinase-like domain;;Protein kinase domain	CNT0032252	(CA)n,(GA)n	0.0572915
c15726/f1p0/6251	6079	1	Pavir.Ib01401.1.p	complete	318	4	-;;Ribonuclease H-like domain;;HAT, C-terminal dimerisation domain	CNT0028320	(CG)n,(CGCGCGG)n,(TCGCTG)n,hAT-3_SBi,(CTG)n	0.221024
c23462/f1p1/2447	2460	1	Seita.9G148900.1.p	5prime_partial	318	1	-	N/A	LINE1-53_SBi,LINE1-50_SBi	0.301517
c18687/f1p0/1710	1672	1	Sobic.001G543100.15.p	complete	318	1	-	N/A	(T)n	0.820666
c7734/f1p0/3469	3552	1	Sobic.002G031400.1.p	complete	318	N/A	N/A	N/A	none	0.369707
c40705/f1p0/2388	2385	N/A	Sobic.002G243400.1.p	complete	318	2	-;;Cation/H+ exchanger, CPA1 family	N/A	none	0.168827
c29718/f1p0/2304	2435	1	Sobic.004G073400.1.p	5prime_partial	318	6	P-loop containing nucleoside triphosphate hydrolase;;ABC transporter-like	CNT0032096	none	0.0667019
c2643/f1p0/4285	4284	N/A	Sobic.004G166000.2.p	complete	318	N/A	N/A	N/A	L1-8_SBi,LINE1-29_ZM,LINE1-6_SBi,Gypsy33-ZM_I-int	0.247782
c14488/f1p0/1161	1161	N/A	Sobic.010G092550.1.p	5prime_partial	318	N/A	N/A	N/A	none	0.0520223
c12548/f1p0/5952	5953	N/A	XP_014279656.1	complete	318	N/A	N/A	N/A	(GATTTT)n,(TAT)n,(TTTA)n,(T)n	0
c33481/f1p2/3792	3792	N/A	Pahal.E01667.1	complete	321	N/A	N/A	N/A	GA-rich,LINE1-66_SBi	1.22493
c38550/f1p0/2305	2319	N/A	Pavir.Ha01408.1.p	complete	321	N/A	N/A	CNT0019739	Gypsy-123_SBi-LTR,DNA-5_SBi	0.363424
c14131/f1p0/3606	3619	1	Pavir.J01289.1.p	5prime_partial	321	5	UDP-glucuronosyl/UDP-glucosyltransferase	N/A	Copia12-ZM_LTR	0.135107
c39513/f1p0/2512	2499	1	Pavir.J10802.1.p	5prime_partial	321	1	-	CNT0027783	(TTATCTT)n	1.48149
c34537/f1p0/6127	6074	N/A	Pavir.J23358.1.p	complete	321	N/A	N/A	CNT0028714	A-rich,hAT2_SB	0
c20667/f1p0/2674	2678	N/A	Sobic.001G195600.1.p	complete	321	N/A	N/A	N/A	none	0.04248
c12915/f1p0/4118	3972	1	Sobic.002G115900.2.p	complete	321	6	START domain	N/A	Copia-10_SB-LTR,GA-rich	0.123052
c38824/f1p0/1433	1421	1	Sobic.002G227300.1.p	complete	321	1	-	N/A	(GGACGA)n,(A)n	2.11276
c11267/f1p0/2228	2258	N/A	Sobic.005G095620.1.p	5prime_partial	321	N/A	N/A	N/A	Helitron-N4_SBi	0.332969
c15034/f1p0/1537	1535	1	Sobic.008G176500.1.p	5prime_partial	321	1	-	N/A	none	0.195707
c25709/f1p0/1251	1253	N/A	XP_016765216.1	complete	321	1	-	N/A	none	0.160676
c10761/f1p0/5971	5993	1	Brast03G079700.1.p	complete	324	2	-	NONATHG000477.1	(CACCTC)n,L1-2_SBi,LINE1-65_SBi	0
c42342/f1p0/2634	2639	1	GRMZM2G121636_P01	complete	324	3	-	N/A	(GCCGCCG)n,LINE1-33_ZM,hAT-N15_ZM	0.46045
c8863/f1p0/1803	1808	N/A	Pahal.B02062.1	complete	324	3	-;;Domain of unknown function DUF588	N/A	(CGCCACG)n	0.267305
c11604/f1p0/1583	1580	N/A	Pahal.B02062.1	complete	324	3	-;;Domain of unknown function DUF588	N/A	(CGCCACG)n	3.00134
c17863/f1p0/2655	2527	1	Pavir.Fa02365.1.p	complete	324	1	-	N/A	(T)n	0.0644013
c10226/f1p0/1562	1589	1	Pavir.Fb00109.1.p	complete	324	1	-	N/A	(T)n	0
c21358/f1p0/3820	3791	1	Pavir.Gb01959.1.p	complete	324	9	-;;Pentatricopeptide repeat	N/A	none	0.159083
c8462/f1p0/6243	6206	1	Seita.8G114400.1.p	complete	324	N/A	N/A	NONATHG002735.1	Helitron1_ZM,Helitron2_ZM,Helitron-5_SBi,(A)n	0.110377
c28886/f1p0/3828	3482	1	Sevir.7G081300.3.p	complete	324	4	-;;Pentatricopeptide repeat	N/A	none	0.180763
c3009/f1p1/1460	1459	N/A	Sevir.7G337100.1.p	5prime_partial	324	N/A	N/A	N/A	none	1.2695
c29242/f1p0/4000	3997	N/A	Sobic.004G249000.1.p	complete	324	N/A	N/A	lincRNA509_PMID_24635777	(TATATTT)n,HARB-N15_SBi,Copia-62_BD-LTR,LINE1-49_SBi,HARB-N3_SBi	0
c11585/f1p0/3831	3812	1	Sobic.006G193200.2.p	complete	324	N/A	N/A	N/A	A-rich	0.0602104
c32708/f1p0/1364	1333	1	Sobic.008G004700.1.p	complete	324	3	-;;LRAT-like domain	N/A	(TTCAA)n	3.60968
c19008/f1p0/505	505	1	Zm00008a008061_P01	complete	324	2	-	N/A	none	0
c12790/f1p0/5428	5428	N/A	AT1G55860.2	complete	327	2	HECT domain	CNT0005738	none	0
c32844/f1p0/3297	3350	1	Bradi3g48790.1.p	complete	327	2	-	CNT0030537	(AT)n	0.114185
c5088/f1p0/1718	1719	N/A	DCAR_023665	complete	327	11	UBA-like;;XPC-binding domain;;Ubiquitin-associated domain;;UV excision repair protein Rad23	N/A	(GCCCCA)n	0.12883
c18768/f1p0/1338	1330	N/A	Seita.9G199100.1.p	3prime_partial	327	3	-	N/A	LINE1-54_SBi	0.090824
c26750/f1p0/2713	2704	1	Sevir.3G277200.1.p	complete	327	5	Glycoside hydrolase family 1;;Glycoside hydrolase superfamily;;Glycoside hydrolase, catalytic domain	CNT0031729	none	0.0893461
c32456/f1p6/1394	1394	1	Sevir.5G435400.2.p	complete	327	4	-;;Alpha/Beta hydrolase fold	CNT0023676	none	6.51808
c10364/f1p0/1850	1848	1	Sobic.001G067400.1.p	complete	327	2	Arv1 protein	CNT0019878	(CGGCGAC)n	0.359511
c25489/f1p0/4509	4388	1	Sobic.002G161400.1.p	complete	327	N/A	N/A	N/A	LINE1-31_SBi,Copia-34_SB-LTR	0
c23141/f1p0/2633	2590	1	Sobic.003G218700.1.p	complete	327	7	-;;Zinc finger, LSD1-type;;Ribosomal protein S27e, zinc-binding domain	N/A	none	0.365509
c9706/f1p0/15235	14924	1	Sobic.005G019600.5.p	complete	327	6	Leucine-rich repeat domain, L domain-like;;Leucine-rich repeat	CNT0020781	TSB2	0
c18468/f1p0/2286	2272	N/A	Sobic.005G071500.1.p	5prime_partial	327	4	-;;UDP-glucuronosyl/UDP-glucosyltransferase	CNT0025220	none	0.115196
c30352/f1p0/3882	3736	1	Sobic.005G156400.1.p	5prime_partial	327	N/A	N/A	CNT0029933	none	0.0432354
c6057/f1p0/7604	7479	1	Sobic.007G210500.1.p	complete	327	N/A	N/A	N/A	(CCAG)n	0
c36609/f1p0/5951	5772	1	Zm00008a015514_P01	complete	327	N/A	N/A	N/A	(CGCACA)n	0.0286887
c34289/f1p0/3149	3151	N/A	Aco015855.1	5prime_partial	330	5	-;;P-type ATPase, transmembrane domain;;P-type ATPase, A domain	CNT0019224	none	0
c19937/f1p0/3796	3795	1	ChrUn.fgenesh.mRNA.27	complete	330	N/A	N/A	lincRNA678_PMID_24635777	(CTCC)n,(CCT)n,Gypsy-92_SB-I	0.195615
c32969/f1p0/4170	4004	1	GRMZM2G071396_P01	complete	330	3	Leucine-rich repeat-containing N-terminal, plant-type	CNT0030362	(A)n	0.0854064
c19681/f1p0/4000	3634	1	GRMZM2G474777_P01	complete	330	4	Protein kinase-like domain	CNT0028450	none	0.147156
c12764/f1p1/2242	2236	1	GRMZM5G837526_P01	complete	330	2	Leucine-rich repeat domain, L domain-like	CNT0018141	hAT-3_SBi	0.916104
c28864/f1p0/4242	4326	1	LOC_Os02g05980.1	complete	330	2	-	CNT0028450	LINE1-14_SBi	0.277087
c16043/f1p0/2859	2931	1	Pahal.D02153.1	complete	330	1	-	N/A	none	0.41372
c23443/f1p0/1306	1302	1	Pavir.Fb01614.1.p	complete	330	N/A	N/A	N/A	RLG_scTat_2_1-I,ATHILA-7_SBi-LTR,Gypsy-127_SBi-LTR	0.851008
c6343/f1p0/2534	2534	N/A	Pavir.J11947.1.p	complete	330	2	-	N/A	none	0.246295
c24482/f1p0/2464	2458	1	Pavir.J20612.1.p	complete	330	6	Homeobox domain-like;;Homeobox domain	CNT0027787	(TTTA)n,Helitron-N10_SBi	0.534232
c17453/f1p0/3408	3408	N/A	Phvul.002G237200.1.p	complete	330	4	Armadillo-type fold;;Armadillo-like helical	N/A	(AGCGAT)n	0
c16135/f1p0/3892	3750	1	Sevir.8G253000.2.p	complete	330	7	Protein kinase domain;;Serine/threonine-protein kinase, active site;;Protein kinase-like domain	CNT0026835	none	0.435729
c3637/f1p0/5379	5449	1	Sobic.001G222700.1.p	complete	330	2	-	CNT0010248	none	0.0873511
c31004/f1p0/4461	4460	1	Sobic.003G306200.3.p	complete	330	2	Immunoglobulin-like fold;;Immunoglobulin-like domain	CNT0018538	LINE1-18_SBi,A-rich	0.378198
c38138/f1p0/5658	5514	1	Sobic.003G313300.4.p	complete	330	N/A	N/A	CNT0031986	none	0
c17599/f1p0/3280	2947	1	Sobic.008G052600.1.p	complete	330	5	-;;Protein kinase-like domain;;Protein kinase, ATP binding site	CNT0029164	(T)n	0.497173
c21528/f1p0/3592	3584	1	Cucsa.031240.1	complete	333	4	-	CNT0018902	Gypsy-41_SB-I	0.318967
c4890/f1p0/1352	1349	1	GRMZM2G069922_P03	3prime_partial	333	1	-	CNT0023148	none	3.01331
c7859/f1p0/5799	5858	N/A	LOC_Os02g24780.1	complete	333	2	-	N/A	Helitron-3_SBi,Helitron-1_BDi,(ATTTT)n,(TCATCA)n,DNA-3B_SBi	0.0580303
c10838/f1p0/1617	1616	1	Pahal.A01613.1	complete	333	2	Leucine-rich repeat domain, L domain-like	N/A	LINE1-47_SBi,HARB-N9_SBi	0.0251508
c17214/f1p0/2901	2847	1	Pavir.Ib01401.1.p	5prime_partial	333	N/A	N/A	TCONS_00063477	hAT-3_SBi	0.262957
c25345/f1p0/4536	4519	1	Pavir.J15157.1.p	complete	333	N/A	N/A	CNT0030362	none	0
c46067/f1p12/2490	2490	N/A	Seita.2G004200.1.p	complete	333	1	-	N/A	Copia-124_SB-LTR	3.82403
c2254/f3p12/2661	2660	N/A	Seita.2G004200.1.p	complete	333	1	-	N/A	Copia-124_SB-LTR	5.10337
c45363/f4p12/2653	2653	N/A	Seita.2G004200.1.p	complete	333	1	-	N/A	Copia-124_SB-LTR	10.3144
c32709/f1p0/3870	3660	1	Seita.8G179900.1.p	complete	333	4	Concanavalin A-like lectin/glucanase domain;;Protein kinase-like domain	CNT0026835	none	0.148725
c31487/f1p0/4258	3926	1	Sevir.1G239000.1.p	complete	333	N/A	N/A	CNT0030362	none	0.0691378
c5038/f1p0/2634	2614	N/A	Sobic.002G201100.2.p	complete	333	6	-;;ZF-HD homeobox protein, Cys/His-rich dimerisation domain	N/A	none	0.223354
c4729/f1p0/7986	7777	N/A	Sobic.006G107332.1.p	complete	333	3	Endonuclease/exonuclease/phosphatase	N/A	LINE1-67_SBi,TSB1,LINE1-52_SBi,A-rich,(A)n,(CTGGCCA)n	0.0153145
c39731/f1p0/2571	2581	N/A	Sobic.007G174000.1.p	3prime_partial	333	3	-;;Protein of unknown function DUF241, plant	CNT0026433	CINFUL2_I-int	0.390016
c3527/f1p0/789	789	N/A	Sobic.010G136900.1.p	5prime_partial	333	3	-;;ABC-2 type transporter	CNT0024387	none	1.5446
c22529/f1p0/4063	4062	1	Zm00008a039455_P01	complete	333	2	-	CNT0017319	L1-5_SBi	0.29738
c28120/f1p0/3495	3494	1	Bradi3g07775.1.p	complete	336	N/A	N/A	CNT0021025	none	0
c41415/f1p0/3460	3196	1	GRMZM2G062576_P01	complete	336	4	-;;Leucine-rich repeat domain, L domain-like	CNT0032650	none	0.0620359
c24039/f1p0/4166	4148	1	GRMZM2G082522_P01	complete	336	6	-;;Protein kinase domain;;Serine-threonine/tyrosine-protein kinase catalytic domain;;Protein kinase-like domain	CNT0025156	none	0.0250815
c4392/f1p0/2188	2233	1	GRMZM2G142037_P01	complete	336	7	Serine/threonine-protein kinase, active site;;Protein kinase-like domain;;Protein kinase domain	CNT0027209	none	0.270479
c10244/f1p0/2910	2908	1	GRMZM5G836341_P01	complete	336	N/A	N/A	N/A	Gypsy-115_SB-I	0.778487
c29137/f1p0/2517	2514	N/A	OAG10562.1	complete	336	2	-	N/A	none	0.280287
c19562/f1p1/2837	2832	1	Pavir.J06164.1.p	complete	336	3	-	N/A	(CCG)n,(CCTGCCG)n	4.88864
c10739/f1p0/4864	4698	1	Pavir.J33745.1.p	complete	336	6	-;;Leucine-rich repeat;;Leucine-rich repeat domain, L domain-like	CNT0030538	HARB-N1_SB,hAT-N18_SB	0.0264123
c16619/f1p0/5667	5639	N/A	Pp3s46_240V3.1.p	complete	336	4	Pre-ATP-grasp domain	N/A	none	0.0464133
c19183/f1p0/3178	3375	1	Sevir.1G239000.1.p	complete	336	5	-;;Leucine-rich repeat-containing N-terminal, plant-type;;Leucine-rich repeat domain, L domain-like	CNT0030362	none	0.664539
c5164/f1p0/1474	1438	N/A	Sobic.001G377050.1.p	5prime_partial	336	2	-	N/A	none	0.224007
c44396/f1p0/1987	1988	1	Sobic.005G037300.1.p	complete	336	N/A	N/A	CNT0021596	none	0.567117
c35716/f1p0/622	622	1	Sobic.007G161500.1.p	complete	336	3	-	N/A	(TA)n	7.73263
c9605/f1p0/3637	3622	1	Sobic.008G129900.1.p	complete	336	N/A	N/A	CNT0024047	(CCTGAG)n,(CGC)n	0.530799
c32386/f1p0/1981	1824	1	Sobic.009G164300.2.p	complete	336	2	-	N/A	none	1.17081
c21174/f1p0/2463	2458	1	LOC_Os07g22110.1	complete	339	N/A	N/A	N/A	ATHILA-7_SBi-I,ATHILA-4_SBi-I,(CCAAGGC)n,RLG_scTat_1_2-LTR	2.74459
c33785/f1p0/2255	2255	1	LOC_Os07g22110.1	complete	339	N/A	N/A	N/A	ATHILA-7_SBi-I,ATHILA-4_SBi-I,(CCAAGGC)n	0
c11759/f1p0/4863	5134	N/A	mrna10543.1-v1.0-hybrid	complete	339	N/A	N/A	CNT0018902	Gypsy-54_SB-I	0
c33467/f1p0/2253	2254	N/A	mrna28906.1-v1.0-hybrid	complete	339	N/A	N/A	CNT0024662	Gypsy-104_SB-I	0.223299
c13679/f1p0/3861	3833	1	Pavir.Aa02743.1.p	complete	339	4	-	CNT0018902	Gypsy-41_SB-I,(CCA)n	0.317684
c14441/f1p0/3641	3853	1	Pavir.Eb00491.1.p	complete	339	4	Leucine-rich repeat domain, L domain-like	CNT0032650	none	0.0870751
c24356/f1p0/2812	2810	N/A	Pavir.Eb01706.1.p	complete	339	2	Zinc finger, CCHC-type	N/A	(TGACGA)n,L1-13_BDi,(GATGAA)n,RLG_scDEL_6_1-LTR	1.01021
c11411/f1p0/1572	1562	1	Pavir.J39570.1.p	5prime_partial	339	1	-	N/A	none	0.962972
c12745/f1p0/8658	8858	1	Seita.1G232700.1.p	complete	339	2	-	CNT0030537	(T)n	0.0174075
c18516/f1p0/2765	2501	1	Seita.8G050400.1.p	complete	339	4	-;;Leucine-rich repeat domain, L domain-like	CNT0026835	none	0.236352
c27577/f1p0/3196	3179	N/A	Sobic.006G128700.1.p	5prime_partial	339	3	Rad21/Rec8-like protein, N-terminal	N/A	none	0.0337813
c28300/f1p1/1221	1232	1	Sobic.007G214300.3.p	complete	339	2	-	CNT0027924	none	0.653615
c37725/f1p0/4212	4055	1	Sobic.009G170200.1.p	complete	339	3	-	CNT0018223	(GCT)n	0.0261312
c14553/f1p0/9333	9281	1	Sobic.010G160700.1.p	complete	339	N/A	N/A	N/A	(T)n,G-rich,(A)n	0
c6729/f1p0/4067	4042	1	Tp57577_TGAC_v2_mRNA28250	complete	339	1	-	CNT0018902	Gypsy-40_SB-I,Gypsy-56_SB-I	0.0292414
c31420/f1p0/3261	3289	1	GSMUA_Achr5P19180_001	complete	342	5	Periplasmic binding protein-like I;;Receptor, ligand binding region	CNT0019489	none	0.600443
c23402/f1p0/1411	1412	1	Pavir.J04855.1.p	3prime_partial	342	1	-	N/A	EnSpm-16_SBi	3.01079
c3714/f1p0/3835	3645	1	Seita.1G093200.1.p	complete	342	1	-	N/A	none	0.0387101
c37273/f1p0/1768	1764	N/A	Sobic.004G230500.1.p	complete	342	N/A	N/A	N/A	none	0.376631
c38058/f1p1/2396	2394	1	Sobic.006G193200.2.p	complete	342	5	-;;Periplasmic binding protein-like I;;Receptor, ligand binding region	CNT0019489	none	0.646817
c16816/f1p0/1107	1107	N/A	Sobic.010G173300.3.p	5prime_partial	342	N/A	N/A	N/A	HAZEAN-1_SB	3.45293
c24349/f1p0/2515	2500	1	GRMZM2G066489_P03	complete	345	3	Periplasmic binding protein-like I	N/A	none	0.541
c34293/f1p0/2967	2976	1	Pahal.E01188.1	5prime_partial	345	2	-	N/A	(TTTTC)n,(T)n	0.208399
c17857/f1p0/1596	1595	1	Sobic.004G055000.1.p	complete	345	3	-	CNT0022607	(CCTCCG)n	0.752652
c4611/f1p0/5329	5324	N/A	Sobic.005G100400.1.p	complete	345	N/A	N/A	N/A	(CAT)n,STOWAWAY12_SB	0.139915
c37682/f1p0/1209	1210	1	Sobic.006G263800.1.p	complete	345	10	HAD-like domain;;HAD hydrolase, subfamily IA	CNT0000554	none	0.63763
c44551/f1p0/2440	2443	1	Sobic.007G091301.1.p	complete	345	1	-	N/A	ATHILA-7_SBi-I	0.139216
c14537/f1p0/3868	3823	1	Sobic.007G186700.3.p	complete	345	3	-	CNT0019607	LINE1-13_SBi	1.08238
c7664/f1p0/12737	12738	N/A	XP_007840734.1	complete	345	1	-	N/A	(TT)n	0
c37277/f1p0/1066	1066	1	Zm00008a027096_P01	5prime_partial	345	5	Aldolase-type TIM barrel;;KDPG/KHG aldolase	CNT0027295	none	0.377723
c21592/f1p0/3664	3664	N/A	Zosma75g00690.1	complete	345	2	-	N/A	GA-rich	0
c10573/f1p0/5681	5681	N/A	43561	complete	348	2	-	N/A	(CATGAT)n	0
c37891/f1p0/3749	3706	1	Bradi3g48790.1.p	complete	348	6	Leucine-rich repeat;;Leucine-rich repeat domain, L domain-like	CNT0020720	CLAUDIA1_TM	0.199767
c19895/f1p0/3659	3546	1	Bradi4g10998.1.p	5prime_partial	348	N/A	N/A	CNT0026835	none	0.440224
c4130/f1p0/1200	1155	1	Brast04G105400.1.p	complete	348	3	-	N/A	(GCGCGG)n	2.39304
c19940/f1p0/3543	3494	N/A	GRMZM2G411653_P01	complete	348	4	Leucine-rich repeat domain, L domain-like	N/A	(TCTCCC)n,LINE1-44_SBi	1.2595
c25117/f1p0/582	584	N/A	KXG35511.1	5prime_partial	348	1	-	N/A	none	1.93053
c19609/f1p0/2380	2381	1	mrna10543.1-v1.0-hybrid	complete	348	4	Chromo domain;;Chromo domain-like	CNT0019305	RLG_scReina_2_1-I	0.751173
c34136/f1p0/5257	5100	1	Sevir.5G365800.1.p	5prime_partial	348	1	-	CNT0031907	A-rich,(T)n,(A)n	0
c29537/f1p0/1276	1303	1	Sobic.001G298400.3.p	5prime_partial	348	3	-	N/A	(CCGCGTG)n,(GCG)n,(CCGCGG)n,(ACGCGC)n,(CGG)n	0.798813
c6258/f1p0/6388	6500	N/A	Sobic.004G139700.1.p	complete	348	7	Peptidase S10, serine carboxypeptidase;;Alpha/Beta hydrolase fold	N/A	none	0
c15873/f1p0/1521	1396	1	Sobic.006G146900.1.p	5prime_partial	348	3	-;;DYW domain	CNT0019301	(A)n	0.95183
c14457/f1p0/855	910	1	Sobic.008G065000.1.p	complete	348	4	-	CNT0022486	none	0.154866
c42441/f1p0/2865	2725	1	Sobic.010G241500.1.p	5prime_partial	348	4	Leucine-rich repeat domain, L domain-like	CNT0028450	LINE1-14_SBi	0.148802
c18229/f1p0/5879	5891	1	Tp57577_TGAC_v2_mRNA7919	complete	348	4	-	lincRNA325_PMID_24635777	L1-7_ZM,LINE1-70_SBi,L1-17_BDi	0.187964
c11025/f1p0/1228	1233	N/A	GRMZM2G158093_P01	3prime_partial	351	N/A	N/A	N/A	LINE1-7_SBi	0.130625
c29899/f1p0/3932	3902	1	Oropetium_20150105_22427A	complete	351	N/A	N/A	CNT0022477	none	0.121605
c34955/f1p0/2435	2374	1	Sobic.002G137100.1.p	complete	351	5	Serine-threonine/tyrosine-protein kinase catalytic domain;;Protein kinase-like domain	N/A	none	1.56988
c9493/f1p0/5048	5412	1	Sobic.004G089300.2.p	complete	351	2	ABC transporter A, ABCA	TCONS_00065783	(ATA)n	0.09146
c28805/f1p0/1505	1504	1	Sobic.005G139000.1.p	5prime_partial	351	4	-	TCONS_00046455	(GGCGCC)n,(GCA)n	0.281107
c25402/f1p1/594	594	1	Sobic.006G067500.1.p	5prime_partial	351	1	Metallo-dependent phosphatase-like	N/A	none	0.985687
c27614/f1p0/1492	1514	1	Zm00008a029080_P01	complete	351	N/A	N/A	CNT0018858	none	0.947076
c14023/f1p0/5816	5866	1	GRMZM2G062576_P01	complete	354	N/A	N/A	CNT0032650	none	0.0517546
c12956/f1p0/6116	6106	1	GRMZM2G092586_P01	complete	354	3	-;;Sec7, C-terminal	N/A	none	0
c41344/f1p0/2375	2362	1	GRMZM2G133716_P04	complete	354	3	-;;PIN domain	N/A	(GGAGCC)n,(CGCCAC)n	0.571079
c31564/f1p0/3587	3587	N/A	Pavir.J24211.1.p	complete	354	3	-	N/A	EnSpm-30_SBi,(TTCTT)n,(CCG)n	0.189612
c21813/f1p0/3588	3559	1	Seita.8G022800.1.p	complete	354	2	-;;Leucine-rich repeat domain, L domain-like	CNT0026835	none	0.136575
c26571/f1p0/3689	3780	N/A	Sevir.9G425400.1.p	complete	354	2	-	N/A	EnSpm-30_SBi,(CCG)n	0.203548
c18582/f1p0/2221	2232	1	Sobic.001G071250.1.p	complete	354	2	-	N/A	MUDR1N_SB	5.82147
c42058/f1p0/3169	3066	1	Sobic.003G185100.2.p	complete	354	5	Proton-dependent oligopeptide transporter family;;Major facilitator superfamily domain	N/A	(CGTCCA)n,(CGCCGT)n	0.409154
c24388/f1p0/2761	2779	1	Sobic.004G035100.1.p	complete	354	4	-;;NAD(P)-binding domain	CNT0006994	(A)n	0.482571
c8245/f1p0/5304	5388	1	Sobic.009G146500.1.p	complete	354	5	Glycoside hydrolase, family 35;;Galactose-binding domain-like	CNT0027809	none	0.0144303
c7099/f1p0/3739	3745	1	Sobic.009G170200.1.p	complete	354	N/A	N/A	N/A	(CTG)n	0.0108303
c7938/f1p0/2531	2530	N/A	XP_014254450.1	complete	354	N/A	N/A	N/A	(ATA)n	0
c7239/f1p0/1521	1518	1	Aqcoe6G012800.1.p	complete	357	8	Glutathione S-transferase, N-terminal;;Thioredoxin-like fold;;Glutathione S-transferase, C-terminal-like	N/A	none	0.411141
c23019/f1p0/4538	4382	1	Pavir.J39961.1.p	5prime_partial	357	N/A	N/A	CNT0030537	none	0.157404
c18340/f1p0/824	831	1	Sevir.9G020900.1.p	complete	357	2	-	N/A	none	0.557221
c7671/f1p1/1478	1477	1	Sobic.001G381900.3.p	5prime_partial	357	4	-	CNT0017848	TSB2	0.18107
c8383/f1p0/2860	2617	1	Sobic.004G035100.1.p	5prime_partial	357	N/A	N/A	N/A	none	0.336974
c20400/f1p0/2324	2330	1	Sobic.005G100400.1.p	complete	357	N/A	N/A	CNT0031743	none	0.745435
c12799/f1p0/2747	2746	N/A	Sobic.006G199601.1.p	complete	357	1	-	N/A	L1-11_BDi	0.285933
c34609/f1p0/2211	2212	1	Sobic.007G028700.2.p	complete	357	8	-;;Zinc finger, LSD1-type	N/A	none	0.68052
c2676/f1p0/3629	3685	1	Bradi3g05480.1.p	complete	360	N/A	N/A	N/A	none	0.253005
c31538/f1p0/1871	1871	N/A	DCAR_004045	5prime_partial	360	13	DnaJ domain;;DnaJ domain, conserved site	N/A	none	0.0107604
c13528/f1p0/5300	5300	N/A	KYG47974.1	complete	360	5	Thioesterase;;Alpha/Beta hydrolase fold	N/A	none	0.0227917
c26993/f1p0/1400	1410	1	Pahal.I01158.1	complete	360	6	TPMT family;;S-adenosyl-L-methionine-dependent methyltransferase	lincRNA704_PMID_24635777	STOWAWAY15_SB	4.24044
c28993/f1p0/1154	1154	1	Pavir.Ca02032.1.p	5prime_partial	360	5	NAD(P)-binding domain;;NAD-dependent epimerase/dehydratase	CNT0002028	none	39.2759
c11031/f1p0/1342	1282	N/A	Sobic.001G071700.1.p	5prime_partial	360	5	-;;Serine-threonine/tyrosine-protein kinase catalytic domain;;Protein kinase-like domain	CNT0019158	none	0.134447
c17478/f1p0/3892	3473	1	Sobic.007G087100.1.p	complete	360	7	Pentatricopeptide repeat	N/A	none	0.244167
c14620/f1p0/3719	3718	1	Sobic.008G029800.1.p	complete	360	N/A	N/A	N/A	(GCG)n,(TTTAT)n,LINE1-1_SBi	0.0541491
c10735/f1p0/1782	1784	1	Sobic.008G102000.1.p	5prime_partial	360	2	-	CNT0011567	Gypsy-12_SB-LTR	2.52674
c5210/f1p0/5738	5718	N/A	Sobic.010G074100.1.p	complete	360	N/A	N/A	N/A	none	0
c19751/f1p0/1591	1591	N/A	XP_016265294.1	complete	360	2	-	N/A	none	0.177157
c13160/f1p0/5963	5972	N/A	Zm00008a038975_P01	complete	360	3	-	lincRNA223_PMID_24635777	Gypsy-133_SBi-I	0.0749978
c8592/f1p0/3393	3396	1	GRMZM2G068316_P02	5prime_partial	363	2	-	CNT0019026	MuDR-9_ZM,RLG_scTat_4_1-I	0.954251
c33174/f1p0/2200	2201	N/A	Pavir.J10219.1.p	complete	363	3	-	N/A	EnSpm-29_SBi	0.748152
c30472/f1p0/3392	3392	1	Pavir.J10219.1.p	complete	363	3	-	TCONS_00096851	EnSpm-29_SBi	0.0724606
c33305/f1p0/3972	3984	N/A	Pavir.J16496.1.p	3prime_partial	363	2	-	CNT0019274	none	0.0555871
c27266/f1p0/2876	2861	1	Sevir.2G141100.3.p	complete	363	5	-;;Protein kinase-like domain;;Serine-threonine/tyrosine-protein kinase catalytic domain	N/A	none	0.892661
c16503/f1p0/2312	2312	1	Sevir.5G260100.2.p	complete	363	1	-	CNT0032095	(CT)n	1.79158
c31211/f1p0/3410	3422	1	Sevir.6G071300.1.p	complete	363	5	Leucine-rich repeat-containing N-terminal, plant-type;;Leucine-rich repeat domain, L domain-like	N/A	EnSpm-30_SBi,LINE1-38_SBi	0.178624
c8082/f1p0/2253	2344	1	Sevir.7G058100.1.p	complete	363	4	-;;Wall-associated receptor kinase, galacturonan-binding domain	CNT0029164	none	0.309947
c16945/f1p0/2621	2506	N/A	Sobic.001G071700.1.p	complete	363	1	-	CNT0029044	none	0.262526
c28916/f1p0/1467	1456	1	Sobic.001G298400.3.p	complete	363	3	-	N/A	(CA)n,(TCG)n,(GCCGCGT)n,(CCGCGG)n,(GCG)n	0.116244
c19520/f1p0/1029	1030	1	Sobic.008G133400.22.p	5prime_partial	363	N/A	N/A	N/A	none	1.12619
c30235/f1p0/821	821	1	Zm00008a001184_P01	complete	363	5	Rhodanese-like domain	N/A	(CGC)n	2.6341
c30243/f1p0/3516	3494	1	Bradi3g15593.2.p	complete	366	N/A	N/A	lincRNA666_PMID_24635777	(A)n	0.178624
c6140/f1p0/3616	3616	N/A	Cre01.g050150.t1.1	complete	366	5	-;;Aldolase-type TIM barrel;;NADH:flavin oxidoreductase/NADH oxidase, N-terminal	N/A	none	0
c3838/f4p2/1240	1248	1	GRMZM6G748721_P01	complete	366	3	Mpv17/PMP22	CNT0021931	(CAGCACT)n,(CCG)n	1.69041
c15917/f1p0/6044	6040	N/A	mrna06473.1-v1.0-hybrid	complete	366	N/A	N/A	N/A	LINE1-66_SBi,L1-7_ZM	0.126662
c15363/f1p0/5568	5568	N/A	mrna10543.1-v1.0-hybrid	complete	366	3	-;;Retrotransposon gag domain	CNT0024662	Gypsy-102_SB-I	0.263952
c3892/f1p0/2556	2569	1	Pavir.Ea01479.1.p	complete	366	N/A	N/A	N/A	MuDR-3_SBi	0.462369
c17553/f1p1/2286	2276	1	Pavir.Hb00017.1.p	complete	366	1	-	TCONS_00037554	LTR-1_SBi,L1-2_SBi,LINE1-65_SBi	0.9111
c36282/f1p0/1393	1405	1	Pavir.Ia04783.4.p	complete	366	5	Stress responsive alpha-beta barrel;;Dimeric alpha-beta barrel	CNT0031656	OLO24_SB	5.58032
c14052/f1p1/2287	2286	1	Sevir.9G376200.1.p	complete	366	5	-;;NAD(P)-binding domain;;3-beta hydroxysteroid dehydrogenase/isomerase	N/A	none	0.245995
c37601/f1p0/3161	3200	1	Sobic.002G161400.1.p	complete	366	1	-	N/A	BAGY1_HV_I-int	0.102567
c28956/f1p0/3460	3406	1	Sobic.003G288100.1.p	complete	366	5	-;;UDP-glucuronosyl/UDP-glucosyltransferase	N/A	(T)n	0
c29657/f1p0/1497	1504	N/A	Sobic.005G166200.2.p	complete	366	1	-	N/A	(CGC)n	0.120475
c10681/f1p0/5581	5540	1	Sobic.005G230200.1.p	complete	366	N/A	N/A	CNT0021037	(GCCGCCC)n,(TGG)n,HARB-10_SBi,(TC)n,Tourist1f_SB,Helitron-N15_SBi,(AATATTT)n	0.790702
c11405/f1p0/2497	2495	1	Sobic.006G001100.1.p	complete	366	4	ELMO domain	N/A	(CTCC)n,(AAAG)n,(CATCG)n	0.128398
c14243/f1p0/3938	3863	1	Sobic.006G193200.2.p	complete	366	9	-;;GPCR, family 3;;Receptor, ligand binding region;;Periplasmic binding protein-like I	N/A	none	0.293442
c2067/f1p0/8206	7888	N/A	Zm00008a006120_P01	complete	366	2	-	CNT0019038	HARB2_ZM,REP2_SB,LINE1-16_SBi,STOWAWAY2_ZM,STOWAWAY13_SB,RLG_scAngela_2_1-I,Copia-82_SB-LTR,Copia-141_SB-LTR	0.161322
c21792/f1p0/1162	1163	1	Zm00008a015331_P01	complete	366	8	-;;Forkhead-associated (FHA) domain;;SMAD/FHA domain	N/A	none	2.42353
c8323/f1p0/2095	2032	N/A	Brast02G367500.1.p	complete	369	4	-	N/A	none	3.96048
c41886/f1p0/2772	2756	1	GRMZM2G146731_P01	complete	369	N/A	N/A	GRMZM2G146731_T01	(TATT)n	0.115944
c3188/f1p0/2620	2620	N/A	LOC_Os10g31250.1	complete	369	3	-;;Domain of unknown function DUF4220	N/A	none	0.0153684
c33964/f1p0/3282	3278	1	Pavir.Ga00792.3.p	complete	369	5	-;;Receptor, ligand binding region;;Periplasmic binding protein-like I	CNT0019489	STOWAWAY11_SB	0.666256
c6423/f1p0/5111	5117	1	Pavir.J09070.1.p	complete	369	2	WD40/YVTN repeat-like-containing domain;;WD40-repeat-containing domain	CNT0026793	GA-rich,Helitron-N13_SBi	0.0412965
c26947/f1p0/1125	1088	1	Sobic.001G289500.1.p	complete	369	5	Carbohydrate/puine kinase, PfkB, conserved site;;Ribokinase-like	N/A	none	0.130493
c5367/f1p0/1798	1865	1	Sobic.001G308200.1.p	5prime_partial	369	5	-;;Cytochrome P450	TCONS_00012924	(GCG)n	1.39729
c24909/f1p0/3549	3544	1	Sobic.002G161400.1.p	complete	369	5	-;;P-loop containing nucleoside triphosphate hydrolase	N/A	none	0.286942
c14015/f1p0/2974	2954	N/A	Sobic.009G222100.1.p	complete	369	3	-	N/A	none	0.0138512
c24990/f1p0/2541	2541	N/A	Vocar.0002s0677.1.p	complete	369	10	V-ATPase proteolipid subunit C-like domain;;V-ATPase proteolipid subunit;;V-ATPase proteolipid subunit C, eukaryotic	CNT0012135	none	0
c34336/f1p0/3843	3842	N/A	XP_003838231.1	complete	369	N/A	N/A	N/A	none	0.0471613
c22124/f1p0/3649	3647	1	Brast01G201400.1.p	complete	372	7	Translation protein, beta-barrel domain;;Translation elongation factor EFTu-like, domain 2	N/A	none	0.0110407
c40593/f1p0/3667	3623	1	GRMZM2G474777_P01	5prime_partial	372	N/A	N/A	CNT0028450	none	0.181631
c3839/f1p0/1369	1369	N/A	OAG10379.1	complete	372	1	-	N/A	(CACT)n,(AC)n,(GCAA)n,(CAAT)n	0.0147061
c9120/f1p0/1288	1284	1	Pavir.Aa02618.1.p	complete	372	N/A	N/A	N/A	none	1.48203
c2827/f1p0/5707	5709	N/A	Seita.8G054800.3.p	complete	372	2	Leucine-rich repeat domain, L domain-like	N/A	(GGCCGCA)n	0.0146103
c29793/f1p0/3965	3831	1	Sobic.001G499100.1.p	complete	372	6	-;;ABC transporter-like;;P-loop containing nucleoside triphosphate hydrolase	N/A	(TTTCT)n	0.279425
c24770/f1p0/3001	2740	1	Sobic.002G249700.1.p	5prime_partial	372	1	-	lincRNA179_PMID_24635777	none	0.247958
c12457/f1p0/4325	4624	1	Sobic.005G110532.1.p	complete	372	N/A	N/A	CNT0029933	(T)n	0.191113
c4422/f1p0/3700	3619	1	Sobic.006G195800.1.p	complete	372	3	-	CNT0029359	RLG_scIvana_6_1-LTR,GA-rich	0.32982
c33466/f1p0/3087	3129	1	Brast04G092100.1.p	5prime_partial	375	1	-	N/A	none	0.398534
c20521/f1p0/2266	2266	N/A	Cre12.g557750.t1.1	complete	375	3	-;;Diacylglycerol acyltransferase	N/A	none	0
c7567/f1p0/1696	1690	1	GRMZM2G137816_P03	complete	375	4	-;;Uncharacterised protein family Ycf36	N/A	none	0.0377021
c26661/f1p0/2998	2889	1	Oropetium_20150105_08778A	complete	375	N/A	N/A	N/A	(T)n	0.0139375
c16871/f1p0/2521	2402	1	Oropetium_20150105_15981A	complete	375	4	-;;Membrane attack complex component/perforin (MACPF) domain	CNT0017822	(CTCCGAC)n,(A)n	0.417708
c35191/f1p1/3484	3489	1	Pavir.Ba02670.1.p	complete	375	2	-	CNT0030738	(TCC)n,STOWAWAY3_SB,ZhAT5_ZM,(GCGGATC)n	0.324423
c2003/f1p0/5740	5740	N/A	Potri.013G100400.1	complete	375	5	Peptidoglycan binding-like	N/A	(T)n,(TGTGGC)n,(ATA)n,(TTA)n	0
c15981/f1p0/726	725	1	Seita.9G262200.2.p	3prime_partial	375	2	-;;Exocyst complex component EXOC6/Sec15	N/A	(GA)n	0.0292346
c4715/f1p0/967	966	N/A	Sobic.001G167600.1.p	complete	375	1	-	N/A	none	0.882309
c33100/f1p1/1531	1531	1	Sobic.001G485100.1.p	5prime_partial	375	1	-	CNT0010443	(CCG)n,(CGCCC)n	11.6729
c9634/f1p0/4121	4120	1	Sobic.004G316500.4.p	complete	375	4	-;;Nuclear transcription factor Y subunit A	CNT0012326	none	1.02618
c13676/f1p0/2304	2302	1	Sobic.009G212000.1.p	complete	375	2	-	N/A	none	0.983692
c11215/f1p0/2841	2841	N/A	Tp57577_TGAC_v2_mRNA22121	complete	375	9	-;;Helicase, C-terminal;;P-loop containing nucleoside triphosphate hydrolase	N/A	none	0.0212594
c30840/f1p0/4430	4019	1	Pavir.Ha00402.1.p	complete	378	N/A	N/A	CNT0018911	(ATGT)n	0.0586005
c4313/f1p0/1695	1659	1	Sobic.001G251900.1.p	5prime_partial	378	5	Exonuclease, RNase T/DNA polymerase III;;Ribonuclease H-like domain	lincRNA499_PMID_24635777	none	1.45087
c28454/f1p0/11724	11706	1	Sobic.001G430700.2.p	complete	378	1	-	N/A	(A)n,(AGACACGC)n	0
c29212/f1p0/3645	3646	1	Sobic.002G161400.1.p	complete	378	6	-;;P-loop containing nucleoside triphosphate hydrolase	N/A	none	0.88929
c2509/f1p1/1599	1597	1	Sobic.004G353700.1.p	complete	378	4	-;;Protein of unknown function DUF789	N/A	(ATT)n,(CTT)n,GA-rich	4.99219
c18641/f1p0/3290	3357	1	Sobic.010G096300.1.p	complete	378	4	-;;Homeobox domain-like	CNT0028970	(CCTCCG)n,(CCG)n,RLG_scTat_2_1-I,ATHILA-7_SBi-LTR,Gypsy-127_SBi-LTR	0.397614
c21289/f1p0/1668	1670	1	Zm00008a013408_P01	complete	378	5	Histone deacetylase domain;;Histone deacetylase superfamily	CNT0015359	Gypsy-199_ZM-I	2.32232
c37515/f1p0/1332	1349	1	AC203366.4_FGP001	complete	381	1	-	N/A	(TGGAGG)n	0.326908
c35237/f1p2/1877	1893	1	Pavir.Hb01644.1.p	complete	381	5	-;;Protein of unknown function DUF594	N/A	(T)n	0.6149
c12988/f1p0/5079	5252	1	Sevir.3G238800.1.p	complete	381	4	Galactose-binding domain-like;;Glycoside hydrolase, family 35	CNT0027809	none	0.0490523
c37895/f1p0/1762	1760	N/A	Sobic.003G242800.2.p	complete	381	2	-	N/A	(AC)n,(GCAGCG)n	0.178023
c38942/f1p0/2306	2307	1	Sobic.009G138401.1.p	complete	381	2	-	N/A	none	1.35265
c39123/f1p0/2401	2413	1	Sobic.010G046700.1.p	complete	381	2	-	N/A	hAT-N2_SBi	0.0169279
c14173/f1p0/7563	7445	1	Zm00008a037167_P01	complete	381	7	-;;Pentatricopeptide repeat	N/A	(T)n	0.08398
c35774/f1p0/2400	2547	1	GRMZM2G036007_P01	complete	384	1	-	CNT0018858	none	0.372474
c27671/f1p0/1458	1506	1	GRMZM2G080546_P02	complete	384	N/A	N/A	N/A	none	0.241104
c5916/f1p0/1023	1021	N/A	LOC_Os07g22110.1	complete	384	N/A	N/A	N/A	ATHILA-7_SBi-I	3.34552
c11133/f1p0/2587	2587	N/A	Pahal.I04538.1	complete	384	11	Heat shock protein 70, conserved site;;Heat shock protein 70kD, peptide-binding domain;;Heat shock protein 70 family	CNT0004633	none	0.108951
c14993/f1p0/1300	1296	1	Pavir.J04001.1.p	complete	384	1	-	CNT0024905	LINE1-28_SBi,LINE1-65_SBi	3.05707
c19722/f1p0/1090	1093	1	Pavir.J31736.1.p	5prime_partial	384	5	P-loop containing nucleoside triphosphate hydrolase;;DNA helicase	lincRNA544_PMID_24635777	Helitron-5_ZM	0.0894362
c29541/f1p0/3547	3365	1	Sevir.1G237900.1.p	complete	384	7	-;;Protein kinase domain;;Serine/threonine-protein kinase, active site;;Protein kinase-like domain	CNT0030362	none	0.162955
c25788/f1p0/3946	3767	1	Sobic.004G322600.1.p	complete	384	N/A	N/A	N/A	(CGACC)n,(TCC)n	0.0534697
c22449/f1p0/3534	3764	1	Sobic.006G193200.2.p	complete	384	3	Periplasmic binding protein-like I	N/A	none	0.0538041
c8331/f2p0/1212	1211	N/A	Sobic.006G193700.1.p	complete	384	4	-;;Zf-FLZ domain	N/A	(CGCT)n,(CAC)n	3.15871
c17455/f1p0/2983	2956	1	Sobic.006G199601.1.p	complete	384	2	-	N/A	none	1.01212
c36538/f1p0/594	594	N/A	Sobic.007G100500.1.p	5prime_partial	384	4	-;;Pentatricopeptide repeat	N/A	none	5.084
c6369/f1p0/1201	1201	1	Sobic.007G146900.1.p	complete	384	2	-	N/A	none	0.147616
c18908/f1p0/730	730	1	Sobic.007G161500.1.p	complete	384	2	-	CNT0035178	(TA)n	138.856
c16192/f1p0/730	730	1	Sobic.007G161500.1.p	complete	384	2	-	CNT0035178	none	103.574
c10540/f2p0/3655	3655	N/A	Sobic.008G155800.2.p	complete	384	10	-;;Ankyrin repeat;;Ankyrin repeat-containing domain	N/A	none	0.0275412
c3991/f1p0/2533	2515	1	Zm00008a031147_P01	complete	384	9	Aldo/keto reductase;;Aldo/keto reductase, conserved site;;NADP-dependent oxidoreductase domain	CNT0027783	(CTTTTGT)n	0.765029
c23469/f1p0/2266	2264	N/A	64171	complete	387	4	ATP synthase, alpha subunit, C-terminal	lincRNA430_PMID_24635777	none	0.017785
c24824/f1p0/7576	7422	N/A	Cucsa.249330.1	complete	387	5	Aspartic peptidase domain	N/A	(T)n,Gypsy-17_SB-I	0
c26426/f1p0/2039	2057	N/A	GRMZM2G099023_P01	complete	387	4	-	N/A	G-rich,(GCG)n	2.33535
c11781/f1p0/1101	1108	1	GRMZM2G138624_P01	5prime_partial	387	5	Isochorismatase-like	N/A	none	1.00956
c32152/f1p0/3574	3573	N/A	KOS23013.1	complete	387	1	-	N/A	(CGA)n,GA-rich,(TTCT)n	0
c40994/f1p0/2468	2469	1	Lus10015524	5prime_partial	387	1	-	CNT0020245	none	1.21169
c9727/f1p0/6469	6464	1	Pavir.J32370.1.p	complete	387	N/A	N/A	N/A	(AT)n,STOWAWAY3_SB	0
c32297/f1p0/3433	3585	1	Pavir.J33745.1.p	complete	387	2	Leucine-rich repeat domain, L domain-like	CNT0030362	none	0.141532
c2473/f1p0/5848	5710	1	Seita.4G201500.1.p	complete	387	1	P-loop containing nucleoside triphosphate hydrolase	N/A	none	0
c5343/f1p0/3292	3306	1	Sevir.1G237900.1.p	5prime_partial	387	3	-;;Leucine-rich repeat-containing N-terminal, plant-type	CNT0030537	none	0.168501
c25792/f1p0/3813	3839	1	Sevir.1G239000.1.p	5prime_partial	387	4	Leucine-rich repeat-containing N-terminal, plant-type	CNT0030362	(AGAC)n,(A)n	0.227368
c20889/f1p0/3115	3115	N/A	Sobic.002G265700.2.p	5prime_partial	387	N/A	N/A	N/A	LINE1-13_SBi	0.0193894
c20114/f1p1/2974	2978	1	Sobic.003G306200.3.p	complete	387	1	Immunoglobulin-like fold	CNT0018539	(T)n,LINE1-18_SBi,A-rich	1.17727
c37454/f1p0/1237	1239	1	Solyc07g045030.2.1	complete	387	1	-	CNT0039511	none	0.0324982
c16797/f1p0/3619	3656	N/A	Thhalv10012415m	complete	387	6	-;;FAD/NAD(P)-binding domain	CNT0036747	none	0.148682
c31432/f1p0/3937	3948	1	Cucsa.031240.1	complete	390	6	-;;Reverse transcriptase domain	CNT0018902	Gypsy-41_SB-I,(CCA)n,A-rich	0.420606
c30028/f1p2/1282	1283	1	KXG24199.1	3prime_partial	390	1	-	N/A	none	1.86446
c25574/f1p0/1641	1638	1	Pahal.F01718.1	complete	390	5	UDP-glucuronosyl/UDP-glucosyltransferase	N/A	(CAC)n,(GCCGCGC)n,(GAC)n	2.64324
c39578/f1p0/2524	2514	N/A	Pahal.H01976.1	complete	390	1	-	N/A	none	0.011446
c7903/f1p0/1673	1658	N/A	Pavir.Cb01773.1.p	complete	390	1	-	N/A	none	0.40071
c9463/f1p0/1234	1236	1	Pavir.J17894.1.p	complete	390	2	-	N/A	none	0.879582
c2713/f1p0/5231	5231	N/A	Pp3c11_20920V3.1.p	complete	390	5	Protein kinase-like domain;;Protein kinase domain	N/A	none	0
c31959/f1p0/2155	2170	1	Seita.7G062700.2.p	complete	390	N/A	N/A	CNT0029164	none	0.213435
c42234/f1p0/2597	2427	1	Sobic.002G137100.1.p	complete	390	5	Serine-threonine/tyrosine-protein kinase catalytic domain;;Protein kinase-like domain	N/A	none	0.0251631
c18690/f1p0/699	698	1	Sobic.003G246600.1.p	5prime_partial	390	6	-;;Ribosomal protein L6, chloroplast	N/A	none	0.288433
c27501/f1p0/6972	6880	N/A	Sobic.004G332100.1.p	complete	390	5	-;;Histone H5	CNT0006994	(T)n,(CGCC)n,(GTTTT)n,(TTTCTTC)n,A-rich,(A)n	0
c20664/f1p0/3379	3371	N/A	Sobic.005G110556.1.p	complete	390	2	-	N/A	(GGCTCC)n,L1-7_ZM,LINE1-36_SBi	0.143335
c37474/f1p0/1139	1139	1	Sobic.006G151001.1.p	complete	390	5	-;;PsbQ-like domain;;Oxygen-evolving enhancer protein 3	N/A	none	4.27797
c32712/f1p0/4420	4423	1	Sobic.008G028700.1.p	complete	390	N/A	N/A	CNT0017422	none	0.201252
c9627/f1p0/5711	5709	N/A	Sphfalx0067s0112.2.p	complete	390	5	GAF domain-like;;Phytochrome chromophore attachment domain	N/A	none	0.0105794
c25171/f1p0/3691	3445	1	Zm00008a037167_P01	complete	390	2	-	N/A	none	0.108095
c21215/f1p0/2440	2436	1	GRMZM2G032218_P02	complete	393	5	ABC transporter type 1, transmembrane domain	CNT0029359	GA-rich	0.0287863
c36145/f1p0/4668	4625	1	GRMZM2G177570_P01	complete	393	3	Leucine-rich repeat domain, L domain-like	CNT0028450	A-rich,(AT)n	0
c2818/f1p0/2672	2672	N/A	LOC_Os11g05030.1	complete	393	3	-;;Reverse transcriptase zinc-binding domain	lincRNA464_PMID_24635777	LINE1-38_SBi	0.045208
c1792/f1p0/5394	5383	1	Pahal.G02282.2	complete	393	1	Aspartic peptidase, active site	N/A	(GAATA)n,(CT)n,LINE1-13_SBi	0.245643
c19528/f1p0/2266	2267	N/A	Pavir.Gb02052.1.p	complete	393	2	-	CNT0010571	LINE1-34_SBi	0.150973
c42843/f1p0/2529	2526	N/A	Pavir.J36111.1.p	complete	393	N/A	N/A	N/A	MuDR-10_SBi	0.127523
c17750/f1p0/2983	2958	N/A	Seita.1G158100.2.p	complete	393	7	Pentatricopeptide repeat	N/A	(A)n	0.0220243
c7056/f1p2/1508	1511	1	Sevir.3G171400.1.p	complete	393	3	-;;Myb/SANT-like domain	CNT0030524	(TCCG)n,HARB-6_SBi	0.514138
c35195/f1p1/2193	2175	1	Sobic.001G425400.1.p	complete	393	5	Fructose-1,6-bisphosphatase class 1;;Fructose-1,6-bisphosphatase, active site	N/A	(T)n,STOWAWAY12_SB	2.36462
c19506/f1p0/2346	2268	1	Sobic.003G284800.1.p	5prime_partial	393	2	-	CNT0018738	none	0.743335
c41562/f1p1/2802	2802	1	Sobic.004G026900.1.p	complete	393	3	-;;Ubiquitin-conjugating enzyme/RWD-like	CNT0018907	ZhAT5_ZM,EnSpm-16_SBi	0.547158
c29514/f1p0/2452	2448	1	Sobic.004G026900.1.p	complete	393	3	-;;Ubiquitin-conjugating enzyme/RWD-like	N/A	none	1.17648
c9614/f1p0/5187	4783	1	Sobic.004G073400.1.p	complete	393	5	-;;P-loop containing nucleoside triphosphate hydrolase;;ABC transporter-like	CNT0019204	none	0.0641066
c9343/f1p0/1067	1066	1	Sobic.004G212000.1.p	5prime_partial	393	9	-;;CRC domain;;AWS domain;;SET domain	N/A	none	4.99519
c30611/f1p0/4949	4868	1	Sobic.005G098501.1.p	complete	393	N/A	N/A	N/A	(CA)n	0
c3453/f1p0/1022	1022	1	Sobic.006G186500.1.p	5prime_partial	393	3	S-type anion channel;;Voltage-dependent anion channel	N/A	none	1.23704
c3611/f1p0/3569	3657	1	Sobic.006G239900.1.p	complete	393	5	Leucine-rich repeat domain, L domain-like	N/A	none	0.289268
c29554/f1p0/1163	1164	1	XP_002451363.1	3prime_partial	393	2	-	N/A	none	2.82432
c29828/f1p0/4335	4215	1	GRMZM2G177570_P01	complete	396	1	-	CNT0028450	LINE1-14_SBi,(ACCACCC)n	0
c41426/f1p0/2502	2475	1	GRMZM2G325350_P01	complete	396	1	-	lincRNA627_PMID_24635777	(GCA)n,hAT-N1_SB,EnSpm-16_SBi,Tourist1c_SB,(CTCATC)n	0.0803064
c31711/f1p0/1143	1129	1	Pahal.C04670.1	complete	396	5	BURP domain	N/A	none	3.41049
c32793/f1p0/4293	4152	1	Pahal.D02425.1	complete	396	3	-	CNT0020413	none	0.102177
c21374/f1p0/2606	2408	1	Pavir.J23647.1.p	complete	396	5	-;;Zinc finger, SWIM-type;;Zinc finger, PMZ-type	CNT0032614	A-rich,MuDR-15_SBi,MuDR-16_SBi	4.33347
c20270/f1p2/1448	1449	1	Sevir.2G023000.3.p	5prime_partial	396	2	-	TCONS_00063399	Gypsy-16_SB-LTR	0.4706
c38261/f1p0/1382	1447	1	Sobic.001G096800.1.p	complete	396	3	-;;Uncharacterised protein family UPF0114	N/A	none	0.112102
c30675/f1p0/4034	4228	1	Sobic.002G272100.1.p	5prime_partial	396	1	-	CNT0020227	(GC)n	0.386781
c4293/f1p0/2679	2679	1	Sobic.005G175600.1.p	complete	396	1	Gnk2-homologous domain	CNT0018911	(C)n	0.218276
c38815/f1p0/2150	2152	N/A	Zm00008a000132_P01	complete	396	10	Pentatricopeptide repeat	N/A	L1-7_ZM,LINE1-45_SBi	0.130974
c24875/f1p0/3443	3461	1	Brast01G079800.1.p	complete	399	3	Protein of unknown function DUF3615	CNT0018271	STOWAWAY1_SB	1.20412
c6464/f1p0/2356	2355	1	GRMZM2G108418_P01	5prime_partial	399	1	-	CNT0021039	(CT)n,(TG)n	0.663289
c8488/f1p0/26595	26751	1	MDP0000248462	complete	399	N/A	N/A	CNT0032108	(CCAC)n,A-rich,(CG)n,(AACGAAT)n,(AATAT)n	0
c23431/f2p0/2850	2849	N/A	Pahal.G00151.1	complete	399	1	-	N/A	(CCAG)n,REP1_SB	0
c31110/f1p0/2756	2759	1	Pahal.I01553.1	complete	399	3	-	N/A	MuDR-16_SBi,MuDR2_ZM,GA-rich	0.0145942
c6078/f1p0/3185	3374	N/A	Pahal.J00752.1	complete	399	8	-;;Zinc finger, CCHC-type	N/A	LINE1-59_SBi	0.254001
c30334/f1p0/4213	4216	1	Pavir.Ib01401.1.p	complete	399	4	Ribonuclease H-like domain;;HAT, C-terminal dimerisation domain	TCONS_00063477	(T)n,hAT-3_SBi	2.34473
c10187/f1p0/5387	5349	1	Pavir.J10708.1.p	complete	399	N/A	N/A	CNT0018250	Copia-69_SB-LTR,Copia14-ZM_LTR,GA-rich,Gypsy-126_SBi-LTR	0.0474434
c7767/f2p0/3505	3505	1	Sobic.006G241700.4.p	complete	399	2	Wall-associated receptor kinase, galacturonan-binding domain	N/A	(GCTCCA)n,EnSpm1_SB,(TTAATTT)n	1.44863
c36526/f1p0/3489	3472	1	Sobic.006G241700.4.p	complete	399	2	Wall-associated receptor kinase, galacturonan-binding domain	N/A	(GCTCCA)n,EnSpm1_SB,(TTAATTT)n	0.292761
c18807/f1p0/4446	4218	1	Sobic.006G241700.4.p	complete	399	2	-;;Wall-associated receptor kinase, galacturonan-binding domain	N/A	none	0.0230697
c30040/f1p0/2404	2395	1	Sobic.007G099966.1.p	complete	399	N/A	N/A	N/A	(ATAG)n	0.201626
c6339/f1p0/6437	6375	1	GRMZM2G032942_P01	5prime_partial	402	N/A	N/A	CNT0030097	(CTC)n,(TTAC)n	0.394758
c29602/f1p0/5290	5189	1	GRMZM2G167049_P01	complete	402	3	-	CNT0026765	RLG_scDEL_2_2-I,A-rich	0
c7497/f1p0/2192	2191	1	LOC_Os02g06210.1	complete	402	3	-;;Reverse transcriptase zinc-binding domain	N/A	(AATGAA)n	0.28562
c18949/f1p1/1470	1454	1	Seita.7G062700.1.p	complete	402	3	Wall-associated receptor kinase, galacturonan-binding domain	CNT0029164	none	0.618104
c17300/f1p1/2443	2439	1	Seita.8G194800.1.p	complete	402	5	Concanavalin A-like lectin/glucanase domain;;Legume lectin domain	CNT0032002	(AATG)n	0.664108
c20699/f1p0/1525	1525	1	Sobic.001G096800.1.p	complete	402	3	-;;Uncharacterised protein family UPF0114	N/A	none	5.78936
c11523/f1p0/1924	1919	1	Sobic.001G472400.2.p	complete	402	4	-;;Armadillo-like helical;;Armadillo-type fold	N/A	none	5.46228
c7084/f1p1/1363	1363	1	Sobic.010G013700.1.p	5prime_partial	402	2	-	N/A	(CCG)n,(CGG)n	0.408807
c21900/f1p0/1526	1508	1	Zm00008a029177_P01	5prime_partial	402	N/A	N/A	N/A	none	1.44587
c34348/f1p0/2390	2390	N/A	Cre02.g115900.t1.2	complete	405	5	-;;Tryptophan RNA-binding attenuator protein-like domain;;Mitochondrial biogenesis protein AIM24	N/A	none	0
c28011/f1p0/4485	4496	1	GRMZM2G066489_P03	complete	405	3	-;;Periplasmic binding protein-like I	N/A	none	0.0893106
c10384/f1p0/3934	3883	1	LOC_Os02g07810.1	complete	405	N/A	N/A	N/A	(TC)n,Tourist1f_SB,(TTTATA)n	0
c28429/f1p0/3738	3740	N/A	OAG15096.1	complete	405	2	-;;Frequency clock protein	N/A	none	0.091512
c24915/f1p0/6150	5842	N/A	Pahal.H00123.1	complete	405	1	-	N/A	Copia-124_SB-LTR,(CT)n	0.153118
c20959/f1p0/4403	4007	1	Pavir.Ib01503.2.p	complete	405	4	-	CNT0017692	(CCG)n	0.190058
c40830/f1p0/2505	2508	N/A	Pp3s42_140V3.1.p	complete	405	6	-;;Haem peroxidase;;Haem peroxidase, plant/fungal/bacterial;;Catalase-peroxidase haem	N/A	none	0.0160547
c23233/f1p0/1279	1281	1	Seita.1G321800.1.p	complete	405	3	-;;Transcription termination factor, mitochondrial/chloroplastic	N/A	none	0.379603
c29946/f1p1/1040	1040	1	Seita.9G107800.1.p	complete	405	3	Peroxiredoxin-like FAM213/AAED1	CNT0003027	(GTTCGTT)n	11.812
c41907/f1p0/2380	2378	N/A	Sobic.003G242200.3.p	complete	405	N/A	N/A	CNT0019625	none	0.696533
c19748/f1p0/3499	3483	N/A	Sobic.006G030300.1.p	complete	405	7	-;;Protein kinase domain;;Serine/threonine-protein kinase, active site;;Protein kinase-like domain	CNT0029732	(AC)n	0.175976
c19854/f1p0/1307	1316	N/A	Zm00008a023115_P01	complete	405	2	-	N/A	(CGCACGC)n,(CCGCGC)n	1.5307
c35823/f1p0/2330	2360	1	Zm00008a037338_P01	complete	405	N/A	N/A	CNT0027209	(GTCATA)n	0.0448992
c18193/f1p0/1150	1149	1	AC198371.3_FGP011	5prime_partial	408	1	-	CNT0019957	(CTG)n	1.11351
c27094/f1p2/1652	1665	1	Glyma.19G227700.1.p	complete	408	4	NAD(P)-binding domain	CNT0002028	none	11.4104
c11136/f1p0/1010	1009	1	GRMZM5G839640_P01	complete	408	N/A	N/A	N/A	(CGCCGCCA)n,(CATG)n,(TG)n,(GT)n	8.53547
c16324/f1p0/2619	2619	N/A	OBS27708.1	complete	408	8	PTP type protein phosphatase;;Tyrosine specific protein phosphatases domain;;Protein-tyrosine phosphatase-like;;Protein-tyrosine phosphatase, active site	N/A	none	0
c31525/f1p0/1361	1377	N/A	Pavir.Cb00309.1.p	5prime_partial	408	7	WD40/YVTN repeat-like-containing domain;;WD40-repeat-containing domain;;WD40 repeat	N/A	(GAC)n,Copia-20_BD-I	1.49222
c2644/f1p0/1182	1172	N/A	Pavir.J40410.1.p	complete	408	3	-;;NAD kinase/diacylglycerol kinase-like domain	CNT0018685	none	1.44503
c46970/f1p0/2589	2481	N/A	Seita.2G004400.1.p	complete	408	1	-	N/A	Copia-124_SB-LTR	0.236101
c15973/f1p0/1189	1192	1	Sobic.001G485100.1.p	5prime_partial	408	1	-	CNT0010443	(CCG)n,(CGCCC)n	2.62815
c13763/f1p0/5428	5494	1	Sobic.002G298800.1.p	complete	408	N/A	N/A	CNT0019212	(CCTCCG)n,LINE1-63_SBi,SINE2-1a_SBi,LINE1-18_SBi	0.293335
c18810/f1p0/3831	3830	1	Sobic.007G149700.6.p	complete	408	8	-;;Protein kinase domain;;Protein kinase-like domain;;Serine/threonine-protein kinase, active site	CNT0032252	EnSpm-N20_SBi	0.110055
c9140/f1p0/1182	1170	1	Sobic.010G225600.1.p	complete	408	N/A	N/A	N/A	none	0.688296
c3521/f1p0/5798	5784	1	Zm00008a020538_P01	complete	408	5	DNA helicase;;P-loop containing nucleoside triphosphate hydrolase	lincRNA544_PMID_24635777	Helitron-N4_SBi	0.204154
c38010/f1p0/4114	4111	N/A	Carubv10007326m	complete	411	1	-	CNT0028472	(T)n	0
c5210/f1p1/1343	1356	1	GRMZM2G059285_P01	complete	411	10	Aldo/keto reductase;;NADP-dependent oxidoreductase domain;;Aldo/keto reductase, conserved site	CNT0027783	none	14.907
c4214/f1p0/5198	5170	1	GRMZM2G146673_P01	complete	411	N/A	N/A	GRMZM2G146731_T01	hAT-N20_SBi,(TATT)n	0.201014
c21130/f1p0/1273	1273	1	LOC_Os04g09654.1	complete	411	6	O-methyltransferase, family 2;;S-adenosyl-L-methionine-dependent methyltransferase;;O-methyltransferase COMT-type	N/A	(GCG)n	1.74166
c22008/f1p0/1470	1482	1	Pavir.J38284.1.p	complete	411	2	NAD(P)-binding domain	N/A	none	0.224646
c6542/f1p0/5586	5599	1	Sevir.3G238800.1.p	complete	411	N/A	N/A	CNT0027809	Gypsy-154_ZM-I	0.187614
c25562/f1p1/1221	1221	1	Sobic.001G104600.1.p	complete	411	N/A	N/A	CNT0003027	(GTTCGTT)n	7.3877
c17735/f2p3/984	984	1	Sobic.003G228300.1.p	5prime_partial	411	2	-	N/A	none	9.7322
c26732/f2p4/1112	1112	1	Sobic.003G228300.1.p	5prime_partial	411	2	-	N/A	none	0.222213
c37218/f1p0/3439	3420	N/A	Sobic.003G384100.1.p	complete	411	3	-;;Meiosis specific protein Spo22/ZIP4/TEX11	N/A	(CCG)n,(CTC)n	1.52467
c7637/f1p0/5142	5122	N/A	Sobic.008G067800.3.p	complete	411	N/A	N/A	CNT0025789	none	0
c22154/f1p0/1514	1439	1	Sobic.010G096300.1.p	complete	411	1	-	CNT0028970	(CCG)n	0.20228
c4464/f1p0/6153	6153	N/A	93011	complete	414	6	-;;ABC transporter-like;;P-loop containing nucleoside triphosphate hydrolase;;ABC transporter A, ABCA	N/A	(CCA)n,(CAA)n,(GAGCGC)n,(ACA)n,(AAC)n	0
c30680/f1p0/4160	4036	1	GRMZM2G702599_P02	5prime_partial	414	1	Leucine-rich repeat-containing N-terminal, plant-type	CNT0030362	(TGC)n	0
c11629/f1p0/1268	1272	1	LOC_Os09g33780.1	complete	414	1	-	N/A	HARB-N9_SBi	0.255056
c23297/f1p0/2715	2479	1	LOC_Os12g31470.1	complete	414	4	-	N/A	Gypsy-47_SB-I	0.0781636
c11397/f1p0/5806	5806	N/A	Lus10014076	complete	414	7	-;;Zinc finger, RING-CH-type;;Zinc finger, RING/FYVE/PHD-type	N/A	(GCGAGG)n	0
c26425/f2p0/2245	2246	1	Pavir.Aa01208.2.p	5prime_partial	414	1	-	CNT0019519	GA-rich	1.14237
c14637/f2p0/1159	1158	1	Pavir.J00126.1.p	complete	414	1	-	CNT0041904	HARB-N9_SBi	12.5245
c9085/f1p0/2667	2617	1	Pavir.J04628.1.p	5prime_partial	414	1	-	N/A	none	0.0863253
c37372/f1p0/4394	4253	1	Sevir.1G237900.1.p	complete	414	N/A	N/A	CNT0030537	(AGAC)n	0.0589331
c13010/f1p0/6648	6549	1	Sobic.002G161400.1.p	complete	414	N/A	N/A	N/A	(TTACTTA)n,Copia-106_SB-LTR	0
c25254/f1p1/3621	3618	1	Sobic.002G161400.1.p	complete	414	3	-	N/A	Copia-34_SB-LTR	0.94552
c10659/f1p0/2391	2384	1	Sobic.002G234500.1.p	complete	414	6	RlpA-like protein, double-psi beta-barrel domain;;Expansin/pollen allergen, DPBB domain	N/A	(TA)n	0.295572
c20519/f1p0/3778	3787	1	Sobic.003G050100.6.p	complete	414	3	-;;Pectin lyase fold	CNT0021229	(TTA)n	0.581711
c35026/f1p3/1323	1330	1	Sobic.006G077400.1.p	complete	414	3	-;;Plastid lipid-associated protein/fibrillin conserved domain	CNT0007577	(GCCG)n,LINE1-32_SBi	2.28351
c7517/f1p0/7769	7674	1	Sobic.010G206900.1.p	complete	414	N/A	N/A	N/A	(CCGCCA)n,G-rich,CLOUD-1_SB	0
c30407/f1p0/820	757	1	Sobic.010G274900.1.p	complete	414	4	-	N/A	(T)n	3.9627
c24847/f1p0/3332	3380	1	LOC_Os08g14940.1	complete	417	5	-;;Leucine-rich repeat domain, L domain-like;;Leucine-rich repeat	CNT0011711	none	0.176104
c33512/f1p0/4301	4314	1	LOC_Os12g31470.1	complete	417	1	-	CNT0021343	PREM3_ZM_LTR,RLG_scTat_1_1-LTR,Gypsy-73_SB-I,Gypsy-95_SB-I	0.508683
c35188/f1p0/1203	1162	1	Pavir.Aa01044.1.p	complete	417	3	Carotenoid oxygenase	N/A	none	0.0913231
c29230/f1p0/10009	10025	1	Pavir.Eb02695.2.p	complete	417	N/A	N/A	N/A	Gypsy-185_ZM-I	0.010052
c18100/f1p0/3226	3294	N/A	Seita.2G004200.1.p	complete	417	3	-;;Reverse transcriptase domain	N/A	LINE1-16_SBi	0.307069
c6620/f1p0/5467	5371	1	Seita.6G206800.2.p	complete	417	5	-;;Concanavalin A-like lectin/glucanase domain;;Protein kinase-like domain	CNT0024239	(T)n	0.216764
c28934/f1p0/2711	2774	1	Sobic.001G355800.1.p	complete	417	4	-;;Putative S-adenosyl-L-methionine-dependent methyltransferase	N/A	none	0.0848013
c5766/f1p0/1495	1494	1	Sobic.002G022800.5.p	5prime_partial	417	6	-;;F-box domain	CNT0019446	(TTG)n	0.525551
c31429/f1p0/2342	2402	N/A	Sobic.002G161100.1.p	complete	417	2	-	N/A	Helitron-6_ZM,Helitron-3_ZM	0.331631
c19112/f1p1/1667	1667	1	Sobic.004G058800.1.p	5prime_partial	417	N/A	N/A	N/A	none	2.05312
c7673/f1p0/671	672	1	Sobic.007G069500.1.p	5prime_partial	417	3	Phosphopantetheine binding ACP domain	N/A	(CT)n,(GA)n	88.679
c22862/f1p0/942	942	N/A	Sobic.008G150400.1.p	5prime_partial	417	10	WD40 repeat;;WD40-repeat-containing domain;;WD40/YVTN repeat-like-containing domain	N/A	(GCCGTC)n,(GGA)n,(TG)n	1.8368
c19350/f1p0/2403	2408	1	Sobic.009G251300.1.p	complete	417	3	-;;Nuclease associated modular domain 3	CNT0027885	none	0.0225216
c35875/f1p0/6215	6155	1	Sobic.010G208800.1.p	complete	417	5	-;;PAN/Apple domain	CNT0014816	(T)n,(AACAAA)n	0
c27089/f1p0/1468	1515	1	Sobic.010G257300.1.p	5prime_partial	417	2	-	CNT0009227	(GCGG)n	0.138879
c21294/f1p0/3864	3864	N/A	XP_011255069.1	complete	417	3	Organic anion transporter polypeptide OATP	N/A	none	0
c37044/f1p0/1122	1122	1	Zm00008a027674_P01	5prime_partial	417	2	-	N/A	(CCAACCG)n,(CGC)n	0.357215
c11958/f1p0/5375	5375	N/A	Glyma.03G134200.1.p	complete	420	8	-;;HAD-like domain	CNT0036520	(CAG)n	0
c27960/f1p0/3357	3687	1	Seita.3G329400.1.p	complete	420	2	-	CNT0018907	(CGG)n,ZhAT5_ZM,EnSpm-16_SBi,STOWAWAY3_SB	0.0839233
c40396/f1p0/2719	2719	1	Sobic.001G067700.1.p	complete	420	N/A	N/A	N/A	(CGATC)n	0.884676
c14823/f1p0/1816	1839	N/A	Sobic.001G124500.1.p	complete	420	3	ELO family	N/A	(T)n	0.461861
c44728/f1p0/2637	2535	N/A	Sobic.002G311200.1.p	complete	420	3	Multi antimicrobial extrusion protein	N/A	LINE1-21_SBi,STOWAWAY14_SB	0.313872
c8190/f1p0/1098	1179	1	Sobic.010G039300.1.p	complete	420	N/A	N/A	N/A	none	0.399282
c11379/f1p0/3559	3559	N/A	XP_002144780.1	complete	420	N/A	N/A	N/A	none	0
c12593/f1p4/798	800	1	Zm00008a010971_P01	complete	420	3	Protein of unknown function DUF393	N/A	none	35.6167
c10614/f1p0/2139	2137	N/A	106467	complete	423	8	Fumarate reductase/succinate dehydrogenase flavoprotein-like, C-terminal	N/A	none	0.122473
c15831/f1p0/3676	3676	N/A	Cucsa.002630.1	complete	423	4	Thiamin diphosphate-binding fold;;2-oxoglutarate dehydrogenase E1 component	N/A	none	0.0383375
c6757/f1p0/2631	2554	1	Pavir.Da01221.1.p	complete	423	3	-	CNT0017822	none	0.851735
c36670/f1p0/1123	1118	N/A	Pavir.Hb01233.1.p	5prime_partial	423	12	-;;P-loop containing nucleoside triphosphate hydrolase;;Small GTPase superfamily;;Small GTP-binding protein domain	CNT0024975	LINE1-33_SBi	0.79234
c5196/f1p0/5707	5700	1	Sobic.002G354800.6.p	complete	423	5	Nucleotide-binding alpha-beta plait domain;;RNA recognition motif domain	CNT0018525	(CCGCC)n,(C)n,(T)n,LINE1-25_ZM,L1-8_SBi	0.246719
c16170/f1p0/1147	1146	1	Sobic.006G093500.1.p	complete	423	8	Small heat shock protein HSP20;;HSP20-like chaperone;;Alpha crystallin/Hsp20 domain	N/A	(CGG)n,(GCG)n	6.27169
c5434/f1p0/1934	1928	1	Sobic.006G111600.1.p	5prime_partial	423	3	-	N/A	none	4.99192
c11318/f1p0/4073	4102	1	Sobic.006G193200.2.p	complete	423	5	Receptor, ligand binding region;;Periplasmic binding protein-like I	CNT0019489	none	0.254919
c37561/f1p0/2442	2434	N/A	Sobic.010G165700.1.p	complete	423	6	Domain of unknown function DUF223;;Nucleic acid-binding, OB-fold	N/A	Helitron-N4_SBi	0.0734452
c24149/f1p0/7323	7324	N/A	XP_007839764.1	5prime_partial	423	1	-	N/A	(T)n	0.0137443
c41523/f1p0/2675	2661	1	Zm00008a006872_P01	complete	423	N/A	N/A	CNT0017321	G-rich,(GGCG)n,(CT)n,LINE1-4_SBi,LINE1-2_ZM	0.285936
c29877/f1p0/3344	3349	1	Cucsa.031240.1	complete	426	5	Ribonuclease H-like domain;;Integrase, catalytic core	CNT0019305	RLG_scReina_2_1-I	0.73539
c36974/f1p0/1224	1233	1	LOC_Os12g31470.1	3prime_partial	426	3	-;;Retrotransposon gag domain	N/A	Gypsy-45_SB-I,Gypsy-82_SB-I	1.83618
c31474/f1p0/3914	3914	N/A	OAG24645.1	complete	426	2	-	N/A	GA-rich,(GTGTTT)n	0
c17534/f1p0/6023	6023	N/A	Pavir.Eb01441.1.p	complete	426	9	Protein kinase domain;;Protein kinase-like domain;;Serine/threonine-protein kinase, active site;;Serine-threonine/tyrosine-protein kinase catalytic domain	CNT0031782	(CT)n,Gypsy-133_SBi-LTR,(TG)n	0.142893
c25340/f1p0/1410	1402	1	Pp3c19_6580V3.2.p	5prime_partial	426	7	-;;Catalase core domain;;Catalase-like domain;;Catalase, mono-functional, haem-containing	N/A	none	0.919037
c36510/f1p0/3539	3569	1	Sevir.1G239000.1.p	complete	426	5	Leucine-rich repeat domain, L domain-like;;Leucine-rich repeat	CNT0030362	(A)n	0.256551
c20314/f1p0/1538	1543	1	Sobic.002G384200.1.p	complete	426	1	-	N/A	none	3.84908
c25849/f1p0/922	922	N/A	Sobic.003G366100.3.p	5prime_partial	426	2	Luciferase-like domain	N/A	(CGG)n	1.68136
c11185/f1p0/2579	2584	N/A	Sobic.005G030000.2.p	complete	426	3	-	CNT0025789	none	0.109078
c4798/f1p0/1569	1572	1	Sobic.006G073900.3.p	complete	426	4	-;;TB2/DP1/HVA22-related protein	N/A	none	9.80417
c7538/f1p0/2474	2478	N/A	Sobic.007G090400.1.p	5prime_partial	426	4	-;;FMN-binding split barrel	N/A	none	0.667811
c18984/f1p0/1081	1079	N/A	Sobic.010G104600.1.p	complete	426	3	Caleosin-related	N/A	none	1.03168
c3676/f1p0/5543	5435	1	Zm00008a018558_P01	complete	426	6	ABC transporter A, ABCA;;ABC transporter-like;;P-loop containing nucleoside triphosphate hydrolase	TCONS_00065783	(CGG)n,(ACGGCG)n,(ATA)n,(A)n	0.128918
c24189/f1p0/2725	2731	1	Zm00008a027677_P01	complete	426	2	-	N/A	none	0.108502
c30420/f1p0/1219	1243	1	GRMZM2G108597_P01	complete	429	3	-	N/A	none	0.304073
c16244/f1p0/2425	2408	1	GRMZM5G836341_P01	complete	429	N/A	N/A	N/A	none	0.330699
c20106/f1p0/1183	1184	1	Pahal.B00156.1	5prime_partial	429	3	-;;Domain of unknown function DUF775;;OPI10 family	N/A	none	5.31241
c35835/f1p0/3438	3481	1	Pavir.Aa02823.1.p	complete	429	4	Leucine-rich repeat domain, L domain-like;;Concanavalin A-like lectin/glucanase domain	CNT0026835	none	0.0187637
c22523/f1p0/3885	3869	N/A	Pavir.J38706.1.p	complete	429	N/A	N/A	lincRNA406_PMID_24635777	HARB-N20_SBi,LADON_TA,EnSpm-N1_SB	0.0229399
c17751/f1p0/2555	2557	1	Sobic.001G388000.5.p	complete	429	9	Arf GTPase activating protein	CNT0039714	none	0.210793
c8235/f1p0/3810	3812	1	Sobic.001G388000.6.p	complete	429	9	Arf GTPase activating protein	CNT0039714	(TTTC)n	0.0751419
c17926/f1p0/2969	2969	N/A	Sobic.002G265700.2.p	complete	429	N/A	N/A	N/A	LINE1-13_SBi	0
c39509/f1p0/2767	2639	1	Sobic.005G019200.2.p	complete	429	2	-;;Leucine-rich repeat domain, L domain-like	CNT0020781	none	0.39251
c15333/f1p0/1483	1458	1	Zm00008a026027_P01	5prime_partial	429	2	-	CNT0035716	none	0.257059
c22491/f1p0/3683	3621	N/A	Bradi4g30827.2.p	complete	432	8	Protein kinase domain;;Serine-threonine/tyrosine-protein kinase catalytic domain;;Protein kinase-like domain	CNT0018613	none	0.0122171
c18965/f1p0/2954	2914	1	Pahal.I00469.3	complete	432	1	-	N/A	(TTTCT)n	0
c6611/f1p1/3702	3668	1	Pavir.Ab00181.3.p	complete	432	5	Ionotropic glutamate receptor	N/A	none	0.333201
c18260/f1p0/3120	3121	1	Pavir.J03098.1.p	5prime_partial	432	N/A	N/A	N/A	LINE1-13_SBi	0
c32504/f1p2/3840	3838	1	Sobic.001G381900.4.p	complete	432	5	-;;PRC-barrel-like	CNT0017848	(CGCGC)n,MuDR-9_ZM	0.0356093
c27456/f1p0/2545	2538	N/A	Sobic.005G218300.1.p	complete	432	1	-	CNT0030069	(CGC)n,(CCCCCTC)n,L1-4_SBi	0.499747
c8345/f1p0/7030	6899	1	Sobic.009G020100.1.p	complete	432	4	-;;NUDIX hydrolase domain-like	CNT0023131	Copia-143_SB-LTR	0.321002
c18095/f1p0/5923	5932	N/A	Bradi4g33632.1.p	complete	435	4	Domain of unknown function DUF4283;;Zinc knuckle CX2CX4HX4C	lincRNA325_PMID_24635777	(TCCA)n,L1-7_ZM	0.0610903
c19071/f1p0/2646	2633	1	Cucsa.031240.1	complete	435	6	Reverse transcriptase domain	CNT0019305	Gypsy-104_SB-I,Gypsy-104_SB-LTR	0
c12061/f1p0/2385	2387	1	GRMZM2G171871_P01	5prime_partial	435	2	-	N/A	(CCTCCG)n,(TCGCCG)n,(GCGCCA)n	1.52646
c6704/f1p0/3667	3665	N/A	KNG49815.1	complete	435	N/A	N/A	N/A	(CAG)n,CACTA_LP	0
c16639/f1p0/3441	3433	N/A	Manes.18G144400.1.p	complete	435	5	-;;THIF-type NAD/FAD binding fold;;Ubiquitin-activating enzyme, catalytic cysteine domain	N/A	none	0.0762378
c22406/f1p0/4026	3971	1	Pavir.Ga00792.3.p	complete	435	10	-;;Periplasmic binding protein-like I;;Receptor, ligand binding region;;GPCR, family 3	CNT0019489	none	0.630466
c13836/f1p0/5256	5379	1	Seita.4G177200.1.p	complete	435	3	Concanavalin A-like lectin/glucanase domain	CNT0020946	(A)n,(C)n,LINE1-21_SBi	0.0451523
c28670/f1p1/1631	1642	1	Sevir.1G237900.1.p	complete	435	7	-;;Protein kinase domain;;Protein kinase-like domain;;Serine/threonine-protein kinase, active site	CNT0030537	none	0.426393
c15806/f2p1/3440	3440	1	Sevir.3G092900.1.p	complete	435	4	Histidine triad (HIT) protein;;HIT-like domain	CNT0019301	(CGC)n,Copia-127_SB-I	0.794416
c35610/f1p0/10674	10582	1	Sevir.8G026500.2.p	complete	435	N/A	N/A	N/A	(T)n,A-rich	0.0857873
c4476/f1p0/2911	2871	1	Sobic.001G314400.1.p	complete	435	N/A	N/A	CNT0021137	HARB-N28_SBi	0.787144
c22904/f1p0/534	537	1	Sobic.003G291300.1.p	5prime_partial	435	5	tRNA (guanine-N1-)-methyltransferase, N-terminal;;Alpha/beta knot methyltransferases;;tRNA/rRNA methyltransferase, SpoU type;;RNA methyltransferase TrmH family	N/A	none	3.11175
c38130/f1p0/2218	2154	1	Sobic.005G086300.1.p	complete	435	5	-;;AP180 N-terminal homology (ANTH) domain;;Phosphoinositide-binding clathrin adaptor, domain 2	N/A	(CG)n,(TCC)n	1.14964
c44672/f1p0/2428	2420	N/A	Sobic.006G004400.2.p	5prime_partial	435	3	-	N/A	(TCTCTG)n,(ATAGTAT)n	0.540753
c32059/f1p3/1185	1184	N/A	GRMZM2G367638_P01	complete	438	4	-;;Histidine phosphatase superfamily	N/A	(GGCCCC)n	18.766
c8791/f1p0/1998	1944	1	LOC_Os12g10140.1	complete	438	4	-;;Winged helix-turn-helix DNA-binding domain	N/A	(GCG)n	0.187795
c34982/f1p1/3538	3545	1	Pavir.Aa01043.1.p	complete	438	6	P-loop containing nucleoside triphosphate hydrolase	N/A	none	1.15041
c22961/f1p0/1361	1362	1	Pavir.Fb01786.1.p	complete	438	1	-	N/A	none	0.399105
c30991/f1p0/1177	1177	1	Pavir.J32374.1.p	5prime_partial	438	1	-	N/A	(GAC)n,MuDR-9_SBi	0.998264
c40136/f1p0/2739	2744	1	Seita.3G394700.3.p	complete	438	9	SET domain;;Post-SET domain	CNT0017422	none	1.08759
c33095/f1p0/2976	2982	1	Seita.7G062700.1.p	complete	438	7	Protein kinase-like domain;;Serine-threonine/tyrosine-protein kinase catalytic domain;;Protein kinase domain	CNT0029164	EnSpm-22_SBi	1.42882
c3767/f1p0/2702	2695	1	Seita.7G062700.1.p	complete	438	7	Protein kinase-like domain;;Serine-threonine/tyrosine-protein kinase catalytic domain;;Protein kinase domain	CNT0029164	none	0.685685
c29569/f1p0/3480	3472	1	Sobic.002G034900.1.p	complete	438	3	-	N/A	LINE1-67_SBi	0.145171
c11398/f1p0/2556	2555	1	Sobic.004G158600.2.p	5prime_partial	438	1	-	CNT0019175	none	0.914046
c23164/f1p0/1372	1373	N/A	Sobic.006G221500.1.p	complete	438	4	-;;Phospholipid/glycerol acyltransferase	N/A	(CTCCT)n,(GGC)n,(GCGTCC)n,(TGCC)n	1.23514
c19780/f1p0/2181	2181	1	Sobic.007G169200.1.p	complete	438	8	-;;EF-hand domain pair;;EF-Hand 1, calcium-binding site;;EF-hand domain	CNT0023148	none	0.304198
c10576/f1p0/2614	2618	N/A	Bradi4g09250.1.p	complete	441	2	-	N/A	(CATTT)n,LINE1-28_SBi,LINE1-65_SBi	0.89205
c34970/f1p0/2449	2386	1	Brast05G035300.1.p	complete	441	8	-;;WD40/YVTN repeat-like-containing domain;;WD40-repeat-containing domain;;WD40 repeat, conserved site;;WD40 repeat	CNT0029641	none	0.788907
c27485/f1p0/2254	2246	1	mrna28906.1-v1.0-hybrid	complete	441	5	Ribonuclease H-like domain;;Integrase, catalytic core	CNT0021343	Gypsy-40_SB-I	0.562349
c6866/f1p0/5194	5206	N/A	Pahal.E02531.1	complete	441	4	DNA helicase Pif1-like;;P-loop containing nucleoside triphosphate hydrolase	N/A	Helitron-3_SBi,(ATTTT)n,Helitron-2_SBi,(TCATCA)n	0.0921191
c16742/f1p0/5422	5417	1	Pahal.G02282.2	complete	441	1	-	N/A	(GAATA)n,(CT)n,LINE1-13_SBi	0.62866
c36901/f1p1/2006	2004	1	Pavir.J08295.1.p	complete	441	1	-	N/A	LTR-1_SBi,Gypsy-124N_SBi-LTR,Gypsy-123_SBi-LTR,ATHILA-1_SBi-I,Gypsy-120_SB-I	2.53213
c11620/f1p0/1585	1574	1	Pavir.J16947.1.p	complete	441	3	-	N/A	HARB-14_SBi	0.986631
c16713/f1p0/1393	1395	1	Pavir.J16947.1.p	complete	441	3	-	N/A	HARB-14_SBi	1.61442
c23848/f1p0/4375	4021	N/A	Seita.8G179900.1.p	5prime_partial	441	N/A	N/A	N/A	(TTTTTGG)n	0.010079
c33443/f1p0/1209	1211	1	Sobic.001G535700.2.p	complete	441	6	Stress responsive alpha-beta barrel;;Dimeric alpha-beta barrel	CNT0031656	none	0.774611
c18134/f1p0/3768	3622	1	Bradi1g33510.1.p	complete	444	5	Leucine-rich repeat;;Leucine-rich repeat domain, L domain-like	CNT0028450	LINE1-14_SBi	0.320523
c8166/f1p0/6138	6194	1	GRMZM2G481231_P01	5prime_partial	444	2	-	CNT0023183	(CCTCCG)n,(GGACGG)n	0.0769978
c7966/f1p0/6077	6065	N/A	OAL52466.1	complete	444	5	-;;Signal transduction histidine kinase, dimerisation/phosphoacceptor domain	N/A	(AG)n	0
c10839/f1p0/4457	4072	1	Sobic.001G542500.2.p	complete	444	2	-	CNT0032096	none	0
c2751/f1p0/1163	1163	N/A	Sobic.002G116400.1.p	complete	444	2	-	N/A	Copia-66_SB-I	0.640505
c26984/f1p0/1487	1503	N/A	Sobic.002G308000.1.p	5prime_partial	444	4	Trichome birefringence-like family;;Protein trichome birefringence-like 13;;PMR5 N-terminal domain	CNT0017888	(CCT)n,(CCGCC)n	1.8619
c37793/f1p0/837	837	1	Sobic.007G028700.2.p	complete	444	9	-;;Zinc finger, LSD1-type;;Zinc finger, RING/FYVE/PHD-type	N/A	none	3.78192
c37030/f1p0/620	622	1	Sobic.007G204400.2.p	5prime_partial	444	4	-;;Heat shock protein DnaJ, cysteine-rich domain	N/A	none	42.5634
c8849/f1p0/3796	3786	N/A	Zm00008a033536_P01	complete	444	N/A	N/A	lincRNA466_PMID_24635777	LINE1-9_SBi,LINE1-5_SBi	0.0106353
c19149/f1p1/750	749	1	GRMZM2G124321_P01	5prime_partial	447	7	-;;Hemimethylated DNA-binding domain	CNT0026296	none	3.12823
c12320/f1p1/1060	1062	1	GRMZM2G136139_P03	complete	447	2	-	N/A	(AGGCGG)n,(CGCCGG)n	0.789234
c11420/f1p0/2439	2439	1	LOC_Os11g05030.1	complete	447	5	Reverse transcriptase domain	CNT0024880	LINE1-2_SBi	0.56672
c19038/f1p0/3633	3623	N/A	Pahal.H01522.1	5prime_partial	447	N/A	N/A	CNT0026933	(TGGTCG)n,Gypsy-95_SB-I	0.0111138
c44519/f1p0/2553	2560	1	Sobic.002G226100.1.p	5prime_partial	447	1	-	CNT0011847	(CCG)n,MuDR-N10_SBi	0.205618
c28366/f1p0/1165	1169	N/A	Sobic.003G033200.1.p	5prime_partial	447	2	Leucine-rich repeat domain, L domain-like	N/A	none	3.7281
c21893/f1p2/2587	2585	1	Sobic.006G118300.1.p	5prime_partial	447	1	-	N/A	(CGC)n,LINE1-68_SBi	3.47261
c29063/f1p0/1157	1157	N/A	Sobic.010G136900.1.p	complete	447	3	-;;ABC-2 type transporter	CNT0025214	none	0.487198
c17026/f1p0/5460	5460	N/A	Zosma224g00310.1	complete	447	3	-	N/A	G-rich,(GGTTT)n	0.0184365
c9431/f1p0/1250	1256	N/A	OAG22129.1	complete	450	1	-	N/A	none	0.19235
c32945/f1p0/4120	4158	1	Pahal.G01285.1	complete	450	1	Domain of unknown function DUF4216	CNT0029790	EnSpm-23_SBi	0.100227
c22040/f2p1/1272	1271	1	Sobic.001G469900.1.p	5prime_partial	450	2	-	CNT0031367	(CTC)n	3.49108
c34705/f1p1/1339	1342	1	Sobic.001G535700.2.p	complete	450	6	Stress responsive alpha-beta barrel;;Dimeric alpha-beta barrel	CNT0031656	none	2.33065
c12954/f1p0/4106	3918	N/A	Sobic.005G220800.1.p	complete	450	2	Leucine-rich repeat domain, L domain-like	CNT0026835	A-rich	0.119966
c4474/f1p0/1770	1728	1	Sobic.008G157700.1.p	complete	450	1	-	N/A	Gypsy-N129_SBi-LTR	0.167193
c9346/f1p0/5346	5501	1	Cucsa.031240.1	complete	453	6	Ribonuclease H-like domain;;Integrase, catalytic core	TCONS_00029225	Gypsy-47_SB-I	0.104528
c31162/f1p0/3979	3979	N/A	KXL47098.1	complete	453	1	-	N/A	MuDR1_ZM,(GAC)n,(GTG)n	0
c15231/f1p1/2896	2896	1	LOC_Os02g35820.1	complete	453	4	Retroviral aspartyl protease	CNT0025537	Gypsy-79_SB-I	0.771659
c12916/f1p7/1138	1142	1	Sevir.1G044900.1.p	complete	453	7	S-adenosyl-L-methionine-dependent methyltransferase;;O-methyltransferase COMT-type;;O-methyltransferase, family 2	N/A	none	0.772143
c39325/f1p0/3705	3693	1	Sobic.002G208301.1.p	complete	453	5	-;;Periplasmic binding protein-like I;;Receptor, ligand binding region	CNT0018775	none	0.206805
c12846/f1p0/6682	6560	1	Sobic.003G267300.1.p	complete	453	6	-;;ABC transporter type 1, transmembrane domain	CNT0019802	G-rich,Copia6-SB_I-int,GA-rich	0
c21347/f1p0/2321	2303	N/A	Sobic.003G317400.1.p	complete	453	2	-	CNT0018685	(CGG)n,(CCCA)n	0.69026
c7124/f1p0/1112	1122	1	Sobic.006G073900.1.p	complete	453	3	TB2/DP1/HVA22-related protein	N/A	none	5.35559
c41315/f1p0/2535	2492	1	LOC_Os06g49120.2	complete	456	4	NAD(P)-binding domain	N/A	(A)n	1.07151
c24782/f1p0/6665	6485	1	Pahal.A02543.1	complete	456	5	-;;Leucine-rich repeat domain, L domain-like;;Leucine-rich repeat	CNT0030538	none	0.051778
c39252/f1p0/3308	3296	1	Sobic.001G267500.2.p	5prime_partial	456	10	Pentatricopeptide repeat	N/A	Helitron-3_ZM	0.067045
c29762/f1p0/1980	1972	1	Sobic.007G090427.1.p	complete	456	4	Alpha/Beta hydrolase fold;;Dienelactone hydrolase	lincRNA526_PMID_24635777	Copia-38-LTR_ZM,Gypsy-N129_SBi-LTR	1.1789
c12000/f1p0/3520	3520	1	Sobic.007G161500.1.p	complete	456	1	-	CNT0035178	(TA)n,(GCTT)n,PREM4_ZM_LTR	4.65274
c2786/f1p0/2430	2430	N/A	Spipo1G0013800	complete	456	3	S-adenosylmethionine decarboxylase;;S-adenosylmethionine decarboxylase, core	N/A	none	0
c11964/f1p0/6196	6199	N/A	AMD39096.1	complete	459	6	Beta-ketoacyl synthase, N-terminal;;Thiolase-like;;Beta-ketoacyl synthase, active site	N/A	none	0.0487159
c36919/f1p1/3778	3780	N/A	Brast03G275700.1.p	complete	459	2	-	N/A	L1-17_BDi	0.292935
c11417/f1p0/3836	3663	1	GRMZM2G474777_P01	complete	459	7	-;;Leucine-rich repeat domain, L domain-like;;Leucine-rich repeat	CNT0028450	LINE1-14_SBi	0.110088
c6900/f1p0/1604	1597	1	Oropetium_20150105_06050A	5prime_partial	459	3	-	N/A	none	0.504262
c7551/f1p0/3382	3409	N/A	Pavir.J19014.1.p	complete	459	N/A	N/A	N/A	Copia12-ZM_I-int,(GAT)n	0.0344313
c18402/f1p0/4148	3924	1	Sobic.001G298400.3.p	complete	459	5	CCT domain	lincRNA336_PMID_24635777	(CGT)n,(GCCGCGT)n,(CGG)n,(GCG)n,EnSpm-N12_SBi	0.158116
c11537/f1p0/2215	2227	N/A	Sobic.002G039900.2.p	complete	459	1	-	N/A	none	0.117523
c19600/f1p0/1719	1560	1	Sobic.003G284800.1.p	5prime_partial	459	3	-	CNT0018738	none	0.0387166
c18599/f1p0/1072	1071	1	Sobic.004G000300.2.p	5prime_partial	459	7	Zinc finger, RING-CH-type;;E3 ubiquitin-protein ligase MARCH-like;;Zinc finger, RING/FYVE/PHD-type	CNT0011006	(TGTG)n	14.6261
c7752/f1p0/3148	3341	N/A	Sobic.004G107500.3.p	complete	459	6	-;;RmlC-like jelly roll fold;;Cyclic nucleotide-binding-like;;Cyclic nucleotide-binding domain	CNT0030199	none	0.083925
c32114/f1p0/1525	1451	1	Sobic.007G156300.1.p	complete	459	4	-;;Cytochrome P450	N/A	(CGA)n,(CAATG)n	1.42065
c28033/f1p1/598	598	1	Sobic.007G161500.1.p	5prime_partial	459	2	-	CNT0035178	(TA)n	0
c23375/f1p0/1080	1084	1	Sobic.007G227600.2.p	complete	459	10	RNA recognition motif domain;;Nucleotide-binding alpha-beta plait domain	N/A	none	5.44176
c30688/f1p0/3718	3526	1	GRMZM2G177570_P01	complete	462	5	Leucine-rich repeat domain, L domain-like;;Leucine-rich repeat	CNT0028450	LINE1-14_SBi	0.264122
c40968/f1p0/2748	2745	1	LOC_Os09g12790.1	complete	462	6	-;;Potassium channel domain	CNT0011215	(CTTCGTC)n	4.01084
c12547/f1p0/1191	1197	1	Sobic.001G104600.1.p	5prime_partial	462	2	Peroxiredoxin-like FAM213/AAED1	CNT0022586	none	0.427627
c31007/f1p0/792	794	1	Sobic.002G194800.1.p	3prime_partial	462	3	-;;PMR5 N-terminal domain	CNT0009975	(CT)n	0.848422
c10890/f1p0/3724	3760	1	Sobic.004G026900.1.p	complete	462	3	-;;Ubiquitin-conjugating enzyme/RWD-like	CNT0018907	(CGG)n,ZhAT5_ZM,EnSpm-16_SBi,STOWAWAY14_SB,STOWAWAY3_SB	0.638683
c5692/f1p0/3376	3371	1	Sobic.004G026900.1.p	complete	462	3	-;;Ubiquitin-conjugating enzyme/RWD-like	CNT0018907	(CGG)n,ZhAT5_ZM,EnSpm-16_SBi,EnSpm-N12_SBi	1.30134
c27803/f1p0/3702	3662	N/A	Sobic.004G089300.2.p	complete	462	2	ABC transporter A, ABCA	TCONS_00065783	Gypsy-63_SB-I	0.0989979
c32758/f1p0/3613	3616	N/A	Sobic.006G137400.1.p	complete	462	2	-	CNT0020158	G-rich,(TTTC)n,STOWAWAY13_SB	0.0612442
c32455/f1p0/1252	1257	N/A	Sobic.006G221500.1.p	complete	462	4	-;;Phospholipid/glycerol acyltransferase	N/A	(CTCCT)n,(GCGTCC)n	1.58142
c44433/f1p0/3748	3693	1	Sobic.008G182000.2.p	complete	462	3	Domain of unknown function DUF4220	CNT0031534	none	0.0665399
c20496/f1p0/2401	2331	1	Sobic.010G096300.1.p	complete	462	2	-	CNT0028970	(CCT)n,(CCG)n	1.82718
c24455/f1p1/2741	2758	1	Zm00008a018970_P01	complete	462	3	-;;Reverse transcriptase zinc-binding domain	CNT0021037	Gypsy-154_ZM-I,(TCCGCCG)n,LINE1-20_SBi	2.40957
c31775/f1p2/3600	3619	1	Zm00008a020351_P01	complete	462	6	-;;Nucleic acid-binding, OB-fold;;Replication protein A, OB domain	CNT0021035	Helitron-5_SBi	0.329853
c6342/f1p0/6574	6584	N/A	Cucsa.031240.1	complete	465	5	Ribonuclease H-like domain;;Integrase, catalytic core	TCONS_00029225	Gypsy-104_SB-I,Gypsy-43_SB-I,Gypsy-144_ZM-I,Gypsy-74-LTR_ZM,RLG_scTat_1_4-LTR	0.431494
c23162/f1p0/1284	1204	N/A	GRMZM2G415711_P01	complete	465	2	-	N/A	TSB2,(A)n	2.5847
c31570/f1p0/2408	2407	N/A	LOC_Os02g35820.2	complete	465	6	Retroviral aspartyl protease;;Aspartic peptidase domain;;Aspartic peptidase, active site	TCONS_00029225	Gypsy-43_SB-I,Gypsy-144_ZM-I	0.710021
c22985/f1p0/1318	1307	1	Pahal.A00075.1	complete	465	2	-	N/A	none	1.186
c27318/f1p0/1274	1144	1	Pahal.E03035.1	complete	465	2	-;;Proton-dependent oligopeptide transporter family	N/A	none	0.738297
c18454/f1p0/1466	1460	1	Pavir.J29913.1.p	complete	465	3	-	CNT0030524	(TCCG)n,HARB-6_SBi	1.36643
c22018/f1p0/4424	4432	1	Pavir.J30632.1.p	complete	465	3	-	N/A	none	0.024059
c33436/f1p0/4493	4416	1	Sevir.2G129400.1.p	complete	465	1	-	CNT0028614	(T)n	0.084802
c33171/f1p0/3672	3601	1	Sobic.001G505600.1.p	complete	465	4	uDENN domain	N/A	(TCG)n	0
c8552/f1p1/1330	1340	N/A	Sobic.002G343901.1.p	complete	465	1	-	N/A	none	0.212749
c37203/f1p0/1760	1749	1	Sobic.009G161000.2.p	complete	465	9	NADP-dependent oxidoreductase domain;;Aldo/keto reductase;;Aldo/keto reductase, conserved site	CNT0027783	(TTATCTT)n	1.11962
c32997/f1p0/1229	1229	1	Sobic.010G212100.1.p	3prime_partial	465	6	-;;NAD-dependent epimerase/dehydratase;;NAD(P)-binding domain	CNT0028704	none	2.92769
c8710/f1p0/1775	1776	1	GRMZM2G080546_P01	complete	468	5	-;;NAD-dependent epimerase/dehydratase;;NAD(P)-binding domain	CNT0002028	none	7.23255
c6707/f1p0/3082	3077	1	GRMZM2G181568_P01	5prime_partial	468	3	-	CNT0023183	(CGCCTC)n	0.200919
c13991/f1p0/4120	4098	1	Pavir.J11970.1.p	5prime_partial	468	1	Leucine-rich repeat-containing N-terminal, plant-type	CNT0030362	none	0.128319
c14565/f1p1/5607	5607	N/A	Seita.8G054800.2.p	complete	468	4	Leucine-rich repeat domain, L domain-like	CNT0018627	none	0.0462417
c2892/f1p0/2803	2804	1	Sevir.7G154200.1.p	complete	468	3	-;;Uncharacterised protein family Ycf20	CNT0022747	(CCCTCT)n,SINE2-1a_SBi	1.55769
c31474/f1p0/2461	2460	1	Sobic.001G501701.1.p	complete	468	1	-	N/A	(C)n,Tourist1g_SB,(GTATAT)n,hAT-N4_SBi	1.31593
c11468/f1p0/1403	1395	1	Sobic.003G090000.1.p	complete	468	5	TRAF-like;;SIAH-type domain;;Zinc finger, SIAH-type;;E3 ubiquitin-protein ligase SIN-like	N/A	none	0.548416
c22671/f1p0/2686	2692	1	Sobic.005G156400.1.p	complete	468	5	Leucine-rich repeat;;Leucine-rich repeat domain, L domain-like	CNT0029933	GA-rich,STOWAWAY13_SB	0.266437
c42119/f1p0/2600	2553	1	Brast03G079700.1.p	complete	471	3	-;;Endonuclease/exonuclease/phosphatase	N/A	L1-2_SBi	0.0409107
c15735/f1p0/2204	2182	1	GRMZM2G042080_P01	5prime_partial	471	N/A	N/A	CNT0001139	none	0.952565
c9609/f1p0/2867	2870	N/A	Pavir.Ba02777.1.p	3prime_partial	471	N/A	N/A	N/A	none	0.147312
c25952/f1p0/3534	3475	1	Pavir.Ia02940.1.p	complete	471	4	-;;Rossmann-like alpha/beta/alpha sandwich fold	CNT0027732	(GCC)n	0.550389
c24643/f1p0/3549	3619	1	Seita.4G231800.1.p	5prime_partial	471	5	-;;Leucine-rich repeat domain, L domain-like;;Leucine-rich repeat-containing N-terminal, plant-type	lincRNA566_PMID_24635777	none	0.311393
c27677/f1p0/1959	1898	1	Seita.8G196000.1.p	complete	471	1	-	N/A	(CAACACA)n	0.793077
c7230/f1p0/3428	3427	1	Sobic.001G468100.1.p	5prime_partial	471	3	-	CNT0023183	(CGCCTC)n	0.21474
c18515/f1p0/2334	2332	1	Sobic.003G385100.5.p	complete	471	7	Zinc finger, TAZ-type	CNT0008748	(CCG)n,(CCCCCT)n,(GTCGCC)n	4.95723
c18212/f1p0/3490	3484	1	Sobic.004G026900.1.p	complete	471	1	-	CNT0018907	(CGG)n,ZhAT5_ZM,EnSpm-16_SBi,(TTA)n,(AGCC)n	0.324397
c20184/f1p0/1911	1988	1	Sobic.004G215800.2.p	complete	471	2	-;;Protein phosphatase 2A regulatory subunit PR55	N/A	(T)n,(AGAGAT)n	0
c35729/f1p0/2378	2359	1	Sobic.007G149700.4.p	complete	471	4	-;;Protein kinase-like domain;;Concanavalin A-like lectin/glucanase domain	CNT0032252	none	0.315823
c5823/f1p0/1275	1275	1	Sobic.007G161500.1.p	5prime_partial	471	1	-	CNT0035178	(TA)n,(GCTT)n	0
c12464/f1p0/2623	2623	N/A	Sobic.009G041700.2.p	3prime_partial	471	2	-	N/A	none	0
c18479/f1p0/3264	3394	1	GRMZM2G071396_P01	complete	474	6	-;;Leucine-rich repeat domain, L domain-like;;Protein kinase-like domain	CNT0030362	(AGAC)n	0.243142
c10398/f1p0/1514	1530	N/A	GRMZM2G097135_P01	complete	474	4	-	N/A	(T)n	0.145496
c30899/f1p0/3949	3949	N/A	Mapoly0079s0050.2.p	complete	474	6	Protein kinase domain;;Serine-threonine/tyrosine-protein kinase catalytic domain;;Protein kinase-like domain	N/A	none	0.0101963
c24903/f1p0/2276	2278	N/A	Migut.H00834.1.p	complete	474	7	Protein kinase domain;;Protein kinase-like domain	N/A	(AG)n,(CGA)n,(CTCC)n,(CAC)n	0
c38731/f1p0/1201	1201	1	Pahal.I02830.1	5prime_partial	474	3	-;;Domain of unknown function DUF4218	CNT0024352	ENSPM1_ZM	0.041779
c34718/f1p0/2508	2503	1	Pavir.J34689.1.p	complete	474	6	S-adenosyl-L-methionine-dependent methyltransferase;;RNA cap guanine-N2 methyltransferase	CNT0023536	RTE-1_TD	0.769813
c35277/f1p1/1188	1192	N/A	Sevir.4G131500.1.p	complete	474	1	-	N/A	none	0.188732
c15519/f1p0/2683	2394	1	Sobic.001G071250.1.p	complete	474	2	-	N/A	MUDR1N_SB	1.03902
c8381/f1p1/790	788	1	Sobic.001G444400.1.p	5prime_partial	474	13	Plant peroxidase;;Haem peroxidase, plant/fungal/bacterial;;Peroxidases heam-ligand binding site;;Haem peroxidase	N/A	none	1.32855
c38488/f1p0/2350	2347	1	Sobic.002G111700.4.p	5prime_partial	474	3	-;;DYW domain	CNT0007583	none	0.13393
c5401/f1p0/2360	2362	1	Sobic.003G301500.1.p	complete	474	7	HAD-like domain	N/A	none	1.65558
c28089/f1p0/2202	2203	1	Sobic.009G251300.1.p	complete	474	3	Nuclease associated modular domain 3	CNT0027885	none	1.07203
c15331/f1p0/5385	5398	1	Thecc1EG021998t1	complete	474	4	-;;Chromo domain-like;;Chromo domain	CNT0019305	Gypsy-95_SB-I,Gypsy-139_ZM-I	0.0409199
c30934/f1p0/1476	1476	N/A	Zm00008a023334_P01	5prime_partial	474	1	-	CNT0019112	Helitron-N9_SBi	0.32736
c11919/f1p0/5211	5212	N/A	Zm00008a029386_P01	complete	474	5	-;;DNA-directed RNA polymerase, phage-type	N/A	(TCT)n,Gypsy-173_ZM-I,(TC)n,(GT)n	0.0193137
c20710/f1p0/3837	3829	N/A	Zm00008a039272_P01	complete	474	1	-	TCONS_00028471	(GCCGC)n,EnSpm4_SB,ENSPM-6_ZM,EnSpm11_SB,(TG)n,(AT)n	0.376187
c7321/f1p0/3621	3630	N/A	81632	complete	477	5	-;;Mechanosensitive ion channel MscS;;LSM domain	N/A	(TCTTCA)n	0.0332771
c9302/f1p0/2235	2237	1	ChrSy.fgenesh.mRNA.7	complete	477	3	-;;Reverse transcriptase, RNA-dependent DNA polymerase	lincRNA372_PMID_24635777	Copia-16_SB-I,Copia-33_SB-I	0.413821
c34134/f1p0/2939	2943	1	LOC_Os11g08729.1	complete	477	N/A	N/A	N/A	ATHILA-3_SBi-I,ATHILA-2_SBi-I	0
c19118/f1p0/3835	3837	1	Pavir.Cb00949.1.p	complete	477	4	-;;Neprosin;;Neprosin activation peptide	CNT0032300	Helitron-N13_SBi,STOWAWAY1_SB,STOWAWAY14_SB	0.0124187
c16633/f1p3/3483	3510	1	Seita.1G041400.1.p	complete	477	8	-;;Protein kinase domain;;Serine/threonine-protein kinase, active site;;Protein kinase-like domain	CNT0030537	none	0.560796
c43644/f1p0/2517	2467	1	Seita.7G062700.1.p	complete	477	9	-;;Protein kinase-like domain;;Serine/threonine-protein kinase, active site;;Protein kinase domain;;Serine-threonine/tyrosine-protein kinase catalytic domain	CNT0029164	none	0.305281
c19408/f1p0/1514	1515	1	Sevir.2G240000.1.p	complete	477	6	-;;Cytochrome P450, conserved site;;Cytochrome P450	N/A	(GTTT)n	5.60862
c7785/f1p0/7594	7318	1	Sobic.001G148400.1.p	complete	477	3	Sodium/calcium exchanger membrane region	CNT0028320	(TTTTTA)n,(CGA)n,(TGGCGC)n,hAT-3_SBi,(CTG)n	0.0446987
c21971/f1p0/1463	1430	1	Sobic.001G393300.1.p	5prime_partial	477	2	-	CNT0016202	none	0.0879704
c30474/f1p0/637	637	1	Sobic.001G520800.1.p	5prime_partial	477	2	-;;Acetyl-ornithine/Acetyl-lysine deacetylase	N/A	none	28.4209
c6841/f1p0/2668	2287	1	Sobic.003G224100.1.p	complete	477	3	GH3 family;;Jasmonic acid-amido synthetase JAR1	N/A	(TGCAT)n,(A)n	2.08756
c18020/f1p1/1530	1530	1	Sobic.005G143900.1.p	complete	477	8	Regulator of chromosome condensation 1/beta-lactamase-inhibitor protein II;;Regulator of chromosome condensation, RCC1	CNT0009303	none	5.28541
c16006/f1p1/6867	6841	N/A	Zm00008a033536_P01	complete	477	1	Reverse transcriptase zinc-binding domain	N/A	LINE1-27_SBi	0
c17970/f1p0/3317	3317	N/A	29739.m003634	complete	480	12	Fungal G-protein, alpha subunit;;Guanine nucleotide binding protein (G-protein), alpha subunit;;P-loop containing nucleoside triphosphate hydrolase	N/A	none	0
c28589/f1p0/3565	3560	N/A	LOC_Os11g47240.1	complete	480	7	Protein kinase domain;;Protein kinase-like domain;;Serine-threonine/tyrosine-protein kinase catalytic domain	CNT0027291	(GGCCGGC)n	0.165002
c15359/f1p0/2437	2461	1	Sevir.6G207800.1.p	complete	480	10	EGF-like calcium-binding domain;;EGF-type aspartate/asparagine hydroxylation site;;EGF-like calcium-binding, conserved site;;EGF-like domain	CNT0026228	Copia-69_SB-LTR	2.93938
c14407/f1p0/3496	3327	N/A	Sevir.8G056300.1.p	complete	480	5	Leucine-rich repeat domain, L domain-like	CNT0025593	(A)n	0.072158
c22172/f1p0/3750	3709	1	Sobic.001G491700.1.p	5prime_partial	480	1	Pentatricopeptide repeat	N/A	none	0
c10076/f1p0/2472	2460	1	Sobic.002G173300.1.p	complete	480	6	BURP domain	N/A	(A)n	0.965712
c38002/f1p0/2667	2667	1	Sobic.003G033100.1.p	complete	480	8	-;;(Uracil-5)-methyltransferase family;;S-adenosyl-L-methionine-dependent methyltransferase;;RNA methyltransferase TrmA, conserved site	CNT0014341	none	0.569103
c44857/f1p0/2357	2357	N/A	Sobic.003G113800.1.p	complete	480	6	-;;Protein kinase domain;;Protein kinase-like domain	CNT0022702	(CAACA)n,(TCCA)n,(CAC)n	0.0683331
c37648/f1p2/1201	1201	1	Sobic.003G284800.1.p	5prime_partial	480	10	-;;4Fe-4S ferredoxin-type, iron-sulphur binding domain;;DnaJ domain;;3Fe-4S ferredoxin	CNT0018738	none	4.74077
c6947/f1p0/3971	3983	1	Sobic.003G399100.1.p	complete	480	3	-;;Pentatricopeptide repeat	CNT0009484	(CCGCCT)n	0.522832
c38384/f1p2/2552	2525	1	Sobic.006G195800.1.p	complete	480	6	-;;ABC transporter type 1, transmembrane domain	CNT0029359	RLG_scIvana_6_1-LTR,GA-rich	1.44551
c20972/f2p3/950	950	1	Zm00008a010971_P01	5prime_partial	480	3	Protein of unknown function DUF393	N/A	none	8.06155
c3202/f1p0/2400	2423	1	GRMZM2G142544_P01	complete	483	9	-;;Concanavalin A-like lectin/glucanase domain;;Protein kinase-like domain;;Protein kinase domain;;Serine-threonine/tyrosine-protein kinase catalytic domain	N/A	none	0.463776
c13611/f1p0/2321	2312	N/A	Sobic.002G062000.1.p	complete	483	4	-	CNT0027729	(GAA)n,(CGA)n	1.92533
c15932/f1p0/626	625	N/A	Sobic.009G250000.1.p	5prime_partial	483	N/A	N/A	N/A	(CCG)n	0.237239
c17185/f1p0/2675	2640	N/A	KXG36737.1	5prime_partial	486	2	-	N/A	none	0.312666
c17313/f1p0/889	886	1	LOC_Os03g21210.1	5prime_partial	486	2	-	N/A	LINE1-7_SBi	0.113615
c14280/f1p0/5000	5157	1	mrna28906.1-v1.0-hybrid	complete	486	3	-;;Retrotransposon gag domain	CNT0021343	Gypsy-42_SB-I	0.0223276
c38344/f1p0/2412	2414	N/A	Pahal.B02216.1	complete	486	1	-	lincRNA300_PMID_24635777	(TTGT)n,STOWAWAY14_SB,LINE1-66_SBi	0.0724732
c17005/f1p0/6383	6400	1	Pavir.Ab02240.1.p	complete	486	6	-;;TRAF-like;;SIAH-type domain;;Zinc finger, TRAF-type	CNT0019040	none	0.119538
c24634/f1p0/2760	2768	1	Pavir.Ab02537.1.p	complete	486	8	Protein kinase, ATP binding site;;Protein kinase-like domain;;Protein kinase domain;;Concanavalin A-like lectin/glucanase domain	CNT0029164	none	0.135426
c25842/f1p0/4919	4661	1	Seita.2G213000.1.p	complete	486	4	Periplasmic binding protein-like I;;Receptor, ligand binding region	N/A	EnSpm-30_SBi,LATIDU1_TM	0.0660748
c17623/f1p0/5084	4909	1	Sobic.002G091700.1.p	complete	486	3	-;;Mlo-related protein	CNT0006232	(GGA)n,Gypsy-92_SB-LTR,HAZEAN1,(TGGGTG)n,HAZEAN2	0.25156
c16772/f1p0/762	762	1	Sobic.003G213400.2.p	5prime_partial	486	3	-	CNT0031755	none	3.88386
c38194/f1p0/1426	1426	N/A	Vocar.0022s0034.1.p	complete	486	8	-;;Cytochrome P450;;Cytochrome P450, E-class, group I	N/A	none	0.0141183
c31998/f1p0/4020	3967	1	LOC_Os04g49570.1	complete	489	N/A	N/A	N/A	(GCCGT)n	0.0683064
c37775/f1p0/2722	2578	N/A	Pahal.G01836.1	complete	489	3	Carotenoid oxygenase	N/A	none	0.141796
c3377/f1p0/1105	1110	1	Pavir.Ha01588.1.p	complete	489	4	Leucine-rich repeat domain, L domain-like	N/A	none	0.549281
c7937/f1p0/3993	3978	1	Sobic.007G087100.1.p	complete	489	9	Pentatricopeptide repeat	N/A	(T)n	0.237294
c18036/f1p0/1323	1323	1	Sobic.008G008900.1.p	complete	489	8	Staphylococcal nuclease (SNase-like), OB-fold	CNT0011073	none	1.45081
c22486/f1p0/1447	1446	N/A	Bol032070	5prime_partial	492	6	Integrase, catalytic core;;Ribonuclease H-like domain	CNT0019305	Gypsy-72_SB-I,Gypsy-72_SB-LTR	0.464109
c4242/f1p0/3688	3671	1	Brast07G155900.1.p	complete	492	2	-	CNT0021449	(TCCTC)n,LINE1-53_SBi,(GTTTTT)n,LINE1-50_SBi	0.148299
c26130/f1p0/1199	1199	N/A	Cre16.g692800.t1.1	complete	492	5	NADP-dependent oxidoreductase domain;;Aldo/keto reductase	N/A	none	0.083956
c23782/f1p0/2766	2765	N/A	Dusal.0090s00020.1.p	complete	492	6	-;;Aconitase A/isopropylmalate dehydratase small subunit, swivel domain;;Aconitase/3-isopropylmalate dehydratase, swivel	N/A	none	0
c18820/f1p0/3439	3442	1	LOC_Os02g18070.1	complete	492	7	NB-ARC;;P-loop containing nucleoside triphosphate hydrolase	CNT0029546	(GCGA)n,LINE1-47_SBi,HARB-N9_SBi	0.450272
c31718/f1p0/4099	4102	N/A	LOC_Os11g05030.1	complete	492	5	-;;Reverse transcriptase domain	lincRNA658_PMID_24635777	LINE1-12_SBi,LINE1-34_SBi	0.029448
c35855/f1p0/2421	2419	1	Oropetium_20150105_13728A	complete	492	7	-;;NAC domain	CNT0041960	none	3.11838
c5996/f1p0/1606	1624	1	Pavir.Aa00707.1.p	5prime_partial	492	1	-	N/A	(AAGCG)n	0.0258647
c24768/f1p1/3524	3523	N/A	Pavir.J14948.1.p	complete	492	2	-	lincRNA702_PMID_24635777	HARB-6_SBi,(TTCC)n,(GGTGCT)n	0.7029
c26062/f1p0/1320	1411	1	Sevir.2G022200.1.p	complete	492	4	Protein of unknown function DUF1719	N/A	none	0.366258
c19458/f1p0/1135	1134	1	Sobic.001G175500.1.p	5prime_partial	492	N/A	N/A	CNT0021454	none	0.423048
c18496/f1p0/1472	1471	1	Sobic.001G456650.1.p	complete	492	6	-;;Winged helix-turn-helix DNA-binding domain;;Plant methyltransferase dimerisation;;O-methyltransferase COMT-type	N/A	(GCG)n	2.88194
c24337/f1p0/4018	4058	1	Sobic.003G241100.3.p	complete	492	1	Membrane-bound transcription factor site-2 protease	CNT0018858	STOWAWAY1_SB	0.669493
c6803/f1p1/3452	3458	1	Sobic.003G436100.1.p	complete	492	1	-	N/A	(CCCCCAG)n,(ACCACG)n,LINE1-21_SBi	0.151373
c3561/f1p0/1259	1261	1	Sobic.006G130400.1.p	complete	492	3	Proton-dependent oligopeptide transporter family	N/A	none	0.261242
c5686/f1p1/690	690	1	Sobic.007G161500.1.p	5prime_partial	492	2	-	CNT0035178	(TA)n	132.182
c9843/f1p0/2142	2142	1	GRMZM2G021470_P01	5prime_partial	495	3	-	lincRNA45_PMID_24635777	MuDR2_ZM,hAT-N18_SBi	0.0956847
c12462/f1p0/1658	1636	1	GRMZM2G062576_P01	complete	495	5	Leucine-rich repeat domain, L domain-like;;Leucine-rich repeat	CNT0032650	(GTTGGA)n	0.115878
c24740/f1p0/3502	3499	N/A	KXJ96536.1	complete	495	N/A	N/A	N/A	(A)n	0.0172615
c33273/f1p0/3504	3504	N/A	LOC_Os10g36210.1	complete	495	7	-;;Valyl/Leucyl/Isoleucyl-tRNA synthetase, editing domain;;Rossmann-like alpha/beta/alpha sandwich fold;;Aminoacyl-tRNA synthetase, class Ia	N/A	none	0.0287281
c25793/f1p0/1417	1415	1	Oropetium_20150105_09243A	complete	495	1	-	N/A	none	0.014228
c27245/f1p0/1119	1119	N/A	Pavir.Ca00631.2.p	5prime_partial	495	5	-;;Leucine-rich repeat domain, L domain-like;;Leucine-rich repeat-containing N-terminal, plant-type	N/A	none	5.65721
c32664/f1p0/6420	6415	1	Sobic.001G122900.2.p	complete	495	N/A	N/A	N/A	(T)n,(TTTTTCT)n	0.0597934
c22905/f1p0/4315	4234	1	Sobic.004G089300.2.p	complete	495	2	-;;ABC transporter A, ABCA	TCONS_00065783	STOWAWAY14_SB,Gypsy-63_SB-I	0.0846212
c24469/f1p0/2758	2750	1	Sobic.006G193200.2.p	complete	495	1	-	N/A	none	1.03929
c10206/f1p0/2495	2494	1	Sobic.007G015500.1.p	complete	495	6	-;;NAC domain	CNT0041960	none	3.24006
c21141/f1p0/3540	3535	1	Sobic.009G042800.4.p	complete	495	1	-	N/A	(GGC)n	0.495485
c19084/f1p0/4223	4223	N/A	AHYPO_001374-RA	complete	498	2	-	N/A	(GCGCGG)n,A-rich	0
c12554/f1p0/3856	3641	1	GRMZM2G474777_P01	complete	498	5	-;;Leucine-rich repeat-containing N-terminal, plant-type;;Leucine-rich repeat domain, L domain-like	CNT0028450	none	0.16913
c21320/f1p0/2335	2336	1	LOC_Os12g31470.1	complete	498	4	-	CNT0024662	Gypsy-47_SB-I	2.29574
c2786/f1p0/4033	4055	1	Pavir.J13279.1.p	complete	498	N/A	N/A	lincRNA110_PMID_24635777	LINE1-59_SBi,LINE1-5_ZM,LINE1-27_SBi	0.142437
c27271/f1p1/2872	2882	N/A	Seita.7G303200.1.p	complete	498	2	-	N/A	(TCCCC)n	1.2155
c5754/f1p0/5691	5816	1	Sobic.002G129400.4.p	complete	498	6	P-loop containing nucleoside triphosphate hydrolase;;ABC transporter-like	CNT0018927	LINE1-18_SBi,LINE1-47_ZM,STOWAWAY14_SB	0.213384
c22668/f1p1/3292	3306	1	Sobic.006G193200.2.p	complete	498	7	-;;Periplasmic binding protein-like I;;Receptor, ligand binding region	CNT0019489	none	0.724703
c9505/f1p0/5513	5513	N/A	evm_27.model.AmTr_v1.0_scaffold00062.156	complete	501	2	Nucleolar pre-ribosomal-associated protein 1, C-terminal domain	N/A	A-rich	0
c19529/f1p0/1982	1981	1	Pahal.F00255.1	complete	501	9	Cytochrome P450;;Cytochrome P450, E-class, group I	CNT0026075	none	2.00028
c2838/f1p0/4654	4621	1	Pavir.J40670.1.p	complete	501	1	Domain of unknown function DUF4216	CNT0029790	(C)n,(G)n,EnSpm-23_SBi	0.290199
c7539/f1p0/2479	2451	1	Sobic.001G167800.1.p	complete	501	N/A	N/A	N/A	(CCG)n	0.210012
c21684/f1p0/3751	3677	1	Sobic.001G298400.3.p	complete	501	4	-	lincRNA641_PMID_24635777	(CGT)n,(GCCGCGT)n,(CGG)n,(CACCC)n,(TTTC)n,(GCG)n,EnSpm-N12_SBi	0.168609
c2625/f1p0/1135	1138	1	Sobic.002G101800.1.p	5prime_partial	501	5	-;;F-box domain	N/A	none	1.14891
c16564/f1p2/1044	1044	1	Sobic.002G310900.1.p	complete	501	9	C2 domain	N/A	GA-rich	11.4531
c14101/f4p1/1062	1062	1	Sobic.002G310900.1.p	complete	501	9	C2 domain	N/A	GA-rich	16.0738
c21575/f1p1/893	893	1	Sobic.002G310900.1.p	complete	501	9	C2 domain	N/A	GA-rich	151.935
c4862/f1p0/1099	1098	1	Sobic.003G345600.1.p	complete	501	3	-	N/A	none	0.99013
c6575/f1p0/939	935	1	Sobic.007G161500.1.p	5prime_partial	501	1	-	CNT0035178	(TA)n,(GCTT)n	1.67001
c16956/f1p0/1175	1172	1	Sobic.010G255600.1.p	3prime_partial	501	2	-	N/A	none	5.71765
c14167/f1p0/4351	4328	1	Zm00008a038980_P01	complete	501	1	Domain of unknown function DUF4216	CNT0029790	A-rich,GA-rich,EnSpm-41_SBi,EnSpm-23_SBi,(TGTTA)n	0.0331682
c29419/f1p0/2422	2334	1	Bradi1g42980.2.p	complete	504	1	-	N/A	none	0.0470205
c21749/f1p0/3560	3547	1	GSMUA_Achr3P26240_001	complete	504	6	C2 domain;;Phospholipase D family	N/A	(CCG)n	0.462901
c6483/f1p0/5673	5684	N/A	KNG46589.1	complete	504	3	-;;Protein of unknown function DUF3659	N/A	(CGA)n	0.0389618
c16711/f1p0/5556	5557	N/A	Potri.010G092000.1	complete	504	8	Protein kinase-like domain;;Protein kinase domain;;Serine/threonine-protein kinase, active site	N/A	none	0
c30591/f1p0/1812	1813	1	Sobic.002G161400.1.p	complete	504	6	P-loop containing nucleoside triphosphate hydrolase	N/A	none	1.63584
c19437/f1p0/3204	3096	1	Sobic.003G361800.1.p	complete	504	1	-	N/A	Helitron-N1_SBi,Helitron-N10_SBi	0.0600045
c40389/f1p0/1126	1123	1	Sobic.004G268500.1.p	5prime_partial	504	3	Carotenoid oxygenase	N/A	(CGAGGA)n	1.15104
c36722/f1p0/1687	1742	1	Sobic.007G023000.1.p	complete	504	4	-;;Protein of unknown function DUF1719	N/A	none	3.95256
c28970/f1p0/3964	3968	1	Zm00008a016235_P01	complete	504	N/A	N/A	N/A	EnSpm-30_SBi	0.479752
c40092/f1p0/3428	3428	N/A	Glyma.10G269700.1.p	complete	507	3	-;;Amino acid/polyamine transporter I	N/A	none	0.017619
c44823/f1p0/2356	2302	1	Pahal.I03026.3	complete	507	2	-	CNT0027420	(CCACCG)n,(CCCCG)n	0.764342
c33519/f1p0/3273	3316	1	Pavir.Ga01209.1.p	complete	507	7	Protein kinase, ATP binding site;;Serine-threonine/tyrosine-protein kinase catalytic domain;;Protein kinase-like domain;;Protein kinase domain	CNT0030537	(TGC)n	0.116195
c8275/f1p0/6322	6177	1	Pavir.Ia01666.1.p	complete	507	1	UDP-glucose:Glycoprotein Glucosyltransferase	CNT0019269	none	0
c39681/f1p0/3718	3743	1	Pavir.J40036.1.p	complete	507	4	-;;Leucine-rich repeat domain, L domain-like	N/A	none	0.113375
c27543/f1p0/1796	1850	1	Potri.002G210700.1	complete	507	3	Harbinger transposase-derived protein	lincRNA158_PMID_24635777	HARB-5_SBi,HARB2_ZM,HARB-N9_ZM,(AATTTG)n	0.409498
c38057/f1p0/1293	1293	N/A	Pp3c3_1090V3.3.p	complete	507	8	-;;Fructose-1,6-bisphosphatase, active site;;Fructose-1,6-bisphosphatase class 1;;Fructose-1,6-bisphosphatase	N/A	none	0
c32556/f1p0/2471	2470	1	Seita.5G151300.1.p	complete	507	N/A	N/A	N/A	none	1.221
c2880/f1p0/977	988	1	Sobic.009G174700.2.p	complete	507	7	-;;Protein kinase-like domain;;Serine/threonine-protein kinase, active site;;Protein kinase domain	CNT0035716	Gypsy-194_ZM-I	1.1258
c11100/f1p0/5416	5417	1	Bradi4g30570.3.p	complete	510	7	Pentatricopeptide repeat	N/A	none	0.0471389
c33754/f1p0/3567	3538	1	Cucsa.260700.1	complete	510	1	-	N/A	LINE1-62_SBi,LINE1-65_SBi,L1-2_SBi	0.961678
c17954/f1p0/1734	1735	1	LOC_Os08g41070.1	complete	510	3	-;;DNA helicase Pif1-like	CNT0029324	Helitron-N4_SBi	0.0345055
c22863/f1p0/2463	2462	1	LOC_Os11g44014.1	complete	510	3	-;;DNA helicase Pif1-like	CNT0029324	Helitron-5_SBi,Helitron-N4_SBi	0.132269
c24572/f1p0/3227	3218	1	Migut.L00269.1.p	complete	510	3	Coenzyme Q-binding protein COQ10, START domain	N/A	(GCC)n,(A)n	0.174535
c32061/f1p0/3542	3519	N/A	Pahal.E03714.1	complete	510	4	-;;Domain of unknown function DUF4220	N/A	RLG_scMaximus_1_6-LTR	0.379932
c4147/f1p0/2630	2624	N/A	Pavir.J16435.1.p	5prime_partial	510	1	-	CNT0029234	(CCA)n,MuDR-15_SBi,MuDR-14_SBi	4.76425
c5454/f1p1/5443	5441	N/A	Seita.2G004200.1.p	complete	510	3	-;;Reverse transcriptase domain	N/A	Copia-124_SB-LTR,LINE1-16_SBi	0.510113
c3570/f1p0/5902	5903	N/A	Seita.2G004200.1.p	complete	510	3	-;;Reverse transcriptase domain	lincRNA716_PMID_24635777	Copia-124_SB-LTR,LINE1-16_SBi,(T)n,DNA-8-2_SBi,HARB-N2_SB,STOWAWAY1_SB,STOWAWAY21_SB,EnSpm-36_SBi	0.268961
c34320/f1p1/3284	3290	N/A	Seita.2G004200.1.p	complete	510	3	-;;Reverse transcriptase domain	N/A	LINE1-16_SBi	3.76416
c34792/f2p1/1375	1379	N/A	Sevir.2G108100.1.p	5prime_partial	510	7	-;;Late embryogenesis abundant protein, LEA-14;;Immunoglobulin-like fold	N/A	(GAC)n	1.19691
c3032/f1p0/4908	4974	1	Sobic.001G332900.1.p	complete	510	9	PAN/Apple domain;;S-locus glycoprotein domain;;EGF-like domain	N/A	none	0.0602312
c25073/f1p0/4120	4130	1	Sobic.004G020800.3.p	5prime_partial	510	7	-;;Ribosomal RNA adenine methyltransferase KsgA/Erm;;S-adenosyl-L-methionine-dependent methyltransferase	N/A	(CCG)n	0.478232
c23078/f1p1/1446	1445	1	Sobic.006G077400.1.p	complete	510	3	-;;Plastid lipid-associated protein/fibrillin conserved domain	CNT0007577	(GCCG)n	4.94987
c35294/f1p0/1225	1229	1	Sobic.008G066100.1.p	5prime_partial	510	3	-	CNT0002028	none	0.981996
c39900/f1p0/2425	2533	1	Sobic.010G138800.2.p	complete	510	3	EXS, C-terminal	N/A	none	0.51893
c17792/f1p2/3747	3748	N/A	Tp57577_TGAC_v2_mRNA28437	complete	510	3	-;;Reverse transcriptase domain	N/A	Copia-124_SB-LTR,LINE1-16_SBi	0.143689
c32516/f1p0/2728	2727	N/A	Tp57577_TGAC_v2_mRNA28437	complete	510	3	-;;Reverse transcriptase domain	lincRNA92_PMID_24635777	LINE1-16_SBi,DNA-8-2_SBi,HARB-N2_SB,STOWAWAY1_SB	0
c18812/f1p0/1270	1280	1	GRMZM2G069569_P01	complete	513	3	Domain of unknown function DUF1995	lincRNA33_PMID_24635777	none	1.87777
c11009/f1p0/1362	1364	1	GRMZM2G077131_P01	complete	513	4	-	N/A	(CCG)n	4.19598
c38627/f1p0/1164	1164	N/A	orange1.1g027414m	complete	513	4	-;;CDP-alcohol phosphatidyltransferase	N/A	none	0.0172961
c37831/f1p0/2251	2252	N/A	Sevir.5G438100.1.p	complete	513	4	Cullin repeat-like-containing domain;;Exocyst complex component Exo70	N/A	none	0.0625793
c37129/f1p0/4964	4743	1	Sobic.005G072000.1.p	complete	513	4	Leucine-rich repeat domain, L domain-like	N/A	(T)n	0.0974991
c35803/f1p0/1348	1346	1	Sobic.010G242600.1.p	complete	513	4	-;;Domain unknown function DUF295	N/A	none	0.201144
c38146/f1p0/4092	4090	N/A	XP_014657622.1	complete	513	2	-	N/A	GA-rich	0
c29354/f1p1/748	748	1	Zm00008a009517_P01	5prime_partial	513	9	-;;Glycoside hydrolase superfamily;;Glycoside hydrolase, family 14;;Glycoside hydrolase, family 14B, plant;;Glycoside hydrolase, catalytic domain	N/A	none	8.71925
c31803/f1p0/2576	2576	N/A	GSMUA_Achr8P25340_001	complete	516	7	-;;Armadillo-type fold;;Armadillo-like helical;;HEAT, type 2	N/A	none	0.0859702
c18975/f1p0/3536	3549	1	LOC_Os07g43560.1	complete	516	5	-;;Gnk2-homologous domain	CNT0008362	(ATGT)n	1.33056
c10149/f1p0/5662	5667	1	Pahal.E02294.1	5prime_partial	516	4	-;;WD40/YVTN repeat-like-containing domain	N/A	(CGCCGC)n,A-rich	0.0108672
c39809/f1p0/3878	3875	1	Pavir.Ha00402.1.p	complete	516	5	-;;Gnk2-homologous domain	CNT0026983	(ATGT)n	0.94449
c19610/f1p0/1278	1278	1	Sevir.1G046100.3.p	5prime_partial	516	2	-	N/A	(GAG)n,(GCG)n	2.55388
c43031/f1p0/3027	2912	1	Sobic.001G020600.2.p	complete	516	5	-;;Coenzyme Q-binding protein COQ10, START domain	N/A	(GCC)n	0.347382
c30561/f1p0/3505	3509	1	Sobic.001G149100.1.p	complete	516	5	Pentatricopeptide repeat	CNT0012109	Copia-93_SB-LTR	0.0130792
c37654/f1p0/3104	3106	1	Sobic.002G327500.1.p	5prime_partial	516	2	-	CNT0008362	(ATGT)n	1.26253
c36675/f1p0/1235	1237	1	Sobic.004G348400.1.p	5prime_partial	516	6	-;;Non-haem dioxygenase N-terminal domain;;Isopenicillin N synthase-like	N/A	(CG)n	0.406884
c45681/f1p0/2116	2146	1	Sobic.005G175600.1.p	5prime_partial	516	1	-	CNT0008362	(ATGT)n	2.23287
c37393/f1p0/3709	3701	1	Sobic.005G175600.1.p	complete	516	5	-;;Gnk2-homologous domain	CNT0026983	none	0.207744
c40570/f1p1/2591	2597	1	Sobic.006G193200.2.p	complete	516	6	Ionotropic glutamate receptor, L-glutamate and glycine-binding domain;;Ionotropic glutamate receptor	N/A	none	0.0858195
c12647/f1p0/5543	5545	N/A	XP_008193036.1	complete	516	1	-	N/A	(CAA)n,(GCAACA)n,(T)n,(TTATA)n	0
c4589/f1p0/4005	3996	N/A	Zm00008a014906_P01	complete	516	N/A	N/A	CNT0018383	(A)n	0.0545224
c17926/f1p0/5107	5110	1	Zm00008a029155_P01	complete	516	2	-	CNT0018992	Copia-33_BD-I,Helitron-N4_ZM,hAT-N1_SB,(AATATTT)n	0.212545
c38144/f1p0/2484	2435	1	Pavir.Ha00402.1.p	complete	519	1	-	CNT0008539	(ATGT)n	0.768667
c8306/f2p0/836	836	1	Sobic.001G314200.2.p	complete	519	4	Protein CURVATURE THYLAKOID 1;;Cyanobacterial aminoacyl-tRNA synthetase, CAAD domain	CNT0028817	none	35.0274
c42760/f1p1/2448	2447	1	Sobic.003G306200.3.p	complete	519	2	Immunoglobulin-like fold	CNT0025987	(C)n,LINE1-18_SBi,A-rich	2.09076
c12529/f1p0/3826	3843	1	Sobic.010G160700.1.p	complete	519	2	-	N/A	none	0
c35217/f1p0/2418	2418	N/A	Vocar.0019s0005.1.p	complete	519	6	-;;UmuC domain	N/A	none	0
c6269/f1p0/1470	1469	N/A	XP_001797847.1	complete	519	10	Signal transduction histidine kinase, phosphotransfer (Hpt) domain	N/A	(CCTC)n,(C)n,(ACC)n	0.232985
c38897/f1p0/2560	2526	1	Cucsa.031240.1	complete	522	6	Integrase, catalytic core;;Ribonuclease H-like domain	CNT0019305	Gypsy-61_SB-I	0.804956
c19531/f1p0/1492	1492	1	LOC_Os07g45890.1	complete	522	3	-;;Reverse transcriptase zinc-binding domain	N/A	L1-7_ZM	0.288839
c29542/f1p0/1280	1280	1	Pahal.I01158.1	complete	522	8	S-adenosyl-L-methionine-dependent methyltransferase;;TPMT family	CNT0041904	(TG)n	3.36476
c16190/f1p0/1477	1476	1	Pavir.J00172.1.p	complete	522	8	S-adenosyl-L-methionine-dependent methyltransferase;;TPMT family	lincRNA704_PMID_24635777	STOWAWAY15_SB	0.785453
c14768/f1p0/1256	1256	1	Pavir.J03117.1.p	complete	522	3	-	N/A	hAT-13_SBi	2.82508
c21345/f1p0/1388	1390	1	Sobic.001G333300.3.p	complete	522	2	-	CNT0022087	none	0.653794
c38816/f1p0/1054	1054	N/A	Sobic.003G214800.1.p	5prime_partial	522	11	-;;Pentatricopeptide repeat;;Tetratricopeptide-like helical domain	N/A	none	0.113796
c17023/f1p0/2927	2905	N/A	Sobic.003G217000.1.p	complete	522	3	-	N/A	EnSpm-N14_SBi	0.554427
c21478/f1p0/2590	2400	1	Sobic.005G175600.1.p	complete	522	5	-;;Gnk2-homologous domain	CNT0008362	none	0.244465
c31485/f1p0/1319	1319	1	Sobic.006G077400.1.p	complete	522	3	-;;Plastid lipid-associated protein/fibrillin conserved domain	CNT0007577	(GCCG)n	5.52902
c7152/f1p0/1123	1123	N/A	Sobic.006G113000.1.p	complete	522	2	-	CNT0029559	none	1.81068
c16304/f1p0/3381	3378	N/A	XP_003854603.1	complete	522	5	Six-hairpin glycosidase-like;;Six-hairpin glycosidase;;Glycoside hydrolase, family 65, central catalytic	N/A	(CTG)n	0.0357596
c1667/f2p1/5485	5513	N/A	LOC_Os11g05030.1	complete	525	4	-;;Reverse transcriptase zinc-binding domain	CNT0024880	LINE1-46_SBi	0.131539
c14906/f1p0/6255	6373	1	Pahal.D02155.1	complete	525	4	-;;NB-ARC;;P-loop containing nucleoside triphosphate hydrolase	N/A	STOWAWAY17_SB,(TA)n,STOWAWAY13_SB,Copia-19_SB-LTR	0.0748026
c18675/f1p0/2357	2401	1	Pahal.G00502.1	complete	525	8	-;;Zinc finger, CCHC-type	lincRNA147_PMID_24635777	(CGCGCCG)n,Copia29-ZM_LTR,RLG_scAngela_1_1-I	1.4464
c22033/f1p0/1302	1293	N/A	Pavir.Eb00761.1.p	3prime_partial	525	2	-	N/A	none	0.513826
c21175/f1p0/4022	3913	1	Sevir.1G239000.1.p	complete	525	8	Leucine-rich repeat;;Leucine-rich repeat, typical subtype;;Leucine-rich repeat domain, L domain-like	CNT0030362	(A)n	0.163693
c10155/f1p0/1292	1295	1	Sobic.004G190900.1.p	5prime_partial	525	2	-	N/A	none	0.813927
c27037/f1p0/2689	2691	1	Zm00008a029177_P01	complete	525	4	-;;Alpha/Beta hydrolase fold	N/A	(CTCC)n	1.47823
c37119/f1p1/1326	1324	1	Pahal.A01613.1	complete	528	4	-;;Leucine-rich repeat domain, L domain-like	N/A	none	0.378801
c38030/f1p0/2585	2584	N/A	Pavir.J37445.1.p	complete	528	3	Transposase-associated domain	N/A	EnSpm-22_SBi,EnSpm-44_SBi,Copia22-ZM_LTR	1.326
c27025/f1p0/3314	3400	1	Seita.1G000100.1.p	complete	528	8	Protein kinase domain;;Serine/threonine-protein kinase, active site;;Protein kinase-like domain	CNT0026835	none	0.478418
c38056/f1p0/3685	3692	1	Sevir.1G237900.1.p	complete	528	6	Leucine-rich repeat;;Leucine-rich repeat domain, L domain-like	CNT0030362	hAT5_SB	0.138666
c14032/f1p0/5612	5652	1	Sobic.001G148400.1.p	complete	528	5	-	CNT0028320	(TCC)n,(GCGCCG)n,(GCCGTC)n,hAT-3_SBi,(CTG)n,(AAC)n	0.0396749
c6812/f1p0/3744	3736	1	Sobic.002G236500.1.p	complete	528	4	-;;Peptidase S9A, N-terminal domain	CNT0009423	(TGG)n,STOWAWAY13_SB	0.347203
c18998/f1p0/3482	3485	N/A	Sobic.003G021300.1.p	complete	528	2	-	CNT0018974	LINE1-21_SBi	0.338628
c34666/f1p0/2479	2375	1	Sobic.004G026100.4.p	complete	528	6	S-adenosyl-L-methionine-dependent methyltransferase;;tRNA (guanine-N-7) methyltransferase, Trmb type;;tRNA (guanine-N-7) methyltransferase catalytic subunit Trm8, eukaryote	N/A	none	0.256112
c12663/f1p0/10554	10494	1	Sobic.004G073400.1.p	complete	528	7	-;;ABC transporter type 1, transmembrane domain	N/A	(T)n,(AT)n,(TTT)n	0.0127908
c4640/f1p0/1943	1865	1	Sobic.005G005200.2.p	complete	528	3	-	CNT0010141	none	0.20624
c11030/f1p0/1811	1836	1	Sobic.005G072000.1.p	complete	528	4	-;;Leucine-rich repeat domain, L domain-like	N/A	none	1.37482
c31829/f1p0/2450	2458	1	Sobic.009G132000.6.p	5prime_partial	528	3	-	CNT0018020	none	0.485994
c10815/f1p0/3402	3418	1	Sobic.010G017300.2.p	complete	528	4	-;;Leucine-rich repeat domain, L domain-like	N/A	none	0.347521
c25200/f1p0/3494	3496	1	Sobic.010G046700.1.p	complete	528	N/A	N/A	lincRNA193_PMID_24635777	Tourist1c_SB	0.150444
c27820/f1p0/1151	1153	N/A	GRMZM2G017031_P01	5prime_partial	531	2	-	N/A	(CCG)n	1.32704
c12804/f1p0/6156	6054	1	LOC_Os02g40180.1	complete	531	9	Protein kinase domain;;Protein kinase-like domain;;Serine/threonine-protein kinase, active site	CNT0030537	Gypsy-92_SB-I	0.185677
c32183/f1p0/2357	2353	1	Pavir.Fb00986.1.p	complete	531	1	-	N/A	LINE1-61_SBi	0.581819
c36488/f1p0/3986	4002	N/A	Sobic.001G183300.1.p	complete	531	10	-;;Methyl-CpG DNA binding;;DNA-binding domain	N/A	(GTCACGCC)n	0.0373922
c11104/f1p0/5672	5702	N/A	Sobic.004G089300.2.p	complete	531	2	ABC transporter A, ABCA	TCONS_00065783	STOWAWAY14_SB,Gypsy-63_SB-I	0
c10000/f1p0/5576	5568	1	Sobic.004G089300.2.p	complete	531	2	ABC transporter A, ABCA	TCONS_00065783	STOWAWAY14_SB,Gypsy-63_SB-I	0.074051
c6219/f1p2/1222	1227	1	Sobic.005G186700.1.p	5prime_partial	531	6	Peptidase S10, serine carboxypeptidase;;Serine carboxypeptidase, serine active site;;Alpha/Beta hydrolase fold	CNT0016786	none	12.0369
c40394/f1p0/4040	3859	1	Sobic.006G193200.2.p	5prime_partial	531	N/A	N/A	CNT0019489	none	0.121209
c19713/f1p1/754	753	1	Zm00008a040301_P01	5prime_partial	531	7	Protein kinase-like domain;;Protein kinase domain	CNT0030537	none	5.73184
c9903/f1p0/5801	5810	1	Cucsa.031240.1	complete	534	6	Integrase, catalytic core;;Ribonuclease H-like domain	TCONS_00029225	Gypsy-79_SB-I	0.12587
c3797/f1p0/3711	3711	N/A	EME44675.1	complete	534	1	-	N/A	GA-rich	0
c8458/f1p0/2745	2759	1	LOC_Os04g13540.1	complete	534	5	Hemopexin-like repeats;;Hemopexin-like domain	N/A	Copia-23_SB-I,Copia-134_SB-LTR	0.477599
c5545/f1p0/1516	1445	N/A	LOC_Os06g38450.1	complete	534	7	-;;Cathepsin propeptide inhibitor domain (I29);;Peptidase C1A	N/A	(GCG)n	0.09208
c11743/f1p0/5770	5769	1	LOC_Os06g49390.1	complete	534	4	-;;Leucine-rich repeat domain, L domain-like	CNT0030930	none	0.188629
c17600/f1p0/1117	1116	N/A	OAL50208.1	complete	534	1	-	N/A	(CACACGTT)n,(GGC)n,(ACG)n	0.0902
c11063/f2p1/1223	1223	1	Seita.1G321800.1.p	complete	534	3	Transcription termination factor, mitochondrial/chloroplastic	N/A	none	7.88974
c12395/f1p0/2446	2450	1	Seita.1G321800.1.p	complete	534	3	Transcription termination factor, mitochondrial/chloroplastic	N/A	none	1.14999
c10100/f1p1/1472	1472	1	Seita.1G321800.1.p	complete	534	3	Transcription termination factor, mitochondrial/chloroplastic	N/A	none	0.689065
c38320/f1p0/803	803	N/A	Sevir.1G100400.1.p	5prime_partial	534	2	-	N/A	(GGC)n	16.3421
c37074/f1p1/7006	7010	1	Sobic.001G381900.3.p	complete	534	5	-	CNT0017848	(T)n,MuDR-9_ZM,(CGCGC)n	0.0506434
c35627/f1p0/1462	1461	1	Sobic.002G327500.1.p	5prime_partial	534	8	-;;Serine-threonine/tyrosine-protein kinase catalytic domain;;Protein kinase, ATP binding site;;Protein kinase domain;;Concanavalin A-like lectin/glucanase domain;;Protein kinase-like domain	CNT0008539	none	3.61982
c13136/f1p0/3543	3624	1	Sobic.002G396500.1.p	complete	534	3	Transcription-associated protein 1;;Armadillo-type fold	CNT0027323	(ATCAAG)n	5.5544
c30423/f1p0/4804	4761	1	Sobic.004G015500.1.p	complete	534	N/A	N/A	N/A	none	0
c12837/f1p0/2689	2587	N/A	Sobic.006G071362.1.p	complete	534	6	ABC transporter-like;;P-loop containing nucleoside triphosphate hydrolase;;ABC transporter, conserved site	CNT0000772	none	0.59145
c12922/f2p0/1643	1639	1	Sobic.007G046100.1.p	complete	534	7	-;;Protein kinase domain;;Protein kinase-like domain	CNT0011566	(GGC)n,(TCA)n	6.46278
c29520/f1p1/3884	3878	1	Zm00008a038980_P01	complete	534	3	Transposon, En/Spm-like	CNT0029790	EnSpm-23_SBi	0.130345
c1683/f3p0/2600	2600	1	Aco005713.1	complete	537	17	Zinc finger, CCHC-type;;Zinc knuckle CX2CX4HX4C	N/A	(CCG)n	5.46309
c23757/f1p0/5004	4877	1	Brast01G090400.1.p	complete	537	5	-;;P-loop containing nucleoside triphosphate hydrolase	CNT0029359	(CCTCG)n	0.0920112
c7064/f1p0/4050	3833	1	Pahal.D01085.1	complete	537	8	-;;Protein kinase domain;;Serine/threonine-protein kinase, active site;;Protein kinase-like domain	lincRNA566_PMID_24635777	none	0.137547
c12414/f1p0/15464	15394	1	Pavir.J12683.1.p	complete	537	2	-;;Leucine-rich repeat domain, L domain-like	N/A	(T)n	0.022047
c30478/f1p0/1721	1712	1	Sobic.007G046100.1.p	complete	537	7	-;;Protein kinase domain;;Protein kinase-like domain	CNT0011566	(TCA)n	2.5455
c32404/f1p0/6351	6101	1	Sobic.010G242000.1.p	complete	537	4	Leucine-rich repeat domain, L domain-like	CNT0028450	(GGTGT)n,(T)n,(A)n	0
c18181/f1p0/3837	3836	N/A	Bol007647	5prime_partial	540	3	GPI transamidase component PIG-T	N/A	none	0
c8692/f1p0/3350	3357	N/A	Seita.4G006100.2.p	complete	540	5	-;;Homeobox domain-like	N/A	(CGG)n,LINE1-44_SBi,LINE1-9_SBi	0.631646
c33018/f1p0/1040	1041	N/A	Sevir.5G198800.1.p	5prime_partial	540	5	HotDog domain;;MaoC-like domain	CNT0019547	none	0.324979
c8439/f1p0/4419	4572	1	Sobic.002G154000.3.p	complete	540	N/A	N/A	N/A	none	0.365147
c19880/f1p0/3813	3814	1	Sobic.003G210000.2.p	complete	540	5	-;;Mg2+ transporter protein, CorA-like/Zinc transport protein ZntB	CNT0022374	EnSpm-14_ZM,LINE1-49_SBi	0.736485
c16463/f1p0/985	930	N/A	Sobic.007G195300.3.p	5prime_partial	540	4	HotDog domain	N/A	none	1.10405
c35339/f1p0/1564	1564	N/A	Vocar.0002s0098.1.p	complete	540	6	-;;Proteasome, subunit alpha/beta;;Proteasome endopeptidase complex, beta subunit;;Nucleophile aminohydrolases, N-terminal	N/A	(CATC)n	0
c1640/f2p0/2388	2388	N/A	XP_007745555.1	complete	540	1	-	N/A	none	0.1096
c5372/f1p0/681	680	N/A	Zm00008a024695_P01	5prime_partial	540	1	-	N/A	none	4.06937
c21310/f1p0/4213	3890	1	Pavir.Ab03130.1.p	complete	543	7	-;;Ionotropic glutamate receptor;;Ionotropic glutamate receptor, L-glutamate and glycine-binding domain	N/A	A-rich,(A)n	0.155355
c8967/f1p0/3501	3529	1	Seita.9G374100.2.p	5prime_partial	543	1	-	N/A	(CCCTCC)n	0.685824
c31288/f1p1/656	657	1	Sobic.002G271200.1.p	5prime_partial	543	11	NAD(P)-binding domain;;Nucleotide sugar epimerase	N/A	none	3.58049
c15106/f1p0/6345	5922	1	Sobic.004G073400.1.p	complete	543	6	ABC transporter type 1, transmembrane domain	CNT0036270	(CGGCG)n,DNA-5_SBi,RTE-1_SBi	0.0576655
c6774/f1p0/1241	1208	1	Sobic.004G283100.1.p	complete	543	2	-	N/A	none	0.253014
c28805/f1p0/3542	3587	1	Bradi1g25600.1.p	5prime_partial	546	5	-;;Gnk2-homologous domain	CNT0008362	(ATGT)n	1.24413
c37658/f1p1/1372	1371	1	Bradi4g17885.1.p	complete	546	3	-;;Reverse transcriptase zinc-binding domain	CNT0018967	none	1.82257
c35130/f1p0/2362	2389	N/A	GRMZM2G027351_P02	complete	546	20	EF-hand domain;;EF-Hand 1, calcium-binding site;;EF-hand domain pair	lincRNA672_PMID_24635777	none	0.0411308
c36083/f1p0/1576	1577	1	GRMZM2G124473_P02	complete	546	3	-;;Plastid lipid-associated protein/fibrillin conserved domain	CNT0007577	(GCCG)n	3.76844
c22353/f1p0/1238	1238	1	GRMZM2G414537_P01	complete	546	1	-	N/A	none	16.1822
c4154/f1p0/3724	3673	1	Seita.1G288500.1.p	5prime_partial	546	2	-	N/A	(A)n	0.0111762
c35401/f1p2/2555	2569	1	Sevir.1G120500.3.p	complete	546	5	-;;Pentacotripeptide-repeat region of PROPR	N/A	none	0.31724
c11718/f1p0/5461	5449	N/A	Sobic.001G366900.1.p	complete	546	3	-	CNT0026242	EnSpm-N19_SBi	0.140088
c7434/f1p1/1508	1510	1	Sobic.004G131700.1.p	complete	546	5	-;;F-box domain	N/A	none	7.75863
c10280/f1p0/14558	14457	1	Sobic.008G132900.1.p	complete	546	1	-	lincRNA474_PMID_24635777	none	0.0476411
c11175/f1p0/1889	1884	N/A	Sobic.010G165700.1.p	complete	546	7	Nucleic acid-binding, OB-fold;;Domain of unknown function DUF223	N/A	(GCC)n,Helitron-N4_SBi	0.118836
c19648/f1p0/3080	3079	N/A	XP_007828823.1	complete	546	4	Cyclin PHO80-like	N/A	(CACC)n,(GAC)n	0.0457709
c31638/f1p0/2928	2713	1	Zm00008a021435_P01	complete	546	5	Pentacotripeptide-repeat region of PROPR	N/A	none	0.0995557
c15762/f1p0/792	792	1	GRMZM2G106556_P01	5prime_partial	549	1	-	CNT0030390	none	24.2087
c18042/f1p0/2582	2483	1	LOC_Os02g35820.1	complete	549	4	-;;Retrotransposon gag domain	N/A	Gypsy-40_SB-LTR,Gypsy-40_SB-I	0.240845
c34309/f1p0/4533	4115	1	Pahal.C01519.2	complete	549	2	-;;Wall-associated receptor kinase, galacturonan-binding domain	CNT0029442	none	0.0545996
c34909/f1p0/3162	3106	1	Pavir.Eb00377.1.p	5prime_partial	549	N/A	N/A	N/A	(TCTTT)n	0.243278
c9369/f1p0/3713	3681	1	Seita.4G231200.1.p	complete	549	6	Leucine-rich repeat domain, L domain-like;;Leucine-rich repeat	lincRNA566_PMID_24635777	none	0.106313
c24738/f1p0/2783	2770	1	Sobic.001G020600.2.p	5prime_partial	549	6	START-like domain;;Coenzyme Q-binding protein COQ10, START domain	N/A	none	0.457919
c27546/f1p0/1090	1087	1	Sobic.001G104600.1.p	5prime_partial	549	2	-;;Peroxiredoxin-like FAM213/AAED1	CNT0022586	none	1.43701
c15906/f1p2/667	667	1	Sobic.002G025700.1.p	5prime_partial	549	6	-;;Protein kinase domain;;Protein kinase-like domain	CNT0027209	none	16.1648
c14409/f1p0/4177	3895	1	Sobic.006G193200.2.p	complete	549	5	-;;Periplasmic binding protein-like I;;Receptor, ligand binding region	N/A	STOWAWAY11_SB,A-rich	0.0105159
c28015/f1p0/3895	3895	N/A	Vocar.0022s0092.2.p	complete	549	4	Armadillo-type fold;;Armadillo-like helical	N/A	(CACCA)n	0.0155065
c20762/f1p0/2124	2123	1	Zm00008a004411_P01	complete	549	N/A	N/A	CNT0017333	(CGGCAGC)n,Helitron-2_SBi,HARB-N31_SBi	0.901308
c9048/f1p0/4056	3963	1	AC216264.3_FGP001	complete	552	5	Peptidase S10, serine carboxypeptidase;;Alpha/Beta hydrolase fold	CNT0026795	A-rich,(TGC)n	0.0102316
c28363/f1p1/2328	2348	1	LOC_Os03g29600.1	complete	552	2	-	CNT0032409	HARB-11_SBi	1.37435
c37569/f1p0/2393	2391	N/A	Lus10009696	complete	552	13	Ankyrin repeat-containing domain;;Ankyrin repeat	N/A	(AGCAGT)n	0
c34961/f1p0/1302	1299	1	Pahal.C00907.1	5prime_partial	552	4	-	N/A	(CGC)n	0.654266
c24662/f1p0/3431	3504	1	Seita.7G062700.1.p	complete	552	8	-;;EGF-like calcium-binding domain;;EGF-like calcium-binding, conserved site	CNT0029164	none	0.165787
c5807/f1p0/3590	3603	1	Sobic.002G236500.1.p	complete	552	7	Peptidase S9A, prolyl oligopeptidase;;Alpha/Beta hydrolase fold;;Peptidase S9, prolyl oligopeptidase, catalytic domain	CNT0009423	none	0.162161
c22919/f1p1/3082	3083	1	Sobic.003G306200.3.p	complete	552	7	Hemimethylated DNA-binding domain;;UVR domain	CNT0018539	(T)n,LINE1-18_SBi	0.595816
c6078/f1p0/780	786	1	Sobic.003G315000.4.p	complete	552	6	RNA recognition motif domain;;Nucleotide-binding alpha-beta plait domain	N/A	none	1.8186
c11661/f1p0/3673	3616	N/A	Sobic.005G220800.1.p	complete	552	4	Leucine-rich repeat domain, L domain-like	CNT0026835	(A)n	0.414729
c30261/f1p0/1277	1278	1	Sobic.006G111600.1.p	5prime_partial	552	7	-;;P-loop containing nucleoside triphosphate hydrolase;;ATPase, AAA-type, core;;ATPase, AAA-type, conserved site	N/A	none	12.9818
c24173/f1p0/3414	3401	1	Sobic.006G193200.2.p	complete	552	5	-;;Receptor, ligand binding region;;Periplasmic binding protein-like I	N/A	STOWAWAY11_SB	0.402272
c17987/f1p0/1197	1194	1	Sobic.006G254800.1.p	complete	552	7	-;;Ubiquitin domain;;Ubiquitin-related domain	CNT0020103	none	3.00135
c17618/f1p0/3548	3482	1	Sobic.008G167200.1.p	complete	552	7	-;;Protein kinase domain;;Protein kinase-like domain;;Serine-threonine/tyrosine-protein kinase catalytic domain	CNT0029641	(TTCCT)n	1.27673
c26729/f1p0/1075	1074	1	Zm00008a035383_P01	complete	552	5	-;;CCT domain	CNT0027502	(GGAGTG)n,(GCTCCG)n	13.5748
c16616/f1p0/5467	5448	1	GRMZM2G159632_P01	complete	555	8	-;;STAS domain;;SLC26A/SulP transporter	CNT0021145	Gypsy-92_SB-I	0.0976084
c35062/f1p0/2478	2476	1	Seita.7G062700.1.p	complete	555	9	Protein kinase-like domain;;Protein kinase domain;;Serine/threonine-protein kinase, active site	CNT0029164	none	0.408205
c38023/f1p0/3472	3512	1	Sobic.002G091700.1.p	complete	555	3	-;;Mlo-related protein	CNT0006232	DNA-5_SBi,HARB-N9_SBi,STOWAWAY1_SB	0.102844
c8660/f1p0/3546	3543	1	Sobic.002G351200.2.p	5prime_partial	555	4	Alpha/Beta hydrolase fold	CNT0020743	none	0.854557
c15998/f1p0/3436	3418	1	Sobic.003G276300.1.p	complete	555	6	C2 domain;;Phospholipase D family	N/A	(CCG)n	0.274564
c35889/f1p0/3497	3504	1	Sobic.003G276300.1.p	complete	555	6	-;;C2 domain;;Phospholipase D family	N/A	(CGCC)n	1.17896
c38893/f1p0/3673	3610	1	Sobic.006G193200.2.p	complete	555	5	-;;Periplasmic binding protein-like I;;Receptor, ligand binding region	CNT0019489	none	0.552916
c23097/f1p0/805	805	1	Sobic.007G161500.1.p	5prime_partial	555	3	-	CNT0035178	(TGCT)n	43.9126
c32573/f1p0/865	865	N/A	Sobic.010G133700.1.p	complete	555	2	-	N/A	(TCG)n,(GCTCCG)n	1.11719
c1712/f2p0/5597	5607	N/A	Cucsa.031240.1	complete	558	3	-	CNT0018902	Gypsy-115_SB-I,Gypsy-44_SB-I	0.143625
c35806/f1p0/1327	1329	N/A	DCAR_002056	complete	558	4	PRELI/MSF1 domain	N/A	none	0.439313
c22828/f1p0/1327	1330	1	GRMZM2G057820_P03	complete	558	5	-;;Ferroporti-1;;Major facilitator superfamily domain	CNT0024047	none	1.28414
c7078/f1p0/5272	5346	1	LOC_Os08g12740.1	complete	558	5	NB-ARC;;P-loop containing nucleoside triphosphate hydrolase	N/A	(TCTCA)n,Helitron-N11_SBi,(T)n,HARB-N28_SBi,(AT)n	0.219969
c24619/f1p0/2258	2231	1	Pahal.C03637.1	complete	558	3	-;;Transposase-associated domain	CNT0029790	(GCTGGCA)n,EnSpm-41_SBi	0.114165
c25162/f1p0/3890	3887	1	Seita.4G231800.1.p	complete	558	5	-;;Leucine-rich repeat domain, L domain-like;;Leucine-rich repeat	lincRNA566_PMID_24635777	none	0.053775
c10217/f1p0/2250	2251	1	Seita.7G159500.3.p	complete	558	4	Serine incorporator/TMS membrane protein	N/A	(GCG)n	0.0357755
c9026/f1p0/2648	2558	1	Sobic.003G059300.1.p	5prime_partial	558	6	-;;Leucine-rich repeat-containing N-terminal, plant-type;;Leucine-rich repeat domain, L domain-like	CNT0032650	none	0.407571
c34999/f1p0/2472	2462	1	Sobic.004G059800.1.p	complete	558	2	-	CNT0009898	none	0.37413
c5167/f1p0/1154	1156	1	Zm00008a020223_P01	5prime_partial	558	8	CheY-like superfamily;;Signal transduction response regulator, receiver domain	N/A	none	1.72745
c12694/f1p0/1317	1380	1	Pahal.C02754.1	complete	561	10	Aldo/keto reductase;;Aldo/keto reductase, conserved site;;NADP-dependent oxidoreductase domain	CNT0027783	none	0.330787
c4582/f1p0/1533	1496	1	Pavir.Ia03595.1.p	complete	561	6	-;;PPM-type phosphatase domain;;Protein phosphatase 2C family	N/A	(GGC)n,EnSpm-N39_SBi	0.0754682
c17036/f1p4/2277	2277	1	Pavir.Ib01401.1.p	complete	561	4	-;;HAT, C-terminal dimerisation domain;;Ribonuclease H-like domain	TCONS_00063477	hAT-3_SBi	9.00491
c35036/f1p4/2440	2440	1	Pavir.Ib01401.1.p	complete	561	4	-;;HAT, C-terminal dimerisation domain;;Ribonuclease H-like domain	TCONS_00063477	hAT-3_SBi	0.417906
c14629/f5p5/2577	2577	1	Pavir.Ib01401.1.p	complete	561	4	-;;HAT, C-terminal dimerisation domain;;Ribonuclease H-like domain	TCONS_00063477	hAT-3_SBi	5.11919
c22760/f1p3/2810	2809	1	Pavir.Ib01401.1.p	complete	561	4	-;;HAT, C-terminal dimerisation domain;;Ribonuclease H-like domain	TCONS_00063477	hAT-3_SBi	4.81602
c11732/f1p0/1268	1269	1	Pavir.J23088.2.p	5prime_partial	561	2	-	N/A	LINE1-53_SBi,LINE1-50_SBi	0.321668
c39013/f1p0/2664	2488	1	Sobic.001G003200.4.p	complete	561	N/A	N/A	N/A	none	0.0404646
c17691/f1p0/1485	1484	1	Sobic.002G239300.1.p	5prime_partial	561	2	-	N/A	(TC)n	1.27836
c3879/f1p0/1306	1309	N/A	Sobic.006G089900.1.p	5prime_partial	561	2	-	N/A	LINE1-3_SBi	0.297361
c12721/f1p0/4062	4037	1	Sobic.008G171500.6.p	complete	561	1	-	N/A	(CCGCG)n,(TAA)n	0.120652
c23979/f1p0/4116	3936	1	Sobic.009G131200.2.p	complete	561	1	-	N/A	G-rich	0.884895
c22752/f1p0/1111	1111	1	Zm00008a001190_P01	complete	561	9	PPM-type phosphatase domain;;Protein phosphatase 2C family	N/A	(CCTT)n,GA-rich	3.88429
c7398/f1p2/1644	1645	1	GRMZM2G124473_P02	complete	564	3	-;;Plastid lipid-associated protein/fibrillin conserved domain	CNT0007577	(GCCG)n,LINE1-32_SBi	1.43207
c33949/f1p0/2464	2402	1	LOC_Os07g43560.1	complete	564	4	-	CNT0026983	(A)n	0.237221
c4209/f1p0/5151	4883	1	Pahal.C02488.2	complete	564	5	-;;Cation-transporting P-type ATPase, C-terminal;;P-type ATPase, transmembrane domain	CNT0027913	(GAGGCGCA)n	0.0659174
c8492/f1p6/1409	1408	1	Pahal.J00679.1	complete	564	4	-;;Uncharacterised protein family Ycf36	CNT0008331	(GCCGCG)n	0.531035
c648/f18p14/2800	2800	1	Pavir.Ib01401.1.p	complete	564	5	-;;Leucine-rich repeat domain, L domain-like	TCONS_00063477	hAT-3_SBi	39.2084
c33954/f1p3/2676	2683	1	Pavir.Ib01401.1.p	complete	564	5	-;;Leucine-rich repeat domain, L domain-like	CNT0018141	hAT-3_SBi	2.73329
c22573/f1p2/1445	1445	N/A	Seita.3G259900.1.p	complete	564	2	-;;Myb/SANT-like domain	N/A	(GCC)n,(CCG)n	0.256859
c12331/f1p0/1124	1126	1	Sobic.001G298600.1.p	complete	564	6	-;;Ribosomal protein L18	CNT0015212	(CCGCG)n	4.02295
c3970/f3p1/1085	1085	1	Sobic.007G204100.1.p	complete	564	2	-	N/A	(GGC)n	0.343879
c34758/f1p0/1164	1163	N/A	Sobic.010G061500.1.p	complete	564	5	-;;Leucine-rich repeat domain, L domain-like	N/A	none	1.14252
c31928/f1p0/4234	4234	N/A	Cagra.6845s0037.1.p	5prime_partial	567	7	-;;Rab-GTPase-TBC domain;;Ecotropic viral integration site 5 protein	N/A	(AAT)n,(CTTTTT)n	0
c21277/f1p0/1768	1771	1	Pahal.D00079.1	complete	567	5	Alpha/Beta hydrolase fold;;Carboxylesterase, type B	CNT0009227	(GCGG)n	0.451117
c4382/f1p0/1306	1306	N/A	Pp3c4_8970V3.2.p	complete	567	8	-;;JAB1/MPN/MOV34 metalloenzyme domain;;Rpn11/EIF3F, C-terminal	CNT0043560	none	0.0154155
c32331/f1p0/1689	1687	1	Sobic.004G237800.1.p	complete	567	5	-;;Nucleotide-diphospho-sugar transferases;;Glycosyl transferase, family 8;;Plant galacturonosyltransferase GAUT	CNT0024490	none	3.63912
c30929/f1p0/2636	2624	1	Sobic.009G196700.1.p	complete	567	7	-;;Cytochrome P450, E-class, group I;;Cytochrome P450	CNT0026075	Copia-106_SB-LTR	8.53182
c25068/f1p0/2044	2040	1	Sobic.009G259800.1.p	complete	567	6	-;;Zinc finger, RING-type;;Zinc finger, RING/FYVE/PHD-type	N/A	hAT-N12_SBi,(CGCCGTC)n,(AGG)n	0.325675
c24885/f1p0/1342	1343	1	Sobic.010G039500.3.p	complete	567	7	-;;HAD-like domain;;HAD hydrolase, subfamily IA	N/A	none	0.657686
c38157/f1p0/2681	2681	N/A	Vocar.0004s0229.1.p	complete	567	7	-;;Protein kinase-like domain;;Protein kinase domain;;Calcium/calmodulin-dependent/calcium-dependent protein kinase	N/A	none	0
c26249/f1p0/1265	1265	1	Zm00008a011261_P01	complete	567	N/A	N/A	N/A	HARB-N11_SBi	5.08496
c39182/f1p0/2376	2375	1	Bradi4g09250.1.p	5prime_partial	570	2	-	lincRNA705_PMID_24635777	LINE1-62_SBi	0.220648
c32996/f1p0/2578	2574	N/A	GRMZM2G043501_P01	complete	570	3	Malonyl-CoA decarboxylase	N/A	(CGC)n,GA-rich	0.653079
c17626/f1p0/2446	2462	N/A	KXS99288.1	5prime_partial	570	2	-;;Transcription factor Aft1, osmotic stress domain	N/A	(ACA)n	0.130838
c16190/f1p0/4801	4677	1	LOC_Os02g40200.1	complete	570	9	Protein kinase domain;;Serine/threonine-protein kinase, active site;;Protein kinase-like domain	CNT0030537	Gypsy29-ZM_I-int,A-rich	0.0740971
c17470/f1p0/2716	2677	N/A	Seita.2G004200.1.p	complete	570	1	-	N/A	Copia-124_SB-LTR	0.276573
c36857/f1p0/15417	15004	1	Seita.3G329400.1.p	complete	570	1	-	CNT0018907	(CGG)n,ZhAT5_ZM,EnSpm-16_SBi,EnSpm-N12_SBi	0
c11071/f1p2/1381	1392	1	Seita.6G033500.1.p	complete	570	9	Protein kinase domain;;Concanavalin A-like lectin/glucanase domain;;Protein kinase-like domain;;Protein kinase, ATP binding site	N/A	none	0.661362
c21868/f1p0/1126	1081	N/A	Sobic.001G082500.2.p	complete	570	5	-;;Cytochrome P450	N/A	(TCC)n	0.0509018
c2698/f1p1/2525	2531	1	Sobic.001G167800.1.p	complete	570	4	-	N/A	none	1.4854
c18954/f1p0/1185	1184	1	Sobic.001G389900.1.p	complete	570	8	Major intrinsic protein;;Aquaporin-like;;Aquaporin transporter	CNT0021420	(CCGACC)n,GA-rich	0.989794
c30570/f1p1/1465	1470	1	Sobic.002G347000.1.p	complete	570	N/A	N/A	CNT0031418	(CGC)n	2.0628
c29559/f1p0/1270	1270	1	Sobic.004G133100.1.p	complete	570	4	-;;Alpha/Beta hydrolase fold	CNT0014340	none	5.53001
c25172/f1p0/1190	1191	1	Sobic.004G288900.3.p	5prime_partial	570	6	-;;Serine-threonine/tyrosine-protein kinase catalytic domain;;Protein kinase domain;;Protein kinase-like domain	N/A	none	0.634332
c38425/f1p0/2260	2404	1	Pahal.A01808.1	complete	573	7	-;;Protein kinase-like domain;;Protein kinase domain	N/A	none	0.272827
c7313/f1p0/1115	1122	1	Pahal.F01792.2	complete	573	8	Protein kinase domain;;Serine/threonine-protein kinase, active site;;Protein kinase-like domain	CNT0032252	none	0.241887
c13690/f1p0/2713	2707	N/A	Pavir.J16435.1.p	complete	573	3	-;;MULE transposase domain	CNT0029234	(CCA)n,MuDR-15_SBi	0.715749
c19213/f1p0/1567	1569	1	Sevir.2G149600.2.p	5prime_partial	573	3	-;;Wall-associated receptor kinase, galacturonan-binding domain	N/A	CACTAN1_ZM	1.40431
c34362/f1p0/2308	2280	1	Sobic.001G089800.1.p	complete	573	6	-;;Iron hydrogenase, large subunit, C-terminal;;Iron hydrogenase	N/A	(T)n	1.61033
c42194/f1p0/2631	2533	1	Sobic.003G192400.1.p	complete	573	4	Concanavalin A-like lectin/glucanase domain;;Protein kinase-like domain	CNT0018528	GA-rich,A-rich	0.0274148
c35948/f1p0/2641	2648	N/A	Sobic.003G317400.1.p	complete	573	5	-;;Diacylglycerol kinase, catalytic domain;;NAD kinase/diacylglycerol kinase-like domain	CNT0018685	(CGCGGC)n	0.358661
c36740/f1p0/1299	1402	1	Sobic.008G066100.1.p	5prime_partial	573	1	-	N/A	none	0.0723989
c5870/f1p1/5296	5294	N/A	Zm00008a006120_P01	complete	573	3	-;;Reverse transcriptase zinc-binding domain	CNT0020251	LINE1-27_SBi	0.538614
c43114/f1p0/4233	4267	N/A	Bradi3g21431.1.p	complete	576	3	-;;Ulp1 protease family, C-terminal catalytic domain	N/A	(T)n	0.0336127
c32144/f1p1/3652	3753	1	GRMZM2G026639_P01	5prime_partial	576	1	-	N/A	none	0.20077
c29475/f1p0/3538	3536	1	MDP0000261002	complete	576	5	-	lincRNA375_PMID_24635777	Copia-88_SB-LTR,Copia-88_SB-I	0.180724
c21552/f1p0/750	750	1	NP_001151832.1	complete	576	2	-	N/A	(TG)n	4.86798
c14215/f6p5/1409	1412	1	Seita.9G357000.1.p	complete	576	4	-;;Uncharacterised protein family Ycf36	CNT0008331	(GCCGCG)n	19.902
c41806/f1p1/2719	2721	N/A	Sobic.009G256100.1.p	complete	576	1	-	CNT0017884	none	0.559812
c2556/f1p0/1819	1842	1	Zm00008a017429_P01	5prime_partial	576	4	-;;Pentatricopeptide repeat	N/A	none	0.928523
c34018/f1p0/3415	3378	1	Zm00008a028888_P01	5prime_partial	576	3	-	N/A	none	0
c7207/f1p0/1600	1597	1	Pavir.Ca01228.1.p	complete	579	5	Transferase;;Chloramphenicol acetyltransferase-like domain	N/A	none	1.37714
c21240/f1p0/5768	5554	1	Pavir.Ea03052.4.p	complete	579	2	-	N/A	none	0
c25762/f1p0/3369	3376	N/A	Pavir.Eb00491.1.p	complete	579	5	Leucine-rich repeat;;Leucine-rich repeat domain, L domain-like	CNT0032650	none	0.0244383
c13620/f1p0/3453	3454	1	Prupe.6G123900.1.p	complete	579	2	-	lincRNA325_PMID_24635777	L1-7_ZM	0.0408015
c22393/f1p0/2215	2186	1	Sevir.2G022200.1.p	complete	579	4	-;;Protein of unknown function DUF1719	N/A	G-rich	1.86884
c24461/f3p3/1081	1081	1	Sobic.003G050000.1.p	complete	579	3	-;;Protein of unknown function DUF393	N/A	none	160.726
c36399/f1p0/1400	1390	1	Sobic.005G216100.1.p	complete	579	6	S-adenosyl-L-methionine-dependent methyltransferase;;O-methyltransferase, family 2;;O-methyltransferase COMT-type	N/A	none	2.0712
c30151/f1p0/3400	3414	N/A	Sobic.007G196400.1.p	complete	579	6	S1 domain;;Nucleic acid-binding, OB-fold	N/A	none	0
c29603/f1p0/1191	1191	N/A	Sobic.009G014200.1.p	5prime_partial	579	6	Phosphoinositide-binding clathrin adaptor, domain 2;;AP180 N-terminal homology (ANTH) domain	N/A	(CGA)n,(AGC)n	1.01424
c22110/f1p0/3655	3657	1	Cucsa.031240.1	complete	582	8	-;;Reverse transcriptase domain	CNT0018902	Gypsy-41_SB-I,(CCA)n	0.305866
c31976/f1p0/1901	1840	1	GRMZM2G100058_P01	complete	582	13	Pentatricopeptide repeat	N/A	(CGCCT)n	0.575573
c40905/f1p0/2856	2969	1	Pahal.G01532.3	complete	582	11	EGF-like calcium-binding domain;;EGF-like domain;;EGF-like calcium-binding, conserved site	CNT0029164	none	0.0496094
c21856/f1p0/2298	2235	1	Pavir.Fa02365.1.p	complete	582	2	Leucine-rich repeat domain, L domain-like	N/A	(A)n	0
c34572/f1p0/1795	1802	1	Seita.6G011800.1.p	complete	582	N/A	N/A	N/A	none	0
c32831/f1p0/846	846	1	Sevir.5G376000.1.p	5prime_partial	582	4	Ribosomal protein L7/L12, C-terminal/adaptor protein ClpS-like	N/A	none	58.3079
c23274/f1p0/1502	1502	N/A	Sobic.001G222700.1.p	5prime_partial	582	3	-;;Fatty acid hydroxylase	CNT0010248	none	2.91494
c20348/f1p0/3721	3697	1	Sobic.002G312600.1.p	complete	582	4	Leucine-rich repeat domain, L domain-like	CNT0025789	none	0.303353
c22382/f1p0/1219	1196	1	Sobic.004G332100.1.p	complete	582	10	Zinc finger, RING-type;;Zinc finger, RING/FYVE/PHD-type	N/A	(GGCGGA)n	1.73383
c29170/f1p0/2067	1951	1	Sobic.004G336000.1.p	5prime_partial	582	13	DnaJ domain;;DnaJ domain, conserved site	N/A	none	0.187352
c34732/f1p0/3202	2961	1	GRMZM2G418206_P01	complete	585	6	Pentacotripeptide-repeat region of PROPR;;Pentatricopeptide repeat	N/A	none	0.0246343
c27680/f1p0/1633	1613	1	GRMZM5G813886_P01	5prime_partial	585	2	-	N/A	(A)n	0.07673
c17191/f1p0/5530	5526	N/A	Pahal.J00540.1	complete	585	N/A	N/A	CNT0018383	none	0.0771577
c35142/f1p0/4197	4084	1	Seita.9G280000.1.p	complete	585	2	-;;Domain unknown function DUF295	N/A	none	0.68762
c6325/f1p0/620	619	1	Sobic.001G104600.1.p	5prime_partial	585	2	Peroxiredoxin-like FAM213/AAED1	CNT0022586	none	44.0704
c19234/f1p0/1192	1185	1	Sobic.001G234000.1.p	5prime_partial	585	6	Growth-regulating factor;;WRC domain	N/A	GA-rich,LINE1-13_SBi	2.16538
c14838/f1p0/1080	1080	1	Sobic.001G298400.3.p	complete	585	3	-	N/A	(GCG)n,(CCGCGG)n,(ACGCGC)n,(CGG)n	0.64415
c9339/f1p0/889	890	1	Sobic.004G326500.1.p	5prime_partial	585	3	-	CNT0022073	none	7.26133
c10630/f1p0/5777	5788	1	Sobic.010G201200.1.p	complete	585	N/A	N/A	N/A	(TTTTTG)n,(TTTTC)n,STOWAWAY1_SB,(GTCCGG)n	0.0313051
c28427/f1p0/2558	2558	N/A	AHYPO_021673-RA	complete	588	2	-	N/A	none	0
c8412/f1p0/2694	2698	N/A	GRMZM2G054678_P01	5prime_partial	588	N/A	N/A	N/A	(ACGAGG)n	0.716358
c14966/f1p0/5583	5595	1	LOC_Os11g29520.1	complete	588	4	-;;Leucine-rich repeat domain, L domain-like	N/A	Copia-40_ZM-I,RLG_scTat_2_1-I	0.0464124
c4553/f1p0/3303	3299	N/A	Pavir.J03061.1.p	complete	588	4	-;;Protein of unknown function DUF594	CNT0026998	(TATAAC)n	0.0976424
c25332/f1p1/2820	2819	1	Pavir.J06704.1.p	complete	588	4	-;;Leucine-rich repeat domain, L domain-like	TCONS_00063477	(CGGCCGC)n,hAT-3_SBi	2.73348
c16546/f1p0/2331	2291	1	Sevir.4G085300.3.p	5prime_partial	588	6	-;;Carbon-nitrogen hydrolase	N/A	EnSpm-N39_SBi,(GCCGGC)n	0.299357
c16087/f1p4/1194	1198	1	Sobic.006G182800.1.p	complete	588	6	-;;Heat shock transcription factor family	N/A	(TCTCC)n,(CGCGCGG)n	3.80684
c28688/f1p0/3295	3269	1	Sobic.006G193200.2.p	complete	588	6	-;;Receptor, ligand binding region;;Periplasmic binding protein-like I	CNT0019489	STOWAWAY11_SB	0.978925
c29919/f1p0/1406	1406	1	Sobic.006G193200.2.p	5prime_partial	588	5	-	N/A	none	0.248374
c32401/f1p0/1372	1378	1	Sobic.006G279400.2.p	complete	588	5	-;;NAC domain	CNT0028936	none	4.50446
c15647/f1p0/1644	1643	N/A	Sobic.010G006300.1.p	complete	588	11	Homeobox KN domain;;Homeobox domain-like;;POX domain;;Homeobox domain	N/A	(CGG)n	4.67204
c11365/f1p0/1426	1426	N/A	106946	complete	591	7	-;;ATP-grasp fold, subdomain 2;;Phosphoribosylglycinamide synthetase, ATP-grasp (A) domain	N/A	none	0.0141183
c37071/f1p0/3603	3603	N/A	173602	complete	591	4	Carboxypeptidase, regulatory domain	N/A	LINE1-7_ZM	0.0111755
c35061/f1p0/3359	3348	1	Pahal.D01586.1	complete	591	2	-	N/A	(GGAGAA)n,ZhAT7_ZM,hAT2_SB	0.492269
c20766/f1p0/2454	2454	N/A	Pp3c23_19140V3.7.p	complete	591	4	-;;Magnesium transporter NIPA	CNT0040259	none	0
c34993/f1p0/1245	1162	1	Seita.7G062700.1.p	complete	591	N/A	N/A	N/A	none	0.543437
c20840/f1p0/1410	1397	1	Seita.9G330800.1.p	5prime_partial	591	3	-	N/A	(AGATGG)n,GA-rich	1.07494
c29476/f1p0/1203	1165	1	Sobic.002G105800.1.p	complete	591	9	Zinc finger, RING-type;;Zinc finger, RING/FYVE/PHD-type;;Zinc finger, RING-type, conserved site	CNT0027496	none	4.52769
c31992/f1p0/993	994	1	Sobic.002G261000.1.p	complete	591	3	-	CNT0018424	none	22.4816
c15006/f1p0/1118	1118	1	Sobic.002G371600.3.p	complete	591	3	Gamma-tubulin complex component protein	N/A	hAT-9_SBi	0
c7182/f2p1/957	961	1	Sobic.003G157900.1.p	5prime_partial	591	3	-	N/A	none	11.8366
c38167/f1p0/1142	1143	1	Sobic.003G277300.1.p	complete	591	3	MRN complex-interacting protein	N/A	none	2.73015
c16926/f1p0/1435	1439	N/A	Sobic.005G165800.1.p	complete	591	3	-;;RHD3/Sey1	CNT0031565	none	1.655
c10974/f1p0/2598	2609	1	Sobic.006G048400.1.p	complete	591	6	-	N/A	(GGC)n,A-rich	2.39755
c13069/f1p1/1777	1778	1	Sobic.009G196800.1.p	complete	591	7	Cytochrome P450;;Cytochrome P450, E-class, group I	N/A	none	5.25866
c30772/f1p0/2219	2219	N/A	Sphfalx0161s0013.1.p	complete	591	5	FAD/NAD(P)-binding domain;;FAD dependent oxidoreductase	N/A	none	0
c22553/f1p0/1547	1359	1	Pahal.C04670.1	complete	594	1	-	N/A	none	0.14442
c7028/f1p1/3500	3520	1	PGSC0003DMP400025287	complete	594	4	-;;Reverse transcriptase zinc-binding domain	lincRNA632_PMID_24635777	LINE1-64_SBi	0.0900341
c40434/f1p1/3393	3407	1	PGSC0003DMP400025287	complete	594	4	-;;Reverse transcriptase zinc-binding domain	lincRNA632_PMID_24635777	LINE1-64_SBi	0.17295
c22833/f1p0/1713	1658	N/A	Sobic.001G436500.1.p	5prime_partial	594	1	-	N/A	(CGGCGC)n	1.35114
c20803/f1p1/2706	2705	N/A	Sobic.002G193500.1.p	complete	594	2	Malonyl-CoA decarboxylase	lincRNA133_PMID_24635777	(CGC)n,GA-rich,ZhATN4_ZM	1.16999
c25736/f1p0/1230	1229	N/A	Sobic.003G028800.1.p	complete	594	5	-;;Protein of unknown function DUF1677, plant	N/A	(GCCGGC)n,(GCC)n,(AGC)n,(CGG)n	0.714629
c16051/f1p0/2290	2298	N/A	Sobic.006G268700.1.p	complete	594	1	Domain of unknown function DUF4220	N/A	none	0.185582
c16939/f1p0/1307	1307	1	Sobic.008G028600.1.p	complete	594	7	WRKY domain	N/A	(CCGGCG)n,(CGG)n,(CCA)n	13.7346
c6689/f1p0/6400	6447	1	Sobic.010G241500.1.p	complete	594	4	-;;Leucine-rich repeat domain, L domain-like	CNT0028450	A-rich,(A)n	0.13589
c32652/f1p0/3948	3948	N/A	49109	complete	597	6	2-oxoglutarate dehydrogenase E1 component;;Thiamin diphosphate-binding fold;;Transketolase-like, pyrimidine-binding domain	N/A	none	0
c36537/f1p0/3490	3487	1	Cucsa.031240.1	complete	597	8	-;;Reverse transcriptase domain	CNT0021343	Gypsy-42_SB-I,Gypsy-42_SB-LTR	0
c32194/f1p0/2426	2429	N/A	LOC_Os11g08729.1	complete	597	N/A	N/A	N/A	ATHILA-3_SBi-I,ATHILA-7_SBi-LTR	0.408277
c40553/f1p0/2412	2420	N/A	Pahal.C01463.1	complete	597	4	Leucine-rich repeat domain, L domain-like	N/A	none	0.57403
c12572/f1p0/4371	4371	N/A	Sobic.001G539400.13.p	5prime_partial	597	2	-	N/A	GA-rich	0
c3681/f1p0/1712	1730	N/A	Sobic.003G353000.1.p	5prime_partial	597	1	-	CNT0018458	STOWAWAY25_SB,(CGG)n	1.54902
c23063/f1p0/2191	2164	N/A	Sobic.009G086600.4.p	5prime_partial	597	6	-;;Nucleic acid-binding, OB-fold;;Replication protein A, OB domain	N/A	none	0.489844
c14539/f2p2/1161	1162	1	Sobic.009G130700.1.p	5prime_partial	597	2	-	CNT0018398	(CGGCGC)n,(TCGTCG)n	14.3031
c12120/f1p0/1269	1267	N/A	Sobic.010G104600.2.p	complete	597	4	Caleosin-related;;EF-hand domain	N/A	none	4.50201
c3457/f1p0/5281	5281	N/A	orange1.1g001761m	complete	600	3	Guanine nucleotide exchange factor Ect2;;Dbl homology (DH) domain	N/A	none	0
c10345/f1p0/2684	2638	N/A	Pavir.Cb01115.1.p	complete	600	2	-	N/A	(GAT)n,(GACGAT)n	0
c12056/f1p2/3602	3602	1	Sobic.001G381900.3.p	complete	600	6	PRC-barrel domain;;PRC-barrel-like	CNT0017848	(CGCGC)n,MuDR-9_ZM,EnSpm-N39_SBi	0.0235365
c23348/f1p1/3620	3624	1	Sobic.001G381900.3.p	complete	600	6	-;;PRC-barrel domain;;PRC-barrel-like	CNT0017848	(CGCGC)n,(AGCAGG)n	0.0811618
c31959/f1p0/4133	4130	1	Sobic.002G161400.1.p	complete	600	6	P-loop containing nucleoside triphosphate hydrolase	N/A	LINE1-31_SBi,Copia-34_SB-LTR	0.380469
c17392/f1p0/3603	3590	1	Sobic.008G028700.1.p	complete	600	2	GYF domain	CNT0017422	(CAGTCCC)n	0.154531
c2788/f1p0/6894	6977	1	Zm00008a010049_P01	complete	600	9	Leucine-rich repeat domain, L domain-like;;Leucine-rich repeat;;Leucine-rich repeat, cysteine-containing subtype	CNT0026897	(T)n,STOWAWAY14_SB	0.73005
c41591/f1p2/17138	17035	N/A	Oropetium_20150105_06278A	5prime_partial	603	9	-;;Ribonuclease III domain	N/A	(A)n	0.0461595
c29298/f1p0/904	903	1	Sevir.5G376000.1.p	5prime_partial	603	2	-	N/A	(CGG)n	32.5473
c12216/f1p1/1205	1205	1	Sobic.001G532000.1.p	complete	603	5	-;;F-box domain;;Phloem protein 2-like	N/A	none	4.4611
c25834/f1p1/1339	1350	1	Sobic.003G085000.1.p	complete	603	3	-;;SUF system FeS cluster assembly, SufD;;SUF system FeS cluster assembly, SufBD	N/A	(CCTC)n	5.52346
c25023/f1p0/2166	2185	1	Sobic.003G241100.2.p	complete	603	2	PDZ domain;;Membrane-bound transcription factor site-2 protease	N/A	none	1.10558
c15240/f1p0/3214	2976	1	Sobic.009G033100.3.p	complete	603	6	-;;Protein kinase domain;;Protein kinase-like domain	CNT0019158	(GCCATT)n	0.301699
c12698/f1p0/2299	2307	1	Sobic.009G051500.1.p	complete	603	4	-	N/A	(GGC)n,(CATGAA)n	1.37019
c34938/f1p0/3336	3324	1	Zm00008a000394_P01	5prime_partial	603	3	-	CNT0037803	none	0.577692
c40464/f1p0/2304	2300	N/A	Aco004003.1	complete	606	2	-;;Vacuolar calcium ion transporter, fungi	N/A	(CTTG)n	0.0525199
c7678/f1p0/3913	3686	N/A	Brast10G179000.1.p	5prime_partial	606	2	Leucine-rich repeat domain, L domain-like	N/A	none	0.0126409
c35491/f1p0/2173	2181	1	GRMZM2G082522_P01	complete	606	9	-;;Protein kinase domain;;Serine-threonine/tyrosine-protein kinase catalytic domain;;Serine/threonine-protein kinase, active site;;Protein kinase-like domain	CNT0024717	none	0.040898
c10900/f1p0/1271	1270	N/A	GRMZM2G174240_P01	complete	606	3	-;;GLABROUS1 enhancer-binding protein family	N/A	(CACGC)n,(CGCTCG)n	2.68301
c14343/f1p0/3458	3459	1	LOC_Os11g11790.1	complete	606	4	NB-ARC;;P-loop containing nucleoside triphosphate hydrolase	N/A	none	0.116407
c11271/f1p1/4120	4120	1	PGSC0003DMP400025287	complete	606	N/A	N/A	lincRNA632_PMID_24635777	LINE1-64_SBi,LINE1-73_SBi	0.399663
c5955/f1p0/3694	3683	1	Seita.4G231200.1.p	complete	606	8	Serine/threonine-protein kinase, active site;;Protein kinase domain;;Protein kinase-like domain	lincRNA566_PMID_24635777	none	0.0583581
c8512/f1p0/2998	2947	1	Sobic.002G050600.1.p	complete	606	4	NB-ARC;;P-loop containing nucleoside triphosphate hydrolase	N/A	(CT)n,(CGG)n	1.29239
c4508/f1p0/2300	2300	N/A	Sobic.004G327000.1.p	complete	606	9	Protein kinase domain;;Protein kinase, ATP binding site;;Protein kinase-like domain	N/A	(TCCGTCG)n,RLG_scMaximus_4_1-I	0.455173
c17943/f1p0/1261	1261	1	Sobic.007G076900.1.p	complete	606	11	Peptidase M24;;Peptidase M24A, methionine aminopeptidase, subfamily 1;;Peptidase M24, methionine aminopeptidase	N/A	none	4.40651
c32128/f1p0/2493	2486	1	Sobic.009G140000.1.p	5prime_partial	606	4	Mlo-related protein	CNT0006232	none	0.44931
c19750/f1p1/1226	1226	1	Sobic.009G232500.1.p	complete	606	3	-	N/A	(GCTCG)n	0.374164
c16374/f1p0/1970	1921	1	Sobic.010G242400.1.p	complete	606	9	Protein kinase domain;;Protein kinase, ATP binding site;;Concanavalin A-like lectin/glucanase domain;;Serine-threonine/tyrosine-protein kinase catalytic domain;;Protein kinase-like domain	CNT0028475	none	4.42173
c8980/f1p0/2692	2701	N/A	Zm00008a006237_P01	complete	606	4	Nucleotide-binding alpha-beta plait domain;;RNA recognition motif domain	N/A	(TTCCTT)n,(GT)n	0.231067
c8405/f1p0/2648	2638	1	70903	5prime_partial	609	6	Aconitase/3-isopropylmalate dehydratase large subunit, alpha/beta/alpha domain;;Aconitase/3-isopropylmalate dehydratase large subunit, alpha/beta/alpha, subdomain 1/3	N/A	none	0.540403
c23456/f1p0/5346	5073	1	Pahal.E01390.1	complete	609	2	Leucine-rich repeat domain, L domain-like	N/A	(T)n	0.0503937
c18604/f1p0/1630	1617	N/A	Pavir.J19719.1.p	complete	609	2	-	N/A	(CTCCCC)n	0.0250939
c33722/f1p0/3835	3979	1	Sevir.7G040800.4.p	complete	609	4	-;;P-loop containing nucleoside triphosphate hydrolase;;NB-ARC	CNT0029144	none	0
c33434/f1p0/2294	2292	1	Sevir.8G231300.3.p	5prime_partial	609	6	-	CNT0027883	(TTTTA)n	0.147044
c23400/f1p0/2319	2315	1	Sobic.002G137100.1.p	complete	609	7	-;;Serine/threonine-protein kinase, active site;;Protein kinase-like domain;;Protein kinase domain	N/A	none	0.334528
c8258/f1p0/1731	1729	1	Sobic.006G215800.1.p	5prime_partial	609	3	Microtubule-associated protein, MAP65/Ase1/PRC1	N/A	(CTC)n,(CCTCCGT)n,(GCC)n,(ACC)n	3.37679
c4533/f1p0/10336	10122	1	Sobic.010G241500.1.p	complete	609	4	-;;Leucine-rich repeat domain, L domain-like	CNT0028450	(T)n,(GAGACA)n	0.0305251
c6420/f1p1/5254	5274	N/A	Thecc1EG018243t1	complete	609	5	-;;Ribonuclease H-like domain;;Integrase, catalytic core	CNT0018902	Gypsy-54_SB-I	0.268235
c27094/f1p0/2448	2450	N/A	XP_007711622.1	5prime_partial	609	2	Extracellular membrane protein, CFEM domain	N/A	none	0.0821741
c42427/f1p0/2669	2592	N/A	Zm00008a033536_P01	complete	609	3	-;;Reverse transcriptase zinc-binding domain	N/A	LINE1-27_SBi	0.0363853
c8933/f1p0/884	890	1	GRMZM2G101625_P01	5prime_partial	612	3	-;;Protein of unknown function DUF2870	N/A	(CCT)n,(CGCCGC)n	8.15622
c27125/f1p0/2568	2566	1	LOC_Os11g37000.1	complete	612	1	-	CNT0026912	none	0.36273
c32843/f1p0/1094	1072	N/A	Pavir.J01183.1.p	5prime_partial	612	2	-	N/A	none	0.488292
c18940/f1p0/3458	3459	1	Seita.1G232700.1.p	5prime_partial	612	5	Leucine-rich repeat domain, L domain-like;;Leucine-rich repeat-containing N-terminal, plant-type	CNT0030362	hAT5_SB	0.235421
c7160/f1p0/1349	1373	1	Sobic.002G091600.1.p	complete	612	4	-;;Methyltransferase Ppm1/Ppm2/Tcmp;;S-adenosyl-L-methionine-dependent methyltransferase	CNT0020139	none	1.69692
c38240/f1p0/2651	2565	N/A	Sobic.002G217300.3.p	complete	612	3	-	N/A	none	0.679705
c31206/f1p1/1271	1270	1	Sobic.003G304200.1.p	5prime_partial	612	2	-	N/A	none	8.46522
c35758/f1p0/1170	1167	1	Sobic.009G085600.1.p	complete	612	8	-;;GNAT domain;;Acyl-CoA N-acyltransferase	CNT0008949	none	2.95003
c14851/f1p0/1407	1408	1	Bradi1g40710.1.p	complete	615	1	-	CNT0025357	Helitron-N4_SBi	1.0971
c31716/f1p0/2263	2195	1	LOC_Os02g06215.1	complete	615	3	-;;Reverse transcriptase zinc-binding domain	N/A	(AATGAA)n	0.540556
c25721/f1p0/3343	3353	1	LOC_Os11g47180.1	complete	615	8	Protein kinase-like domain;;Protein kinase domain;;Serine/threonine-protein kinase, active site	CNT0026992	none	0.294565
c10897/f1p0/3904	3887	1	OAG07911.1	complete	615	2	-	N/A	(CCT)n,(GCTT)n,(A)n	0.134666
c33027/f1p0/857	858	1	Sobic.005G185300.1.p	complete	615	3	-	N/A	none	1.50174
c32774/f1p0/827	831	N/A	GRMZM2G097135_P01	5prime_partial	618	5	-	N/A	none	2.61586
c15573/f1p0/5615	5681	1	Pahal.I03339.7	complete	618	4	-;;CHASE domain	CNT0018834	(CT)n,EWAY1_TM_LTR,(TC)n,Helitron-N6_SBi	0.535572
c25361/f1p0/3765	3729	1	Pahal.J01808.1	complete	618	8	Leucine-rich repeat domain, L domain-like;;Leucine-rich repeat, typical subtype;;Leucine-rich repeat	CNT0026835	none	0.942978
c24384/f1p0/3873	3827	N/A	Pavir.J40410.2.p	5prime_partial	618	4	NAD kinase/diacylglycerol kinase-like domain;;Diacylglycerol kinase, catalytic domain	CNT0018685	G-rich,(CGCGGC)n,(C)n	0.35362
c34965/f1p0/3476	3474	N/A	Seita.5G064000.1.p	complete	618	N/A	N/A	CNT0026604	none	0.0463619
c17855/f1p0/1158	1156	N/A	Sobic.003G028800.1.p	complete	618	5	-;;Protein of unknown function DUF1677, plant	N/A	(GCC)n,(AGC)n,(CGG)n	1.17339
c11290/f1p0/939	938	N/A	Sobic.004G100000.1.p	5prime_partial	618	6	-;;Protein of unknown function DUF1677, plant	N/A	none	6.67511
c32981/f1p0/3393	3446	1	Sobic.009G033100.5.p	complete	618	10	-;;Serine-threonine/tyrosine-protein kinase catalytic domain;;Protein kinase-like domain;;Protein kinase, ATP binding site;;Serine/threonine-protein kinase, active site;;Protein kinase domain	CNT0024717	MUTRIM1	0.369775
c37163/f1p0/909	900	N/A	Sobic.010G026500.1.p	5prime_partial	618	1	-	N/A	(CGC)n	20.0879
c18970/f1p0/2299	2201	1	GRMZM2G035023_P01	5prime_partial	621	6	-;;Transferase;;Chloramphenicol acetyltransferase-like domain	N/A	(A)n	0.132947
c15949/f1p0/5429	5367	1	GRMZM2G108597_P01	complete	621	3	-;;Amino acid transporter, transmembrane domain	CNT0029294	STOWAWAY17_SB,(AT)n,RLG_scAngela_2_1-I,Copia22-ZM_LTR,Gypsy-138_SBi-LTR	0.351961
c23281/f1p0/2402	2398	1	LOC_Os02g43780.1	complete	621	4	Domain of unknown function DUF4371;;Zinc finger, TTF-type	NONATHG003136.1	(CCG)n,(GGCCTC)n,hAT-4_SBi	0.157396
c2108/f2p0/2296	2297	1	Pavir.J06563.1.p	complete	621	6	Lipoxygenase;;Lipoxygenase, C-terminal	CNT0025426	(AAGGCC)n	1.29718
c40090/f1p1/3471	3479	1	Pavir.J33745.1.p	complete	621	9	-;;Leucine-rich repeat;;Concanavalin A-like lectin/glucanase domain;;Protein kinase-like domain;;Leucine-rich repeat domain, L domain-like	CNT0030362	none	0.11412
c13955/f1p0/5820	5860	1	Sobic.003G439200.1.p	complete	621	5	-;;RNA polymerase, alpha subunit	CNT0032588	none	0.164563
c22729/f1p0/1642	1621	1	Sobic.005G200300.1.p	complete	621	5	Aminotransferase, class I/classII;;Pyridoxal phosphate-dependent transferase;;Pyridoxal phosphate-dependent transferase, major region, subdomain 2	N/A	(CATG)n,(GGC)n	4.21981
c40992/f1p0/3392	3522	N/A	Sobic.006G030300.1.p	complete	621	6	Leucine-rich repeat;;Leucine-rich repeat domain, L domain-like	CNT0029732	(AC)n	0.206331
c36819/f1p0/4066	4073	1	Sobic.009G052300.4.p	complete	621	3	Domain of unknown function DUF625	CNT0018011	none	0.611769
c14556/f1p0/1711	1720	1	Zm00008a013490_P01	complete	621	3	-	CNT0019600	none	0.701497
c21664/f1p0/2469	2469	N/A	Pahal.I02302.1	complete	624	4	Guanine nucleotide-binding protein, beta subunit;;WD40/YVTN repeat-like-containing domain	N/A	(ACG)n	0
c26318/f1p2/3488	3489	1	Pavir.Ha00402.1.p	complete	624	11	-;;Protein kinase, ATP binding site;;Protein kinase-like domain;;Protein kinase domain;;Serine-threonine/tyrosine-protein kinase catalytic domain;;Serine/threonine-protein kinase, active site;;Concanavalin A-like lectin/glucanase domain	CNT0008362	(ATGT)n	1.06733
c3504/f1p1/1441	1438	1	Sobic.001G018000.1.p	5prime_partial	624	8	FAD/NAD(P)-binding domain	N/A	(CCGCGT)n,(AG)n	0.19481
c24386/f1p1/2365	2362	N/A	Sobic.003G033200.1.p	complete	624	2	Leucine-rich repeat domain, L domain-like	N/A	STOWAWAY20_SB	1.31345
c6358/f1p0/7108	6817	1	Zm00008a018558_P01	complete	624	2	-;;ABC transporter A, ABCA	TCONS_00065783	(C)n,(T)n,(CGG)n,STOWAWAY14_SB,Gypsy-63_SB-I,(ATA)n	0.0497145
c6623/f1p0/1207	1207	N/A	Araha.11756s0379.1.p	complete	627	10	Phosphoribosyltransferase-like;;Phosphoribosyl pyrophosphate synthetase, conserved site;;Ribose-phosphate diphosphokinase;;Phosphoribosyltransferase domain	N/A	none	0.116759
c4655/f1p0/1123	1123	1	Bradi4g12730.2.p	5prime_partial	627	4	-;;Leucine-rich repeat domain, L domain-like	N/A	none	0
c2706/f1p4/1621	1623	1	GRMZM2G137816_P03	complete	627	4	Uncharacterised protein family Ycf36	CNT0008331	(GCCGCG)n	5.57713
c39295/f1p0/3416	3426	N/A	Pavir.Fa01962.1.p	complete	627	5	-;;Transposase, MuDR, plant	CNT0024611	MuDR1_TD	0.300122
c2987/f1p0/3329	3330	1	Sobic.002G153600.4.p	complete	627	2	-	CNT0024529	(CGG)n,(GA)n	0.746077
c39162/f1p0/2628	2546	1	Sobic.005G175600.1.p	complete	627	4	Gnk2-homologous domain	CNT0008615	(ATGT)n,(TGTATA)n	0.193574
c17054/f1p0/3872	3872	N/A	Tp57577_TGAC_v2_mRNA34068	complete	627	4	Oxysterol-binding protein	N/A	(GAC)n	0.0259977
c31076/f1p0/7739	7606	N/A	Cucsa.031240.1	complete	630	4	Ribonuclease H-like domain	CNT0019305	(T)n,Gypsy-82_SB-I,Gypsy-82_SB-LTR	0.142935
c11337/f1p0/6164	6161	1	GRMZM2G128434_P01	complete	630	7	P-loop containing nucleoside triphosphate hydrolase	N/A	LINE1-31_SBi,Copia-34_SB-LTR,(GGT)n	0.718833
c7822/f1p0/3521	3527	1	Pahal.A01115.1	complete	630	2	-	CNT0017457	hAT4_SB,hAT-4_SBi,Copia-66_SB-LTR	0.165536
c7463/f1p0/2261	2262	1	Pavir.J28716.1.p	complete	630	5	-;;Ribonuclease H-like domain	N/A	Gypsy-132_SBi-LTR,L1-2_SBi,LINE1-65_SBi,(CA)n	1.067
c3966/f1p0/1129	1129	1	Sobic.001G108000.1.p	complete	630	6	Maf-like protein;;Inosine triphosphate pyrophosphatase-like	N/A	none	4.35108
c32547/f1p0/2997	3002	1	Sobic.003G080000.1.p	complete	630	8	Protein kinase-like domain;;Protein kinase domain;;Protein kinase, ATP binding site;;Serine-threonine/tyrosine-protein kinase catalytic domain	CNT0031784	STOWAWAY14_SB	0.33232
c10612/f1p0/1183	1183	N/A	Sobic.003G271400.1.p	5prime_partial	630	7	-;;Chloride channel, voltage gated;;Chloride channel, core;;Aldolase-type TIM barrel	CNT0016084	none	0.966954
c20990/f1p0/2469	2455	N/A	Sobic.005G165800.1.p	complete	630	3	RHD3/Sey1	CNT0031565	none	0.243541
c2451/f1p0/3846	3836	1	Sobic.009G041400.2.p	complete	630	4	-;;Leucine-rich repeat domain, L domain-like	CNT0018383	none	0.33775
c17336/f1p0/5751	5541	N/A	Cucsa.031240.1	complete	633	2	-;;Retroviral aspartyl protease	CNT0019305	Gypsy-134_ZM-I,Gypsy-77_SB-I	0.0235493
c8167/f1p0/704	704	N/A	GRMZM2G419606_P01	5prime_partial	633	2	-	N/A	none	5.54792
c24697/f2p0/1182	1183	1	Pahal.H00183.1	5prime_partial	633	1	-	N/A	none	8.11773
c38413/f1p0/2767	2755	1	Pavir.Bb02212.1.p	5prime_partial	633	2	-	N/A	GA-rich,(CCG)n,(GAAAAA)n	0.447234
c20105/f1p0/1791	1852	1	Pavir.Fb01186.1.p	3prime_partial	633	4	-	CNT0025888	(TCCCTG)n	0.062511
c25167/f1p0/1222	1222	N/A	Pavir.J14681.1.p	5prime_partial	633	5	GOLD domain;;TMP21-related	TCONS_00012711	(CCT)n	0.263603
c9409/f1p0/2128	2089	N/A	Sobic.002G002300.4.p	complete	633	3	-;;Isoprenoid synthase domain	N/A	(CGG)n	1.85193
c18212/f1p0/1481	1483	1	Sobic.003G383200.1.p	3prime_partial	633	1	-	N/A	(GCC)n	0.322612
c19970/f1p0/3663	3661	1	Sobic.004G091500.1.p	complete	633	4	Leucine-rich repeat domain, L domain-like	lincRNA566_PMID_24635777	none	0.589061
c17520/f1p0/2422	2413	1	Sobic.004G279500.2.p	complete	633	3	-	CNT0030007	REP2_SB	0.41717
c37033/f1p1/4750	4743	1	Sobic.005G057700.1.p	complete	633	7	Leucine-rich repeat domain, L domain-like;;Leucine-rich repeat;;Leucine-rich repeat-containing N-terminal, plant-type	CNT0030538	none	0
c25779/f1p0/1472	1475	N/A	Sobic.008G087500.1.p	complete	633	3	-	N/A	(GGC)n,(GTC)n,(GCGCCG)n	1.31109
c34818/f1p0/2886	2872	1	Sobic.008G123900.2.p	complete	633	3	-	N/A	(T)n	0.333799
c34783/f1p0/3296	3560	1	GRMZM2G474777_P01	5prime_partial	636	3	-;;Leucine-rich repeat-containing N-terminal, plant-type	CNT0028450	none	0.204528
c30482/f1p1/1316	1315	N/A	Pahal.G02376.1	5prime_partial	636	4	Phospholipid/glycerol acyltransferase	N/A	(CTCCT)n,(GGC)n,(GCGTCC)n,(TGCC)n	5.7622
c9842/f1p0/5920	5904	1	Sobic.002G091700.1.p	complete	636	3	Mlo-related protein	CNT0013616	Gypsy-92_SB-LTR,HAZEAN1,HAZEAN2,(ACCAA)n,Gypsy-140_SBi-LTR	0.154805
c43996/f1p0/3505	3463	N/A	Sobic.002G217400.1.p	complete	636	2	-	CNT0020084	(CCGCG)n,(A)n	0.0507013
c29850/f1p1/1354	1355	1	Sobic.002G221600.1.p	5prime_partial	636	2	-	N/A	none	0.946901
c3947/f1p0/5093	5261	1	Sobic.004G073400.1.p	5prime_partial	636	6	ABC transporter type 1, transmembrane domain	CNT0036270	(CGCGG)n,DNA-5_SBi,RTE-1_SBi	0.128517
c37417/f1p0/3668	3685	1	Sobic.006G239900.1.p	complete	636	9	-;;Leucine-rich repeat;;Leucine-rich repeat domain, L domain-like	N/A	none	0.211964
c3059/f1p1/2757	2757	N/A	Sobic.007G083900.1.p	complete	636	9	-;;DNA-binding pseudobarrel domain;;B3 DNA binding domain	N/A	none	0.15032
c29774/f1p0/4698	4584	1	Zm00008a039421_P01	complete	636	N/A	N/A	CNT0019305	Gypsy-95_SB-I,Gypsy-144_ZM-I	0.0592503
c8425/f1p0/3371	3371	N/A	EME42407.1	complete	639	N/A	N/A	N/A	(ATGATC)n	0
c22497/f1p0/3447	3443	1	mrna28906.1-v1.0-hybrid	complete	639	7	-;;Reverse transcriptase domain	CNT0024662	Gypsy-40_SB-LTR,Gypsy-40_SB-I	0
c19457/f1p0/1713	1621	1	Pahal.A02841.2	complete	639	6	Protein kinase-like domain;;Protein kinase domain	N/A	none	0.0130776
c29296/f1p0/2771	2763	1	Pahal.F00255.1	complete	639	5	-;;Cytochrome P450	CNT0029111	(CCTC)n,(TCC)n	1.68723
c18114/f1p0/1608	1605	1	Pavir.Ca00672.1.p	complete	639	7	-;;Bulb-type lectin domain	CNT0028353	none	0.670075
c13676/f1p0/5536	5540	1	Pavir.Ib01401.1.p	complete	639	4	-;;Ribonuclease H-like domain	CNT0028320	(ATCC)n,(TCC)n,(TCGCGC)n,(CGA)n,(GGC)n,hAT-3_SBi,(CTG)n	0.201191
c19556/f1p0/4236	4060	1	Pavir.J12318.1.p	complete	639	3	-	CNT0020781	CRM_INT	0
c18070/f1p1/1231	1230	N/A	PGSC0003DMP400003558	5prime_partial	639	4	NTF2-like domain	N/A	none	0.73656
c15444/f1p0/2930	2873	N/A	Sobic.002G207900.1.p	complete	639	5	-	N/A	(A)n	0.0253321
c18976/f1p0/1616	1614	1	Sobic.002G377400.1.p	complete	639	3	Concanavalin A-like lectin/glucanase domain	N/A	none	0.43981
c27488/f1p0/2782	2749	1	Sobic.003G185100.2.p	complete	639	3	-;;Proton-dependent oligopeptide transporter family	N/A	(TCT)n,(CGTCCA)n	0.171155
c27866/f1p0/2450	2452	N/A	Sobic.006G116900.1.p	complete	639	5	-;;Catalase-like domain;;Catalase core domain	N/A	(AGCTGC)n	0.279164
c38709/f1p0/2476	2462	N/A	Sobic.010G223800.1.p	complete	639	3	Ulp1 protease family, C-terminal catalytic domain	N/A	none	0.628072
c31484/f1p0/2541	2541	N/A	OAG15569.1	complete	642	2	-	N/A	none	0.0871543
c26807/f1p0/1421	1421	1	Pavir.Ha00811.1.p	complete	642	5	Ribonuclease H-like domain;;Ribonuclease H domain	N/A	L1-2_SBi	1.07691
c13247/f1p0/2440	2440	N/A	Pp3s169_130V3.1.p	complete	642	7	Rossmann-like alpha/beta/alpha sandwich fold;;Aminoacyl-tRNA synthetase, class Ia, anticodon-binding;;Arginine-tRNA ligase	N/A	none	0.0165022
c3981/f1p0/3318	3293	N/A	Sobic.006G227900.1.p	complete	642	2	-	N/A	(CCTCAA)n	0.235328
c37731/f1p0/3541	3537	N/A	Sobic.007G176900.1.p	complete	642	5	D-galactoside/L-rhamnose binding SUEL lectin domain;;Glycoside hydrolase, family 35	CNT0018914	(CCGTCC)n,STOWAWAY13_SB	0.785498
c9112/f1p0/1145	1148	N/A	Sobic.010G006400.1.p	5prime_partial	642	8	-;;Zinc finger, RING-type;;Zinc finger, RING/FYVE/PHD-type	N/A	(CCT)n,(GCCGCT)n	0.243629
c12520/f1p0/2191	2235	1	Sobic.010G103300.3.p	complete	642	4	-;;Membrane attack complex component/perforin (MACPF) domain	CNT0017822	(GGC)n	0.818832
c31173/f1p0/2945	2803	1	LOC_Os02g40240.2	complete	645	8	Leucine-rich repeat;;Leucine-rich repeat domain, L domain-like	CNT0030362	(TGC)n	0.16448
c3836/f1p0/3761	3679	1	LOC_Os11g46970.1	complete	645	5	-;;Leucine-rich repeat domain, L domain-like;;Leucine-rich repeat	CNT0026835	(A)n	0.464962
c27753/f1p0/1077	1077	1	Sobic.007G161500.1.p	5prime_partial	645	2	-	CNT0035178	(TA)n,(GCTT)n	20.3191
c35450/f1p0/1217	1217	1	GRMZM2G030436_P01	5prime_partial	648	5	-;;Transferase;;Chloramphenicol acetyltransferase-like domain	N/A	none	0.2316
c12756/f2p0/3763	3763	1	GRMZM2G171871_P01	5prime_partial	648	4	-;;Plastid lipid-associated protein/fibrillin conserved domain	N/A	(GCGCCA)n,LINE1-63_SBi	1.33014
c32956/f1p0/4595	4596	1	GRMZM2G474777_P01	complete	648	6	Leucine-rich repeat domain, L domain-like;;Leucine-rich repeat-containing N-terminal, plant-type;;Leucine-rich repeat	CNT0028450	none	0.162436
c39815/f1p0/2703	2704	1	Pavir.Ha00922.1.p	complete	648	6	Zinc finger, SWIM-type;;Zinc finger, PMZ-type	CNT0024611	MuDR1_TD,MuDR-8_SBi	0.656859
c32810/f1p0/3803	3950	1	Sobic.003G267300.1.p	complete	648	4	-;;ABC transporter type 1, transmembrane domain	CNT0019802	(TTTATT)n	0.0380617
c35486/f1p0/1272	1276	1	Sobic.008G030200.2.p	5prime_partial	648	8	Zinc finger, RING-type;;Zinc finger, RING/FYVE/PHD-type	CNT0019739	(GCCGCC)n,(GCACCT)n,DNA-5_SBi	6.18495
c36933/f1p0/3944	3944	1	ChrSy.fgenesh.mRNA.7	5prime_partial	651	5	-;;Reverse transcriptase, RNA-dependent DNA polymerase	lincRNA372_PMID_24635777	Copia-49_ZM-I,L1-1_SBi	0.107197
c31200/f1p0/2279	2243	1	LOC_Os02g06210.1	complete	651	3	Reverse transcriptase zinc-binding domain	N/A	(AATGAA)n	1.10537
c17766/f1p1/2882	2870	1	Pavir.J06164.1.p	complete	651	2	-	N/A	(CCG)n,(CCGC)n,(CCTGCCG)n	6.93343
c13991/f2p1/1687	1690	1	Pavir.J35267.1.p	5prime_partial	651	8	-;;P-loop containing nucleoside triphosphate hydrolase	N/A	none	12.7467
c7659/f1p0/3602	3577	1	Sobic.003G059300.1.p	complete	651	4	Leucine-rich repeat domain, L domain-like	CNT0032650	none	0.109803
c44351/f1p1/2287	2287	1	Sobic.004G035100.1.p	5prime_partial	651	5	NAD(P)-binding domain	N/A	none	3.00589
c12047/f1p0/5580	5526	1	Sobic.006G069100.3.p	complete	651	14	-;;Pentatricopeptide repeat;;Tetratricopeptide-like helical domain	CNT0020081	(GCCACCG)n,Helitron-3_ZM,STOWAWAY1_SB	0.276888
c42892/f1p0/2305	2307	1	Sobic.007G149700.4.p	complete	651	9	Protein kinase domain;;Serine/threonine-protein kinase, active site;;S-locus receptor kinase, C-terminal;;Protein kinase-like domain	CNT0032252	none	2.26128
c26951/f1p0/1559	1556	1	Sobic.007G149700.6.p	complete	651	9	Protein kinase domain;;Serine/threonine-protein kinase, active site;;Protein kinase-like domain;;S-locus receptor kinase, C-terminal	CNT0032252	none	0.373824
c37551/f1p1/4112	4084	1	Zm00008a037167_P01	complete	651	13	Pentatricopeptide repeat	N/A	(G)n	0.246328
c24911/f1p0/2259	2263	1	Pavir.Bb03009.1.p	complete	654	4	Ribonuclease H-like domain;;hAT-like transposase, RNase-H fold	lincRNA450_PMID_24635777	hAT-15_SBi	0.728932
c17809/f1p0/2556	2554	N/A	Pavir.Eb00417.1.p	complete	654	4	-;;Domain of unknown function DUF4283	N/A	LINE1-34_SBi,LINE1-46_SBi	1.35673
c4897/f1p0/6728	6719	N/A	Pavir.Eb00417.1.p	complete	654	4	-;;Domain of unknown function DUF4283	N/A	LINE1-46_SBi	0
c9499/f1p1/3437	3435	1	Seita.8G237800.1.p	complete	654	4	Leucine-rich repeat domain, L domain-like	CNT0030467	none	0.398753
c27581/f1p0/1576	1579	1	Sobic.001G096800.1.p	complete	654	3	-;;Uncharacterised protein family UPF0114	N/A	(TC)n	1.3088
c37903/f1p0/2988	2941	1	Sobic.003G185100.1.p	complete	654	5	Proton-dependent oligopeptide transporter family	CNT0028879	(ACCTGC)n,(TCT)n	0.14283
c17397/f2p5/1387	1389	1	Sobic.003G403800.5.p	5prime_partial	654	5	Alpha/beta hydrolase fold-1;;Alpha/Beta hydrolase fold	CNT0023676	none	2.37785
c11775/f1p0/5611	5715	1	Sobic.004G073400.1.p	complete	654	2	-	CNT0036270	(CGCGG)n,DNA-5_SBi,RTE-1_SBi	0.090908
c12573/f1p0/4019	3956	1	Sobic.008G031300.1.p	complete	654	5	-	N/A	(GCCCGA)n,hAT-2_SBi	0.676856
c14941/f1p9/866	866	1	Sobic.009G130700.1.p	5prime_partial	654	3	TPM domain	CNT0018398	(GCCGGC)n,(TCGTCG)n	149.871
c39212/f1p0/2134	2130	1	Thecc1EG021019t2	complete	654	7	-;;Aspartyl/glutamyl-tRNA amidotransferase subunit B-related;;Asn/Gln amidotransferase;;Aspartyl/glutamyl-tRNA(Asn/Gln) amidotransferase, subunit B /E;;Aspartyl/Glutamyl-tRNA(Gln) amidotransferase, subunit B/E, catalytic	N/A	none	7.66553
c12359/f1p0/5428	5425	1	Cucsa.031240.1	complete	657	6	-;;Ribonuclease H-like domain;;Integrase, catalytic core	CNT0021343	Gypsy-102_SB-I	0.0249434
c7585/f1p0/2669	2652	1	GRMZM2G158252_P01	complete	657	12	Signal transduction histidine kinase, dimerisation/phosphoacceptor domain;;Histidine kinase-like ATPase, C-terminal domain;;Histidine kinase domain	CNT0005318	none	0.57482
c10853/f2p0/1356	1357	1	GRMZM2G164318_P01	complete	657	3	Fatty acid hydroxylase	N/A	(CCGCGG)n,(CCGGTG)n	1.05006
c34695/f1p0/5059	4826	N/A	GRMZM2G439799_P01	complete	657	11	Leucine-rich repeat;;Leucine-rich repeat domain, L domain-like	CNT0020473	none	0.0269194
c40099/f1p0/2283	2282	1	Pavir.Cb00476.1.p	complete	657	3	-	CNT0025450	none	3.2037
c5867/f1p0/2425	2436	1	Sevir.9G019700.1.p	5prime_partial	657	5	-;;Coenzyme Q-binding protein COQ10, START domain	N/A	(GAGCCC)n,(GCC)n	0.397545
c12504/f1p0/1112	1114	1	Sobic.002G257600.1.p	5prime_partial	657	12	Pentatricopeptide repeat	N/A	none	0.234941
c41999/f1p1/2296	2295	1	Sobic.005G175500.1.p	complete	657	6	Gnk2-homologous domain	CNT0026480	DNA-8-3_SBi,EnSpm-N20_SBi,EnSpm1_SB,EnSpm-22_SBi,ENSPM-N1_ZM	1.1772
c27959/f1p0/825	825	1	Sobic.007G151900.2.p	5prime_partial	657	5	Heat shock protein DnaJ, cysteine-rich domain	N/A	none	28.3605
c9726/f2p2/1087	1088	1	Sobic.008G066100.1.p	5prime_partial	657	5	NAD(P)-binding domain;;NAD-dependent epimerase/dehydratase	CNT0002028	none	122.524
c29453/f1p1/1185	1184	1	Sobic.008G102000.1.p	5prime_partial	657	4	-	TCONS_00028409	Gypsy-12_SB-LTR	3.20266
c15540/f1p0/2245	2246	N/A	GRMZM2G054946_P01	complete	660	N/A	N/A	N/A	none	0.0680737
c17072/f1p0/1109	1110	1	GRMZM2G069922_P03	5prime_partial	660	15	-;;EF-Hand 1, calcium-binding site;;EF-hand domain pair;;EF-hand domain	CNT0023148	none	0.598603
c35328/f1p1/3574	3592	N/A	Sobic.004G107500.1.p	complete	660	5	KHA domain	CNT0030199	A-rich	0.213544
c44234/f1p0/2575	2573	1	Sobic.004G336000.1.p	5prime_partial	660	14	DnaJ domain;;DnaJ domain, conserved site	N/A	none	0.714471
c12479/f1p0/3570	3571	N/A	XP_003839700.1	complete	660	10	-;;Zinc finger, FYVE/PHD-type;;Zinc finger, PHD-finger;;Zinc finger, PHD-type;;Zinc finger, PHD-type, conserved site;;Zinc finger, RING/FYVE/PHD-type	N/A	(CGTC)n,(AAGAGG)n	0
c17941/f1p0/1064	1063	1	Zm00008a007595_P01	5prime_partial	660	3	-;;Recq-mediated genome instability protein 1, C-terminal OB-fold domain	N/A	none	0.550587
c10046/f1p0/2442	2446	1	Pahal.A02555.2	complete	663	3	Protein phosphatase 2A regulatory subunit PR55	N/A	(A)n,(CGA)n	1.42153
c14529/f1p0/5173	5431	1	Sobic.002G016200.1.p	complete	663	5	-;;Protein kinase-like domain;;Protein kinase, ATP binding site	CNT0022477	(CCT)n	0.0806322
c36086/f1p0/1294	1296	1	Sobic.004G008100.1.p	5prime_partial	663	3	-	N/A	none	0.124362
c24525/f2p0/1483	1479	N/A	Sobic.004G123000.1.p	complete	663	1	-	N/A	none	4.38317
c23338/f1p0/1334	1335	1	Sobic.006G195800.1.p	3prime_partial	663	5	-;;P-loop containing nucleoside triphosphate hydrolase	CNT0029359	(CTCTCC)n	2.13813
c15463/f1p2/778	778	1	Sobic.007G113600.2.p	5prime_partial	663	2	-;;Domain of unknown function DUF1995	CNT0012923	none	7.20953
c34861/f1p0/1263	1263	1	Zm00008a005930_P01	5prime_partial	663	9	-;;Sugar transporter, conserved site;;Major facilitator superfamily domain;;Major facilitator, sugar transporter-like	N/A	(GCGTCG)n,(CGTCTC)n	0.102591
c4749/f1p0/3297	3352	N/A	KXJ84925.1	complete	666	1	-	N/A	none	0.486499
c12456/f1p0/5318	5330	N/A	mrna28906.1-v1.0-hybrid	complete	666	3	-	CNT0018902	Gypsy-44_SB-I,Gypsy-11_SB-I	0.449071
c42051/f1p0/3472	3509	N/A	Seita.5G158400.1.p	complete	666	3	-	N/A	(A)n	0.368655
c4689/f1p0/3469	3473	1	Sobic.002G091700.1.p	complete	666	3	Mlo-related protein	CNT0013616	Helitron-3_ZM,Gypsy-140_SBi-LTR	0.202469
c29484/f1p0/2417	2385	N/A	Sobic.004G107500.1.p	complete	666	5	-;;Ion transport domain	CNT0030199	none	0.190613
c39516/f1p0/4035	4012	1	Sobic.006G085900.1.p	complete	666	12	Pentatricopeptide repeat	N/A	(CCG)n,(CCTCCA)n,LINE1-47_SBi,LINE1-8_SBi	0.170404
c19453/f1p0/687	688	1	Sobic.010G244600.1.p	5prime_partial	666	8	-;;NIF system FeS cluster assembly, NifU, C-terminal	N/A	none	23.8782
c29256/f1p1/2440	2444	1	Zm00008a003163_P01	complete	666	3	Wall-associated receptor kinase, galacturonan-binding domain	CNT0029164	none	0.860278
c29717/f1p0/2334	2332	N/A	Cucsa.031240.1	complete	669	6	Integrase, catalytic core;;Ribonuclease H-like domain	CNT0019305	Gypsy-113_SB-I	0.535259
c19735/f1p0/1681	1682	N/A	Pahal.I04120.1	5prime_partial	669	3	Pectinacetylesterase/NOTUM	CNT0014034	none	0.111365
c26190/f1p1/3292	3296	1	Seita.3G102700.1.p	complete	669	15	Protein kinase domain;;Protein kinase-like domain;;Serine/threonine-protein kinase, active site;;Concanavalin A-like lectin/glucanase domain;;Serine-threonine/tyrosine-protein kinase catalytic domain;;Protein kinase, ATP binding site	CNT0024620	(CCGCCT)n	0.939798
c15993/f1p0/3408	3435	1	Sevir.1G054700.1.p	complete	669	8	-;;ABC transporter type 1, transmembrane domain	CNT0036270	(CGGCG)n,DNA-5_SBi,RTE-1_SBi	0.552972
c26018/f1p0/1436	1440	1	Sobic.002G388100.2.p	complete	669	17	-;;P-loop containing nucleoside triphosphate hydrolase;;Small GTPase superfamily;;Small GTP-binding protein domain	CNT0030918	(CACCGC)n,(TCT)n	1.01027
c25038/f1p0/1346	1353	1	Sobic.002G388100.2.p	complete	669	17	-;;P-loop containing nucleoside triphosphate hydrolase;;Small GTPase superfamily;;Small GTP-binding protein domain	CNT0030918	(CTCCAC)n	4.10301
c38599/f1p1/1055	1058	1	Sobic.003G287500.1.p	complete	669	7	UDP-glucuronosyl/UDP-glucosyltransferase	N/A	(GAGATG)n	2.53269
c28941/f1p0/4871	4779	1	Sobic.004G073400.1.p	complete	669	8	-;;ABC transporter type 1, transmembrane domain	CNT0036270	(CGGCG)n	0.196728
c21437/f1p0/4821	4656	1	Sobic.004G073400.1.p	complete	669	9	-;;ABC transporter type 1, transmembrane domain	CNT0036270	(CGGCG)n,(A)n	0.0138555
c40182/f2p0/2682	2653	1	Sobic.004G214900.1.p	complete	669	12	-;;Leucine-rich repeat domain, L domain-like;;Leucine-rich repeat;;Leucine-rich repeat, typical subtype	CNT0030362	none	0.277383
c30256/f1p2/2481	2481	N/A	Sobic.006G034300.1.p	complete	669	9	Thiamin diphosphate-binding fold;;Transketolase family;;Transketolase C-terminal/Pyruvate-ferredoxin oxidoreductase domain II;;Transketolase-like, pyrimidine-binding domain;;Transketolase, C-terminal domain	CNT0003910	none	0.158721
c26039/f1p0/1481	1471	1	Sobic.010G052500.1.p	5prime_partial	669	3	-	N/A	none	1.47535
c15747/f1p0/2822	2681	N/A	Sobic.010G124700.1.p	complete	669	6	-;;Protein kinase-like domain;;Protein kinase domain	CNT0027209	(ACTCAT)n	0
c34561/f1p0/2541	2541	N/A	Kaladp0055s0543.1.p	5prime_partial	672	1	-	N/A	none	0
c15860/f1p0/3780	3797	1	LOC_Os05g25350.1	complete	672	2	-	CNT0009056	Copia-12_SB-I,(CTA)n	0.360553
c40591/f1p0/3612	3663	1	Pavir.Ha00402.1.p	5prime_partial	672	1	-	CNT0008362	(ATGT)n,(GGCGCGC)n	0.397722
c6016/f1p0/2199	2223	1	Sobic.003G096900.1.p	complete	672	9	Protein kinase-like domain;;Protein kinase domain;;Serine/threonine-protein kinase, active site	CNT0018528	none	0.375963
c10044/f1p2/2250	2247	N/A	Sobic.004G019500.1.p	complete	672	11	-;;Pentatricopeptide repeat	N/A	none	0.137026
c18000/f1p0/3890	3875	1	Sobic.010G232700.4.p	complete	672	12	Pentatricopeptide repeat	N/A	(A)n,G-rich,LINE1-54_SBi	0.316928
c12748/f1p0/1290	1289	1	Sobic.010G262300.1.p	complete	672	4	-;;Coiled-coil domain-containing protein 90-like	CNT0028982	(CGCCTC)n,(GCC)n	0.497043
c10221/f1p0/1458	1457	1	Sobic.010G262300.1.p	complete	672	4	-;;Coiled-coil domain-containing protein 90-like	CNT0028982	(CGCCTC)n,(GCC)n,(TGTAT)n	1.48921
c34734/f1p0/1796	1796	N/A	KFM78680.1	complete	675	10	Immunoglobulin subtype;;Immunoglobulin-like domain;;Immunoglobulin subtype 2;;Immunoglobulin-like fold	N/A	(ATC)n,A-rich,(TCG)n,(CAA)n,(CAG)n	0
c34281/f1p0/3212	3225	N/A	Migut.H01068.1.p	complete	675	4	Major facilitator, sugar transporter-like;;Major facilitator superfamily domain	N/A	(TTGAA)n,(AAATGG)n,(AGA)n	0.0811549
c27095/f1p1/2110	2116	1	Pavir.J34126.1.p	complete	675	N/A	N/A	N/A	none	2.07495
c44035/f1p0/2306	2308	N/A	Sobic.001G427400.1.p	complete	675	5	-;;P-loop containing nucleoside triphosphate hydrolase	N/A	GA-rich	0.279135
c37900/f1p0/3909	3937	1	Sobic.003G059300.1.p	complete	675	6	Leucine-rich repeat domain, L domain-like;;Leucine-rich repeat	CNT0032650	none	0.254217
c4864/f1p0/4178	4070	1	Sobic.004G073400.1.p	complete	675	6	-;;ABC transporter type 1, transmembrane domain	CNT0036270	(CGGCG)n	0.177157
c10106/f1p2/2910	2905	1	Pavir.Ga02301.1.p	complete	678	2	Wall-associated receptor kinase, galacturonan-binding domain	N/A	Gypsy-N129_SBi-LTR,Gypsy-125N_SBi-LTR	0.99451
c28213/f1p1/3893	3893	N/A	Pavir.J26789.1.p	complete	678	5	-;;Leucine-rich repeat domain, L domain-like;;Leucine-rich repeat	CNT0011711	none	0.366953
c9262/f1p0/1230	1225	1	Sobic.002G381100.2.p	complete	678	3	-	N/A	none	0.378001
c7348/f1p1/2117	2121	1	Sobic.004G035100.1.p	complete	678	5	NAD(P)-binding domain	N/A	none	4.87317
c8415/f1p0/1759	1772	1	Sobic.004G059800.1.p	complete	678	2	-	N/A	none	0.142038
c14713/f1p0/805	805	1	Sobic.010G244600.1.p	5prime_partial	678	8	NIF system FeS cluster assembly, NifU, C-terminal	N/A	none	33.913
c4571/f1p0/1187	1187	1	Sobic.010G257300.8.p	complete	678	5	Alpha/beta hydrolase fold-3;;Alpha/Beta hydrolase fold	CNT0009227	none	2.06434
c5315/f1p0/2366	2340	N/A	Cucsa.031240.1	complete	681	3	-	CNT0019305	Gypsy-134_ZM-I	0.505841
c31251/f1p0/1389	1359	1	GRMZM2G051952_P02	complete	681	5	-;;Protein of unknown function DUF3493	CNT0038316	(GCAG)n,(CGA)n,(C)n,(A)n	0.636102
c30936/f1p0/3494	3497	1	Pavir.Ha00098.1.p	complete	681	6	-;;Concanavalin A-like lectin/glucanase domain;;Legume lectin domain;;Legume lectin, beta chain, Mn/Ca-binding site	CNT0017344	DNA-1_SBi,HARB-N11_SBi,(AGCCCG)n,DNA-12N_SBi,REP2_SB	0.952972
c7110/f1p1/1171	1156	1	Sobic.001G325400.1.p	complete	681	5	-;;UDP-glucuronosyl/UDP-glucosyltransferase	TCONS_00056386	(T)n,EnSpm-34_SBi	0.892263
c31053/f1p0/4145	4145	N/A	Sobic.002G057400.2.p	complete	681	4	HAUS augmin-like complex subunit 3, N-terminal;;HAUS augmin-like complex subunit 3	CNT0019512	Gypsy33-ZM_I-int,LINE1-4_SBi,STOWAWAY12_SB	0.125072
c35779/f1p0/3714	3718	N/A	Sobic.003G160400.1.p	complete	681	2	-	N/A	(C)n,LINE1-21_ZM,GA-rich	0.167862
c30845/f1p0/724	727	1	Sobic.003G360800.1.p	5prime_partial	681	8	-;;Tetratricopeptide-like helical domain;;Tetratricopeptide repeat-containing domain	N/A	none	0
c17361/f1p0/1061	1066	1	Sobic.004G221000.1.p	5prime_partial	681	8	-;;Cyclic nucleotide-binding-like;;RmlC-like jelly roll fold;;Cyclic nucleotide-binding domain	N/A	(CTT)n	0.414584
c31316/f1p0/4779	4735	N/A	Sobic.006G050700.1.p	complete	681	7	P-loop containing nucleoside triphosphate hydrolase;;NB-ARC	CNT0026973	(CCGGCT)n	0.0630353
c27800/f1p0/1345	1344	N/A	31167.m000025	complete	684	4	Kynurenine formamidase	N/A	none	0.269634
c21537/f1p0/3395	3392	1	GRMZM5G871154_P01	complete	684	8	Phospholipase D/Transphosphatidylase;;Phospholipase D-like domain	CNT0018445	(C)n	5.1578
c20609/f1p0/2853	2748	1	GRMZM5G873519_P01	5prime_partial	684	2	-	N/A	(GGCCGAC)n,(CGGCCCA)n	0.0952418
c11605/f1p0/2365	2363	1	LOC_Os06g41980.1	complete	684	6	-;;Serine-threonine/tyrosine-protein kinase catalytic domain;;Protein kinase-like domain	CNT0025248	(CCAGCT)n,(CGG)n,RLG_scTat_2_1-I	0.521954
c23428/f1p0/2499	2499	N/A	Mapoly0015s0047.1.p	complete	684	9	Protein kinase domain;;Serine/threonine-protein kinase, active site;;Protein kinase-like domain	N/A	(CTGC)n,(CTT)n	0.0241688
c15462/f1p2/1306	1316	1	Pahal.C04670.1	complete	684	5	BURP domain	N/A	none	1.3886
c26432/f1p0/3965	3748	1	Pahal.D02155.1	complete	684	4	NB-ARC	N/A	none	0.0866102
c2926/f1p0/6051	5934	1	Pavir.J12318.1.p	complete	684	2	-;;Leucine-rich repeat domain, L domain-like	CNT0020781	LINE1-50_SBi,CRM_INT	0.305952
c16239/f1p0/8380	8332	1	Sevir.1G237900.1.p	complete	684	11	Protein kinase domain;;Serine/threonine-protein kinase, active site;;Protein kinase-like domain;;Concanavalin A-like lectin/glucanase domain;;Protein kinase, ATP binding site	CNT0030537	(T)n,(AGC)n,(TGC)n	0.0549475
c20531/f1p2/1114	1114	1	Sevir.3G396700.1.p	complete	684	5	BURP domain	N/A	none	11.5175
c6703/f1p0/1308	1308	1	Sobic.003G420400.1.p	5prime_partial	684	4	-;;Phosphatidylinositol N-acetylglucosaminyltransferase subunit Y	CNT0019989	(CCG)n	3.18613
c29572/f1p0/10042	10016	1	Sobic.007G225900.1.p	complete	684	3	-;;Plant organelle RNA recognition domain	N/A	ATHILA-2_SBi-LTR,G-rich	0
c2633/f1p0/868	832	1	Sobic.010G091000.2.p	5prime_partial	684	2	-	N/A	Gypsy-11_SB-I	0
c1725/f3p0/5428	5434	1	Zm00008a028671_P01	complete	684	6	-;;Reverse transcriptase domain	N/A	TSB1,LINE1-16_SBi,LINE1-4_SBi	0.369669
c31455/f1p0/1766	1767	1	Pavir.J36502.1.p	complete	687	7	Leucine-rich repeat domain, L domain-like;;Leucine-rich repeat	CNT0032650	Copia-134_SB-LTR	0.273448
c28019/f1p0/1825	1833	N/A	Sevir.4G297900.1.p	complete	687	3	-;;Exocyst complex component Exo70	N/A	(CACCAC)n	3.94306
c15652/f1p1/1438	1438	N/A	Sobic.002G343901.1.p	complete	687	1	-	N/A	none	1.99982
c30630/f1p0/1289	1355	1	Sobic.004G083500.1.p	5prime_partial	687	4	-;;Winged helix-turn-helix DNA-binding domain	CNT0014450	none	0.360806
c31599/f1p0/2534	2551	1	Sobic.006G243700.1.p	5prime_partial	687	4	Wall-associated receptor kinase, galacturonan-binding domain	CNT0020240	none	0.0333274
c28682/f1p0/1383	1379	N/A	Sobic.010G203500.1.p	5prime_partial	687	15	-;;Cytochrome P450;;Cytochrome P450, conserved site;;Cytochrome P450, E-class, group I	CNT0030993	none	3.0754
c31051/f1p0/4262	4167	1	Bradi4g03660.2.p	complete	690	6	-;;Leucine-rich repeat;;Leucine-rich repeat domain, L domain-like;;Leucine-rich repeat-containing N-terminal, plant-type	CNT0020946	(ATCTCC)n,(CGC)n	0.16145
c21940/f1p0/1632	1632	N/A	Oropetium_20150105_10677A	complete	690	7	-;;AAA+ ATPase domain;;P-loop containing nucleoside triphosphate hydrolase;;ABC transporter-like	CNT0002116	none	0.571742
c26935/f1p1/1572	1574	1	Pahal.C03150.1	complete	690	4	-;;Vacuolar protein sorting-associated protein 62	N/A	none	1.18274
c32441/f1p3/1969	1970	1	Pavir.Ha00402.1.p	complete	690	11	Serine-threonine/tyrosine-protein kinase catalytic domain;;Protein kinase, ATP binding site;;Protein kinase-like domain;;Protein kinase domain;;Serine/threonine-protein kinase, active site	CNT0008362	none	5.09997
c5258/f1p0/2101	2100	N/A	Seita.7G303200.1.p	complete	690	2	-	CNT0037028	(CGCCTC)n,Gypsy-108_SB-I,(AATAGT)n	0
c23135/f1p0/2965	2969	1	Sevir.1G044900.1.p	5prime_partial	690	6	-;;O-methyltransferase COMT-type;;Winged helix-turn-helix DNA-binding domain;;Plant methyltransferase dimerisation	CNT0014450	Copia15-ZM_LTR	3.73438
c6499/f1p0/3561	3574	1	Sevir.1G237900.1.p	complete	690	8	-;;Protein kinase domain;;Protein kinase-like domain;;Serine/threonine-protein kinase, active site	CNT0030362	none	0.360681
c18869/f1p0/1361	1361	1	Sevir.7G282400.2.p	3prime_partial	690	3	-	CNT0026867	(CGAAGA)n,(GAG)n,GA-rich	0.783919
c26646/f1p0/1183	1204	1	Sobic.001G313000.1.p	5prime_partial	690	3	-	N/A	G-rich	0.780168
c12653/f1p0/3503	3490	N/A	Sobic.001G482200.1.p	complete	690	7	FHY3/FAR1 family;;Zinc finger, GATA-type;;FAR1 DNA binding domain;;Zinc finger, NHR/GATA-type	N/A	MuDR-7_ZM,MuDR-10_SBi,MUTRIM1	0.163596
c32196/f1p0/1654	1655	1	Sobic.002G271200.1.p	complete	690	7	UDP-glucose 4-epimerase;;NAD(P)-binding domain;;NAD-dependent epimerase/dehydratase	N/A	(CGG)n	6.75086
c6814/f1p1/2254	2266	1	Sobic.010G096300.1.p	5prime_partial	690	7	SANT/Myb domain;;Myb domain;;Myb domain, plants;;Homeobox domain-like	CNT0028970	(CCG)n,RLG_scTat_2_1-I,ATHILA-7_SBi-LTR	2.20283
c31668/f1p4/1322	1329	1	GRMZM2G070723_P03	complete	693	8	Peptide chain release factor class I/class II;;Peptide chain release factor;;Double-stranded RNA-binding domain	N/A	none	8.34779
c38909/f1p0/2354	2363	1	GRMZM2G332452_P01	complete	693	4	Probable transposase, Ptta/En/Spm, plant	CNT0029790	EnSpm-41_SBi	0.30117
c5960/f1p0/5089	5010	N/A	KPM02263.1	complete	693	1	Vitellinogen, open beta-sheet, subdomain 2	N/A	none	0.168777
c19009/f1p0/1164	1164	1	Sobic.001G018000.1.p	5prime_partial	693	8	FAD/NAD(P)-binding domain	N/A	(CCGCGT)n	0
c15683/f1p1/2291	2300	N/A	Sobic.003G317400.1.p	5prime_partial	693	3	-	CNT0018685	(CGCGGC)n	3.20941
c6433/f1p1/1044	1044	1	Sobic.003G363300.2.p	5prime_partial	693	6	-;;Alpha/Beta hydrolase fold;;Alpha/beta hydrolase fold-1	N/A	none	2.39123
c38192/f1p0/3611	3647	1	Sobic.006G193200.2.p	complete	693	10	Receptor, ligand binding region;;Periplasmic binding protein-like I;;Ionotropic glutamate receptor, L-glutamate and glycine-binding domain;;Ionotropic glutamate receptor	CNT0019489	(GCCGT)n	0.893351
c26884/f1p1/1092	1092	N/A	Sobic.010G203500.1.p	complete	693	7	-;;Cytochrome P450;;Cytochrome P450, E-class, group I	N/A	none	1.53921
c4005/f1p0/3644	3659	1	Sobic.010G242000.1.p	complete	693	4	Leucine-rich repeat domain, L domain-like	CNT0028450	(T)n	0.314656
c20948/f1p0/2537	2537	1	LOC_Os12g13450.1	complete	696	4	Retrotransposon gag domain	N/A	Gypsy-40_SB-LTR,Gypsy-40_SB-I	0.516209
c18304/f1p2/4132	4127	1	mrna28906.1-v1.0-hybrid	complete	696	4	Retrotransposon gag domain	CNT0024662	Gypsy-40_SB-LTR,Gypsy-40_SB-I	0
c13815/f1p0/5362	5372	1	mrna28906.1-v1.0-hybrid	complete	696	4	Retrotransposon gag domain	CNT0021343	Gypsy-40_SB-LTR,Gypsy-40_SB-I	0.0765766
c14967/f1p0/5937	5925	1	mrna28906.1-v1.0-hybrid	complete	696	4	Retrotransposon gag domain	CNT0021343	Gypsy-40_SB-LTR,Gypsy-40_SB-I	0.61956
c17846/f1p1/1048	1046	1	Pahal.B00156.1	5prime_partial	696	3	Domain of unknown function DUF775;;OPI10 family	N/A	none	4.50466
c16489/f1p1/1158	1159	1	Pahal.B00156.1	5prime_partial	696	3	Domain of unknown function DUF775;;OPI10 family	N/A	none	3.95814
c5987/f1p3/1543	1543	1	Sobic.006G020200.1.p	complete	696	4	-;;Chloramphenicol acetyltransferase-like domain;;Transferase	N/A	(GCG)n	3.49203
c15304/f1p0/5207	5297	1	Zm00008a039017_P01	complete	696	5	-	CNT0018767	Gypsy-119_SB-I,Gypsy-91_SB-LTR	0.237699
c44767/f1p0/2348	2349	N/A	Pahal.B01349.2	complete	699	2	Myb/SANT-like domain	CNT0032409	(CCG)n,HARB-12_SBi,HARB-11_SBi	0.819055
c31656/f1p0/1723	1733	1	Pahal.J00586.1	complete	699	7	Hemopexin-like repeats;;Hemopexin-like domain	CNT0029305	none	5.64463
c8872/f1p0/2488	2482	1	Pavir.Aa01599.1.p	complete	699	3	-	CNT0021351	(AC)n,(CGC)n,GA-rich,EnSpm-10_ZM,EnSpm-20_SBi,ENSPM1_ZM,(GCC)n	0.600248
c20755/f1p0/2799	2788	1	Sobic.001G270900.1.p	5prime_partial	699	2	-	lincRNA147_PMID_24635777	Copia29-ZM_LTR,RLG_scAngela_2_1-I	0.638311
c18217/f3p3/1189	1188	1	Sobic.002G227300.1.p	complete	699	2	-	N/A	(GGACGA)n	5.81987
c3946/f1p0/2549	2549	N/A	Sphfalx0006s0386.1.p	complete	699	9	FAD-dependent glycerol-3-phosphate dehydrogenase;;FAD/NAD(P)-binding domain;;FAD dependent oxidoreductase	N/A	none	0
c9982/f1p0/3851	3851	N/A	58773	complete	702	4	-;;VAM6/VPS39 family;;Clathrin, heavy chain/VPS, 7-fold repeat	N/A	none	0
c12440/f1p0/5267	5289	1	Bradi4g03660.2.p	complete	702	7	-;;Leucine-rich repeat;;Leucine-rich repeat domain, L domain-like	CNT0020946	LINE1-21_SBi	0.0866977
c37826/f1p0/1038	1039	1	GRMZM2G012209_P02	5prime_partial	702	6	-;;ICln	N/A	none	5.98748
c8124/f1p6/1896	1895	1	GRMZM2G066291_P01	complete	702	3	-	N/A	(TATTT)n,(ACG)n	4.12275
c40197/f1p0/3610	3610	N/A	Mapoly0001s0045.1.p	complete	702	4	ER membrane protein complex subunit 1;;Domain of unknown function DUF1620	N/A	none	0.0111538
c14953/f1p0/8597	8607	1	Sobic.002G132600.1.p	complete	702	2	-	N/A	A-rich	0
c15172/f1p0/1288	1288	1	Sobic.002G298900.1.p	5prime_partial	702	1	-	CNT0022898	(GCG)n,(G)n	2.07891
c9022/f1p0/2680	2683	1	Sobic.008G163100.1.p	complete	702	1	-	N/A	none	0.398474
c29111/f1p0/1445	1437	N/A	Sobic.010G091800.1.p	complete	702	1	-	N/A	none	0.210153
c33638/f1p0/3695	3486	1	Zm00008a037167_P01	complete	702	2	-	N/A	none	0.11155
c26171/f1p0/3907	3909	N/A	3538	complete	705	4	-;;ATPase, AFG1-like	N/A	(CCCCCT)n,(AC)n	0
c37635/f1p0/2415	2413	1	Cucsa.031240.1	complete	705	6	Integrase, catalytic core;;Ribonuclease H-like domain	CNT0021343	Gypsy-42_SB-I,Gypsy-42_SB-LTR	0.178582
c6439/f1p0/1174	1175	1	Pahal.D02019.1	5prime_partial	705	3	-;;UDP-glucuronosyl/UDP-glucosyltransferase	N/A	none	1.63031
c20722/f1p0/1543	1529	N/A	Sobic.007G141700.1.p	complete	705	11	Leucine-rich repeat;;Leucine-rich repeat domain, L domain-like	lincRNA217_PMID_24635777	none	0.81902
c37437/f1p0/3639	3683	1	Sobic.009G033100.5.p	complete	705	7	-;;Protein kinase-like domain;;Protein kinase domain;;Serine-threonine/tyrosine-protein kinase catalytic domain	CNT0024717	(CATTG)n	0.160208
c1319/f5p3/2160	2160	1	Sobic.009G174700.2.p	5prime_partial	705	N/A	N/A	CNT0012182	none	10.3457
c21570/f1p0/2296	2294	1	Pavir.Bb00153.1.p	complete	708	4	Protein of unknown function DUF1719	CNT0019257	none	1.18785
c21389/f1p0/1538	1538	N/A	Sevir.4G024900.2.p	complete	708	3	-	lincRNA245_PMID_24635777	(TC)n	0.293769
c38158/f1p0/1247	1243	N/A	Sevir.6G254600.1.p	5prime_partial	708	8	F-box domain	N/A	(GCC)n	0.0971809
c2730/f1p0/3585	3585	N/A	Sobic.003G271400.1.p	complete	708	8	-;;Chloride channel, core;;Chloride channel, voltage gated	CNT0016084	GA-rich	0.556501
[truncated: 3,027 more rows]

## Sheet: description
Description:
hit Hoang et al.
The result of BLAST search (with E-value cutoff of 10^-20) of transcripts generated in this study against Hoang et al. transcripts. N/A = no hit, 1 = has hit
ORF type
* complete: a full ORF with the presence of start and stop codons
* 5prime_partial: a partial ORF with stop codon but missing start codon
* 3prime partial: a partial ORF with start codon but missing stop codon
* internal: the transcript can be translated from beginning to end of the transcript sequence (no start codon or stop codon detected)
Detected IPR protein domain
* Each domain name is separated by ;;
* "-" means unintegrated domains that might not yet be curated or might not reach InterPro's standards for integration. However, they may provide information about a protein.
Summary:
	hit with protein database (plant/nr)	* complete ORF	2828
	[4457]	* partial ORF	1342
		* no ORF	287
Number of transcripts without hits to sugarcane nucleotide databases
[5026]	not hit with protein database (plant/nr)	* complete ORF	195
	[569]	* partial ORF	76
	(highlighted in green in 'list' tab)	* no ORF	298
