# Supplementary material for: Uncovering full-length transcript isoforms of sugarcane cultivar Khon Kaen 3 using single-molecule long-read sequencing
Source: PeerJ. 2018 Oct 30;6:e5818. doi: 10.7717/peerj.5818 (PMC6214230; doi:10.7717/peerj.5818)
Supplement: Table S4 — 1,216 PacBio-isoforms assigned as putatively novel lncRNAs are shown along with the details of ORF length (if any), expression levels, and repeat analysis. [file peerj-06-5818-s004.xlsx]

## Sheet: list
PacBio transcript ID	Sequence length	ORF type	ORF length	Expression level (RPKM)	Repeat sequences	Mapping to sorghum genome	Location	Chromosome	Start	End
c10101/f1p0/1035	1036	3prime_partial	15	0.116598	Motif:(TTTTGGA)n	unmapped	N/A	N/A	N/A	N/A
c10128/f2p0/2465	2464	3prime_partial	252	0.658914	Motif:(CCTT)n	unmapped	N/A	N/A	N/A	N/A
c10260/f1p0/785	785	3prime_partial	291	0.979239	Motif:(CCCTT)n	unmapped	N/A	N/A	N/A	N/A
c10477/f1p4/1172	1173	3prime_partial	132	13.1233	Motif:(GGC)n,Motif:(CTGCGTG)n,Motif:(TGTA)n	unmapped	N/A	N/A	N/A	N/A
c10719/f1p0/1623	1623	3prime_partial	225	3.00613	none	unmapped	N/A	N/A	N/A	N/A
c10744/f1p0/2323	2310	3prime_partial	165	1.52372	Motif:(CTCC)n,Motif:EnSpm-N13_SBi	unmapped	N/A	N/A	N/A	N/A
c10978/f1p0/1334	1334	3prime_partial	93	2.90113	none	unmapped	N/A	N/A	N/A	N/A
c11230/f1p0/1435	1435	3prime_partial	27	0.763028	none	unmapped	N/A	N/A	N/A	N/A
c11561/f1p3/1176	1181	3prime_partial	21	11.4326	Motif:(TATATG)n,Motif:(TGTA)n	unmapped	N/A	N/A	N/A	N/A
c12052/f1p0/730	730	3prime_partial	36	3.22674	Motif:(GCTGG)n	unmapped	N/A	N/A	N/A	N/A
c12057/f1p0/2325	2325	3prime_partial	291	1.57063	Motif:G-rich,Motif:EnSpm1_SB	unmapped	N/A	N/A	N/A	N/A
c12177/f1p2/5939	5950	3prime_partial	60	0.304325	Motif:(T)n,Motif:(CTC)n,Motif:(CGTCGC)n,Motif:(TGTAG)n,Motif:(CATG)n,Motif:HARB-N23b_SBi,Motif:(CATATG)n	unmapped	N/A	N/A	N/A	N/A
c12421/f1p0/1708	1708	3prime_partial	294	5.76397	none	unmapped	N/A	N/A	N/A	N/A
c12481/f1p0/4269	4269	3prime_partial	147	0	Motif:(TTT)n	unmapped	N/A	N/A	N/A	N/A
c1266/f2p1/5184	5192	3prime_partial	141	1.05454	Motif:(T)n,Motif:(CTC)n,Motif:(CGTCGC)n,Motif:(TGTAG)n,Motif:(CATG)n,Motif:HARB-N23b_SBi	unmapped	N/A	N/A	N/A	N/A
c12693/f1p2/1268	1273	3prime_partial	15	7.41341	Motif:(TCG)n,Motif:(TCGCCG)n,Motif:NonLTR-1_SBi	unmapped	N/A	N/A	N/A	N/A
c12779/f1p0/2370	2352	3prime_partial	60	0.149141	none	unmapped	N/A	N/A	N/A	N/A
c12996/f1p0/4347	4321	3prime_partial	210	0.368081	Motif:(CT)n,Motif:(TCC)n	unmapped	N/A	N/A	N/A	N/A
c13235/f1p0/2326	2326	3prime_partial	252	0.503311	Motif:(TAATGAT)n	unmapped	N/A	N/A	N/A	N/A
c13626/f1p2/2751	2746	3prime_partial	147	3.31865	Motif:(CGC)n,Motif:(TCCTC)n	unmapped	N/A	N/A	N/A	N/A
c14016/f1p1/2304	2304	3prime_partial	240	0.386234	Motif:RLG_scTat_2_1-I	unmapped	N/A	N/A	N/A	N/A
c14324/f3p1/1236	1239	3prime_partial	15	8.5848	none	unmapped	N/A	N/A	N/A	N/A
c14853/f1p0/1139	1137	3prime_partial	129	4.42543	none	unmapped	N/A	N/A	N/A	N/A
c15280/f2p0/881	881	3prime_partial	228	5.41528	Motif:EnSpm-14_ZM,Motif:(TTG)n	unmapped	N/A	N/A	N/A	N/A
c15317/f1p0/2058	2062	3prime_partial	255	0.494679	Motif:EnSpm-30_SBi	unmapped	N/A	N/A	N/A	N/A
c15644/f1p0/2229	2229	3prime_partial	42	0	Motif:(T)n	unmapped	N/A	N/A	N/A	N/A
c15743/f1p0/1332	1332	3prime_partial	222	0.695272	none	unmapped	N/A	N/A	N/A	N/A
c15865/f1p0/946	974	3prime_partial	63	0.407457	none	unmapped	N/A	N/A	N/A	N/A
c15893/f1p0/1541	1390	3prime_partial	39	0.20289	Motif:NonLTR-1_SBi	unmapped	N/A	N/A	N/A	N/A
c16033/f1p0/1260	1258	3prime_partial	162	5.77733	Motif:HARB-N25_SBi,Motif:LINE1-8_ZM	unmapped	N/A	N/A	N/A	N/A
c16377/f1p0/2228	2226	3prime_partial	165	0	none	unmapped	N/A	N/A	N/A	N/A
c16588/f1p0/1328	1328	3prime_partial	69	3.10668	none	unmapped	N/A	N/A	N/A	N/A
c16740/f1p0/3871	3871	3prime_partial	129	0	Motif:(T)n,Motif:(GCGCC)n	unmapped	N/A	N/A	N/A	N/A
c16829/f1p0/3556	3549	3prime_partial	51	0	Motif:Copia-69_SB-LTR,Motif:CLOUD-1_SB	unmapped	N/A	N/A	N/A	N/A
c16955/f1p0/1469	1468	3prime_partial	57	1.70257	Motif:(A)n,Motif:MuDR-N8_SBi	unmapped	N/A	N/A	N/A	N/A
c17480/f1p2/2449	2448	3prime_partial	123	1.44527	none	unmapped	N/A	N/A	N/A	N/A
c17608/f1p0/1239	1239	3prime_partial	237	1.36542	none	unmapped	N/A	N/A	N/A	N/A
c17746/f1p1/1193	1193	3prime_partial	213	3.8556	none	unmapped	N/A	N/A	N/A	N/A
c17884/f2p1/1061	1061	3prime_partial	228	8.96339	Motif:(ACGGCC)n	unmapped	N/A	N/A	N/A	N/A
c18293/f2p2/1370	1371	3prime_partial	15	22.7379	Motif:G-rich,Motif:(TGTA)n	unmapped	N/A	N/A	N/A	N/A
c18309/f1p0/1324	1290	3prime_partial	72	0.287438	none	mapped	intergenic	Chr01	79100851	79099613
c18783/f1p1/2337	2335	3prime_partial	45	1.2297	Motif:LTR-1_SBi,Motif:Gypsy-N129_SBi-LTR,Motif:Gypsy-124N_SBi-LTR	unmapped	N/A	N/A	N/A	N/A
c20023/f2p0/1292	1293	3prime_partial	54	1.39966	none	unmapped	N/A	N/A	N/A	N/A
c20372/f1p1/2877	2870	3prime_partial	126	0.240155	Motif:RLG_scTat_4_1-I,Motif:Gypsy-93_ZM-LTR	unmapped	N/A	N/A	N/A	N/A
c20712/f1p0/1808	1811	3prime_partial	105	1.03387	Motif:EnSpm-N18_SBi	unmapped	N/A	N/A	N/A	N/A
c20798/f1p1/1253	1253	3prime_partial	15	5.93491	none	unmapped	N/A	N/A	N/A	N/A
c21066/f1p0/6838	6802	3prime_partial	66	0.03881	Motif:(CGC)n,Motif:Tourist1a_SB,Motif:EnSpm-16_SBi,Motif:(T)n	unmapped	N/A	N/A	N/A	N/A
c21270/f1p0/1300	1300	3prime_partial	222	2.785	none	unmapped	N/A	N/A	N/A	N/A
c21380/f1p0/2653	2615	3prime_partial	183	0.292884	none	unmapped	N/A	N/A	N/A	N/A
c22174/f1p0/1362	1365	3prime_partial	252	0.546622	Motif:(CGC)n	unmapped	N/A	N/A	N/A	N/A
c22257/f1p2/2410	2440	3prime_partial	168	0.394742	none	unmapped	N/A	N/A	N/A	N/A
c22270/f1p0/2200	2200	3prime_partial	168	0	Motif:(CGATCG)n,Motif:GA-rich,Motif:A-rich	unmapped	N/A	N/A	N/A	N/A
c22589/f1p0/1324	1324	3prime_partial	234	1.1073	Motif:HARB-13_SBi	unmapped	N/A	N/A	N/A	N/A
c22590/f1p0/4310	4281	3prime_partial	156	0	none	unmapped	N/A	N/A	N/A	N/A
c22654/f1p0/890	890	3prime_partial	75	3.53387	none	unmapped	N/A	N/A	N/A	N/A
c22657/f1p2/1107	1106	3prime_partial	138	0.589401	none	unmapped	N/A	N/A	N/A	N/A
c22658/f1p0/5567	5553	3prime_partial	180	0	none	unmapped	N/A	N/A	N/A	N/A
c22924/f3p2/1322	1322	3prime_partial	15	23.6943	Motif:(TCGCCG)n,Motif:NonLTR-1_SBi	unmapped	N/A	N/A	N/A	N/A
c23128/f1p0/3709	3406	3prime_partial	18	0.0721764	Motif:(TCTC)n,Motif:Gypsy-12_SB-LTR,Motif:Gypsy-25_BD-I,Motif:Gypsy-93_ZM-LTR	unmapped	N/A	N/A	N/A	N/A
c23341/f1p0/3778	3781	3prime_partial	228	0.0266234	Motif:Copia-69_SB-LTR,Motif:CLOUD-1_SB,Motif:MuDR-9_ZM	unmapped	N/A	N/A	N/A	N/A
c23350/f1p3/1195	1190	3prime_partial	222	4.70377	Motif:G-rich	unmapped	N/A	N/A	N/A	N/A
c2381/f2p0/2480	2482	3prime_partial	294	0.285726	Motif:ATHILA-6_SBi-I,Motif:RLG_scTat_2_1-I,Motif:(GAAGA)n	unmapped	N/A	N/A	N/A	N/A
c24192/f1p0/2810	2814	3prime_partial	243	0.486625	Motif:(A)n,Motif:(CCT)n	unmapped	N/A	N/A	N/A	N/A
c24989/f1p0/2350	2350	3prime_partial	180	0.783148	none	unmapped	N/A	N/A	N/A	N/A
c25010/f1p0/755	755	3prime_partial	117	0	none	unmapped	N/A	N/A	N/A	N/A
c25283/f1p0/1276	1280	3prime_partial	66	4.72787	Motif:hAT-7_SBi	unmapped	N/A	N/A	N/A	N/A
c25348/f1p0/1433	1431	3prime_partial	195	1.12551	Motif:HARB-N24_SBi,Motif:RTE-1_TD,Motif:RTE1_ZM	unmapped	N/A	N/A	N/A	N/A
c25548/f1p0/812	808	3prime_partial	27	0.505826	Motif:RLG_scDEL_2_1-LTR	unmapped	N/A	N/A	N/A	N/A
c25812/f1p0/1161	1161	3prime_partial	255	0.639296	Motif:(GGC)n,Motif:G-rich	unmapped	N/A	N/A	N/A	N/A
c25941/f1p0/1587	1587	3prime_partial	69	0.617638	Motif:(TCTCCC)n,Motif:(TATT)n	unmapped	N/A	N/A	N/A	N/A
c26312/f1p0/1229	1229	3prime_partial	117	1.10857	none	unmapped	N/A	N/A	N/A	N/A
c26420/f1p0/1195	1197	3prime_partial	57	0.689589	Motif:hAT-N1c_SB	unmapped	N/A	N/A	N/A	N/A
c26456/f1p0/1358	1370	3prime_partial	51	0.206505	Motif:NonLTR-1_SBi	unmapped	N/A	N/A	N/A	N/A
c26583/f1p0/1056	1056	3prime_partial	141	5.04822	Motif:(CGAGCGG)n,Motif:(CGG)n,Motif:HARB-N2_SB,Motif:(TATT)n	unmapped	N/A	N/A	N/A	N/A
c26666/f1p1/1670	1664	3prime_partial	276	2.19833	Motif:MuDR-N8_SBi,Motif:RLG_scTat_2_1-I	unmapped	N/A	N/A	N/A	N/A
c27462/f1p0/3287	3287	3prime_partial	102	0	none	unmapped	N/A	N/A	N/A	N/A
c27463/f1p0/2755	2738	3prime_partial	54	0	Motif:STOWAWAY13_SB	unmapped	N/A	N/A	N/A	N/A
c27816/f1p1/1665	1668	3prime_partial	15	10.738	none	unmapped	N/A	N/A	N/A	N/A
c28539/f1p0/3588	3578	3prime_partial	252	0.59633	Motif:(CAGCAT)n,Motif:hAT-15_SBi,Motif:Helitron-N16_SBi	unmapped	N/A	N/A	N/A	N/A
c28575/f1p1/2554	2555	3prime_partial	222	0.1714	Motif:G-rich,Motif:EnSpm1_SB	unmapped	N/A	N/A	N/A	N/A
c29095/f1p0/1139	1174	3prime_partial	291	0.21907	Motif:G-rich	unmapped	N/A	N/A	N/A	N/A
c29429/f1p0/1329	1330	3prime_partial	114	2.76831	none	unmapped	N/A	N/A	N/A	N/A
c29782/f1p0/1459	1471	3prime_partial	63	13.5015	Motif:(GCGGACG)n,Motif:(CGG)n,Motif:(GCTCCGA)n,Motif:(TGTA)n	unmapped	N/A	N/A	N/A	N/A
c29829/f1p0/1104	1104	3prime_partial	93	0.656499	none	unmapped	N/A	N/A	N/A	N/A
c30091/f1p0/2069	2072	3prime_partial	21	0	none	unmapped	N/A	N/A	N/A	N/A
c30358/f1p0/2578	2585	3prime_partial	267	0.327107	none	unmapped	N/A	N/A	N/A	N/A
c3093/f1p1/1151	1131	3prime_partial	258	1.54785	Motif:(AGGCA)n	unmapped	N/A	N/A	N/A	N/A
c31347/f1p0/2051	2053	3prime_partial	213	0.45706	none	unmapped	N/A	N/A	N/A	N/A
c31938/f1p0/1199	1198	3prime_partial	57	3.36988	none	unmapped	N/A	N/A	N/A	N/A
c32057/f1p0/1104	1108	3prime_partial	105	0.490597	Motif:Copia-69_SB-LTR	unmapped	N/A	N/A	N/A	N/A
c32255/f1p0/999	1001	3prime_partial	135	0.617779	Motif:(CGCCTCG)n	unmapped	N/A	N/A	N/A	N/A
c3228/f1p1/1513	1513	3prime_partial	15	0.776762	Motif:(TAA)n	unmapped	N/A	N/A	N/A	N/A
c32314/f1p0/1687	1692	3prime_partial	132	0	none	unmapped	N/A	N/A	N/A	N/A
c32430/f1p0/1163	1163	3prime_partial	66	2.70143	none	unmapped	N/A	N/A	N/A	N/A
c32566/f1p0/1187	1186	3prime_partial	42	1.75918	none	unmapped	N/A	N/A	N/A	N/A
c32571/f1p0/2611	2546	3prime_partial	24	0.25927	Motif:(CGC)n,Motif:(TCCTC)n	unmapped	N/A	N/A	N/A	N/A
c32659/f1p0/2330	2258	3prime_partial	282	0.927279	none	unmapped	N/A	N/A	N/A	N/A
c32931/f1p0/600	600	3prime_partial	108	0	Motif:hAT1_SB	unmapped	N/A	N/A	N/A	N/A
c33030/f1p0/1808	1790	3prime_partial	51	0.0112473	Motif:(CG)n,Motif:NonLTR-1_SBi	unmapped	N/A	N/A	N/A	N/A
c33051/f1p0/1348	1368	3prime_partial	132	11.9795	Motif:MuDR-19_SBi	unmapped	N/A	N/A	N/A	N/A
c33075/f1p0/1568	1568	3prime_partial	84	0	none	unmapped	N/A	N/A	N/A	N/A
c3357/f1p0/1545	1406	3prime_partial	36	0.143761	Motif:NonLTR-1_SBi	unmapped	N/A	N/A	N/A	N/A
c3386/f1p1/1287	1287	3prime_partial	57	2.7318	Motif:EnSpm-N13_SBi	unmapped	N/A	N/A	N/A	N/A
c33907/f1p0/2425	2422	3prime_partial	174	1.88767	none	unmapped	N/A	N/A	N/A	N/A
c34611/f1p1/1207	1207	3prime_partial	75	1.47428	Motif:MuDR-N4_SBi,Motif:LTR-1_SBi,Motif:RLG_scDEL_2_1-LTR	unmapped	N/A	N/A	N/A	N/A
c35012/f1p0/4382	4370	3prime_partial	39	0	none	unmapped	N/A	N/A	N/A	N/A
c35502/f1p0/989	989	3prime_partial	57	0	none	unmapped	N/A	N/A	N/A	N/A
c36343/f1p0/476	476	3prime_partial	78	2.875	none	unmapped	N/A	N/A	N/A	N/A
c36431/f1p1/3356	3365	3prime_partial	150	0.360811	Motif:RLG_scDEL_1_1-LTR,Motif:RLG_scDEL_1_3-LTR,Motif:RLG_scDEL_1_2-LTR	unmapped	N/A	N/A	N/A	N/A
c36806/f1p0/672	672	3prime_partial	54	0	none	unmapped	N/A	N/A	N/A	N/A
c37082/f1p0/2091	2040	3prime_partial	174	0	Motif:(GTC)n	unmapped	N/A	N/A	N/A	N/A
c37166/f1p0/1166	1171	3prime_partial	87	2.09751	Motif:(GTC)n	unmapped	N/A	N/A	N/A	N/A
c37617/f1p0/1276	1336	3prime_partial	69	0.629235	none	unmapped	N/A	N/A	N/A	N/A
c37920/f1p0/1465	1409	3prime_partial	246	0.677671	Motif:(CTGCGTG)n	unmapped	N/A	N/A	N/A	N/A
c37938/f1p2/2665	2670	3prime_partial	258	0.80136	Motif:(GGC)n,Motif:G-rich,Motif:EnSpm1_SB	unmapped	N/A	N/A	N/A	N/A
c37987/f1p0/1310	1310	3prime_partial	105	0.975016	Motif:EnSpm-30_SBi,Motif:HARB-N4_ZM,Motif:(TGGCGG)n	unmapped	N/A	N/A	N/A	N/A
c38063/f1p0/805	732	3prime_partial	147	1.23971	Motif:GA-rich,Motif:(TGCAAC)n,Motif:(CTGTC)n	unmapped	N/A	N/A	N/A	N/A
c38131/f1p0/1169	1168	3prime_partial	120	0.189605	Motif:LINE1-67_SBi	unmapped	N/A	N/A	N/A	N/A
c38193/f1p0/1409	1408	3prime_partial	30	3.01704	none	unmapped	N/A	N/A	N/A	N/A
c38211/f1p0/1070	1141	3prime_partial	123	0.967276	Motif:(ATTGCAC)n	unmapped	N/A	N/A	N/A	N/A
c38215/f1p0/1355	1367	3prime_partial	66	0	none	unmapped	N/A	N/A	N/A	N/A
c3852/f1p0/3379	3376	3prime_partial	141	0	none	unmapped	N/A	N/A	N/A	N/A
c38560/f2p2/2746	2746	3prime_partial	243	1.99424	Motif:G-rich,Motif:EnSpm1_SB	unmapped	N/A	N/A	N/A	N/A
c38593/f1p0/1063	1071	3prime_partial	126	0.686817	Motif:LINE1-49_SBi	unmapped	N/A	N/A	N/A	N/A
c38644/f1p0/1569	1576	3prime_partial	78	2.82946	none	unmapped	N/A	N/A	N/A	N/A
c40190/f1p0/5109	5109	3prime_partial	117	0	Motif:(AGAAT)n	unmapped	N/A	N/A	N/A	N/A
c40494/f1p0/1141	1128	3prime_partial	210	0.794796	Motif:(TCG)n,Motif:NonLTR-1_SBi	unmapped	N/A	N/A	N/A	N/A
c4254/f1p0/1094	1087	3prime_partial	276	0	none	unmapped	N/A	N/A	N/A	N/A
c43694/f1p2/2329	2355	3prime_partial	261	1.86412	none	unmapped	N/A	N/A	N/A	N/A
c4371/f1p1/4294	4311	3prime_partial	294	0.059346	Motif:(TCC)n,Motif:HARB-9_SBi	unmapped	N/A	N/A	N/A	N/A
c4408/f1p0/1103	1103	3prime_partial	42	0	none	unmapped	N/A	N/A	N/A	N/A
c44237/f1p0/2352	2354	3prime_partial	15	0	Motif:DNA-4_SBi	unmapped	N/A	N/A	N/A	N/A
c44765/f1p1/2544	2556	3prime_partial	69	0.795539	Motif:EnSpm-N17_SBi	unmapped	N/A	N/A	N/A	N/A
c47000/f1p1/2552	2530	3prime_partial	207	1.59954	Motif:(CT)n	unmapped	N/A	N/A	N/A	N/A
c47464/f1p0/357	358	3prime_partial	117	0.731074	Motif:EnSpm-N16_SBi	unmapped	N/A	N/A	N/A	N/A
c4767/f1p1/698	698	3prime_partial	153	0.0844135	none	unmapped	N/A	N/A	N/A	N/A
c4892/f1p0/2307	2308	3prime_partial	243	1.55064	Motif:G-rich,Motif:EnSpm1_SB	unmapped	N/A	N/A	N/A	N/A
c4919/f1p0/1184	1184	3prime_partial	15	3.34203	none	unmapped	N/A	N/A	N/A	N/A
c5816/f1p0/633	634	3prime_partial	15	1.20669	Motif:DNA-9-2_SBi	unmapped	N/A	N/A	N/A	N/A
c6600/f1p0/1242	1242	3prime_partial	99	0	none	unmapped	N/A	N/A	N/A	N/A
c6979/f1p0/1231	1223	3prime_partial	141	0.393959	none	unmapped	N/A	N/A	N/A	N/A
c7015/f1p0/798	800	3prime_partial	225	0.471597	none	unmapped	N/A	N/A	N/A	N/A
c7328/f1p0/1807	1804	3prime_partial	135	0.923158	none	unmapped	N/A	N/A	N/A	N/A
c8024/f1p0/1594	1594	3prime_partial	132	0	none	unmapped	N/A	N/A	N/A	N/A
c8577/f2p0/1503	1503	3prime_partial	60	8.96354	Motif:(GCTCCGA)n,Motif:(AT)n	unmapped	N/A	N/A	N/A	N/A
c8895/f1p0/2421	2421	3prime_partial	159	0.143228	Motif:(TCCGCG)n,Motif:(CTC)n,Motif:(GGC)n	unmapped	N/A	N/A	N/A	N/A
c9085/f1p0/1369	1371	3prime_partial	66	0.994711	none	unmapped	N/A	N/A	N/A	N/A
c9295/f1p0/1041	1040	3prime_partial	141	0.193583	none	unmapped	N/A	N/A	N/A	N/A
c9457/f1p0/1503	1464	3prime_partial	120	0.30254	Motif:(TA)n	unmapped	N/A	N/A	N/A	N/A
c9654/f1p0/2305	2310	3prime_partial	207	2.74603	Motif:(CCG)n	unmapped	N/A	N/A	N/A	N/A
c10197/f1p0/1492	1492	5prime_partial	147	0.0685557	Motif:ATHILA-3_SBi-LTR,Motif:ATHILA-4_SBi-LTR	unmapped	N/A	N/A	N/A	N/A
c10324/f1p0/2601	2613	5prime_partial	246	0	Motif:(T)n,Motif:(TT)n,Motif:(GT)n,Motif:(TTG)n,Motif:(A)n	unmapped	N/A	N/A	N/A	N/A
c10821/f1p0/4200	4123	5prime_partial	132	0.0473792	Motif:(ATTTGT)n	unmapped	N/A	N/A	N/A	N/A
c11053/f1p0/1833	1797	5prime_partial	132	0	Motif:(T)n	unmapped	N/A	N/A	N/A	N/A
c11528/f1p0/1172	1138	5prime_partial	261	0.0531074	Motif:(CT)n	unmapped	N/A	N/A	N/A	N/A
c11774/f4p2/1141	1141	5prime_partial	180	3.18223	Motif:(CCT)n	unmapped	N/A	N/A	N/A	N/A
c11819/f1p1/1402	1406	5prime_partial	213	2.32479	Motif:(TC)n	unmapped	N/A	N/A	N/A	N/A
c12002/f1p0/1252	1257	5prime_partial	273	0.478234	none	unmapped	N/A	N/A	N/A	N/A
c12635/f1p0/976	976	5prime_partial	132	2.31907	Motif:(GCC)n,Motif:(TC)n	unmapped	N/A	N/A	N/A	N/A
c12792/f1p1/1714	1712	5prime_partial	174	0.658308	Motif:Helitron-N15_SBi,Motif:LATIDU1_TM,Motif:RLG_scTat_2_1-I,Motif:RLG_scDEL_4_1-LTR	unmapped	N/A	N/A	N/A	N/A
c13453/f1p3/5054	5078	5prime_partial	267	1.40876	Motif:(CACAG)n,Motif:Gypsy-125N_SBi-LTR	unmapped	N/A	N/A	N/A	N/A
c15660/f2p0/3426	3432	5prime_partial	174	0	Motif:RLG_scDEL_1_1-LTR,Motif:RLG_scDEL_1_2-LTR	unmapped	N/A	N/A	N/A	N/A
c16067/f1p0/1234	1234	5prime_partial	297	0.730078	Motif:EnSpm-N1_SBi	unmapped	N/A	N/A	N/A	N/A
c16081/f1p0/2933	2942	5prime_partial	267	0.765232	none	unmapped	N/A	N/A	N/A	N/A
c16243/f1p0/3841	3841	5prime_partial	63	0	Motif:(CGG)n	unmapped	N/A	N/A	N/A	N/A
c16620/f1p0/2403	2421	5prime_partial	255	0.661361	none	unmapped	N/A	N/A	N/A	N/A
c16944/f1p0/3847	3670	5prime_partial	156	0.121221	Motif:(T)n,Motif:Gypsy-64_SB-LTR	unmapped	N/A	N/A	N/A	N/A
c18020/f1p0/8038	7858	5prime_partial	297	0.0417952	Motif:(CGTCT)n	unmapped	N/A	N/A	N/A	N/A
c18322/f1p0/2458	2455	5prime_partial	66	0	Motif:(T)n,Motif:GA-rich,Motif:A-rich	unmapped	N/A	N/A	N/A	N/A
c18454/f1p0/3807	3944	5prime_partial	171	0.115266	Motif:(ATCGAA)n,Motif:RTE-1_TD,Motif:(T)n	unmapped	N/A	N/A	N/A	N/A
c18463/f1p0/2030	2013	5prime_partial	225	0	Motif:(G)n	unmapped	N/A	N/A	N/A	N/A
c18466/f1p0/2390	2398	5prime_partial	231	0.349053	Motif:(GCC)n	unmapped	N/A	N/A	N/A	N/A
c18671/f1p0/4145	4046	5prime_partial	261	0.0447834	Motif:(T)n,Motif:RTE-1_SBi,Motif:(A)n	unmapped	N/A	N/A	N/A	N/A
c18828/f1p0/1309	1307	5prime_partial	102	5.86199	none	unmapped	N/A	N/A	N/A	N/A
c19234/f1p0/2906	2926	5prime_partial	285	0.227377	Motif:HARB-3_SBi	unmapped	N/A	N/A	N/A	N/A
c19816/f1p0/416	416	5prime_partial	138	191.108	none	unmapped	N/A	N/A	N/A	N/A
c19904/f1p0/1219	1219	5prime_partial	108	0.96339	none	mapped	intergenic	Chr02	20073678	20072550
c19933/f1p0/1345	1330	5prime_partial	219	0.274619	Motif:GA-rich	unmapped	N/A	N/A	N/A	N/A
c20335/f1p0/1798	1818	5prime_partial	207	0	Motif:(T)n	unmapped	N/A	N/A	N/A	N/A
c20366/f1p0/2264	2264	5prime_partial	213	0.204528	Motif:LINE1-7_SBi,Motif:(GAGG)n	unmapped	N/A	N/A	N/A	N/A
c20506/f1p0/2211	2211	5prime_partial	216	0.661202	none	unmapped	N/A	N/A	N/A	N/A
c20742/f1p1/2623	2629	5prime_partial	180	0	none	unmapped	N/A	N/A	N/A	N/A
c20910/f1p0/681	678	5prime_partial	270	0	Motif:LINE1-5_SBi	unmapped	N/A	N/A	N/A	N/A
c21633/f1p0/1174	1178	5prime_partial	258	0.553443	Motif:EnSpm-41N_SBi	unmapped	N/A	N/A	N/A	N/A
c22754/f1p0/2406	2407	5prime_partial	225	0.720895	none	unmapped	N/A	N/A	N/A	N/A
c22840/f1p1/2841	2844	5prime_partial	210	0	none	unmapped	N/A	N/A	N/A	N/A
c22967/f1p1/2564	2566	5prime_partial	183	0.263165	none	unmapped	N/A	N/A	N/A	N/A
c23259/f1p0/4770	4731	5prime_partial	147	0	Motif:(T)n	unmapped	N/A	N/A	N/A	N/A
c23437/f1p0/6502	6514	5prime_partial	138	0.0649041	Motif:(T)n,Motif:(GCCCT)n,Motif:(A)n	unmapped	N/A	N/A	N/A	N/A
c23475/f1p0/2740	2722	5prime_partial	78	0.16692	Motif:MuDR-N9_SBi,Motif:MuDR-N8_SBi,Motif:(GGCGGA)n	unmapped	N/A	N/A	N/A	N/A
c2439/f1p0/2372	2372	5prime_partial	111	2.4234	Motif:(CT)n,Motif:(CCTCCT)n	unmapped	N/A	N/A	N/A	N/A
c24479/f2p4/1356	1356	5prime_partial	48	7.21024	Motif:GA-rich,Motif:(AT)n	unmapped	N/A	N/A	N/A	N/A
c24606/f1p0/5507	5518	5prime_partial	270	0.392192	Motif:(T)n	unmapped	N/A	N/A	N/A	N/A
c24680/f1p1/2787	2789	5prime_partial	150	2.16558	Motif:(AATTTG)n,Motif:EnSpm-1_HV	unmapped	N/A	N/A	N/A	N/A
c24862/f1p0/1904	1899	5prime_partial	141	0	Motif:(T)n	unmapped	N/A	N/A	N/A	N/A
c24865/f1p0/2282	2282	5prime_partial	204	0	Motif:(T)n	unmapped	N/A	N/A	N/A	N/A
c25137/f1p1/2184	2159	5prime_partial	90	0.54179	Motif:(T)n,Motif:(AAGA)n,Motif:(TTCT)n	unmapped	N/A	N/A	N/A	N/A
c25724/f1p0/1470	1519	5prime_partial	273	0.501281	none	unmapped	N/A	N/A	N/A	N/A
c26183/f1p0/3836	3839	5prime_partial	57	0	Motif:(T)n,Motif:(CCG)n	unmapped	N/A	N/A	N/A	N/A
c26376/f2p7/2561	2560	5prime_partial	297	0	Motif:(CTCTC)n	unmapped	N/A	N/A	N/A	N/A
c26395/f1p0/1119	1120	5prime_partial	228	0	none	unmapped	N/A	N/A	N/A	N/A
c26859/f1p0/953	953	5prime_partial	177	22.8817	Motif:(CGG)n	unmapped	N/A	N/A	N/A	N/A
c27277/f1p0/4011	4043	5prime_partial	207	0	none	unmapped	N/A	N/A	N/A	N/A
c27365/f1p0/1133	1131	5prime_partial	219	0	Motif:ZhAT6_ZM,Motif:(TTGTGA)n	unmapped	N/A	N/A	N/A	N/A
c27448/f1p0/1512	1500	5prime_partial	153	0.145246	Motif:(A)n	unmapped	N/A	N/A	N/A	N/A
c28122/f1p1/1201	1204	5prime_partial	87	0.677594	Motif:(T)n,Motif:(ATTTAC)n,Motif:(TAATG)n	unmapped	N/A	N/A	N/A	N/A
c28179/f1p0/1162	1165	5prime_partial	285	0.120969	Motif:(GGTGGC)n	unmapped	N/A	N/A	N/A	N/A
c28412/f1p0/3049	2956	5prime_partial	81	0.0469987	Motif:(T)n,Motif:RLG_scMaximus_1_2-LTR	unmapped	N/A	N/A	N/A	N/A
c28597/f1p0/1119	1135	5prime_partial	228	6.52759	Motif:(CGCT)n	unmapped	N/A	N/A	N/A	N/A
c28604/f1p0/3963	3952	5prime_partial	261	0.0203772	Motif:(A)n	unmapped	N/A	N/A	N/A	N/A
c2862/f1p0/1369	1369	5prime_partial	207	5.29524	Motif:GA-rich,Motif:(CGG)n,Motif:LATIDU1_TM	unmapped	N/A	N/A	N/A	N/A
c29307/f1p0/1743	1746	5prime_partial	267	0.918981	Motif:(CCTT)n,Motif:(T)n	unmapped	N/A	N/A	N/A	N/A
c29316/f1p0/2542	2542	5prime_partial	210	0.541038	Motif:hAT-13_SBi	unmapped	N/A	N/A	N/A	N/A
c29380/f1p0/2524	2523	5prime_partial	291	4.61457	Motif:(CTCTC)n	unmapped	N/A	N/A	N/A	N/A
c29564/f1p0/4899	4753	5prime_partial	297	0	Motif:ATHILA-6_SBi-I,Motif:RLG_scTat_2_1-I,Motif:(GAAGA)n	unmapped	N/A	N/A	N/A	N/A
c29673/f1p0/5012	5011	5prime_partial	264	0	Motif:(T)n	unmapped	N/A	N/A	N/A	N/A
c29731/f1p0/2011	2011	5prime_partial	177	0.210236	Motif:(T)n	unmapped	N/A	N/A	N/A	N/A
c29858/f1p0/2664	2687	5prime_partial	282	0.31347	Motif:(ATTGCAC)n	unmapped	N/A	N/A	N/A	N/A
c30203/f1p2/1936	1948	5prime_partial	210	3.61347	Motif:(T)n,Motif:(CTCC)n,Motif:GA-rich	unmapped	N/A	N/A	N/A	N/A
c30403/f1p0/3048	3034	5prime_partial	138	0.0729925	Motif:(T)n	unmapped	N/A	N/A	N/A	N/A
c30713/f1p0/3755	3768	5prime_partial	174	0.186503	Motif:REP2_SB,Motif:(CCG)n,Motif:(CCCCCG)n,Motif:(T)n,Motif:RLG_scTat_2_1-I,Motif:EnSpm-41N2_SBi	unmapped	N/A	N/A	N/A	N/A
c30976/f1p0/2347	2331	5prime_partial	207	0.413767	Motif:(GCGCT)n,Motif:(CCTGCT)n,Motif:STOWAWAY16_SB	unmapped	N/A	N/A	N/A	N/A
c31273/f1p0/1975	1920	5prime_partial	114	0.0210393	none	unmapped	N/A	N/A	N/A	N/A
c31392/f1p0/2393	2387	5prime_partial	114	0.189249	Motif:(T)n,Motif:(ACAACCG)n	unmapped	N/A	N/A	N/A	N/A
c31495/f1p0/2156	2167	5prime_partial	147	1.16063	Motif:(T)n	unmapped	N/A	N/A	N/A	N/A
c31498/f1p0/3362	3385	5prime_partial	108	0.0133761	Motif:(T)n	unmapped	N/A	N/A	N/A	N/A
c31796/f1p0/1623	1619	5prime_partial	168	0	Motif:A-rich	unmapped	N/A	N/A	N/A	N/A
c31999/f1p0/1165	1165	5prime_partial	195	0.191908	Motif:Helitron-N15_SBi,Motif:(TGATGA)n	unmapped	N/A	N/A	N/A	N/A
c32069/f1p2/2612	2614	5prime_partial	228	0.481476	none	unmapped	N/A	N/A	N/A	N/A
c32206/f1p1/1203	1201	5prime_partial	294	9.45378	none	unmapped	N/A	N/A	N/A	N/A
c32214/f1p0/758	758	5prime_partial	276	3.66531	none	unmapped	N/A	N/A	N/A	N/A
c32385/f1p0/1351	1301	5prime_partial	120	0.0157664	none	unmapped	N/A	N/A	N/A	N/A
c32649/f1p3/1297	1302	5prime_partial	249	1.32538	Motif:EnSpm1_SB	unmapped	N/A	N/A	N/A	N/A
c33029/f1p0/1452	1455	5prime_partial	195	0	none	unmapped	N/A	N/A	N/A	N/A
c33310/f1p0/2010	2020	5prime_partial	291	0.542522	none	unmapped	N/A	N/A	N/A	N/A
c3349/f1p0/3776	3776	5prime_partial	264	0	Motif:(CGAG)n,Motif:(GC)n,Motif:(A)n	unmapped	N/A	N/A	N/A	N/A
c34137/f1p0/2720	2628	5prime_partial	219	0.05084	Motif:(CTCTG)n,Motif:(CTCTCC)n,Motif:(TTAA)n,Motif:A-rich	unmapped	N/A	N/A	N/A	N/A
c34838/f1p0/1114	1121	5prime_partial	102	3.09447	Motif:Copia-38-LTR_ZM,Motif:(CGACAT)n	unmapped	N/A	N/A	N/A	N/A
c35700/f1p0/4339	4334	5prime_partial	168	0	Motif:(T)n	unmapped	N/A	N/A	N/A	N/A
c35804/f1p0/1361	1344	5prime_partial	258	1.30183	Motif:(CCTCC)n,Motif:Mariner-4_SBi,Motif:STOWAWAY21_SB,Motif:EnSpm-36_SBi,Motif:EnSpm-30_SBi,Motif:(A)n	unmapped	N/A	N/A	N/A	N/A
c3607/f1p0/1373	1373	5prime_partial	165	1.38401	none	unmapped	N/A	N/A	N/A	N/A
c36250/f1p0/2014	2003	5prime_partial	153	0.0138461	Motif:(T)n	unmapped	N/A	N/A	N/A	N/A
c37061/f1p0/1533	1548	5prime_partial	123	0.0699087	none	mapped	intergenic	Chr08	3616950	3618510
c37206/f1p1/1485	1501	5prime_partial	174	2.95058	none	unmapped	N/A	N/A	N/A	N/A
c38418/f1p0/1509	1509	5prime_partial	114	4.76299	Motif:GA-rich,Motif:Gypsy-130_SBi-LTR	unmapped	N/A	N/A	N/A	N/A
c38443/f1p0/1598	1536	5prime_partial	69	2.34029	Motif:(T)n	unmapped	N/A	N/A	N/A	N/A
c38627/f1p0/3107	2959	5prime_partial	291	0.0938477	Motif:(TATT)n	unmapped	N/A	N/A	N/A	N/A
c39490/f1p0/5608	5612	5prime_partial	60	0	none	unmapped	N/A	N/A	N/A	N/A
c39924/f1p0/2943	3011	5prime_partial	258	0.26325	Motif:LINE1-5_SBi	unmapped	N/A	N/A	N/A	N/A
c40161/f1p0/2368	2369	5prime_partial	171	0.324622	Motif:EnSpm-30_SBi	unmapped	N/A	N/A	N/A	N/A
c40196/f1p0/2565	2573	5prime_partial	270	0.349546	Motif:(CCG)n,Motif:(CCCCCG)n,Motif:(T)n,Motif:RLG_scTat_2_1-I	unmapped	N/A	N/A	N/A	N/A
c40249/f1p0/3482	3396	5prime_partial	162	0.0241849	Motif:SINE2-1_ZM	unmapped	N/A	N/A	N/A	N/A
c40526/f1p0/4277	4218	5prime_partial	234	0.0510052	none	unmapped	N/A	N/A	N/A	N/A
c43348/f1p0/3932	3931	5prime_partial	123	0	Motif:Helitron-5_SBi,Motif:ATHILA-7_SBi-I	unmapped	N/A	N/A	N/A	N/A
c4420/f2p0/2303	2306	5prime_partial	162	0.322826	none	unmapped	N/A	N/A	N/A	N/A
c5601/f1p0/4176	4175	5prime_partial	240	0	Motif:(T)n	unmapped	N/A	N/A	N/A	N/A
c5944/f1p0/616	617	5prime_partial	189	15.5318	none	mapped	intergenic	Chr03	51157647	51158282
c6376/f1p0/2458	2447	5prime_partial	294	0	Motif:(A)n	unmapped	N/A	N/A	N/A	N/A
c6596/f1p0/1354	1354	5prime_partial	75	2.25428	Motif:(CCTCCGG)n,Motif:(CCT)n,Motif:(C)n	unmapped	N/A	N/A	N/A	N/A
c6940/f1p0/1241	1248	5prime_partial	87	0.345608	Motif:RLG_scDEL_2_2-LTR,Motif:RLG_scDEL_2_1-LTR,Motif:(TCA)n,Motif:LTR-1_SBi	unmapped	N/A	N/A	N/A	N/A
c7242/f1p0/926	927	5prime_partial	234	0.118536	Motif:(CCT)n	mapped	intergenic	Chr03	73004451	73002495
c7422/f1p2/1167	1168	5prime_partial	180	0	Motif:(CCT)n	unmapped	N/A	N/A	N/A	N/A
c7467/f2p1/1262	1262	5prime_partial	213	13.2659	none	unmapped	N/A	N/A	N/A	N/A
c7480/f1p0/3626	3721	5prime_partial	294	0.151227	Motif:(AAGAAAT)n	unmapped	N/A	N/A	N/A	N/A
c8426/f1p0/1276	1275	5prime_partial	231	1.38536	Motif:RLG_scTat_2_1-I	unmapped	N/A	N/A	N/A	N/A
c8896/f1p1/1096	1095	5prime_partial	264	4.07977	Motif:EnSpm-35_SBi	unmapped	N/A	N/A	N/A	N/A
c9048/f1p1/3508	3508	5prime_partial	147	0.47743	Motif:EnSpm-N12_SBi,Motif:EnSpm-N1_SB	unmapped	N/A	N/A	N/A	N/A
c9063/f1p3/3589	3589	5prime_partial	249	0.0636935	none	unmapped	N/A	N/A	N/A	N/A
c9349/f1p1/2351	2361	5prime_partial	276	0.179509	none	unmapped	N/A	N/A	N/A	N/A
c9994/f1p0/1355	1355	5prime_partial	150	7.29742	none	unmapped	N/A	N/A	N/A	N/A
c10124/f1p0/2509	2509	complete	249	0.990363	Motif:EnSpm-41N_SBi	unmapped	N/A	N/A	N/A	N/A
c10142/f1p0/2400	2398	complete	282	1.23185	Motif:(CGAGCGG)n,Motif:(GCT)n	unmapped	N/A	N/A	N/A	N/A
c10170/f1p0/1221	1221	complete	225	0.181375	none	unmapped	N/A	N/A	N/A	N/A
c10175/f1p0/5086	5086	complete	195	0	none	unmapped	N/A	N/A	N/A	N/A
c10289/f1p0/2475	2471	complete	285	0.409618	none	unmapped	N/A	N/A	N/A	N/A
c10351/f1p0/2526	2522	complete	276	0.227468	Motif:(CTC)n	unmapped	N/A	N/A	N/A	N/A
c10415/f1p0/3997	3994	complete	294	0.701487	Motif:(TTTTC)n,Motif:RLG_scDEL_1_2-LTR,Motif:RLG_scDEL_1_4-LTR,Motif:RLG_scDEL_1_3-LTR,Motif:RLG_scDEL_1_5-LTR	unmapped	N/A	N/A	N/A	N/A
c10417/f1p0/3763	3642	complete	135	0.599334	none	unmapped	N/A	N/A	N/A	N/A
c1049/f3p2/6119	6123	complete	225	0.73006	Motif:(T)n,Motif:(CTC)n,Motif:(CGTCGC)n,Motif:(TGTAG)n,Motif:(CATG)n,Motif:HARB-N23b_SBi	unmapped	N/A	N/A	N/A	N/A
c10493/f1p0/1501	1515	complete	207	0.189079	Motif:(TGGATCAGC)n	unmapped	N/A	N/A	N/A	N/A
c10637/f1p0/2746	2737	complete	246	0.892831	none	unmapped	N/A	N/A	N/A	N/A
c10683/f1p0/3417	3594	complete	258	0.0449441	none	unmapped	N/A	N/A	N/A	N/A
c10749/f1p0/1056	1056	complete	228	1.22272	none	unmapped	N/A	N/A	N/A	N/A
c10754/f1p2/1144	1144	complete	198	20.9785	none	unmapped	N/A	N/A	N/A	N/A
c10764/f1p0/1099	1099	complete	213	0.507707	none	unmapped	N/A	N/A	N/A	N/A
c10852/f1p0/7342	7224	complete	213	0	Motif:(CGG)n,Motif:(A)n,Motif:A-rich,Motif:Helitron-N16_SBi,Motif:(T)n	unmapped	N/A	N/A	N/A	N/A
c10950/f1p1/3994	3997	complete	267	0.245818	Motif:(GCC)n,Motif:LINE1-6_SBi	unmapped	N/A	N/A	N/A	N/A
c10963/f1p0/1468	1476	complete	174	0.57288	none	unmapped	N/A	N/A	N/A	N/A
c11019/f1p1/1205	1205	complete	192	1.76513	none	unmapped	N/A	N/A	N/A	N/A
c11129/f1p0/2809	2813	complete	162	0.436577	Motif:EnSpm-19_SBi,Motif:(CTTTTT)n,Motif:EnSpm-N17_SBi	unmapped	N/A	N/A	N/A	N/A
c11155/f1p1/3598	3593	complete	270	3.06068	Motif:Copia-106_SB-LTR	unmapped	N/A	N/A	N/A	N/A
c11165/f1p0/1605	1607	complete	99	0.914553	none	unmapped	N/A	N/A	N/A	N/A
c11186/f2p2/2695	2695	complete	264	5.69141	Motif:(CTCTC)n	unmapped	N/A	N/A	N/A	N/A
c11255/f1p1/1141	1139	complete	291	0	Motif:(AG)n,Motif:G-rich	unmapped	N/A	N/A	N/A	N/A
c11287/f1p0/1624	1623	complete	96	0.269297	none	unmapped	N/A	N/A	N/A	N/A
c11298/f1p0/4177	3952	complete	237	0.488111	Motif:(TCCGCT)n,Motif:(CCCTT)n	unmapped	N/A	N/A	N/A	N/A
c11308/f1p2/2729	2729	complete	237	3.15219	Motif:(GGC)n,Motif:G-rich,Motif:EnSpm1_SB	unmapped	N/A	N/A	N/A	N/A
c11438/f1p1/2585	2585	complete	108	0.212581	Motif:BAGY1_HV_LTR,Motif:(CTATA)n,Motif:(AGGATTA)n	unmapped	N/A	N/A	N/A	N/A
c11482/f1p0/2554	2558	complete	207	0.868698	none	unmapped	N/A	N/A	N/A	N/A
c11577/f1p0/1366	1365	complete	264	0.25006	Motif:(G)n	unmapped	N/A	N/A	N/A	N/A
c11624/f1p0/2755	2755	complete	225	0.0657691	Motif:(ATTTTTA)n	unmapped	N/A	N/A	N/A	N/A
c11647/f1p0/1637	1616	complete	156	0.410295	none	unmapped	N/A	N/A	N/A	N/A
c11676/f1p0/1441	1440	complete	144	3.05106	none	unmapped	N/A	N/A	N/A	N/A
c11692/f1p0/4232	4177	complete	288	0	Motif:(C)n	unmapped	N/A	N/A	N/A	N/A
c11704/f1p0/1450	1451	complete	201	0.160817	none	unmapped	N/A	N/A	N/A	N/A
c11718/f1p0/1425	1430	complete	237	1.19222	Motif:MuDR-19_SBi	unmapped	N/A	N/A	N/A	N/A
c11745/f1p0/2481	2481	complete	162	1.01935	none	unmapped	N/A	N/A	N/A	N/A
c11777/f1p0/1732	1727	complete	246	2.0866	Motif:(CCT)n	unmapped	N/A	N/A	N/A	N/A
c11777/f1p0/2441	2441	complete	96	0	none	unmapped	N/A	N/A	N/A	N/A
c11788/f1p0/2845	2826	complete	156	0.746236	none	unmapped	N/A	N/A	N/A	N/A
c11871/f1p0/5910	5887	complete	102	0.0205191	Motif:(TT)n	unmapped	N/A	N/A	N/A	N/A
c11895/f1p0/1277	1278	complete	252	3.09177	none	unmapped	N/A	N/A	N/A	N/A
c11907/f2p0/1225	1225	complete	132	0.456919	Motif:EnSpm-30_SBi,Motif:GA-rich	unmapped	N/A	N/A	N/A	N/A
c11939/f1p0/2304	2302	complete	126	0.357182	Motif:(TCCTCT)n	unmapped	N/A	N/A	N/A	N/A
c11953/f1p0/3762	3762	complete	171	0.143926	Motif:Helitron-N1_SBi	unmapped	N/A	N/A	N/A	N/A
c11971/f2p1/2494	2494	complete	168	3.62452	Motif:(GT)n	unmapped	N/A	N/A	N/A	N/A
c12018/f1p0/5653	5722	complete	243	0.171216	Motif:(T)n,Motif:Helitron-N4_SBi,Motif:LINE1-18_ZM	unmapped	N/A	N/A	N/A	N/A
c12059/f1p0/2713	2706	complete	171	0.0372	Motif:MuDR-N6_SBi	unmapped	N/A	N/A	N/A	N/A
c12216/f1p0/2284	2286	complete	156	0.350943	none	unmapped	N/A	N/A	N/A	N/A
c12367/f1p0/2484	2435	complete	147	1.7229	Motif:(CGCCTGC)n	unmapped	N/A	N/A	N/A	N/A
c12408/f1p0/1276	1276	complete	147	11.1876	Motif:(CCGCGG)n,Motif:Gypsy-125N_SBi-LTR	unmapped	N/A	N/A	N/A	N/A
c12428/f1p0/1397	1397	complete	135	0	none	unmapped	N/A	N/A	N/A	N/A
c12460/f1p0/1198	1198	complete	147	0.751867	none	unmapped	N/A	N/A	N/A	N/A
c12542/f1p0/2595	2601	complete	123	1.07672	Motif:LINE1-49_SBi,Motif:(ACTCACA)n	unmapped	N/A	N/A	N/A	N/A
c12562/f1p0/1314	1313	complete	285	1.38283	Motif:(CTCC)n	unmapped	N/A	N/A	N/A	N/A
c12828/f1p0/2311	2311	complete	63	1.607	none	unmapped	N/A	N/A	N/A	N/A
c12873/f1p0/891	904	complete	222	1.33108	Motif:Gypsy-204_ZM-LTR	unmapped	N/A	N/A	N/A	N/A
c12902/f1p0/2731	2733	complete	294	0	Motif:(T)n	unmapped	N/A	N/A	N/A	N/A
c12974/f1p0/2441	2461	complete	144	0.628388	none	unmapped	N/A	N/A	N/A	N/A
c13023/f1p0/1166	1164	complete	135	0.672765	none	unmapped	N/A	N/A	N/A	N/A
c13066/f1p0/1318	1318	complete	156	1.77192	none	unmapped	N/A	N/A	N/A	N/A
c13124/f1p0/1206	1206	complete	210	1.44054	Motif:(GGA)n	unmapped	N/A	N/A	N/A	N/A
c13128/f1p0/755	763	complete	243	2.61223	none	unmapped	N/A	N/A	N/A	N/A
c13234/f1p1/1262	1270	complete	249	0.221932	Motif:EnSpm1_SB	unmapped	N/A	N/A	N/A	N/A
c13350/f1p0/2522	2517	complete	279	0.87158	Motif:(CT)n,Motif:Helitron-1B_SBi	unmapped	N/A	N/A	N/A	N/A
c13450/f1p0/5309	5304	complete	174	0.468144	Motif:STOWAWAY13_SB	unmapped	N/A	N/A	N/A	N/A
c13572/f1p0/3518	3502	complete	258	0.490278	none	unmapped	N/A	N/A	N/A	N/A
c13657/f1p0/3457	3458	complete	186	0.196001	none	unmapped	N/A	N/A	N/A	N/A
c14035/f1p0/2554	2541	complete	210	0.0979111	Motif:(CT)n	unmapped	N/A	N/A	N/A	N/A
c14047/f1p0/3510	3439	complete	219	0.0203488	Motif:G-rich	unmapped	N/A	N/A	N/A	N/A
c14063/f1p0/2513	2512	complete	294	0.281714	Motif:(CCTCCG)n,Motif:Copia-138_SB-I	unmapped	N/A	N/A	N/A	N/A
c14108/f1p0/3805	3882	complete	213	0.137689	Motif:EnSpm-N17_SBi,Motif:Helitron-2_SBi,Motif:Helitron-1_SBi	unmapped	N/A	N/A	N/A	N/A
c14473/f1p0/1672	1674	complete	192	0.10376	Motif:(CGC)n	unmapped	N/A	N/A	N/A	N/A
c14522/f1p0/5833	5870	complete	177	0	Motif:(T)n,Motif:(TAACA)n	unmapped	N/A	N/A	N/A	N/A
c14613/f1p1/3702	3705	complete	189	0.708762	Motif:(T)n,Motif:(GCAGCAA)n	unmapped	N/A	N/A	N/A	N/A
c14718/f1p0/4045	3966	complete	63	0.0779715	none	unmapped	N/A	N/A	N/A	N/A
c14722/f1p0/1279	1279	complete	252	3.09018	Motif:(CCTC)n	unmapped	N/A	N/A	N/A	N/A
c14742/f1p0/1198	1198	complete	225	1.02512	none	unmapped	N/A	N/A	N/A	N/A
c14759/f1p0/1285	1297	complete	102	1.08946	Motif:EnSpm-41N_SBi	unmapped	N/A	N/A	N/A	N/A
c14808/f2p4/3042	3042	complete	183	1.19	Motif:(CGCCTC)n,Motif:(GCCCC)n,Motif:(CT)n,Motif:(CTCTC)n	unmapped	N/A	N/A	N/A	N/A
c14942/f1p2/1430	1430	complete	258	4.55066	none	unmapped	N/A	N/A	N/A	N/A
c15037/f1p1/996	996	complete	228	0.248312	Motif:(CAGG)n	unmapped	N/A	N/A	N/A	N/A
c15370/f1p0/5639	5639	complete	177	0	none	unmapped	N/A	N/A	N/A	N/A
c15386/f1p0/1189	1192	complete	177	0.289314	none	unmapped	N/A	N/A	N/A	N/A
c15420/f1p0/5352	5545	complete	240	0.0714162	none	unmapped	N/A	N/A	N/A	N/A
c15436/f1p0/1529	1529	complete	180	1.70655	none	unmapped	N/A	N/A	N/A	N/A
c15463/f1p0/2560	2553	complete	129	0.0566085	none	unmapped	N/A	N/A	N/A	N/A
c15502/f1p0/1701	1701	complete	177	0.685799	none	unmapped	N/A	N/A	N/A	N/A
c15509/f3p0/3471	3464	complete	282	0.215043	Motif:Copia2_HV_I-int,Motif:ENSPM-9_ZM	unmapped	N/A	N/A	N/A	N/A
c15513/f1p0/1385	1384	complete	159	1.06173	none	unmapped	N/A	N/A	N/A	N/A
c15549/f1p0/1244	1245	complete	156	1.88437	Motif:(CTCCG)n	unmapped	N/A	N/A	N/A	N/A
c15659/f1p0/1558	1558	complete	87	0	none	unmapped	N/A	N/A	N/A	N/A
c15699/f1p0/1400	1401	complete	264	1.72442	none	unmapped	N/A	N/A	N/A	N/A
c15763/f2p0/3526	3523	complete	162	0.0861096	Motif:(GAC)n,Motif:EnSpm-41N2_SBi,Motif:(TTACTC)n	unmapped	N/A	N/A	N/A	N/A
c15773/f1p0/3157	3093	complete	144	0.260364	Motif:(G)n,Motif:GA-rich	unmapped	N/A	N/A	N/A	N/A
c15804/f1p1/6035	6033	complete	204	0.0626262	Motif:STOWAWAY12_SB	unmapped	N/A	N/A	N/A	N/A
c15819/f1p0/3095	3084	complete	288	0.628467	none	unmapped	N/A	N/A	N/A	N/A
c15839/f1p0/746	744	complete	129	4.65432	Motif:GA-rich,Motif:Tourist1a_SB	unmapped	N/A	N/A	N/A	N/A
c15866/f1p0/2399	2386	complete	135	0	Motif:(T)n	unmapped	N/A	N/A	N/A	N/A
c15874/f1p0/2297	2290	complete	216	6.27861	Motif:hAT-N6_SBi,Motif:Helitron-N14_SBi,Motif:(GATTTG)n,Motif:(AATGC)n	unmapped	N/A	N/A	N/A	N/A
c15875/f1p0/3625	3646	complete	207	0.542837	Motif:(CTCCT)n,Motif:(TCCTCC)n,Motif:Helitron-N14_SBi	unmapped	N/A	N/A	N/A	N/A
c15915/f1p0/5450	5444	complete	228	0	Motif:(GTTTAT)n	unmapped	N/A	N/A	N/A	N/A
c15948/f1p0/6800	6791	complete	207	0.260911	Motif:(T)n,Motif:(TCTT)n	unmapped	N/A	N/A	N/A	N/A
c16054/f1p0/2341	2349	complete	213	0.966488	none	unmapped	N/A	N/A	N/A	N/A
c16056/f1p0/2446	2443	complete	162	0.100069	none	unmapped	N/A	N/A	N/A	N/A
c16062/f1p0/3767	3754	complete	195	0.391103	Motif:(TTTTATT)n	unmapped	N/A	N/A	N/A	N/A
c16074/f1p0/1320	1321	complete	183	1.33376	none	unmapped	N/A	N/A	N/A	N/A
c16141/f1p0/2359	2362	complete	198	0.241451	none	unmapped	N/A	N/A	N/A	N/A
c16179/f1p0/2279	2252	complete	189	0.219372	none	unmapped	N/A	N/A	N/A	N/A
c16346/f1p0/1480	1480	complete	198	0.219226	Motif:(CCCCG)n,Motif:(CGC)n	unmapped	N/A	N/A	N/A	N/A
c16392/f1p0/1267	1267	complete	231	4.61189	none	unmapped	N/A	N/A	N/A	N/A
c16425/f1p1/1335	1341	complete	183	0.802428	none	unmapped	N/A	N/A	N/A	N/A
c16435/f1p0/4015	3856	complete	21	0.0577217	none	unmapped	N/A	N/A	N/A	N/A
c16437/f1p0/1706	1706	complete	93	3.55496	none	unmapped	N/A	N/A	N/A	N/A
c16540/f1p0/2219	2345	complete	132	0.0125844	Motif:RTE-1_SBi,Motif:RTE2_ZM,Motif:STOWAWAY1_SB	unmapped	N/A	N/A	N/A	N/A
c16552/f1p0/3624	3650	complete	252	0.161224	Motif:MuDR-N8_SBi,Motif:MuDR-N9_SBi	unmapped	N/A	N/A	N/A	N/A
c16608/f1p0/2735	2734	complete	252	1.87143	Motif:(CTCCT)n,Motif:(AGC)n	unmapped	N/A	N/A	N/A	N/A
c16733/f1p0/1505	1503	complete	189	0.163838	Motif:(CT)n	unmapped	N/A	N/A	N/A	N/A
c16779/f1p1/2467	2446	complete	186	1.24755	none	unmapped	N/A	N/A	N/A	N/A
c16840/f1p0/1432	1440	complete	93	0.258931	none	unmapped	N/A	N/A	N/A	N/A
c16896/f1p3/1412	1412	complete	294	3.94066	Motif:G-rich	unmapped	N/A	N/A	N/A	N/A
c16981/f1p0/2401	2401	complete	186	0.0134702	Motif:EnSpm-N21_SBi,Motif:Gypsy-140_SBi-I	unmapped	N/A	N/A	N/A	N/A
c1700/f3p7/2383	2383	complete	183	0	Motif:(CTCTC)n	unmapped	N/A	N/A	N/A	N/A
c17033/f1p0/4773	4726	complete	207	0.107268	Motif:GA-rich,Motif:(GCA)n,Motif:STOWAWAY15_SB,Motif:Copia-134_SB-LTR	unmapped	N/A	N/A	N/A	N/A
c17056/f2p0/2646	2666	complete	153	2.64818	Motif:(TC)n,Motif:(TCC)n	unmapped	N/A	N/A	N/A	N/A
c17067/f1p0/1183	1183	complete	261	6.94946	Motif:(TCCCTCT)n	unmapped	N/A	N/A	N/A	N/A
c17092/f1p0/4367	4443	complete	198	0.0486615	Motif:MuDR-N8_SBi,Motif:MuDR-N9_SBi	unmapped	N/A	N/A	N/A	N/A
c17154/f1p0/1536	1471	complete	177	1.40107	Motif:(TCG)n,Motif:(TCGCCG)n,Motif:(T)n,Motif:NonLTR-1_SBi	unmapped	N/A	N/A	N/A	N/A
c17156/f1p0/6430	6429	complete	123	0	Motif:DNA-11N_SBi,Motif:Copia-141_SB-LTR,Motif:RLG_scMaximus_2_2-LTR	unmapped	N/A	N/A	N/A	N/A
c17228/f1p2/7275	7277	complete	222	0.393192	Motif:(T)n	unmapped	N/A	N/A	N/A	N/A
c17265/f1p0/4195	4206	complete	228	0.981556	Motif:Helitron-5_SBi,Motif:(G)n,Motif:Helitron-N2_SBi,Motif:(C)n	unmapped	N/A	N/A	N/A	N/A
c17287/f1p0/1945	1936	complete	129	2.36059	none	unmapped	N/A	N/A	N/A	N/A
c17351/f1p1/2288	2292	complete	141	1.09052	Motif:(TC)n	unmapped	N/A	N/A	N/A	N/A
c1737/f2p0/5274	5284	complete	270	0.145289	Motif:HARB-5_SBi,Motif:STOWAWAY1_SB,Motif:RLG_scTat_6_1-LTR,Motif:RLG_scTat_6_1-I	unmapped	N/A	N/A	N/A	N/A
c17388/f1p0/4087	4015	complete	159	0.130613	Motif:(TCTC)n	unmapped	N/A	N/A	N/A	N/A
c17396/f1p2/4201	4202	complete	252	0.663376	Motif:(T)n	unmapped	N/A	N/A	N/A	N/A
c17422/f1p0/1494	1553	complete	231	1.64442	none	unmapped	N/A	N/A	N/A	N/A
c17447/f1p0/2335	2334	complete	186	0.0728029	none	unmapped	N/A	N/A	N/A	N/A
c17465/f1p0/1356	1367	complete	258	1.31636	none	unmapped	N/A	N/A	N/A	N/A
c17491/f1p0/3469	3198	complete	198	0.356681	Motif:(A)n	unmapped	N/A	N/A	N/A	N/A
c17531/f1p0/1443	1443	complete	231	1.25259	Motif:(AGGG)n	unmapped	N/A	N/A	N/A	N/A
c17591/f1p0/1426	1420	complete	288	0.870823	none	unmapped	N/A	N/A	N/A	N/A
c17611/f1p0/6002	5968	complete	240	0.104576	Motif:EnSpm1_SB	unmapped	N/A	N/A	N/A	N/A
c17628/f1p0/1345	1342	complete	213	3.13541	none	unmapped	N/A	N/A	N/A	N/A
c17689/f1p0/2721	2721	complete	225	2.10622	none	unmapped	N/A	N/A	N/A	N/A
c17690/f1p0/5599	5610	complete	153	0	none	unmapped	N/A	N/A	N/A	N/A
c17703/f1p0/4164	4167	complete	78	0.851043	Motif:Gypsy-N129_SBi-LTR,Motif:RLG_scTat_4_1-I,Motif:(AGGATTA)n	unmapped	N/A	N/A	N/A	N/A
c17709/f1p0/1226	1226	complete	210	5.00051	Motif:MuDR-N9_SBi,Motif:MuDR-N8_SBi	unmapped	N/A	N/A	N/A	N/A
c17730/f1p0/2641	2644	complete	228	0.19189	none	unmapped	N/A	N/A	N/A	N/A
c17753/f1p0/3237	3242	complete	177	0.844553	none	unmapped	N/A	N/A	N/A	N/A
c17784/f1p1/2778	2779	complete	231	0.788744	Motif:Gypsy-92_SB-LTR,Motif:RLG_scDEL_2_2-LTR	unmapped	N/A	N/A	N/A	N/A
c17795/f1p1/2479	2451	complete	201	1.26138	none	unmapped	N/A	N/A	N/A	N/A
c17883/f1p0/2596	2591	complete	174	1.11891	Motif:Helitron-5_SBi	unmapped	N/A	N/A	N/A	N/A
c17891/f1p0/2262	2260	complete	135	0.769754	none	unmapped	N/A	N/A	N/A	N/A
c17971/f1p4/2336	2337	complete	171	7.17662	none	unmapped	N/A	N/A	N/A	N/A
c18073/f1p0/5841	5536	complete	183	0.0856043	Motif:(CGCGGC)n,Motif:RLG_scDEL_1_1-LTR,Motif:RLG_scDEL_1_2-LTR	unmapped	N/A	N/A	N/A	N/A
c18083/f1p0/3542	3531	complete	75	0.37319	Motif:(CTCT)n,Motif:RLG_scTat_4_1-I,Motif:BAGY1_HV_LTR,Motif:Gypsy-93_ZM-LTR	unmapped	N/A	N/A	N/A	N/A
c18105/f2p0/2509	2512	complete	228	0.484475	none	unmapped	N/A	N/A	N/A	N/A
c18163/f1p0/1590	1589	complete	141	0.846487	Motif:LINE1-5_ZM,Motif:(TTTCCT)n	unmapped	N/A	N/A	N/A	N/A
c18185/f1p0/2239	2239	complete	159	2.07852	Motif:Helitron-N13_SBi	unmapped	N/A	N/A	N/A	N/A
c18221/f1p0/6820	6822	complete	246	0	Motif:(ATG)n,Motif:(TGATAA)n,Motif:(AATAAT)n	unmapped	N/A	N/A	N/A	N/A
c18254/f1p0/2272	2274	complete	123	0.0354136	Motif:(CATG)n,Motif:RLG_scTat_2_1-I	unmapped	N/A	N/A	N/A	N/A
c18258/f1p0/1875	1873	complete	198	0.124973	none	unmapped	N/A	N/A	N/A	N/A
c18267/f1p0/2157	2157	complete	276	0	none	unmapped	N/A	N/A	N/A	N/A
c18287/f1p0/3974	3894	complete	96	0	Motif:(TTC)n,Motif:STOWAWAY12_SB,Motif:STOWAWAY13_SB	unmapped	N/A	N/A	N/A	N/A
c18289/f1p0/7204	7189	complete	141	0	Motif:Gypsy-42_SB-I,Motif:Gypsy-89_ZM-I,Motif:Gypsy-49_SB-I	unmapped	N/A	N/A	N/A	N/A
c18341/f1p1/1220	1220	complete	228	1.85827	none	unmapped	N/A	N/A	N/A	N/A
c18355/f1p0/4192	3881	complete	267	0.0708703	Motif:(T)n	unmapped	N/A	N/A	N/A	N/A
c18382/f1p0/2044	2134	complete	231	0.558407	Motif:(A)n	unmapped	N/A	N/A	N/A	N/A
c18432/f1p1/3889	3900	complete	189	1.11247	Motif:RLG_scTat_2_1-I,Motif:(CCTCTGC)n,Motif:(CTCCG)n	unmapped	N/A	N/A	N/A	N/A
c18655/f1p0/3143	3037	complete	192	0.0242063	Motif:TSB1B,Motif:EnSpm-16_SBi,Motif:DNA-10N_SBi,Motif:TSB2	unmapped	N/A	N/A	N/A	N/A
c18719/f1p0/1182	1182	complete	291	2.68004	Motif:(ACGCCGC)n	unmapped	N/A	N/A	N/A	N/A
c18807/f1p1/2542	2507	complete	285	0.727685	none	unmapped	N/A	N/A	N/A	N/A
c18845/f1p1/2328	2327	complete	234	0.0277118	Motif:DNA-8-1N_SBi	unmapped	N/A	N/A	N/A	N/A
c18982/f1p0/1192	1189	complete	150	0.440243	Motif:EnSpm-N4_SBi	unmapped	N/A	N/A	N/A	N/A
c19025/f1p0/1809	1801	complete	171	1.06109	none	unmapped	N/A	N/A	N/A	N/A
c19061/f1p0/11142	11123	complete	177	0	Motif:G-rich,Motif:(GGCGGA)n	unmapped	N/A	N/A	N/A	N/A
c19113/f1p0/1429	1430	complete	78	0.0286667	Motif:Gypsy-129_SBi-LTR,Motif:Gypsy-139_SBi-LTR,Motif:RLG_scDEL_6_1-LTR	unmapped	N/A	N/A	N/A	N/A
c19115/f1p0/1074	1076	complete	144	3.87445	Motif:(TCCTC)n	unmapped	N/A	N/A	N/A	N/A
c19204/f1p0/3613	3611	complete	192	0.156569	none	unmapped	N/A	N/A	N/A	N/A
c19249/f1p0/2269	2272	complete	228	0.522811	none	unmapped	N/A	N/A	N/A	N/A
c19253/f1p0/1189	1187	complete	42	0.237453	Motif:(TCCC)n,Motif:(CA)n,Motif:A-rich	unmapped	N/A	N/A	N/A	N/A
c19290/f1p0/2811	2811	complete	96	0	none	unmapped	N/A	N/A	N/A	N/A
c19304/f1p0/2523	2532	complete	153	0.340729	none	unmapped	N/A	N/A	N/A	N/A
c19310/f1p0/1354	1354	complete	81	0.327118	Motif:(CAA)n	unmapped	N/A	N/A	N/A	N/A
c19333/f2p0/2472	2472	complete	288	0.450193	none	unmapped	N/A	N/A	N/A	N/A
c19376/f1p0/2837	2844	complete	207	2.3282	Motif:(CT)n,Motif:(GGC)n,Motif:(TAT)n	unmapped	N/A	N/A	N/A	N/A
c19383/f2p1/2349	2343	complete	198	2.04008	none	unmapped	N/A	N/A	N/A	N/A
c19417/f1p2/2625	2627	complete	183	4.17631	Motif:(CTCTC)n	unmapped	N/A	N/A	N/A	N/A
c19553/f1p0/1180	1183	complete	150	0.556455	none	unmapped	N/A	N/A	N/A	N/A
c19660/f1p0/2472	2480	complete	183	0.292949	Motif:EnSpm-N21_SBi	unmapped	N/A	N/A	N/A	N/A
c19885/f1p0/2466	2458	complete	96	0.209501	Motif:(CCGTCG)n,Motif:(CCTCCC)n,Motif:Helitron-N16_SBi,Motif:(TTTCT)n	unmapped	N/A	N/A	N/A	N/A
c19911/f1p0/1776	1774	complete	153	0.952308	none	unmapped	N/A	N/A	N/A	N/A
c19946/f1p0/3496	3529	complete	147	0.0728928	Motif:(CT)n	unmapped	N/A	N/A	N/A	N/A
c19963/f1p1/2443	2444	complete	252	0.966789	none	unmapped	N/A	N/A	N/A	N/A
c20040/f1p0/2362	2362	complete	285	0.775773	none	unmapped	N/A	N/A	N/A	N/A
c20055/f1p0/5733	5724	complete	285	0	Motif:(T)n	unmapped	N/A	N/A	N/A	N/A
c20077/f1p0/1886	1887	complete	276	0	Motif:MuDR-N8_SBi	unmapped	N/A	N/A	N/A	N/A
c20168/f1p0/1074	1075	complete	291	2.54823	none	unmapped	N/A	N/A	N/A	N/A
c20209/f1p0/3882	3854	complete	219	0.0403964	Motif:(AT)n,Motif:EnSpm-N39_SBi	unmapped	N/A	N/A	N/A	N/A
c20214/f1p0/1132	1135	complete	285	1.42297	Motif:(CGC)n	unmapped	N/A	N/A	N/A	N/A
c20245/f1p0/1422	1423	complete	135	0.354498	Motif:(CCTC)n	unmapped	N/A	N/A	N/A	N/A
c20299/f1p0/1913	1946	complete	198	0.102882	Motif:(CTTCAT)n	unmapped	N/A	N/A	N/A	N/A
c20391/f1p0/2067	2047	complete	72	0	Motif:(AG)n,Motif:(A)n	unmapped	N/A	N/A	N/A	N/A
c20428/f1p1/1818	1827	complete	282	2.28264	Motif:Copia-45_SB-I,Motif:(GTG)n,Motif:EnSpm-13_ZM	unmapped	N/A	N/A	N/A	N/A
c20511/f1p0/1237	1238	complete	204	0.54124	Motif:LINE1-59_SBi	unmapped	N/A	N/A	N/A	N/A
c20541/f1p0/2496	2497	complete	213	1.21227	Motif:(CCGCCC)n	unmapped	N/A	N/A	N/A	N/A
c20571/f1p0/2465	2453	complete	285	0.0715347	Motif:(GCGGCG)n,Motif:(CCT)n,Motif:(TCCCTT)n	unmapped	N/A	N/A	N/A	N/A
c20590/f1p0/2703	2701	complete	156	0.140826	Motif:(TA)n,Motif:HARB-N6_ZM,Motif:(GGCGCA)n,Motif:HARB-7_SBi,Motif:Helitron-N11_SBi	unmapped	N/A	N/A	N/A	N/A
c20690/f1p0/2323	2335	complete	114	0.311588	Motif:Helitron-N10_SBi,Motif:TSB1	unmapped	N/A	N/A	N/A	N/A
c20819/f1p0/1255	1269	complete	162	0.867955	none	unmapped	N/A	N/A	N/A	N/A
c20825/f1p0/2641	2641	complete	189	2.85907	none	unmapped	N/A	N/A	N/A	N/A
c20931/f1p0/2778	2774	complete	204	0.605073	none	unmapped	N/A	N/A	N/A	N/A
c20983/f1p2/1275	1275	complete	192	1.49376	Motif:(CCT)n	unmapped	N/A	N/A	N/A	N/A
c21011/f1p0/1233	1234	complete	141	0.571921	Motif:EnSpm-44_SBi	unmapped	N/A	N/A	N/A	N/A
c21016/f1p0/3348	3313	complete	261	0.586164	Motif:(GTTTAG)n	unmapped	N/A	N/A	N/A	N/A
c21076/f1p0/2264	2266	complete	219	0.527223	none	unmapped	N/A	N/A	N/A	N/A
c21105/f1p0/2394	2375	complete	297	0.0633046	Motif:(CT)n	unmapped	N/A	N/A	N/A	N/A
c21113/f1p0/5048	5000	complete	234	0	Motif:Gypsy-125N_SBi-LTR	unmapped	N/A	N/A	N/A	N/A
c21157/f1p0/2458	2458	complete	294	0	none	unmapped	N/A	N/A	N/A	N/A
c21197/f1p0/2790	2716	complete	225	1.9671	Motif:(CT)n,Motif:EnSpm-N1_SBi	unmapped	N/A	N/A	N/A	N/A
c21282/f1p0/1277	1259	complete	249	0.89864	none	unmapped	N/A	N/A	N/A	N/A
c21316/f1p0/8864	8864	complete	201	0	Motif:A-rich	unmapped	N/A	N/A	N/A	N/A
c21364/f1p2/2554	2553	complete	252	0.802484	none	unmapped	N/A	N/A	N/A	N/A
c21530/f1p0/1247	1247	complete	39	0	none	unmapped	N/A	N/A	N/A	N/A
c21598/f1p0/2632	2629	complete	270	1.72142	none	unmapped	N/A	N/A	N/A	N/A
c21650/f1p0/1108	1111	complete	126	2.4089	none	unmapped	N/A	N/A	N/A	N/A
c21774/f1p0/1240	1240	complete	93	0.85562	none	unmapped	N/A	N/A	N/A	N/A
c2180/f2p0/2362	2362	complete	141	2.90581	none	unmapped	N/A	N/A	N/A	N/A
c21801/f1p0/3700	3709	complete	162	0.145856	none	unmapped	N/A	N/A	N/A	N/A
c21840/f1p0/1063	1063	complete	78	0	Motif:LINE1-47_SBi	mapped	intergenic	Chr02	72311027	72308092
c21858/f1p0/3580	3582	complete	180	0.23262	none	unmapped	N/A	N/A	N/A	N/A
c21912/f1p0/1311	1311	complete	126	0.0921403	none	unmapped	N/A	N/A	N/A	N/A
c21927/f1p0/3682	3752	complete	189	0.880304	Motif:EnSpm-38_SBi,Motif:EnSpm-10_ZM	unmapped	N/A	N/A	N/A	N/A
c2198/f1p0/6056	6041	complete	267	0.242717	Motif:(TAGTGC)n	unmapped	N/A	N/A	N/A	N/A
c22015/f1p0/2374	2376	complete	207	0.940962	none	unmapped	N/A	N/A	N/A	N/A
c22100/f1p1/2759	2761	complete	153	1.26619	none	unmapped	N/A	N/A	N/A	N/A
c22104/f1p1/1331	1331	complete	210	0.504066	none	unmapped	N/A	N/A	N/A	N/A
c22135/f1p0/1232	1227	complete	132	2.44692	Motif:(TC)n,Motif:(CT)n	unmapped	N/A	N/A	N/A	N/A
c22289/f1p0/1688	1690	complete	204	0.131474	none	unmapped	N/A	N/A	N/A	N/A
c22292/f1p0/918	919	complete	162	1.74759	none	unmapped	N/A	N/A	N/A	N/A
c22307/f1p1/3498	3501	complete	147	0.498433	Motif:(CACAG)n,Motif:Gypsy-125N_SBi-LTR	unmapped	N/A	N/A	N/A	N/A
c2231/f2p0/4129	4133	complete	180	1.3305	none	unmapped	N/A	N/A	N/A	N/A
c22328/f1p0/3059	3043	complete	198	0.49228	Motif:A-rich,Motif:(CTCCT)n,Motif:(CTCG)n	unmapped	N/A	N/A	N/A	N/A
c22352/f1p0/7224	7315	complete	216	0.0351245	Motif:(T)n,Motif:Tourist1a_SB,Motif:EnSpm-N39_SBi,Motif:hAT-N18_SBi	unmapped	N/A	N/A	N/A	N/A
c22353/f1p0/3173	3191	complete	120	3.33178	Motif:(CCTCTC)n,Motif:(GCCCC)n,Motif:(CTCTC)n	unmapped	N/A	N/A	N/A	N/A
c22440/f1p0/2373	2358	complete	171	2.38054	Motif:(GCCGCT)n,Motif:RLG_scDEL_6_1-LTR	unmapped	N/A	N/A	N/A	N/A
c22519/f1p0/1635	1584	complete	201	1.35423	Motif:(ATTTGCA)n	unmapped	N/A	N/A	N/A	N/A
c22682/f1p0/2668	2671	complete	291	0.187543	Motif:EnSpm1_SB,Motif:(A)n	unmapped	N/A	N/A	N/A	N/A
c22715/f1p1/1412	1411	complete	105	1.22676	none	unmapped	N/A	N/A	N/A	N/A
c22792/f1p0/1207	1206	complete	195	0.274212	none	unmapped	N/A	N/A	N/A	N/A
c22839/f1p0/1205	1205	complete	216	1.11562	Motif:(CACACA)n	unmapped	N/A	N/A	N/A	N/A
c22856/f1p0/2668	2661	complete	108	0.602728	Motif:(GGC)n,Motif:A-rich,Motif:GA-rich,Motif:Gypsy-126_SBi-I	unmapped	N/A	N/A	N/A	N/A
c22895/f1p0/2442	2447	complete	294	0.696479	none	unmapped	N/A	N/A	N/A	N/A
c22918/f1p0/3673	3662	complete	294	0.0660745	Motif:EnSpm-N3_TA	unmapped	N/A	N/A	N/A	N/A
c23006/f2p1/2486	2487	complete	189	1.17499	Motif:MuDR-N8_SBi,Motif:RTE-1_BDi,Motif:MuDR-N9_SBi	unmapped	N/A	N/A	N/A	N/A
c23016/f1p0/4864	4864	complete	144	0	Motif:Gypsy-177_ZM-I	unmapped	N/A	N/A	N/A	N/A
c23043/f1p0/8717	8718	complete	147	0	Motif:(TTTTC)n,Motif:(A)n	unmapped	N/A	N/A	N/A	N/A
c23044/f1p0/3677	3670	complete	213	0	Motif:(T)n,Motif:(A)n	unmapped	N/A	N/A	N/A	N/A
c23096/f1p0/1027	1037	complete	153	2.9062	none	unmapped	N/A	N/A	N/A	N/A
c23131/f1p0/1978	2113	complete	156	1.38156	Motif:(CCT)n	unmapped	N/A	N/A	N/A	N/A
c23180/f1p0/3048	3028	complete	165	0.0132977	none	unmapped	N/A	N/A	N/A	N/A
c23209/f1p1/1631	1623	complete	279	4.27225	none	unmapped	N/A	N/A	N/A	N/A
c23238/f1p1/3689	3678	complete	273	0.478865	none	unmapped	N/A	N/A	N/A	N/A
c23251/f1p0/4796	4766	complete	165	0.0153457	Motif:RLG_scDEL_1_5-LTR,Motif:RLG_scDEL_1_1-LTR,Motif:RLG_scDEL_1_2-LTR	unmapped	N/A	N/A	N/A	N/A
c23269/f1p0/1826	1883	complete	180	0.130904	Motif:(CCACCG)n	unmapped	N/A	N/A	N/A	N/A
c23291/f1p0/1243	1253	complete	105	0.175622	none	unmapped	N/A	N/A	N/A	N/A
c23311/f1p0/3285	3463	complete	273	0.316795	Motif:(CCT)n	unmapped	N/A	N/A	N/A	N/A
c23392/f1p0/2488	2415	complete	285	0.209118	none	unmapped	N/A	N/A	N/A	N/A
c23413/f1p0/1108	1109	complete	222	0.405319	Motif:(CGGCGC)n,Motif:(CTC)n	unmapped	N/A	N/A	N/A	N/A
c23506/f1p0/3415	3414	complete	210	0.0825592	Motif:(ATTTGTT)n	unmapped	N/A	N/A	N/A	N/A
c23572/f1p0/3893	3891	complete	273	1.26799	Motif:(GCCTC)n,Motif:(CCCTCT)n	unmapped	N/A	N/A	N/A	N/A
c23664/f1p1/3454	3447	complete	171	1.23888	Motif:(CGCACA)n,Motif:Gypsy67-ZM_LTR,Motif:hAT-N15_ZM,Motif:Gypsy-125N_SBi-LTR	unmapped	N/A	N/A	N/A	N/A
c23709/f1p0/3339	3351	complete	198	0.100151	Motif:(TTCTATT)n	unmapped	N/A	N/A	N/A	N/A
c23729/f1p0/3566	3599	complete	285	0.409945	none	unmapped	N/A	N/A	N/A	N/A
c23745/f1p0/2586	2590	complete	171	0.304688	Motif:EnSpm-N16_SBi	unmapped	N/A	N/A	N/A	N/A
c23753/f1p0/3332	3476	complete	99	0.256704	Motif:MuDR-13_SBi	unmapped	N/A	N/A	N/A	N/A
c23883/f1p1/2443	2452	complete	141	2.29022	none	unmapped	N/A	N/A	N/A	N/A
c24134/f1p0/3404	3383	complete	255	0.227638	Motif:MuDR-N8_SBi	unmapped	N/A	N/A	N/A	N/A
c24138/f1p0/2457	2453	complete	162	0.320141	Motif:Gypsy-N129_SBi-LTR,Motif:Gypsy-124N_SBi-LTR	unmapped	N/A	N/A	N/A	N/A
c24216/f1p0/2110	2103	complete	138	0.149564	Motif:(GAC)n	unmapped	N/A	N/A	N/A	N/A
c24235/f1p1/2225	2229	complete	165	0.189886	none	unmapped	N/A	N/A	N/A	N/A
c24306/f1p0/2358	2359	complete	258	0.597834	Motif:(CCCTCT)n	unmapped	N/A	N/A	N/A	N/A
c24462/f1p0/2956	2965	complete	138	0.358308	none	unmapped	N/A	N/A	N/A	N/A
c24512/f1p0/2749	2782	complete	204	0.481362	none	unmapped	N/A	N/A	N/A	N/A
c24560/f1p0/2447	2443	complete	165	0.0130587	Motif:RLG_scDEL_1_2-LTR	unmapped	N/A	N/A	N/A	N/A
c24615/f1p0/2633	2626	complete	126	1.90133	Motif:Gypsy-25_SB-I,Motif:STOWAWAY1_SB	unmapped	N/A	N/A	N/A	N/A
c24770/f1p0/3421	3424	complete	267	0.388655	Motif:(GCC)n,Motif:LINE1-6_SBi	unmapped	N/A	N/A	N/A	N/A
c2485/f1p0/4285	4285	complete	240	1.48702	Motif:(GGC)n	unmapped	N/A	N/A	N/A	N/A
c24947/f1p0/1710	1723	complete	153	0	Motif:MuDR-N4_SBi,Motif:Gypsy-133_SBi-LTR	unmapped	N/A	N/A	N/A	N/A
c24955/f1p0/4081	4005	complete	240	0.508886	Motif:(GGC)n	unmapped	N/A	N/A	N/A	N/A
c24991/f1p1/3435	3435	complete	267	5.43304	Motif:Gypsy-125N_SBi-LTR	unmapped	N/A	N/A	N/A	N/A
c25078/f1p0/3316	3324	complete	213	4.02059	Motif:(CCGCCC)n,Motif:(CT)n,Motif:(CTCTC)n	unmapped	N/A	N/A	N/A	N/A
c25143/f1p0/1171	1184	complete	189	4.39682	none	unmapped	N/A	N/A	N/A	N/A
c25227/f1p0/1117	1115	complete	225	2.15319	none	unmapped	N/A	N/A	N/A	N/A
c25257/f1p0/1167	1167	complete	126	1.13135	Motif:(GCT)n,Motif:GYPSOR1_LTR	unmapped	N/A	N/A	N/A	N/A
c2530/f1p0/2289	2326	complete	126	0.615152	none	unmapped	N/A	N/A	N/A	N/A
c25409/f1p0/2053	2050	complete	66	0.0196417	none	unmapped	N/A	N/A	N/A	N/A
c25467/f1p1/1165	1168	complete	159	0.794961	Motif:(CCT)n,Motif:(C)n	unmapped	N/A	N/A	N/A	N/A
c25518/f1p0/1636	1636	complete	174	2.27056	Motif:(GCC)n	unmapped	N/A	N/A	N/A	N/A
c25534/f1p0/1198	1200	complete	243	1.04981	Motif:G-rich	unmapped	N/A	N/A	N/A	N/A
c25694/f1p0/1218	1217	complete	189	2.7792	Motif:RLG_scDEL_2_2-LTR	unmapped	N/A	N/A	N/A	N/A
c25713/f1p0/1050	1094	complete	273	2.53853	Motif:RLG_scTat_2_1-I	unmapped	N/A	N/A	N/A	N/A
c25757/f2p0/3553	3567	complete	261	0	Motif:Gypsy-125N_SBi-LTR	unmapped	N/A	N/A	N/A	N/A
c25764/f1p0/3793	3795	complete	195	0.164825	Motif:(TCTTT)n	unmapped	N/A	N/A	N/A	N/A
c25775/f1p0/1112	1108	complete	291	6.09566	Motif:(AG)n,Motif:G-rich,Motif:(ATAT)n	unmapped	N/A	N/A	N/A	N/A
c2582/f2p0/1770	1769	complete	183	0.942298	Motif:RLG_scTat_2_1-I	unmapped	N/A	N/A	N/A	N/A
c25961/f1p0/5716	5715	complete	189	0	none	unmapped	N/A	N/A	N/A	N/A
c25964/f1p0/1311	1310	complete	141	0.30282	none	unmapped	N/A	N/A	N/A	N/A
c26022/f1p0/1773	1807	complete	60	0.179174	Motif:Gypsy-12_SB-LTR	unmapped	N/A	N/A	N/A	N/A
c26058/f1p2/3726	3722	complete	222	2.48815	Motif:(CCT)n,Motif:(CCCCTC)n	unmapped	N/A	N/A	N/A	N/A
c26161/f1p2/1603	1600	complete	267	29.5897	Motif:(GCCGTC)n	unmapped	N/A	N/A	N/A	N/A
c26180/f1p2/3565	3565	complete	267	0	Motif:LINE1-6_SBi	unmapped	N/A	N/A	N/A	N/A
c26255/f1p1/3687	3693	complete	147	2.35173	Motif:(CACAG)n,Motif:Gypsy-125N_SBi-LTR	unmapped	N/A	N/A	N/A	N/A
c26310/f1p0/4408	4255	complete	201	0	Motif:(A)n	unmapped	N/A	N/A	N/A	N/A
c2633/f1p0/1110	1110	complete	216	2.52112	none	unmapped	N/A	N/A	N/A	N/A
c26396/f1p0/1101	1101	complete	195	1.69606	none	unmapped	N/A	N/A	N/A	N/A
c26532/f1p1/1281	1285	complete	153	0	Motif:ATHILA-4_SBi-I,Motif:Gypsy-120_SB-I,Motif:RLG_scTat_2_1-I,Motif:Gypsy-132_SBi-LTR,Motif:Gypsy-136_SBi-LTR	unmapped	N/A	N/A	N/A	N/A
c26614/f1p0/1507	1548	complete	267	0.55924	Motif:(CCCCCCT)n	unmapped	N/A	N/A	N/A	N/A
c26722/f1p0/1132	1133	complete	138	1.93686	none	unmapped	N/A	N/A	N/A	N/A
c26851/f1p0/1992	1907	complete	162	1.08569	Motif:(T)n,Motif:Mariner-4_SBi	unmapped	N/A	N/A	N/A	N/A
c26858/f1p0/1224	1225	complete	81	0.320339	Motif:(TTGCT)n	unmapped	N/A	N/A	N/A	N/A
c26860/f1p0/2375	2375	complete	126	0	none	unmapped	N/A	N/A	N/A	N/A
c26909/f1p0/2204	2205	complete	228	0.957413	none	unmapped	N/A	N/A	N/A	N/A
c26927/f1p0/2363	2439	complete	207	0.364156	none	unmapped	N/A	N/A	N/A	N/A
c26957/f1p0/1215	1291	complete	132	0.158013	Motif:(CTCCCT)n,Motif:(CGG)n	unmapped	N/A	N/A	N/A	N/A
c26986/f1p0/1063	1063	complete	156	1.89336	Motif:(ATTT)n,Motif:Helitron-N2_SBi	unmapped	N/A	N/A	N/A	N/A
c26990/f1p0/2217	2198	complete	90	2.19931	Motif:(CGCCTC)n,Motif:(TG)n,Motif:(T)n	unmapped	N/A	N/A	N/A	N/A
c26993/f1p0/2097	2097	complete	192	0	none	unmapped	N/A	N/A	N/A	N/A
c27042/f1p0/1786	1777	complete	126	1.5084	none	unmapped	N/A	N/A	N/A	N/A
c2708/f1p0/1495	1499	complete	291	0.530743	Motif:(A)n	unmapped	N/A	N/A	N/A	N/A
c27096/f1p0/2403	2403	complete	201	0.264735	Motif:Copia-69_SB-LTR,Motif:(TTCTG)n,Motif:Gypsy-176_ZM-LTR,Motif:MuDR-4_SBi,Motif:Gypsy-N129_SBi-LTR	unmapped	N/A	N/A	N/A	N/A
c27099/f1p0/2160	2162	complete	102	0.270049	Motif:(TTTAGT)n	unmapped	N/A	N/A	N/A	N/A
c27163/f1p0/2285	2285	complete	177	0.461605	Motif:MuDR-N9_SBi,Motif:SINE2-1_ZM,Motif:MuDR-N8_SBi	unmapped	N/A	N/A	N/A	N/A
c27210/f1p1/2796	2799	complete	210	0.167684	Motif:(GAT)n,Motif:Gypsy-169_ZM-LTR	unmapped	N/A	N/A	N/A	N/A
c27280/f1p0/2250	2249	complete	195	0.268555	none	unmapped	N/A	N/A	N/A	N/A
c27313/f1p1/812	816	complete	228	2.96068	none	unmapped	N/A	N/A	N/A	N/A
c27444/f1p0/2485	2485	complete	228	0.772854	none	unmapped	N/A	N/A	N/A	N/A
c27467/f1p0/1415	1419	complete	162	1.89908	none	unmapped	N/A	N/A	N/A	N/A
c27471/f1p0/2702	2698	complete	171	0.926688	Motif:EnSpm-30_SBi	unmapped	N/A	N/A	N/A	N/A
c27571/f1p0/3174	3174	complete	267	0	none	unmapped	N/A	N/A	N/A	N/A
c27617/f1p0/1411	1412	complete	99	1.80992	Motif:(CCCTCC)n	unmapped	N/A	N/A	N/A	N/A
c27619/f1p0/1438	1437	complete	141	2.39193	none	unmapped	N/A	N/A	N/A	N/A
c27636/f1p0/1128	1130	complete	156	0.731971	Motif:EnSpm-44_SBi	unmapped	N/A	N/A	N/A	N/A
c27637/f1p0/1264	1264	complete	219	1.15057	Motif:MuDR-N8_SBi	unmapped	N/A	N/A	N/A	N/A
c27691/f1p2/1305	1306	complete	168	0.681867	Motif:RLG_scDEL_1_2-LTR	unmapped	N/A	N/A	N/A	N/A
c27772/f1p0/2513	2500	complete	186	0.320325	Motif:(CCCG)n	unmapped	N/A	N/A	N/A	N/A
c27841/f1p0/1277	1277	complete	231	3.63958	none	unmapped	N/A	N/A	N/A	N/A
c27858/f1p0/3656	3656	complete	78	0	none	unmapped	N/A	N/A	N/A	N/A
c27867/f1p0/1964	1820	complete	198	0.0516874	none	unmapped	N/A	N/A	N/A	N/A
c27883/f1p0/3804	3739	complete	243	0.147945	none	unmapped	N/A	N/A	N/A	N/A
c27957/f1p0/1659	1658	complete	213	0.592126	none	unmapped	N/A	N/A	N/A	N/A
c27986/f1p2/992	992	complete	57	2.28679	Motif:EnSpm-22_SBi	unmapped	N/A	N/A	N/A	N/A
c27991/f1p0/1308	1308	complete	195	4.17596	none	unmapped	N/A	N/A	N/A	N/A
c28108/f1p0/4469	4380	complete	201	0	Motif:Gypsy-154_ZM-I	unmapped	N/A	N/A	N/A	N/A
c28118/f1p0/3519	3532	complete	198	0.407479	Motif:(CATGTG)n	unmapped	N/A	N/A	N/A	N/A
c28182/f1p0/2160	2160	complete	213	1.02527	Motif:(TGCA)n	unmapped	N/A	N/A	N/A	N/A
c28184/f1p0/2290	2298	complete	291	1.37121	none	unmapped	N/A	N/A	N/A	N/A
c28197/f1p0/3508	3505	complete	285	0.550309	Motif:(TCTTT)n	unmapped	N/A	N/A	N/A	N/A
c28281/f1p0/1141	1111	complete	45	0.108727	Motif:(A)n,Motif:A-rich	unmapped	N/A	N/A	N/A	N/A
c28368/f1p0/2486	2487	complete	270	0.202379	none	unmapped	N/A	N/A	N/A	N/A
c2840/f1p0/2693	2655	complete	153	0.588434	Motif:Gypsy-11_SB-I	unmapped	N/A	N/A	N/A	N/A
c28419/f1p0/1267	1267	complete	138	0.38136	none	unmapped	N/A	N/A	N/A	N/A
c28459/f1p0/3664	3688	complete	285	0.398018	Motif:(CCG)n	unmapped	N/A	N/A	N/A	N/A
c28613/f1p0/1632	1628	complete	279	0	Motif:(T)n	unmapped	N/A	N/A	N/A	N/A
c2864/f1p0/6807	6807	complete	195	0	none	unmapped	N/A	N/A	N/A	N/A
c28644/f1p0/2516	2511	complete	249	0.950747	Motif:(CT)n,Motif:(CCCTCT)n	unmapped	N/A	N/A	N/A	N/A
c28645/f1p0/1641	1642	complete	105	0.539486	none	unmapped	N/A	N/A	N/A	N/A
c28668/f1p1/1057	1058	complete	276	1.42431	none	unmapped	N/A	N/A	N/A	N/A
c28673/f1p2/3434	3435	complete	216	0.290156	Motif:HARB-N21_SBi,Motif:HARB-N25_SBi,Motif:(TGGC)n	unmapped	N/A	N/A	N/A	N/A
c28753/f1p0/1511	1512	complete	168	0.599186	Motif:RLG_scTat_7_1-LTR,Motif:RLG_scTat_7_1-I	unmapped	N/A	N/A	N/A	N/A
c28765/f1p1/1350	1362	complete	189	1.74867	Motif:(GCCTC)n,Motif:(CCCTCT)n	unmapped	N/A	N/A	N/A	N/A
c28790/f1p0/1438	1442	complete	210	1.42753	Motif:(TC)n,Motif:(CCT)n	unmapped	N/A	N/A	N/A	N/A
c28831/f1p0/4016	3758	complete	165	0.0419258	Motif:(GT)n	unmapped	N/A	N/A	N/A	N/A
c28834/f1p0/1518	1537	complete	126	0.736143	none	unmapped	N/A	N/A	N/A	N/A
c29027/f1p0/2839	2837	complete	183	0	none	unmapped	N/A	N/A	N/A	N/A
c29039/f1p1/1332	1332	complete	207	3.07227	none	unmapped	N/A	N/A	N/A	N/A
c29041/f1p0/2197	2197	complete	168	0	none	unmapped	N/A	N/A	N/A	N/A
c29045/f1p1/1918	1918	complete	288	2.3456	none	unmapped	N/A	N/A	N/A	N/A
c2909/f1p0/3301	3331	complete	174	0.120632	Motif:(TATATTC)n,Motif:(ACAT)n	unmapped	N/A	N/A	N/A	N/A
c29113/f1p0/1236	1234	complete	231	0.38717	none	unmapped	N/A	N/A	N/A	N/A
c29152/f1p1/1226	1226	complete	228	0	none	unmapped	N/A	N/A	N/A	N/A
c29159/f1p1/2339	2344	complete	240	1.10929	Motif:MuDR-N8_SBi	unmapped	N/A	N/A	N/A	N/A
c29267/f1p0/2664	2681	complete	168	0.883282	none	unmapped	N/A	N/A	N/A	N/A
c29317/f1p0/3898	3898	complete	195	0.0103297	Motif:(A)n	unmapped	N/A	N/A	N/A	N/A
c2933/f1p0/1280	1280	complete	105	3.08839	none	unmapped	N/A	N/A	N/A	N/A
c2934/f1p1/3853	3855	complete	261	0.3934	Motif:Gypsy-131_SBi-I,Motif:Gypsy-140_SBi-LTR	unmapped	N/A	N/A	N/A	N/A
c29363/f1p0/2187	2269	complete	138	0.958275	Motif:(TC)n,Motif:EnSpm-N15_SBi,Motif:EnSpm-N17_SBi	unmapped	N/A	N/A	N/A	N/A
c29377/f1p0/2581	2577	complete	180	0.195203	none	unmapped	N/A	N/A	N/A	N/A
c29468/f1p0/1036	1063	complete	276	0.833336	none	unmapped	N/A	N/A	N/A	N/A
c29478/f1p1/3394	3397	complete	285	0.649591	Motif:(CCG)n	unmapped	N/A	N/A	N/A	N/A
c29529/f1p3/3219	3219	complete	183	0	Motif:(CGCCTC)n,Motif:(GCCCC)n,Motif:(CT)n,Motif:(CTCTC)n	unmapped	N/A	N/A	N/A	N/A
c29530/f1p0/1143	1143	complete	117	1.16917	none	unmapped	N/A	N/A	N/A	N/A
c29567/f1p1/1373	1380	complete	183	1.94035	Motif:(AG)n	unmapped	N/A	N/A	N/A	N/A
c29628/f1p0/1301	1303	complete	243	4.29564	Motif:G-rich	unmapped	N/A	N/A	N/A	N/A
c2977/f1p0/2671	2671	complete	204	0.432576	none	unmapped	N/A	N/A	N/A	N/A
c29775/f1p0/3843	3777	complete	282	0.0826874	Motif:RLG_scDEL_2_2-LTR,Motif:RLG_scTat_2_1-I,Motif:ATHILA-2_SBi-LTR	unmapped	N/A	N/A	N/A	N/A
c29822/f1p0/1812	1812	complete	165	1.54563	Motif:(GCGGAG)n	unmapped	N/A	N/A	N/A	N/A
c29844/f1p0/3647	3687	complete	138	0.0603258	Motif:Copia-38-LTR_ZM	unmapped	N/A	N/A	N/A	N/A
c29884/f1p0/4417	4403	complete	264	0	Motif:TSB2,Motif:Tourist1a_SB,Motif:(GCGCTC)n,Motif:LTR-2_SBi,Motif:Gypsy-124N_SBi-LTR	unmapped	N/A	N/A	N/A	N/A
c29924/f1p0/1557	1559	complete	291	3.14236	none	unmapped	N/A	N/A	N/A	N/A
c29940/f2p3/2331	2331	complete	243	5.86752	none	unmapped	N/A	N/A	N/A	N/A
c30059/f1p1/2403	2406	complete	168	0.913525	none	unmapped	N/A	N/A	N/A	N/A
c3006/f1p0/1507	1550	complete	276	5.60447	Motif:LTR-1_SBi	unmapped	N/A	N/A	N/A	N/A
c30138/f1p0/5719	5710	complete	255	0	Motif:(T)n,Motif:(ATTT)n	unmapped	N/A	N/A	N/A	N/A
c30157/f1p0/3615	3615	complete	288	0.0692116	Motif:EnSpm-22_SBi,Motif:RLG_scTat_2_1-I	unmapped	N/A	N/A	N/A	N/A
c30275/f1p0/1558	1587	complete	231	3.06039	Motif:HARB-6_SBi,Motif:(TCCCTA)n	mapped	intergenic	Chr06	58681758	58678009
c3028/f1p0/4510	4492	complete	174	0	Motif:(GCGCGGT)n,Motif:(GGTGGA)n,Motif:(G)n	unmapped	N/A	N/A	N/A	N/A
c30401/f1p1/2605	2586	complete	123	2.87192	Motif:(CCTC)n,Motif:(CT)n	unmapped	N/A	N/A	N/A	N/A
c30433/f1p1/2717	2716	complete	267	0.832013	none	unmapped	N/A	N/A	N/A	N/A
c30494/f1p0/2771	2769	complete	219	1.37417	Motif:(GCGGC)n,Motif:(ACGGC)n	unmapped	N/A	N/A	N/A	N/A
c30556/f1p0/2358	2365	complete	219	0.0170255	none	unmapped	N/A	N/A	N/A	N/A
c30649/f1p2/1406	1405	complete	129	1.71532	Motif:(CCCTCT)n,Motif:HARB-12_SBi	unmapped	N/A	N/A	N/A	N/A
c30762/f1p4/2268	2264	complete	183	0	none	unmapped	N/A	N/A	N/A	N/A
c30801/f1p0/4267	4262	complete	288	0.0661326	Motif:A-rich	unmapped	N/A	N/A	N/A	N/A
c30806/f1p0/1070	1097	complete	180	0.839317	Motif:(CT)n	unmapped	N/A	N/A	N/A	N/A
c30892/f1p0/1244	1251	complete	213	3.46674	Motif:(CGGCCT)n	unmapped	N/A	N/A	N/A	N/A
c30910/f1p0/1923	1920	complete	261	0.448644	Motif:(GGCAC)n,Motif:(GGCAGC)n,Motif:(TGCTG)n	unmapped	N/A	N/A	N/A	N/A
c30937/f1p0/2461	2588	complete	255	0.917949	Motif:EnSpm-N14_SBi	unmapped	N/A	N/A	N/A	N/A
c30952/f1p0/3749	3755	complete	159	0	Motif:(AACC)n,Motif:(GCGG)n	unmapped	N/A	N/A	N/A	N/A
c30952/f1p1/2586	2525	complete	171	0.0909625	Motif:(TTCA)n,Motif:(TC)n,Motif:(ATATT)n	unmapped	N/A	N/A	N/A	N/A
c3103/f1p0/2150	2150	complete	153	0	Motif:RLG_scTat_4_1-I,Motif:PREM1,Motif:(AGGATTA)n	unmapped	N/A	N/A	N/A	N/A
c31038/f2p0/2450	2454	complete	219	0.259564	none	unmapped	N/A	N/A	N/A	N/A
c31088/f1p0/3582	3583	complete	108	0	Motif:HARB-5_SBi,Motif:STOWAWAY1_SB,Motif:RLG_scTat_6_1-LTR,Motif:RLG_scTat_6_1-I	unmapped	N/A	N/A	N/A	N/A
c31172/f1p2/1845	1841	complete	294	21.2514	none	unmapped	N/A	N/A	N/A	N/A
c31207/f1p0/1011	1012	complete	132	1.06318	none	unmapped	N/A	N/A	N/A	N/A
c31262/f1p0/1380	1380	complete	150	0.429035	none	unmapped	N/A	N/A	N/A	N/A
c3127/f1p0/2591	2548	complete	288	0.537717	Motif:RLG_scTat_2_1-I	unmapped	N/A	N/A	N/A	N/A
c31285/f1p1/2895	2893	complete	288	1.42719	Motif:SINE2-1_ZM,Motif:EnSpm8_SB,Motif:STOWAWAY2_SB	unmapped	N/A	N/A	N/A	N/A
c31310/f1p1/1934	1939	complete	243	3.61927	none	unmapped	N/A	N/A	N/A	N/A
c3139/f1p2/1730	1730	complete	213	0	none	unmapped	N/A	N/A	N/A	N/A
c31462/f1p0/5710	5686	complete	177	0.0667242	Motif:(GCC)n	unmapped	N/A	N/A	N/A	N/A
c31591/f1p2/1517	1515	complete	246	2.75975	Motif:(CTCCCT)n	unmapped	N/A	N/A	N/A	N/A
c31634/f1p0/8275	8253	complete	147	0	Motif:A-rich,Motif:(A)n,Motif:(ATTT)n	unmapped	N/A	N/A	N/A	N/A
c31669/f1p0/6506	6506	complete	183	0	none	unmapped	N/A	N/A	N/A	N/A
c3170/f1p2/5634	5639	complete	207	0.488922	Motif:(A)n,Motif:MuDR-N9_SBi,Motif:MuDR-N8_SBi	unmapped	N/A	N/A	N/A	N/A
c31745/f1p0/3090	3355	complete	183	0.210783	Motif:EnSpm-N17_SBi	unmapped	N/A	N/A	N/A	N/A
c31854/f1p3/2681	2681	complete	213	2.21081	Motif:(CTCTC)n	unmapped	N/A	N/A	N/A	N/A
c31933/f1p0/1781	1782	complete	192	2.31611	Motif:(CT)n	unmapped	N/A	N/A	N/A	N/A
c31935/f1p0/1402	1445	complete	258	0.431912	Motif:LINE1-62_SBi	unmapped	N/A	N/A	N/A	N/A
c31993/f1p1/2460	2461	complete	279	1.37501	none	unmapped	N/A	N/A	N/A	N/A
c32048/f1p0/1378	1377	complete	99	0.0477617	Motif:RLG_scTat_2_1-I	unmapped	N/A	N/A	N/A	N/A
c32067/f1p0/3305	3301	complete	177	0.475718	Motif:(TGATT)n	unmapped	N/A	N/A	N/A	N/A
c3217/f1p0/2133	2140	complete	288	0.166296	none	unmapped	N/A	N/A	N/A	N/A
c32201/f1p1/1156	1156	complete	201	2.40332	none	unmapped	N/A	N/A	N/A	N/A
c32232/f1p2/3645	3648	complete	285	0	none	unmapped	N/A	N/A	N/A	N/A
c32307/f1p0/3976	3969	complete	210	0.7566	Motif:(T)n	unmapped	N/A	N/A	N/A	N/A
c32313/f1p1/1728	1730	complete	222	1.98942	none	unmapped	N/A	N/A	N/A	N/A
c32396/f1p1/2221	2221	complete	138	0.747018	none	unmapped	N/A	N/A	N/A	N/A
c32408/f1p0/1184	1189	complete	180	0	none	unmapped	N/A	N/A	N/A	N/A
c32423/f1p0/3787	3785	complete	51	0.35608	Motif:(CCCTCT)n,Motif:Gypsy-6_SB-LTR	unmapped	N/A	N/A	N/A	N/A
c32440/f1p0/678	678	complete	108	4.27596	none	unmapped	N/A	N/A	N/A	N/A
c32447/f1p0/1457	1457	complete	270	2.42933	none	unmapped	N/A	N/A	N/A	N/A
c3253/f1p0/2002	1990	complete	291	0.954205	none	unmapped	N/A	N/A	N/A	N/A
c32553/f1p0/862	856	complete	156	1.35571	none	unmapped	N/A	N/A	N/A	N/A
c32567/f1p0/975	975	complete	207	6.33987	none	unmapped	N/A	N/A	N/A	N/A
c32650/f1p0/1881	1876	complete	120	0	Motif:(A)n	unmapped	N/A	N/A	N/A	N/A
c32687/f1p1/3026	3039	complete	165	1.01098	Motif:STOWAWAY1_SB,Motif:Helitron-2_SBi,Motif:EnSpm-14_ZM,Motif:Helitron-N3_SBi	unmapped	N/A	N/A	N/A	N/A
c32696/f1p1/1154	1152	complete	75	0	Motif:Helitron-5_SBi,Motif:Helitron-N2_SBi	mapped	intergenic	Chr05	6965070	6963930
c32705/f1p0/1432	1448	complete	225	0.136337	none	unmapped	N/A	N/A	N/A	N/A
c32726/f1p0/3512	3507	complete	219	0.0686998	Motif:(CAGCGC)n,Motif:(C)n,Motif:L1-5_SBi	unmapped	N/A	N/A	N/A	N/A
c32732/f1p0/3433	3448	complete	168	0.385904	none	unmapped	N/A	N/A	N/A	N/A
c32798/f1p0/2386	2289	complete	147	0.76697	none	unmapped	N/A	N/A	N/A	N/A
c32802/f1p1/2281	2286	complete	177	0.490357	Motif:Helitron-N9_SBi,Motif:EnSpm-29_SBi	unmapped	N/A	N/A	N/A	N/A
c32854/f1p0/2376	2371	complete	267	0.483217	Motif:(A)n	unmapped	N/A	N/A	N/A	N/A
c32974/f1p0/3417	3421	complete	276	0.320167	Motif:STOWAWAY1_SB	unmapped	N/A	N/A	N/A	N/A
c3301/f1p0/3755	3753	complete	96	0.0160932	Motif:(CTC)n,Motif:RLG_scTat_4_1-I	unmapped	N/A	N/A	N/A	N/A
c33031/f1p0/1184	1186	complete	165	0.339505	Motif:EnSpm-N12_SBi	mapped	intergenic	Chr10	48733830	48732661
c33083/f1p3/2712	2712	complete	213	0	Motif:(CTCTC)n	unmapped	N/A	N/A	N/A	N/A
c33089/f1p0/2383	2370	complete	207	2.72853	none	unmapped	N/A	N/A	N/A	N/A
c3310/f1p1/2806	2798	complete	234	1.38812	none	unmapped	N/A	N/A	N/A	N/A
c33138/f1p0/1221	1221	complete	297	0.115421	Motif:GA-rich	unmapped	N/A	N/A	N/A	N/A
c33140/f1p2/2720	2723	complete	228	0.181605	Motif:GA-rich	unmapped	N/A	N/A	N/A	N/A
c33287/f1p0/3738	3743	complete	261	0.549893	Motif:EnSpm-N21_SBi,Motif:Gypsy-140_SBi-I,Motif:Gypsy-131_SBi-I,Motif:ATHILA-6_SBi-I	unmapped	N/A	N/A	N/A	N/A
c33346/f1p0/3428	3431	complete	270	0.375543	Motif:RTE-1_BDi,Motif:RTE1_ZM,Motif:(TGT)n,Motif:EnSpm-30_SBi	unmapped	N/A	N/A	N/A	N/A
c33412/f1p0/5547	5530	complete	162	0	Motif:(A)n	unmapped	N/A	N/A	N/A	N/A
c33458/f1p0/3491	3491	complete	108	0	none	unmapped	N/A	N/A	N/A	N/A
c33589/f1p0/3491	3478	complete	264	0.113281	none	unmapped	N/A	N/A	N/A	N/A
c33640/f2p0/2542	2539	complete	291	1.21459	none	unmapped	N/A	N/A	N/A	N/A
c33645/f1p0/4071	4091	complete	291	0.462814	Motif:STOWAWAY1_SB	unmapped	N/A	N/A	N/A	N/A
c33659/f1p1/3948	3947	complete	297	0.973514	Motif:(CTCCAC)n	unmapped	N/A	N/A	N/A	N/A
c33664/f1p0/2358	2358	complete	144	1.49687	Motif:(CTTCTC)n,Motif:(TC)n,Motif:EnSpm-22_SBi,Motif:EnSpm1_SB,Motif:Helitron-N14_SBi	unmapped	N/A	N/A	N/A	N/A
c3368/f1p0/3498	3507	complete	252	0.0803698	Motif:EnSpm-N15_SBi,Motif:Helitron-N4_ZM,Motif:REP1_SB	unmapped	N/A	N/A	N/A	N/A
c33711/f1p1/2378	2373	complete	171	0.268641	Motif:SINE2-1_ZM,Motif:EnSpm8_SB,Motif:STOWAWAY2_SB	unmapped	N/A	N/A	N/A	N/A
c33853/f1p2/3315	3321	complete	234	1.13836	none	unmapped	N/A	N/A	N/A	N/A
c33995/f1p0/2315	2228	complete	189	0.398359	Motif:EnSpm1_SB	unmapped	N/A	N/A	N/A	N/A
c34004/f1p0/2929	3187	complete	237	0.140421	Motif:(TATT)n	unmapped	N/A	N/A	N/A	N/A
c34028/f1p0/5257	5232	complete	270	0	Motif:(CCCT)n,Motif:(A)n	unmapped	N/A	N/A	N/A	N/A
c34041/f1p0/2370	2354	complete	132	0	none	unmapped	N/A	N/A	N/A	N/A
c34083/f1p0/3519	3519	complete	291	0.734906	Motif:(GGCCGGC)n	unmapped	N/A	N/A	N/A	N/A
c34084/f1p4/2289	2290	complete	132	1.08167	none	unmapped	N/A	N/A	N/A	N/A
c3414/f1p1/2784	2756	complete	210	1.11176	Motif:MuDR-N8_SBi	unmapped	N/A	N/A	N/A	N/A
c34373/f1p0/11194	11190	complete	252	0	Motif:(T)n,Motif:(GTG)n,Motif:(TCTTCC)n,Motif:(TTCCTTT)n,Motif:(AATTTCA)n,Motif:(TAT)n,Motif:A-rich,Motif:(TTTTA)n,Motif:(TCTTCCA)n,Motif:(TAATTTT)n,Motif:(TTTA)n,Motif:(TTTC)n	unmapped	N/A	N/A	N/A	N/A
c34424/f1p2/2544	2544	complete	195	0.78142	none	unmapped	N/A	N/A	N/A	N/A
c34494/f1p0/5082	4885	complete	216	0.104142	Motif:MuDR-N8_SBi,Motif:MuDR-N9_SBi	unmapped	N/A	N/A	N/A	N/A
c34515/f1p0/3522	3521	complete	294	1.57909	Motif:RLG_scDEL_1_2-LTR,Motif:RLG_scDEL_1_4-LTR,Motif:RLG_scDEL_1_3-LTR,Motif:RLG_scDEL_1_5-LTR	unmapped	N/A	N/A	N/A	N/A
c34528/f1p0/3959	3966	complete	273	0.893454	Motif:(GCCTC)n,Motif:(CCCTCT)n	unmapped	N/A	N/A	N/A	N/A
c3463/f1p1/2858	2828	complete	294	0.757695	none	unmapped	N/A	N/A	N/A	N/A
c34664/f1p0/2456	2446	complete	249	1.49102	Motif:(CT)n	unmapped	N/A	N/A	N/A	N/A
c34673/f1p0/1118	1120	complete	90	0.359511	Motif:(CCG)n,Motif:RLG_scTat_6_1-LTR	unmapped	N/A	N/A	N/A	N/A
c34686/f1p0/2499	2516	complete	297	1.1468	Motif:SINE2-1_BDi,Motif:MuDR-N7_SBi,Motif:A-rich	unmapped	N/A	N/A	N/A	N/A
c34702/f1p0/1067	1067	complete	129	5.09112	Motif:EnSpm-44_SBi	unmapped	N/A	N/A	N/A	N/A
c34775/f1p0/5542	5542	complete	276	0	Motif:(CGAGAA)n	unmapped	N/A	N/A	N/A	N/A
c34811/f1p0/1954	1922	complete	237	0	none	unmapped	N/A	N/A	N/A	N/A
c34836/f1p0/1177	1176	complete	153	0.210515	none	unmapped	N/A	N/A	N/A	N/A
c34880/f1p0/1226	1226	complete	93	0.640435	none	mapped	intergenic	Chr02	71028536	71027069
c34889/f1p0/3948	3740	complete	204	0.580825	Motif:(CGCT)n,Motif:(CGG)n,Motif:Helitron-2_SBi,Motif:Helitron-N3_SBi,Motif:(TCGCCA)n	unmapped	N/A	N/A	N/A	N/A
c34899/f1p0/1344	1348	complete	126	0.985723	Motif:EnSpm-38_SBi,Motif:EnSpm-43_SBi	unmapped	N/A	N/A	N/A	N/A
c34929/f1p0/1952	1953	complete	114	0.625501	none	unmapped	N/A	N/A	N/A	N/A
c34976/f1p0/2968	2951	complete	297	0.0204669	Motif:(T)n	unmapped	N/A	N/A	N/A	N/A
c35069/f1p0/4243	4242	complete	162	0	Motif:(GGT)n,Motif:(TTTATA)n,Motif:GA-rich	unmapped	N/A	N/A	N/A	N/A
c35109/f1p0/4934	4732	complete	258	0.273871	Motif:EnSpm-31_SBi	unmapped	N/A	N/A	N/A	N/A
c35116/f1p0/1308	1308	complete	159	0	none	unmapped	N/A	N/A	N/A	N/A
c35154/f1p0/4039	4048	complete	126	0	Motif:(T)n,Motif:(CGGCCCG)n,Motif:(TG)n	unmapped	N/A	N/A	N/A	N/A
c35213/f1p2/3744	3746	complete	150	0.0652472	Motif:DNA-12N_SBi	unmapped	N/A	N/A	N/A	N/A
c3522/f1p0/2173	2191	complete	258	0.682987	Motif:(CCTCT)n	unmapped	N/A	N/A	N/A	N/A
c35239/f1p0/1611	1609	complete	183	0.440595	Motif:MuDR-N8_SBi,Motif:MuDR-N9_SBi	unmapped	N/A	N/A	N/A	N/A
c35336/f1p0/1427	1428	complete	228	1.39703	none	unmapped	N/A	N/A	N/A	N/A
c3536/f1p0/1706	1707	complete	171	0.13032	none	unmapped	N/A	N/A	N/A	N/A
c35364/f1p5/3358	3359	complete	183	0.293356	Motif:(CGCCTC)n,Motif:(GCCCC)n,Motif:(CT)n,Motif:(CTCTC)n	unmapped	N/A	N/A	N/A	N/A
c35425/f1p0/1563	1560	complete	270	1.69063	none	unmapped	N/A	N/A	N/A	N/A
c35427/f1p0/1106	1214	complete	267	0.66334	none	unmapped	N/A	N/A	N/A	N/A
c3543/f1p0/1717	1714	complete	213	0.930127	Motif:ATHILA-1_SBi-LTR	unmapped	N/A	N/A	N/A	N/A
c35484/f1p0/2603	2604	complete	240	1.3781	none	unmapped	N/A	N/A	N/A	N/A
c35499/f1p1/2324	2323	complete	279	0.234653	none	unmapped	N/A	N/A	N/A	N/A
c35516/f1p2/3506	3511	complete	198	0.245923	none	unmapped	N/A	N/A	N/A	N/A
c35534/f1p0/1586	1572	complete	165	0.680591	none	unmapped	N/A	N/A	N/A	N/A
c35563/f1p1/2644	2651	complete	171	0.120487	Motif:SINE2-1_ZM,Motif:EnSpm8_SB,Motif:STOWAWAY2_SB	unmapped	N/A	N/A	N/A	N/A
c35585/f1p0/3262	3102	complete	270	0.13815	Motif:EnSpm-22_SBi	unmapped	N/A	N/A	N/A	N/A
c35662/f1p0/1240	1227	complete	102	0.0281372	none	unmapped	N/A	N/A	N/A	N/A
c35688/f1p0/1069	1069	complete	201	0.400764	Motif:(A)n	unmapped	N/A	N/A	N/A	N/A
c35767/f1p0/2310	2291	complete	267	0	none	unmapped	N/A	N/A	N/A	N/A
c35788/f1p0/2743	2791	complete	240	0.237934	none	unmapped	N/A	N/A	N/A	N/A
c35795/f1p1/3618	3618	complete	204	1.13759	none	unmapped	N/A	N/A	N/A	N/A
c35810/f1p0/1170	1170	complete	138	0.344148	none	unmapped	N/A	N/A	N/A	N/A
c35853/f1p0/1470	1470	complete	201	1.48867	Motif:(CT)n,Motif:(CCT)n	unmapped	N/A	N/A	N/A	N/A
c35854/f1p0/1751	1729	complete	162	0.51234	Motif:Helitron-1B_SBi	unmapped	N/A	N/A	N/A	N/A
c35870/f1p0/1312	1312	complete	258	0.537716	none	unmapped	N/A	N/A	N/A	N/A
c35909/f1p1/1345	1345	complete	120	0.403418	Motif:TSB2	unmapped	N/A	N/A	N/A	N/A
c35950/f1p0/1144	1144	complete	69	2.07662	Motif:(AGCCCC)n,Motif:EnSpm-41N_SBi	unmapped	N/A	N/A	N/A	N/A
c35962/f1p0/2269	2271	complete	138	0	Motif:(TTCTT)n	unmapped	N/A	N/A	N/A	N/A
c36032/f1p0/2246	2245	complete	204	0	Motif:(T)n	unmapped	N/A	N/A	N/A	N/A
c36071/f1p1/3624	3624	complete	165	0.730649	Motif:RLG_scDEL_1_1-LTR,Motif:RLG_scDEL_1_2-LTR	unmapped	N/A	N/A	N/A	N/A
c3616/f1p1/1389	1397	complete	225	0.555724	none	unmapped	N/A	N/A	N/A	N/A
c36259/f1p1/1101	1101	complete	279	4.3909	none	unmapped	N/A	N/A	N/A	N/A
c36291/f1p0/2640	2623	complete	123	0	Motif:(C)n	unmapped	N/A	N/A	N/A	N/A
c36306/f1p0/1140	1140	complete	105	0	Motif:EnSpm-38_SBi	unmapped	N/A	N/A	N/A	N/A
c36700/f1p0/2014	2015	complete	276	2.3372	Motif:MuDR-N8_SBi	unmapped	N/A	N/A	N/A	N/A
c36730/f1p0/1226	1246	complete	93	0.780788	Motif:Helitron-N2_SBi	unmapped	N/A	N/A	N/A	N/A
c36744/f1p0/1130	1060	complete	237	0.209432	Motif:(CCT)n	unmapped	N/A	N/A	N/A	N/A
c36900/f1p1/1141	1141	complete	120	10.9275	none	unmapped	N/A	N/A	N/A	N/A
c37143/f1p0/1508	1513	complete	246	0.997983	Motif:(CGCCAGC)n	unmapped	N/A	N/A	N/A	N/A
c37194/f1p0/1485	1499	complete	60	0.680765	Motif:(CCG)n,Motif:hAT-13_SBi	unmapped	N/A	N/A	N/A	N/A
c37262/f1p1/1513	1515	complete	42	2.06088	Motif:MuDR-N4_SBi,Motif:LTR-1_SBi,Motif:RLG_scDEL_2_1-LTR	unmapped	N/A	N/A	N/A	N/A
c37335/f1p0/1354	1363	complete	261	1.46213	none	unmapped	N/A	N/A	N/A	N/A
c37405/f1p0/4089	3968	complete	192	0.0690937	Motif:(AAGGAATG)n,Motif:(AT)n,Motif:(A)n	unmapped	N/A	N/A	N/A	N/A
c3741/f1p1/2887	2888	complete	153	1.15909	Motif:(CTCCT)n,Motif:(CTCG)n	unmapped	N/A	N/A	N/A	N/A
c37421/f1p0/1249	1242	complete	150	0.615975	none	unmapped	N/A	N/A	N/A	N/A
c37478/f2p1/2514	2514	complete	168	1.17595	Motif:LINE1-42_SBi	unmapped	N/A	N/A	N/A	N/A
c37502/f1p0/1852	1887	complete	171	0.0813917	Motif:LINE1-11_SBi	unmapped	N/A	N/A	N/A	N/A
c37563/f1p0/3340	3342	complete	219	0	Motif:(TGTT)n	unmapped	N/A	N/A	N/A	N/A
c37586/f1p0/1319	1322	complete	219	0.487326	none	unmapped	N/A	N/A	N/A	N/A
c37687/f1p0/1025	1025	complete	192	4.39972	none	unmapped	N/A	N/A	N/A	N/A
c37705/f1p0/1193	1190	complete	273	1.14109	none	unmapped	N/A	N/A	N/A	N/A
c37714/f1p0/6040	6114	complete	276	0.260137	Motif:(T)n,Motif:A-rich	unmapped	N/A	N/A	N/A	N/A
c37847/f1p1/1242	1244	complete	96	2.99532	Motif:(CGC)n	unmapped	N/A	N/A	N/A	N/A
c37861/f1p2/2332	2399	complete	213	0.301455	Motif:(CGG)n,Motif:HARB-N28_SBi	unmapped	N/A	N/A	N/A	N/A
c37976/f1p0/7620	7601	complete	165	0.0515232	Motif:A-rich	unmapped	N/A	N/A	N/A	N/A
c38004/f1p0/2470	2443	complete	123	0	none	unmapped	N/A	N/A	N/A	N/A
c38067/f1p0/3433	3301	complete	156	0.183357	Motif:(CTCC)n,Motif:Helitron-N11_SBi	unmapped	N/A	N/A	N/A	N/A
c38102/f1p1/1787	1789	complete	210	0.896062	Motif:(CT)n,Motif:(CCT)n	unmapped	N/A	N/A	N/A	N/A
c38109/f1p0/2461	2564	complete	201	1.10699	none	unmapped	N/A	N/A	N/A	N/A
c38129/f1p0/3248	3362	complete	174	0.459054	Motif:(TCTCCC)n,Motif:(TCTC)n,Motif:(TATT)n	unmapped	N/A	N/A	N/A	N/A
c38131/f1p0/3878	3879	complete	63	0	Motif:(GTGTGGTG)n,Motif:MuDR-9_SBi	unmapped	N/A	N/A	N/A	N/A
c3817/f1p0/3599	3600	complete	231	2.37846	none	unmapped	N/A	N/A	N/A	N/A
c38196/f1p0/1126	1125	complete	222	0.182557	Motif:REP1_SB	unmapped	N/A	N/A	N/A	N/A
c38227/f1p0/1422	1422	complete	144	0.531657	none	unmapped	N/A	N/A	N/A	N/A
c3837/f1p0/2647	2627	complete	171	0.423303	Motif:(CCCT)n,Motif:(TTTTCA)n	unmapped	N/A	N/A	N/A	N/A
c38466/f1p0/1437	1366	complete	150	0.269758	Motif:(T)n,Motif:(CGGCAG)n,Motif:(GCT)n	unmapped	N/A	N/A	N/A	N/A
c38554/f1p0/1069	1069	complete	213	0.376663	none	unmapped	N/A	N/A	N/A	N/A
c38578/f1p0/2646	2634	complete	231	0.539218	Motif:(CCCTCCG)n	unmapped	N/A	N/A	N/A	N/A
c38609/f1p1/2207	2207	complete	144	4.61758	Motif:(CCT)n	unmapped	N/A	N/A	N/A	N/A
c38678/f1p0/2338	2351	complete	210	0.461913	none	unmapped	N/A	N/A	N/A	N/A
c38750/f1p0/6075	6073	complete	174	0	Motif:(T)n,Motif:(CAG)n,Motif:A-rich,Motif:(CTTT)n,Motif:(A)n	unmapped	N/A	N/A	N/A	N/A
c38752/f1p0/1311	1313	complete	168	0.444666	Motif:EnSpm-15_SBi,Motif:Helitron-N2_SBi	mapped	intergenic	Chr08	42264260	42263032
c3880/f1p0/1342	1341	complete	165	2.5657	none	unmapped	N/A	N/A	N/A	N/A
c39090/f1p1/2687	2687	complete	222	4.57538	none	unmapped	N/A	N/A	N/A	N/A
c3911/f1p0/5648	5433	complete	240	0.180825	Motif:(T)n	unmapped	N/A	N/A	N/A	N/A
c39114/f1p2/2286	2285	complete	213	30.893	Motif:(CTCTC)n	unmapped	N/A	N/A	N/A	N/A
c39216/f1p0/3652	3646	complete	258	0	none	unmapped	N/A	N/A	N/A	N/A
c39317/f1p1/3181	3144	complete	273	1.45049	Motif:Gypsy-125N_SBi-LTR	unmapped	N/A	N/A	N/A	N/A
c39337/f1p0/2293	2291	complete	228	0.189897	Motif:(GCGACG)n	unmapped	N/A	N/A	N/A	N/A
c39481/f1p1/3435	3436	complete	174	0.521116	none	unmapped	N/A	N/A	N/A	N/A
c39494/f1p1/2453	2452	complete	267	0.425641	none	unmapped	N/A	N/A	N/A	N/A
c39517/f1p3/2835	2834	complete	231	1.94634	Motif:EnSpm-N15_SBi,Motif:RLG_scAle_1_2-I,Motif:hAT-N6_SBi	unmapped	N/A	N/A	N/A	N/A
c39757/f1p0/2478	2484	complete	243	0.273375	Motif:(CTCT)n,Motif:(CTCCCT)n	unmapped	N/A	N/A	N/A	N/A
c39841/f1p0/3825	3819	complete	195	0.135002	none	unmapped	N/A	N/A	N/A	N/A
c39882/f1p0/3323	3348	complete	276	0.405074	Motif:RLG_scTat_2_1-I	unmapped	N/A	N/A	N/A	N/A
c39997/f1p0/4874	4873	complete	297	0	Motif:(GCCCCG)n,Motif:Copia-127_SB-I,Motif:Copia-93_SB-LTR	unmapped	N/A	N/A	N/A	N/A
c40125/f1p2/4152	4152	complete	270	0	Motif:(GCC)n,Motif:LINE1-6_SBi	unmapped	N/A	N/A	N/A	N/A
c40133/f1p0/3702	3671	complete	228	0.0109686	Motif:(T)n	unmapped	N/A	N/A	N/A	N/A
c40138/f1p0/2803	2816	complete	225	2.17768	none	unmapped	N/A	N/A	N/A	N/A
c40374/f1p0/3039	2833	complete	87	0.144089	none	unmapped	N/A	N/A	N/A	N/A
c40378/f1p0/2936	2826	complete	210	0.133833	none	unmapped	N/A	N/A	N/A	N/A
c40403/f1p0/2525	2520	complete	174	0.382297	Motif:(TCTCCC)n,Motif:(TATT)n	unmapped	N/A	N/A	N/A	N/A
c40405/f1p0/3804	3720	complete	243	0.064402	Motif:(CCG)n,Motif:(TA)n	unmapped	N/A	N/A	N/A	N/A
c40422/f1p0/2851	2860	complete	129	0.482765	Motif:RLG_scTat_2_1-I	unmapped	N/A	N/A	N/A	N/A
c40484/f1p0/2444	2444	complete	201	1.34758	Motif:(CCG)n,Motif:(TATT)n	unmapped	N/A	N/A	N/A	N/A
c40569/f1p0/2619	2557	complete	123	0.0927587	none	unmapped	N/A	N/A	N/A	N/A
c40680/f1p1/2399	2401	complete	171	0.97318	none	unmapped	N/A	N/A	N/A	N/A
c40820/f1p0/2471	2459	complete	168	0.370906	Motif:(TCTCCC)n	unmapped	N/A	N/A	N/A	N/A
c4083/f1p2/2400	2396	complete	201	0.78326	none	unmapped	N/A	N/A	N/A	N/A
c40839/f1p0/2718	2679	complete	192	0.0300599	Motif:Gypsy-125N_SBi-LTR	unmapped	N/A	N/A	N/A	N/A
c40898/f1p0/2528	2536	complete	249	0.198468	none	unmapped	N/A	N/A	N/A	N/A
c4100/f1p0/3222	3218	complete	294	0.423042	Motif:(CCTCCG)n,Motif:HARB-N16_SBi,Motif:Copia-138_SB-I	unmapped	N/A	N/A	N/A	N/A
c41002/f1p0/2741	2705	complete	216	0.128408	Motif:RLG_scTat_2_1-I,Motif:(A)n	unmapped	N/A	N/A	N/A	N/A
c4108/f1p1/4408	4415	complete	294	1.49576	Motif:(CTC)n,Motif:EnSpm1_SB,Motif:Helitron-N14_SBi,Motif:EnSpm-N2_SBi	unmapped	N/A	N/A	N/A	N/A
c41151/f1p0/2899	2891	complete	102	0.775311	none	unmapped	N/A	N/A	N/A	N/A
c41335/f1p0/2799	2782	complete	288	0.0250571	none	unmapped	N/A	N/A	N/A	N/A
c4135/f1p0/2619	2622	complete	192	1.03809	Motif:(CCT)n,Motif:HARB2_ZM,Motif:DNA-12N_SBi	unmapped	N/A	N/A	N/A	N/A
c41382/f1p0/2253	2280	complete	246	1.79378	Motif:MuDR-N8_SBi	unmapped	N/A	N/A	N/A	N/A
c4145/f1p0/4092	4088	complete	282	0.238651	Motif:(T)n	unmapped	N/A	N/A	N/A	N/A
c4160/f1p0/5364	5286	complete	192	0	Motif:(CGCCGT)n,Motif:RTE-1_TD,Motif:RTE1_ZM	unmapped	N/A	N/A	N/A	N/A
c4173/f1p0/1432	1432	complete	174	0	Motif:(TATTAA)n	unmapped	N/A	N/A	N/A	N/A
c41763/f1p0/2699	2703	complete	192	0.707585	none	unmapped	N/A	N/A	N/A	N/A
c4177/f1p0/1446	1446	complete	228	0.537826	none	unmapped	N/A	N/A	N/A	N/A
c41771/f1p0/2343	2344	complete	246	5.20714	Motif:(CT)n,Motif:(GGC)n,Motif:(TAT)n	unmapped	N/A	N/A	N/A	N/A
c41818/f1p0/2601	2534	complete	249	0.229044	Motif:(CG)n,Motif:(TC)n,Motif:(CGG)n,Motif:(CT)n	unmapped	N/A	N/A	N/A	N/A
c4184/f1p2/1304	1304	complete	69	1.31233	Motif:(CTTT)n,Motif:(TT)n	unmapped	N/A	N/A	N/A	N/A
c41968/f2p0/2205	2208	complete	144	2.7635	none	unmapped	N/A	N/A	N/A	N/A
c42185/f1p0/2746	2437	complete	159	0.294137	Motif:(T)n	unmapped	N/A	N/A	N/A	N/A
c42325/f1p0/2591	2561	complete	132	0.501826	Motif:(CT)n	unmapped	N/A	N/A	N/A	N/A
c42407/f1p1/2514	2520	complete	132	1.32651	none	unmapped	N/A	N/A	N/A	N/A
c4244/f1p0/6111	5992	complete	285	0.146078	Motif:MuDR-N4_SBi,Motif:RLG_scDEL_2_2-LTR,Motif:LTR-1_SBi,Motif:(TTTA)n	unmapped	N/A	N/A	N/A	N/A
c42460/f1p0/2499	2528	complete	150	0.21527	Motif:(ATTT)n,Motif:Helitron-N2_SBi	unmapped	N/A	N/A	N/A	N/A
c42591/f1p0/2347	2347	complete	126	0.107917	none	unmapped	N/A	N/A	N/A	N/A
c42600/f1p1/4801	4906	complete	207	0.621417	Motif:(T)n,Motif:Copia-77_SB-I,Motif:Helitron-N11_SBi	unmapped	N/A	N/A	N/A	N/A
c42643/f1p0/747	747	complete	201	13.7721	Motif:Mariner-2_SBi	unmapped	N/A	N/A	N/A	N/A
c42715/f1p0/2197	2198	complete	171	0.650746	Motif:MuDR-N8_SBi,Motif:MuDR-N9_SBi	unmapped	N/A	N/A	N/A	N/A
c42749/f1p0/2353	2369	complete	252	0.21493	none	unmapped	N/A	N/A	N/A	N/A
c42839/f1p0/2497	2497	complete	180	0.953888	Motif:hAT-N15_ZM,Motif:(TGCT)n,Motif:PREM1	unmapped	N/A	N/A	N/A	N/A
c4296/f1p1/1379	1376	complete	84	1.81282	none	mapped	intergenic	Chr09	8824012	8819998
c4310/f1p0/2324	2332	complete	198	2.61217	Motif:EnSpm-42_SBi	unmapped	N/A	N/A	N/A	N/A
c43108/f1p0/2494	2494	complete	84	0	Motif:(ATATATA)n,Motif:(CGTCGG)n	unmapped	N/A	N/A	N/A	N/A
c43320/f1p0/2261	2257	complete	126	0.738672	none	unmapped	N/A	N/A	N/A	N/A
c43447/f1p3/2867	2867	complete	243	0	none	unmapped	N/A	N/A	N/A	N/A
c43518/f1p0/573	573	complete	246	2.06041	none	unmapped	N/A	N/A	N/A	N/A
c43855/f1p0/2594	2621	complete	276	2.14886	none	unmapped	N/A	N/A	N/A	N/A
c4386/f1p2/2413	2408	complete	165	2.33892	Motif:(TC)n,Motif:(C)n	unmapped	N/A	N/A	N/A	N/A
c4391/f1p0/1100	1100	complete	252	0.219629	none	unmapped	N/A	N/A	N/A	N/A
c43962/f1p0/2480	2342	complete	192	0.0378299	Motif:A-rich	unmapped	N/A	N/A	N/A	N/A
c43999/f1p0/6681	6708	complete	258	0	Motif:(T)n,Motif:(TTGTT)n	unmapped	N/A	N/A	N/A	N/A
c44075/f1p0/2237	2242	complete	180	0.689145	Motif:EnSpm-22_SBi	unmapped	N/A	N/A	N/A	N/A
c44084/f1p0/2745	2739	complete	99	3.78037	none	unmapped	N/A	N/A	N/A	N/A
c44085/f1p0/2801	2682	complete	177	0.0239897	Motif:EnSpm-N18_SBi	unmapped	N/A	N/A	N/A	N/A
c44248/f1p0/2446	2446	complete	222	1.29763	none	unmapped	N/A	N/A	N/A	N/A
c44469/f1p0/2339	2345	complete	183	0.159828	none	unmapped	N/A	N/A	N/A	N/A
c4449/f1p2/2483	2481	complete	111	0.807051	Motif:EnSpm-N18_SBi,Motif:STOWAWAY1_SB	unmapped	N/A	N/A	N/A	N/A
c4466/f1p0/7377	7087	complete	141	0	Motif:(GCGC)n,Motif:(CCTCT)n	unmapped	N/A	N/A	N/A	N/A
c44694/f1p0/2409	2399	complete	87	0.924551	none	unmapped	N/A	N/A	N/A	N/A
c44709/f1p0/6989	7003	complete	153	0	Motif:(T)n,Motif:hAT-N18_SBi,Motif:EnSpm12_SB,Motif:(TAAGA)n	unmapped	N/A	N/A	N/A	N/A
c44798/f1p0/2328	2363	complete	138	0.263084	none	unmapped	N/A	N/A	N/A	N/A
c44928/f1p0/3151	2957	complete	207	0.0396002	none	unmapped	N/A	N/A	N/A	N/A
c45022/f1p2/2563	2564	complete	267	1.4691	Motif:(GCC)n	unmapped	N/A	N/A	N/A	N/A
c45208/f1p0/4138	4154	complete	141	0	Motif:(T)n	unmapped	N/A	N/A	N/A	N/A
c4552/f1p0/3278	3306	complete	81	0.371451	Motif:(AT)n,Motif:Gypsy-8_SB-LTR,Motif:Gypsy-139_SBi-LTR,Motif:EnSpm-N17_SBi,Motif:Helitron-2_SBi	unmapped	N/A	N/A	N/A	N/A
c4561/f1p0/1313	1312	complete	195	0.427574	none	Sobic.002G052500	exon	Chr02	4976911	4979102
c4629/f1p0/1547	1543	complete	234	3.22279	Motif:(GGTT)n	unmapped	N/A	N/A	N/A	N/A
c46619/f2p2/2276	2276	complete	147	4.14072	none	unmapped	N/A	N/A	N/A	N/A
c4692/f1p0/1479	1391	complete	135	0.371015	none	unmapped	N/A	N/A	N/A	N/A
c4696/f1p0/3022	3018	complete	132	0.113405	none	unmapped	N/A	N/A	N/A	N/A
c4703/f2p0/2766	2767	complete	186	0.175237	none	unmapped	N/A	N/A	N/A	N/A
c4840/f1p0/7433	7433	complete	99	0	Motif:(C)n,Motif:GA-rich	unmapped	N/A	N/A	N/A	N/A
c4929/f1p1/3809	3810	complete	204	0.0883344	none	unmapped	N/A	N/A	N/A	N/A
c5045/f1p1/1090	1089	complete	114	1.3684	none	unmapped	N/A	N/A	N/A	N/A
c5071/f2p1/3688	3686	complete	126	1.03613	Motif:(GCC)n,Motif:(CT)n,Motif:(TAA)n,Motif:RLG_scTat_4_1-I	unmapped	N/A	N/A	N/A	N/A
c5099/f2p0/3689	3699	complete	240	0.172018	Motif:(GGC)n	unmapped	N/A	N/A	N/A	N/A
c5125/f1p0/1271	1269	complete	114	0.206245	none	unmapped	N/A	N/A	N/A	N/A
c5162/f1p0/1258	1259	complete	90	4.91847	Motif:(GCC)n	unmapped	N/A	N/A	N/A	N/A
c5168/f1p0/2329	2330	complete	222	0.346229	none	unmapped	N/A	N/A	N/A	N/A
c5207/f1p0/1125	1125	complete	135	7.38573	none	unmapped	N/A	N/A	N/A	N/A
c5265/f1p0/1185	1185	complete	198	3.10639	none	unmapped	N/A	N/A	N/A	N/A
c5283/f1p0/1691	1625	complete	165	0	Motif:NonLTR-1_SBi	unmapped	N/A	N/A	N/A	N/A
c5301/f1p0/1296	1295	complete	183	0.823962	Motif:DNA-4_SBi	unmapped	N/A	N/A	N/A	N/A
c5443/f1p0/2844	2840	complete	270	0.115334	none	unmapped	N/A	N/A	N/A	N/A
c5445/f1p0/7993	7987	complete	273	0	Motif:(T)n,Motif:(CCCGCG)n,Motif:(A)n	unmapped	N/A	N/A	N/A	N/A
c5463/f1p0/3957	3945	complete	201	0.634461	Motif:Helitron-N2_SBi	unmapped	N/A	N/A	N/A	N/A
c5535/f1p0/1277	1277	complete	99	0.374424	Motif:RLG_scTat_2_1-I,Motif:ATHILA-1_SBi-LTR	unmapped	N/A	N/A	N/A	N/A
c5564/f1p0/3478	3367	complete	192	0	Motif:(C)n,Motif:(CCGCGG)n	unmapped	N/A	N/A	N/A	N/A
c5797/f1p1/5599	5608	complete	213	0.0977671	Motif:STOWAWAY12_SB	unmapped	N/A	N/A	N/A	N/A
c5811/f1p0/2414	2419	complete	132	0.520677	Motif:EnSpm-35_SBi,Motif:(GCGCTG)n	unmapped	N/A	N/A	N/A	N/A
c5841/f1p0/2951	2942	complete	168	0.42019	none	unmapped	N/A	N/A	N/A	N/A
c5893/f1p0/1155	1142	complete	63	4.34155	none	unmapped	N/A	N/A	N/A	N/A
c6029/f1p0/2423	2450	complete	198	0.279392	Motif:HARB-8_SBi	unmapped	N/A	N/A	N/A	N/A
c6101/f1p0/2424	2424	complete	219	1.2381	none	unmapped	N/A	N/A	N/A	N/A
c6188/f1p1/1211	1210	complete	60	5.04733	none	unmapped	N/A	N/A	N/A	N/A
c6197/f1p0/2452	2451	complete	108	1.16628	Motif:EnSpm-41N_SBi	unmapped	N/A	N/A	N/A	N/A
c6338/f1p0/3369	3414	complete	171	0.250083	none	unmapped	N/A	N/A	N/A	N/A
c6389/f1p2/2950	2950	complete	168	0.481843	Motif:(TC)n,Motif:(C)n	unmapped	N/A	N/A	N/A	N/A
c6444/f1p1/1335	1345	complete	249	4.26603	none	unmapped	N/A	N/A	N/A	N/A
c6466/f1p0/12429	12472	complete	204	0.0225992	Motif:(ACCACCA)n,Motif:(AT)n	unmapped	N/A	N/A	N/A	N/A
c6510/f1p0/2247	2252	complete	165	0.957057	Motif:RLG_scDEL_2_1-LTR	unmapped	N/A	N/A	N/A	N/A
c6552/f1p0/2465	2467	complete	270	0.897174	none	unmapped	N/A	N/A	N/A	N/A
c6577/f1p0/2912	2912	complete	90	0	none	unmapped	N/A	N/A	N/A	N/A
c6624/f1p2/1694	1698	complete	138	4.60321	Motif:(CTTCTC)n,Motif:(TC)n,Motif:EnSpm-22_SBi,Motif:EnSpm1_SB,Motif:Helitron-N14_SBi	unmapped	N/A	N/A	N/A	N/A
c6674/f1p0/6959	6956	complete	153	0	Motif:STOWAWAY1_SB,Motif:TSB1,Motif:(A)n	unmapped	N/A	N/A	N/A	N/A
c6679/f1p0/5249	5449	complete	195	0.0199542	Motif:(CTC)n,Motif:SINE2-1_ZM,Motif:(CCCT)n,Motif:REP1_SB	unmapped	N/A	N/A	N/A	N/A
c6734/f1p0/1356	1361	complete	228	1.34642	Motif:(TC)n,Motif:(AGC)n	unmapped	N/A	N/A	N/A	N/A
c6745/f1p0/2372	2371	complete	207	0.845693	none	unmapped	N/A	N/A	N/A	N/A
c6747/f1p2/1286	1286	complete	120	0	Motif:Tourist1c_SB	unmapped	N/A	N/A	N/A	N/A
c6762/f1p0/3826	3817	complete	231	0.0583634	none	unmapped	N/A	N/A	N/A	N/A
c6780/f2p0/3476	3477	complete	207	1.48347	Motif:RLG_scDEL_1_2-LTR,Motif:RLG_scDEL_1_2-I	unmapped	N/A	N/A	N/A	N/A
c6784/f1p0/1144	1144	complete	81	1.45286	Motif:EnSpm-43_SBi	unmapped	N/A	N/A	N/A	N/A
c6794/f1p0/1931	1934	complete	132	0.0104099	Motif:GA-rich	unmapped	N/A	N/A	N/A	N/A
c6807/f1p0/3401	3399	complete	213	1.03776	Motif:Gypsy-139_SBi-LTR,Motif:Gypsy-126_SBi-LTR,Motif:RLG_scDEL_2_2-LTR,Motif:MuDR-N4_SBi,Motif:RLG_scDEL_1_5-LTR	unmapped	N/A	N/A	N/A	N/A
c6864/f1p1/6478	6497	complete	171	0.154738	Motif:(ATTTGT)n	unmapped	N/A	N/A	N/A	N/A
c6873/f1p0/1472	1473	complete	249	4.00135	none	unmapped	N/A	N/A	N/A	N/A
c6987/f1p0/3412	3179	complete	171	0	Motif:(CCTC)n,Motif:EnSpm-N39_SBi,Motif:(A)n	unmapped	N/A	N/A	N/A	N/A
c7000/f1p0/3223	3229	complete	141	0.0249398	Motif:Gypsy-138_SBi-LTR,Motif:Copia22-ZM_LTR	unmapped	N/A	N/A	N/A	N/A
c7017/f1p0/5297	5344	complete	135	0.061148	Motif:(TCCCC)n,Motif:Helitron-N10_SBi	unmapped	N/A	N/A	N/A	N/A
c7062/f1p0/2615	2616	complete	135	0.0625614	Motif:(GCCGCC)n,Motif:(GCTCCC)n	unmapped	N/A	N/A	N/A	N/A
c7116/f1p0/1839	1840	complete	87	0	none	unmapped	N/A	N/A	N/A	N/A
c7169/f5p4/1361	1362	complete	228	16.9035	Motif:GA-rich	unmapped	N/A	N/A	N/A	N/A
c7180/f1p0/4746	4966	complete	180	0.0174929	Motif:REP1_SB,Motif:LATIDU1_TM,Motif:SINE2-1_ZM,Motif:(GTTAAGT)n,Motif:Gypsy-14_SB-LTR	unmapped	N/A	N/A	N/A	N/A
c7323/f1p0/1944	1953	complete	156	0.443269	none	unmapped	N/A	N/A	N/A	N/A
c7363/f1p0/3489	3482	complete	171	0.0512189	Motif:(CTCGCG)n,Motif:Au,Motif:EnSpm8_SB,Motif:STOWAWAY2_SB	unmapped	N/A	N/A	N/A	N/A
c7402/f1p0/4125	4183	complete	264	0.107752	none	unmapped	N/A	N/A	N/A	N/A
c7567/f1p1/2212	2213	complete	279	0.137109	none	unmapped	N/A	N/A	N/A	N/A
c7625/f1p0/6124	6107	complete	141	0.0164833	Motif:(CTCCAT)n,Motif:(TTC)n	unmapped	N/A	N/A	N/A	N/A
c7654/f1p1/2356	2360	complete	243	3.10694	Motif:(CTCTC)n	unmapped	N/A	N/A	N/A	N/A
c7703/f1p1/2674	2673	complete	174	0.811405	Motif:EnSpm-30_SBi,Motif:(A)n	unmapped	N/A	N/A	N/A	N/A
c7799/f1p0/3131	3129	complete	222	0	Motif:L1-7_SBi,Motif:(A)n,Motif:A-rich	unmapped	N/A	N/A	N/A	N/A
c7823/f1p0/3204	3222	complete	294	1.21306	Motif:(CGCCTC)n	unmapped	N/A	N/A	N/A	N/A
c7838/f1p0/1286	1286	complete	297	0.498196	Motif:(CT)n,Motif:(CCT)n	unmapped	N/A	N/A	N/A	N/A
c7848/f1p0/1483	1483	complete	114	2.03063	Motif:Gypsy67-ZM_LTR,Motif:RLG_scDEL_2_2-LTR,Motif:RLG_scDEL_2_1-LTR,Motif:LTR-1_SBi	unmapped	N/A	N/A	N/A	N/A
c7851/f1p0/3865	3884	complete	240	0.0957034	none	unmapped	N/A	N/A	N/A	N/A
c7886/f1p0/4681	4613	complete	114	0	none	unmapped	N/A	N/A	N/A	N/A
c7918/f1p1/1204	1211	complete	96	0.611494	Motif:(CGC)n	unmapped	N/A	N/A	N/A	N/A
c8011/f1p1/1249	1253	complete	270	18.3187	none	unmapped	N/A	N/A	N/A	N/A
c8055/f1p0/2451	2351	complete	90	0.0171523	Motif:(CTCCCT)n	unmapped	N/A	N/A	N/A	N/A
c8153/f1p0/1472	1474	complete	141	1.21264	none	unmapped	N/A	N/A	N/A	N/A
c8201/f1p1/1171	1182	complete	201	1.80143	Motif:(GCC)n,Motif:RLG_scTat_2_1-I	unmapped	N/A	N/A	N/A	N/A
c8264/f1p1/3865	3892	complete	138	0.448686	Motif:HARB-9_SBi,Motif:Copia-38-LTR_ZM	unmapped	N/A	N/A	N/A	N/A
c8287/f1p0/2215	2214	complete	60	1.06654	Motif:(CCT)n	unmapped	N/A	N/A	N/A	N/A
c8288/f1p0/1052	1052	complete	177	1.11952	none	unmapped	N/A	N/A	N/A	N/A
c8297/f1p0/1246	1249	complete	129	0	Motif:(T)n,Motif:LINE1-47_ZM	unmapped	N/A	N/A	N/A	N/A
c8337/f2p0/588	588	complete	141	44.9232	Motif:(CGA)n	unmapped	N/A	N/A	N/A	N/A
c8459/f1p0/3510	3621	complete	189	0.212814	Motif:(CTTCTC)n,Motif:(TC)n,Motif:EnSpm-22_SBi,Motif:EnSpm-2_TD,Motif:Helitron-N14_SBi	unmapped	N/A	N/A	N/A	N/A
c8535/f1p1/2745	2757	complete	264	0.592336	Motif:G-rich,Motif:EnSpm-22_SBi	unmapped	N/A	N/A	N/A	N/A
c8589/f1p1/3578	3598	complete	51	0.697098	Motif:(TCCCTC)n,Motif:Gypsy-6_SB-LTR	unmapped	N/A	N/A	N/A	N/A
c8608/f1p0/2569	2570	complete	135	2.61649	none	unmapped	N/A	N/A	N/A	N/A
c8636/f1p0/1263	1256	complete	105	0.331827	none	unmapped	N/A	N/A	N/A	N/A
c8694/f1p1/2243	2231	complete	249	0.29759	Motif:Helitron-N11_SBi	unmapped	N/A	N/A	N/A	N/A
c8742/f1p0/8182	8148	complete	237	0.0247087	Motif:(CCCCTT)n	unmapped	N/A	N/A	N/A	N/A
c8766/f1p0/2441	2442	complete	267	12.8754	Motif:(CTCTC)n	unmapped	N/A	N/A	N/A	N/A
c8803/f1p0/1782	1777	complete	102	0.436867	none	unmapped	N/A	N/A	N/A	N/A
c8831/f1p0/6642	6641	complete	213	0	none	unmapped	N/A	N/A	N/A	N/A
c8865/f1p0/5339	5318	complete	180	0.106001	Motif:RLG_scTat_4_1-LTR,Motif:HARB-9_SBi,Motif:RLG_scTat_1_1-LTR,Motif:hAT-N3_SBi,Motif:HARB-N9_SBi,Motif:mPing-1_SBi	unmapped	N/A	N/A	N/A	N/A
c9034/f1p0/1266	1251	complete	192	0.314911	none	unmapped	N/A	N/A	N/A	N/A
c9042/f1p0/1270	1281	complete	129	0.0741105	Motif:(AT)n	unmapped	N/A	N/A	N/A	N/A
c9092/f1p0/2336	2295	complete	261	1.17553	Motif:(CGGCG)n	unmapped	N/A	N/A	N/A	N/A
c9151/f1p0/3994	3790	complete	120	0.342871	Motif:Gypsy-126_SBi-I,Motif:Gypsy66-ZM_LTR,Motif:RLG_scDEL_2_1-LTR	unmapped	N/A	N/A	N/A	N/A
c9189/f1p0/1254	1255	complete	213	0.578643	Motif:(CATATG)n	unmapped	N/A	N/A	N/A	N/A
c9192/f1p0/3471	3324	complete	240	0.122596	none	unmapped	N/A	N/A	N/A	N/A
c9205/f1p0/1618	1618	complete	291	0.413173	none	unmapped	N/A	N/A	N/A	N/A
c9282/f1p0/1334	1334	complete	213	0.392591	Motif:ATHILA-7_SBi-LTR	unmapped	N/A	N/A	N/A	N/A
c9364/f1p0/1393	1392	complete	135	3.29781	Motif:EnSpm-14_SBi	unmapped	N/A	N/A	N/A	N/A
c9537/f1p0/2650	2650	complete	174	0.433334	Motif:ATHILA-7_SBi-LTR,Motif:Gypsy-132_SBi-LTR	unmapped	N/A	N/A	N/A	N/A
c9646/f1p1/3380	3519	complete	165	0.192876	Motif:Gypsy-125N_SBi-LTR	unmapped	N/A	N/A	N/A	N/A
c9680/f1p0/2319	2310	complete	135	0.246782	none	unmapped	N/A	N/A	N/A	N/A
c9792/f1p0/1553	1553	complete	192	0.201858	Motif:EnSpm-N21_SBi,Motif:ATHILA-2_SBi-I	unmapped	N/A	N/A	N/A	N/A
c9834/f1p0/1565	1565	complete	135	4.19823	Motif:EnSpm-14_SBi	unmapped	N/A	N/A	N/A	N/A
c9935/f1p1/2704	2703	complete	204	1.15086	Motif:(CCTCGCG)n,Motif:(GCT)n,Motif:SINE2-1_ZM	unmapped	N/A	N/A	N/A	N/A
c10542/f1p0/2660	2653	no ORF	N/A	1.91992	Motif:EnSpm-N39_SBi,Motif:G-rich	unmapped	N/A	N/A	N/A	N/A
c10784/f1p0/1115	1115	no ORF	N/A	0	none	unmapped	N/A	N/A	N/A	N/A
c10813/f1p2/1670	1670	no ORF	N/A	2.89156	Motif:(GCTCCGA)n,Motif:(TGTA)n	unmapped	N/A	N/A	N/A	N/A
c10960/f1p0/460	460	no ORF	N/A	0.662059	Motif:OLO24C_SB	unmapped	N/A	N/A	N/A	N/A
c11867/f1p0/1387	1387	no ORF	N/A	4.62237	none	unmapped	N/A	N/A	N/A	N/A
c11878/f1p0/1074	1075	no ORF	N/A	1.27351	none	unmapped	N/A	N/A	N/A	N/A
c12047/f1p0/882	882	no ORF	N/A	0	none	unmapped	N/A	N/A	N/A	N/A
c12489/f1p0/2840	2836	no ORF	N/A	0	Motif:RLG_scTat_2_1-I	unmapped	N/A	N/A	N/A	N/A
c12637/f1p0/758	758	no ORF	N/A	1.37303	none	unmapped	N/A	N/A	N/A	N/A
c13358/f2p3/1335	1335	no ORF	N/A	10.9612	none	unmapped	N/A	N/A	N/A	N/A
c14664/f1p1/1246	1246	no ORF	N/A	4.15625	none	unmapped	N/A	N/A	N/A	N/A
c14708/f1p0/2001	1985	no ORF	N/A	0.0320463	none	unmapped	N/A	N/A	N/A	N/A
c14758/f1p1/1543	1540	no ORF	N/A	0.990523	Motif:Gypsy-N129_SBi-LTR,Motif:Gypsy-139_SBi-LTR	unmapped	N/A	N/A	N/A	N/A
c14932/f1p0/1478	1460	no ORF	N/A	0.697501	Motif:(TCGCCG)n,Motif:(T)n,Motif:NonLTR-1_SBi	unmapped	N/A	N/A	N/A	N/A
c15031/f1p0/2085	2084	no ORF	N/A	0	none	unmapped	N/A	N/A	N/A	N/A
c15145/f1p0/1151	1151	no ORF	N/A	3.8831	none	unmapped	N/A	N/A	N/A	N/A
c15496/f1p0/1404	1404	no ORF	N/A	0	none	unmapped	N/A	N/A	N/A	N/A
c15715/f1p0/390	389	no ORF	N/A	0	none	unmapped	N/A	N/A	N/A	N/A
c16509/f1p0/1043	1043	no ORF	N/A	3.90747	Motif:(CTC)n,Motif:EnSpm-36_SBi	unmapped	N/A	N/A	N/A	N/A
c16515/f1p0/1267	1218	no ORF	N/A	0.0495878	none	unmapped	N/A	N/A	N/A	N/A
c16814/f1p0/1172	1172	no ORF	N/A	0	Motif:TSB2	unmapped	N/A	N/A	N/A	N/A
c17112/f3p0/1351	1351	no ORF	N/A	12.1367	Motif:GA-rich,Motif:(GCGGCT)n,Motif:(ATATGT)n	unmapped	N/A	N/A	N/A	N/A
c17213/f1p0/2537	2536	no ORF	N/A	0.14785	none	unmapped	N/A	N/A	N/A	N/A
c17375/f1p0/3321	3331	no ORF	N/A	0	none	unmapped	N/A	N/A	N/A	N/A
c17445/f1p1/1230	1230	no ORF	N/A	13.6678	Motif:LTR-1_SBi	unmapped	N/A	N/A	N/A	N/A
c17583/f1p1/1369	1368	no ORF	N/A	2.65419	Motif:(GTATAT)n,Motif:(AT)n	unmapped	N/A	N/A	N/A	N/A
c17687/f1p0/1228	1246	no ORF	N/A	0.913972	none	unmapped	N/A	N/A	N/A	N/A
c17885/f1p0/1499	1508	no ORF	N/A	1.25027	Motif:RLG_scTat_2_1-I	unmapped	N/A	N/A	N/A	N/A
c18156/f1p0/2264	2200	no ORF	N/A	0.25844	none	unmapped	N/A	N/A	N/A	N/A
c18290/f1p0/1007	1013	no ORF	N/A	1.97788	Motif:(CGG)n	unmapped	N/A	N/A	N/A	N/A
c18436/f1p0/1142	1142	no ORF	N/A	1.803	Motif:GA-rich	unmapped	N/A	N/A	N/A	N/A
c18753/f1p0/913	935	no ORF	N/A	7.12717	none	unmapped	N/A	N/A	N/A	N/A
c18937/f1p0/1160	1159	no ORF	N/A	0.49804	Motif:(TTTGAAC)n	unmapped	N/A	N/A	N/A	N/A
c18975/f1p1/1312	1312	no ORF	N/A	2.44887	Motif:LTR-1_SBi	unmapped	N/A	N/A	N/A	N/A
c19088/f1p0/410	411	no ORF	N/A	0	Motif:(GCTA)n	unmapped	N/A	N/A	N/A	N/A
c19137/f1p1/904	904	no ORF	N/A	7.99512	Motif:(CGCT)n	unmapped	N/A	N/A	N/A	N/A
c19707/f1p2/1215	1216	no ORF	N/A	1.67327	Motif:Gypsy-125N_SBi-LTR	unmapped	N/A	N/A	N/A	N/A
c19960/f1p0/1182	1195	no ORF	N/A	0.271782	none	unmapped	N/A	N/A	N/A	N/A
c20028/f1p3/1348	1350	no ORF	N/A	1.08289	Motif:GA-rich,Motif:(GTAT)n	unmapped	N/A	N/A	N/A	N/A
c20045/f1p1/1127	1125	no ORF	N/A	2.18327	none	unmapped	N/A	N/A	N/A	N/A
c20258/f1p0/1230	1230	no ORF	N/A	0.65472	Motif:LTR-1_SBi,Motif:MuDR-N4_SBi,Motif:Gypsy-100_SB-LTR,Motif:Gypsy-133_SBi-LTR	unmapped	N/A	N/A	N/A	N/A
c20320/f1p0/1230	1229	no ORF	N/A	1.96218	Motif:HARB2_ZM,Motif:DNA-12N_SBi	unmapped	N/A	N/A	N/A	N/A
c20363/f1p0/3805	3792	no ORF	N/A	0.0159277	none	unmapped	N/A	N/A	N/A	N/A
c20564/f1p0/2613	2641	no ORF	N/A	0.269428	Motif:(GCC)n	unmapped	N/A	N/A	N/A	N/A
c20660/f1p0/5736	5704	no ORF	N/A	0	Motif:(TATAT)n	unmapped	N/A	N/A	N/A	N/A
c20861/f1p0/2332	2328	no ORF	N/A	2.28394	Motif:HARB-9_SBi,Motif:Copia-38-LTR_ZM	unmapped	N/A	N/A	N/A	N/A
c21059/f1p0/1289	1289	no ORF	N/A	4.95845	Motif:G-rich	unmapped	N/A	N/A	N/A	N/A
c21126/f1p0/915	915	no ORF	N/A	23.7318	none	unmapped	N/A	N/A	N/A	N/A
c21395/f1p0/1480	1481	no ORF	N/A	1.09282	Motif:(CCTCCGG)n,Motif:(CCT)n,Motif:(CCACCC)n	unmapped	N/A	N/A	N/A	N/A
c21587/f1p3/2513	2514	no ORF	N/A	6.51429	Motif:(CGCCTC)n,Motif:(GCCCC)n,Motif:(CT)n,Motif:(CTCTC)n	unmapped	N/A	N/A	N/A	N/A
c21825/f1p0/669	660	no ORF	N/A	67.7189	none	unmapped	N/A	N/A	N/A	N/A
c21934/f1p0/1463	1465	no ORF	N/A	0	Motif:(CGC)n,Motif:RTE-1_SBi,Motif:(CTCTCG)n,Motif:(CTCG)n	unmapped	N/A	N/A	N/A	N/A
c22076/f2p0/1049	1050	no ORF	N/A	7.53772	none	unmapped	N/A	N/A	N/A	N/A
c22130/f1p0/1441	1441	no ORF	N/A	0	none	unmapped	N/A	N/A	N/A	N/A
c22505/f1p0/5035	5025	no ORF	N/A	0	none	unmapped	N/A	N/A	N/A	N/A
c23022/f1p0/1271	1265	no ORF	N/A	0	Motif:(GGTGCT)n	unmapped	N/A	N/A	N/A	N/A
c23398/f2p3/1116	1118	no ORF	N/A	15.582	Motif:GA-rich,Motif:G-rich,Motif:(AT)n,Motif:RLG_scDEL_1_4-LTR	unmapped	N/A	N/A	N/A	N/A
c23434/f1p0/1205	1205	no ORF	N/A	0	none	unmapped	N/A	N/A	N/A	N/A
c23453/f1p1/1189	1188	no ORF	N/A	5.03556	none	unmapped	N/A	N/A	N/A	N/A
c23862/f1p0/4651	4643	no ORF	N/A	0.0520335	Motif:(CTTT)n	unmapped	N/A	N/A	N/A	N/A
c2482/f1p0/1164	1164	no ORF	N/A	0	Motif:OLO24B_SB	unmapped	N/A	N/A	N/A	N/A
c24867/f1p1/1416	1396	no ORF	N/A	0.977971	none	unmapped	N/A	N/A	N/A	N/A
c24993/f1p0/1173	1173	no ORF	N/A	9.8033	Motif:G-rich	unmapped	N/A	N/A	N/A	N/A
c25054/f1p0/1180	1180	no ORF	N/A	0.0757127	Motif:(GCC)n	unmapped	N/A	N/A	N/A	N/A
c25219/f1p2/1041	1040	no ORF	N/A	19.0135	none	unmapped	N/A	N/A	N/A	N/A
c26057/f1p0/1100	1100	no ORF	N/A	0.370483	none	unmapped	N/A	N/A	N/A	N/A
c26352/f1p0/1127	1131	no ORF	N/A	4.09591	Motif:EnSpm-44_SBi	unmapped	N/A	N/A	N/A	N/A
c26369/f1p0/1098	1107	no ORF	N/A	2.00331	Motif:(CCTCTC)n,Motif:Copia-54_ZM-I	unmapped	N/A	N/A	N/A	N/A
c26482/f1p0/1363	1363	no ORF	N/A	7.05263	none	unmapped	N/A	N/A	N/A	N/A
c26539/f1p0/1443	1449	no ORF	N/A	0.139796	none	unmapped	N/A	N/A	N/A	N/A
c28287/f1p0/1127	1129	no ORF	N/A	0.2282	none	unmapped	N/A	N/A	N/A	N/A
c28657/f1p1/1339	1340	no ORF	N/A	0	none	unmapped	N/A	N/A	N/A	N/A
c28736/f1p3/1210	1211	no ORF	N/A	2.82757	Motif:GA-rich	unmapped	N/A	N/A	N/A	N/A
c28819/f1p0/3325	3291	no ORF	N/A	0	none	unmapped	N/A	N/A	N/A	N/A
c28831/f1p0/2057	2057	no ORF	N/A	0	none	unmapped	N/A	N/A	N/A	N/A
c28847/f1p0/1303	1299	no ORF	N/A	11.4674	none	unmapped	N/A	N/A	N/A	N/A
c28889/f1p0/1325	1294	no ORF	N/A	1.28856	Motif:GA-rich,Motif:(GGC)n	unmapped	N/A	N/A	N/A	N/A
c28908/f1p0/3153	3063	no ORF	N/A	0	Motif:(A)n	unmapped	N/A	N/A	N/A	N/A
c28961/f1p1/3306	3316	no ORF	N/A	1.0622	Motif:(TCTCTC)n,Motif:RLG_scTat_4_1-I,Motif:Gypsy-93_ZM-LTR	unmapped	N/A	N/A	N/A	N/A
c2913/f1p0/1516	1426	no ORF	N/A	0.39991	Motif:G-rich,Motif:(CGGAAG)n	unmapped	N/A	N/A	N/A	N/A
c29319/f1p0/3004	3004	no ORF	N/A	0	none	unmapped	N/A	N/A	N/A	N/A
c29566/f1p0/4698	4654	no ORF	N/A	0	Motif:(T)n,Motif:(CT)n,Motif:(CTTTT)n	unmapped	N/A	N/A	N/A	N/A
c29816/f1p2/1187	1188	no ORF	N/A	64.9761	Motif:G-rich,Motif:MuDR1_HV	unmapped	N/A	N/A	N/A	N/A
c29831/f2p0/2434	2464	no ORF	N/A	0.832162	none	unmapped	N/A	N/A	N/A	N/A
c29862/f1p0/1219	1239	no ORF	N/A	0.282987	none	unmapped	N/A	N/A	N/A	N/A
c30058/f1p0/2170	2176	no ORF	N/A	0.777179	Motif:Copia-69_SB-LTR,Motif:(TA)n	unmapped	N/A	N/A	N/A	N/A
c30141/f1p0/2068	2091	no ORF	N/A	1.30944	none	unmapped	N/A	N/A	N/A	N/A
c30250/f1p0/1724	1717	no ORF	N/A	0.211059	none	unmapped	N/A	N/A	N/A	N/A
c30524/f1p0/2041	2024	no ORF	N/A	0	Motif:(A)n	unmapped	N/A	N/A	N/A	N/A
c30525/f1p0/1058	1057	no ORF	N/A	6.27548	Motif:(CACCGCA)n,Motif:STOWAWAY2_SB	unmapped	N/A	N/A	N/A	N/A
c30568/f1p0/1833	1960	no ORF	N/A	0.0726016	Motif:(TGGATT)n,Motif:(TGATA)n	unmapped	N/A	N/A	N/A	N/A
c30619/f1p0/1084	1085	no ORF	N/A	0.0185554	Motif:(TGTAA)n	unmapped	N/A	N/A	N/A	N/A
c30886/f1p1/1240	1240	no ORF	N/A	0.570476	Motif:EnSpm-41N_SBi	unmapped	N/A	N/A	N/A	N/A
c30927/f1p0/1678	1678	no ORF	N/A	0	none	unmapped	N/A	N/A	N/A	N/A
c30973/f1p0/1106	1111	no ORF	N/A	2.13597	none	unmapped	N/A	N/A	N/A	N/A
c3098/f1p0/3641	3634	no ORF	N/A	0	Motif:(T)n	unmapped	N/A	N/A	N/A	N/A
c31116/f1p0/1264	1264	no ORF	N/A	2.85727	Motif:Gypsy-126_SBi-LTR,Motif:Gypsy-137_SBi-LTR	unmapped	N/A	N/A	N/A	N/A
c31123/f1p6/1338	1338	no ORF	N/A	3.14854	Motif:G-rich	unmapped	N/A	N/A	N/A	N/A
c31616/f1p0/1702	1702	no ORF	N/A	0	Motif:(GTCGAGC)n	unmapped	N/A	N/A	N/A	N/A
c31646/f1p0/1422	1426	no ORF	N/A	0.0218892	Motif:(GCT)n	unmapped	N/A	N/A	N/A	N/A
c32180/f1p0/1355	1354	no ORF	N/A	1.23149	none	unmapped	N/A	N/A	N/A	N/A
c32371/f1p0/1538	1540	no ORF	N/A	1.04599	none	unmapped	N/A	N/A	N/A	N/A
c32700/f1p0/1154	1154	no ORF	N/A	4.51103	Motif:(CGCA)n,Motif:hAT-N15_ZM,Motif:Gypsy-125N_SBi-LTR	unmapped	N/A	N/A	N/A	N/A
c32891/f1p0/1182	1185	no ORF	N/A	0.0972966	Motif:GA-rich	unmapped	N/A	N/A	N/A	N/A
c33114/f1p0/1319	1319	no ORF	N/A	2.00689	none	unmapped	N/A	N/A	N/A	N/A
c3358/f1p0/1060	1061	no ORF	N/A	2.9439	none	unmapped	N/A	N/A	N/A	N/A
c34650/f1p0/3673	3678	no ORF	N/A	0.125155	Motif:(CACG)n,Motif:Gypsy-125N_SBi-LTR	unmapped	N/A	N/A	N/A	N/A
c34714/f1p0/1100	1102	no ORF	N/A	0	none	unmapped	N/A	N/A	N/A	N/A
c3539/f1p0/4198	4178	no ORF	N/A	0	none	unmapped	N/A	N/A	N/A	N/A
c35524/f1p0/1007	1007	no ORF	N/A	19.5083	Motif:Gypsy-125N_SBi-LTR	unmapped	N/A	N/A	N/A	N/A
c35527/f1p1/955	955	no ORF	N/A	1.20641	Motif:LTR-1_SBi	unmapped	N/A	N/A	N/A	N/A
c3555/f1p0/2498	2483	no ORF	N/A	0.480062	none	unmapped	N/A	N/A	N/A	N/A
c35551/f1p0/1389	1401	no ORF	N/A	0.13277	Motif:(TCGCCG)n,Motif:NonLTR-1_SBi	unmapped	N/A	N/A	N/A	N/A
c35596/f1p2/1131	1131	no ORF	N/A	10.5705	Motif:LTR-1_SBi	unmapped	N/A	N/A	N/A	N/A
c3608/f1p0/457	459	no ORF	N/A	0	none	unmapped	N/A	N/A	N/A	N/A
c36106/f1p0/3699	3769	no ORF	N/A	1.20187	Motif:(CGC)n,Motif:Helitron-N16_SBi,Motif:EnSpm-29_SBi	unmapped	N/A	N/A	N/A	N/A
c36151/f1p0/1944	1950	no ORF	N/A	0.633428	none	unmapped	N/A	N/A	N/A	N/A
c36341/f1p0/1698	1686	no ORF	N/A	0.452086	Motif:STOWAWAY12_SB	unmapped	N/A	N/A	N/A	N/A
c36604/f1p0/1260	1259	no ORF	N/A	0.0645087	Motif:RLG_scTat_4_1-I,Motif:Gypsy-93_ZM-LTR,Motif:(AGGATTA)n	mapped	intergenic	Chr03	48981561	48982790
c37058/f1p0/4058	4053	no ORF	N/A	0	none	unmapped	N/A	N/A	N/A	N/A
c37153/f1p0/1287	1295	no ORF	N/A	0.652951	Motif:LINE1-29_SBi,Motif:Gypsy-139_SBi-I,Motif:Gypsy-126_SBi-LTR	unmapped	N/A	N/A	N/A	N/A
c37365/f1p0/1319	1318	no ORF	N/A	0.718254	none	unmapped	N/A	N/A	N/A	N/A
c37415/f1p0/1327	1307	no ORF	N/A	0.348097	Motif:Gypsy-125N_SBi-LTR	unmapped	N/A	N/A	N/A	N/A
c37540/f2p2/2460	2458	no ORF	N/A	2.78245	Motif:(CGC)n,Motif:(TCCTC)n	unmapped	N/A	N/A	N/A	N/A
c37946/f1p0/1436	1400	no ORF	N/A	0	Motif:(GAGGT)n	unmapped	N/A	N/A	N/A	N/A
c38020/f1p0/1527	1525	no ORF	N/A	0.0423129	none	unmapped	N/A	N/A	N/A	N/A
c3804/f1p0/1243	1272	no ORF	N/A	0.0748597	none	unmapped	N/A	N/A	N/A	N/A
c38138/f1p0/1035	1035	no ORF	N/A	3.38462	Motif:(GCG)n,Motif:HARB-N3_SBi	unmapped	N/A	N/A	N/A	N/A
c38209/f1p1/1409	1409	no ORF	N/A	10.6265	Motif:Gypsy-N129_SBi-LTR,Motif:Gypsy-139_SBi-LTR	unmapped	N/A	N/A	N/A	N/A
c3834/f1p0/1096	1086	no ORF	N/A	0.44071	Motif:STOWAWAY2_SB	unmapped	N/A	N/A	N/A	N/A
c38407/f1p1/1108	1106	no ORF	N/A	9.61977	none	unmapped	N/A	N/A	N/A	N/A
c38648/f1p0/2413	2409	no ORF	N/A	1.49903	none	unmapped	N/A	N/A	N/A	N/A
c38676/f1p0/1174	1176	no ORF	N/A	0.770382	none	unmapped	N/A	N/A	N/A	N/A
c38715/f1p0/1471	1471	no ORF	N/A	0	Motif:(TTTCC)n	unmapped	N/A	N/A	N/A	N/A
c38827/f1p2/2272	2272	no ORF	N/A	0.471578	none	unmapped	N/A	N/A	N/A	N/A
c39155/f1p3/1197	1197	no ORF	N/A	120.978	none	unmapped	N/A	N/A	N/A	N/A
c39178/f1p1/2653	2651	no ORF	N/A	1.53047	Motif:(CTCTC)n	unmapped	N/A	N/A	N/A	N/A
c39325/f1p0/2330	2330	no ORF	N/A	0	none	unmapped	N/A	N/A	N/A	N/A
c39877/f1p1/2589	2591	no ORF	N/A	0.40128	none	unmapped	N/A	N/A	N/A	N/A
c40418/f1p0/4065	4065	no ORF	N/A	0	Motif:(T)n	unmapped	N/A	N/A	N/A	N/A
c42046/f1p0/544	544	no ORF	N/A	0	none	unmapped	N/A	N/A	N/A	N/A
c4231/f1p0/1184	1178	no ORF	N/A	0.512715	Motif:(ATGT)n	unmapped	N/A	N/A	N/A	N/A
c42968/f1p0/2160	2167	no ORF	N/A	0.372611	Motif:(CTCTG)n,Motif:(CTCTCC)n,Motif:(TTAA)n,Motif:A-rich	unmapped	N/A	N/A	N/A	N/A
c42972/f1p0/4031	3987	no ORF	N/A	0.0151487	none	unmapped	N/A	N/A	N/A	N/A
c43037/f1p0/2743	2744	no ORF	N/A	1.23609	Motif:(CCCTCT)n,Motif:Gypsy-6_SB-LTR	unmapped	N/A	N/A	N/A	N/A
c44243/f1p1/2108	2108	no ORF	N/A	1.42678	none	unmapped	N/A	N/A	N/A	N/A
c44375/f1p0/1150	1140	no ORF	N/A	9.73078	Motif:(CCG)n,Motif:(CCCT)n,Motif:(GGC)n	unmapped	N/A	N/A	N/A	N/A
c4635/f1p0/5953	5953	no ORF	N/A	0.0101458	none	unmapped	N/A	N/A	N/A	N/A
c47459/f1p0/361	361	no ORF	N/A	0	none	unmapped	N/A	N/A	N/A	N/A
c5103/f1p0/1073	1073	no ORF	N/A	4.06855	none	unmapped	N/A	N/A	N/A	N/A
c5672/f1p0/1341	1289	no ORF	N/A	1.78338	none	unmapped	N/A	N/A	N/A	N/A
c5852/f1p0/2240	2238	no ORF	N/A	0.633116	Motif:(TAA)n,Motif:RLG_scTat_4_1-I,Motif:Gypsy-93_ZM-LTR	unmapped	N/A	N/A	N/A	N/A
c5867/f1p0/1431	1394	no ORF	N/A	0.205183	Motif:NonLTR-1_SBi	unmapped	N/A	N/A	N/A	N/A
c6038/f1p0/1320	1319	no ORF	N/A	1.253	Motif:(GTGCGGT)n,Motif:STOWAWAY13_SB,Motif:STOWAWAY12_SB	unmapped	N/A	N/A	N/A	N/A
c6118/f1p0/2581	2510	no ORF	N/A	0.0164802	Motif:(T)n,Motif:(CTCTA)n	unmapped	N/A	N/A	N/A	N/A
c6370/f1p1/1170	1169	no ORF	N/A	1.4157	Motif:(TTCT)n	unmapped	N/A	N/A	N/A	N/A
c6470/f1p0/1290	1290	no ORF	N/A	0	none	unmapped	N/A	N/A	N/A	N/A
c6601/f1p0/894	905	no ORF	N/A	0.244706	none	unmapped	N/A	N/A	N/A	N/A
c7043/f1p0/861	861	no ORF	N/A	1.20703	Motif:LTR-1_SBi	unmapped	N/A	N/A	N/A	N/A
c7155/f1p0/1061	1062	no ORF	N/A	1.97156	Motif:RLG_scTat_2_1-I	unmapped	N/A	N/A	N/A	N/A
c7384/f2p1/1465	1464	no ORF	N/A	3.62331	none	unmapped	N/A	N/A	N/A	N/A
c7459/f1p0/1391	1388	no ORF	N/A	0.600051	none	unmapped	N/A	N/A	N/A	N/A
c7565/f1p0/3603	3580	no ORF	N/A	0.532234	Motif:(GCCTT)n,Motif:(TA)n,Motif:RLG_scTat_4_1-I,Motif:Gypsy-93_ZM-LTR,Motif:(AGGATTA)n	unmapped	N/A	N/A	N/A	N/A
c7610/f1p0/874	877	no ORF	N/A	11.2938	Motif:(CTAGAT)n	unmapped	N/A	N/A	N/A	N/A
c8054/f1p0/1822	1865	no ORF	N/A	0.277067	none	unmapped	N/A	N/A	N/A	N/A
c8118/f1p0/2223	2223	no ORF	N/A	0	none	unmapped	N/A	N/A	N/A	N/A
c8291/f1p3/1219	1223	no ORF	N/A	6.25876	Motif:GA-rich	unmapped	N/A	N/A	N/A	N/A
c8756/f2p4/3350	3355	no ORF	N/A	1.43094	Motif:(CTCT)n,Motif:(TTAGTAA)n,Motif:(TAA)n,Motif:RLG_scTat_4_1-I,Motif:Gypsy-93_ZM-LTR	unmapped	N/A	N/A	N/A	N/A
c8761/f1p0/6730	6730	no ORF	N/A	0	Motif:(T)n	unmapped	N/A	N/A	N/A	N/A
c8935/f1p0/907	907	no ORF	N/A	0	Motif:(AAGA)n	unmapped	N/A	N/A	N/A	N/A
c9061/f1p0/1385	1389	no ORF	N/A	1.30665	none	unmapped	N/A	N/A	N/A	N/A
c9153/f1p0/1365	1409	no ORF	N/A	0.466699	Motif:NonLTR-1_SBi	unmapped	N/A	N/A	N/A	N/A
c9281/f1p0/1160	1160	no ORF	N/A	1.46584	none	unmapped	N/A	N/A	N/A	N/A
