# Supplementary material for: Uncovering full-length transcript isoforms of sugarcane cultivar Khon Kaen 3 using single-molecule long-read sequencing
Source: PeerJ. 2018 Oct 30;6:e5818. doi: 10.7717/peerj.5818 (PMC6214230; doi:10.7717/peerj.5818)
Supplement: Table S5 — The number of mapped transcripts are shown for each GO, KOG, and KEGG category. [file peerj-06-5818-s005.xlsx]

## Sheet: GO
Second-level GO terms
Gene Ontology
Cellular component		Molecular function		Biological process
cell	1711	binding	6854	metabolic process	6090
cell part	1711	catalytic activity	5956	cellular process	4962
membrane	1645	transporter activity	670	localization	1219
organelle	1206	transcription regulator activity	350	biological regulation	1167
membrane part	955	structural molecule activity	184	regulation of biological process	1106
macromolecular complex	824	antioxidant activity	75	response to stimulus	620
organelle part	508	molecular function regulator	75	cellular component organization or biogenesis	358
membrane-enclosed lumen	107	signal transducer activity	52	signaling	208
supramolecular complex	23	molecular transducer activity	37	multicellular organismal process	92
extracellular region	13	molecular carrier activity	2	multi-organism process	65
extracellular region part	5	nutrient reservoir activity	1	reproductive process	63
obsolete Stn1-Ten1 complex	1	obsolete gamma-glutamyltransferase activity	1	reproduction	63
				negative regulation of biological process	62
				developmental process	37
				positive regulation of biological process	25
				growth	7
				immune system process	6
				rhythmic process	4
				cell proliferation	3
				biological adhesion	2
				detoxification	1
				nitrogen utilization	1
Third-level GO terms
Gene Ontology
Cellular component		Molecular function		Biological process
membrane	4765	protein binding	12024	protein phosphorylation	6386
integral component of membrane	4487	ATP binding	11909	oxidation-reduction process	4474
nucleus	3041	protein kinase activity	6377	transmembrane transport	3435
intracellular	767	DNA binding	4390	regulation of transcription, DNA-templated	3257
cytoplasm	708	zinc ion binding	3854	transport	2162
1,3-beta-D-glucan synthase complex	528	nucleic acid binding	3224	metabolic process	2146
ribosome	403	ADP binding	2393	proteolysis	1466
myosin complex	258	ATPase activity	2185	tricarboxylic acid cycle	1446
membrane coat	239	oxidoreductase activity	2151	carbon fixation	1367
mediator complex	230	catalytic activity	2138	intracellular protein transport	1205
kinesin complex	207	metal ion binding	2073	carbohydrate metabolic process	1196
spliceosomal complex	206	hydrolase activity	1631	transcription, DNA-templated	906
clathrin coat of trans-Golgi network vesicle	202	nucleotide binding	1439	protein folding	867
clathrin coat of coated pit	202	phosphoenolpyruvate carboxylase activity	1364	vesicle-mediated transport	758
COPI vesicle coat	184	RNA binding	1340	response to stress	650
photosystem II	165	DNA binding transcription factor activity	1178	biosynthetic process	603
nuclear pore	151	ATPase activity, coupled to transmembrane movement of substances	1082	DNA repair	550
chromosome	151	GTP binding	998	phosphatidylinositol metabolic process	544
photosystem II oxygen evolving complex	147	transporter activity	910	(1->3)-beta-D-glucan biosynthetic process	528
exocyst	138	ubiquitin-protein transferase activity	814	signal transduction	528
endoplasmic reticulum	129	sequence-specific DNA binding	798	protein dephosphorylation	523
extrinsic component of membrane	129	heme binding	753	glycolytic process	501
COPII vesicle coat	119	hydrolase activity, hydrolyzing O-glycosyl compounds	672	lipid metabolic process	469
nucleosome	108	kinase activity	650	phosphorylation	461
protein phosphatase type 2A complex	100	protein dimerization activity	644	translation	427
DNA-directed RNA polymerase II, core complex	98	unfolded protein binding	609	protein ubiquitination	425
peroxisome	97	iron ion binding	600	tRNA aminoacylation for protein translation	412
plasma membrane	86	phosphatidylinositol phosphate kinase activity	544	pyruvate metabolic process	393
mitochondrion	83	1,3-beta-D-glucan synthase activity	528	photosynthesis, light harvesting	365
microtubule	83	oxidoreductase activity, acting on paired donors, with incorporation or reduction of molecular oxygen	507	phosphorelay signal transduction system	341
endoplasmic reticulum membrane	82	methyltransferase activity	497	photosynthesis	335
Ino80 complex	82	NAD binding	483	cell redox homeostasis	335
nuclear chromosome	76	magnesium ion binding	477	cation transport	325
clathrin adaptor complex	64	aminoacyl-tRNA ligase activity	437	response to hormone	307
proteasome core complex	61	transferase activity, transferring phosphorus-containing groups	432	regulation of transcription from RNA polymerase II promoter	289
cohesin complex	59	structural molecule activity	429	fatty acid biosynthetic process	287
proton-transporting ATP synthase complex, catalytic core F(1)	58	calcium ion binding	426	RNA processing	282
proton-transporting two-sector ATPase complex, catalytic domain	55	phosphotransferase activity, alcohol group as acceptor	413	nitrogen compound metabolic process	269
cytoskeleton	54	pyridoxal phosphate binding	413	response to oxidative stress	258
Cdc73/Paf1 complex	54	structural constituent of ribosome	410	DNA recombination	255
photosystem I	50	protein serine/threonine phosphatase activity	407	mRNA splicing, via spliceosome	252
TORC1 complex	50	pyruvate, phosphate dikinase activity	393	potassium ion transmembrane transport	223
spindle pole	49	serine-type endopeptidase activity	384	phospholipid biosynthetic process	221
microtubule organizing center	49	metalloendopeptidase activity	347	sucrose metabolic process	219
eukaryotic translation initiation factor 3 complex	48	chromatin binding	344	ubiquitin-dependent protein catabolic process	218
beta-galactosidase complex	47	transferase activity, transferring hexosyl groups	334	microtubule-based movement	209
PAS complex	44	phosphoric ester hydrolase activity	325	drug transmembrane transport	197
Golgi membrane	43	transcription cofactor activity	321	metal ion transport	193
WASH complex	42	oxidoreductase activity, acting on the CH-OH group of donors, NAD or NADP as acceptor	315	tRNA aminoacylation	193
SAGA complex	40	nucleotidyltransferase activity	307	recognition of pollen	192
core TFIIH complex	39	carbonate dehydratase activity	304	protein metabolic process	189
transcriptional repressor complex	38	helicase activity	304	inositol biosynthetic process	186
ER membrane protein complex	36	polysaccharide binding	304	regulation of ARF protein signal transduction	186
photosystem I reaction center	35	coenzyme binding	295	nucleobase-containing compound metabolic process	185
proton-transporting V-type ATPase, V0 domain	35	DNA-directed 5'-3' RNA polymerase activity	290	amino acid transmembrane transport	183
integral component of peroxisomal membrane	34	ionotropic glutamate receptor activity	290	ion transport	172
chloroplast	34	microtubule binding	284	DNA-templated transcription, initiation	169
zeta DNA polymerase complex	34	calmodulin binding	282	protein glycosylation	167
Golgi transport complex	34	GTPase activity	274	sphingolipid metabolic process	164
thylakoid membrane	34	transmembrane transporter activity	274	phospholipid transport	163
peroxisomal membrane	33	chaperone binding	271	mRNA processing	162
proteasome core complex, alpha-subunit complex	32	iron-sulfur cluster binding	259	sulfate transport	161
GPI-anchor transamidase complex	32	motor activity	258	protein transport	153
ubiquitin ligase complex	31	carbohydrate binding	250	cellulose biosynthetic process	151
cis-Golgi network	31	solute:proton antiporter activity	238	vacuole organization	146
phosphopyruvate hydratase complex	30	four-way junction helicase activity	234	trehalose biosynthetic process	143
U1 snRNP	30	electron carrier activity	233	ER to Golgi vesicle-mediated transport	139
signal recognition particle	29	transferase activity, transferring glycosyl groups	233	posttranslational protein targeting to membrane, translocation	137
NuA4 histone acetyltransferase complex	27	RNA polymerase II transcription cofactor activity	227	DNA replication	135
transcription factor TFIIIB complex	26	oxidoreductase activity, acting on the aldehyde or oxo group of donors, NAD or NADP as acceptor	227	chromatin remodeling	135
transcription factor TFIID complex	26	lipid binding	224	ATP hydrolysis coupled proton transport	135
mitochondrial inner membrane	26	potassium ion transmembrane transporter activity	223	steroid biosynthetic process	131
AP-3 adaptor complex	25	transferase activity, transferring acyl groups other than amino-acyl groups	221	tRNA processing	127
mitochondrial outer membrane	23	sucrose synthase activity	219	phosphatidylinositol-3-phosphate biosynthetic process	127
SAGA-type complex	23	histone binding	216	COPII vesicle coating	126
large ribosomal subunit	22	microtubule motor activity	209	microtubule cytoskeleton organization	119
small-subunit processome	21	malate dehydrogenase (decarboxylating) (NAD+) activity	209	polysaccharide catabolic process	119
mitochondrial proton-transporting ATP synthase complex, catalytic core F(1)	20	serine-type peptidase activity	204	glutamate biosynthetic process	119
signal recognition particle receptor complex	20	Ran GTPase binding	200	histone lysine methylation	119
actin filament	20	protein transporter activity	200	exocytosis	116
Arp2/3 protein complex	20	aspartic-type endopeptidase activity	198	phosphatidylinositol phosphorylation	116
chromosome, centromeric region	19	hydrolase activity, acting on ester bonds	198	chromosome organization	111
F-actin capping protein complex	19	peroxidase activity	197	chloride transport	110
outer membrane	19	drug transmembrane transporter activity	197	potassium ion transport	106
cell wall	18	antiporter activity	197	carboxylic acid metabolic process	105
proteasome regulatory particle, base subcomplex	18	fructose-bisphosphate aldolase activity	189	cell cycle	103
proton-transporting V-type ATPase, V1 domain	18	inositol-3-phosphate synthase activity	186	small GTPase mediated signal transduction	103
mitochondrial inner membrane presequence translocase complex	17	ARF guanyl-nucleotide exchange factor activity	186	transcription from RNA polymerase II promoter	101
mRNA cleavage and polyadenylation specificity factor complex	17	small protein activating enzyme activity	186	protein peptidyl-prolyl isomerization	99
Piccolo NuA4 histone acetyltransferase complex	17	magnesium chelatase activity	186	guanosine tetraphosphate metabolic process	99
HAUS complex	17	cysteine-type peptidase activity	180	proton transport	99
anaphase-promoting complex	16	oxidoreductase activity, acting on single donors with incorporation of molecular oxygen, incorporation of two atoms of oxygen	176	vesicle docking involved in exocytosis	98
U4/U6 x U5 tri-snRNP complex	16	phosphogluconate dehydrogenase (decarboxylating) activity	175	isoprenoid biosynthetic process	98
proton-transporting two-sector ATPase complex, proton-transporting domain	15	ligase activity, forming aminoacyl-tRNA and related compounds	168	alanyl-tRNA aminoacylation	96
nuclear chromosome, telomeric region	14	glucosylceramidase activity	164	glycerol ether metabolic process	95
DNA replication factor C complex	14	phospholipid-translocating ATPase activity	163	protein deubiquitination	95
actin cytoskeleton	14	secondary active sulfate transmembrane transporter activity	161	arsenite transport	91
mRNA cleavage factor complex	13	sulfate transmembrane transporter activity	161	RNA polyadenylation	91
vacuolar proton-transporting V-type ATPase, V1 domain	12	ion channel activity	160	ATP synthesis coupled proton transport	89
transcription factor complex	12	starch binding	157	translational elongation	87
oligosaccharyltransferase complex	12	LIM domain binding	156	cellular amino acid metabolic process	87
Smc5-Smc6 complex	12	hydrolase activity, acting on acid anhydrides, in phosphorus-containing anhydrides	149	phosphatidylinositol-mediated signaling	85
nuclear cap binding complex	11	ribonuclease III activity	148	nucleosome assembly	84
apoplast	11	flavin adenine dinucleotide binding	146	histone acetylation	84
kinetochore	10	protein disulfide oxidoreductase activity	144	gluconeogenesis	83
small ribosomal subunit	10	cellulose synthase (UDP-forming) activity	144	cytoskeleton organization	83
integrator complex	10	phosphorelay sensor kinase activity	142	microtubule-based process	81
extracellular space	9	NADP binding	139	terpenoid biosynthetic process	79
protein kinase CK2 complex	9	aldehyde-lyase activity	136	regulation of cyclin-dependent protein serine/threonine kinase activity	78
retromer complex	9	acetyl-CoA carboxylase activity	134	autophagy	76
mismatch repair complex	9	transferase activity	133	spermidine biosynthetic process	76
AP-5 adaptor complex	9	oxidoreductase activity, acting on the CH-NH2 group of donors	126	intracellular signal transduction	75
DNA-directed RNA polymerase III complex	8	3'-5' exonuclease activity	125	multicellular organism development	71
Golgi apparatus	8	histone-lysine N-methyltransferase activity	122	tetrapyrrole biosynthetic process	71
integral component of Golgi membrane	8	thiamine pyrophosphate binding	122	cytokinesis	70
proteasome complex	6	glutamate synthase activity	119	DNA topological change	70
origin recognition complex	6	beta-amylase activity	119	nucleotide-excision repair	70
nuclear origin of replication recognition complex	6	endoribonuclease activity, producing 5'-phosphomonoesters	119	translational initiation	70
heterotrimeric G-protein complex	6	inorganic diphosphatase activity	118	rRNA processing	69
checkpoint clamp complex	6	transferase activity, transferring acyl groups	116	valyl-tRNA aminoacylation	69
Elongator holoenzyme complex	6	histone acetyltransferase activity	115	mismatch repair	67
condensin complex	5	amino acid binding	111	glutamine biosynthetic process	67
gamma-tubulin complex	5	3-beta-hydroxy-delta5-steroid dehydrogenase activity	110	fatty acid metabolic process	67
transcription factor TFIIA complex	5	cation binding	109	phosphate-containing compound metabolic process	67
nucleolus	5	exonuclease activity	106	protein import into nucleus	66
mitochondrial respiratory chain complex III	5	voltage-gated chloride channel activity	105	cellular amino acid biosynthetic process	65
spindle	5	translation initiation factor activity	102	sodium ion transport	64
cytosol	5	protein tyrosine/serine/threonine phosphatase activity	102	protein kinase C-activating G-protein coupled receptor signaling pathway	63
proteasome regulatory particle	5	O-methyltransferase activity	101	defense response	61
eukaryotic translation elongation factor 1 complex	5	2 iron, 2 sulfur cluster binding	101	lipid biosynthetic process	61
molybdopterin synthase complex	5	FMN binding	100	methionine biosynthetic process	61
anchored component of membrane	5	protein phosphatase regulator activity	100	protein catabolic process	61
methylosome	5	peptidyl-prolyl cis-trans isomerase activity	99	proteolysis involved in cellular protein catabolic process	61
pICln-Sm protein complex	5	translation elongation factor activity	98	glycine catabolic process	60
anchored component of plasma membrane	5	6-phosphofructokinase activity	97	NADP biosynthetic process	59
nuclear exosome (RNase complex)	4	DNA-directed DNA polymerase activity	97	mitotic sister chromatid cohesion	59
eukaryotic translation initiation factor 2 complex	4	alanine-tRNA ligase activity	96	glutamine metabolic process	58
protein farnesyltransferase complex	4	U6 snRNA binding	96	fructose metabolic process	57
BBSome	4	U5 snRNA binding	96	fructose 2,6-bisphosphate metabolic process	57
MCM complex	4	metallopeptidase activity	95	mannose metabolic process	57
exosome (RNase complex)	3	signal transducer activity	92	fatty acid beta-oxidation	57
mitochondrial proton-transporting ATP synthase complex, coupling factor F(o)	3	oxidoreductase activity, acting on the aldehyde or oxo group of donors, disulfide as acceptor	92	phototropism	57
integral component of nuclear inner membrane	3	polynucleotide adenylyltransferase activity	91	IMP salvage	55
small nucleolar ribonucleoprotein complex	3	arsenite transmembrane transporter activity	91	posttranscriptional gene silencing by RNA	55
mitochondrial envelope	3	phospholipid binding	90	histone modification	54
signal peptidase complex	3	heat shock protein binding	88	malate metabolic process	53
microtubule associated complex	3	O-acyltransferase activity	87	cell growth	53
thylakoid	3	transaminase activity	87	chromatin organization	53
prefoldin complex	3	actin binding	86	spermine biosynthetic process	52
CCR4-NOT complex	3	GTPase activator activity	86	SRP-dependent cotranslational protein targeting to membrane	52
Mre11 complex	3	copper ion binding	86	telomere maintenance	51
Mpp10 complex	3	proton-transporting ATP synthase activity, rotational mechanism	85	TOR signaling	50
Ku70:Ku80 complex	3	thiol-dependent ubiquitinyl hydrolase activity	84	gene silencing by RNA	49
signal recognition particle, chloroplast targeting	3	proton-transporting ATPase activity, rotational mechanism	83	vacuolar transport	48
ribonuclease MRP complex	2	N-acetyltransferase activity	82	protein sumoylation	48
extracellular region	2	serine-type exopeptidase activity	82	cellular response to extracellular stimulus	48
transcription factor TFIIF complex	2	hydrolase activity, acting on acid anhydrides	81	ATP metabolic process	48
mitochondrial respiratory chain complex IV	2	protein kinase binding	78	galactose metabolic process	47
mitochondrial matrix	2	FAD binding	78	RNA modification	47
integral component of plasma membrane	2	NAD+ ADP-ribosyltransferase activity	77	protein import	47
ribonuclease P complex	2	ATP-dependent peptidase activity	77	pseudouridine synthesis	46
H4/H2A histone acetyltransferase complex	2	serine-type carboxypeptidase activity	77	regulation of lipid kinase activity	44
ATP-binding cassette (ABC) transporter complex	2	oxoglutarate dehydrogenase (succinyl-transferring) activity	77	protein insertion into membrane	43
histone acetyltransferase complex	1	acyl-CoA dehydrogenase activity	75	ribosome biogenesis	42
THO complex part of transcription export complex	1	protein serine/threonine kinase activity	75	heme biosynthetic process	41
mitochondrial outer membrane translocase complex	1	acetylglucosaminyltransferase activity	74	detection of visible light	41
mitochondrial intermembrane space	1	double-stranded DNA binding	73	iron-sulfur cluster assembly	41
vacuolar membrane	1	glutamate-ammonia ligase activity	73	protein-chromophore linkage	41
endoplasmic reticulum lumen	1	hydrolase activity, acting on carbon-nitrogen (but not peptide) bonds	73	coenzyme A biosynthetic process	40
Golgi stack	1	deaminase activity	73	L-arabinose metabolic process	40
katanin complex	1	glycopeptide alpha-N-acetylgalactosaminidase activity	73	GPI anchor biosynthetic process	39
riboflavin synthase complex	1	ATP-dependent DNA helicase activity	72	S-adenosylmethionine biosynthetic process	39
cytochrome b6f complex	1	amino acid transmembrane transporter activity	70	GPI anchor metabolic process	38
small nuclear ribonucleoprotein complex	1	pyruvate kinase activity	69	magnesium ion transport	38
extracellular matrix	1	valine-tRNA ligase activity	69	actin cytoskeleton organization	38
mitochondrial membrane	1	thiol-dependent ubiquitin-specific protease activity	69	retrograde transport, endosome to Golgi	38
proton-transporting ATP synthase complex, coupling factor F(o)	1	hydrogen ion transmembrane transporter activity	69	glucose metabolic process	37
box H/ACA RNP complex	1	potassium ion binding	69	retrograde vesicle-mediated transport, Golgi to ER	37
		protein domain specific binding	67	chlorophyll biosynthetic process	37
		ubiquitin protein ligase binding	67	photosystem II stabilization	37
		mismatched DNA binding	66	anion transport	36
		lyase activity	65	photosystem II assembly	36
		phosphatidylinositol binding	64	organic substance metabolic process	35
		diacylglycerol kinase activity	63	nuclear-transcribed mRNA catabolic process, nonsense-mediated decay	34
		transferase activity, transferring alkyl or aryl (other than methyl) groups	63	folic acid-containing compound biosynthetic process	34
		nuclease activity	62	translesion synthesis	34
		5-methyltetrahydropteroyltriglutamate-homocysteine S-methyltransferase activity	61	7-methylguanosine mRNA capping	33
		threonine-type endopeptidase activity	61	iron ion transport	33
		hydrolase activity, acting on acid anhydrides, catalyzing transmembrane movement of substances	61	cellular iron ion homeostasis	33
		glycine dehydrogenase (decarboxylating) activity	60	protein import into peroxisome matrix, docking	33
		nucleobase-containing compound kinase activity	60	cell wall macromolecule catabolic process	33
		NAD+ kinase activity	59	coenzyme A metabolic process	32
		glucose-6-phosphate isomerase activity	59	Golgi vesicle transport	32
		sigma factor activity	59	pyrimidine nucleotide biosynthetic process	31
		fructose 1,6-bisphosphate 1-phosphatase activity	59	transcription elongation from RNA polymerase II promoter	31
		GDP-D-glucose phosphorylase activity	59	cellular ion homeostasis	31
		alpha-mannosidase activity	58	nitrate assimilation	31
		oxidoreductase activity, acting on the CH-CH group of donors	58	chitin catabolic process	30
		metal ion transmembrane transporter activity	58	mRNA polyadenylation	30
		6-phosphofructo-2-kinase activity	57	nucleoside metabolic process	30
		acyl-CoA oxidase activity	57	riboflavin biosynthetic process	30
		cation transmembrane transporter activity	57	ATP-dependent chromatin remodeling	30
		galactosyltransferase activity	57	mRNA splice site selection	29
		mannosidase activity	57	regulation of DNA-templated transcription, elongation	29
		intramolecular transferase activity, phosphotransferases	57	vitamin B6 biosynthetic process	29
		4-alpha-glucanotransferase activity	56	pyridoxal phosphate biosynthetic process	29
		phosphoglycerate kinase activity	56	histidine biosynthetic process	28
		AMP deaminase activity	55	response to wounding	28
		catalase activity	55	lipid glycosylation	28
		SUMO transferase activity	54	jasmonic acid metabolic process	27
		damaged DNA binding	53	induced systemic resistance, jasmonic acid mediated signaling pathway	27
		UDP-glucose:glycoprotein glucosyltransferase activity	53	methylation	27
		malate dehydrogenase activity	53	regulation of sequence-specific DNA binding transcription factor activity	27
		ribonucleoside binding	53	transcription initiation from RNA polymerase III promoter	26
		adenosylmethionine decarboxylase activity	52	developmental process	26
		molybdenum ion binding	52	histone H3 acetylation	26
		polygalacturonate 4-alpha-galacturonosyltransferase activity	52	regulation of DNA methylation	26
		hydrogen-translocating pyrophosphatase activity	51	cysteine biosynthetic process from serine	25
		chlorophyllide a oxygenase [overall] activity	51	G-protein coupled receptor signaling pathway	25
		tRNA binding	49	attachment of GPI anchor to protein	25
		uridylyltransferase activity	49	protein prenylation	25
		3-hydroxyacyl-CoA dehydrogenase activity	48	iron ion transmembrane transport	25
		RNA-directed 5'-3' RNA polymerase activity	48	glycolipid transport	25
		ATP:ADP antiporter activity	48	phenylalanyl-tRNA aminoacylation	24
		carboxy-lyase activity	48	arginine catabolic process	24
		4-hydroxy-3-methylbut-2-en-1-yl diphosphate synthase activity	48	intra-Golgi vesicle-mediated transport	24
		acid phosphatase activity	47	peroxisome organization	24
		beta-galactosidase activity	47	purine nucleotide biosynthetic process	23
		endonuclease activity	46	cellular protein modification process	23
		phosphoric diester hydrolase activity	46	RNA splicing	23
		DNA topoisomerase type I activity	45	aromatic amino acid family biosynthetic process	23
		oxidoreductase activity, acting on paired donors, with incorporation or reduction of molecular oxygen, 2-oxoglutarate as one donor, and incorporation of one atom each of oxygen into both donors	45	branched-chain amino acid biosynthetic process	23
		oxidoreductase activity, acting on paired donors, with oxidation of a pair of donors resulting in the reduction of molecular oxygen to two molecules of water	45	amine metabolic process	23
		DNA topoisomerase type II (ATP-hydrolyzing) activity	44	cytokinin metabolic process	23
		pseudouridine synthase activity	43	transcription initiation from RNA polymerase II promoter	22
		inositol 3-alpha-galactosyltransferase activity	43	mitochondrial pyruvate transport	22
		mRNA binding	42	carbohydrate transport	22
		carbon-nitrogen ligase activity, with glutamine as amido-N-donor	42	regulation of signal transduction	22
		ferrochelatase activity	41	DNA integration	22
		beta-fructofuranosidase activity	41	regulation of cell cycle	22
		sucrose alpha-glucosidase activity	41	glucose catabolic process	21
		ATP-dependent helicase activity	41	translational termination	21
		drug binding	41	superoxide metabolic process	21
		oxidoreductase activity, acting on diphenols and related substances as donors	41	thiamine biosynthetic process	21
		alpha-L-arabinofuranosidase activity	40	lipid catabolic process	21
		methionine adenosyltransferase activity	39	inositol trisphosphate metabolic process	21
		4 iron, 4 sulfur cluster binding	39	regulation of circadian rhythm	21
		pantothenate kinase activity	38	cellular metabolic process	21
		RNA methyltransferase activity	38	spindle assembly	21
		alternative oxidase activity	38	spliceosomal snRNP assembly	20
		magnesium ion transmembrane transporter activity	38	glutaminyl-tRNA aminoacylation	20
		DNA helicase activity	37	nucleocytoplasmic transport	20
		glucose-6-phosphate dehydrogenase activity	37	regulation of gene expression	20
		manganese ion binding	37	Arp2/3 complex-mediated actin nucleation	20
		inorganic anion exchanger activity	36	actin nucleation	20
		thiolester hydrolase activity	36	base-excision repair	19
		ferric iron binding	35	mRNA cleavage	19
		peptidase activity	35	tRNA modification	19
		glutamyl-tRNA reductase activity	35	protein N-linked glycosylation	19
		terpene synthase activity	35	mitotic nuclear division	19
		hydrolase activity, acting on glycosyl bonds	35	leucine biosynthetic process	19
		single-stranded DNA binding	33	brassinosteroid mediated signaling pathway	19
		mRNA guanylyltransferase activity	33	tryptophan catabolic process to kynurenine	19
		endopeptidase activity	32	glycerolipid biosynthetic process	19
		hydroxymethylglutaryl-CoA reductase (NADPH) activity	32	barbed-end actin filament capping	19
		hydrolase activity, acting on carbon-nitrogen (but not peptide) bonds, in linear amides	32	acetyl-CoA biosynthetic process from pyruvate	18
		isomerase activity	32	pentose-phosphate shunt	18
		TBP-class protein binding	32	phosphatidylinositol biosynthetic process	18
		aminopeptidase activity	31	L-phenylalanine biosynthetic process	18
		phosphatidylinositol phospholipase C activity	31	response to auxin	18
		voltage-gated anion channel activity	31	transposition, DNA-mediated	17
		ubiquitin-ubiquitin ligase activity	31	glycyl-tRNA aminoacylation	17
		chitinase activity	30	SOS response	17
		phosphopyruvate hydratase activity	30	negative regulation of translation	17
		prenyltransferase activity	30	protein repair	17
		glycerophosphodiester phosphodiesterase activity	30	proteasome-mediated ubiquitin-dependent protein catabolic process	17
		nucleosome binding	30	cellular glucose homeostasis	16
		DNA topoisomerase activity	29	ATP biosynthetic process	16
		7S RNA binding	29	ammonium transport	16
		phosphotransferase activity, for other substituted phosphate groups	29	protein processing	16
		glycogen phosphorylase activity	28	peroxisome fission	16
		structural constituent of nuclear pore	28	carbohydrate phosphorylation	16
		quinone binding	28	vesicle docking	16
		calcium-dependent cysteine-type endopeptidase activity	27	ammonium transmembrane transport	16
		porphobilinogen synthase activity	27	sucrose biosynthetic process	15
		triose-phosphate isomerase activity	27	mRNA catabolic process	15
		racemase and epimerase activity, acting on carbohydrates and derivatives	27	protein methylation	15
		jasmonate-amino synthetase activity	27	phosphate ion transport	15
		mannosyl-oligosaccharide 1,2-alpha-mannosidase activity	26	coenzyme M biosynthetic process	15
		oligosaccharyl transferase activity	26	glucosinolate catabolic process	15
		1-deoxy-D-xylulose-5-phosphate synthase activity	26	intracellular transport	15
		oxidoreductase activity, acting on NAD(P)H, oxygen as acceptor	26	nitrile biosynthetic process	15
		fatty-acyl-CoA binding	25	isocitrate metabolic process	14
		ATPase activator activity	25	purine nucleobase transport	14
		phosphoprotein phosphatase activity	25	actin filament organization	14
		iron ion transmembrane transporter activity	25	nucleotide biosynthetic process	14
		protein prenyltransferase activity	25	positive gravitropism	14
		serine O-acetyltransferase activity	25	regulation of proton transport	14
		glycolipid transporter activity	25	molybdate ion transport	14
		glycolipid binding	25	nicotianamine biosynthetic process	14
		phosphoenolpyruvate carboxykinase (ATP) activity	24	spliceosomal tri-snRNP complex assembly	13
		phenylalanine-tRNA ligase activity	24	RNA methylation	13
		arginine decarboxylase activity	24	arginyl-tRNA aminoacylation	13
		ribonuclease T2 activity	24	heme oxidation	13
		protein-disulfide reductase activity	24	DNA metabolic process	12
		CTP synthase activity	23	double-strand break repair via nonhomologous end joining	12
		cysteine-type endopeptidase activity	23	asparaginyl-tRNA aminoacylation	12
		ketol-acid reductoisomerase activity	23	protein retention in ER lumen	12
		guanyl-nucleotide exchange factor activity	23	protein targeting to peroxisome	12
		primary amine oxidase activity	23	aromatic amino acid family metabolic process	12
		plastoquinol--plastocyanin reductase activity	23	GDP-mannose biosynthetic process	12
		cytokinin dehydrogenase activity	23	negative regulation of transcription from RNA polymerase III promoter	12
		pre-mRNA branch point binding	23	cellular glucan metabolic process	11
		phosphoglycerate mutase activity	22	GMP biosynthetic process	11
		sugar:proton symporter activity	22	translational frameshifting	11
		ribonuclease activity	21	protein ADP-ribosylation	11
		tRNA (guanine-N2-)-methyltransferase activity	21	ceramide metabolic process	11
		antioxidant activity	21	post-chaperonin tubulin folding pathway	11
		ribosome binding	21	NAD biosynthetic process	11
		inositol tetrakisphosphate 1-kinase activity	21	malate transport	11
		inositol-1,3,4-trisphosphate 6-kinase activity	21	protein import into mitochondrial matrix	11
		inositol-1,3,4-trisphosphate 5-kinase activity	21	mRNA cis splicing, via spliceosome	11
		DNA ligase (ATP) activity	20	positive regulation of translational elongation	11
		formate-tetrahydrofolate ligase activity	20	positive regulation of translational termination	11
		N,N-dimethylaniline monooxygenase activity	20	DNA replication, synthesis of RNA primer	10
		triglyceride lipase activity	20	seryl-tRNA aminoacylation	10
		glutamine-tRNA ligase activity	20	mitotic spindle assembly checkpoint	10
		signal recognition particle binding	20	lipoate biosynthetic process	10
		translation initiation factor binding	20	carotenoid biosynthetic process	10
		2-isopropylmalate synthase activity	19	snRNA processing	10
		arylformamidase activity	19	poly(A)+ mRNA export from nucleus	10
		diacylglycerol O-acyltransferase activity	19	mRNA 3'-end processing	10
		protein tyrosine phosphatase activity	19	mature ribosome assembly	10
		ubiquinol-cytochrome-c reductase activity	19	'de novo' IMP biosynthetic process	9
		translation release factor activity, codon specific	19	double-strand break repair	9
		oxidoreductase activity, acting on a sulfur group of donors, disulfide as acceptor	19	asparagine biosynthetic process	9
		acyl-[acyl-carrier-protein] desaturase activity	19	acyl-CoA metabolic process	9
		transferase activity, transferring acyl groups, acyl groups converted into alkyl on transfer	19	one-carbon metabolic process	9
		NAD+ binding	19	response to water	9
		GTP cyclohydrolase II activity	18	aromatic compound catabolic process	9
		1-phosphatidylinositol 4-kinase activity	18	actin filament depolymerization	9
		dolichyl-diphosphooligosaccharide-protein glycotransferase activity	18	animal organ development	9
		prephenate dehydratase activity	18	nitrogen compound transport	9
		pyruvate dehydrogenase (acetyl-transferring) activity	18	carbohydrate derivative biosynthetic process	9
		3,4-dihydroxy-2-butanone-4-phosphate synthase activity	18	autophagosome assembly	8
		snRNA binding	18	double-strand break repair via homologous recombination	8
		guanyl nucleotide binding	18	nucleoside diphosphate phosphorylation	8
		G-protein beta/gamma-subunit complex binding	18	GTP biosynthetic process	8
		ADP-dependent NAD(P)H-hydrate dehydratase activity	18	UTP biosynthetic process	8
		isopentenyl-diphosphate delta-isomerase activity	17	CTP biosynthetic process	8
		pyridoxamine-phosphate oxidase activity	17	DNA catabolic process	8
		glycine-tRNA ligase activity	17	transcription from RNA polymerase III promoter	8
		rRNA N-glycosylase activity	17	prolyl-tRNA aminoacylation	8
		transcription corepressor activity	16	arginine biosynthetic process	8
		hexokinase activity	16	tyrosine biosynthetic process	8
		glutathione peroxidase activity	16	Mo-molybdopterin cofactor biosynthetic process	8
		thiamine-phosphate diphosphorylase activity	16	porphyrin-containing compound biosynthetic process	8
		glucose binding	16	endocytosis	8
		ammonium transmembrane transporter activity	16	mitotic chromosome condensation	8
		rRNA binding	16	response to metal ion	8
		alpha-amylase activity	15	RNA metabolic process	8
		cysteine-type endopeptidase inhibitor activity	15	cell differentiation	8
		inorganic phosphate transmembrane transporter activity	15	molybdopterin cofactor biosynthetic process	8
		tRNA (guanine-N7-)-methyltransferase activity	15	very long-chain fatty acid biosynthetic process	8
		mechanically-gated ion channel activity	15	histone H4 acetylation	8
		D-alanine-D-alanine ligase activity	15	histone H2A acetylation	8
		acireductone dioxygenase [iron(II)-requiring] activity	15	negative regulation of transcription, DNA-templated	8
		sucrose-phosphate phosphatase activity	15	vesicle fusion with Golgi apparatus	8
		phosphatidylinositol phosphate phosphatase activity	15	mRNA transport	8
		DNA clamp loader activity	14	protein homooligomerization	8
		deoxyribodipyrimidine photo-lyase activity	14	centrosome organization	8
		isocitrate dehydrogenase (NADP+) activity	14	protein targeting to Golgi	7
		purine nucleobase transmembrane transporter activity	14	glycerol metabolic process	7
		calcium-dependent phospholipid binding	14	'de novo' pyrimidine nucleobase biosynthetic process	7
		molybdate ion transmembrane transporter activity	14	N-glycan processing	7
		intramolecular lyase activity	14	glutathione biosynthetic process	7
		nicotianamine synthase activity	14	Golgi organization	7
		single-stranded telomeric DNA binding	14	reciprocal meiotic recombination	7
		adenyl-nucleotide exchange factor activity	13	pentose-phosphate shunt, non-oxidative branch	7
		translation release factor activity	13	protein arginylation	7
		heme oxygenase (decyclizing) activity	13	charged-tRNA amino acid modification	7
		arginine-tRNA ligase activity	13	regulation of actin filament polymerization	7
		tocopherol cyclase activity	13	centromere complex assembly	7
		ligase activity, forming carbon-nitrogen bonds	13	cell wall modification	7
		peptide deformylase activity	13	cell wall biogenesis	7
		protein homodimerization activity	13	negative regulation of DNA recombination	7
		palmitoyl hydrolase activity	13	formaldehyde catabolic process	7
		phosphoribosyl-AMP cyclohydrolase activity	12	phytochelatin biosynthetic process	7
		polyribonucleotide nucleotidyltransferase activity	12	DNA damage checkpoint	6
		asparagine-tRNA ligase activity	12	microtubule nucleation	6
		protein C-terminus binding	12	cell adhesion	6
		chitin binding	12	lysine biosynthetic process via diaminopimelate	6
		peptide-methionine (S)-S-oxide reductase activity	12	positive regulation of autophagy	6
		oxidoreductase activity, acting on NAD(P)H	12	leukotriene biosynthetic process	6
		carbon-sulfur lyase activity	12	L-methionine salvage from methylthioadenosine	6
		ligase activity	12	rRNA methylation	6
		tRNA dihydrouridine synthase activity	12	regulation of protein catabolic process	6
		ER retention sequence binding	12	urea catabolic process	6
		RNA cap binding	11	regulation of phosphoprotein phosphatase activity	6
		aminoacyl-tRNA editing activity	11	regulation of mRNA splicing, via spliceosome	6
		DNA primase activity	11	glycosaminoglycan biosynthetic process	5
		GMP synthase (glutamine-hydrolyzing) activity	11	mitochondrial electron transport, ubiquinol to cytochrome c	5
		aminoacyl-tRNA hydrolase activity	11	dTMP biosynthetic process	5
		enzyme inhibitor activity	11	regulation of translational fidelity	5
		nucleoside transmembrane transporter activity	11	C-terminal protein methylation	5
		galactosylgalactosylxylosylprotein 3-beta-glucuronosyltransferase activity	11	dolichol-linked oligosaccharide biosynthetic process	5
		xyloglucan:xyloglucosyl transferase activity	11	glycine biosynthetic process	5
		DNA polymerase activity	11	methionine metabolic process	5
		3-deoxy-7-phosphoheptulonate synthase activity	10	proline catabolic process	5
		cytochrome-c oxidase activity	10	phospholipid metabolic process	5
		superoxide dismutase activity	10	tetrahydrobiopterin biosynthetic process	5
		serine-tRNA ligase activity	10	heme a biosynthetic process	5
		omega peptidase activity	10	cell volume homeostasis	5
		quinolinate synthetase A activity	10	deoxyribonucleoside diphosphate metabolic process	5
		oxidoreductase activity, acting on CH-OH group of donors	10	thiamine diphosphate biosynthetic process	5
		strictosidine synthase activity	10	cobalamin biosynthetic process	5
		lipoate synthase activity	10	pyridoxal 5'-phosphate salvage	5
		adenosylhomocysteinase activity	9	response to biotic stimulus	5
		adenylate kinase activity	9	phytochromobilin biosynthetic process	5
		asparagine synthase (glutamine-hydrolyzing) activity	9	cellulose microfibril organization	5
		chorismate mutase activity	9	heparan sulfate proteoglycan biosynthetic process	5
		tetrahydrofolylpolyglutamate synthase activity	9	pantothenate biosynthetic process	5
		glutamine-fructose-6-phosphate transaminase (isomerizing) activity	9	cytochrome complex assembly	5
		glycerol-3-phosphate O-acyltransferase activity	9	protein-phycocyanobilin linkage	5
		polygalacturonase activity	9	cyanide metabolic process	5
		ribose phosphate diphosphokinase activity	9	regulation of mitotic metaphase/anaphase transition	5
		holo-[acyl-carrier-protein] synthase activity	9	cytoplasmic microtubule organization	5
		nickel cation binding	9	activation of protein kinase activity	5
		oxidoreductase activity, acting on paired donors, with incorporation or reduction of molecular oxygen, NAD(P)H as one donor, and incorporation of two atoms of oxygen into one donor	9	cellular modified amino acid biosynthetic process	5
		oxo-acid-lyase activity	9	regulation of GTPase activity	5
		protein kinase regulator activity	9	proteasome assembly	5
		enzyme regulator activity	9	protein neddylation	5
		acyl-CoA hydrolase activity	9	regulation of catalytic activity	5
		beta-1,4-mannosylglycoprotein 4-beta-N-acetylglucosaminyltransferase activity	8	cellular response to stimulus	5
		catechol oxidase activity	8	regulation of mitotic spindle organization	5
		fumarylacetoacetase activity	8	tail-anchored membrane protein insertion into ER membrane	5
		histidinol dehydrogenase activity	8	sulfate transmembrane transport	5
		indole-3-glycerol-phosphate synthase activity	8	ribosomal large subunit export from nucleus	4
		nucleoside diphosphate kinase activity	8	DNA replication initiation	4
		prephenate dehydrogenase (NADP+) activity	8	DNA-templated transcription, termination	4
		proline-tRNA ligase activity	8	leucyl-tRNA aminoacylation	4
		5S rRNA binding	8	tryptophanyl-tRNA aminoacylation	4
		sulfotransferase activity	8	signal peptide processing	4
		prephenate dehydrogenase (NAD+) activity	8	protein demethylation	4
		endodeoxyribonuclease activity, producing 5'-phosphomonoesters	8	tryptophan metabolic process	4
		DNA 5'-adenosine monophosphate hydrolase activity	8	phosphatidylserine biosynthetic process	4
		violaxanthin de-epoxidase activity	8	cellular aromatic compound metabolic process	4
		fatty-acyl-CoA reductase (alcohol-forming) activity	8	lipid transport	4
		double-stranded RNA binding	7	purine nucleobase biosynthetic process	4
		adenylosuccinate synthase activity	7	plant-type secondary cell wall biogenesis	4
		arginyltransferase activity	7	myo-inositol hexakisphosphate biosynthetic process	4
		glutathione synthase activity	7	nucleotide-sugar transport	4
		glycerone kinase activity	7	protein farnesylation	4
		hydroxymethylglutaryl-CoA synthase activity	7	methylglyoxal catabolic process to D-lactate via S-lactoyl-glutathione	4
		isocitrate lyase activity	7	regulation of cell proliferation	4
		orotidine-5'-phosphate decarboxylase activity	7	ribosomal large subunit biogenesis	4
		ribose-5-phosphate isomerase activity	7	peptide biosynthetic process	4
		uroporphyrinogen decarboxylase activity	7	positive regulation of catalytic activity	4
		Rho guanyl-nucleotide exchange factor activity	7	proton-transporting ATP synthase complex assembly	4
		galactoside 2-alpha-L-fucosyltransferase activity	7	xylan biosynthetic process	4
		fucosyltransferase activity	7	positive regulation of Notch signaling pathway	4
		3-deoxy-8-phosphooctulonate synthase activity	7	tetrahydrofolate biosynthetic process	4
		oxidoreductase activity, acting on NAD(P)H, quinone or similar compound as acceptor	7	non-motile cilium assembly	4
		glutathione gamma-glutamylcysteinyltransferase activity	7	cell cycle checkpoint	3
		intramolecular transferase activity	7	sulfate assimilation	3
		S-formylglutathione hydrolase activity	7	DNA catabolic process, endonucleolytic	3
		pectinesterase activity	7	IMP biosynthetic process	3
		mannosyl-glycoprotein endo-beta-N-acetylglucosaminidase activity	7	regulation of DNA replication	3
		tRNA A64-2'-O-ribosylphosphate transferase activity	7	tRNA splicing, via endonucleolytic cleavage and ligation	3
		nutrient reservoir activity	7	N-terminal protein myristoylation	3
		cofactor binding	7	regulation of nitrogen utilization	3
		peroxiredoxin activity	7	Golgi to plasma membrane transport	3
		D-arabinono-1,4-lactone oxidase activity	6	mitochondrion organization	3
		3-oxoacyl-[acyl-carrier-protein] synthase activity	6	cell cycle arrest	3
		hydroxymethylbilane synthase activity	6	peptidyl-lysine modification to peptidyl-hypusine	3
		mannose-6-phosphate isomerase activity	6	lipid A biosynthetic process	3
		phosphatidylserine decarboxylase activity	6	deoxyribonucleotide catabolic process	3
		phosphomannomutase activity	6	response to light stimulus	3
		protein phosphatase inhibitor activity	6	plant-type hypersensitive response	3
		hedgehog receptor activity	6	response to sucrose	3
		selenium binding	6	cytidine deamination	3
		rRNA methyltransferase activity	6	histone deacetylation	3
		diaminopimelate epimerase activity	6	protein N-linked glycosylation via asparagine	3
		P-P-bond-hydrolysis-driven protein transmembrane transporter activity	6	isopentenyl diphosphate biosynthetic process, methylerythritol 4-phosphate pathway	3
		NAD(P)H oxidase activity	6	electron transport chain	3
		hydroxymethyl-, formyl- and related transferase activity	6	positive regulation of transcription elongation from RNA polymerase II promoter	3
		phosphatase activity	6	ion transmembrane transport	3
		argininosuccinate synthase activity	5	U6 snRNA 3'-end processing	3
		cysteine synthase activity	5	cellular response to nitrogen levels	3
		dihydrofolate reductase activity	5	primary metabolic process	3
		glutamate-cysteine ligase activity	5	protein import into chloroplast thylakoid membrane	3
		methylenetetrahydrofolate reductase (NAD(P)H) activity	5	dimethylallyl diphosphate biosynthetic process	3
		alpha-L-fucosidase activity	5	regulation of nitric-oxide synthase activity	3
		dolichyl-phosphate-glucose-glycolipid alpha-glucosyltransferase activity	5	kinetochore assembly	3
		proline dehydrogenase activity	5	histone H3-K4 methylation	3
		protein C-terminal S-isoprenylcysteine carboxyl O-methyltransferase activity	5	vacuolar proton-transporting V-type ATPase complex assembly	3
		riboflavin synthase activity	5	CAAX-box protein processing	3
		thiamine diphosphokinase activity	5	tryptophan biosynthetic process	2
		thymidylate synthase activity	5	alcohol metabolic process	2
		tyrosine-tRNA ligase activity	5	regulation of transcription from RNA polymerase III promoter	2
		tryptophan synthase activity	5	cysteinyl-tRNA aminoacylation	2
		Rho GDP-dissociation inhibitor activity	5	N-terminal protein amino acid methylation	2
		4-alpha-hydroxytetrahydrobiopterin dehydratase activity	5	endoplasmic reticulum organization	2
		NADH dehydrogenase (ubiquinone) activity	5	queuosine biosynthetic process	2
		protein-N-terminal asparagine amidohydrolase activity	5	cyanate metabolic process	2
		pyridoxal kinase activity	5	putrescine biosynthetic process	2
		oxidoreductase activity, acting on the CH-CH group of donors, iron-sulfur protein as acceptor	5	sucrose transport	2
		acid-amino acid ligase activity	5	protein import into peroxisome matrix	2
		oxidoreductase activity, acting on the CH-OH group of donors, quinone or similar compound as acceptor	5	peptidyl-diphthamide biosynthetic process from peptidyl-histidine	2
		thiol oxidase activity	5	cellular response to oxidative stress	2
		nitronate monooxygenase activity	5	peptidyl-arginine N-methylation	2
		NEDD8 activating enzyme activity	5	copper ion transmembrane transport	2
		thiamine binding	5	arginine biosynthetic process via ornithine	2
		peptide-methionine (R)-S-oxide reductase activity	5	pteridine-containing compound metabolic process	2
		mannosylglycoprotein endo-beta-mannosidase activity	5	protein import into mitochondrial inner membrane	2
		ATP-dependent 3'-5' DNA helicase activity	5	nuclear-transcribed mRNA catabolic process, non-stop decay	2
		L-3-cyanoalanine synthase activity	5	nuclear-transcribed mRNA catabolic process, no-go decay	2
		cobalt ion binding	5	RNA surveillance	2
		D-aminoacyl-tRNA deacylase activity	5	cellular response to high light intensity	2
		3-dehydroquinate dehydratase activity	4	mitochondrial fission	1
		4-hydroxyphenylpyruvate dioxygenase activity	4	tRNA 5'-leader removal	1
		GTP cyclohydrolase I activity	4	chromatin assembly or disassembly	1
		IMP cyclohydrolase activity	4	chromatin silencing at telomere	1
		N-acetyl-gamma-glutamyl-phosphate reductase activity	4	proline biosynthetic process	1
		hydroxyacylglutathione hydrolase activity	4	protein targeting	1
		phosphoribosylamine-glycine ligase activity	4	ubiquinone biosynthetic process	1
		phosphoribosylaminoimidazolecarboxamide formyltransferase activity	4	glutathione metabolic process	1
		protein-L-isoaspartate (D-aspartate) O-methyltransferase activity	4	copper ion transport	1
		shikimate 3-dehydrogenase (NADP+) activity	4	mitotic cell cycle checkpoint	1
		leucine-tRNA ligase activity	4	cell proliferation	1
		tryptophan-tRNA ligase activity	4	protein secretion	1
		lipid transporter activity	4	oligosaccharide biosynthetic process	1
		UDP-glucose:hexose-1-phosphate uridylyltransferase activity	4	response to heat	1
		ferrous iron binding	4	response to salt stress	1
		metalloexopeptidase activity	4	embryo development	1
		5'-nucleotidase activity	4	response to ionizing radiation	1
		riboflavin kinase activity	4	chlorophyll catabolic process	1
		uridylate kinase activity	4	sterol metabolic process	1
		glucuronosyltransferase activity	4	protein-heme linkage	1
		cyclin-dependent protein serine/threonine kinase regulator activity	4	response to pheromone	1
		oxidoreductase activity, acting on single donors with incorporation of molecular oxygen	4	inositol catabolic process	1
		phosphatidylinositol N-acetylglucosaminyltransferase activity	4	pyrimidine nucleobase biosynthetic process	1
		inositol 3-kinase activity	4	microtubule organizing center organization	1
		phosphatase activator activity	4	mitotic DNA replication checkpoint	1
		1-deoxy-D-xylulose-5-phosphate reductoisomerase activity	4	ribosomal small subunit biogenesis	1
		4-(cytidine 5'-diphospho)-2-C-methyl-D-erythritol kinase activity	4	histone exchange	1
		carboxylic ester hydrolase activity	4	protein import into mitochondrial outer membrane	1
		NADPH binding	4	negative regulation of translational elongation	1
		3'-5'-exoribonuclease activity	3	microtubule severing	1
		tRNA-intron endonuclease activity	3	actin filament bundle assembly	1
		transcription factor activity, transcription factor binding	3	protein oligomerization	1
		prenylcysteine oxidase activity	3	chromosome separation	1
		nucleoside binding	3	meiotic cell cycle	1
		3-methyl-2-oxobutanoate hydroxymethyltransferase activity	3	potassium ion homeostasis	1
		N6-(1,2-dicarboxyethyl)AMP AMP-lyase (fumarate-forming) activity	3	auxin transport	1
		adenylylsulfate kinase activity	3
		biotin-[acetyl-CoA-carboxylase] ligase activity	3
		chorismate synthase activity	3
		cytidine deaminase activity	3
		electron-transferring-flavoprotein dehydrogenase activity	3
		glutamate N-acetyltransferase activity	3
		glycylpeptide N-tetradecanoyltransferase activity	3
		methylenetetrahydrofolate dehydrogenase (NADP+) activity	3
		ribonuclease P activity	3
		dolichyl-phosphate-mannose-glycolipid alpha-mannosyltransferase activity	3
		uroporphyrinogen-III synthase activity	3
		cyclin-dependent protein serine/threonine kinase inhibitor activity	3
		serine-type endopeptidase inhibitor activity	3
		sialyltransferase activity	3
		oxidized purine nucleobase lesion DNA N-glycosylase activity	3
		DNA-3-methyladenine glycosylase activity	3
		S-adenosylmethionine-dependent methyltransferase activity	3
		sirohydrochlorin cobaltochelatase activity	3
		ribulose-bisphosphate carboxylase activity	3
		centromeric DNA binding	3
		syntaxin binding	3
		DNA polymerase processivity factor activity	3
		telomeric DNA binding	3
		5'-3' DNA helicase activity	3
		ATP-dependent 5'-3' DNA helicase activity	3
		malonyl-CoA decarboxylase activity	3
		4-hydroxy-3-methylbut-2-en-1-yl diphosphate reductase activity	3
		glucan endo-1,3-beta-glucanase activity, C-3 substituted reducing group	3
		glucan endo-1,4-beta-glucanase activity, C-3 substituted reducing group	3
		protein disulfide isomerase activity	2
		2-amino-4-hydroxy-6-hydroxymethyldihydropteridine diphosphokinase activity	2
		ATP phosphoribosyltransferase activity	2
		GPI-anchor transamidase activity	2
		alcohol O-acetyltransferase activity	2
		argininosuccinate lyase activity	2
		dephospho-CoA kinase activity	2
		metallocarboxypeptidase activity	2
		imidazoleglycerol-phosphate dehydratase activity	2
		mevalonate kinase activity	2
		RNA-DNA hybrid ribonuclease activity	2
		pantoate-beta-alanine ligase activity	2
		protein-arginine deiminase activity	2
		sulfate adenylyltransferase (ATP) activity	2
		cysteine-tRNA ligase activity	2
		copper ion transmembrane transporter activity	2
		tRNA guanylyltransferase activity	2
		queuine tRNA-ribosyltransferase activity	2
		sucrose transmembrane transporter activity	2
		formyltetrahydrofolate deformylase activity	2
		lipid-A-disaccharide synthase activity	2
		phospho-N-acetylmuramoyl-pentapeptide-transferase activity	2
		carboxyl- or carbamoyltransferase activity	2
		oxygen binding	2
		sulfiredoxin activity	2
		single-stranded DNA 5'-3' exodeoxyribonuclease activity	2
		transcription coactivator activity	1
		gamma-glutamyltransferase activity	1
		3-dehydroquinate synthase activity	1
		DNA-(apurinic or apyrimidinic site) lyase activity	1
		FMN adenylyltransferase activity	1
		IMP dehydrogenase activity	1
		adenosine deaminase activity	1
		coproporphyrinogen oxidase activity	1
		cyclic-nucleotide phosphodiesterase activity	1
		dihydroorotase activity	1
		glutaminase activity	1
		hydroxyethylthiazole kinase activity	1
		nicotinate-nucleotide diphosphorylase (carboxylating) activity	1
		phospholipase A2 activity	1
		phosphoribosylanthranilate isomerase activity	1
		protein serine/threonine/tyrosine kinase activity	1
		pyrroline-5-carboxylate reductase activity	1
		ribonucleoside-diphosphate reductase activity, thioredoxin disulfide as acceptor	1
		folic acid binding	1
		growth factor activity	1
		inositol-1,4,5-trisphosphate 3-kinase activity	1
		alpha-1,6-mannosylglycoprotein 2-beta-N-acetylglucosaminyltransferase activity	1
		2-C-methyl-D-erythritol 2,4-cyclodiphosphate synthase activity	1
		5-amino-6-(5-phosphoribosylamino)uracil reductase activity	1
		isochorismate synthase activity	1
		tetraacyldisaccharide 4'-kinase activity	1
		copper chaperone activity	1
		superoxide dismutase copper chaperone activity	1
		oxidoreductase activity, acting on iron-sulfur proteins as donors	1
		transferase activity, transferring pentosyl groups	1
		hydrolase activity, hydrolyzing N-glycosyl compounds	1
		snoRNA binding	1
		inositol pentakisphosphate 2-kinase activity	1
		racemase activity, acting on amino acids and derivatives	1
		2,3-bisphosphoglycerate-independent phosphoglycerate mutase activity	1
		chlorophyllase activity	1
		cholestenol delta-isomerase activity	1
		inositol oxygenase activity	1
		actin filament binding	1

## Sheet: KOG
KOG Functional class	Description	Number of transcripts
A	RNA processing and modification	2252
B	Chromatin structure and dynamics	556
C	Energy production and conversion	1008
D	Cell cycle control, cell division, chromosome partitioning	935
E	Amino acid transport and metabolism	1203
F	Nucleotide transport and metabolism	287
G	Carbohydrate transport and metabolism	2018
H	Coenzyme transport and metabolism	276
I	Lipid transport and metabolism	1249
J	Translation, ribosomal structure and biogenesis	1022
K	Transcription	2839
L	Replication, recombination and repair	641
M	Cell wall/membrane/envelope biogeneis	513
N	Cell motility	10
O	Posttranslational modification, protein turnover, chaperones	4288
P	Inorganic ion transport and metabolism	1410
Q	Secondary metabolites biosynthesis, transport and catabolism	994
R	General function prediction only	6410
S	Function unknown	3228
T	Signal transduction mechanisms	9893
U	Intracellular trafficking, secretion, and vesicular transport	1914
V	Defense mechanisms	366
W	Extracellular structures	0
X	Unnamed protein	0
Y	Nuclear structure	35
Z	Cytoskeleton	447

## Sheet: KEGG
KEGG pathway	Number of transcripts
Pyruvate metabolism	2231
Spliceosome	1732
Protein processing in endoplasmic reticulum	1342
RNA transport	1088
Starch and sucrose metabolism	1059
Ubiquitin mediated proteolysis	1023
Glycolysis / Gluconeogenesis	949
Inositol phosphate metabolism	873
Plant hormone signal transduction	818
Endocytosis	693
Oxidative phosphorylation	685
Circadian rhythm - plant	660
Purine metabolism	637
mRNA surveillance pathway	612
RNA degradation	554
Plant-pathogen interaction	532
Porphyrin and chlorophyll metabolism	496
Glyoxylate and dicarboxylate metabolism	482
Aminoacyl-tRNA biosynthesis	474
MAPK signaling pathway - plant	447
Nitrogen metabolism	425
Proteasome	387
Ribosome biogenesis in eukaryotes	373
Galactose metabolism	367
Photosynthesis	359
Photosynthesis - antenna proteins	355
ABC transporters	353
Citrate cycle (TCA cycle)	348
Ribosome	343
Cysteine and methionine metabolism	339
Glycerolipid metabolism	295
Glycerophospholipid metabolism	293
Terpenoid backbone biosynthesis	263
Amino sugar and nucleotide sugar metabolism	256
Basal transcription factors	250
Cell cycle	248
Thyroid hormone signaling pathway	244
Sphingolipid metabolism	232
Protein export	216
Viral carcinogenesis	214
Carotenoid biosynthesis	208
Ras signaling pathway	205
Fatty acid biosynthesis	196
Lysosome	195
Ascorbate and aldarate metabolism	182
Peroxisome	174
Hepatocellular carcinoma	159
Phenylpropanoid biosynthesis	159
Autophagy - animal	152
Carbon fixation in photosynthetic organisms	149
Arginine and proline metabolism	148
FoxO signaling pathway	148
Glutathione metabolism	147
Homologous recombination	145
MicroRNAs in cancer	144
PPAR signaling pathway	140
Linoleic acid metabolism	135
N-Glycan biosynthesis	135
Ferroptosis	134
Steroid biosynthesis	132
Pyrimidine metabolism	129
Glycine	127
Nicotinate and nicotinamide metabolism	127
Estrogen signaling pathway	126
Selenocompound metabolism	125
Sulfur metabolism	119
Mitophagy - yeast	110
Fatty acid degradation	109
Pentose phosphate pathway	108
SNARE interactions in vesicular transport	104
Lysine degradation	100
AMPK signaling pathway	99
Wnt signaling pathway	98
Apelin signaling pathway	95
Longevity regulating pathway - multiple species	94
Fanconi anemia pathway	92
Renin-angiotensin system	91
MAPK signaling pathway	90
Ubiquinone and other terpenoid-quinone biosynthesis	90
Fatty acid elongation	88
Phenylalanine	84
Fructose and mannose metabolism	83
Glycosylphosphatidylinositol(GPI)-anchor biosynthesis	81
Cutin	80
Other glycan degradation	80
Cell cycle - Caulobacter	79
MAPK signaling pathway - yeast	79
Phenylalanine metabolism	77
Transcriptional misregulation in cancers	76
Butanoate metabolism	74
ErbB signaling pathway	74
Tryptophan metabolism	74
Pentose and glucuronate interconversions	72
Phagosome	70
Tight junction	66
Hedgehog signaling pathway	65
Flavonoid biosynthesis	62
Mitophagy - animal	62
Other types of O-glycan biosynthesis	62
PI3K-Akt signaling pathway	62
Cell cycle - yeast	61
GABAergic synapse	58
Glucagon signaling pathway	55
Alzheimer's disease	54
DNA replication	54
Pantothenate and CoA biosynthesis	54
Folate biosynthesis	53
Calcium signaling pathway	52
HTLV-I infection	52
Thiamine metabolism	52
Alanine	51
Protein digestion and absorption	51
Phospholipase D signaling pathway	50
Antigen processing and presentation	49
Base excision repair	49
Insulin signaling pathway	49
Propanoate metabolism	46
Vitamin B6 metabolism	46
Autophagy - yeast	44
RIG-I-like receptor signaling pathway	44
Tyrosine metabolism	44
Monoterpenoid biosynthesis	43
Valine	42
Legionellosis	41
Histidine metabolism	40
Regulation of actin cytoskeleton	38
NOD-like receptor signaling pathway	37
Arginine biosynthesis	35
Human papillomavirus infection	35
Mismatch repair	35
Phosphatidylinositol signaling system	35
Prion diseases	35
Sesquiterpenoid and triterpenoid biosynthesis	35
Brassinosteroid biosynthesis	34
Glycosaminoglycan degradation	34
Nucleotide excision repair	34
alpha-Linolenic acid metabolism	30
Riboflavin metabolism	30
Zeatin biosynthesis	30
Biosynthesis of unsaturated fatty acids	29
Biotin metabolism	27
Synaptic vesicle cycle	27
Carbon fixation pathways in prokaryotes	25
Cyanoamino acid metabolism	25
Lysine biosynthesis	24
Non-homologous end-joining	23
Lipopolysaccharide biosynthesis	22
Pathogenic Escherichia coli infection	22
Signaling pathways regulating pluripotency of stem cells	22
Arachidonic acid metabolism	21
Taurine and hypotaurine metabolism	21
Dorso-ventral axis formation	20
TGF-beta signaling pathway	20
Various types of N-glycan biosynthesis	20
Notch signaling pathway	18
MAPK signaling pathway - fly	17
mTOR signaling pathway	17
C5-Branched dibasic acid metabolism	16
Flavone and flavonol biosynthesis	16
Methane metabolism	16
Drug metabolism - cytochrome P450	15
Toll and Imd signaling pathway	15
Apoptosis - fly	14
TNF signaling pathway	14
Meiosis - yeast	13
Necroptosis	13
Diterpenoid biosynthesis	11
Hippo signaling pathway -fly	11
Tropane	11
Amoebiasis	9
Chagas disease (American trypanosomiasis)	9
Glycosaminoglycan biosynthesis - chondroitin sulfate / dermatan sulfate	9
Insulin secretion	9
Two-component system	8
Vitamin digestion and absorption	8
Amyotrophic lateral sclerosis (ALS)	7
Cellular senescence	7
Fluorobenzoate degradation	7
Hippo signaling pathway	7
Sulfur relay system	7
Leishmaniasis	6
p53 signaling pathway	6
Systemic lupus erythematosus	6
Lipoic acid metabolism	5
Vibrio cholerae infection	5
Betalain biosynthesis	4
Choline metabolism in cancer	4
Hedgehog signaling pathway - fly	4
Insulin resistance	4
Longevity regulating pathway - worm	4
One carbon pool by folate	4
Endocrine resistance	3
Measles	3
Mineral absorption	3
Adherens junction	2
beta-Alanine metabolism	2
Central carbon metabolism in cancer	2
Herpes simplex infection	2
NF-kappa B signaling pathway	2
Rap1 signaling pathway	2
Vasopressin-regulated water reabsorption	2
Alcoholism	1
Influenza A	1
Peptidoglycan biosynthesis	1
Retinol metabolism	1
