# Supplementary material for: Uncovering full-length transcript isoforms of sugarcane cultivar Khon Kaen 3 using single-molecule long-read sequencing
Source: PeerJ. 2018 Oct 30;6:e5818. doi: 10.7717/peerj.5818 (PMC6214230; doi:10.7717/peerj.5818)
Supplement: Table S8 — 1,868 PacBio-isoforms generated in this study which show expression level ≥ 50 RPKM are shown along with the details of expression levels and functional analysis. [file peerj-06-5818-s008.xlsx]

## Sheet: list
PacBio transcript ID	Sequence length	Expression level (RPKM)	Hit plant nucleotide	Plant nucleotide description	KOG	KOG description	KOG functional class	KEGG Orthology	KEGG description	Gene Ontology	Gene Ontology description
c46758/f4p1/700	700	3824.85	Sobic.007G071500.1	photosystem II subunit R	N/A	N/A	N/A	K03541	Photosynthesis ;Photosynthesis proteins	GO:0042651,GO:0015979,GO:0009654,GO:0009523	thylakoid membrane;photosynthesis;photosystem II oxygen evolving complex;photosystem II
c17167/f1p3/626	626	2878.62	Sobic.010G160700.1	phosphoenolpyruvate carboxylase 2	N/A	N/A	N/A	K01595	Pyruvate metabolism ;Carbon fixation in photosynthetic organisms ;Carbon fixation pathways in prokaryotes ;Methane metabolism	GO:0015977,GO:0008964,GO:0006099	carbon fixation;phosphoenolpyruvate carboxylase activity;tricarboxylic acid cycle
c14825/f1p24/1158	1158	2763.2	Sobic.003G234200.6	beta carbonic anhydrase 4	KOG1578	Predicted carbonic anhydrase involved in protection against oxidative damage	P	K01673	Nitrogen metabolism	GO:0008270,GO:0004089	zinc ion binding;carbonate dehydratase activity
c24466/f1p0/749	749	2446.81	Sobic.010G160700.1	phosphoenolpyruvate carboxylase 2	N/A	N/A	N/A	K01595	Pyruvate metabolism ;Carbon fixation in photosynthetic organisms ;Carbon fixation pathways in prokaryotes ;Methane metabolism	GO:0015977,GO:0008964,GO:0006099	carbon fixation;phosphoenolpyruvate carboxylase activity;tricarboxylic acid cycle
c19603/f1p1/382	382	2232.92	Sobic.002G288300.1	photosystem II light harvesting complex gene B1B2	N/A	N/A	N/A	K08912	Photosynthesis - antenna proteins ;Photosynthesis proteins	GO:0016020,GO:0009765	membrane;photosynthesis, light harvesting
c9790/f1p11/704	704	2082.46	Sobic.004G056900.1	photosystem I light harvesting complex gene 1	N/A	N/A	N/A	K08907	Photosynthesis - antenna proteins ;Photosynthesis proteins	GO:0016020,GO:0009765	membrane;photosynthesis, light harvesting
c17755/f2p0/553	553	1923.82	Sobic.003G397600.1	N/A	N/A	N/A	N/A	N/A	N/A	N/A	N/A
c1049/f18p4/768	768	1896.06	N/A	N/A	N/A	N/A	N/A	N/A	N/A	N/A	N/A
c15941/f1p7/739	739	1829.97	Sobic.001G177000.1	photosystem II light harvesting complex gene 2.3	N/A	N/A	N/A	K08913	Photosynthesis - antenna proteins ;Photosynthesis proteins	GO:0016020,GO:0009765	membrane;photosynthesis, light harvesting
c15845/f3p3/675	675	1673.7	Sobic.005G228700.1	metallothionein 2B	N/A	N/A	N/A	N/A	N/A	GO:0046872	metal ion binding
c33340/f2p9/872	872	1629.48	Sobic.002G288300.1	photosystem II light harvesting complex gene B1B2	N/A	N/A	N/A	K08912	Photosynthesis - antenna proteins ;Photosynthesis proteins	GO:0016020,GO:0009765	membrane;photosynthesis, light harvesting
c29040/f1p2/762	762	1621.31	Sobic.010G160700.1	phosphoenolpyruvate carboxylase 2	N/A	N/A	N/A	K01595	Pyruvate metabolism ;Carbon fixation in photosynthetic organisms ;Carbon fixation pathways in prokaryotes ;Methane metabolism	GO:0015977,GO:0008964,GO:0006099	carbon fixation;phosphoenolpyruvate carboxylase activity;tricarboxylic acid cycle
c13920/f3p3/751	751	1621.28	Sobic.002G324200.1	Translation initiation factor SUI1 family protein	KOG1770	Translation initiation factor 1 (eIF-1/SUI1)	J	K03113	RNA transport ;Translation factors	GO:0006413,GO:0003743	translational initiation;translation initiation factor activity
c44585/f1p5/2343	2343	1411.99	Sobic.009G132900.3	pyruvate orthophosphate dikinase	N/A	N/A	N/A	K01006	Pyruvate metabolism ;Carbon fixation in photosynthetic organisms ;Carbon fixation pathways in prokaryotes	GO:0016772,GO:0016310,GO:0016301,GO:0005524,GO:0050242,GO:0006090	transferase activity, transferring phosphorus-containing groups;phosphorylation;kinase activity;ATP binding;pyruvate, phosphate dikinase activity;pyruvate metabolic process
c34401/f4p25/1062	1062	1364.62	Sobic.003G370000.1	Chlorophyll A-B binding family protein	N/A	N/A	N/A	K03542	Photosynthesis ;Photosynthesis proteins	N/A	N/A
c24426/f5p2/880	880	1362.39	Seita.9G450200.1	ATPase, F0 complex, subunit B/B\', bacterial/chloroplast	N/A	N/A	N/A	K02109	Oxidative phosphorylation ;Photosynthesis ;Photosynthesis proteins	GO:0045263,GO:0015986,GO:0015078	proton-transporting ATP synthase complex, coupling factor F(o);ATP synthesis coupled proton transport;hydrogen ion transmembrane transporter activity
c40193/f26p12/1453	1453	1313.87	Sobic.009G132900.3	pyruvate orthophosphate dikinase	N/A	N/A	N/A	K01006	Pyruvate metabolism ;Carbon fixation in photosynthetic organisms ;Carbon fixation pathways in prokaryotes	GO:0016772,GO:0016310,GO:0016301,GO:0005524,GO:0050242,GO:0006090	transferase activity, transferring phosphorus-containing groups;phosphorylation;kinase activity;ATP binding;pyruvate, phosphate dikinase activity;pyruvate metabolic process
c8197/f1p0/656	656	1298.1	Sobic.002G119500.3	photosystem I subunit E-2	N/A	N/A	N/A	K02693	Photosynthesis ;Photosynthesis proteins	GO:0015979,GO:0009538,GO:0009522	photosynthesis;photosystem I reaction center;photosystem I
c5631/f4p6/1031	1031	1244.35	Sobic.003G234200.6	beta carbonic anhydrase 4	KOG1578	Predicted carbonic anhydrase involved in protection against oxidative damage	P	K01673	Nitrogen metabolism	GO:0008270,GO:0004089	zinc ion binding;carbonate dehydratase activity
c15133/f2p0/1062	1062	1176.26	Zm00008a015155_T01	light harvesting complex of photosystem II 5	N/A	N/A	N/A	K08916	Photosynthesis - antenna proteins ;Photosynthesis proteins	GO:0016020,GO:0009765	membrane;photosynthesis, light harvesting
c22038/f1p1/712	712	1172.08	Sobic.010G160700.1	phosphoenolpyruvate carboxylase 2	N/A	N/A	N/A	K01595	Pyruvate metabolism ;Carbon fixation in photosynthetic organisms ;Carbon fixation pathways in prokaryotes ;Methane metabolism	GO:0015977,GO:0008964,GO:0006099	carbon fixation;phosphoenolpyruvate carboxylase activity;tricarboxylic acid cycle
c32491/f1p0/606	606	1171.1	Sobic.010G000500.1	plastocyanin 1	N/A	N/A	N/A	K02638	Photosynthesis ;Photosynthesis proteins	N/A	N/A
c23053/f1p3/3270	3272	1127.88	Sobic.010G160700.1	phosphoenolpyruvate carboxylase 2	N/A	N/A	N/A	K01595	Pyruvate metabolism ;Carbon fixation in photosynthetic organisms ;Carbon fixation pathways in prokaryotes ;Methane metabolism	GO:0015977,GO:0008964,GO:0006099	carbon fixation;phosphoenolpyruvate carboxylase activity;tricarboxylic acid cycle
c43247/f1p1/781	781	1124.07	Sobic.007G071500.1	photosystem II subunit R	N/A	N/A	N/A	K03541	Photosynthesis ;Photosynthesis proteins	GO:0042651,GO:0015979,GO:0009654,GO:0009523	thylakoid membrane;photosynthesis;photosystem II oxygen evolving complex;photosystem II
c25739/f1p3/1130	1134	1074.44	Sobic.010G160700.1	phosphoenolpyruvate carboxylase 2	N/A	N/A	N/A	K01595	Pyruvate metabolism ;Carbon fixation in photosynthetic organisms ;Carbon fixation pathways in prokaryotes ;Methane metabolism	GO:0015977,GO:0008964,GO:0006099	carbon fixation;phosphoenolpyruvate carboxylase activity;tricarboxylic acid cycle
c38226/f1p3/827	827	1069.69	Sobic.010G000500.1	plastocyanin 1	N/A	N/A	N/A	K02638	Photosynthesis ;Photosynthesis proteins	N/A	N/A
c1471/f8p3/825	827	1065.66	Sobic.002G329600.1	photosystem II subunit Q-2	N/A	N/A	N/A	K08901	Photosynthesis ;Photosynthesis proteins	GO:0019898,GO:0015979,GO:0009654,GO:0009523,GO:0005509	extrinsic component of membrane;photosynthesis;photosystem II oxygen evolving complex;photosystem II;calcium ion binding
c12298/f2p1/671	671	1042.75	LOC_Os01g10400.2	metallothionein 3	N/A	N/A	N/A	N/A	N/A	N/A	N/A
c29702/f1p2/708	707	991.549	Sobic.009G234600.1	photosystem II light harvesting complex gene B1B2	N/A	N/A	N/A	K08912	Photosynthesis - antenna proteins ;Photosynthesis proteins	GO:0016020,GO:0009765	membrane;photosynthesis, light harvesting
c2677/f1p1/660	660	982.677	Zm00008a040408_T01	photosystem I light harvesting complex gene 3	N/A	N/A	N/A	K08909	Photosynthesis - antenna proteins ;Photosynthesis proteins	GO:0016020,GO:0009765	membrane;photosynthesis, light harvesting
c2888/f1p3/808	808	948.43	Sobic.010G160700.1	phosphoenolpyruvate carboxylase 2	N/A	N/A	N/A	K01595	Pyruvate metabolism ;Carbon fixation in photosynthetic organisms ;Carbon fixation pathways in prokaryotes ;Methane metabolism	GO:0015977,GO:0008964,GO:0006099	carbon fixation;phosphoenolpyruvate carboxylase activity;tricarboxylic acid cycle
c24830/f2p1/586	586	931.085	Sobic.003G397600.1	N/A	N/A	N/A	N/A	N/A	N/A	N/A	N/A
c23885/f83p31/1071	1071	930.472	Sobic.007G136900.1	light-harvesting chlorophyll-protein complex I subunit A4	N/A	N/A	N/A	K08910	Photosynthesis - antenna proteins ;Photosynthesis proteins	GO:0016020,GO:0009765	membrane;photosynthesis, light harvesting
c28646/f1p3/1220	1220	912.525	Sobic.001G519800.1	glyceraldehyde-3-phosphate dehydrogenase B subunit	KOG0657	Glyceraldehyde 3-phosphate dehydrogenase	G	K05298	Carbon fixation in photosynthetic organisms	GO:0055114,GO:0016620	oxidation-reduction process;oxidoreductase activity, acting on the aldehyde or oxo group of donors, NAD or NADP as acceptor
c28491/f1p5/1413	1413	894.283	Sobic.003G234200.6	beta carbonic anhydrase 4	KOG1578	Predicted carbonic anhydrase involved in protection against oxidative damage	P	K01673	Nitrogen metabolism	GO:0008270,GO:0004089	zinc ion binding;carbonate dehydratase activity
c40123/f2p10/1211	1211	885.904	Sobic.002G316700.1	ATPase, F1 complex, gamma subunit protein	KOG1531	F0F1-type ATP synthase, gamma subunit	C	K02115	Oxidative phosphorylation ;Photosynthesis ;Photosynthesis proteins	GO:0046961,GO:0046933,GO:0045261,GO:0015986	proton-transporting ATPase activity, rotational mechanism;proton-transporting ATP synthase activity, rotational mechanism;proton-transporting ATP synthase complex, catalytic core F(1);ATP synthesis coupled proton transport
c630/f7p2/739	739	869.175	Sobic.005G228700.1	metallothionein 2B	N/A	N/A	N/A	N/A	N/A	GO:0046872	metal ion binding
c11466/f1p21/1186	1186	846.778	Sobic.009G132900.3	pyruvate orthophosphate dikinase	N/A	N/A	N/A	K01006	Pyruvate metabolism ;Carbon fixation in photosynthetic organisms ;Carbon fixation pathways in prokaryotes	GO:0016772,GO:0016310,GO:0016301,GO:0005524,GO:0050242,GO:0006090	transferase activity, transferring phosphorus-containing groups;phosphorylation;kinase activity;ATP binding;pyruvate, phosphate dikinase activity;pyruvate metabolic process
c33692/f9p10/764	764	844.988	Sobic.005G228700.1	metallothionein 2B	N/A	N/A	N/A	N/A	N/A	GO:0046872	metal ion binding
c22693/f1p0/677	676	835.527	Sobic.006G093900.1	RmlC-like cupins superfamily protein	N/A	N/A	N/A	K06995	Function unknown	N/A	N/A
c33748/f2p1/1060	1061	834.019	Sobic.010G160700.1	phosphoenolpyruvate carboxylase 2	N/A	N/A	N/A	K01595	Pyruvate metabolism ;Carbon fixation in photosynthetic organisms ;Carbon fixation pathways in prokaryotes ;Methane metabolism	GO:0015977,GO:0008964,GO:0006099	carbon fixation;phosphoenolpyruvate carboxylase activity;tricarboxylic acid cycle
c17985/f1p3/637	637	833.086	Sobic.003G431700.1	ferredoxin-NADP(+)-oxidoreductase 1	N/A	N/A	N/A	K02641	Photosynthesis ;Photosynthesis proteins	GO:0055114,GO:0016491	oxidation-reduction process;oxidoreductase activity
c25273/f1p0/586	586	826.238	Sobic.010G160700.1	phosphoenolpyruvate carboxylase 2	N/A	N/A	N/A	K01595	Pyruvate metabolism ;Carbon fixation in photosynthetic organisms ;Carbon fixation pathways in prokaryotes ;Methane metabolism	GO:0015977,GO:0008964,GO:0006099	carbon fixation;phosphoenolpyruvate carboxylase activity;tricarboxylic acid cycle
c17551/f1p0/648	648	809.441	N/A	N/A	N/A	N/A	N/A	N/A	N/A	N/A	N/A
c25144/f1p0/736	736	808.197	Sobic.010G160700.1	phosphoenolpyruvate carboxylase 2	N/A	N/A	N/A	K01595	Pyruvate metabolism ;Carbon fixation in photosynthetic organisms ;Carbon fixation pathways in prokaryotes ;Methane metabolism	GO:0015977,GO:0008964,GO:0006099	carbon fixation;phosphoenolpyruvate carboxylase activity;tricarboxylic acid cycle
c2663/f4p5/1102	1102	776.565	Sobic.005G231500.1	rubisco activase	KOG0651	26S proteasome regulatory complex, ATPase RPT4	O	N/A	N/A	GO:0005524	ATP binding
c38874/f1p2/922	922	752.135	Sobic.009G132900.3	pyruvate orthophosphate dikinase	N/A	N/A	N/A	K01006	Pyruvate metabolism ;Carbon fixation in photosynthetic organisms ;Carbon fixation pathways in prokaryotes	GO:0016772,GO:0016310,GO:0016301,GO:0005524,GO:0050242,GO:0006090	transferase activity, transferring phosphorus-containing groups;phosphorylation;kinase activity;ATP binding;pyruvate, phosphate dikinase activity;pyruvate metabolic process
c39749/f2p39/1639	1639	726.505	Sobic.003G431700.1	ferredoxin-NADP(+)-oxidoreductase 1	N/A	N/A	N/A	K02641	Photosynthesis ;Photosynthesis proteins	GO:0055114,GO:0016491	oxidation-reduction process;oxidoreductase activity
c16980/f1p9/819	824	722.807	Sobic.007G034300.1	N/A	N/A	N/A	N/A	N/A	N/A	N/A	N/A
c19061/f1p0/1047	1047	712.54	Sobic.007G136900.1	light-harvesting chlorophyll-protein complex I subunit A4	N/A	N/A	N/A	K08910	Photosynthesis - antenna proteins ;Photosynthesis proteins	GO:0016020,GO:0009765	membrane;photosynthesis, light harvesting
c14917/f1p1/632	632	711.133	N/A	N/A	N/A	N/A	N/A	N/A	N/A	N/A	N/A
c35271/f1p6/1445	1445	695.053	Sobic.001G519800.1	glyceraldehyde-3-phosphate dehydrogenase B subunit	KOG0657	Glyceraldehyde 3-phosphate dehydrogenase	G	K05298	Carbon fixation in photosynthetic organisms	GO:0055114,GO:0016620	oxidation-reduction process;oxidoreductase activity, acting on the aldehyde or oxo group of donors, NAD or NADP as acceptor
c6088/f3p2/778	778	685.072	Sobic.007G004600.1	2Fe-2S ferredoxin-like superfamily protein	N/A	N/A	N/A	K02639	Photosynthesis ;Photosynthesis proteins	GO:0051536,GO:0009055	iron-sulfur cluster binding;electron carrier activity
c28610/f1p0/724	724	683.725	Sobic.009G229700.1	photosystem I subunit H2	N/A	N/A	N/A	K02695	Photosynthesis ;Photosynthesis proteins	GO:0015979,GO:0009538,GO:0009522	photosynthesis;photosystem I reaction center;photosystem I
c2147/f3p1/753	753	674.339	Zm00008a026110_T01	Translation initiation factor SUI1 family protein	KOG1770	Translation initiation factor 1 (eIF-1/SUI1)	J	K03113	RNA transport ;Translation factors	GO:0006413,GO:0003743	translational initiation;translation initiation factor activity
c23935/f2p0/697	700	636.041	GRMZM5G834952_T01	N/A	N/A	N/A	N/A	N/A	N/A	N/A	N/A
c38230/f1p13/576	576	635.303	Sobic.001G177000.1	photosystem II light harvesting complex gene 2.3	N/A	N/A	N/A	K08913	Photosynthesis - antenna proteins ;Photosynthesis proteins	GO:0016020,GO:0009765	membrane;photosynthesis, light harvesting
c3504/f1p0/678	678	634.921	Pahal.B04133.1	glucose-6-phosphate/phosphate translocator 2	KOG1441	Glucose-6-phosphate/phosphate and phosphoenolpyruvate/phosphate antiporter;Glucose-6-phosphate/phosphate and phosphoenolpyruvate/phosphate antiporter	E;G	K15283	Transporters	N/A	N/A
c37455/f1p1/3213	3221	619.036	Sobic.010G160700.1	phosphoenolpyruvate carboxylase 2	N/A	N/A	N/A	K01595	Pyruvate metabolism ;Carbon fixation in photosynthetic organisms ;Carbon fixation pathways in prokaryotes ;Methane metabolism	GO:0015977,GO:0008964,GO:0006099	carbon fixation;phosphoenolpyruvate carboxylase activity;tricarboxylic acid cycle
c16901/f2p0/866	866	614.135	Zm00008a001659_T01	Histone superfamily protein	KOG1745	Histones H3 and H4	B	K11253	Chromosome and associated proteins ;Exosome ;Transcriptional misregulation in cancers ;Systemic lupus erythematosus ;Alcoholism	GO:0003677,GO:0000786	DNA binding;nucleosome
c24175/f1p0/3267	3269	611.106	Sobic.010G160700.1	phosphoenolpyruvate carboxylase 2	N/A	N/A	N/A	K01595	Pyruvate metabolism ;Carbon fixation in photosynthetic organisms ;Carbon fixation pathways in prokaryotes ;Methane metabolism	GO:0015977,GO:0008964,GO:0006099	carbon fixation;phosphoenolpyruvate carboxylase activity;tricarboxylic acid cycle
c40/f44p34/1468	1468	598.78	Sobic.010G232100.1	polyubiquitin 10	KOG0001	Ubiquitin and ubiquitin-like proteins;Ubiquitin and ubiquitin-like proteins	O;R	K08770	Ubiquitin system ;PPAR signaling pathway	N/A	N/A
c39554/f3p4/994	994	584.667	Sobic.003G238000.1	RAN GTPase 3	KOG0096	GTPase Ran/TC4/GSP1 (nuclear protein transport pathway), small G protein superfamily	U	K07936	Transfer RNA biogenesis ;RNA transport ;Messenger RNA Biogenesis ;Ribosome biogenesis in eukaryotes ;Ribosome biogenesis ;Chromosome and associated proteins ;GTP-binding proteins ;Exosome ;HTLV-I infection ;Epstein-Barr virus infection	GO:0005525	GTP binding
c29192/f2p20/2632	2632	580.506	Sobic.009G132900.3	pyruvate orthophosphate dikinase	N/A	N/A	N/A	K01006	Pyruvate metabolism ;Carbon fixation in photosynthetic organisms ;Carbon fixation pathways in prokaryotes	GO:0016772,GO:0016310,GO:0016301,GO:0005524,GO:0050242,GO:0006090	transferase activity, transferring phosphorus-containing groups;phosphorylation;kinase activity;ATP binding;pyruvate, phosphate dikinase activity;pyruvate metabolic process
c39747/f2p0/870	870	568.336	Pavir.Ba01491.1	N/A	N/A	N/A	N/A	N/A	N/A	N/A	N/A
c33968/f1p4/1994	1994	555.495	Sobic.009G132900.3	pyruvate orthophosphate dikinase	N/A	N/A	N/A	K01006	Pyruvate metabolism ;Carbon fixation in photosynthetic organisms ;Carbon fixation pathways in prokaryotes	GO:0016772,GO:0016310,GO:0016301,GO:0005524,GO:0050242,GO:0006090	transferase activity, transferring phosphorus-containing groups;phosphorylation;kinase activity;ATP binding;pyruvate, phosphate dikinase activity;pyruvate metabolic process
c35609/f1p1/551	551	549.61	Sobic.005G228700.1	metallothionein 2B	N/A	N/A	N/A	N/A	N/A	GO:0046872	metal ion binding
c5449/f1p0/607	608	546.709	Sobic.007G071500.1	photosystem II subunit R	N/A	N/A	N/A	K03541	Photosynthesis ;Photosynthesis proteins	GO:0042651,GO:0015979,GO:0009654,GO:0009523	thylakoid membrane;photosynthesis;photosystem II oxygen evolving complex;photosystem II
c33380/f1p3/673	674	533.637	Sobic.007G071500.1	photosystem II subunit R	N/A	N/A	N/A	K03541	Photosynthesis ;Photosynthesis proteins	GO:0042651,GO:0015979,GO:0009654,GO:0009523	thylakoid membrane;photosynthesis;photosystem II oxygen evolving complex;photosystem II
c32636/f1p9/1199	1199	530.917	Sobic.003G370000.1	Chlorophyll A-B binding family protein	N/A	N/A	N/A	K03542	Photosynthesis ;Photosynthesis proteins	N/A	N/A
c249/f55p46/1086	1086	526.208	Sobic.007G034300.1	N/A	N/A	N/A	N/A	N/A	N/A	N/A	N/A
c40376/f1p2/2254	2253	523.096	Sobic.010G160700.1	phosphoenolpyruvate carboxylase 2	N/A	N/A	N/A	K01595	Pyruvate metabolism ;Carbon fixation in photosynthetic organisms ;Carbon fixation pathways in prokaryotes ;Methane metabolism	GO:0015977,GO:0008964,GO:0006099	carbon fixation;phosphoenolpyruvate carboxylase activity;tricarboxylic acid cycle
c2900/f2p18/1499	1499	521.461	Sobic.003G431700.1	ferredoxin-NADP(+)-oxidoreductase 1	N/A	N/A	N/A	K02641	Photosynthesis ;Photosynthesis proteins	GO:0055114,GO:0016491	oxidation-reduction process;oxidoreductase activity
c15037/f3p0/689	689	521.157	Sobic.005G228700.1	metallothionein 2B	N/A	N/A	N/A	N/A	N/A	GO:0046872	metal ion binding
c33915/f8p30/1240	1240	520.706	Zm00008a015155_T01	light harvesting complex of photosystem II 5	N/A	N/A	N/A	K08916	Photosynthesis - antenna proteins ;Photosynthesis proteins	GO:0016020,GO:0009765	membrane;photosynthesis, light harvesting
c15000/f2p0/696	696	520.699	Sobic.007G004600.1	2Fe-2S ferredoxin-like superfamily protein	N/A	N/A	N/A	K02639	Photosynthesis ;Photosynthesis proteins	GO:0051536,GO:0009055	iron-sulfur cluster binding;electron carrier activity
c40427/f2p3/889	889	520.672	Sobic.002G352100.1	photosystem I light harvesting complex gene 2	N/A	N/A	N/A	K08908	Photosynthesis - antenna proteins ;Photosynthesis proteins	GO:0016020,GO:0009765	membrane;photosynthesis, light harvesting
c20055/f2p3/770	770	506.284	Sobic.003G431700.1	ferredoxin-NADP(+)-oxidoreductase 1	N/A	N/A	N/A	K02641	Photosynthesis ;Photosynthesis proteins	GO:0055114,GO:0016491	oxidation-reduction process;oxidoreductase activity
c9626/f2p21/970	970	505.414	Sobic.005G042000.1	ribulose bisphosphate carboxylase small chain 1A	N/A	N/A	N/A	K01602	Glyoxylate and dicarboxylate metabolism ;Carbon fixation in photosynthetic organisms	N/A	N/A
c32965/f1p0/543	543	504.497	Sobic.003G397600.1	N/A	N/A	N/A	N/A	N/A	N/A	N/A	N/A
c34556/f2p19/1107	1107	502.954	Sobic.010G232100.3	polyubiquitin 10	KOG0005,KOG0001	Ubiquitin-like protein;Ubiquitin-like protein;Ubiquitin and ubiquitin-like proteins;Ubiquitin and ubiquitin-like proteins	O;D;O;R	K08770,K04551	Ubiquitin system ;PPAR signaling pathway ;Ubiquitin system ;Endocytosis ;Exosome ;Mitophagy - animal ;Parkinson's disease ;Kaposi's sarcoma-associated herpesvirus infection	N/A	N/A
c35943/f2p10/951	951	502.794	Sobic.002G030200.1	photosystem II subunit P-1	N/A	N/A	N/A	K02717	Photosynthesis ;Photosynthesis proteins	GO:0019898,GO:0015979,GO:0009654,GO:0009523,GO:0005509	extrinsic component of membrane;photosynthesis;photosystem II oxygen evolving complex;photosystem II;calcium ion binding
c14052/f2p1/713	713	501.887	Pavir.J05563.1	Histone superfamily protein	KOG1745	Histones H3 and H4	B	K11253	Chromosome and associated proteins ;Exosome ;Transcriptional misregulation in cancers ;Systemic lupus erythematosus ;Alcoholism	GO:0003677,GO:0000786	DNA binding;nucleosome
c478/f37p35/1167	1167	500.574	Sobic.008G033200.2	Aluminium induced protein with YGL and LRDR motifs	N/A	N/A	N/A	N/A	N/A	N/A	N/A
c16200/f1p2/683	683	499.85	Sobic.001G070500.1	photosystem I subunit F	N/A	N/A	N/A	K02694	Photosynthesis ;Photosynthesis proteins	GO:0015979,GO:0009538,GO:0009522	photosynthesis;photosystem I reaction center;photosystem I
c22708/f1p3/2277	2277	498.413	Sobic.010G160700.1	phosphoenolpyruvate carboxylase 2	N/A	N/A	N/A	K01595	Pyruvate metabolism ;Carbon fixation in photosynthetic organisms ;Carbon fixation pathways in prokaryotes ;Methane metabolism	GO:0015977,GO:0008964,GO:0006099	carbon fixation;phosphoenolpyruvate carboxylase activity;tricarboxylic acid cycle
c39888/f5p5/767	767	497.832	Sobic.005G228700.1	metallothionein 2B	N/A	N/A	N/A	N/A	N/A	GO:0046872	metal ion binding
c17479/f1p35/1237	1237	494.08	Sobic.007G136900.1	light-harvesting chlorophyll-protein complex I subunit A4	N/A	N/A	N/A	K08910	Photosynthesis - antenna proteins ;Photosynthesis proteins	GO:0016020,GO:0009765	membrane;photosynthesis, light harvesting
c25114/f1p1/723	723	490.462	GRMZM2G171648_T01	N/A	N/A	N/A	N/A	N/A	N/A	N/A	N/A
c12898/f3p12/1287	1287	490.018	Sobic.003G234200.6	beta carbonic anhydrase 4	KOG1578	Predicted carbonic anhydrase involved in protection against oxidative damage	P	K01673	Nitrogen metabolism	GO:0008270,GO:0004089	zinc ion binding;carbonate dehydratase activity
c28846/f1p3/692	692	485.943	Sobic.003G036200.1	NADP-malic enzyme 4	N/A	N/A	N/A	K00029	Pyruvate metabolism ;Carbon fixation in photosynthetic organisms	GO:0055114,GO:0004471,GO:0051287	oxidation-reduction process;malate dehydrogenase (decarboxylating) (NAD+) activity;NAD binding
c40332/f24p49/1611	1611	483.27	Sobic.008G053200.1	fructose-bisphosphate aldolase 2	N/A	N/A	N/A	K01623	Glycolysis / Gluconeogenesis ;Pentose phosphate pathway ;Fructose and mannose metabolism ;Carbon fixation in photosynthetic organisms ;Methane metabolism ;Membrane trafficking ;Chromosome and associated proteins ;Exosome	GO:0006096,GO:0004332	glycolytic process;fructose-bisphosphate aldolase activity
c13732/f1p0/671	671	474.578	Sobic.008G063500.1	photosystem I reaction center subunit PSI-N, chloroplast, putative / PSI-N, putative (PSAN)	N/A	N/A	N/A	K02701	Photosynthesis ;Photosynthesis proteins	GO:0042651,GO:0015979,GO:0009522,GO:0005516	thylakoid membrane;photosynthesis;photosystem I;calmodulin binding
c25954/f1p16/1192	1192	473.177	Zm00008a015155_T01	light harvesting complex of photosystem II 5	N/A	N/A	N/A	K08916	Photosynthesis - antenna proteins ;Photosynthesis proteins	GO:0016020,GO:0009765	membrane;photosynthesis, light harvesting
c4331/f1p1/1207	1207	470.627	Sobic.010G241000.1	photosystem II subunit O-2	N/A	N/A	N/A	K02716	Photosynthesis ;Photosynthesis proteins	GO:0042549,GO:0019898,GO:0015979,GO:0009654,GO:0009523,GO:0005509	photosystem II stabilization;extrinsic component of membrane;photosynthesis;photosystem II oxygen evolving complex;photosystem II;calcium ion binding
c29622/f1p8/3360	3364	468.75	Sobic.009G132900.1	pyruvate orthophosphate dikinase	N/A	N/A	N/A	K01006	Pyruvate metabolism ;Carbon fixation in photosynthetic organisms ;Carbon fixation pathways in prokaryotes	GO:0016772,GO:0016310,GO:0016301,GO:0005524,GO:0050242,GO:0006090	transferase activity, transferring phosphorus-containing groups;phosphorylation;kinase activity;ATP binding;pyruvate, phosphate dikinase activity;pyruvate metabolic process
c18226/f1p17/1069	1069	468.343	Zm00008a015155_T01	light harvesting complex of photosystem II 5	N/A	N/A	N/A	K08916	Photosynthesis - antenna proteins ;Photosynthesis proteins	GO:0016020,GO:0009765	membrane;photosynthesis, light harvesting
c9159/f1p12/1073	1073	466.113	Zm00008a040408_T01	photosystem I light harvesting complex gene 3	N/A	N/A	N/A	K08909	Photosynthesis - antenna proteins ;Photosynthesis proteins	GO:0016020,GO:0009765	membrane;photosynthesis, light harvesting
c24598/f2p4/2453	2455	465.465	Sobic.010G160700.1	phosphoenolpyruvate carboxylase 2	N/A	N/A	N/A	K01595	Pyruvate metabolism ;Carbon fixation in photosynthetic organisms ;Carbon fixation pathways in prokaryotes ;Methane metabolism	GO:0015977,GO:0008964,GO:0006099	carbon fixation;phosphoenolpyruvate carboxylase activity;tricarboxylic acid cycle
c28189/f1p0/814	814	464.686	Sobic.003G419900.1	photosystem II reaction center PSB28 protein	N/A	N/A	N/A	K08903	Photosynthesis ;Photosynthesis proteins	GO:0016020,GO:0015979,GO:0009654,GO:0009523	membrane;photosynthesis;photosystem II oxygen evolving complex;photosystem II
c1860/f1p8/1017	1017	459.74	Sobic.001G177000.1	photosystem II light harvesting complex gene 2.3	N/A	N/A	N/A	K08913	Photosynthesis - antenna proteins ;Photosynthesis proteins	GO:0016020,GO:0009765	membrane;photosynthesis, light harvesting
c23686/f1p0/861	860	456.806	Zm00008a020718_T01	translationally controlled tumor protein	KOG1727	Microtubule-binding protein (translationally controlled tumor protein);Microtubule-binding protein (translationally controlled tumor protein)	Z;D	N/A	N/A	N/A	N/A
c44017/f1p23/2129	2129	453.112	Sobic.003G350700.1	heat shock protein 70	N/A	N/A	N/A	K03283	Protein phosphatase and associated proteins ;Spliceosome ;Spliceosome ;Ribosome biogenesis ;Mitochondrial biogenesis ;Chaperones and folding catalysts ;Protein processing in endoplasmic reticulum ;Membrane trafficking ;Proteasome ;MAPK signaling pathway ;Cell adhesion molecules and their ligands ;Endocytosis ;Exosome ;Antigen processing and presentation ;Estrogen signaling pathway ;Longevity regu…	N/A	N/A
c19349/f1p0/638	638	450.205	Sobic.002G242000.1	photosystem I subunit G	N/A	N/A	N/A	K08905	Photosynthesis ;Photosynthesis proteins	GO:0016020,GO:0015979,GO:0009522	membrane;photosynthesis;photosystem I
c24015/f1p3/504	504	449.382	Sobic.003G437800.1	N/A	N/A	N/A	N/A	N/A	N/A	GO:0006950	response to stress
c13805/f4p3/877	877	444.467	Sobic.010G000500.1	plastocyanin 1	N/A	N/A	N/A	K02638	Photosynthesis ;Photosynthesis proteins	N/A	N/A
c33768/f1p4/939	939	441.953	Sobic.008G053200.1	fructose-bisphosphate aldolase 2	N/A	N/A	N/A	K01623	Glycolysis / Gluconeogenesis ;Pentose phosphate pathway ;Fructose and mannose metabolism ;Carbon fixation in photosynthetic organisms ;Methane metabolism ;Membrane trafficking ;Chromosome and associated proteins ;Exosome	GO:0006096,GO:0004332	glycolytic process;fructose-bisphosphate aldolase activity
c12367/f1p9/816	816	430.89	Sobic.002G288300.1	photosystem II light harvesting complex gene B1B2	N/A	N/A	N/A	K08912	Photosynthesis - antenna proteins ;Photosynthesis proteins	GO:0016020,GO:0009765	membrane;photosynthesis, light harvesting
c15921/f2p6/1045	1045	430.601	Sobic.004G050100.4	polyubiquitin 10	KOG0005,KOG0001	Ubiquitin-like protein;Ubiquitin-like protein;Ubiquitin and ubiquitin-like proteins;Ubiquitin and ubiquitin-like proteins	O;D;O;R	K08770,K04551	Ubiquitin system ;PPAR signaling pathway ;Ubiquitin system ;Endocytosis ;Exosome ;Mitophagy - animal ;Parkinson's disease ;Kaposi's sarcoma-associated herpesvirus infection	N/A	N/A
c17872/f3p1/652	652	427.33	N/A	N/A	N/A	N/A	N/A	N/A	N/A	N/A	N/A
c7759/f1p10/2626	2625	426.614	Sobic.010G160700.1	phosphoenolpyruvate carboxylase 2	N/A	N/A	N/A	K01595	Pyruvate metabolism ;Carbon fixation in photosynthetic organisms ;Carbon fixation pathways in prokaryotes ;Methane metabolism	GO:0015977,GO:0008964,GO:0006099	carbon fixation;phosphoenolpyruvate carboxylase activity;tricarboxylic acid cycle
c8440/f35p22/1497	1496	425.902	Sobic.003G431700.1	ferredoxin-NADP(+)-oxidoreductase 1	N/A	N/A	N/A	K02641	Photosynthesis ;Photosynthesis proteins	GO:0055114,GO:0016491	oxidation-reduction process;oxidoreductase activity
c12614/f1p3/1049	1049	421.738	Sobic.001G426000.1	HSP20-like chaperones superfamily protein	KOG0710	Molecular chaperone (small heat-shock protein Hsp26/Hsp42)	O	K13993	Chaperones and folding catalysts ;Protein processing in endoplasmic reticulum	N/A	N/A
c40290/f7p10/1420	1420	421.506	Sobic.008G064700.1	galactose-1-phosphate guanylyltransferase (GDP)s;GDP-D-glucose phosphorylases;quercetin 4\'-O-glucosyltransferases	KOG2720	Predicted hydrolase (HIT family)	R	K14190	Ascorbate and aldarate metabolism	GO:0080048	GDP-D-glucose phosphorylase activity
c13625/f10p8/1111	1111	419.684	Sobic.002G339200.2	light-harvesting chlorophyll B-binding protein 3	N/A	N/A	N/A	K08914	Photosynthesis - antenna proteins ;Photosynthesis proteins	GO:0016020,GO:0009765	membrane;photosynthesis, light harvesting
c16387/f1p22/1248	1249	417.303	Sobic.003G431700.1	ferredoxin-NADP(+)-oxidoreductase 1	N/A	N/A	N/A	K02641	Photosynthesis ;Photosynthesis proteins	GO:0055114,GO:0016491	oxidation-reduction process;oxidoreductase activity
c39535/f8p21/1208	1208	415.417	Sobic.010G232100.1	polyubiquitin 10	KOG0001	Ubiquitin and ubiquitin-like proteins;Ubiquitin and ubiquitin-like proteins	O;R	K08770	Ubiquitin system ;PPAR signaling pathway	N/A	N/A
c16286/f1p5/2371	2379	415.228	Sobic.010G160700.1	phosphoenolpyruvate carboxylase 2	N/A	N/A	N/A	K01595	Pyruvate metabolism ;Carbon fixation in photosynthetic organisms ;Carbon fixation pathways in prokaryotes ;Methane metabolism	GO:0015977,GO:0008964,GO:0006099	carbon fixation;phosphoenolpyruvate carboxylase activity;tricarboxylic acid cycle
c1596/f3p4/1085	1086	414.533	Sobic.002G112400.4	PGR5-LIKE A	N/A	N/A	N/A	N/A	N/A	N/A	N/A
c2447/f4p6/824	824	409.223	Sobic.003G064300.2	N/A	N/A	N/A	N/A	N/A	N/A	N/A	N/A
c33905/f5p24/1177	1177	408.816	Sobic.010G005500.1	ferredoxin-NADP(+)-oxidoreductase 2	N/A	N/A	N/A	K02641	Photosynthesis ;Photosynthesis proteins	GO:0055114,GO:0016491	oxidation-reduction process;oxidoreductase activity
c40221/f4p8/756	750	405.452	Sobic.005G228700.1	metallothionein 2B	N/A	N/A	N/A	N/A	N/A	GO:0046872	metal ion binding
c21918/f1p0/753	753	402.303	Sobic.008G185900.1	cold, circadian rhythm, and rna binding 2	N/A	N/A	N/A	N/A	N/A	GO:0003676	nucleic acid binding
c5627/f1p27/1097	1097	401.505	Sobic.002G338000.1	light harvesting complex photosystem II	N/A	N/A	N/A	K08915	Photosynthesis - antenna proteins ;Photosynthesis proteins	GO:0016020,GO:0009765	membrane;photosynthesis, light harvesting
c13306/f5p1/897	897	399.452	Sobic.001G046900.1	photosystem I subunit D-2	N/A	N/A	N/A	K02692	Photosynthesis ;Photosynthesis proteins	GO:0015979,GO:0009538,GO:0009522	photosynthesis;photosystem I reaction center;photosystem I
c22507/f2p6/1171	1171	398.804	Sobic.004G050100.5	polyubiquitin 10	KOG0001	Ubiquitin and ubiquitin-like proteins;Ubiquitin and ubiquitin-like proteins	O;R	K08770	Ubiquitin system ;PPAR signaling pathway	N/A	N/A
c22955/f1p12/625	625	397.555	Sobic.010G241000.1	photosystem II subunit O-2	N/A	N/A	N/A	K02716	Photosynthesis ;Photosynthesis proteins	GO:0042549,GO:0019898,GO:0015979,GO:0009654,GO:0009523,GO:0005509	photosystem II stabilization;extrinsic component of membrane;photosynthesis;photosystem II oxygen evolving complex;photosystem II;calcium ion binding
c38951/f1p9/1413	1413	397.014	Sobic.001G519800.1	glyceraldehyde-3-phosphate dehydrogenase B subunit	KOG0657	Glyceraldehyde 3-phosphate dehydrogenase	G	K05298	Carbon fixation in photosynthetic organisms	GO:0055114,GO:0016620	oxidation-reduction process;oxidoreductase activity, acting on the aldehyde or oxo group of donors, NAD or NADP as acceptor
c33754/f3p3/1368	1368	392.063	Sobic.005G231500.1	rubisco activase	KOG0651	26S proteasome regulatory complex, ATPase RPT4	O	N/A	N/A	GO:0005524	ATP binding
c33265/f8p26/1396	1396	388.917	Sobic.003G431700.1	ferredoxin-NADP(+)-oxidoreductase 1	N/A	N/A	N/A	K02641	Photosynthesis ;Photosynthesis proteins	GO:0055114,GO:0016491	oxidation-reduction process;oxidoreductase activity
c37543/f1p1/841	842	388.085	Sobic.005G121200.1	HVA22 homologue E	N/A	N/A	N/A	K17279	Exosome	N/A	N/A
c26486/f1p2/1062	1063	386.636	Sobic.010G262500.1	glyceraldehyde-3-phosphate dehydrogenase C subunit 1	KOG0657	Glyceraldehyde 3-phosphate dehydrogenase	G	K00134	Glycolysis / Gluconeogenesis ;Carbon fixation in photosynthetic organisms ;Membrane trafficking ;HIF-1 signaling pathway ;Exosome ;Alzheimer's disease	GO:0055114,GO:0016620	oxidation-reduction process;oxidoreductase activity, acting on the aldehyde or oxo group of donors, NAD or NADP as acceptor
c38383/f1p2/865	866	384.277	Sobic.010G000500.1	plastocyanin 1	N/A	N/A	N/A	K02638	Photosynthesis ;Photosynthesis proteins	N/A	N/A
c1018/f9p5/941	948	381.722	Sobic.009G143100.1	photosynthetic electron transfer C	KOG1671	Ubiquinol cytochrome c reductase, subunit RIP1	C	K02636	Photosynthesis ;Photosynthesis proteins	GO:0055114,GO:0051537,GO:0016491,GO:0042651,GO:0009496,GO:0016679	oxidation-reduction process;2 iron, 2 sulfur cluster binding;oxidoreductase activity;thylakoid membrane;plastoquinol--plastocyanin reductase activity;oxidoreductase activity, acting on diphenols and related substances as donors
c955/f23p9/958	958	376.856	Sobic.003G052500.1	photosystem I subunit l	N/A	N/A	N/A	K02699	Photosynthesis ;Photosynthesis proteins	GO:0015979,GO:0009538,GO:0009522	photosynthesis;photosystem I reaction center;photosystem I
c28917/f1p17/1764	1764	376.27	Sobic.001G472800.1	myo-inositol-1-phosphate synthase 2	N/A	N/A	N/A	K01858	Inositol phosphate metabolism ;Streptomycin biosynthesis	GO:0008654,GO:0006021,GO:0004512	phospholipid biosynthetic process;inositol biosynthetic process;inositol-3-phosphate synthase activity
c26931/f2p2/769	772	374.122	Pavir.J05563.1	Histone superfamily protein	KOG1745	Histones H3 and H4	B	K11253	Chromosome and associated proteins ;Exosome ;Transcriptional misregulation in cancers ;Systemic lupus erythematosus ;Alcoholism	GO:0003677,GO:0000786	DNA binding;nucleosome
c10435/f1p0/688	688	371.255	GRMZM2G363971_T01	N/A	N/A	N/A	N/A	N/A	N/A	N/A	N/A
c28799/f1p0/647	647	367.531	Sobic.003G437600.2	thioredoxin Y1	KOG0910	Thioredoxin-like protein	O	N/A	N/A	GO:0045454,GO:0015035,GO:0006662	cell redox homeostasis;protein disulfide oxidoreductase activity;glycerol ether metabolic process
c11014/f1p5/900	900	364.799	GRMZM5G862663_T01	N/A	N/A	N/A	N/A	N/A	N/A	N/A	N/A
c6691/f1p6/1150	1150	363.778	Sobic.002G047400.1	protein containing PDZ domain, a K-box domain, and a TPR region	N/A	N/A	N/A	N/A	N/A	N/A	N/A
c24754/f5p9/1225	1225	363.72	GRMZM2G154397_T01	Adenosylmethionine decarboxylase family protein	KOG0788	S-adenosylmethionine decarboxylase	T	K01611	Cysteine and methionine metabolism ;Arginine and proline metabolism	GO:0008295,GO:0006597,GO:0004014	spermidine biosynthetic process;spermine biosynthetic process;adenosylmethionine decarboxylase activity
c14051/f3p6/962	963	361.758	Sobic.003G052500.1	photosystem I subunit l	N/A	N/A	N/A	K02699	Photosynthesis ;Photosynthesis proteins	GO:0015979,GO:0009538,GO:0009522	photosynthesis;photosystem I reaction center;photosystem I
c39777/f8p2/745	746	361.054	GRMZM2G171648_T01	N/A	N/A	N/A	N/A	N/A	N/A	N/A	N/A
c7845/f2p1/804	806	360.859	Sobic.001G070000.2	actin depolymerizing factor 6	KOG1735	Actin depolymerizing factor	Z	K05765	Membrane trafficking ;Exosome ;Regulation of actin cytoskeleton ;Cytoskeleton proteins ;Fc gamma R-mediated phagocytosis ;Axon guidance ;Pertussis	GO:0005622,GO:0003779,GO:0030042,GO:0015629	intracellular;actin binding;actin filament depolymerization;actin cytoskeleton
c32261/f1p1/3669	3687	360.136	Sobic.010G160700.1	phosphoenolpyruvate carboxylase 2	N/A	N/A	N/A	K01595	Pyruvate metabolism ;Carbon fixation in photosynthetic organisms ;Carbon fixation pathways in prokaryotes ;Methane metabolism	GO:0015977,GO:0008964,GO:0006099	carbon fixation;phosphoenolpyruvate carboxylase activity;tricarboxylic acid cycle
c5181/f2p12/1053	1053	359.242	Zm00008a040408_T01	photosystem I light harvesting complex gene 3	N/A	N/A	N/A	K08909	Photosynthesis - antenna proteins ;Photosynthesis proteins	GO:0016020,GO:0009765	membrane;photosynthesis, light harvesting
c27295/f1p0/598	598	352.98	Sobic.010G160700.1	phosphoenolpyruvate carboxylase 2	N/A	N/A	N/A	K01595	Pyruvate metabolism ;Carbon fixation in photosynthetic organisms ;Carbon fixation pathways in prokaryotes ;Methane metabolism	GO:0015977,GO:0008964,GO:0006099	carbon fixation;phosphoenolpyruvate carboxylase activity;tricarboxylic acid cycle
c39731/f93p50/1160	1160	352.27	Sobic.001G177000.1	photosystem II light harvesting complex gene 2.3	N/A	N/A	N/A	K08913	Photosynthesis - antenna proteins ;Photosynthesis proteins	GO:0016020,GO:0009765	membrane;photosynthesis, light harvesting
c6395/f19p156/1351	1351	352.13	GRMZM2G010884_T01	photosystem I light harvesting complex gene 3	N/A	N/A	N/A	K08909	Photosynthesis - antenna proteins ;Photosynthesis proteins	GO:0016020,GO:0009765	membrane;photosynthesis, light harvesting
c18456/f1p0/925	925	352.093	GRMZM2G308944_T01	photosystem II BY	N/A	N/A	N/A	K02723	Photosynthesis ;Photosynthesis proteins	GO:0030145,GO:0016021,GO:0015979,GO:0009523	manganese ion binding;integral component of membrane;photosynthesis;photosystem II
c11812/f1p1/586	587	352.032	Sobic.002G242000.1	photosystem I subunit G	N/A	N/A	N/A	K08905	Photosynthesis ;Photosynthesis proteins	GO:0016020,GO:0015979,GO:0009522	membrane;photosynthesis;photosystem I
c3416/f2p1/766	766	351.456	Sobic.008G030600.1	lipid transfer protein 3	N/A	N/A	N/A	N/A	N/A	N/A	N/A
c39443/f9p5/995	995	351.126	Sobic.010G190600.4	A20/AN1-like zinc finger family protein	KOG3173	Predicted Zn-finger protein	R	N/A	N/A	GO:0008270,GO:0003677	zinc ion binding;DNA binding
c39522/f2p2/821	821	348.534	Sobic.003G052500.1	photosystem I subunit l	N/A	N/A	N/A	K02699	Photosynthesis ;Photosynthesis proteins	GO:0015979,GO:0009538,GO:0009522	photosynthesis;photosystem I reaction center;photosystem I
c26778/f1p1/687	687	345.56	Sobic.001G426000.1	HSP20-like chaperones superfamily protein	KOG0710	Molecular chaperone (small heat-shock protein Hsp26/Hsp42)	O	K13993	Chaperones and folding catalysts ;Protein processing in endoplasmic reticulum	N/A	N/A
c34119/f4p9/1119	1119	342.807	Sobic.002G339200.2	light-harvesting chlorophyll B-binding protein 3	N/A	N/A	N/A	K08914	Photosynthesis - antenna proteins ;Photosynthesis proteins	GO:0016020,GO:0009765	membrane;photosynthesis, light harvesting
c8391/f3p1/734	734	341.94	Sobic.005G228700.1	metallothionein 2B	N/A	N/A	N/A	N/A	N/A	GO:0046872	metal ion binding
c24062/f2p2/998	998	341.824	Sobic.003G234400.4	beta carbonic anhydrase 4	KOG1578	Predicted carbonic anhydrase involved in protection against oxidative damage	P	K01673	Nitrogen metabolism	GO:0008270,GO:0004089	zinc ion binding;carbonate dehydratase activity
c26344/f3p1/604	605	340.8	Sobic.003G397500.1	N/A	N/A	N/A	N/A	N/A	N/A	N/A	N/A
c22734/f2p0/835	835	340.471	N/A	N/A	N/A	N/A	N/A	N/A	N/A	N/A	N/A
c34224/f3p1/1043	1043	338.772	Sobic.002G421300.2	hydroxyproline-rich glycoprotein family protein	N/A	N/A	N/A	N/A	N/A	N/A	N/A
c24465/f5p47/1754	1754	338.585	Sobic.003G234200.6	beta carbonic anhydrase 4	KOG1578	Predicted carbonic anhydrase involved in protection against oxidative damage	P	K01673	Nitrogen metabolism	GO:0008270,GO:0004089	zinc ion binding;carbonate dehydratase activity
c37949/f1p0/1082	1082	338.498	Sobic.001G064500.1	DNAJ homologue 2	KOG0712	Molecular chaperone (DnaJ superfamily)	O	K09503	Mitochondrial biogenesis ;Chaperones and folding catalysts ;Protein processing in endoplasmic reticulum	GO:0051082,GO:0031072	unfolded protein binding;heat shock protein binding
c13935/f2p3/984	984	338.031	Sobic.003G243600.1	ubiquitin conjugating enzyme 9	KOG0417	Ubiquitin-protein ligase	O	K06689	Protein processing in endoplasmic reticulum ;Ubiquitin mediated proteolysis ;Ubiquitin system ;MAPK signaling pathway - fly ;Toll and Imd signaling pathway	N/A	N/A
c39949/f9p2/961	961	337.997	Sobic.003G234400.4	beta carbonic anhydrase 4	KOG1578	Predicted carbonic anhydrase involved in protection against oxidative damage	P	K01673	Nitrogen metabolism	GO:0008270,GO:0004089	zinc ion binding;carbonate dehydratase activity
c29837/f1p1/710	710	336.552	Sobic.001G094500.1	histone H2A 11	KOG1757	Histone 2A	B	K11251	Chromosome and associated proteins ;Exosome ;Necroptosis ;Systemic lupus erythematosus ;Alcoholism	GO:0003677	DNA binding
c1019/f12p17/979	979	336.04	Sobic.004G056900.1	photosystem I light harvesting complex gene 1	N/A	N/A	N/A	K08907	Photosynthesis - antenna proteins ;Photosynthesis proteins	GO:0016020,GO:0009765	membrane;photosynthesis, light harvesting
c8268/f1p0/1695	1695	332.455	Sobic.010G160700.1	phosphoenolpyruvate carboxylase 2	N/A	N/A	N/A	K01595	Pyruvate metabolism ;Carbon fixation in photosynthetic organisms ;Carbon fixation pathways in prokaryotes ;Methane metabolism	GO:0015977,GO:0008964,GO:0006099	carbon fixation;phosphoenolpyruvate carboxylase activity;tricarboxylic acid cycle
c3069/f1p8/1088	1088	330.566	Sobic.008G033200.2	Aluminium induced protein with YGL and LRDR motifs	N/A	N/A	N/A	N/A	N/A	N/A	N/A
c34220/f1p3/998	998	329.555	Sobic.003G234200.6	beta carbonic anhydrase 4	KOG1578	Predicted carbonic anhydrase involved in protection against oxidative damage	P	K01673	Nitrogen metabolism	GO:0008270,GO:0004089	zinc ion binding;carbonate dehydratase activity
c10257/f1p19/936	936	329.302	Sobic.004G288700.1	plasma membrane intrinsic protein 1;4	KOG0223	Aquaporin (major intrinsic protein family)	G	K09872	Transporters	GO:0016020,GO:0006810,GO:0005215	membrane;transport;transporter activity
c35513/f1p0/841	843	329.118	Sobic.003G402600.1	small ubiquitin-like modifier 1	KOG1769	Ubiquitin-like proteins	O	K12160	RNA transport ;Messenger RNA Biogenesis ;Mitochondrial biogenesis ;Ubiquitin system ;Cytoskeleton proteins ;Fluid shear stress and atherosclerosis	N/A	N/A
c30763/f1p14/1417	1417	328.057	Sobic.004G050000.1	polyubiquitin 10	KOG0001	Ubiquitin and ubiquitin-like proteins;Ubiquitin and ubiquitin-like proteins	O;R	K08770	Ubiquitin system ;PPAR signaling pathway	N/A	N/A
c32591/f1p3/760	760	327.693	Sobic.009G132900.3	pyruvate orthophosphate dikinase	N/A	N/A	N/A	K01006	Pyruvate metabolism ;Carbon fixation in photosynthetic organisms ;Carbon fixation pathways in prokaryotes	GO:0016772,GO:0016310,GO:0016301,GO:0005524,GO:0050242,GO:0006090	transferase activity, transferring phosphorus-containing groups;phosphorylation;kinase activity;ATP binding;pyruvate, phosphate dikinase activity;pyruvate metabolic process
c17992/f2p7/1484	1484	320.833	Sobic.010G272800.1	FtsH extracellular protease family	N/A	N/A	N/A	K03798	Peptidases ;Chaperones and folding catalysts	GO:0016887,GO:0005524,GO:0006508,GO:0004222	ATPase activity;ATP binding;proteolysis;metalloendopeptidase activity
c28515/f1p5/1471	1471	320.388	Sobic.005G231600.1	rubisco activase	KOG0651	26S proteasome regulatory complex, ATPase RPT4	O	N/A	N/A	GO:0005524	ATP binding
c542/f29p11/1225	1225	318.759	Sobic.003G403700.1	polyubiquitin 10	KOG0005,KOG0001	Ubiquitin-like protein;Ubiquitin-like protein;Ubiquitin and ubiquitin-like proteins;Ubiquitin and ubiquitin-like proteins	O;D;O;R	K08770,K04551	Ubiquitin system ;PPAR signaling pathway ;Ubiquitin system ;Endocytosis ;Exosome ;Mitophagy - animal ;Parkinson's disease ;Kaposi's sarcoma-associated herpesvirus infection	N/A	N/A
c40485/f2p10/976	971	318.047	GRMZM2G033885_T01	light harvesting complex photosystem II	N/A	N/A	N/A	K08915	Photosynthesis - antenna proteins ;Photosynthesis proteins	GO:0016020,GO:0009765	membrane;photosynthesis, light harvesting
c4006/f3p0/868	868	317.661	GRMZM2G402092_T01	N/A	N/A	N/A	N/A	N/A	N/A	N/A	N/A
c2216/f3p4/933	933	316.926	Sobic.003G052500.1	photosystem I subunit l	N/A	N/A	N/A	K02699	Photosynthesis ;Photosynthesis proteins	GO:0015979,GO:0009538,GO:0009522	photosynthesis;photosystem I reaction center;photosystem I
c29029/f1p2/1179	1179	315.213	Sobic.001G180200.1	Peroxisomal membrane 22 kDa (Mpv17/PMP22) family protein	KOG1944	Peroxisomal membrane protein MPV17 and related proteins	R	K13348	Peroxisome	GO:0016021	integral component of membrane
c6814/f2p3/1069	1069	314.695	Sobic.007G136900.1	light-harvesting chlorophyll-protein complex I subunit A4	N/A	N/A	N/A	K08910	Photosynthesis - antenna proteins ;Photosynthesis proteins	GO:0016020,GO:0009765	membrane;photosynthesis, light harvesting
c32681/f2p0/850	849	314.457	Sobic.001G390300.1	calmodulin 5	KOG0027	Calmodulin and related proteins (EF-Hand superfamily)	T	K02183	Protein phosphatase and associated proteins ;Membrane trafficking ;Chromosome and associated proteins ;Ras signaling pathway ;Rap1 signaling pathway ;MAPK signaling pathway - plant ;Apelin signaling pathway ;Calcium signaling pathway ;Phosphatidylinositol signaling system ;cAMP signaling pathway ;cGMP - PKG signaling pathway ;Exosome ;Oocyte meiosis ;Cellular senescence ;Insulin signaling pathway…	N/A	N/A
c4622/f1p21/1624	1625	309.858	Sobic.008G053200.1	fructose-bisphosphate aldolase 2	N/A	N/A	N/A	K01623	Glycolysis / Gluconeogenesis ;Pentose phosphate pathway ;Fructose and mannose metabolism ;Carbon fixation in photosynthetic organisms ;Methane metabolism ;Membrane trafficking ;Chromosome and associated proteins ;Exosome	GO:0006096,GO:0004332	glycolytic process;fructose-bisphosphate aldolase activity
c35377/f1p3/1222	1222	309.805	Sobic.004G202200.1	RAB GTPase homolog E1B	N/A	N/A	N/A	K02358	Mitochondrial biogenesis ;Translation factors ;Exosome	GO:0005525	GTP binding
c28832/f1p6/1399	1399	306.997	Sobic.001G064500.1	DNAJ homologue 2	KOG0712	Molecular chaperone (DnaJ superfamily)	O	K09503	Mitochondrial biogenesis ;Chaperones and folding catalysts ;Protein processing in endoplasmic reticulum	GO:0051082,GO:0031072	unfolded protein binding;heat shock protein binding
c44352/f1p0/673	673	305.798	Sobic.008G063500.1	photosystem I reaction center subunit PSI-N, chloroplast, putative / PSI-N, putative (PSAN)	N/A	N/A	N/A	K02701	Photosynthesis ;Photosynthesis proteins	GO:0042651,GO:0015979,GO:0009522,GO:0005516	thylakoid membrane;photosynthesis;photosystem I;calmodulin binding
c40429/f4p14/1135	1134	303.686	Sobic.006G108400.1	general regulatory factor 7	KOG0841	Multifunctional chaperone (14-3-3 family)	O	K06630	DNA repair and recombination proteins ;MAPK signaling pathway - yeast ;Hippo signaling pathway ;Hippo signaling pathway -fly ;PI3K-Akt signaling pathway ;Exosome ;Cell cycle ;Oocyte meiosis ;Neurotrophin signaling pathway ;Viral carcinogenesis ;Epstein-Barr virus infection	GO:0019904	protein domain specific binding
c10067/f2p13/1307	1307	302.35	Sobic.003G132100.1	dicarboxylate diiron protein, putative (Crd1)	N/A	N/A	N/A	K04035	Porphyrin and chlorophyll metabolism	GO:0055114,GO:0046872,GO:0016491	oxidation-reduction process;metal ion binding;oxidoreductase activity
c37666/f1p2/922	922	301.33	Sobic.010G160700.1	phosphoenolpyruvate carboxylase 2	N/A	N/A	N/A	K01595	Pyruvate metabolism ;Carbon fixation in photosynthetic organisms ;Carbon fixation pathways in prokaryotes ;Methane metabolism	GO:0015977,GO:0008964,GO:0006099	carbon fixation;phosphoenolpyruvate carboxylase activity;tricarboxylic acid cycle
c23323/f2p0/592	592	301.244	Sobic.007G004600.1	2Fe-2S ferredoxin-like superfamily protein	N/A	N/A	N/A	K02639	Photosynthesis ;Photosynthesis proteins	GO:0051536,GO:0009055	iron-sulfur cluster binding;electron carrier activity
c1235/f12p5/947	947	299.521	GRMZM2G181258_T01	thioredoxin M-type 4	KOG0910	Thioredoxin-like protein	O	K03671	Chaperones and folding catalysts ;NOD-like receptor signaling pathway ;Fluid shear stress and atherosclerosis	GO:0045454,GO:0015035,GO:0006662	cell redox homeostasis;protein disulfide oxidoreductase activity;glycerol ether metabolic process
c17031/f1p15/1393	1393	297.825	Sobic.010G239500.6	polyubiquitin 10	KOG0005,KOG0001	Ubiquitin-like protein;Ubiquitin-like protein;Ubiquitin and ubiquitin-like proteins;Ubiquitin and ubiquitin-like proteins	O;D;O;R	K08770	Ubiquitin system ;PPAR signaling pathway	N/A	N/A
c46046/f1p3/2180	2180	296.556	Sobic.010G160700.1	phosphoenolpyruvate carboxylase 2	N/A	N/A	N/A	K01595	Pyruvate metabolism ;Carbon fixation in photosynthetic organisms ;Carbon fixation pathways in prokaryotes ;Methane metabolism	GO:0015977,GO:0008964,GO:0006099	carbon fixation;phosphoenolpyruvate carboxylase activity;tricarboxylic acid cycle
c6402/f4p3/1066	1066	295.938	Sobic.009G240900.1	RAN GTPase 3	KOG0096	GTPase Ran/TC4/GSP1 (nuclear protein transport pathway), small G protein superfamily	U	K07936	Transfer RNA biogenesis ;RNA transport ;Messenger RNA Biogenesis ;Ribosome biogenesis in eukaryotes ;Ribosome biogenesis ;Chromosome and associated proteins ;GTP-binding proteins ;Exosome ;HTLV-I infection ;Epstein-Barr virus infection	GO:0005525	GTP binding
c3083/f1p0/641	641	295.706	Sobic.001G149500.1	dehydrin family protein	N/A	N/A	N/A	N/A	N/A	N/A	N/A
c30089/f1p2/1693	1693	295.446	Sobic.008G053200.1	fructose-bisphosphate aldolase 2	N/A	N/A	N/A	K01623	Glycolysis / Gluconeogenesis ;Pentose phosphate pathway ;Fructose and mannose metabolism ;Carbon fixation in photosynthetic organisms ;Methane metabolism ;Membrane trafficking ;Chromosome and associated proteins ;Exosome	GO:0006096,GO:0004332	glycolytic process;fructose-bisphosphate aldolase activity
c31694/f2p14/1648	1647	295.356	Sobic.001G154100.1	DNAJ homologue 2	KOG0712	Molecular chaperone (DnaJ superfamily)	O	K09503	Mitochondrial biogenesis ;Chaperones and folding catalysts ;Protein processing in endoplasmic reticulum	GO:0051082,GO:0031072	unfolded protein binding;heat shock protein binding
c12385/f3p4/905	905	292.627	Sobic.003G437800.1	N/A	N/A	N/A	N/A	N/A	N/A	GO:0006950	response to stress
c20942/f1p0/970	968	291.666	GRMZM2G001724_T02	Peroxisomal membrane 22 kDa (Mpv17/PMP22) family protein	KOG1944	Peroxisomal membrane protein MPV17 and related proteins	R	N/A	N/A	GO:0016021	integral component of membrane
c40022/f6p24/1315	1315	291.414	Sobic.002G288300.1	photosystem II light harvesting complex gene B1B2	N/A	N/A	N/A	K08912	Photosynthesis - antenna proteins ;Photosynthesis proteins	GO:0016020,GO:0009765	membrane;photosynthesis, light harvesting
c40016/f2p13/1760	1760	290.621	Sobic.003G036200.1	NADP-malic enzyme 4	N/A	N/A	N/A	K00029	Pyruvate metabolism ;Carbon fixation in photosynthetic organisms	GO:0055114,GO:0004471,GO:0051287	oxidation-reduction process;malate dehydrogenase (decarboxylating) (NAD+) activity;NAD binding
c34435/f8p9/1091	1091	289.338	Sobic.002G316700.1	ATPase, F1 complex, gamma subunit protein	KOG1531	F0F1-type ATP synthase, gamma subunit	C	K02115	Oxidative phosphorylation ;Photosynthesis ;Photosynthesis proteins	GO:0046961,GO:0046933,GO:0045261,GO:0015986	proton-transporting ATPase activity, rotational mechanism;proton-transporting ATP synthase activity, rotational mechanism;proton-transporting ATP synthase complex, catalytic core F(1);ATP synthesis coupled proton transport
c24766/f1p1/2544	2531	289.158	Sobic.010G160700.1	phosphoenolpyruvate carboxylase 2	N/A	N/A	N/A	K01595	Pyruvate metabolism ;Carbon fixation in photosynthetic organisms ;Carbon fixation pathways in prokaryotes ;Methane metabolism	GO:0015977,GO:0008964,GO:0006099	carbon fixation;phosphoenolpyruvate carboxylase activity;tricarboxylic acid cycle
c37522/f1p4/1014	1014	284.62	Sobic.005G231500.1	rubisco activase	KOG0651	26S proteasome regulatory complex, ATPase RPT4	O	N/A	N/A	GO:0005524	ATP binding
c37771/f1p3/2330	2330	284.345	Sobic.010G160700.1	phosphoenolpyruvate carboxylase 2	N/A	N/A	N/A	K01595	Pyruvate metabolism ;Carbon fixation in photosynthetic organisms ;Carbon fixation pathways in prokaryotes ;Methane metabolism	GO:0015977,GO:0008964,GO:0006099	carbon fixation;phosphoenolpyruvate carboxylase activity;tricarboxylic acid cycle
c39093/f1p1/715	715	283.972	Sobic.007G004700.1	2Fe-2S ferredoxin-like superfamily protein	N/A	N/A	N/A	K02639	Photosynthesis ;Photosynthesis proteins	GO:0051536,GO:0009055	iron-sulfur cluster binding;electron carrier activity
c27699/f1p0/529	529	282.593	Sobic.002G338800.1	Dynein light chain type 1 family protein	KOG3430	Dynein light chain type 1	Z	K10418	Cytoskeleton proteins ;Vasopressin-regulated water reabsorption	GO:0007017,GO:0005875	microtubule-based process;microtubule associated complex
c5387/f1p0/964	964	282.09	Sobic.008G030900.1	lipid transfer protein 1	N/A	N/A	N/A	N/A	N/A	N/A	N/A
c12197/f1p1/1170	1142	281.883	Zm00008a040408_T01	photosystem I light harvesting complex gene 3	N/A	N/A	N/A	K08909	Photosynthesis - antenna proteins ;Photosynthesis proteins	GO:0016020,GO:0009765	membrane;photosynthesis, light harvesting
c34091/f280p95/1366	1366	281.588	Sobic.003G370000.1	Chlorophyll A-B binding family protein	N/A	N/A	N/A	K03542	Photosynthesis ;Photosynthesis proteins	N/A	N/A
c4257/f1p15/1694	1694	280.791	Sobic.010G232100.1	polyubiquitin 10	KOG0001	Ubiquitin and ubiquitin-like proteins;Ubiquitin and ubiquitin-like proteins	O;R	K08770	Ubiquitin system ;PPAR signaling pathway	N/A	N/A
c17278/f1p1/1682	1682	277.444	GRMZM2G419891_T02	polyubiquitin 10	KOG0005,KOG0001	Ubiquitin-like protein;Ubiquitin-like protein;Ubiquitin and ubiquitin-like proteins;Ubiquitin and ubiquitin-like proteins	O;D;O;R	K08770	Ubiquitin system ;PPAR signaling pathway	N/A	N/A
c6717/f2p1/899	899	276.659	Sobic.005G231500.1	rubisco activase	KOG0651	26S proteasome regulatory complex, ATPase RPT4	O	N/A	N/A	GO:0005524	ATP binding
c13667/f25p30/1138	1138	276.07	Sobic.001G177000.1	photosystem II light harvesting complex gene 2.3	N/A	N/A	N/A	K08913	Photosynthesis - antenna proteins ;Photosynthesis proteins	GO:0016020,GO:0009765	membrane;photosynthesis, light harvesting
c4559/f1p2/4543	4528	274.619	Sobic.010G160700.1	phosphoenolpyruvate carboxylase 2	N/A	N/A	N/A	K01595	Pyruvate metabolism ;Carbon fixation in photosynthetic organisms ;Carbon fixation pathways in prokaryotes ;Methane metabolism	GO:0015977,GO:0008964,GO:0006099	carbon fixation;phosphoenolpyruvate carboxylase activity;tricarboxylic acid cycle
c9091/f1p11/1531	1531	273.084	Sobic.001G519800.1	glyceraldehyde-3-phosphate dehydrogenase B subunit	KOG0657	Glyceraldehyde 3-phosphate dehydrogenase	G	K05298	Carbon fixation in photosynthetic organisms	GO:0055114,GO:0016620	oxidation-reduction process;oxidoreductase activity, acting on the aldehyde or oxo group of donors, NAD or NADP as acceptor
c1866/f6p0/891	891	272.881	Sobic.008G030700.1	lipid transfer protein 1	N/A	N/A	N/A	N/A	N/A	N/A	N/A
c5458/f1p5/1070	1070	270.399	Sobic.001G177000.1	photosystem II light harvesting complex gene 2.3	N/A	N/A	N/A	K08913	Photosynthesis - antenna proteins ;Photosynthesis proteins	GO:0016020,GO:0009765	membrane;photosynthesis, light harvesting
c9138/f3p0/826	829	269.848	Sobic.002G363100.2	eukaryotic elongation factor 5A-1	KOG3271	Translation initiation factor 5A (eIF-5A)	J	K03263	Translation factors	GO:0045905,GO:0045901,GO:0043022,GO:0006452,GO:0003746,GO:0003723	positive regulation of translational termination;positive regulation of translational elongation;ribosome binding;translational frameshifting;translation elongation factor activity;RNA binding
c27854/f1p2/1035	1035	268.329	Sobic.009G183700.1	Phosphoglycerate kinase family protein	N/A	N/A	N/A	K00927	Glycolysis / Gluconeogenesis ;Carbon fixation in photosynthetic organisms ;Exosome	GO:0006096,GO:0004618	glycolytic process;phosphoglycerate kinase activity
c38756/f1p0/895	895	266.462	Sobic.010G160700.1	phosphoenolpyruvate carboxylase 2	N/A	N/A	N/A	K01595	Pyruvate metabolism ;Carbon fixation in photosynthetic organisms ;Carbon fixation pathways in prokaryotes ;Methane metabolism	GO:0015977,GO:0008964,GO:0006099	carbon fixation;phosphoenolpyruvate carboxylase activity;tricarboxylic acid cycle
c29586/f1p1/881	881	265.526	Sobic.001G052900.1	thioredoxin 2	KOG0907	Thioredoxin	O	K03671	Chaperones and folding catalysts ;NOD-like receptor signaling pathway ;Fluid shear stress and atherosclerosis	GO:0045454,GO:0015035,GO:0006662	cell redox homeostasis;protein disulfide oxidoreductase activity;glycerol ether metabolic process
c14938/f1p3/887	887	265.191	Sobic.003G064300.2	N/A	N/A	N/A	N/A	N/A	N/A	N/A	N/A
c3412/f1p3/1195	1195	263.457	Sobic.003G234200.6	beta carbonic anhydrase 4	KOG1578	Predicted carbonic anhydrase involved in protection against oxidative damage	P	K01673	Nitrogen metabolism	GO:0008270,GO:0004089	zinc ion binding;carbonate dehydratase activity
c40189/f1p0/923	924	263.443	Pavir.Ba01491.1	N/A	N/A	N/A	N/A	N/A	N/A	N/A	N/A
c39692/f2p4/716	716	263.043	Sobic.003G064300.2	N/A	N/A	N/A	N/A	N/A	N/A	N/A	N/A
c37905/f1p2/943	943	261.572	Sobic.006G264201.1	light harvesting complex photosystem II subunit 6	N/A	N/A	N/A	K08917	Photosynthesis - antenna proteins ;Photosynthesis proteins	GO:0016020,GO:0009765	membrane;photosynthesis, light harvesting
c8645/f1p0/589	587	261.095	Sobic.006G257900.1	ubiquitin-conjugating enzyme 28	KOG0417	Ubiquitin-protein ligase	O	K06689	Protein processing in endoplasmic reticulum ;Ubiquitin mediated proteolysis ;Ubiquitin system ;MAPK signaling pathway - fly ;Toll and Imd signaling pathway	GO:0005515	protein binding
c28731/f1p0/728	728	259.86	Pavir.Db02351.1	N/A	N/A	N/A	N/A	N/A	N/A	N/A	N/A
c15946/f3p11/1771	1771	259.768	Sobic.003G350700.1	heat shock protein 70	N/A	N/A	N/A	K03283	Protein phosphatase and associated proteins ;Spliceosome ;Spliceosome ;Ribosome biogenesis ;Mitochondrial biogenesis ;Chaperones and folding catalysts ;Protein processing in endoplasmic reticulum ;Membrane trafficking ;Proteasome ;MAPK signaling pathway ;Cell adhesion molecules and their ligands ;Endocytosis ;Exosome ;Antigen processing and presentation ;Estrogen signaling pathway ;Longevity regu…	N/A	N/A
c21351/f2p7/979	979	257.815	Sobic.007G052400.3	rubredoxin family protein	N/A	N/A	N/A	N/A	N/A	N/A	N/A
c24108/f1p0/1060	1060	257.443	Sobic.010G160700.1	phosphoenolpyruvate carboxylase 2	N/A	N/A	N/A	K01595	Pyruvate metabolism ;Carbon fixation in photosynthetic organisms ;Carbon fixation pathways in prokaryotes ;Methane metabolism	GO:0015977,GO:0008964,GO:0006099	carbon fixation;phosphoenolpyruvate carboxylase activity;tricarboxylic acid cycle
c47301/f1p0/2171	2171	257.029	Sobic.010G160700.1	phosphoenolpyruvate carboxylase 2	N/A	N/A	N/A	K01595	Pyruvate metabolism ;Carbon fixation in photosynthetic organisms ;Carbon fixation pathways in prokaryotes ;Methane metabolism	GO:0015977,GO:0008964,GO:0006099	carbon fixation;phosphoenolpyruvate carboxylase activity;tricarboxylic acid cycle
c46755/f1p14/2245	2245	255.99	Sobic.003G350700.1	heat shock protein 70	N/A	N/A	N/A	K03283	Protein phosphatase and associated proteins ;Spliceosome ;Spliceosome ;Ribosome biogenesis ;Mitochondrial biogenesis ;Chaperones and folding catalysts ;Protein processing in endoplasmic reticulum ;Membrane trafficking ;Proteasome ;MAPK signaling pathway ;Cell adhesion molecules and their ligands ;Endocytosis ;Exosome ;Antigen processing and presentation ;Estrogen signaling pathway ;Longevity regu…	N/A	N/A
c34227/f2p2/820	821	255.313	Sobic.003G243600.1	ubiquitin conjugating enzyme 9	KOG0417	Ubiquitin-protein ligase	O	K06689	Protein processing in endoplasmic reticulum ;Ubiquitin mediated proteolysis ;Ubiquitin system ;MAPK signaling pathway - fly ;Toll and Imd signaling pathway	N/A	N/A
c10699/f3p0/627	627	254.534	Sobic.002G033900.1	photosystem I subunit K	N/A	N/A	N/A	K02698	Photosynthesis ;Photosynthesis proteins	GO:0016020,GO:0015979,GO:0009522	membrane;photosynthesis;photosystem I
c16161/f2p1/893	894	254.332	Sobic.009G043000.1	thioredoxin F2	KOG0907	Thioredoxin	O	N/A	N/A	GO:0045454,GO:0015035,GO:0006662	cell redox homeostasis;protein disulfide oxidoreductase activity;glycerol ether metabolic process
c39017/f3p4/1298	1300	253.922	Sobic.008G136000.1	heat shock protein 70	N/A	N/A	N/A	K03283	Protein phosphatase and associated proteins ;Spliceosome ;Spliceosome ;Ribosome biogenesis ;Mitochondrial biogenesis ;Chaperones and folding catalysts ;Protein processing in endoplasmic reticulum ;Membrane trafficking ;Proteasome ;MAPK signaling pathway ;Cell adhesion molecules and their ligands ;Endocytosis ;Exosome ;Antigen processing and presentation ;Estrogen signaling pathway ;Longevity regu…	N/A	N/A
c1233/f7p37/1411	1411	250.84	Sobic.006G105900.2	glyceraldehyde 3-phosphate dehydrogenase A subunit 2	KOG0657	Glyceraldehyde 3-phosphate dehydrogenase	G	K05298	Carbon fixation in photosynthetic organisms	GO:0055114,GO:0016620	oxidation-reduction process;oxidoreductase activity, acting on the aldehyde or oxo group of donors, NAD or NADP as acceptor
c38746/f1p2/677	677	250.805	Sobic.008G053200.1	fructose-bisphosphate aldolase 2	N/A	N/A	N/A	K01623	Glycolysis / Gluconeogenesis ;Pentose phosphate pathway ;Fructose and mannose metabolism ;Carbon fixation in photosynthetic organisms ;Methane metabolism ;Membrane trafficking ;Chromosome and associated proteins ;Exosome	GO:0006096,GO:0004332	glycolytic process;fructose-bisphosphate aldolase activity
c44087/f1p51/2166	2166	250.694	Sobic.009G163900.1	heat shock protein 70	N/A	N/A	N/A	K03283	Protein phosphatase and associated proteins ;Spliceosome ;Spliceosome ;Ribosome biogenesis ;Mitochondrial biogenesis ;Chaperones and folding catalysts ;Protein processing in endoplasmic reticulum ;Membrane trafficking ;Proteasome ;MAPK signaling pathway ;Cell adhesion molecules and their ligands ;Endocytosis ;Exosome ;Antigen processing and presentation ;Estrogen signaling pathway ;Longevity regu…	N/A	N/A
c33351/f2p28/893	893	249.48	Sobic.010G241000.1	photosystem II subunit O-2	N/A	N/A	N/A	K02716	Photosynthesis ;Photosynthesis proteins	GO:0042549,GO:0019898,GO:0015979,GO:0009654,GO:0009523,GO:0005509	photosystem II stabilization;extrinsic component of membrane;photosynthesis;photosystem II oxygen evolving complex;photosystem II;calcium ion binding
c29379/f1p12/1097	1098	249.464	Sobic.002G030200.1	photosystem II subunit P-1	N/A	N/A	N/A	K02717	Photosynthesis ;Photosynthesis proteins	GO:0019898,GO:0015979,GO:0009654,GO:0009523,GO:0005509	extrinsic component of membrane;photosynthesis;photosystem II oxygen evolving complex;photosystem II;calcium ion binding
c37502/f2p0/1066	1066	249.217	Sobic.005G042000.1	ribulose bisphosphate carboxylase small chain 1A	N/A	N/A	N/A	K01602	Glyoxylate and dicarboxylate metabolism ;Carbon fixation in photosynthetic organisms	N/A	N/A
c43302/f1p2/1181	1181	248.79	Sobic.009G132900.3	pyruvate orthophosphate dikinase	N/A	N/A	N/A	K01006	Pyruvate metabolism ;Carbon fixation in photosynthetic organisms ;Carbon fixation pathways in prokaryotes	GO:0016772,GO:0016310,GO:0016301,GO:0005524,GO:0050242,GO:0006090	transferase activity, transferring phosphorus-containing groups;phosphorylation;kinase activity;ATP binding;pyruvate, phosphate dikinase activity;pyruvate metabolic process
c35945/f3p8/1354	1354	247.097	Sobic.003G132100.1	dicarboxylate diiron protein, putative (Crd1)	N/A	N/A	N/A	K04035	Porphyrin and chlorophyll metabolism	GO:0055114,GO:0046872,GO:0016491	oxidation-reduction process;metal ion binding;oxidoreductase activity
c47473/f1p0/338	338	246.467	Seita.2G401300.1	RING/U-box superfamily protein	N/A	N/A	N/A	N/A	N/A	GO:0008270,GO:0005515	zinc ion binding;protein binding
c12134/f2p4/961	961	244.873	Sobic.008G053200.1	fructose-bisphosphate aldolase 2	N/A	N/A	N/A	K01623	Glycolysis / Gluconeogenesis ;Pentose phosphate pathway ;Fructose and mannose metabolism ;Carbon fixation in photosynthetic organisms ;Methane metabolism ;Membrane trafficking ;Chromosome and associated proteins ;Exosome	GO:0006096,GO:0004332	glycolytic process;fructose-bisphosphate aldolase activity
c23832/f1p2/2587	2587	244.62	Sobic.010G160700.1	phosphoenolpyruvate carboxylase 2	N/A	N/A	N/A	K01595	Pyruvate metabolism ;Carbon fixation in photosynthetic organisms ;Carbon fixation pathways in prokaryotes ;Methane metabolism	GO:0015977,GO:0008964,GO:0006099	carbon fixation;phosphoenolpyruvate carboxylase activity;tricarboxylic acid cycle
c16262/f1p2/1136	1136	244.611	Sobic.002G339200.2	light-harvesting chlorophyll B-binding protein 3	N/A	N/A	N/A	K08914	Photosynthesis - antenna proteins ;Photosynthesis proteins	GO:0016020,GO:0009765	membrane;photosynthesis, light harvesting
c27748/f1p2/1111	1114	244.007	Sobic.009G178600.1	ADP-ribosylation factor A1F	KOG0070	GTP-binding ADP-ribosylation factor Arf1	U	K07937,K07977	Membrane trafficking ;Phospholipase D signaling pathway ;GTP-binding proteins ;Endocytosis ;Exosome ;Vibrio cholerae infection ;Legionellosis ;GTP-binding proteins	N/A	N/A
c14143/f2p0/825	825	241.972	Sobic.002G363100.2	eukaryotic elongation factor 5A-1	KOG3271	Translation initiation factor 5A (eIF-5A)	J	K03263	Translation factors	GO:0045905,GO:0045901,GO:0043022,GO:0006452,GO:0003746,GO:0003723	positive regulation of translational termination;positive regulation of translational elongation;ribosome binding;translational frameshifting;translation elongation factor activity;RNA binding
c36297/f1p0/959	959	241.294	Sobic.010G160700.1	phosphoenolpyruvate carboxylase 2	N/A	N/A	N/A	K01595	Pyruvate metabolism ;Carbon fixation in photosynthetic organisms ;Carbon fixation pathways in prokaryotes ;Methane metabolism	GO:0015977,GO:0008964,GO:0006099	carbon fixation;phosphoenolpyruvate carboxylase activity;tricarboxylic acid cycle
c9304/f1p9/1045	1045	241.289	Sobic.010G262500.1	glyceraldehyde-3-phosphate dehydrogenase C subunit 1	KOG0657	Glyceraldehyde 3-phosphate dehydrogenase	G	K00134	Glycolysis / Gluconeogenesis ;Carbon fixation in photosynthetic organisms ;Membrane trafficking ;HIF-1 signaling pathway ;Exosome ;Alzheimer's disease	GO:0055114,GO:0016620	oxidation-reduction process;oxidoreductase activity, acting on the aldehyde or oxo group of donors, NAD or NADP as acceptor
c7005/f3p47/1295	1294	240.999	Sobic.004G142800.1	Papain family cysteine protease	KOG1542	Cysteine proteinase Cathepsin F	O	K01373	Peptidases ;Lysosome ;Apoptosis	GO:0008234,GO:0006508	cysteine-type peptidase activity;proteolysis
c34319/f123p71/1492	1492	240.096	Sobic.008G094000.1	homolog of Medicago truncatula MTN3	KOG1623	Multitransmembrane protein	R	K15382	Transporters	N/A	N/A
c8564/f1p5/1404	1404	239.527	Sobic.002G112400.4	PGR5-LIKE A	N/A	N/A	N/A	N/A	N/A	N/A	N/A
c4325/f1p0/756	756	239.436	Sobic.010G041600.1	profilin 3	KOG1755	Profilin	Z	K05759	Membrane trafficking ;Rap1 signaling pathway ;MAPK signaling pathway - fly ;Exosome ;Regulation of actin cytoskeleton ;Cytoskeleton proteins ;Salmonella infection ;Shigellosis	N/A	N/A
c4796/f3p11/1240	1241	238.997	Sobic.007G047300.1	O-methyltransferase 1	KOG3178	Hydroxyindole-O-methyltransferase and related SAM-dependent methyltransferases	R	K05279	Flavone and flavonol biosynthesis	GO:0046983,GO:0008171	protein dimerization activity;O-methyltransferase activity
c35614/f1p1/1342	1342	238.88	Sobic.010G160700.1	phosphoenolpyruvate carboxylase 2	N/A	N/A	N/A	K01595	Pyruvate metabolism ;Carbon fixation in photosynthetic organisms ;Carbon fixation pathways in prokaryotes ;Methane metabolism	GO:0015977,GO:0008964,GO:0006099	carbon fixation;phosphoenolpyruvate carboxylase activity;tricarboxylic acid cycle
c40229/f1p5/1335	1333	237.818	Sobic.009G183700.1	Phosphoglycerate kinase family protein	N/A	N/A	N/A	K00927	Glycolysis / Gluconeogenesis ;Carbon fixation in photosynthetic organisms ;Exosome	GO:0006096,GO:0004618	glycolytic process;phosphoglycerate kinase activity
c15747/f1p0/879	881	237.4	Sobic.008G185900.1	cold, circadian rhythm, and rna binding 2	N/A	N/A	N/A	N/A	N/A	GO:0003676	nucleic acid binding
c151/f34p23/1476	1476	237.127	Sobic.010G232100.1	polyubiquitin 10	KOG0001	Ubiquitin and ubiquitin-like proteins;Ubiquitin and ubiquitin-like proteins	O;R	K08770	Ubiquitin system ;PPAR signaling pathway	N/A	N/A
c36682/f1p3/1158	1158	236.556	Zm00008a040408_T01	photosystem I light harvesting complex gene 3	N/A	N/A	N/A	K08909	Photosynthesis - antenna proteins ;Photosynthesis proteins	GO:0016020,GO:0009765	membrane;photosynthesis, light harvesting
c33731/f13p19/1190	1191	236.113	Sobic.002G338000.1	light harvesting complex photosystem II	N/A	N/A	N/A	K08915	Photosynthesis - antenna proteins ;Photosynthesis proteins	GO:0016020,GO:0009765	membrane;photosynthesis, light harvesting
c13444/f1p18/1063	1064	235.666	Sobic.002G030200.1	photosystem II subunit P-1	N/A	N/A	N/A	K02717	Photosynthesis ;Photosynthesis proteins	GO:0019898,GO:0015979,GO:0009654,GO:0009523,GO:0005509	extrinsic component of membrane;photosynthesis;photosystem II oxygen evolving complex;photosystem II;calcium ion binding
c36115/f1p0/897	897	235.379	GRMZM2G051879_T03	Histone superfamily protein	KOG1745	Histones H3 and H4	B	K11253	Chromosome and associated proteins ;Exosome ;Transcriptional misregulation in cancers ;Systemic lupus erythematosus ;Alcoholism	GO:0003677,GO:0000786	DNA binding;nucleosome
c33344/f10p20/1222	1222	234.014	Sobic.007G069200.1	glyoxalase I homolog	KOG2943	Predicted glyoxalase	G	K01759	Pyruvate metabolism	N/A	N/A
c1144/f12p11/1142	1153	233.877	Sobic.004G235200.1	ATP synthase delta-subunit gene	KOG1662	Mitochondrial F1F0-ATP synthase, subunit OSCP/ATP5	C	K02113	Oxidative phosphorylation ;Photosynthesis ;Photosynthesis proteins	GO:0046933,GO:0015986	proton-transporting ATP synthase activity, rotational mechanism;ATP synthesis coupled proton transport
c18488/f1p55/2532	2533	232.406	Sobic.003G350700.1	heat shock protein 70	N/A	N/A	N/A	K03283	Protein phosphatase and associated proteins ;Spliceosome ;Spliceosome ;Ribosome biogenesis ;Mitochondrial biogenesis ;Chaperones and folding catalysts ;Protein processing in endoplasmic reticulum ;Membrane trafficking ;Proteasome ;MAPK signaling pathway ;Cell adhesion molecules and their ligands ;Endocytosis ;Exosome ;Antigen processing and presentation ;Estrogen signaling pathway ;Longevity regu…	N/A	N/A
c8029/f5p38/1192	1192	231.496	Sobic.002G278800.1	Ribonuclease T2 family protein	KOG1642	Ribonuclease, T2 family	A	K01166	Transfer RNA biogenesis	GO:0033897,GO:0003723	ribonuclease T2 activity;RNA binding
c10334/f1p0/576	576	230.599	Sobic.002G033900.1	photosystem I subunit K	N/A	N/A	N/A	K02698	Photosynthesis ;Photosynthesis proteins	GO:0016020,GO:0015979,GO:0009522	membrane;photosynthesis;photosystem I
c39197/f1p0/547	547	229.522	Sobic.003G064300.2	N/A	N/A	N/A	N/A	N/A	N/A	N/A	N/A
c40426/f3p27/1103	1103	229.145	Sobic.006G176700.1	plasma membrane intrinsic protein 1;4	KOG0223	Aquaporin (major intrinsic protein family)	G	K09872	Transporters	GO:0016020,GO:0006810,GO:0005215	membrane;transport;transporter activity
c34760/f1p0/587	587	228.418	Sobic.003G437600.2	thioredoxin Y1	KOG0910	Thioredoxin-like protein	O	N/A	N/A	GO:0045454,GO:0015035,GO:0006662	cell redox homeostasis;protein disulfide oxidoreductase activity;glycerol ether metabolic process
c9670/f1p1/721	721	228.375	Sobic.003G408000.2	ribosomal protein large subunit 27	KOG4600	Mitochondrial ribosomal protein MRP7 (L2)	J	K02899	Ribosome ;Ribosome	GO:0006412,GO:0005840,GO:0005622,GO:0003735	translation;ribosome;intracellular;structural constituent of ribosome
c34855/f8p8/1159	1159	228.334	Sobic.007G069200.2	glyoxalase I homolog	KOG2943	Predicted glyoxalase	G	K01759	Pyruvate metabolism	N/A	N/A
c11737/f1p6/1745	1745	228.068	Sobic.001G517700.1	catalase 2	N/A	N/A	N/A	K03781	Glyoxylate and dicarboxylate metabolism ;Tryptophan metabolism ;MAPK signaling pathway - plant ;MAPK signaling pathway - yeast ;FoxO signaling pathway ;Peroxisome ;Longevity regulating pathway - mammal ;Longevity regulating pathway - worm ;Longevity regulating pathway - multiple species ;Amyotrophic lateral sclerosis (ALS)	GO:0055114,GO:0020037,GO:0004096,GO:0006979	oxidation-reduction process;heme binding;catalase activity;response to oxidative stress
c21244/f1p12/1106	1110	227.792	Sobic.006G264201.1	light harvesting complex photosystem II subunit 6	N/A	N/A	N/A	K08917	Photosynthesis - antenna proteins ;Photosynthesis proteins	GO:0016020,GO:0009765	membrane;photosynthesis, light harvesting
c4120/f1p1/1156	1156	227.183	Sobic.007G073400.3	Leucine-rich repeat transmembrane protein kinase	KOG1187	Serine/threonine protein kinase	T	N/A	N/A	GO:0006468,GO:0004672	protein phosphorylation;protein kinase activity
c34544/f2p0/648	649	227.136	Sobic.001G078000.1	cytochrome b6f complex subunit (petM), putative	N/A	N/A	N/A	N/A	N/A	GO:0009512	cytochrome b6f complex
c13610/f26p23/1704	1704	227.041	Sobic.009G033600.1	S-adenosylmethionine synthetase 1	N/A	N/A	N/A	K00789	Cysteine and methionine metabolism	GO:0006556,GO:0004478,GO:0005524	S-adenosylmethionine biosynthetic process;methionine adenosyltransferase activity;ATP binding
c369/f67p58/1203	1203	226.289	Sobic.007G136900.1	light-harvesting chlorophyll-protein complex I subunit A4	N/A	N/A	N/A	K08910	Photosynthesis - antenna proteins ;Photosynthesis proteins	GO:0016020,GO:0009765	membrane;photosynthesis, light harvesting
c461/f22p19/1493	1493	226.238	Sobic.010G239500.6	polyubiquitin 10	KOG0005,KOG0001	Ubiquitin-like protein;Ubiquitin-like protein;Ubiquitin and ubiquitin-like proteins;Ubiquitin and ubiquitin-like proteins	O;D;O;R	K08770	Ubiquitin system ;PPAR signaling pathway	N/A	N/A
c769/f23p20/1772	1772	225.63	Sobic.002G006600.1	glutamate:glyoxylate aminotransferase	N/A	N/A	N/A	K14272	Glyoxylate and dicarboxylate metabolism ;Carbon fixation in photosynthetic organisms ;Alanine;Glycine;Arginine biosynthesis ;Amino acid related enzymes	GO:0030170,GO:0009058	pyridoxal phosphate binding;biosynthetic process
c35414/f1p0/753	753	224.154	Sobic.003G014400.1	N/A	N/A	N/A	N/A	N/A	N/A	N/A	N/A
c11642/f2p0/654	654	222.887	LOC_Os01g10400.2	metallothionein 3	N/A	N/A	N/A	N/A	N/A	N/A	N/A
c8570/f2p0/1048	1052	221.92	Sobic.004G056900.1	photosystem I light harvesting complex gene 1	N/A	N/A	N/A	K08907	Photosynthesis - antenna proteins ;Photosynthesis proteins	GO:0016020,GO:0009765	membrane;photosynthesis, light harvesting
c8372/f1p13/1171	1171	221.522	Sobic.003G370000.1	Chlorophyll A-B binding family protein	N/A	N/A	N/A	K03542	Photosynthesis ;Photosynthesis proteins	N/A	N/A
c13611/f12p13/1150	1151	221.434	Sobic.002G431100.1	ascorbate peroxidase 1	N/A	N/A	N/A	K00434	Ascorbate and aldarate metabolism ;Glutathione metabolism	GO:0055114,GO:0020037,GO:0006979,GO:0004601	oxidation-reduction process;heme binding;response to oxidative stress;peroxidase activity
c40353/f5p6/1353	1353	220.873	Sobic.007G216300.1	HEAT SHOCK PROTEIN 81.4	N/A	N/A	N/A	K04079	Protein phosphatase and associated proteins ;Mitochondrial biogenesis ;Chaperones and folding catalysts ;Protein processing in endoplasmic reticulum ;Membrane trafficking ;Proteasome ;PI3K-Akt signaling pathway ;Exosome ;Necroptosis ;NOD-like receptor signaling pathway ;Antigen processing and presentation ;Th17 cell differentiation ;IL-17 signaling pathway ;Estrogen signaling pathway ;Progesteron…	GO:0051082,GO:0006950,GO:0006457,GO:0005524	unfolded protein binding;response to stress;protein folding;ATP binding
c24999/f1p22/1202	1202	220.758	Sobic.009G085100.2	phytochrome-associated protein 2	N/A	N/A	N/A	K14484	Plant hormone signal transduction	GO:0006355,GO:0005634	regulation of transcription, DNA-templated;nucleus
c31264/f1p0/762	762	220.333	Sobic.010G160700.1	phosphoenolpyruvate carboxylase 2	N/A	N/A	N/A	K01595	Pyruvate metabolism ;Carbon fixation in photosynthetic organisms ;Carbon fixation pathways in prokaryotes ;Methane metabolism	GO:0015977,GO:0008964,GO:0006099	carbon fixation;phosphoenolpyruvate carboxylase activity;tricarboxylic acid cycle
c40487/f2p3/1104	1105	219.506	Sobic.008G053200.1	fructose-bisphosphate aldolase 2	N/A	N/A	N/A	K01623	Glycolysis / Gluconeogenesis ;Pentose phosphate pathway ;Fructose and mannose metabolism ;Carbon fixation in photosynthetic organisms ;Methane metabolism ;Membrane trafficking ;Chromosome and associated proteins ;Exosome	GO:0006096,GO:0004332	glycolytic process;fructose-bisphosphate aldolase activity
c6450/f2p8/1207	1208	218.425	Sobic.002G047400.1	protein containing PDZ domain, a K-box domain, and a TPR region	N/A	N/A	N/A	N/A	N/A	N/A	N/A
c16822/f1p0/733	733	218.367	Sobic.009G229700.1	photosystem I subunit H2	N/A	N/A	N/A	K02695	Photosynthesis ;Photosynthesis proteins	GO:0015979,GO:0009538,GO:0009522	photosynthesis;photosystem I reaction center;photosystem I
c13662/f24p18/1526	1528	218.327	Sobic.002G047400.1	protein containing PDZ domain, a K-box domain, and a TPR region	N/A	N/A	N/A	N/A	N/A	N/A	N/A
c2789/f4p0/770	770	218.196	GRMZM2G335635_T01	N/A	N/A	N/A	N/A	N/A	N/A	N/A	N/A
c402/f14p23/1081	1082	218.189	Sobic.005G042000.1	ribulose bisphosphate carboxylase small chain 1A	N/A	N/A	N/A	K01602	Glyoxylate and dicarboxylate metabolism ;Carbon fixation in photosynthetic organisms	N/A	N/A
c19671/f2p1/813	813	216.779	Sobic.004G321000.1	HSP20-like chaperones superfamily protein	N/A	N/A	N/A	K13993	Chaperones and folding catalysts ;Protein processing in endoplasmic reticulum	N/A	N/A
c13546/f14p44/1674	1674	216.3	Sobic.003G234200.6	beta carbonic anhydrase 4	KOG1578	Predicted carbonic anhydrase involved in protection against oxidative damage	P	K01673	Nitrogen metabolism	GO:0008270,GO:0004089	zinc ion binding;carbonate dehydratase activity
c40784/f1p1/492	492	216.171	Sobic.006G131800.1	B-box zinc finger family protein	N/A	N/A	N/A	N/A	N/A	GO:0008270,GO:0005622	zinc ion binding;intracellular
c38880/f1p1/901	903	215.148	Sobic.007G223500.2	N/A	N/A	N/A	N/A	N/A	N/A	N/A	N/A
c13735/f47p9/1142	1141	214.768	Sobic.002G431100.1	ascorbate peroxidase 1	N/A	N/A	N/A	K00434	Ascorbate and aldarate metabolism ;Glutathione metabolism	GO:0055114,GO:0020037,GO:0006979,GO:0004601	oxidation-reduction process;heme binding;response to oxidative stress;peroxidase activity
c17099/f1p3/6671	6585	213.967	Sobic.010G160700.1	phosphoenolpyruvate carboxylase 2	N/A	N/A	N/A	K01595	Pyruvate metabolism ;Carbon fixation in photosynthetic organisms ;Carbon fixation pathways in prokaryotes ;Methane metabolism	GO:0015977,GO:0008964,GO:0006099	carbon fixation;phosphoenolpyruvate carboxylase activity;tricarboxylic acid cycle
c15734/f2p4/937	937	212.28	Sobic.003G052500.1	photosystem I subunit l	N/A	N/A	N/A	K02699	Photosynthesis ;Photosynthesis proteins	GO:0015979,GO:0009538,GO:0009522	photosynthesis;photosystem I reaction center;photosystem I
c13983/f1p0/794	793	212.062	Sobic.006G257900.1	ubiquitin-conjugating enzyme 28	KOG0417	Ubiquitin-protein ligase	O	K06689	Protein processing in endoplasmic reticulum ;Ubiquitin mediated proteolysis ;Ubiquitin system ;MAPK signaling pathway - fly ;Toll and Imd signaling pathway	GO:0005515	protein binding
c29863/f1p8/1053	1055	210.734	Sobic.001G177000.1	photosystem II light harvesting complex gene 2.3	N/A	N/A	N/A	K08913	Photosynthesis - antenna proteins ;Photosynthesis proteins	GO:0016020,GO:0009765	membrane;photosynthesis, light harvesting
c13745/f12p2/1065	1066	210.021	Sobic.003G409700.2	Rieske (2Fe-2S) domain-containing protein	N/A	N/A	N/A	N/A	N/A	N/A	N/A
c17547/f1p1/1259	1274	209.85	Sobic.001G519800.1	glyceraldehyde-3-phosphate dehydrogenase B subunit	KOG0657	Glyceraldehyde 3-phosphate dehydrogenase	G	K05298	Carbon fixation in photosynthetic organisms	GO:0055114,GO:0016620	oxidation-reduction process;oxidoreductase activity, acting on the aldehyde or oxo group of donors, NAD or NADP as acceptor
c47222/f1p4/2478	2481	209.834	Sobic.010G160700.1	phosphoenolpyruvate carboxylase 2	N/A	N/A	N/A	K01595	Pyruvate metabolism ;Carbon fixation in photosynthetic organisms ;Carbon fixation pathways in prokaryotes ;Methane metabolism	GO:0015977,GO:0008964,GO:0006099	carbon fixation;phosphoenolpyruvate carboxylase activity;tricarboxylic acid cycle
c29392/f1p5/998	1000	209.589	Sobic.007G034300.1	N/A	N/A	N/A	N/A	N/A	N/A	N/A	N/A
c21565/f1p0/662	662	209.112	Sobic.007G002000.1	Heavy metal transport/detoxification superfamily protein	KOG1603	Copper chaperone	P	N/A	N/A	GO:0046872,GO:0030001	metal ion binding;metal ion transport
c5073/f3p33/1401	1401	208.749	Sobic.006G105900.5	glyceraldehyde 3-phosphate dehydrogenase A subunit 2	KOG0657	Glyceraldehyde 3-phosphate dehydrogenase	G	N/A	N/A	GO:0055114,GO:0016620	oxidation-reduction process;oxidoreductase activity, acting on the aldehyde or oxo group of donors, NAD or NADP as acceptor
c27344/f2p11/1326	1326	207.903	Zm00008a040408_T01	photosystem I light harvesting complex gene 3	N/A	N/A	N/A	K08909	Photosynthesis - antenna proteins ;Photosynthesis proteins	GO:0016020,GO:0009765	membrane;photosynthesis, light harvesting
c44819/f1p1/1157	1158	207.063	Sobic.002G278800.1	Ribonuclease T2 family protein	KOG1642	Ribonuclease, T2 family	A	K01166	Transfer RNA biogenesis	GO:0033897,GO:0003723	ribonuclease T2 activity;RNA binding
c439/f20p10/1031	1031	206.729	GRMZM5G855672_T02	dehydroascorbate reductase 2	KOG1422	Intracellular Cl- channel CLIC, contains GST domain	P	N/A	N/A	GO:0005515	protein binding
c18021/f2p18/1409	1411	206.308	Sobic.008G053200.1	fructose-bisphosphate aldolase 2	N/A	N/A	N/A	K01623	Glycolysis / Gluconeogenesis ;Pentose phosphate pathway ;Fructose and mannose metabolism ;Carbon fixation in photosynthetic organisms ;Methane metabolism ;Membrane trafficking ;Chromosome and associated proteins ;Exosome	GO:0006096,GO:0004332	glycolytic process;fructose-bisphosphate aldolase activity
c6675/f1p4/999	1000	206.013	Sobic.002G006600.2	alanine-2-oxoglutarate aminotransferase 2	N/A	N/A	N/A	N/A	N/A	GO:0030170,GO:0009058	pyridoxal phosphate binding;biosynthetic process
c27796/f1p21/1186	1186	205.907	Sobic.002G338000.1	light harvesting complex photosystem II	N/A	N/A	N/A	K08915	Photosynthesis - antenna proteins ;Photosynthesis proteins	GO:0016020,GO:0009765	membrane;photosynthesis, light harvesting
c6289/f2p3/805	805	205.761	Sobic.010G232100.3	polyubiquitin 10	KOG0005,KOG0001	Ubiquitin-like protein;Ubiquitin-like protein;Ubiquitin and ubiquitin-like proteins;Ubiquitin and ubiquitin-like proteins	O;D;O;R	K08770,K04551	Ubiquitin system ;PPAR signaling pathway ;Ubiquitin system ;Endocytosis ;Exosome ;Mitophagy - animal ;Parkinson's disease ;Kaposi's sarcoma-associated herpesvirus infection	N/A	N/A
c34788/f1p0/943	943	205.674	Sobic.003G419900.1	photosystem II reaction center PSB28 protein	N/A	N/A	N/A	K08903	Photosynthesis ;Photosynthesis proteins	GO:0016020,GO:0015979,GO:0009654,GO:0009523	membrane;photosynthesis;photosystem II oxygen evolving complex;photosystem II
c9381/f4p1/1082	1082	205.125	Sobic.001G035600.1	Chalcone-flavanone isomerase family protein	N/A	N/A	N/A	K01859	Flavonoid biosynthesis	GO:0016872	intramolecular lyase activity
c942/f23p11/1341	1342	203.825	Sobic.008G064700.1	galactose-1-phosphate guanylyltransferase (GDP)s;GDP-D-glucose phosphorylases;quercetin 4\'-O-glucosyltransferases	KOG2720	Predicted hydrolase (HIT family)	R	K14190	Ascorbate and aldarate metabolism	GO:0080048	GDP-D-glucose phosphorylase activity
c16542/f1p0/582	582	203.766	Seita.5G093000.1	HSP20-like chaperones superfamily protein	KOG0710	Molecular chaperone (small heat-shock protein Hsp26/Hsp42)	O	K13993	Chaperones and folding catalysts ;Protein processing in endoplasmic reticulum	N/A	N/A
c24550/f3p2/836	836	203.603	Sobic.003G064300.2	N/A	N/A	N/A	N/A	N/A	N/A	N/A	N/A
c9840/f1p1/890	894	203.594	Sobic.008G185900.1	cold, circadian rhythm, and rna binding 2	N/A	N/A	N/A	N/A	N/A	GO:0003676	nucleic acid binding
c28555/f9p60/1310	1310	203.588	Sobic.010G262500.1	glyceraldehyde-3-phosphate dehydrogenase C subunit 1	KOG0657	Glyceraldehyde 3-phosphate dehydrogenase	G	K00134	Glycolysis / Gluconeogenesis ;Carbon fixation in photosynthetic organisms ;Membrane trafficking ;HIF-1 signaling pathway ;Exosome ;Alzheimer's disease	GO:0055114,GO:0016620	oxidation-reduction process;oxidoreductase activity, acting on the aldehyde or oxo group of donors, NAD or NADP as acceptor
c23036/f1p0/639	642	202.946	GRMZM2G137329_T01	Bifunctional inhibitor/lipid-transfer protein/seed storage 2S albumin superfamily protein	N/A	N/A	N/A	N/A	N/A	N/A	N/A
c17862/f1p0/788	791	202.879	Sobic.001G526600.1	sumo conjugation enzyme 1	KOG0424	Ubiquitin-protein ligase	O	K10577	RNA transport ;Messenger RNA Biogenesis ;Ubiquitin mediated proteolysis ;Ubiquitin system ;NF-kappa B signaling pathway ;MicroRNAs in cancer	N/A	N/A
c9348/f3p0/624	624	202.776	Sobic.003G397500.1	N/A	N/A	N/A	N/A	N/A	N/A	N/A	N/A
c21866/f1p3/1473	1475	202.421	Sobic.003G350700.1	heat shock protein 70	N/A	N/A	N/A	K03283	Protein phosphatase and associated proteins ;Spliceosome ;Spliceosome ;Ribosome biogenesis ;Mitochondrial biogenesis ;Chaperones and folding catalysts ;Protein processing in endoplasmic reticulum ;Membrane trafficking ;Proteasome ;MAPK signaling pathway ;Cell adhesion molecules and their ligands ;Endocytosis ;Exosome ;Antigen processing and presentation ;Estrogen signaling pathway ;Longevity regu…	N/A	N/A
c39771/f15p9/1453	1453	200.879	Sobic.001G064500.1	DNAJ homologue 2	KOG0712	Molecular chaperone (DnaJ superfamily)	O	K09503	Mitochondrial biogenesis ;Chaperones and folding catalysts ;Protein processing in endoplasmic reticulum	GO:0051082,GO:0031072	unfolded protein binding;heat shock protein binding
c183/f14p15/1072	1072	200.451	Sobic.002G030200.1	photosystem II subunit P-1	N/A	N/A	N/A	K02717	Photosynthesis ;Photosynthesis proteins	GO:0019898,GO:0015979,GO:0009654,GO:0009523,GO:0005509	extrinsic component of membrane;photosynthesis;photosystem II oxygen evolving complex;photosystem II;calcium ion binding
c31572/f1p1/818	818	200.115	Sobic.004G309500.1	Protein of unknown function (DUF1685)	N/A	N/A	N/A	N/A	N/A	N/A	N/A
c8588/f2p6/1034	1034	200.003	Sobic.002G047400.1	protein containing PDZ domain, a K-box domain, and a TPR region	N/A	N/A	N/A	N/A	N/A	N/A	N/A
c1141/f4p47/1509	1510	199.562	Sobic.010G232100.1	polyubiquitin 10	KOG0001	Ubiquitin and ubiquitin-like proteins;Ubiquitin and ubiquitin-like proteins	O;R	K08770	Ubiquitin system ;PPAR signaling pathway	N/A	N/A
c37955/f1p1/1047	1047	199.143	Sobic.002G421300.2	hydroxyproline-rich glycoprotein family protein	N/A	N/A	N/A	N/A	N/A	N/A	N/A
c16981/f2p5/1184	1184	198.857	Sobic.001G386200.1	atypical CYS HIS rich thioredoxin 4	KOG0907	Thioredoxin	O	N/A	N/A	GO:0045454,GO:0015035,GO:0006662	cell redox homeostasis;protein disulfide oxidoreductase activity;glycerol ether metabolic process
c5438/f2p0/962	964	198.813	Sobic.003G199800.4	Protein of unknown function (DUF1118)	N/A	N/A	N/A	N/A	N/A	N/A	N/A
c19441/f1p1/882	882	198.194	Sobic.003G234200.6	beta carbonic anhydrase 4	KOG1578	Predicted carbonic anhydrase involved in protection against oxidative damage	P	K01673	Nitrogen metabolism	GO:0008270,GO:0004089	zinc ion binding;carbonate dehydratase activity
c39335/f1p30/2342	2342	198.087	Sobic.009G163900.1	heat shock protein 70	N/A	N/A	N/A	K03283	Protein phosphatase and associated proteins ;Spliceosome ;Spliceosome ;Ribosome biogenesis ;Mitochondrial biogenesis ;Chaperones and folding catalysts ;Protein processing in endoplasmic reticulum ;Membrane trafficking ;Proteasome ;MAPK signaling pathway ;Cell adhesion molecules and their ligands ;Endocytosis ;Exosome ;Antigen processing and presentation ;Estrogen signaling pathway ;Longevity regu…	N/A	N/A
c20082/f1p2/983	983	198.052	Sobic.009G070700.1	HAD superfamily, subfamily IIIB acid phosphatase	N/A	N/A	N/A	N/A	N/A	GO:0003993	acid phosphatase activity
c27275/f1p11/1110	1110	197.575	Sobic.004G235200.1	ATP synthase delta-subunit gene	KOG1662	Mitochondrial F1F0-ATP synthase, subunit OSCP/ATP5	C	K02113	Oxidative phosphorylation ;Photosynthesis ;Photosynthesis proteins	GO:0046933,GO:0015986	proton-transporting ATP synthase activity, rotational mechanism;ATP synthesis coupled proton transport
c22365/f1p24/988	988	196.998	Zm00008a040408_T01	photosystem I light harvesting complex gene 3	N/A	N/A	N/A	K08909	Photosynthesis - antenna proteins ;Photosynthesis proteins	GO:0016020,GO:0009765	membrane;photosynthesis, light harvesting
c2324/f2p0/847	849	196.921	GRMZM2G047513_T01	Ribosomal protein S10p/S20e family protein	KOG0900	40S ribosomal protein S20	J	K02946	Ribosome ;Ribosome	GO:0006412,GO:0005840,GO:0003735	translation;ribosome;structural constituent of ribosome
c11731/f1p0/910	911	196.447	Sobic.005G055000.1	ATPase, F0/V0 complex, subunit C protein	KOG0232	Vacuolar H+-ATPase V0 sector, subunits c/c'	C	K02155	Oxidative phosphorylation ;Phagosome ;Lysosome ;Collecting duct acid secretion ;Synaptic vesicle cycle ;Rheumatoid arthritis ;Vibrio cholerae infection ;Epithelial cell signaling in Helicobacter pylori infection ;Tuberculosis	GO:0033177,GO:0015991,GO:0015078	proton-transporting two-sector ATPase complex, proton-transporting domain;ATP hydrolysis coupled proton transport;hydrogen ion transmembrane transporter activity
c499/f37p13/1213	1214	194.784	Sobic.004G050100.4	polyubiquitin 10	KOG0005,KOG0001	Ubiquitin-like protein;Ubiquitin-like protein;Ubiquitin and ubiquitin-like proteins;Ubiquitin and ubiquitin-like proteins	O;D;O;R	K08770,K04551	Ubiquitin system ;PPAR signaling pathway ;Ubiquitin system ;Endocytosis ;Exosome ;Mitophagy - animal ;Parkinson's disease ;Kaposi's sarcoma-associated herpesvirus infection	N/A	N/A
c972/f17p8/1204	1204	194.422	Sobic.006G209500.1	Transcription initiation factor TFIIE, beta subunit	KOG3095	Transcription initiation factor IIE, beta subunit	K	K03137	Basal transcription factors ;Transcription machinery ;Viral carcinogenesis ;Epstein-Barr virus infection	GO:0006367	transcription initiation from RNA polymerase II promoter
c15679/f1p2/1245	1243	194.114	Sobic.002G112400.4	PGR5-LIKE A	N/A	N/A	N/A	N/A	N/A	N/A	N/A
c2251/f6p13/1295	1295	193.256	Sobic.009G223300.1	Transducin/WD40 repeat-like superfamily protein	KOG0279	G protein beta subunit-like protein	T	K14753	Messenger RNA Biogenesis ;Exosome ;Measles	GO:0005515	protein binding
c34749/f1p3/994	996	193.213	Sobic.009G129800.1	alpha/beta-Hydrolases superfamily protein	KOG3043	Predicted hydrolase related to dienelactone hydrolase	R	N/A	N/A	N/A	N/A
c789/f21p15/925	925	193.053	Sobic.005G042000.1	ribulose bisphosphate carboxylase small chain 1A	N/A	N/A	N/A	K01602	Glyoxylate and dicarboxylate metabolism ;Carbon fixation in photosynthetic organisms	N/A	N/A
c27692/f1p0/793	793	192.825	Zm00008a007432_T01	photosystem I subunit O	N/A	N/A	N/A	K14332	Photosynthesis ;Photosynthesis proteins	N/A	N/A
c14892/f1p5/1235	1235	192.553	Sobic.006G147300.1	N/A	N/A	N/A	N/A	N/A	N/A	GO:0016020	membrane
c357/f7p32/1933	1933	192.508	Sobic.001G472800.1	myo-inositol-1-phosphate synthase 2	N/A	N/A	N/A	K01858	Inositol phosphate metabolism ;Streptomycin biosynthesis	GO:0008654,GO:0006021,GO:0004512	phospholipid biosynthetic process;inositol biosynthetic process;inositol-3-phosphate synthase activity
c33499/f3p11/1267	1267	192.318	Sobic.008G053200.1	fructose-bisphosphate aldolase 2	N/A	N/A	N/A	K01623	Glycolysis / Gluconeogenesis ;Pentose phosphate pathway ;Fructose and mannose metabolism ;Carbon fixation in photosynthetic organisms ;Methane metabolism ;Membrane trafficking ;Chromosome and associated proteins ;Exosome	GO:0006096,GO:0004332	glycolytic process;fructose-bisphosphate aldolase activity
c5347/f4p25/1323	1323	192.308	Sobic.007G029400.1	Ribosomal protein L10 family protein	KOG0815	60S acidic ribosomal protein P0	J	K02941	Ribosome ;Ribosome	GO:0042254,GO:0005622	ribosome biogenesis;intracellular
c3603/f1p21/2174	2182	191.941	Sobic.009G163900.1	heat shock protein 70	N/A	N/A	N/A	K03283	Protein phosphatase and associated proteins ;Spliceosome ;Spliceosome ;Ribosome biogenesis ;Mitochondrial biogenesis ;Chaperones and folding catalysts ;Protein processing in endoplasmic reticulum ;Membrane trafficking ;Proteasome ;MAPK signaling pathway ;Cell adhesion molecules and their ligands ;Endocytosis ;Exosome ;Antigen processing and presentation ;Estrogen signaling pathway ;Longevity regu…	N/A	N/A
c30346/f1p17/1300	1300	191.391	Sobic.002G352100.1	photosystem I light harvesting complex gene 2	N/A	N/A	N/A	K08908	Photosynthesis - antenna proteins ;Photosynthesis proteins	GO:0016020,GO:0009765	membrane;photosynthesis, light harvesting
c11384/f1p0/612	612	191.194	Sobic.007G068900.1	Ubiquitin-like superfamily protein	KOG1654	Microtubule-associated anchor protein involved in autophagy and membrane trafficking	Z	K08341	Mitochondrial biogenesis ;Membrane trafficking ;Ubiquitin system ;Apelin signaling pathway ;FoxO signaling pathway ;Autophagy - animal ;Autophagy - yeast ;Autophagy - other eukaryotes ;Mitophagy - animal ;Mitophagy - yeast ;NOD-like receptor signaling pathway ;GABAergic synapse ;Longevity regulating pathway - worm ;Kaposi's sarcoma-associated herpesvirus infection	GO:0005737,GO:0000045	cytoplasm;autophagosome assembly
c19816/f1p0/416	416	191.108	N/A	N/A	N/A	N/A	N/A	N/A	N/A	N/A	N/A
c125/f22p18/1516	1516	190.586	Sobic.003G431700.1	ferredoxin-NADP(+)-oxidoreductase 1	N/A	N/A	N/A	K02641	Photosynthesis ;Photosynthesis proteins	GO:0055114,GO:0016491	oxidation-reduction process;oxidoreductase activity
c24422/f4p9/1019	1016	190.366	Sobic.001G177000.1	photosystem II light harvesting complex gene 2.3	N/A	N/A	N/A	K08913	Photosynthesis - antenna proteins ;Photosynthesis proteins	GO:0016020,GO:0009765	membrane;photosynthesis, light harvesting
c38847/f1p5/937	937	190.307	Sobic.005G063000.1	NAD(P)-binding Rossmann-fold superfamily protein	KOG1208	Dehydrogenases with different specificities (related to short-chain alcohol dehydrogenases)	Q	N/A	N/A	N/A	N/A
c11407/f1p1/890	890	189.812	Sobic.007G223500.2	N/A	N/A	N/A	N/A	N/A	N/A	N/A	N/A
c33225/f25p54/1235	1235	189.492	Sobic.002G338000.1	light harvesting complex photosystem II	N/A	N/A	N/A	K08915	Photosynthesis - antenna proteins ;Photosynthesis proteins	GO:0016020,GO:0009765	membrane;photosynthesis, light harvesting
c11608/f10p7/988	989	189.401	Sobic.007G052400.3	rubredoxin family protein	N/A	N/A	N/A	N/A	N/A	N/A	N/A
c39189/f1p4/858	858	189.34	Sobic.010G259100.2	Uncharacterised protein family (UPF0114)	N/A	N/A	N/A	N/A	N/A	N/A	N/A
c38791/f1p13/1193	1193	188.958	Sobic.001G491000.2	D-ribulose-5-phosphate-3-epimerase	KOG3111	D-ribulose-5-phosphate 3-epimerase	G	K01783	Pentose phosphate pathway ;Pentose and glucuronate interconversions ;Carbon fixation in photosynthetic organisms	GO:0016857,GO:0005975	racemase and epimerase activity, acting on carbohydrates and derivatives;carbohydrate metabolic process
c21967/f3p1/836	837	187.415	Sobic.001G046900.1	photosystem I subunit D-2	N/A	N/A	N/A	K02692	Photosynthesis ;Photosynthesis proteins	GO:0015979,GO:0009538,GO:0009522	photosynthesis;photosystem I reaction center;photosystem I
c14082/f3p0/950	951	187.005	Pavir.J05563.1	Histone superfamily protein	KOG1745	Histones H3 and H4	B	K11253	Chromosome and associated proteins ;Exosome ;Transcriptional misregulation in cancers ;Systemic lupus erythematosus ;Alcoholism	GO:0003677,GO:0000786	DNA binding;nucleosome
c25512/f1p2/988	988	186.898	Sobic.003G359100.1	sedoheptulose-bisphosphatase	KOG1458	Fructose-1,6-bisphosphatase	G	K01100	Carbon fixation in photosynthetic organisms	GO:0042578,GO:0042132,GO:0005975	phosphoric ester hydrolase activity;fructose 1,6-bisphosphate 1-phosphatase activity;carbohydrate metabolic process
c17799/f1p1/823	823	186.868	Sobic.003G081900.1	HSP20-like chaperones superfamily protein	KOG0710	Molecular chaperone (small heat-shock protein Hsp26/Hsp42)	O	K13993	Chaperones and folding catalysts ;Protein processing in endoplasmic reticulum	N/A	N/A
c36707/f1p12/1298	1297	186.291	Sobic.004G288700.1	plasma membrane intrinsic protein 1;4	KOG0223	Aquaporin (major intrinsic protein family)	G	K09872	Transporters	GO:0016020,GO:0006810,GO:0005215	membrane;transport;transporter activity
c36866/f1p5/1539	1537	186.222	Sobic.002G431100.1	ascorbate peroxidase 1	N/A	N/A	N/A	K00434	Ascorbate and aldarate metabolism ;Glutathione metabolism	GO:0055114,GO:0020037,GO:0006979,GO:0004601	oxidation-reduction process;heme binding;response to oxidative stress;peroxidase activity
c5056/f1p20/1021	1027	185.541	Sobic.002G288300.1	photosystem II light harvesting complex gene B1B2	N/A	N/A	N/A	K08912	Photosynthesis - antenna proteins ;Photosynthesis proteins	GO:0016020,GO:0009765	membrane;photosynthesis, light harvesting
c5090/f1p4/1151	1151	185.457	Sobic.003G132100.1	dicarboxylate diiron protein, putative (Crd1)	N/A	N/A	N/A	K04035	Porphyrin and chlorophyll metabolism	GO:0055114,GO:0046872,GO:0016491	oxidation-reduction process;metal ion binding;oxidoreductase activity
c46218/f7p30/2950	2950	184.558	Sobic.009G132900.1	pyruvate orthophosphate dikinase	N/A	N/A	N/A	K01006	Pyruvate metabolism ;Carbon fixation in photosynthetic organisms ;Carbon fixation pathways in prokaryotes	GO:0016772,GO:0016310,GO:0016301,GO:0005524,GO:0050242,GO:0006090	transferase activity, transferring phosphorus-containing groups;phosphorylation;kinase activity;ATP binding;pyruvate, phosphate dikinase activity;pyruvate metabolic process
c45645/f1p2/2982	3159	183.914	Sobic.010G160700.1	phosphoenolpyruvate carboxylase 2	N/A	N/A	N/A	K01595	Pyruvate metabolism ;Carbon fixation in photosynthetic organisms ;Carbon fixation pathways in prokaryotes ;Methane metabolism	GO:0015977,GO:0008964,GO:0006099	carbon fixation;phosphoenolpyruvate carboxylase activity;tricarboxylic acid cycle
c18521/f4p5/1497	1498	183.826	Sobic.009G033600.1	S-adenosylmethionine synthetase 1	N/A	N/A	N/A	K00789	Cysteine and methionine metabolism	GO:0006556,GO:0004478,GO:0005524	S-adenosylmethionine biosynthetic process;methionine adenosyltransferase activity;ATP binding
c47204/f1p1/2267	2267	183.41	Sobic.010G160700.1	phosphoenolpyruvate carboxylase 2	N/A	N/A	N/A	K01595	Pyruvate metabolism ;Carbon fixation in photosynthetic organisms ;Carbon fixation pathways in prokaryotes ;Methane metabolism	GO:0015977,GO:0008964,GO:0006099	carbon fixation;phosphoenolpyruvate carboxylase activity;tricarboxylic acid cycle
c831/f14p25/1189	1189	183.287	Sobic.010G259100.2	Uncharacterised protein family (UPF0114)	N/A	N/A	N/A	N/A	N/A	N/A	N/A
c13821/f5p8/1442	1445	183.085	Sobic.008G171300.1	S-adenosyl-L-methionine-dependent methyltransferases superfamily protein	KOG1540	Ubiquinone biosynthesis methyltransferase COQ5	H	K12502	Ubiquinone and other terpenoid-quinone biosynthesis	GO:0008168,GO:0008152	methyltransferase activity;metabolic process
c16375/f1p3/2456	2456	182.712	Sobic.010G160700.1	phosphoenolpyruvate carboxylase 2	N/A	N/A	N/A	K01595	Pyruvate metabolism ;Carbon fixation in photosynthetic organisms ;Carbon fixation pathways in prokaryotes ;Methane metabolism	GO:0015977,GO:0008964,GO:0006099	carbon fixation;phosphoenolpyruvate carboxylase activity;tricarboxylic acid cycle
c17399/f5p12/1214	1214	182.545	Sobic.009G123900.1	Ribosomal protein L1p/L10e family	KOG1569	50S ribosomal protein L1	J	K02863	Ribosome ;Ribosome	N/A	N/A
c36722/f1p2/2300	2301	182.466	Sobic.010G160700.1	phosphoenolpyruvate carboxylase 2	N/A	N/A	N/A	K01595	Pyruvate metabolism ;Carbon fixation in photosynthetic organisms ;Carbon fixation pathways in prokaryotes ;Methane metabolism	GO:0015977,GO:0008964,GO:0006099	carbon fixation;phosphoenolpyruvate carboxylase activity;tricarboxylic acid cycle
c33638/f5p15/1401	1401	182.022	Sobic.007G025400.1	glyceraldehyde-3-phosphate dehydrogenase C subunit 1	KOG0657	Glyceraldehyde 3-phosphate dehydrogenase	G	K00134	Glycolysis / Gluconeogenesis ;Carbon fixation in photosynthetic organisms ;Membrane trafficking ;HIF-1 signaling pathway ;Exosome ;Alzheimer's disease	GO:0055114,GO:0016620	oxidation-reduction process;oxidoreductase activity, acting on the aldehyde or oxo group of donors, NAD or NADP as acceptor
c9090/f1p1/3281	3285	181.593	Sobic.010G160700.1	phosphoenolpyruvate carboxylase 2	N/A	N/A	N/A	K01595	Pyruvate metabolism ;Carbon fixation in photosynthetic organisms ;Carbon fixation pathways in prokaryotes ;Methane metabolism	GO:0015977,GO:0008964,GO:0006099	carbon fixation;phosphoenolpyruvate carboxylase activity;tricarboxylic acid cycle
c34152/f6p13/1523	1523	180.725	Sobic.001G374400.2	Heavy metal transport/detoxification superfamily protein	KOG1603	Copper chaperone	P	N/A	N/A	GO:0046872,GO:0030001	metal ion binding;metal ion transport
c36396/f1p0/969	969	180.665	Sobic.002G057900.2	thioredoxin H-type 1	KOG0907	Thioredoxin	O	K03671	Chaperones and folding catalysts ;NOD-like receptor signaling pathway ;Fluid shear stress and atherosclerosis	GO:0045454,GO:0015035,GO:0006662	cell redox homeostasis;protein disulfide oxidoreductase activity;glycerol ether metabolic process
c39848/f36p59/1576	1579	180.646	Sobic.004G055200.1	phosphoglycerate kinase	N/A	N/A	N/A	K00927	Glycolysis / Gluconeogenesis ;Carbon fixation in photosynthetic organisms ;Exosome	GO:0006096,GO:0004618	glycolytic process;phosphoglycerate kinase activity
c712/f27p12/1332	1334	180.3	Sobic.008G179900.2	O-acetylserine (thiol) lyase (OAS-TL) isoform A1	KOG1252	Cystathionine beta-synthase and related enzymes	E	K01738	Sulfur metabolism ;Cysteine and methionine metabolism	N/A	N/A
c5961/f1p1/2512	2512	179.893	Sobic.010G160700.1	phosphoenolpyruvate carboxylase 2	N/A	N/A	N/A	K01595	Pyruvate metabolism ;Carbon fixation in photosynthetic organisms ;Carbon fixation pathways in prokaryotes ;Methane metabolism	GO:0015977,GO:0008964,GO:0006099	carbon fixation;phosphoenolpyruvate carboxylase activity;tricarboxylic acid cycle
c719/f4p6/1017	1017	179.566	Sobic.003G234400.4	beta carbonic anhydrase 4	KOG1578	Predicted carbonic anhydrase involved in protection against oxidative damage	P	K01673	Nitrogen metabolism	GO:0008270,GO:0004089	zinc ion binding;carbonate dehydratase activity
c13567/f38p73/1223	1223	178.828	Sobic.010G241000.1	photosystem II subunit O-2	N/A	N/A	N/A	K02716	Photosynthesis ;Photosynthesis proteins	GO:0042549,GO:0019898,GO:0015979,GO:0009654,GO:0009523,GO:0005509	photosystem II stabilization;extrinsic component of membrane;photosynthesis;photosystem II oxygen evolving complex;photosystem II;calcium ion binding
c14140/f3p22/1443	1443	178.422	Sobic.007G166300.1	lactate/malate dehydrogenase family protein	KOG1496	Malate dehydrogenase	C	K00051	Pyruvate metabolism ;Carbon fixation in photosynthetic organisms	GO:0055114,GO:0016491,GO:0016616,GO:0016615,GO:0006108	oxidation-reduction process;oxidoreductase activity;oxidoreductase activity, acting on the CH-OH group of donors, NAD or NADP as acceptor;malate dehydrogenase activity;malate metabolic process
c31642/f1p0/648	648	178.086	Sobic.002G291066.1	Histone superfamily protein	KOG3467	Histone H4	B	K11254	Chromosome and associated proteins ;Viral carcinogenesis ;Systemic lupus erythematosus ;Alcoholism	N/A	N/A
c5761/f2p3/1262	1262	177.907	Sobic.001G391300.1	galactinol synthase 1	KOG1950	Glycosyl transferase, family 8 - glycogenin	G	K18819	Galactose metabolism	GO:0016757,GO:0047216,GO:0006012	transferase activity, transferring glycosyl groups;inositol 3-alpha-galactosyltransferase activity;galactose metabolic process
c26919/f1p1/2484	2486	177.078	Sobic.010G160700.1	phosphoenolpyruvate carboxylase 2	N/A	N/A	N/A	K01595	Pyruvate metabolism ;Carbon fixation in photosynthetic organisms ;Carbon fixation pathways in prokaryotes ;Methane metabolism	GO:0015977,GO:0008964,GO:0006099	carbon fixation;phosphoenolpyruvate carboxylase activity;tricarboxylic acid cycle
c9782/f5p1/811	811	176.946	Sobic.008G030600.1	lipid transfer protein 3	N/A	N/A	N/A	N/A	N/A	N/A	N/A
c40361/f4p19/1055	1055	176.868	Sobic.003G431700.1	ferredoxin-NADP(+)-oxidoreductase 1	N/A	N/A	N/A	K02641	Photosynthesis ;Photosynthesis proteins	GO:0055114,GO:0016491	oxidation-reduction process;oxidoreductase activity
c29448/f1p3/1043	1043	176.147	Sobic.003G234200.6	beta carbonic anhydrase 4	KOG1578	Predicted carbonic anhydrase involved in protection against oxidative damage	P	K01673	Nitrogen metabolism	GO:0008270,GO:0004089	zinc ion binding;carbonate dehydratase activity
c1345/f3p2/874	874	175.599	Sobic.003G339200.1	N/A	N/A	N/A	N/A	N/A	N/A	N/A	N/A
c15527/f1p0/728	728	175.165	Sobic.003G365200.1	N/A	N/A	N/A	N/A	N/A	N/A	N/A	N/A
c46300/f1p4/2575	2575	174.846	Sobic.010G160700.1	phosphoenolpyruvate carboxylase 2	N/A	N/A	N/A	K01595	Pyruvate metabolism ;Carbon fixation in photosynthetic organisms ;Carbon fixation pathways in prokaryotes ;Methane metabolism	GO:0015977,GO:0008964,GO:0006099	carbon fixation;phosphoenolpyruvate carboxylase activity;tricarboxylic acid cycle
c37132/f1p2/796	796	174.81	Sobic.010G259100.2	Uncharacterised protein family (UPF0114)	N/A	N/A	N/A	N/A	N/A	N/A	N/A
c39657/f1p2/1111	1111	174.77	Sobic.002G421300.2	hydroxyproline-rich glycoprotein family protein	N/A	N/A	N/A	N/A	N/A	N/A	N/A
c15196/f3p1/1376	1377	174.729	Sobic.004G142800.1	Papain family cysteine protease	KOG1542	Cysteine proteinase Cathepsin F	O	K01373	Peptidases ;Lysosome ;Apoptosis	GO:0008234,GO:0006508	cysteine-type peptidase activity;proteolysis
c22856/f1p17/1845	1845	174.715	LOC_Os06g46770.3	polyubiquitin 10	KOG0005,KOG0001	Ubiquitin-like protein;Ubiquitin-like protein;Ubiquitin and ubiquitin-like proteins;Ubiquitin and ubiquitin-like proteins	O;D;O;R	K08770	Ubiquitin system ;PPAR signaling pathway	N/A	N/A
c175/f11p62/1242	1242	174.587	Sobic.002G338000.1	light harvesting complex photosystem II	N/A	N/A	N/A	K08915	Photosynthesis - antenna proteins ;Photosynthesis proteins	GO:0016020,GO:0009765	membrane;photosynthesis, light harvesting
c4753/f2p0/958	960	174.53	Sobic.001G386200.1	atypical CYS HIS rich thioredoxin 4	KOG0907	Thioredoxin	O	N/A	N/A	GO:0045454,GO:0015035,GO:0006662	cell redox homeostasis;protein disulfide oxidoreductase activity;glycerol ether metabolic process
c259/f31p27/1157	1157	174.129	Sobic.003G370000.1	Chlorophyll A-B binding family protein	N/A	N/A	N/A	K03542	Photosynthesis ;Photosynthesis proteins	N/A	N/A
c767/f24p7/1075	1076	173.449	Sobic.001G070500.1	photosystem I subunit F	N/A	N/A	N/A	K02694	Photosynthesis ;Photosynthesis proteins	GO:0015979,GO:0009538,GO:0009522	photosynthesis;photosystem I reaction center;photosystem I
c16304/f1p2/1096	1092	173.248	Sobic.003G243600.1	ubiquitin conjugating enzyme 9	KOG0417	Ubiquitin-protein ligase	O	K06689	Protein processing in endoplasmic reticulum ;Ubiquitin mediated proteolysis ;Ubiquitin system ;MAPK signaling pathway - fly ;Toll and Imd signaling pathway	N/A	N/A
c33382/f2p10/1228	1228	173.223	Sobic.010G186400.1	Tetratricopeptide repeat (TPR)-like superfamily protein	N/A	N/A	N/A	N/A	N/A	N/A	N/A
c31052/f1p0/681	680	172.845	Sobic.010G082800.1	CP12 domain-containing protein 1	N/A	N/A	N/A	N/A	N/A	N/A	N/A
c1075/f7p7/1259	1259	172.834	Sobic.010G223200.1	FtsH extracellular protease family	N/A	N/A	N/A	K03798	Peptidases ;Chaperones and folding catalysts	GO:0016887,GO:0005524,GO:0006508,GO:0004222	ATPase activity;ATP binding;proteolysis;metalloendopeptidase activity
c35504/f1p0/775	775	172.821	Sobic.002G052000.2	Chlorophyll A-B binding family protein	N/A	N/A	N/A	N/A	N/A	N/A	N/A
c8317/f2p7/1420	1420	172.784	Sobic.009G183700.1	Phosphoglycerate kinase family protein	N/A	N/A	N/A	K00927	Glycolysis / Gluconeogenesis ;Carbon fixation in photosynthetic organisms ;Exosome	GO:0006096,GO:0004618	glycolytic process;phosphoglycerate kinase activity
c5980/f1p1/609	611	172.776	Sobic.003G437600.2	thioredoxin Y1	KOG0910	Thioredoxin-like protein	O	N/A	N/A	GO:0045454,GO:0015035,GO:0006662	cell redox homeostasis;protein disulfide oxidoreductase activity;glycerol ether metabolic process
c13878/f28p65/1506	1507	172.735	Sobic.003G431700.1	ferredoxin-NADP(+)-oxidoreductase 1	N/A	N/A	N/A	K02641	Photosynthesis ;Photosynthesis proteins	GO:0055114,GO:0016491	oxidation-reduction process;oxidoreductase activity
c32686/f2p11/1307	1307	172.432	Sobic.006G140700.1	NAD(P)-linked oxidoreductase superfamily protein	KOG1575	Voltage-gated shaker-like K+ channel, subunit beta/KCNAB	C	N/A	N/A	N/A	N/A
c10525/f1p1/839	839	171.966	Sobic.001G085400.1	Ribosomal protein L13 family protein	KOG3204	60S ribosomal protein L13a	J	K02872	Ribosome ;Ribosome	GO:0006412,GO:0005840,GO:0003735,GO:0015934	translation;ribosome;structural constituent of ribosome;large ribosomal subunit
c12741/f10p7/1129	1131	171.731	Sobic.008G038300.1	enzyme binding;tetrapyrrole binding	N/A	N/A	N/A	N/A	N/A	N/A	N/A
c35773/f7p6/1499	1498	171.62	Sobic.002G036000.4	Aldolase-type TIM barrel family protein	N/A	N/A	N/A	K11517	Glyoxylate and dicarboxylate metabolism ;Peroxisome	GO:0016491	oxidoreductase activity
c31779/f1p0/590	590	171.566	Sobic.003G437600.2	thioredoxin Y1	KOG0910	Thioredoxin-like protein	O	N/A	N/A	GO:0045454,GO:0015035,GO:0006662	cell redox homeostasis;protein disulfide oxidoreductase activity;glycerol ether metabolic process
c40083/f4p14/1365	1366	171.565	Sobic.009G163900.1	heat shock protein 70	N/A	N/A	N/A	K03283	Protein phosphatase and associated proteins ;Spliceosome ;Spliceosome ;Ribosome biogenesis ;Mitochondrial biogenesis ;Chaperones and folding catalysts ;Protein processing in endoplasmic reticulum ;Membrane trafficking ;Proteasome ;MAPK signaling pathway ;Cell adhesion molecules and their ligands ;Endocytosis ;Exosome ;Antigen processing and presentation ;Estrogen signaling pathway ;Longevity regu…	N/A	N/A
c24647/f2p0/931	931	171.456	Sobic.007G169500.1	Ribosomal protein L1p/L10e family	KOG1570	60S ribosomal protein L10A	J	K02865	Ribosome ;Ribosome	N/A	N/A
c2139/f2p1/842	842	171.038	Sobic.003G064300.2	N/A	N/A	N/A	N/A	N/A	N/A	N/A	N/A
c39253/f9p7/1031	1034	170.609	Sobic.002G339200.2	light-harvesting chlorophyll B-binding protein 3	N/A	N/A	N/A	K08914	Photosynthesis - antenna proteins ;Photosynthesis proteins	GO:0016020,GO:0009765	membrane;photosynthesis, light harvesting
c32230/f1p3/1194	1195	170.439	Sobic.007G166300.1	lactate/malate dehydrogenase family protein	KOG1496	Malate dehydrogenase	C	K00051	Pyruvate metabolism ;Carbon fixation in photosynthetic organisms	GO:0055114,GO:0016491,GO:0016616,GO:0016615,GO:0006108	oxidation-reduction process;oxidoreductase activity;oxidoreductase activity, acting on the CH-OH group of donors, NAD or NADP as acceptor;malate dehydrogenase activity;malate metabolic process
c330/f27p70/1254	1255	169.725	Sobic.002G352100.1	photosystem I light harvesting complex gene 2	N/A	N/A	N/A	K08908	Photosynthesis - antenna proteins ;Photosynthesis proteins	GO:0016020,GO:0009765	membrane;photosynthesis, light harvesting
c39832/f2p2/1087	1087	169.403	Sobic.003G209900.1	photosystem II light harvesting complex gene B1B2	N/A	N/A	N/A	K08912	Photosynthesis - antenna proteins ;Photosynthesis proteins	GO:0016020,GO:0009765	membrane;photosynthesis, light harvesting
c654/f7p5/1124	1125	169.036	Sobic.008G065000.1	Mog1/PsbP/DUF1795-like photosystem II reaction center PsbP family protein	N/A	N/A	N/A	N/A	N/A	GO:0019898,GO:0015979,GO:0009654,GO:0009523,GO:0005509	extrinsic component of membrane;photosynthesis;photosystem II oxygen evolving complex;photosystem II;calcium ion binding
c23694/f4p22/1665	1664	168.976	Zm00008a038180_T01	conserved peptide upstream open reading frame 10	N/A	N/A	N/A	N/A	N/A	N/A	N/A
c19971/f4p4/1428	1447	168.966	Zm00008a015155_T01	light harvesting complex of photosystem II 5	N/A	N/A	N/A	K08916	Photosynthesis - antenna proteins ;Photosynthesis proteins	GO:0016020,GO:0009765	membrane;photosynthesis, light harvesting
c7765/f1p0/770	770	168.748	Sobic.008G030600.1	lipid transfer protein 3	N/A	N/A	N/A	N/A	N/A	N/A	N/A
c23830/f2p2/939	939	168.731	Sobic.008G064700.1	galactose-1-phosphate guanylyltransferase (GDP)s;GDP-D-glucose phosphorylases;quercetin 4\'-O-glucosyltransferases	KOG2720	Predicted hydrolase (HIT family)	R	K14190	Ascorbate and aldarate metabolism	GO:0080048	GDP-D-glucose phosphorylase activity
c33022/f1p1/596	596	168.053	Sobic.003G238000.1	RAN GTPase 3	KOG0096	GTPase Ran/TC4/GSP1 (nuclear protein transport pathway), small G protein superfamily	U	K07936	Transfer RNA biogenesis ;RNA transport ;Messenger RNA Biogenesis ;Ribosome biogenesis in eukaryotes ;Ribosome biogenesis ;Chromosome and associated proteins ;GTP-binding proteins ;Exosome ;HTLV-I infection ;Epstein-Barr virus infection	GO:0005525	GTP binding
c24748/f2p2/783	782	167.767	Sobic.001G068600.2	hydroxyproline-rich glycoprotein family protein	N/A	N/A	N/A	N/A	N/A	N/A	N/A
c12520/f1p3/1039	1039	167.708	Sobic.002G047400.1	protein containing PDZ domain, a K-box domain, and a TPR region	N/A	N/A	N/A	N/A	N/A	N/A	N/A
c5216/f4p6/1384	1384	167.353	Sobic.003G132100.1	dicarboxylate diiron protein, putative (Crd1)	N/A	N/A	N/A	K04035	Porphyrin and chlorophyll metabolism	GO:0055114,GO:0046872,GO:0016491	oxidation-reduction process;metal ion binding;oxidoreductase activity
c23107/f1p11/1370	1370	165.925	Sobic.004G050100.3	polyubiquitin 10	KOG0001	Ubiquitin and ubiquitin-like proteins;Ubiquitin and ubiquitin-like proteins	O;R	K08770	Ubiquitin system ;PPAR signaling pathway	N/A	N/A
c26742/f1p0/488	488	165.32	GRMZM2G171648_T01	N/A	N/A	N/A	N/A	N/A	N/A	N/A	N/A
c6235/f1p1/912	918	165.28	Sobic.001G371900.1	copper/zinc superoxide dismutase 1	KOG0441	Cu2+/Zn2+ superoxide dismutase SOD1	P	K04565	Peroxisome ;Longevity regulating pathway - multiple species ;Amyotrophic lateral sclerosis (ALS) ;Huntington's disease ;Prion diseases	GO:0055114,GO:0046872,GO:0006801	oxidation-reduction process;metal ion binding;superoxide metabolic process
c13010/f3p1/831	831	165.064	Sobic.008G049200.2	N/A	N/A	N/A	N/A	N/A	N/A	GO:0006950	response to stress
c867/f12p1/881	882	164.975	Sobic.006G186700.1	histone H1-3	N/A	N/A	N/A	K11275	Chromosome and associated proteins	GO:0006334,GO:0005634,GO:0003677,GO:0000786	nucleosome assembly;nucleus;DNA binding;nucleosome
c26784/f1p1/1144	1144	164.957	Sobic.002G403600.1	Haloacid dehalogenase-like hydrolase (HAD) superfamily protein	KOG3085	Predicted hydrolase (HAD superfamily)	R	N/A	N/A	N/A	N/A
c44339/f1p2/2654	2656	164.93	Sobic.009G132900.3	pyruvate orthophosphate dikinase	N/A	N/A	N/A	K01006	Pyruvate metabolism ;Carbon fixation in photosynthetic organisms ;Carbon fixation pathways in prokaryotes	GO:0016772,GO:0016310,GO:0016301,GO:0005524,GO:0050242,GO:0006090	transferase activity, transferring phosphorus-containing groups;phosphorylation;kinase activity;ATP binding;pyruvate, phosphate dikinase activity;pyruvate metabolic process
c33276/f2p3/1069	1069	163.913	Sobic.010G005500.1	ferredoxin-NADP(+)-oxidoreductase 2	N/A	N/A	N/A	K02641	Photosynthesis ;Photosynthesis proteins	GO:0055114,GO:0016491	oxidation-reduction process;oxidoreductase activity
c9269/f1p0/619	619	163.837	Sobic.009G240900.1	RAN GTPase 3	KOG0096	GTPase Ran/TC4/GSP1 (nuclear protein transport pathway), small G protein superfamily	U	K07936	Transfer RNA biogenesis ;RNA transport ;Messenger RNA Biogenesis ;Ribosome biogenesis in eukaryotes ;Ribosome biogenesis ;Chromosome and associated proteins ;GTP-binding proteins ;Exosome ;HTLV-I infection ;Epstein-Barr virus infection	GO:0005525	GTP binding
c39482/f1p2/962	962	163.519	Sobic.010G005500.1	ferredoxin-NADP(+)-oxidoreductase 2	N/A	N/A	N/A	K02641	Photosynthesis ;Photosynthesis proteins	GO:0055114,GO:0016491	oxidation-reduction process;oxidoreductase activity
c18726/f3p4/1223	1223	163.389	Sobic.009G239900.1	ketol-acid reductoisomerase	N/A	N/A	N/A	K00053	Valine;Pantothenate and CoA biosynthesis	GO:0055114,GO:0009082,GO:0004455,GO:0016491	oxidation-reduction process;branched-chain amino acid biosynthetic process;ketol-acid reductoisomerase activity;oxidoreductase activity
c39440/f1p0/438	439	162.941	Sobic.002G386500.1	N/A	N/A	N/A	N/A	N/A	N/A	N/A	N/A
c842/f8p1/873	873	162.451	Sobic.003G039400.1	17.6 kDa class II heat shock protein	N/A	N/A	N/A	K13993	Chaperones and folding catalysts ;Protein processing in endoplasmic reticulum	N/A	N/A
c31749/f1p6/2001	1995	162.422	Sobic.010G241000.1	photosystem II subunit O-2	N/A	N/A	N/A	K02716	Photosynthesis ;Photosynthesis proteins	GO:0042549,GO:0019898,GO:0015979,GO:0009654,GO:0009523,GO:0005509	photosystem II stabilization;extrinsic component of membrane;photosynthesis;photosystem II oxygen evolving complex;photosystem II;calcium ion binding
c16446/f3p5/755	758	162.328	Sobic.005G042000.1	ribulose bisphosphate carboxylase small chain 1A	N/A	N/A	N/A	K01602	Glyoxylate and dicarboxylate metabolism ;Carbon fixation in photosynthetic organisms	N/A	N/A
c11392/f6p3/1849	1852	162.319	Sobic.004G233200.1	Integrase-type DNA-binding superfamily protein	N/A	N/A	N/A	K09286	Transcription factors	GO:0006355,GO:0003700	regulation of transcription, DNA-templated;DNA binding transcription factor activity
c10799/f2p0/1221	1221	162.182	Sobic.010G149300.1	ubiquitin-conjugating enzyme 28	KOG0417	Ubiquitin-protein ligase	O	K06689	Protein processing in endoplasmic reticulum ;Ubiquitin mediated proteolysis ;Ubiquitin system ;MAPK signaling pathway - fly ;Toll and Imd signaling pathway	N/A	N/A
c13995/f3p3/837	837	161.459	Sobic.002G052100.1	Chlorophyll A-B binding family protein	N/A	N/A	N/A	N/A	N/A	N/A	N/A
c12497/f2p4/969	970	161.342	Sobic.002G316700.1	ATPase, F1 complex, gamma subunit protein	KOG1531	F0F1-type ATP synthase, gamma subunit	C	K02115	Oxidative phosphorylation ;Photosynthesis ;Photosynthesis proteins	GO:0046961,GO:0046933,GO:0045261,GO:0015986	proton-transporting ATPase activity, rotational mechanism;proton-transporting ATP synthase activity, rotational mechanism;proton-transporting ATP synthase complex, catalytic core F(1);ATP synthesis coupled proton transport
c43832/f1p7/1973	1976	161.034	Sobic.009G132900.3	pyruvate orthophosphate dikinase	N/A	N/A	N/A	K01006	Pyruvate metabolism ;Carbon fixation in photosynthetic organisms ;Carbon fixation pathways in prokaryotes	GO:0016772,GO:0016310,GO:0016301,GO:0005524,GO:0050242,GO:0006090	transferase activity, transferring phosphorus-containing groups;phosphorylation;kinase activity;ATP binding;pyruvate, phosphate dikinase activity;pyruvate metabolic process
c37848/f1p0/1080	1080	160.883	Sobic.006G013800.1	N/A	N/A	N/A	N/A	N/A	N/A	N/A	N/A
c23710/f2p4/1059	1060	160.863	Sobic.001G391300.1	galactinol synthase 1	KOG1950	Glycosyl transferase, family 8 - glycogenin	G	K18819	Galactose metabolism	GO:0016757,GO:0047216,GO:0006012	transferase activity, transferring glycosyl groups;inositol 3-alpha-galactosyltransferase activity;galactose metabolic process
c24461/f3p3/1081	1081	160.726	Sobic.003G050000.1	Putative thiol-disulphide oxidoreductase DCC	N/A	N/A	N/A	N/A	N/A	N/A	N/A
c39643/f1p0/740	740	160.6	Zm00008a001659_T01	Histone superfamily protein	KOG1745	Histones H3 and H4	B	K11253	Chromosome and associated proteins ;Exosome ;Transcriptional misregulation in cancers ;Systemic lupus erythematosus ;Alcoholism	GO:0003677,GO:0000786	DNA binding;nucleosome
c12556/f2p28/1133	1133	160.432	Sobic.007G034300.1	N/A	N/A	N/A	N/A	N/A	N/A	N/A	N/A
c15290/f1p1/463	463	159.987	Sobic.010G229450.1	N/A	N/A	N/A	N/A	N/A	N/A	N/A	N/A
c2338/f1p2/3233	3222	159.628	Sobic.009G132900.1	pyruvate orthophosphate dikinase	N/A	N/A	N/A	K01006	Pyruvate metabolism ;Carbon fixation in photosynthetic organisms ;Carbon fixation pathways in prokaryotes	GO:0016772,GO:0016310,GO:0016301,GO:0005524,GO:0050242,GO:0006090	transferase activity, transferring phosphorus-containing groups;phosphorylation;kinase activity;ATP binding;pyruvate, phosphate dikinase activity;pyruvate metabolic process
c4073/f1p2/1295	1295	159.503	Sobic.001G420100.1	heat shock protein 70	N/A	N/A	N/A	K03283	Protein phosphatase and associated proteins ;Spliceosome ;Spliceosome ;Ribosome biogenesis ;Mitochondrial biogenesis ;Chaperones and folding catalysts ;Protein processing in endoplasmic reticulum ;Membrane trafficking ;Proteasome ;MAPK signaling pathway ;Cell adhesion molecules and their ligands ;Endocytosis ;Exosome ;Antigen processing and presentation ;Estrogen signaling pathway ;Longevity regu…	N/A	N/A
c44467/f1p0/795	795	158.652	Sobic.001G134400.1	Cox19-like CHCH family protein	N/A	N/A	N/A	N/A	N/A	N/A	N/A
c4446/f8p24/1304	1304	158.637	Sobic.002G316700.1	ATPase, F1 complex, gamma subunit protein	KOG1531	F0F1-type ATP synthase, gamma subunit	C	K02115	Oxidative phosphorylation ;Photosynthesis ;Photosynthesis proteins	GO:0046961,GO:0046933,GO:0045261,GO:0015986	proton-transporting ATPase activity, rotational mechanism;proton-transporting ATP synthase activity, rotational mechanism;proton-transporting ATP synthase complex, catalytic core F(1);ATP synthesis coupled proton transport
c15247/f1p4/1099	1099	158.499	Sobic.009G231300.1	Drought-responsive family protein	N/A	N/A	N/A	N/A	N/A	N/A	N/A
c39917/f3p3/1100	1102	158.293	Sobic.002G125900.1	ORMDL family protein	KOG3319	Predicted membrane protein	S	N/A	N/A	GO:0016021,GO:0005789	integral component of membrane;endoplasmic reticulum membrane
c35500/f1p3/563	563	158.274	Sobic.007G135800.1	Ribosomal protein L12/ ATP-dependent Clp protease adaptor protein ClpS family protein	N/A	N/A	N/A	K06891	Protein folding and associated processing	GO:0030163	protein catabolic process
c27206/f1p3/1453	1456	158.042	Sobic.003G042700.2	Serinc-domain containing serine and sphingolipid biosynthesis protein	KOG2592	Tumor differentially expressed (TDE) protein	S	N/A	N/A	GO:0016020	membrane
c1319/f14p6/907	906	157.841	Sobic.009G143100.1	photosynthetic electron transfer C	KOG1671	Ubiquinol cytochrome c reductase, subunit RIP1	C	K02636	Photosynthesis ;Photosynthesis proteins	GO:0055114,GO:0051537,GO:0016491,GO:0042651,GO:0009496,GO:0016679	oxidation-reduction process;2 iron, 2 sulfur cluster binding;oxidoreductase activity;thylakoid membrane;plastoquinol--plastocyanin reductase activity;oxidoreductase activity, acting on diphenols and related substances as donors
c6536/f1p0/765	765	157.735	Sobic.009G233400.1	Ribosomal protein L18ae/LX family protein	KOG0829	60S ribosomal protein L18A	J	K02882	Ribosome ;Ribosome	GO:0006412,GO:0005840,GO:0003735	translation;ribosome;structural constituent of ribosome
c16126/f3p3/877	877	156.873	Sobic.010G000500.1	plastocyanin 1	N/A	N/A	N/A	K02638	Photosynthesis ;Photosynthesis proteins	N/A	N/A
c11237/f1p1/921	915	156.649	Sobic.003G246700.1	SufE/NifU family protein	KOG3361	Iron binding protein involved in Fe-S cluster formation	C	N/A	N/A	GO:0051536,GO:0016226,GO:0005506	iron-sulfur cluster binding;iron-sulfur cluster assembly;iron ion binding
c1308/f2p6/1617	1617	156.62	Sobic.008G064700.1	galactose-1-phosphate guanylyltransferase (GDP)s;GDP-D-glucose phosphorylases;quercetin 4\'-O-glucosyltransferases	KOG2720	Predicted hydrolase (HIT family)	R	K14190	Ascorbate and aldarate metabolism	GO:0080048	GDP-D-glucose phosphorylase activity
c36605/f1p61/1360	1360	156.502	N/A	N/A	N/A	N/A	N/A	N/A	N/A	N/A	N/A
c34406/f8p4/1225	1226	156.33	Sobic.009G033600.1	S-adenosylmethionine synthetase 1	N/A	N/A	N/A	K00789	Cysteine and methionine metabolism	GO:0006556,GO:0004478,GO:0005524	S-adenosylmethionine biosynthetic process;methionine adenosyltransferase activity;ATP binding
c17303/f1p0/775	776	155.674	Sobic.001G068600.2	hydroxyproline-rich glycoprotein family protein	N/A	N/A	N/A	N/A	N/A	N/A	N/A
c10723/f2p3/1684	1685	155.654	Sobic.007G101500.1	ADP glucose pyrophosphorylase 1	KOG1322	GDP-mannose pyrophosphorylase/mannose-1-phosphate guanylyltransferase	M	K00975	Starch and sucrose metabolism ;Amino sugar and nucleotide sugar metabolism ;Biofilm formation - Escherichia coli	GO:0016779,GO:0009058	nucleotidyltransferase activity;biosynthetic process
c10676/f1p21/1376	1376	155.34	Sobic.008G033200.2	Aluminium induced protein with YGL and LRDR motifs	N/A	N/A	N/A	N/A	N/A	N/A	N/A
c33595/f8p44/1193	1193	155.23	Sobic.004G288700.1	plasma membrane intrinsic protein 1;4	KOG0223	Aquaporin (major intrinsic protein family)	G	K09872	Transporters	GO:0016020,GO:0006810,GO:0005215	membrane;transport;transporter activity
c2413/f5p13/1415	1415	155.091	Sobic.003G132100.1	dicarboxylate diiron protein, putative (Crd1)	N/A	N/A	N/A	K04035	Porphyrin and chlorophyll metabolism	GO:0055114,GO:0046872,GO:0016491	oxidation-reduction process;metal ion binding;oxidoreductase activity
c32222/f2p3/1240	1240	155.027	Sobic.002G277100.1	triosephosphate isomerase	KOG1643	Triosephosphate isomerase	G	K01803	Glycolysis / Gluconeogenesis ;Fructose and mannose metabolism ;Inositol phosphate metabolism ;Carbon fixation in photosynthetic organisms ;Exosome	GO:0008152,GO:0004807	metabolic process;triose-phosphate isomerase activity
c13450/f8p2/1049	1049	154.956	Sobic.009G143100.1	photosynthetic electron transfer C	KOG1671	Ubiquinol cytochrome c reductase, subunit RIP1	C	K02636	Photosynthesis ;Photosynthesis proteins	GO:0055114,GO:0051537,GO:0016491,GO:0042651,GO:0009496,GO:0016679	oxidation-reduction process;2 iron, 2 sulfur cluster binding;oxidoreductase activity;thylakoid membrane;plastoquinol--plastocyanin reductase activity;oxidoreductase activity, acting on diphenols and related substances as donors
c21765/f3p1/906	907	154.934	Sobic.010G005300.1	Ribosomal protein L6 family	KOG3255	60S ribosomal protein L9	J	K02940	Ribosome ;Ribosome	GO:0019843,GO:0006412,GO:0005840,GO:0003735	rRNA binding;translation;ribosome;structural constituent of ribosome
c16908/f1p3/768	768	154.572	Sobic.008G049200.2	N/A	N/A	N/A	N/A	N/A	N/A	GO:0006950	response to stress
c28531/f5p11/1305	1305	154.295	Sobic.003G002300.1	Glucose-6-phosphate/phosphate translocator-related	KOG1441	Glucose-6-phosphate/phosphate and phosphoenolpyruvate/phosphate antiporter;Glucose-6-phosphate/phosphate and phosphoenolpyruvate/phosphate antiporter	E;G	K15283	Transporters	N/A	N/A
c1666/f2p6/1011	1015	154.043	Sobic.009G143100.1	photosynthetic electron transfer C	KOG1671	Ubiquinol cytochrome c reductase, subunit RIP1	C	K02636	Photosynthesis ;Photosynthesis proteins	GO:0055114,GO:0051537,GO:0016491,GO:0042651,GO:0009496,GO:0016679	oxidation-reduction process;2 iron, 2 sulfur cluster binding;oxidoreductase activity;thylakoid membrane;plastoquinol--plastocyanin reductase activity;oxidoreductase activity, acting on diphenols and related substances as donors
c354/f29p21/1092	1092	153.917	Sobic.010G259100.2	Uncharacterised protein family (UPF0114)	N/A	N/A	N/A	N/A	N/A	N/A	N/A
c18789/f1p2/699	699	153.722	Sobic.001G505100.1	gamma tonoplast intrinsic protein	KOG0223	Aquaporin (major intrinsic protein family)	G	K09873	Transporters	GO:0016020,GO:0006810,GO:0005215	membrane;transport;transporter activity
c34313/f8p8/1129	1139	153.627	Sobic.002G431100.1	ascorbate peroxidase 1	N/A	N/A	N/A	K00434	Ascorbate and aldarate metabolism ;Glutathione metabolism	GO:0055114,GO:0020037,GO:0006979,GO:0004601	oxidation-reduction process;heme binding;response to oxidative stress;peroxidase activity
c20623/f1p0/911	911	153.335	Sobic.008G185900.1	cold, circadian rhythm, and rna binding 2	N/A	N/A	N/A	N/A	N/A	GO:0003676	nucleic acid binding
c16656/f2p0/894	894	153.139	Sobic.009G183700.1	Phosphoglycerate kinase family protein	N/A	N/A	N/A	K00927	Glycolysis / Gluconeogenesis ;Carbon fixation in photosynthetic organisms ;Exosome	GO:0006096,GO:0004618	glycolytic process;phosphoglycerate kinase activity
c27540/f1p4/1543	1543	153.022	Sobic.001G519800.1	glyceraldehyde-3-phosphate dehydrogenase B subunit	KOG0657	Glyceraldehyde 3-phosphate dehydrogenase	G	K05298	Carbon fixation in photosynthetic organisms	GO:0055114,GO:0016620	oxidation-reduction process;oxidoreductase activity, acting on the aldehyde or oxo group of donors, NAD or NADP as acceptor
c989/f3p1/997	998	152.942	Sobic.003G234400.4	beta carbonic anhydrase 4	KOG1578	Predicted carbonic anhydrase involved in protection against oxidative damage	P	K01673	Nitrogen metabolism	GO:0008270,GO:0004089	zinc ion binding;carbonate dehydratase activity
c11864/f5p5/1266	1266	152.499	GRMZM5G834952_T01	N/A	N/A	N/A	N/A	N/A	N/A	N/A	N/A
c19987/f1p3/1211	1211	152.236	Sobic.002G339200.2	light-harvesting chlorophyll B-binding protein 3	N/A	N/A	N/A	K08914	Photosynthesis - antenna proteins ;Photosynthesis proteins	GO:0016020,GO:0009765	membrane;photosynthesis, light harvesting
c21575/f1p1/893	893	151.935	Sobic.002G310900.1	Calcium-dependent lipid-binding (CaLB domain) family protein	KOG1030	Predicted Ca2+-dependent phospholipid-binding protein	R	N/A	N/A	GO:0005515	protein binding
c25218/f1p1/777	777	151.908	Sobic.010G259100.2	Uncharacterised protein family (UPF0114)	N/A	N/A	N/A	N/A	N/A	N/A	N/A
c13945/f2p2/738	738	151.7	Sobic.010G109500.1	N/A	N/A	N/A	N/A	N/A	N/A	N/A	N/A
c20872/f1p0/792	792	151.322	Sobic.002G330000.1	histone H2A 2	KOG1756	Histone 2A	B	K11251	Chromosome and associated proteins ;Exosome ;Necroptosis ;Systemic lupus erythematosus ;Alcoholism	GO:0003677	DNA binding
c4981/f3p27/1266	1266	151.289	Sobic.004G055200.2	phosphoglycerate kinase	N/A	N/A	N/A	K00927	Glycolysis / Gluconeogenesis ;Carbon fixation in photosynthetic organisms ;Exosome	GO:0006096,GO:0004618	glycolytic process;phosphoglycerate kinase activity
c19597/f1p0/841	841	150.283	Sobic.009G164900.1	histone H2A 12	KOG1756	Histone 2A	B	K11251	Chromosome and associated proteins ;Exosome ;Necroptosis ;Systemic lupus erythematosus ;Alcoholism	GO:0003677	DNA binding
c14454/f1p8/1511	1511	150.212	Sobic.003G234200.6	beta carbonic anhydrase 4	KOG1578	Predicted carbonic anhydrase involved in protection against oxidative damage	P	K01673	Nitrogen metabolism	GO:0008270,GO:0004089	zinc ion binding;carbonate dehydratase activity
c11346/f2p1/1044	1044	149.906	GRMZM2G124644_T01	Chaperone DnaJ-domain superfamily protein	N/A	N/A	N/A	N/A	N/A	N/A	N/A
c14941/f1p9/866	866	149.871	Sobic.009G130700.1	thylakoid lumen 18.3 kDa protein	N/A	N/A	N/A	N/A	N/A	N/A	N/A
c27723/f1p1/1198	1200	149.57	Sobic.010G223200.1	FtsH extracellular protease family	N/A	N/A	N/A	K03798	Peptidases ;Chaperones and folding catalysts	GO:0016887,GO:0005524,GO:0006508,GO:0004222	ATPase activity;ATP binding;proteolysis;metalloendopeptidase activity
c429/f25p10/1361	1361	149.546	Sobic.010G186400.1	Tetratricopeptide repeat (TPR)-like superfamily protein	N/A	N/A	N/A	N/A	N/A	N/A	N/A
c9093/f1p6/706	706	149.527	GRMZM2G033885_T01	light harvesting complex photosystem II	N/A	N/A	N/A	K08915	Photosynthesis - antenna proteins ;Photosynthesis proteins	GO:0016020,GO:0009765	membrane;photosynthesis, light harvesting
c16351/f1p0/893	893	149.253	Zm00008a012180_T01	cyclophilin 5	KOG0880	Peptidyl-prolyl cis-trans isomerase	O	K01802	Protein folding and associated processing	GO:0006457,GO:0003755,GO:0000413	protein folding;peptidyl-prolyl cis-trans isomerase activity;protein peptidyl-prolyl isomerization
c39939/f1p1/2423	2423	149.17	Sobic.010G160700.1	phosphoenolpyruvate carboxylase 2	N/A	N/A	N/A	K01595	Pyruvate metabolism ;Carbon fixation in photosynthetic organisms ;Carbon fixation pathways in prokaryotes ;Methane metabolism	GO:0015977,GO:0008964,GO:0006099	carbon fixation;phosphoenolpyruvate carboxylase activity;tricarboxylic acid cycle
c33667/f2p9/1100	1100	149.163	Sobic.002G352100.1	photosystem I light harvesting complex gene 2	N/A	N/A	N/A	K08908	Photosynthesis - antenna proteins ;Photosynthesis proteins	GO:0016020,GO:0009765	membrane;photosynthesis, light harvesting
c40139/f25p66/1215	1215	149.033	Sobic.007G009200.1	adenosine monophosphate kinase	KOG3078	Adenylate kinase	F	K00939	Purine metabolism ;Thiamine metabolism ;Exosome	GO:0019205,GO:0006139,GO:0005524	nucleobase-containing compound kinase activity;nucleobase-containing compound metabolic process;ATP binding
c26110/f1p0/794	792	148.836	Sobic.009G054800.1	Ribosomal protein S27a / Ubiquitin family protein	KOG0004	Ubiquitin/40S ribosomal protein S27a fusion	J	K02977	Ribosome ;Ribosome ;Exosome	GO:0006412,GO:0005840,GO:0003735	translation;ribosome;structural constituent of ribosome
c5578/f1p2/3218	3218	148.067	GRMZM5G806488_T01	Ribosomal protein S7p/S5e family protein	KOG3291	Ribosomal protein S7	J	K02992	Ribosome ;Ribosome	GO:0006412	translation
c23981/f13p19/1276	1276	148.066	Sobic.010G262500.1	glyceraldehyde-3-phosphate dehydrogenase C subunit 1	KOG0657	Glyceraldehyde 3-phosphate dehydrogenase	G	K00134	Glycolysis / Gluconeogenesis ;Carbon fixation in photosynthetic organisms ;Membrane trafficking ;HIF-1 signaling pathway ;Exosome ;Alzheimer's disease	GO:0055114,GO:0016620	oxidation-reduction process;oxidoreductase activity, acting on the aldehyde or oxo group of donors, NAD or NADP as acceptor
c16047/f1p3/1123	1126	147.946	Sobic.001G410200.1	ascorbate peroxidase 1	N/A	N/A	N/A	K00434	Ascorbate and aldarate metabolism ;Glutathione metabolism	GO:0055114,GO:0020037,GO:0006979,GO:0004601	oxidation-reduction process;heme binding;response to oxidative stress;peroxidase activity
c28487/f1p0/915	918	147.886	GRMZM2G402092_T01	N/A	N/A	N/A	N/A	N/A	N/A	N/A	N/A
c40067/f2p4/978	978	147.832	Sobic.003G234400.4	beta carbonic anhydrase 4	KOG1578	Predicted carbonic anhydrase involved in protection against oxidative damage	P	K01673	Nitrogen metabolism	GO:0008270,GO:0004089	zinc ion binding;carbonate dehydratase activity
c34105/f1p2/2410	2409	147.456	Sobic.010G160700.1	phosphoenolpyruvate carboxylase 2	N/A	N/A	N/A	K01595	Pyruvate metabolism ;Carbon fixation in photosynthetic organisms ;Carbon fixation pathways in prokaryotes ;Methane metabolism	GO:0015977,GO:0008964,GO:0006099	carbon fixation;phosphoenolpyruvate carboxylase activity;tricarboxylic acid cycle
c11329/f1p14/1120	1120	146.93	Sobic.006G176700.1	plasma membrane intrinsic protein 1;4	KOG0223	Aquaporin (major intrinsic protein family)	G	K09872	Transporters	GO:0016020,GO:0006810,GO:0005215	membrane;transport;transporter activity
c35363/f1p1/949	949	146.751	Sobic.009G023200.1	N/A	N/A	N/A	N/A	N/A	N/A	N/A	N/A
c15053/f1p1/1064	1064	146.561	Sobic.001G040800.1	ADP-ribosylation factor A1F	KOG0070	GTP-binding ADP-ribosylation factor Arf1	U	K07937,K07977	Membrane trafficking ;Phospholipase D signaling pathway ;GTP-binding proteins ;Endocytosis ;Exosome ;Vibrio cholerae infection ;Legionellosis ;GTP-binding proteins	N/A	N/A
c10355/f9p33/1865	1865	146.395	Sobic.001G472800.1	myo-inositol-1-phosphate synthase 2	N/A	N/A	N/A	K01858	Inositol phosphate metabolism ;Streptomycin biosynthesis	GO:0008654,GO:0006021,GO:0004512	phospholipid biosynthetic process;inositol biosynthetic process;inositol-3-phosphate synthase activity
c23635/f4p6/1116	1116	146.375	Sobic.001G064500.1	DNAJ homologue 2	KOG0712	Molecular chaperone (DnaJ superfamily)	O	K09503	Mitochondrial biogenesis ;Chaperones and folding catalysts ;Protein processing in endoplasmic reticulum	GO:0051082,GO:0031072	unfolded protein binding;heat shock protein binding
c40006/f11p10/1545	1545	145.815	Sobic.004G247000.1	glutamine synthase clone R1	N/A	N/A	N/A	K01915	Glyoxylate and dicarboxylate metabolism ;Nitrogen metabolism ;Alanine;Arginine biosynthesis ;Two-component system ;Exosome ;Necroptosis ;Glutamatergic synapse ;GABAergic synapse	GO:0006807,GO:0006542,GO:0004356	nitrogen compound metabolic process;glutamine biosynthetic process;glutamate-ammonia ligase activity
c13310/f3p21/1107	1107	145.773	Sobic.002G352100.1	photosystem I light harvesting complex gene 2	N/A	N/A	N/A	K08908	Photosynthesis - antenna proteins ;Photosynthesis proteins	GO:0016020,GO:0009765	membrane;photosynthesis, light harvesting
c30965/f1p5/1064	1064	145.357	Sobic.003G130800.1	Pyruvate kinase family protein	N/A	N/A	N/A	K00873	Glycolysis / Gluconeogenesis ;Pyruvate metabolism ;Purine metabolism ;Membrane trafficking ;Exosome ;Glucagon signaling pathway ;Central carbon metabolism in cancer ;Viral carcinogenesis ;Type II diabetes mellitus ;Human papillomavirus infection	GO:0030955,GO:0006096,GO:0004743,GO:0000287	potassium ion binding;glycolytic process;pyruvate kinase activity;magnesium ion binding
c37857/f1p10/1043	1042	144.982	Sobic.003G403700.1	polyubiquitin 10	KOG0005,KOG0001	Ubiquitin-like protein;Ubiquitin-like protein;Ubiquitin and ubiquitin-like proteins;Ubiquitin and ubiquitin-like proteins	O;D;O;R	K08770,K04551	Ubiquitin system ;PPAR signaling pathway ;Ubiquitin system ;Endocytosis ;Exosome ;Mitophagy - animal ;Parkinson's disease ;Kaposi's sarcoma-associated herpesvirus infection	N/A	N/A
c27810/f1p18/1527	1528	144.975	Sobic.004G238500.1	Pyridine nucleotide-disulphide oxidoreductase family protein	N/A	N/A	N/A	K10960	Porphyrin and chlorophyll metabolism ;Terpenoid backbone biosynthesis	GO:0071949	FAD binding
c34219/f2p5/1299	1299	144.841	Sobic.004G202200.1	RAB GTPase homolog E1B	N/A	N/A	N/A	K02358	Mitochondrial biogenesis ;Translation factors ;Exosome	GO:0005525	GTP binding
c32579/f1p19/1826	1826	144.69	Sobic.003G234200.6	beta carbonic anhydrase 4	KOG1578	Predicted carbonic anhydrase involved in protection against oxidative damage	P	K01673	Nitrogen metabolism	GO:0008270,GO:0004089	zinc ion binding;carbonate dehydratase activity
c12922/f3p0/635	635	144.404	Sobic.003G313000.1	photosystem II reaction center W	N/A	N/A	N/A	K02721	Photosynthesis ;Photosynthesis proteins	GO:0015979,GO:0009523,GO:0009507	photosynthesis;photosystem II;chloroplast
c40475/f2p4/1503	1503	143.859	Sobic.010G160700.1	phosphoenolpyruvate carboxylase 2	N/A	N/A	N/A	K01595	Pyruvate metabolism ;Carbon fixation in photosynthetic organisms ;Carbon fixation pathways in prokaryotes ;Methane metabolism	GO:0015977,GO:0008964,GO:0006099	carbon fixation;phosphoenolpyruvate carboxylase activity;tricarboxylic acid cycle
c21286/f1p2/1090	1092	143.562	Sobic.005G042000.1	ribulose bisphosphate carboxylase small chain 1A	N/A	N/A	N/A	K01602	Glyoxylate and dicarboxylate metabolism ;Carbon fixation in photosynthetic organisms	N/A	N/A
c22901/f1p1/504	504	143.017	Sobic.001G371900.2	copper/zinc superoxide dismutase 1	KOG0441	Cu2+/Zn2+ superoxide dismutase SOD1	P	K04565	Peroxisome ;Longevity regulating pathway - multiple species ;Amyotrophic lateral sclerosis (ALS) ;Huntington's disease ;Prion diseases	GO:0055114,GO:0046872,GO:0006801	oxidation-reduction process;metal ion binding;superoxide metabolic process
c13659/f4p8/1125	1125	142.761	Sobic.002G030200.1	photosystem II subunit P-1	N/A	N/A	N/A	K02717	Photosynthesis ;Photosynthesis proteins	GO:0019898,GO:0015979,GO:0009654,GO:0009523,GO:0005509	extrinsic component of membrane;photosynthesis;photosystem II oxygen evolving complex;photosystem II;calcium ion binding
c20213/f1p4/1401	1401	142.607	Sobic.007G025400.1	glyceraldehyde-3-phosphate dehydrogenase C subunit 1	KOG0657	Glyceraldehyde 3-phosphate dehydrogenase	G	K00134	Glycolysis / Gluconeogenesis ;Carbon fixation in photosynthetic organisms ;Membrane trafficking ;HIF-1 signaling pathway ;Exosome ;Alzheimer's disease	GO:0055114,GO:0016620	oxidation-reduction process;oxidoreductase activity, acting on the aldehyde or oxo group of donors, NAD or NADP as acceptor
c34565/f2p2/852	852	142.416	Sobic.003G378600.1	oxidoreductases, acting on NADH or NADPH, quinone or similar compound as acceptor	N/A	N/A	N/A	N/A	N/A	GO:0055114,GO:0016655,GO:0016020	oxidation-reduction process;oxidoreductase activity, acting on NAD(P)H, quinone or similar compound as acceptor;membrane
c39830/f71p47/1383	1383	142.372	N/A	N/A	N/A	N/A	N/A	N/A	N/A	N/A	N/A
c13314/f2p1/873	874	142.27	Sobic.009G225600.1	2Fe-2S ferredoxin-like superfamily protein	N/A	N/A	N/A	N/A	N/A	GO:0051536,GO:0009055	iron-sulfur cluster binding;electron carrier activity
c39783/f4p11/1099	1099	142.235	Sobic.007G034300.1	N/A	N/A	N/A	N/A	N/A	N/A	N/A	N/A
c15156/f1p1/1174	1174	141.921	Sobic.004G247000.4	glutamine synthase clone R1	N/A	N/A	N/A	K01915	Glyoxylate and dicarboxylate metabolism ;Nitrogen metabolism ;Alanine;Arginine biosynthesis ;Two-component system ;Exosome ;Necroptosis ;Glutamatergic synapse ;GABAergic synapse	GO:0006807,GO:0006542,GO:0004356	nitrogen compound metabolic process;glutamine biosynthetic process;glutamate-ammonia ligase activity
c2222/f3p16/1398	1398	141.867	Sobic.001G519800.1	glyceraldehyde-3-phosphate dehydrogenase B subunit	KOG0657	Glyceraldehyde 3-phosphate dehydrogenase	G	K05298	Carbon fixation in photosynthetic organisms	GO:0055114,GO:0016620	oxidation-reduction process;oxidoreductase activity, acting on the aldehyde or oxo group of donors, NAD or NADP as acceptor
c37898/f1p0/620	616	141.778	Sobic.001G510800.1	Ribosomal protein L14p/L23e family protein	KOG0901	60S ribosomal protein L14/L17/L23	J	K02894	Ribosome ;Ribosome	GO:0006412,GO:0005840,GO:0003735	translation;ribosome;structural constituent of ribosome
c24334/f29p51/1419	1419	141.748	Sobic.001G219300.1	Lactate/malate dehydrogenase family protein	N/A	N/A	N/A	K00025	Citrate cycle (TCA cycle) ;Pyruvate metabolism ;Glyoxylate and dicarboxylate metabolism ;Carbon fixation in photosynthetic organisms ;Cysteine and methionine metabolism ;Proximal tubule bicarbonate reclamation	GO:0055114,GO:0016491,GO:0016616,GO:0016615,GO:0006108	oxidation-reduction process;oxidoreductase activity;oxidoreductase activity, acting on the CH-OH group of donors, NAD or NADP as acceptor;malate dehydrogenase activity;malate metabolic process
c1087/f8p4/1306	1306	141.679	Sobic.001G422100.1	Haloacid dehalogenase-like hydrolase (HAD) superfamily protein	KOG3109	Haloacid dehalogenase-like hydrolase	R	K07025	General function prediction only	N/A	N/A
c635/f14p13/1559	1560	141.649	Sobic.007G213700.1	alanine:glyoxylate aminotransferase	KOG2862	Alanine-glyoxylate aminotransferase AGT1	R	K00830	Glyoxylate and dicarboxylate metabolism ;Methane metabolism ;Alanine;Glycine;Amino acid related enzymes ;Peroxisome	GO:0030170,GO:0009058	pyridoxal phosphate binding;biosynthetic process
c2714/f5p7/919	919	141.208	Sobic.003G437800.1	N/A	N/A	N/A	N/A	N/A	N/A	GO:0006950	response to stress
c145/f25p31/1155	1155	140.636	Sobic.008G033200.2	Aluminium induced protein with YGL and LRDR motifs	N/A	N/A	N/A	N/A	N/A	N/A	N/A
c20046/f1p7/1198	1198	140.331	Sobic.009G137200.1	Single-stranded nucleic acid binding R3H protein	KOG2953	mRNA-binding protein Encore	A	N/A	N/A	GO:0003676	nucleic acid binding
c32285/f1p10/1805	1805	140.243	Sobic.004G211900.1	Adenosylmethionine decarboxylase family protein	KOG0788	S-adenosylmethionine decarboxylase	T	K01611	Cysteine and methionine metabolism ;Arginine and proline metabolism	GO:0008295,GO:0006597,GO:0004014	spermidine biosynthetic process;spermine biosynthetic process;adenosylmethionine decarboxylase activity
c40244/f2p2/1327	1327	139.79	Sobic.010G160700.1	phosphoenolpyruvate carboxylase 2	N/A	N/A	N/A	K01595	Pyruvate metabolism ;Carbon fixation in photosynthetic organisms ;Carbon fixation pathways in prokaryotes ;Methane metabolism	GO:0015977,GO:0008964,GO:0006099	carbon fixation;phosphoenolpyruvate carboxylase activity;tricarboxylic acid cycle
c40320/f12p22/1021	1020	139.656	Sobic.007G034300.1	N/A	N/A	N/A	N/A	N/A	N/A	N/A	N/A
c33900/f3p1/792	792	139.213	Sobic.003G243600.1	ubiquitin conjugating enzyme 9	KOG0417	Ubiquitin-protein ligase	O	K06689	Protein processing in endoplasmic reticulum ;Ubiquitin mediated proteolysis ;Ubiquitin system ;MAPK signaling pathway - fly ;Toll and Imd signaling pathway	N/A	N/A
c31785/f2p11/1252	1252	138.936	Sobic.002G339600.1	GTP binding Elongation factor Tu family protein	N/A	N/A	N/A	K03231	Transfer RNA biogenesis ;RNA transport ;Messenger RNA Biogenesis ;Translation factors ;Membrane trafficking ;Exosome ;Legionellosis	GO:0005525	GTP binding
c18908/f1p0/730	730	138.856	Sobic.007G161500.1	proton gradient regulation 5	N/A	N/A	N/A	N/A	N/A	N/A	N/A
c40336/f7p20/1430	1430	138.824	Sobic.003G226500.1	phosphatase-related	KOG1309	Suppressor of G2 allele of skp1	T	K12795	NOD-like receptor signaling pathway ;Plant-pathogen interaction	N/A	N/A
c9702/f3p45/1298	1298	138.732	Sobic.010G232100.3	polyubiquitin 10	KOG0005,KOG0001	Ubiquitin-like protein;Ubiquitin-like protein;Ubiquitin and ubiquitin-like proteins;Ubiquitin and ubiquitin-like proteins	O;D;O;R	K08770,K04551	Ubiquitin system ;PPAR signaling pathway ;Ubiquitin system ;Endocytosis ;Exosome ;Mitophagy - animal ;Parkinson's disease ;Kaposi's sarcoma-associated herpesvirus infection	N/A	N/A
c4116/f1p55/1188	1189	138.345	Sobic.004G056900.1	photosystem I light harvesting complex gene 1	N/A	N/A	N/A	K08907	Photosynthesis - antenna proteins ;Photosynthesis proteins	GO:0016020,GO:0009765	membrane;photosynthesis, light harvesting
c23241/f1p1/1070	1070	138.165	Sobic.001G243200.1	RmlC-like cupins superfamily protein	KOG2107	Uncharacterized conserved protein, contains double-stranded beta-helix domain	S	K08967	Cysteine and methionine metabolism	GO:0055114,GO:0010309	oxidation-reduction process;acireductone dioxygenase [iron(II)-requiring] activity
c10059/f1p2/877	876	137.882	Sobic.005G111100.1	E3 ubiquitin ligase SCF complex subunit SKP1/ASK1 family protein	KOG1724	SCF ubiquitin ligase, Skp1 component	O	K03094	Protein processing in endoplasmic reticulum ;Ubiquitin mediated proteolysis ;Ubiquitin system ;Chromosome and associated proteins ;Wnt signaling pathway ;Hedgehog signaling pathway - fly ;TGF-beta signaling pathway ;Cell cycle ;Cell cycle - yeast ;Oocyte meiosis ;Circadian rhythm ;Pathways in cancer ;Herpes simplex infection	GO:0006511	ubiquitin-dependent protein catabolic process
c34083/f118p62/1204	1204	137.778	Sobic.003G370000.1	Chlorophyll A-B binding family protein	N/A	N/A	N/A	K03542	Photosynthesis ;Photosynthesis proteins	N/A	N/A
c25570/f1p0/919	919	137.664	Sobic.003G196800.1	Ribosomal protein L19e family protein	KOG1696	60s ribosomal protein L19	J	K02885	Ribosome ;Ribosome	GO:0006412,GO:0005840,GO:0005622,GO:0003735	translation;ribosome;intracellular;structural constituent of ribosome
c33887/f2p10/977	977	137.522	Sobic.002G277100.1	triosephosphate isomerase	KOG1643	Triosephosphate isomerase	G	K01803	Glycolysis / Gluconeogenesis ;Fructose and mannose metabolism ;Inositol phosphate metabolism ;Carbon fixation in photosynthetic organisms ;Exosome	GO:0008152,GO:0004807	metabolic process;triose-phosphate isomerase activity
c1498/f4p4/1187	1188	137.498	Sobic.007G071500.1	photosystem II subunit R	N/A	N/A	N/A	K03541	Photosynthesis ;Photosynthesis proteins	GO:0042651,GO:0015979,GO:0009654,GO:0009523	thylakoid membrane;photosynthesis;photosystem II oxygen evolving complex;photosystem II
c2555/f1p9/5036	5030	137.299	Sobic.008G136000.1	heat shock protein 70	N/A	N/A	N/A	K03283	Protein phosphatase and associated proteins ;Spliceosome ;Spliceosome ;Ribosome biogenesis ;Mitochondrial biogenesis ;Chaperones and folding catalysts ;Protein processing in endoplasmic reticulum ;Membrane trafficking ;Proteasome ;MAPK signaling pathway ;Cell adhesion molecules and their ligands ;Endocytosis ;Exosome ;Antigen processing and presentation ;Estrogen signaling pathway ;Longevity regu…	N/A	N/A
c27452/f1p1/2276	2276	137.091	Sobic.010G160700.1	phosphoenolpyruvate carboxylase 2	N/A	N/A	N/A	K01595	Pyruvate metabolism ;Carbon fixation in photosynthetic organisms ;Carbon fixation pathways in prokaryotes ;Methane metabolism	GO:0015977,GO:0008964,GO:0006099	carbon fixation;phosphoenolpyruvate carboxylase activity;tricarboxylic acid cycle
c22871/f1p7/1087	1087	136.604	Sobic.007G052400.3	rubredoxin family protein	N/A	N/A	N/A	N/A	N/A	N/A	N/A
c28664/f2p16/2107	2107	136.255	Sobic.001G420100.1	heat shock protein 70	N/A	N/A	N/A	K03283	Protein phosphatase and associated proteins ;Spliceosome ;Spliceosome ;Ribosome biogenesis ;Mitochondrial biogenesis ;Chaperones and folding catalysts ;Protein processing in endoplasmic reticulum ;Membrane trafficking ;Proteasome ;MAPK signaling pathway ;Cell adhesion molecules and their ligands ;Endocytosis ;Exosome ;Antigen processing and presentation ;Estrogen signaling pathway ;Longevity regu…	N/A	N/A
c5572/f1p5/1281	1281	136.092	Sobic.005G056400.1	fructose-bisphosphate aldolase 2	N/A	N/A	N/A	K01623	Glycolysis / Gluconeogenesis ;Pentose phosphate pathway ;Fructose and mannose metabolism ;Carbon fixation in photosynthetic organisms ;Methane metabolism ;Membrane trafficking ;Chromosome and associated proteins ;Exosome	GO:0006096,GO:0004332	glycolytic process;fructose-bisphosphate aldolase activity
c37020/f1p1/1114	1114	136.046	Sobic.002G420900.2	hydroxyproline-rich glycoprotein family protein	N/A	N/A	N/A	N/A	N/A	N/A	N/A
c8524/f1p0/1087	1087	135.925	Sobic.007G053300.1	Ribosomal protein S3 family protein	KOG3181	40S ribosomal protein S3	J	K02985	Ribosome ;Ribosome	GO:0003723	RNA binding
c33753/f1p3/953	953	135.772	Zm00008a040408_T01	photosystem I light harvesting complex gene 3	N/A	N/A	N/A	K08909	Photosynthesis - antenna proteins ;Photosynthesis proteins	GO:0016020,GO:0009765	membrane;photosynthesis, light harvesting
c37370/f1p0/863	862	135.673	Sobic.001G403500.1	Ribosomal protein S7e family protein	KOG3320	40S ribosomal protein S7	J	K02993	Ribosome ;Ribosome	GO:0006412,GO:0005840,GO:0005622,GO:0003735	translation;ribosome;intracellular;structural constituent of ribosome
c14428/f2p0/630	632	135.583	Sobic.007G004700.1	2Fe-2S ferredoxin-like superfamily protein	N/A	N/A	N/A	K02639	Photosynthesis ;Photosynthesis proteins	GO:0051536,GO:0009055	iron-sulfur cluster binding;electron carrier activity
c24369/f53p63/1450	1450	135.546	Sobic.008G094000.1	homolog of Medicago truncatula MTN3	KOG1623	Multitransmembrane protein	R	K15382	Transporters	N/A	N/A
c9157/f3p4/1081	1081	135.544	Sobic.009G143100.1	photosynthetic electron transfer C	KOG1671	Ubiquinol cytochrome c reductase, subunit RIP1	C	K02636	Photosynthesis ;Photosynthesis proteins	GO:0055114,GO:0051537,GO:0016491,GO:0042651,GO:0009496,GO:0016679	oxidation-reduction process;2 iron, 2 sulfur cluster binding;oxidoreductase activity;thylakoid membrane;plastoquinol--plastocyanin reductase activity;oxidoreductase activity, acting on diphenols and related substances as donors
c7023/f3p7/1777	1777	135.308	Sobic.008G064700.1	galactose-1-phosphate guanylyltransferase (GDP)s;GDP-D-glucose phosphorylases;quercetin 4\'-O-glucosyltransferases	KOG2720	Predicted hydrolase (HIT family)	R	K14190	Ascorbate and aldarate metabolism	GO:0080048	GDP-D-glucose phosphorylase activity
c320/f17p15/1403	1403	134.65	Sobic.007G025400.1	glyceraldehyde-3-phosphate dehydrogenase C subunit 1	KOG0657	Glyceraldehyde 3-phosphate dehydrogenase	G	K00134	Glycolysis / Gluconeogenesis ;Carbon fixation in photosynthetic organisms ;Membrane trafficking ;HIF-1 signaling pathway ;Exosome ;Alzheimer's disease	GO:0055114,GO:0016620	oxidation-reduction process;oxidoreductase activity, acting on the aldehyde or oxo group of donors, NAD or NADP as acceptor
c35616/f1p4/2314	2314	134.549	Sobic.003G350700.1	heat shock protein 70	N/A	N/A	N/A	K03283	Protein phosphatase and associated proteins ;Spliceosome ;Spliceosome ;Ribosome biogenesis ;Mitochondrial biogenesis ;Chaperones and folding catalysts ;Protein processing in endoplasmic reticulum ;Membrane trafficking ;Proteasome ;MAPK signaling pathway ;Cell adhesion molecules and their ligands ;Endocytosis ;Exosome ;Antigen processing and presentation ;Estrogen signaling pathway ;Longevity regu…	N/A	N/A
c32360/f1p0/983	982	134.542	GRMZM2G124644_T01	Chaperone DnaJ-domain superfamily protein	N/A	N/A	N/A	N/A	N/A	N/A	N/A
c37853/f1p1/984	984	134.302	Sobic.010G160700.1	phosphoenolpyruvate carboxylase 2	N/A	N/A	N/A	K01595	Pyruvate metabolism ;Carbon fixation in photosynthetic organisms ;Carbon fixation pathways in prokaryotes ;Methane metabolism	GO:0015977,GO:0008964,GO:0006099	carbon fixation;phosphoenolpyruvate carboxylase activity;tricarboxylic acid cycle
c23520/f3p4/1062	1059	134.084	Sobic.001G018900.1	Ribosomal protein S4 (RPS4A) family protein	KOG0378	40S ribosomal protein S4	J	K02987	Ribosome ;Ribosome	GO:0003723,GO:0006412,GO:0005840,GO:0005622,GO:0003735	RNA binding;translation;ribosome;intracellular;structural constituent of ribosome
c39781/f51p14/1608	1608	134.059	Sobic.002G047400.1	protein containing PDZ domain, a K-box domain, and a TPR region	N/A	N/A	N/A	N/A	N/A	N/A	N/A
c30499/f1p2/1038	1035	133.81	Sobic.004G303200.1	Cytochrome b561/ferric reductase transmembrane protein family	KOG1619	Cytochrome b	C	K08360	Transporters	GO:0016021	integral component of membrane
c21951/f1p0/1008	1012	133.569	Sobic.002G421300.2	hydroxyproline-rich glycoprotein family protein	N/A	N/A	N/A	N/A	N/A	N/A	N/A
c36433/f1p1/729	731	133.227	GRMZM2G335635_T01	N/A	N/A	N/A	N/A	N/A	N/A	N/A	N/A
c40025/f3p26/1241	1242	133.068	Sobic.006G264201.1	light harvesting complex photosystem II subunit 6	N/A	N/A	N/A	K08917	Photosynthesis - antenna proteins ;Photosynthesis proteins	GO:0016020,GO:0009765	membrane;photosynthesis, light harvesting
c16040/f1p1/832	831	132.778	Sobic.002G288300.1	photosystem II light harvesting complex gene B1B2	N/A	N/A	N/A	K08912	Photosynthesis - antenna proteins ;Photosynthesis proteins	GO:0016020,GO:0009765	membrane;photosynthesis, light harvesting
c16665/f1p1/448	448	132.744	Zm00008a007432_T01	photosystem I subunit O	N/A	N/A	N/A	K14332	Photosynthesis ;Photosynthesis proteins	N/A	N/A
c35136/f1p2/1243	1243	132.54	Zm00008a024797_T01	GTP binding Elongation factor Tu family protein	N/A	N/A	N/A	K03231	Transfer RNA biogenesis ;RNA transport ;Messenger RNA Biogenesis ;Translation factors ;Membrane trafficking ;Exosome ;Legionellosis	GO:0005525	GTP binding
c11729/f1p0/1451	1447	132.331	Sobic.002G306900.1	Nucleoside diphosphate kinase family protein	KOG0888	Nucleoside diphosphate kinase	F	K00940	Purine metabolism ;Pyrimidine metabolism ;Drug metabolism - other enzymes ;Membrane trafficking ;MAPK signaling pathway - plant	GO:0006241,GO:0006228,GO:0006183,GO:0006165,GO:0004550	CTP biosynthetic process;UTP biosynthetic process;GTP biosynthetic process;nucleoside diphosphate phosphorylation;nucleoside diphosphate kinase activity
c5686/f1p1/690	690	132.182	Sobic.007G161500.1	proton gradient regulation 5	N/A	N/A	N/A	N/A	N/A	N/A	N/A
c833/f14p11/1737	1737	131.646	Zm00008a014848_T01	rubisco activase	KOG0651	26S proteasome regulatory complex, ATPase RPT4	O	N/A	N/A	GO:0005524	ATP binding
c16987/f1p0/848	848	131.55	Sobic.006G081100.1	RNA binding Plectin/S10 domain-containing protein	KOG3344	40s ribosomal protein s10	J	K02947	Ribosome ;Ribosome	N/A	N/A
c25726/f1p0/1086	1088	131.444	Sobic.009G177700.1	ribosomal protein L24	KOG1722	60s ribosomal protein L24	J	K02896	Ribosome ;Ribosome	N/A	N/A
c1535/f2p11/1634	1634	131.356	Zm00008a038180_T01	conserved peptide upstream open reading frame 10	N/A	N/A	N/A	N/A	N/A	N/A	N/A
c35836/f1p2/1346	1359	131.067	GRMZM2G451295_T02	N/A	N/A	N/A	N/A	N/A	N/A	N/A	N/A
c18463/f1p3/1918	1919	131.026	Sobic.006G191500.2	Pentatricopeptide repeat (PPR-like) superfamily protein	N/A	N/A	N/A	N/A	N/A	N/A	N/A
c10488/f1p3/1189	1189	130.948	Sobic.003G332401.1	ADP-ribosylation factor A1E	KOG0070	GTP-binding ADP-ribosylation factor Arf1	U	K07937,K07977	Membrane trafficking ;Phospholipase D signaling pathway ;GTP-binding proteins ;Endocytosis ;Exosome ;Vibrio cholerae infection ;Legionellosis ;GTP-binding proteins	N/A	N/A
c39249/f2p14/1843	1843	130.872	Sobic.003G132100.1	dicarboxylate diiron protein, putative (Crd1)	N/A	N/A	N/A	K04035	Porphyrin and chlorophyll metabolism	GO:0055114,GO:0046872,GO:0016491	oxidation-reduction process;metal ion binding;oxidoreductase activity
c27389/f1p0/544	552	130.828	Sobic.009G163800.1	Ribosomal protein L36e family protein	KOG3452	60S ribosomal protein L36	J	K02920	Ribosome ;Ribosome	GO:0006412,GO:0005840,GO:0005622,GO:0003735	translation;ribosome;intracellular;structural constituent of ribosome
c47155/f1p1/2300	2300	130.826	Sobic.010G160700.1	phosphoenolpyruvate carboxylase 2	N/A	N/A	N/A	K01595	Pyruvate metabolism ;Carbon fixation in photosynthetic organisms ;Carbon fixation pathways in prokaryotes ;Methane metabolism	GO:0015977,GO:0008964,GO:0006099	carbon fixation;phosphoenolpyruvate carboxylase activity;tricarboxylic acid cycle
c18097/f1p7/1560	1561	130.76	Sobic.003G234200.6	beta carbonic anhydrase 4	KOG1578	Predicted carbonic anhydrase involved in protection against oxidative damage	P	K01673	Nitrogen metabolism	GO:0008270,GO:0004089	zinc ion binding;carbonate dehydratase activity
c3439/f1p0/980	980	130.754	Sobic.009G174900.1	ubiquitin-conjugating enzyme 11	KOG0417	Ubiquitin-protein ligase	O	K06689	Protein processing in endoplasmic reticulum ;Ubiquitin mediated proteolysis ;Ubiquitin system ;MAPK signaling pathway - fly ;Toll and Imd signaling pathway	GO:0005515	protein binding
c4251/f1p5/1396	1394	130.558	Sobic.006G108400.1	general regulatory factor 7	KOG0841	Multifunctional chaperone (14-3-3 family)	O	K06630	DNA repair and recombination proteins ;MAPK signaling pathway - yeast ;Hippo signaling pathway ;Hippo signaling pathway -fly ;PI3K-Akt signaling pathway ;Exosome ;Cell cycle ;Oocyte meiosis ;Neurotrophin signaling pathway ;Viral carcinogenesis ;Epstein-Barr virus infection	GO:0019904	protein domain specific binding
c10496/f99p29/1058	1059	130.526	Zm00008a015155_T01	light harvesting complex of photosystem II 5	N/A	N/A	N/A	K08916	Photosynthesis - antenna proteins ;Photosynthesis proteins	GO:0016020,GO:0009765	membrane;photosynthesis, light harvesting
c17512/f2p0/775	775	130.478	Sobic.002G119500.3	photosystem I subunit E-2	N/A	N/A	N/A	K02693	Photosynthesis ;Photosynthesis proteins	GO:0015979,GO:0009538,GO:0009522	photosynthesis;photosystem I reaction center;photosystem I
c3858/f2p18/1457	1458	130.243	Sobic.004G251500.1	calcium sensing receptor	N/A	N/A	N/A	N/A	N/A	N/A	N/A
c40180/f1p10/1259	1261	129.916	Sobic.001G426800.2	RNA-binding (RRM/RBD/RNP motifs) family protein	KOG0107,KOG4207	Alternative splicing factor SRp20/9G8 (RRM superfamily);Predicted splicing factor, SR protein superfamily	A;A	N/A	N/A	GO:0003676	nucleic acid binding
c39384/f4p10/1130	1130	129.439	Sobic.002G431100.1	ascorbate peroxidase 1	N/A	N/A	N/A	K00434	Ascorbate and aldarate metabolism ;Glutathione metabolism	GO:0055114,GO:0020037,GO:0006979,GO:0004601	oxidation-reduction process;heme binding;response to oxidative stress;peroxidase activity
c33956/f1p0/646	646	129.406	Sobic.003G437600.2	thioredoxin Y1	KOG0910	Thioredoxin-like protein	O	N/A	N/A	GO:0045454,GO:0015035,GO:0006662	cell redox homeostasis;protein disulfide oxidoreductase activity;glycerol ether metabolic process
c8481/f4p16/1317	1317	129.365	Sobic.010G262500.1	glyceraldehyde-3-phosphate dehydrogenase C subunit 1	KOG0657	Glyceraldehyde 3-phosphate dehydrogenase	G	K00134	Glycolysis / Gluconeogenesis ;Carbon fixation in photosynthetic organisms ;Membrane trafficking ;HIF-1 signaling pathway ;Exosome ;Alzheimer's disease	GO:0055114,GO:0016620	oxidation-reduction process;oxidoreductase activity, acting on the aldehyde or oxo group of donors, NAD or NADP as acceptor
c7829/f1p7/1076	1076	129.351	Sobic.002G030200.1	photosystem II subunit P-1	N/A	N/A	N/A	K02717	Photosynthesis ;Photosynthesis proteins	GO:0019898,GO:0015979,GO:0009654,GO:0009523,GO:0005509	extrinsic component of membrane;photosynthesis;photosystem II oxygen evolving complex;photosystem II;calcium ion binding
c832/f34p28/1253	1253	129.29	Sobic.010G232100.3	polyubiquitin 10	KOG0005,KOG0001	Ubiquitin-like protein;Ubiquitin-like protein;Ubiquitin and ubiquitin-like proteins;Ubiquitin and ubiquitin-like proteins	O;D;O;R	K08770,K04551	Ubiquitin system ;PPAR signaling pathway ;Ubiquitin system ;Endocytosis ;Exosome ;Mitophagy - animal ;Parkinson's disease ;Kaposi's sarcoma-associated herpesvirus infection	N/A	N/A
c1395/f3p1/936	936	129.285	Sobic.004G305800.3	N/A	N/A	N/A	N/A	N/A	N/A	N/A	N/A
c24252/f52p43/1319	1319	129.202	Sobic.010G262500.1	glyceraldehyde-3-phosphate dehydrogenase C subunit 1	KOG0657	Glyceraldehyde 3-phosphate dehydrogenase	G	K00134	Glycolysis / Gluconeogenesis ;Carbon fixation in photosynthetic organisms ;Membrane trafficking ;HIF-1 signaling pathway ;Exosome ;Alzheimer's disease	GO:0055114,GO:0016620	oxidation-reduction process;oxidoreductase activity, acting on the aldehyde or oxo group of donors, NAD or NADP as acceptor
c5834/f1p0/1029	1029	129.173	GRMZM2G085646_T01	photosystem I subunit F	N/A	N/A	N/A	K02694	Photosynthesis ;Photosynthesis proteins	GO:0015979,GO:0009538,GO:0009522	photosynthesis;photosystem I reaction center;photosystem I
c2733/f2p0/747	747	129.169	Sobic.002G330000.1	histone H2A 2	KOG1756	Histone 2A	B	K11251	Chromosome and associated proteins ;Exosome ;Necroptosis ;Systemic lupus erythematosus ;Alcoholism	GO:0003677	DNA binding
c42813/f1p0/813	813	129.054	GRMZM2G101859_T01	Nucleic acid-binding, OB-fold-like protein	KOG3403	Translation initiation factor 1A (eIF-1A)	J	K03236	RNA transport ;Translation factors	GO:0006413,GO:0003743,GO:0003723	translational initiation;translation initiation factor activity;RNA binding
c12965/f1p3/1530	1531	128.979	Sobic.001G180200.1	Peroxisomal membrane 22 kDa (Mpv17/PMP22) family protein	KOG1944	Peroxisomal membrane protein MPV17 and related proteins	R	K13348	Peroxisome	GO:0016021	integral component of membrane
c11912/f2p1/1236	1238	128.51	Sobic.001G111700.1	alpha/beta-Hydrolases superfamily protein	KOG1455	Lysophospholipase	I	N/A	N/A	N/A	N/A
c8298/f1p13/1745	1745	128.404	Sobic.002G339600.1	GTP binding Elongation factor Tu family protein	N/A	N/A	N/A	K03231	Transfer RNA biogenesis ;RNA transport ;Messenger RNA Biogenesis ;Translation factors ;Membrane trafficking ;Exosome ;Legionellosis	GO:0005525	GTP binding
c24894/f1p2/905	905	128.069	Sobic.007G034300.1	N/A	N/A	N/A	N/A	N/A	N/A	N/A	N/A
c39556/f1p2/2095	2095	127.73	GRMZM2G155242_T01	myo-inositol-1-phosphate synthase 2	N/A	N/A	N/A	K01858	Inositol phosphate metabolism ;Streptomycin biosynthesis	GO:0008654,GO:0006021,GO:0004512	phospholipid biosynthetic process;inositol biosynthetic process;inositol-3-phosphate synthase activity
c6852/f1p1/606	606	127.516	Sobic.001G091801.1	ribosomal protein S27	KOG1779	40s ribosomal protein S27	J	K02978	Ribosome ;Ribosome	GO:0006412,GO:0005840,GO:0005622,GO:0003735	translation;ribosome;intracellular;structural constituent of ribosome
c3200/f1p0/1366	1364	127.303	Sobic.003G105700.1	hydroxyproline-rich glycoprotein family protein	N/A	N/A	N/A	N/A	N/A	N/A	N/A
c40284/f1p2/1397	1396	127.184	Sobic.006G105900.6	glyceraldehyde 3-phosphate dehydrogenase A subunit 2	KOG0657	Glyceraldehyde 3-phosphate dehydrogenase	G	K05298	Carbon fixation in photosynthetic organisms	GO:0055114,GO:0016620	oxidation-reduction process;oxidoreductase activity, acting on the aldehyde or oxo group of donors, NAD or NADP as acceptor
c14372/f149p79/2408	2409	127.055	Sobic.007G216300.1	HEAT SHOCK PROTEIN 81.4	N/A	N/A	N/A	K04079	Protein phosphatase and associated proteins ;Mitochondrial biogenesis ;Chaperones and folding catalysts ;Protein processing in endoplasmic reticulum ;Membrane trafficking ;Proteasome ;PI3K-Akt signaling pathway ;Exosome ;Necroptosis ;NOD-like receptor signaling pathway ;Antigen processing and presentation ;Th17 cell differentiation ;IL-17 signaling pathway ;Estrogen signaling pathway ;Progesteron…	GO:0051082,GO:0006950,GO:0006457,GO:0005524	unfolded protein binding;response to stress;protein folding;ATP binding
c28357/f1p1/976	976	126.759	Zm00008a021335_T01	lipoxygenase 2	N/A	N/A	N/A	K00454	Linoleic acid metabolism ;alpha-Linolenic acid metabolism	GO:0005515,GO:0055114,GO:0046872,GO:0016702	protein binding;oxidation-reduction process;metal ion binding;oxidoreductase activity, acting on single donors with incorporation of molecular oxygen, incorporation of two atoms of oxygen
c21460/f1p1/1290	1290	126.756	Sobic.009G023200.1	N/A	N/A	N/A	N/A	N/A	N/A	N/A	N/A
c39104/f1p12/1163	1163	126.593	Sobic.007G025400.4	glyceraldehyde-3-phosphate dehydrogenase C subunit 1	KOG0657	Glyceraldehyde 3-phosphate dehydrogenase	G	N/A	N/A	GO:0055114,GO:0016620	oxidation-reduction process;oxidoreductase activity, acting on the aldehyde or oxo group of donors, NAD or NADP as acceptor
c31583/f1p7/1250	1250	126.441	Sobic.010G190600.4	A20/AN1-like zinc finger family protein	KOG3173	Predicted Zn-finger protein	R	N/A	N/A	GO:0008270,GO:0003677	zinc ion binding;DNA binding
c5106/f2p4/1214	1214	126.24	GRMZM2G337113_T02	glyceraldehyde 3-phosphate dehydrogenase A subunit 2	KOG0657	Glyceraldehyde 3-phosphate dehydrogenase	G	K05298	Carbon fixation in photosynthetic organisms	GO:0055114,GO:0016620	oxidation-reduction process;oxidoreductase activity, acting on the aldehyde or oxo group of donors, NAD or NADP as acceptor
c29197/f3p3/935	932	125.724	Sobic.003G305700.1	Glutathione S-transferase family protein	KOG0867	Glutathione S-transferase	O	K00799	Glutathione metabolism ;Metabolism of xenobiotics by cytochrome P450 ;Drug metabolism - cytochrome P450 ;Transporters ;Pathways in cancer ;Chemical carcinogenesis ;Hepatocellular carcinoma ;Fluid shear stress and atherosclerosis ;Platinum drug resistance	GO:0005515	protein binding
c25007/f1p2/861	860	125.672	Sobic.002G324200.1	Translation initiation factor SUI1 family protein	KOG1770	Translation initiation factor 1 (eIF-1/SUI1)	J	K03113	RNA transport ;Translation factors	GO:0006413,GO:0003743	translational initiation;translation initiation factor activity
c19374/f1p0/621	619	124.88	Sobic.005G032300.1	Ubiquitin-like superfamily protein	KOG3493	Ubiquitin-like protein	O	K13113	Spliceosome ;Longevity regulating pathway - worm	GO:0005515	protein binding
c10803/f1p2/740	739	124.871	Sobic.002G211000.1	Protein of unknown function (DUF581)	N/A	N/A	N/A	N/A	N/A	N/A	N/A
c8706/f2p0/1166	1166	124.593	Sobic.001G180200.1	Peroxisomal membrane 22 kDa (Mpv17/PMP22) family protein	KOG1944	Peroxisomal membrane protein MPV17 and related proteins	R	K13348	Peroxisome	GO:0016021	integral component of membrane
c40088/f2p1/1358	1358	124.512	Sobic.001G517700.1	catalase 2	N/A	N/A	N/A	K03781	Glyoxylate and dicarboxylate metabolism ;Tryptophan metabolism ;MAPK signaling pathway - plant ;MAPK signaling pathway - yeast ;FoxO signaling pathway ;Peroxisome ;Longevity regulating pathway - mammal ;Longevity regulating pathway - worm ;Longevity regulating pathway - multiple species ;Amyotrophic lateral sclerosis (ALS)	GO:0055114,GO:0020037,GO:0004096,GO:0006979	oxidation-reduction process;heme binding;catalase activity;response to oxidative stress
c46737/f1p2/2821	2821	124.46	Sobic.010G160700.1	phosphoenolpyruvate carboxylase 2	N/A	N/A	N/A	K01595	Pyruvate metabolism ;Carbon fixation in photosynthetic organisms ;Carbon fixation pathways in prokaryotes ;Methane metabolism	GO:0015977,GO:0008964,GO:0006099	carbon fixation;phosphoenolpyruvate carboxylase activity;tricarboxylic acid cycle
c16982/f1p0/573	573	124.415	N/A	N/A	N/A	N/A	N/A	N/A	N/A	N/A	N/A
c16108/f3p1/812	814	124.228	Sobic.001G034700.1	actin depolymerizing factor 4	KOG1735	Actin depolymerizing factor	Z	K05765	Membrane trafficking ;Exosome ;Regulation of actin cytoskeleton ;Cytoskeleton proteins ;Fc gamma R-mediated phagocytosis ;Axon guidance ;Pertussis	GO:0005622,GO:0003779,GO:0030042,GO:0015629	intracellular;actin binding;actin filament depolymerization;actin cytoskeleton
c28600/f1p3/848	848	124.202	Sobic.008G053200.1	fructose-bisphosphate aldolase 2	N/A	N/A	N/A	K01623	Glycolysis / Gluconeogenesis ;Pentose phosphate pathway ;Fructose and mannose metabolism ;Carbon fixation in photosynthetic organisms ;Methane metabolism ;Membrane trafficking ;Chromosome and associated proteins ;Exosome	GO:0006096,GO:0004332	glycolytic process;fructose-bisphosphate aldolase activity
c37002/f1p4/3354	3354	124.163	Sobic.010G160700.1	phosphoenolpyruvate carboxylase 2	N/A	N/A	N/A	K01595	Pyruvate metabolism ;Carbon fixation in photosynthetic organisms ;Carbon fixation pathways in prokaryotes ;Methane metabolism	GO:0015977,GO:0008964,GO:0006099	carbon fixation;phosphoenolpyruvate carboxylase activity;tricarboxylic acid cycle
c12506/f2p2/894	894	123.917	Sobic.001G040800.1	ADP-ribosylation factor A1F	KOG0070	GTP-binding ADP-ribosylation factor Arf1	U	K07937,K07977	Membrane trafficking ;Phospholipase D signaling pathway ;GTP-binding proteins ;Endocytosis ;Exosome ;Vibrio cholerae infection ;Legionellosis ;GTP-binding proteins	N/A	N/A
c677/f1p0/2259	2256	123.781	Sobic.010G160700.1	phosphoenolpyruvate carboxylase 2	N/A	N/A	N/A	K01595	Pyruvate metabolism ;Carbon fixation in photosynthetic organisms ;Carbon fixation pathways in prokaryotes ;Methane metabolism	GO:0015977,GO:0008964,GO:0006099	carbon fixation;phosphoenolpyruvate carboxylase activity;tricarboxylic acid cycle
c39031/f1p1/1056	1057	123.665	Sobic.010G160700.1	phosphoenolpyruvate carboxylase 2	N/A	N/A	N/A	K01595	Pyruvate metabolism ;Carbon fixation in photosynthetic organisms ;Carbon fixation pathways in prokaryotes ;Methane metabolism	GO:0015977,GO:0008964,GO:0006099	carbon fixation;phosphoenolpyruvate carboxylase activity;tricarboxylic acid cycle
c5360/f4p3/825	826	123.405	Sobic.010G109500.1	N/A	N/A	N/A	N/A	N/A	N/A	N/A	N/A
c30575/f1p2/801	799	123.312	Sobic.008G063100.1	thioredoxin M-type 4	KOG0907	Thioredoxin	O	K03671	Chaperones and folding catalysts ;NOD-like receptor signaling pathway ;Fluid shear stress and atherosclerosis	GO:0045454,GO:0015035,GO:0006662	cell redox homeostasis;protein disulfide oxidoreductase activity;glycerol ether metabolic process
c23112/f1p0/749	749	123.269	Sobic.004G072000.1	Ribosomal protein S21 family protein	N/A	N/A	N/A	N/A	N/A	GO:0006412,GO:0005840,GO:0003735	translation;ribosome;structural constituent of ribosome
c5753/f1p19/1001	1001	123.134	Sobic.002G288300.1	photosystem II light harvesting complex gene B1B2	N/A	N/A	N/A	K08912	Photosynthesis - antenna proteins ;Photosynthesis proteins	GO:0016020,GO:0009765	membrane;photosynthesis, light harvesting
c13978/f3p0/834	834	123.124	Sobic.006G101500.2	NDH dependent flow 6	N/A	N/A	N/A	N/A	N/A	N/A	N/A
c14123/f2p16/1688	1688	123.08	Sobic.008G053200.1	fructose-bisphosphate aldolase 2	N/A	N/A	N/A	K01623	Glycolysis / Gluconeogenesis ;Pentose phosphate pathway ;Fructose and mannose metabolism ;Carbon fixation in photosynthetic organisms ;Methane metabolism ;Membrane trafficking ;Chromosome and associated proteins ;Exosome	GO:0006096,GO:0004332	glycolytic process;fructose-bisphosphate aldolase activity
c14048/f1p5/1193	1193	123.008	Sobic.003G132100.1	dicarboxylate diiron protein, putative (Crd1)	N/A	N/A	N/A	K04035	Porphyrin and chlorophyll metabolism	GO:0055114,GO:0046872,GO:0016491	oxidation-reduction process;metal ion binding;oxidoreductase activity
c17593/f1p0/656	656	122.947	Sobic.006G264201.1	light harvesting complex photosystem II subunit 6	N/A	N/A	N/A	K08917	Photosynthesis - antenna proteins ;Photosynthesis proteins	GO:0016020,GO:0009765	membrane;photosynthesis, light harvesting
c9726/f2p2/1087	1088	122.524	Sobic.008G066100.1	chloroplast RNA binding	KOG1430,KOG1371	C-3 sterol dehydrogenase/3-beta-hydroxysteroid dehydrogenase and related dehydrogenases;C-3 sterol dehydrogenase/3-beta-hydroxysteroid dehydrogenase and related dehydrogenases;UDP-glucose 4-epimerase/UDP-sulfoquinovose synthase	E;I;M	N/A	N/A	GO:0050662,GO:0003824	coenzyme binding;catalytic activity
c602/f8p15/1463	1460	122.188	Sobic.007G025400.1	glyceraldehyde-3-phosphate dehydrogenase C subunit 1	KOG0657	Glyceraldehyde 3-phosphate dehydrogenase	G	K00134	Glycolysis / Gluconeogenesis ;Carbon fixation in photosynthetic organisms ;Membrane trafficking ;HIF-1 signaling pathway ;Exosome ;Alzheimer's disease	GO:0055114,GO:0016620	oxidation-reduction process;oxidoreductase activity, acting on the aldehyde or oxo group of donors, NAD or NADP as acceptor
c31377/f2p2/2023	2026	121.864	Sobic.008G064700.1	galactose-1-phosphate guanylyltransferase (GDP)s;GDP-D-glucose phosphorylases;quercetin 4\'-O-glucosyltransferases	KOG2720	Predicted hydrolase (HIT family)	R	K14190	Ascorbate and aldarate metabolism	GO:0080048	GDP-D-glucose phosphorylase activity
c30092/f1p19/2394	2395	121.661	Sobic.007G216300.1	HEAT SHOCK PROTEIN 81.4	N/A	N/A	N/A	K04079	Protein phosphatase and associated proteins ;Mitochondrial biogenesis ;Chaperones and folding catalysts ;Protein processing in endoplasmic reticulum ;Membrane trafficking ;Proteasome ;PI3K-Akt signaling pathway ;Exosome ;Necroptosis ;NOD-like receptor signaling pathway ;Antigen processing and presentation ;Th17 cell differentiation ;IL-17 signaling pathway ;Estrogen signaling pathway ;Progesteron…	GO:0051082,GO:0006950,GO:0006457,GO:0005524	unfolded protein binding;response to stress;protein folding;ATP binding
c15231/f1p2/1027	1027	121.386	Sobic.003G260600.1	ATP synthase alpha/beta family protein	N/A	N/A	N/A	K02133	Oxidative phosphorylation ;Alzheimer's disease ;Parkinson's disease ;Huntington's disease	GO:0016887,GO:0006754,GO:0005524,GO:0000275,GO:0046034,GO:0015992,GO:0033178,GO:0016820,GO:0015991	ATPase activity;ATP biosynthetic process;ATP binding;mitochondrial proton-transporting ATP synthase complex, catalytic core F(1);ATP metabolic process;proton transport;proton-transporting two-sector ATPase complex, catalytic domain;hydrolase activity, acting on acid anhydrides, catalyzing transmembrane movement of substances;ATP hydrolysis coupled proton transport
c36714/f1p2/2558	2558	121.038	Sobic.010G160700.1	phosphoenolpyruvate carboxylase 2	N/A	N/A	N/A	K01595	Pyruvate metabolism ;Carbon fixation in photosynthetic organisms ;Carbon fixation pathways in prokaryotes ;Methane metabolism	GO:0015977,GO:0008964,GO:0006099	carbon fixation;phosphoenolpyruvate carboxylase activity;tricarboxylic acid cycle
c15870/f1p0/878	877	121.027	Sobic.009G043000.1	thioredoxin F2	KOG0907	Thioredoxin	O	N/A	N/A	GO:0045454,GO:0015035,GO:0006662	cell redox homeostasis;protein disulfide oxidoreductase activity;glycerol ether metabolic process
c39155/f1p3/1197	1197	120.978	N/A	N/A	N/A	N/A	N/A	N/A	N/A	N/A	N/A
c10395/f1p0/985	985	120.971	Sobic.002G030200.1	photosystem II subunit P-1	N/A	N/A	N/A	K02717	Photosynthesis ;Photosynthesis proteins	GO:0019898,GO:0015979,GO:0009654,GO:0009523,GO:0005509	extrinsic component of membrane;photosynthesis;photosystem II oxygen evolving complex;photosystem II;calcium ion binding
c34283/f1p13/1964	1964	120.911	Sobic.010G160700.1	phosphoenolpyruvate carboxylase 2	N/A	N/A	N/A	K01595	Pyruvate metabolism ;Carbon fixation in photosynthetic organisms ;Carbon fixation pathways in prokaryotes ;Methane metabolism	GO:0015977,GO:0008964,GO:0006099	carbon fixation;phosphoenolpyruvate carboxylase activity;tricarboxylic acid cycle
c14200/f6p3/856	856	120.806	Sobic.008G049200.2	N/A	N/A	N/A	N/A	N/A	N/A	GO:0006950	response to stress
c243/f29p54/1477	1477	120.649	Sobic.010G232100.1	polyubiquitin 10	KOG0001	Ubiquitin and ubiquitin-like proteins;Ubiquitin and ubiquitin-like proteins	O;R	K08770	Ubiquitin system ;PPAR signaling pathway	N/A	N/A
c24121/f37p19/1191	1192	120.559	Sobic.004G288700.1	plasma membrane intrinsic protein 1;4	KOG0223	Aquaporin (major intrinsic protein family)	G	K09872	Transporters	GO:0016020,GO:0006810,GO:0005215	membrane;transport;transporter activity
c15827/f1p1/967	966	120.299	Sobic.010G073700.1	chaperonin 20	KOG1641	Mitochondrial chaperonin	O	K04078	Mitochondrial biogenesis ;Chaperones and folding catalysts	GO:0006457,GO:0005737	protein folding;cytoplasm
c46168/f1p1/2083	2085	119.983	Sobic.010G160700.1	phosphoenolpyruvate carboxylase 2	N/A	N/A	N/A	K01595	Pyruvate metabolism ;Carbon fixation in photosynthetic organisms ;Carbon fixation pathways in prokaryotes ;Methane metabolism	GO:0015977,GO:0008964,GO:0006099	carbon fixation;phosphoenolpyruvate carboxylase activity;tricarboxylic acid cycle
c2119/f2p4/1123	1123	119.867	Sobic.004G040900.1	Translation initiation factor IF2/IF5	KOG2767	Translation initiation factor 5 (eIF-5)	J	K03262	RNA transport ;Translation factors ;Apoptosis - fly	GO:0005515,GO:0006413,GO:0003743	protein binding;translational initiation;translation initiation factor activity
c38148/f1p6/1913	1913	119.55	Pavir.Ga01281.1	Adenosylmethionine decarboxylase family protein	KOG0788	S-adenosylmethionine decarboxylase	T	K01611	Cysteine and methionine metabolism ;Arginine and proline metabolism	GO:0008295,GO:0006597,GO:0004014	spermidine biosynthetic process;spermine biosynthetic process;adenosylmethionine decarboxylase activity
c34247/f22p19/1484	1484	119.381	Sobic.004G050000.1	polyubiquitin 10	KOG0001	Ubiquitin and ubiquitin-like proteins;Ubiquitin and ubiquitin-like proteins	O;R	K08770	Ubiquitin system ;PPAR signaling pathway	N/A	N/A
c13940/f2p1/1142	1142	119.124	Sobic.004G329300.1	Cytosol aminopeptidase family protein	KOG2597	Predicted aminopeptidase of the M17 family	R	K01255	Glutathione metabolism ;Peptidases	GO:0006508,GO:0005622,GO:0004177	proteolysis;intracellular;aminopeptidase activity
c38421/f1p1/1388	1389	118.782	Sobic.002G306800.1	FAD/NAD(P)-binding oxidoreductase family protein	KOG2614	Kynurenine 3-monooxygenase and related flavoprotein monooxygenases;Kynurenine 3-monooxygenase and related flavoprotein monooxygenases	C;R	N/A	N/A	GO:0071949	FAD binding
c39624/f18p11/1208	1209	118.732	Sobic.006G105900.5	glyceraldehyde 3-phosphate dehydrogenase A subunit 2	KOG0657	Glyceraldehyde 3-phosphate dehydrogenase	G	N/A	N/A	GO:0055114,GO:0016620	oxidation-reduction process;oxidoreductase activity, acting on the aldehyde or oxo group of donors, NAD or NADP as acceptor
c12288/f2p0/941	941	118.591	Sobic.009G163900.1	heat shock protein 70	N/A	N/A	N/A	K03283	Protein phosphatase and associated proteins ;Spliceosome ;Spliceosome ;Ribosome biogenesis ;Mitochondrial biogenesis ;Chaperones and folding catalysts ;Protein processing in endoplasmic reticulum ;Membrane trafficking ;Proteasome ;MAPK signaling pathway ;Cell adhesion molecules and their ligands ;Endocytosis ;Exosome ;Antigen processing and presentation ;Estrogen signaling pathway ;Longevity regu…	N/A	N/A
c382/f17p97/1338	1338	118.432	Sobic.010G241000.1	photosystem II subunit O-2	N/A	N/A	N/A	K02716	Photosynthesis ;Photosynthesis proteins	GO:0042549,GO:0019898,GO:0015979,GO:0009654,GO:0009523,GO:0005509	photosystem II stabilization;extrinsic component of membrane;photosynthesis;photosystem II oxygen evolving complex;photosystem II;calcium ion binding
c37181/f1p1/755	756	118.424	GRMZM2G335635_T01	N/A	N/A	N/A	N/A	N/A	N/A	N/A	N/A
c12030/f1p15/1039	1041	118.352	Sobic.003G370000.1	Chlorophyll A-B binding family protein	N/A	N/A	N/A	K03542	Photosynthesis ;Photosynthesis proteins	N/A	N/A
c31240/f1p6/998	998	118.301	Sobic.001G426000.1	HSP20-like chaperones superfamily protein	KOG0710	Molecular chaperone (small heat-shock protein Hsp26/Hsp42)	O	K13993	Chaperones and folding catalysts ;Protein processing in endoplasmic reticulum	N/A	N/A
c1272/f9p7/1225	1225	118.273	Sobic.001G426800.2	RNA-binding (RRM/RBD/RNP motifs) family protein	KOG0107,KOG4207	Alternative splicing factor SRp20/9G8 (RRM superfamily);Predicted splicing factor, SR protein superfamily	A;A	N/A	N/A	GO:0003676	nucleic acid binding
c3213/f3p2/939	939	118.186	Sobic.006G207800.1	Plastid-lipid associated protein PAP / fibrillin family protein	N/A	N/A	N/A	N/A	N/A	N/A	N/A
c1051/f18p5/924	924	118.123	Sobic.003G437800.1	N/A	N/A	N/A	N/A	N/A	N/A	GO:0006950	response to stress
c2529/f1p0/785	785	118.111	Sobic.004G208400.1	B-box zinc finger family protein	N/A	N/A	N/A	N/A	N/A	GO:0008270,GO:0005622	zinc ion binding;intracellular
c26285/f1p2/824	823	117.978	GRMZM2G335635_T01	N/A	N/A	N/A	N/A	N/A	N/A	N/A	N/A
c4370/f1p6/1950	1950	117.926	Sobic.003G186800.1	Major facilitator superfamily protein	KOG2532	Permease of the major facilitator superfamily	G	N/A	N/A	N/A	N/A
c19199/f1p1/841	841	117.636	Sobic.006G173900.1	glutathione peroxidase 6	KOG1651	Glutathione peroxidase	O	K00432	Arachidonic acid metabolism ;Glutathione metabolism ;Thyroid hormone synthesis	GO:0055114,GO:0016491,GO:0016209,GO:0006979,GO:0004602	oxidation-reduction process;oxidoreductase activity;antioxidant activity;response to oxidative stress;glutathione peroxidase activity
c3262/f1p0/2203	2203	117.131	Sobic.003G132100.1	dicarboxylate diiron protein, putative (Crd1)	N/A	N/A	N/A	K04035	Porphyrin and chlorophyll metabolism	GO:0055114,GO:0046872,GO:0016491	oxidation-reduction process;metal ion binding;oxidoreductase activity
c32342/f1p1/1286	1286	117.105	Sobic.005G056400.1	fructose-bisphosphate aldolase 2	N/A	N/A	N/A	K01623	Glycolysis / Gluconeogenesis ;Pentose phosphate pathway ;Fructose and mannose metabolism ;Carbon fixation in photosynthetic organisms ;Methane metabolism ;Membrane trafficking ;Chromosome and associated proteins ;Exosome	GO:0006096,GO:0004332	glycolytic process;fructose-bisphosphate aldolase activity
c23104/f3p1/1196	1196	116.863	Sobic.003G125701.1	zinc induced facilitator-like 2	KOG2615	Permease of the major facilitator superfamily	R	N/A	N/A	GO:0055085,GO:0016021	transmembrane transport;integral component of membrane
c9961/f1p0/709	709	116.774	Sobic.003G327700.1	cystatin B	N/A	N/A	N/A	N/A	N/A	GO:0004869	cysteine-type endopeptidase inhibitor activity
c7941/f1p0/1194	1194	116.703	Sobic.007G134000.4	general regulatory factor 7	KOG0841	Multifunctional chaperone (14-3-3 family)	O	K06630	DNA repair and recombination proteins ;MAPK signaling pathway - yeast ;Hippo signaling pathway ;Hippo signaling pathway -fly ;PI3K-Akt signaling pathway ;Exosome ;Cell cycle ;Oocyte meiosis ;Neurotrophin signaling pathway ;Viral carcinogenesis ;Epstein-Barr virus infection	GO:0019904	protein domain specific binding
c8434/f1p1/3188	3189	116.582	Sobic.010G160700.1	phosphoenolpyruvate carboxylase 2	N/A	N/A	N/A	K01595	Pyruvate metabolism ;Carbon fixation in photosynthetic organisms ;Carbon fixation pathways in prokaryotes ;Methane metabolism	GO:0015977,GO:0008964,GO:0006099	carbon fixation;phosphoenolpyruvate carboxylase activity;tricarboxylic acid cycle
c32471/f2p4/1026	1026	116.488	Sobic.007G140700.1	aldehyde dehydrogenase 11A3	N/A	N/A	N/A	K00131	Glycolysis / Gluconeogenesis ;Pentose phosphate pathway	GO:0055114,GO:0016491,GO:0008152	oxidation-reduction process;oxidoreductase activity;metabolic process
c28246/f1p1/2066	2066	116.301	Sobic.009G132900.3	pyruvate orthophosphate dikinase	N/A	N/A	N/A	K01006	Pyruvate metabolism ;Carbon fixation in photosynthetic organisms ;Carbon fixation pathways in prokaryotes	GO:0016772,GO:0016310,GO:0016301,GO:0005524,GO:0050242,GO:0006090	transferase activity, transferring phosphorus-containing groups;phosphorylation;kinase activity;ATP binding;pyruvate, phosphate dikinase activity;pyruvate metabolic process
c26335/f3p0/1142	1142	116.279	Sobic.010G267400.1	Chaperone protein htpG family protein	N/A	N/A	N/A	K09487	Chaperones and folding catalysts ;Protein processing in endoplasmic reticulum ;PI3K-Akt signaling pathway ;IL-17 signaling pathway ;Estrogen signaling pathway ;Thyroid hormone synthesis ;Plant-pathogen interaction ;Pathways in cancer ;Prostate cancer ;Fluid shear stress and atherosclerosis	GO:0051082,GO:0006950,GO:0006457,GO:0005524	unfolded protein binding;response to stress;protein folding;ATP binding
c234/f22p15/1698	1709	116.197	Sobic.010G182200.2	GTP binding Elongation factor Tu family protein	N/A	N/A	N/A	K03231	Transfer RNA biogenesis ;RNA transport ;Messenger RNA Biogenesis ;Translation factors ;Membrane trafficking ;Exosome ;Legionellosis	GO:0005525	GTP binding
c13851/f7p3/843	843	116.131	Sobic.010G000500.1	plastocyanin 1	N/A	N/A	N/A	K02638	Photosynthesis ;Photosynthesis proteins	N/A	N/A
c3773/f1p2/1479	1478	116.054	Sobic.009G183700.1	Phosphoglycerate kinase family protein	N/A	N/A	N/A	K00927	Glycolysis / Gluconeogenesis ;Carbon fixation in photosynthetic organisms ;Exosome	GO:0006096,GO:0004618	glycolytic process;phosphoglycerate kinase activity
c44405/f1p5/2355	2355	116.013	Sobic.010G160700.1	phosphoenolpyruvate carboxylase 2	N/A	N/A	N/A	K01595	Pyruvate metabolism ;Carbon fixation in photosynthetic organisms ;Carbon fixation pathways in prokaryotes ;Methane metabolism	GO:0015977,GO:0008964,GO:0006099	carbon fixation;phosphoenolpyruvate carboxylase activity;tricarboxylic acid cycle
c1675/f4p1/1052	1052	115.93	GRMZM2G124644_T01	Chaperone DnaJ-domain superfamily protein	N/A	N/A	N/A	N/A	N/A	N/A	N/A
c21780/f2p57/1340	1340	115.921	Sobic.007G009200.1	adenosine monophosphate kinase	KOG3078	Adenylate kinase	F	K00939	Purine metabolism ;Thiamine metabolism ;Exosome	GO:0019205,GO:0006139,GO:0005524	nucleobase-containing compound kinase activity;nucleobase-containing compound metabolic process;ATP binding
c40249/f1p2/1064	1064	115.863	Sobic.010G160700.1	phosphoenolpyruvate carboxylase 2	N/A	N/A	N/A	K01595	Pyruvate metabolism ;Carbon fixation in photosynthetic organisms ;Carbon fixation pathways in prokaryotes ;Methane metabolism	GO:0015977,GO:0008964,GO:0006099	carbon fixation;phosphoenolpyruvate carboxylase activity;tricarboxylic acid cycle
c8119/f1p10/1104	1104	115.489	Sobic.010G259100.2	Uncharacterised protein family (UPF0114)	N/A	N/A	N/A	N/A	N/A	N/A	N/A
c8930/f2p4/1201	1204	115.268	Sobic.003G404200.1	N/A	N/A	N/A	N/A	N/A	N/A	N/A	N/A
c10710/f1p7/1451	1451	115.208	Sobic.010G262500.1	glyceraldehyde-3-phosphate dehydrogenase C subunit 1	KOG0657	Glyceraldehyde 3-phosphate dehydrogenase	G	K00134	Glycolysis / Gluconeogenesis ;Carbon fixation in photosynthetic organisms ;Membrane trafficking ;HIF-1 signaling pathway ;Exosome ;Alzheimer's disease	GO:0055114,GO:0016620	oxidation-reduction process;oxidoreductase activity, acting on the aldehyde or oxo group of donors, NAD or NADP as acceptor
c27127/f1p1/1982	1982	114.801	Sobic.008G064700.1	galactose-1-phosphate guanylyltransferase (GDP)s;GDP-D-glucose phosphorylases;quercetin 4\'-O-glucosyltransferases	KOG2720	Predicted hydrolase (HIT family)	R	K14190	Ascorbate and aldarate metabolism	GO:0080048	GDP-D-glucose phosphorylase activity
c40001/f69p52/1596	1597	114.575	Sobic.004G055200.1	phosphoglycerate kinase	N/A	N/A	N/A	K00927	Glycolysis / Gluconeogenesis ;Carbon fixation in photosynthetic organisms ;Exosome	GO:0006096,GO:0004618	glycolytic process;phosphoglycerate kinase activity
c12571/f1p12/1238	1239	114.27	N/A	N/A	N/A	N/A	N/A	N/A	N/A	N/A	N/A
c39680/f2p6/1216	1216	113.952	Sobic.002G316700.1	ATPase, F1 complex, gamma subunit protein	KOG1531	F0F1-type ATP synthase, gamma subunit	C	K02115	Oxidative phosphorylation ;Photosynthesis ;Photosynthesis proteins	GO:0046961,GO:0046933,GO:0045261,GO:0015986	proton-transporting ATPase activity, rotational mechanism;proton-transporting ATP synthase activity, rotational mechanism;proton-transporting ATP synthase complex, catalytic core F(1);ATP synthesis coupled proton transport
c29167/f1p9/2542	2542	113.784	Sobic.009G132900.3	pyruvate orthophosphate dikinase	N/A	N/A	N/A	K01006	Pyruvate metabolism ;Carbon fixation in photosynthetic organisms ;Carbon fixation pathways in prokaryotes	GO:0016772,GO:0016310,GO:0016301,GO:0005524,GO:0050242,GO:0006090	transferase activity, transferring phosphorus-containing groups;phosphorylation;kinase activity;ATP binding;pyruvate, phosphate dikinase activity;pyruvate metabolic process
c26287/f1p3/1621	1622	113.702	Sobic.010G160700.1	phosphoenolpyruvate carboxylase 2	N/A	N/A	N/A	K01595	Pyruvate metabolism ;Carbon fixation in photosynthetic organisms ;Carbon fixation pathways in prokaryotes ;Methane metabolism	GO:0015977,GO:0008964,GO:0006099	carbon fixation;phosphoenolpyruvate carboxylase activity;tricarboxylic acid cycle
c33976/f1p1/1266	1268	113.19	Sobic.003G234200.6	beta carbonic anhydrase 4	KOG1578	Predicted carbonic anhydrase involved in protection against oxidative damage	P	K01673	Nitrogen metabolism	GO:0008270,GO:0004089	zinc ion binding;carbonate dehydratase activity
c16592/f1p3/873	873	113.156	Sobic.002G006600.2	alanine-2-oxoglutarate aminotransferase 2	N/A	N/A	N/A	N/A	N/A	GO:0030170,GO:0009058	pyridoxal phosphate binding;biosynthetic process
c28938/f3p10/2507	2505	113.038	Sobic.006G264900.1	magnesium-chelatase subunit chlH, chloroplast, putative / Mg-protoporphyrin IX chelatase, putative (CHLH)	N/A	N/A	N/A	K03403	Porphyrin and chlorophyll metabolism	GO:0016851,GO:0009058	magnesium chelatase activity;biosynthetic process
c22802/f1p0/958	958	113.037	Sobic.009G129800.1	alpha/beta-Hydrolases superfamily protein	KOG3043	Predicted hydrolase related to dienelactone hydrolase	R	N/A	N/A	N/A	N/A
c37628/f1p19/2759	2759	112.897	Sobic.009G132900.3	pyruvate orthophosphate dikinase	N/A	N/A	N/A	K01006	Pyruvate metabolism ;Carbon fixation in photosynthetic organisms ;Carbon fixation pathways in prokaryotes	GO:0016772,GO:0016310,GO:0016301,GO:0005524,GO:0050242,GO:0006090	transferase activity, transferring phosphorus-containing groups;phosphorylation;kinase activity;ATP binding;pyruvate, phosphate dikinase activity;pyruvate metabolic process
c38672/f1p0/801	801	112.721	Sobic.009G015700.1	actin depolymerizing factor 4	KOG1735	Actin depolymerizing factor	Z	K05765	Membrane trafficking ;Exosome ;Regulation of actin cytoskeleton ;Cytoskeleton proteins ;Fc gamma R-mediated phagocytosis ;Axon guidance ;Pertussis	GO:0005622,GO:0003779,GO:0030042,GO:0015629	intracellular;actin binding;actin filament depolymerization;actin cytoskeleton
c37538/f2p0/664	665	112.591	Sobic.010G229450.1	N/A	N/A	N/A	N/A	N/A	N/A	N/A	N/A
c12445/f4p12/1174	1174	112.542	Sobic.001G509200.1	carotenoid cleavage dioxygenase 1	KOG1285	Beta, beta-carotene 15,15'-dioxygenase and related enzymes	Q	K11159	Biosynthesis and biodegradation of secondary metabolites	N/A	N/A
c18105/f1p0/857	857	112.506	Pavir.Hb00755.1	N/A	N/A	N/A	N/A	N/A	N/A	N/A	N/A
c40156/f2p3/1276	1277	112.44	Sobic.001G498200.4	evolutionarily conserved C-terminal region 2	KOG1901	Uncharacterized high-glucose-regulated protein	R	N/A	N/A	N/A	N/A
c23736/f1p9/1883	1889	112.438	Sobic.010G172500.1	ATPase, V1 complex, subunit B protein	N/A	N/A	N/A	K02147	Oxidative phosphorylation ;mTOR signaling pathway ;Exosome ;Phagosome ;Collecting duct acid secretion ;Synaptic vesicle cycle ;Rheumatoid arthritis ;Vibrio cholerae infection ;Epithelial cell signaling in Helicobacter pylori infection	GO:0046034,GO:0015992,GO:0033178,GO:0016820,GO:0015991,GO:0005524	ATP metabolic process;proton transport;proton-transporting two-sector ATPase complex, catalytic domain;hydrolase activity, acting on acid anhydrides, catalyzing transmembrane movement of substances;ATP hydrolysis coupled proton transport;ATP binding
c4523/f1p2/1009	1009	112.256	Sobic.001G118400.1	N/A	N/A	N/A	N/A	N/A	N/A	N/A	N/A
c27683/f5p33/1295	1295	112.17	Sobic.008G094000.1	homolog of Medicago truncatula MTN3	KOG1623	Multitransmembrane protein	R	K15382	Transporters	N/A	N/A
c19171/f4p2/1914	1914	111.991	GRMZM2G419936_T01	N/A	N/A	N/A	N/A	N/A	N/A	N/A	N/A
c21480/f1p1/776	776	111.82	Sobic.002G363100.2	eukaryotic elongation factor 5A-1	KOG3271	Translation initiation factor 5A (eIF-5A)	J	K03263	Translation factors	GO:0045905,GO:0045901,GO:0043022,GO:0006452,GO:0003746,GO:0003723	positive regulation of translational termination;positive regulation of translational elongation;ribosome binding;translational frameshifting;translation elongation factor activity;RNA binding
c27120/f1p2/834	835	111.552	Sobic.008G063100.1	thioredoxin M-type 4	KOG0907	Thioredoxin	O	K03671	Chaperones and folding catalysts ;NOD-like receptor signaling pathway ;Fluid shear stress and atherosclerosis	GO:0045454,GO:0015035,GO:0006662	cell redox homeostasis;protein disulfide oxidoreductase activity;glycerol ether metabolic process
c39788/f1p19/1403	1406	111.456	Sobic.001G219300.1	Lactate/malate dehydrogenase family protein	N/A	N/A	N/A	K00025	Citrate cycle (TCA cycle) ;Pyruvate metabolism ;Glyoxylate and dicarboxylate metabolism ;Carbon fixation in photosynthetic organisms ;Cysteine and methionine metabolism ;Proximal tubule bicarbonate reclamation	GO:0055114,GO:0016491,GO:0016616,GO:0016615,GO:0006108	oxidation-reduction process;oxidoreductase activity;oxidoreductase activity, acting on the CH-OH group of donors, NAD or NADP as acceptor;malate dehydrogenase activity;malate metabolic process
c7/f48p38/1239	1239	111.443	Sobic.006G176700.1	plasma membrane intrinsic protein 1;4	KOG0223	Aquaporin (major intrinsic protein family)	G	K09872	Transporters	GO:0016020,GO:0006810,GO:0005215	membrane;transport;transporter activity
c4283/f1p9/1828	1829	111.383	Sobic.007G093000.1	cytochrome P450, family 71, subfamily A, polypeptide 25	KOG0156	Cytochrome P450 CYP2 subfamily	Q	N/A	N/A	GO:0055114,GO:0020037,GO:0016705,GO:0005506	oxidation-reduction process;heme binding;oxidoreductase activity, acting on paired donors, with incorporation or reduction of molecular oxygen;iron ion binding
c26203/f3p12/1703	1703	111.326	Sobic.001G472800.1	myo-inositol-1-phosphate synthase 2	N/A	N/A	N/A	K01858	Inositol phosphate metabolism ;Streptomycin biosynthesis	GO:0008654,GO:0006021,GO:0004512	phospholipid biosynthetic process;inositol biosynthetic process;inositol-3-phosphate synthase activity
c2897/f2p1/1093	1093	111.315	Sobic.008G136000.1	heat shock protein 70	N/A	N/A	N/A	K03283	Protein phosphatase and associated proteins ;Spliceosome ;Spliceosome ;Ribosome biogenesis ;Mitochondrial biogenesis ;Chaperones and folding catalysts ;Protein processing in endoplasmic reticulum ;Membrane trafficking ;Proteasome ;MAPK signaling pathway ;Cell adhesion molecules and their ligands ;Endocytosis ;Exosome ;Antigen processing and presentation ;Estrogen signaling pathway ;Longevity regu…	N/A	N/A
c37582/f1p1/955	955	111.177	Sobic.006G161500.1	Translation elongation factor EFG/EF2 protein	N/A	N/A	N/A	K02355	Mitochondrial biogenesis ;Translation factors	GO:0005525	GTP binding
c30299/f4p24/1164	1164	111.091	Sobic.009G017800.2	dehydroascorbate reductase 2	KOG1422	Intracellular Cl- channel CLIC, contains GST domain	P	N/A	N/A	GO:0005515	protein binding
c8212/f9p4/1024	1028	110.897	Sobic.002G421300.2	hydroxyproline-rich glycoprotein family protein	N/A	N/A	N/A	N/A	N/A	N/A	N/A
c23300/f1p0/1072	1072	110.756	GRMZM2G171648_T01	N/A	N/A	N/A	N/A	N/A	N/A	N/A	N/A
c18075/f1p0/536	536	110.617	Sobic.010G012800.1	acyl-CoA-binding protein 6	N/A	N/A	N/A	K08762	PPAR signaling pathway	GO:0000062	fatty-acyl-CoA binding
c20089/f2p1/892	892	110.542	Sobic.002G047600.1	Ribosomal protein L23/L15e family protein	KOG1678	60s ribosomal protein L15	J	K02877	Ribosome ;Ribosome	GO:0006412,GO:0005840,GO:0003735	translation;ribosome;structural constituent of ribosome
c40504/f1p2/1066	1066	110.512	Sobic.002G030500.1	Reticulon family protein	KOG1792	Reticulon	U	N/A	N/A	N/A	N/A
c21493/f3p7/1476	1476	110.419	Sobic.009G239900.1	ketol-acid reductoisomerase	N/A	N/A	N/A	K00053	Valine;Pantothenate and CoA biosynthesis	GO:0055114,GO:0009082,GO:0004455,GO:0016491	oxidation-reduction process;branched-chain amino acid biosynthetic process;ketol-acid reductoisomerase activity;oxidoreductase activity
c1376/f17p30/1498	1499	110.16	N/A	N/A	N/A	N/A	N/A	N/A	N/A	N/A	N/A
c3055/f1p0/569	570	109.806	Sobic.008G179500.1	homolog of anti-oxidant 1	KOG1603	Copper chaperone	P	K07213	Mineral absorption	GO:0046872,GO:0030001	metal ion binding;metal ion transport
c8641/f1p12/1185	1185	109.405	Sobic.001G505100.1	gamma tonoplast intrinsic protein	KOG0223	Aquaporin (major intrinsic protein family)	G	K09873	Transporters	GO:0016020,GO:0006810,GO:0005215	membrane;transport;transporter activity
c31370/f1p20/872	872	109.299	Sobic.001G177000.1	photosystem II light harvesting complex gene 2.3	N/A	N/A	N/A	K08913	Photosynthesis - antenna proteins ;Photosynthesis proteins	GO:0016020,GO:0009765	membrane;photosynthesis, light harvesting
c40459/f7p4/1205	1205	109.289	GRMZM2G023152_T01	O-methyltransferase family protein	KOG3178	Hydroxyindole-O-methyltransferase and related SAM-dependent methyltransferases	R	N/A	N/A	GO:0046983,GO:0008171	protein dimerization activity;O-methyltransferase activity
c321/f52p24/1070	1070	109.225	Sobic.005G042000.1	ribulose bisphosphate carboxylase small chain 1A	N/A	N/A	N/A	K01602	Glyoxylate and dicarboxylate metabolism ;Carbon fixation in photosynthetic organisms	N/A	N/A
c19703/f1p0/803	804	109.023	GRMZM2G406101_T01	N/A	N/A	N/A	N/A	N/A	N/A	N/A	N/A
c30988/f1p5/978	980	108.722	GRMZM2G095126_T01	alpha-galactosidase 1	N/A	N/A	N/A	K07407	Galactose metabolism ;Glycerolipid metabolism ;Sphingolipid metabolism ;Glycosphingolipid biosynthesis - globo and isoglobo series	N/A	N/A
c16613/f2p18/1184	1183	108.461	Sobic.002G338000.1	light harvesting complex photosystem II	N/A	N/A	N/A	K08915	Photosynthesis - antenna proteins ;Photosynthesis proteins	GO:0016020,GO:0009765	membrane;photosynthesis, light harvesting
c31405/f1p3/920	920	108.425	Sobic.003G437800.1	N/A	N/A	N/A	N/A	N/A	N/A	GO:0006950	response to stress
c26783/f1p0/587	587	108.38	AC206642.4_FGT001	Ribosomal L29 family protein	KOG3436	60S ribosomal protein L35	J	K02918	Ribosome ;Ribosome	GO:0006412,GO:0005840,GO:0005622,GO:0003735	translation;ribosome;intracellular;structural constituent of ribosome
c1746/f4p4/1304	1304	108.18	Sobic.010G272800.1	FtsH extracellular protease family	N/A	N/A	N/A	K03798	Peptidases ;Chaperones and folding catalysts	GO:0016887,GO:0005524,GO:0006508,GO:0004222	ATPase activity;ATP binding;proteolysis;metalloendopeptidase activity
c33280/f1p3/2479	2475	107.898	Sobic.009G132900.2	pyruvate orthophosphate dikinase	N/A	N/A	N/A	K01006	Pyruvate metabolism ;Carbon fixation in photosynthetic organisms ;Carbon fixation pathways in prokaryotes	GO:0016772,GO:0016310,GO:0016301,GO:0005524,GO:0050242,GO:0006090	transferase activity, transferring phosphorus-containing groups;phosphorylation;kinase activity;ATP binding;pyruvate, phosphate dikinase activity;pyruvate metabolic process
c18986/f1p0/969	969	107.83	Sobic.004G244800.1	Ribosomal protein S8e family protein	KOG3283	40S ribosomal protein S8	J	K02995	Ribosome ;Ribosome	GO:0006412,GO:0005840,GO:0005622,GO:0003735	translation;ribosome;intracellular;structural constituent of ribosome
c6981/f1p2/1218	1219	107.623	Sobic.002G281000.2	plasma membrane intrinsic protein 3	KOG0223	Aquaporin (major intrinsic protein family)	G	K09872	Transporters	GO:0016020,GO:0006810,GO:0005215	membrane;transport;transporter activity
c34416/f3p5/1168	1168	107.497	Sobic.008G064700.1	galactose-1-phosphate guanylyltransferase (GDP)s;GDP-D-glucose phosphorylases;quercetin 4\'-O-glucosyltransferases	KOG2720	Predicted hydrolase (HIT family)	R	K14190	Ascorbate and aldarate metabolism	GO:0080048	GDP-D-glucose phosphorylase activity
c9306/f1p6/1306	1306	107.422	Sobic.003G002300.1	Glucose-6-phosphate/phosphate translocator-related	KOG1441	Glucose-6-phosphate/phosphate and phosphoenolpyruvate/phosphate antiporter;Glucose-6-phosphate/phosphate and phosphoenolpyruvate/phosphate antiporter	E;G	K15283	Transporters	N/A	N/A
c1331/f7p7/1488	1489	107.399	Sobic.004G320800.2	Chaperone DnaJ-domain superfamily protein	N/A	N/A	N/A	N/A	N/A	N/A	N/A
c14106/f2p2/1633	1633	107.397	Sobic.008G081900.2	CLPC homologue 1	N/A	N/A	N/A	K03696	Chaperones and folding catalysts	GO:0005515,GO:0016887,GO:0005524,GO:0019538	protein binding;ATPase activity;ATP binding;protein metabolic process
c26850/f1p4/1234	1235	107.251	Zm00008a040408_T01	photosystem I light harvesting complex gene 3	N/A	N/A	N/A	K08909	Photosynthesis - antenna proteins ;Photosynthesis proteins	GO:0016020,GO:0009765	membrane;photosynthesis, light harvesting
c19675/f1p1/1118	1118	107.246	Sobic.002G329600.1	photosystem II subunit Q-2	N/A	N/A	N/A	K08901	Photosynthesis ;Photosynthesis proteins	GO:0019898,GO:0015979,GO:0009654,GO:0009523,GO:0005509	extrinsic component of membrane;photosynthesis;photosystem II oxygen evolving complex;photosystem II;calcium ion binding
c2449/f4p12/1581	1581	107.239	Sobic.004G001300.1	hydroxypyruvate reductase	KOG0069	Glyoxylate/hydroxypyruvate reductase (D-isomer-specific 2-hydroxy acid dehydrogenase superfamily)	C	K15893	Glyoxylate and dicarboxylate metabolism ;Glycine	GO:0055114,GO:0051287,GO:0016616,GO:0008152	oxidation-reduction process;NAD binding;oxidoreductase activity, acting on the CH-OH group of donors, NAD or NADP as acceptor;metabolic process
c40044/f2p0/1142	1140	107.152	Sobic.002G431100.1	ascorbate peroxidase 1	N/A	N/A	N/A	K00434	Ascorbate and aldarate metabolism ;Glutathione metabolism	GO:0055114,GO:0020037,GO:0006979,GO:0004601	oxidation-reduction process;heme binding;response to oxidative stress;peroxidase activity
c14960/f1p1/456	456	106.916	Sobic.003G064300.2	N/A	N/A	N/A	N/A	N/A	N/A	N/A	N/A
c12838/f1p0/979	977	106.812	Sobic.003G234200.6	beta carbonic anhydrase 4	KOG1578	Predicted carbonic anhydrase involved in protection against oxidative damage	P	K01673	Nitrogen metabolism	GO:0008270,GO:0004089	zinc ion binding;carbonate dehydratase activity
c34173/f64p40/1243	1243	106.7	Sobic.003G370000.1	Chlorophyll A-B binding family protein	N/A	N/A	N/A	K03542	Photosynthesis ;Photosynthesis proteins	N/A	N/A
c15045/f1p25/1634	1634	106.526	Sobic.001G472800.1	myo-inositol-1-phosphate synthase 2	N/A	N/A	N/A	K01858	Inositol phosphate metabolism ;Streptomycin biosynthesis	GO:0008654,GO:0006021,GO:0004512	phospholipid biosynthetic process;inositol biosynthetic process;inositol-3-phosphate synthase activity
c11022/f1p0/863	863	106.516	Sobic.001G128400.1	20S proteasome beta subunit D1	KOG0177	20S proteasome, regulatory subunit beta type PSMB2/PRE1	O	K02734	Peptidases ;Proteasome ;Proteasome	GO:0051603,GO:0005839,GO:0004298	proteolysis involved in cellular protein catabolic process;proteasome core complex;threonine-type endopeptidase activity
c4212/f1p1/1288	1288	105.71	Sobic.001G517700.1	catalase 2	N/A	N/A	N/A	K03781	Glyoxylate and dicarboxylate metabolism ;Tryptophan metabolism ;MAPK signaling pathway - plant ;MAPK signaling pathway - yeast ;FoxO signaling pathway ;Peroxisome ;Longevity regulating pathway - mammal ;Longevity regulating pathway - worm ;Longevity regulating pathway - multiple species ;Amyotrophic lateral sclerosis (ALS)	GO:0055114,GO:0020037,GO:0004096,GO:0006979	oxidation-reduction process;heme binding;catalase activity;response to oxidative stress
c9432/f1p2/812	812	105.707	Sobic.003G039400.1	17.6 kDa class II heat shock protein	N/A	N/A	N/A	K13993	Chaperones and folding catalysts ;Protein processing in endoplasmic reticulum	N/A	N/A
c30633/f1p1/736	736	105.634	Zm00008a034973_T01	GroES-like family protein	KOG1641	Mitochondrial chaperonin	O	K04078	Mitochondrial biogenesis ;Chaperones and folding catalysts	GO:0006457,GO:0005737	protein folding;cytoplasm
c36867/f1p2/1501	1502	105.419	Sobic.004G272100.1	phosphoribulokinase	N/A	N/A	N/A	K00855	Carbon fixation in photosynthetic organisms	GO:0016301,GO:0008152,GO:0005524	kinase activity;metabolic process;ATP binding
c704/f27p17/1219	1221	105.381	Zm00008a029456_T01	Haloacid dehalogenase-like hydrolase (HAD) superfamily protein	KOG3109	Haloacid dehalogenase-like hydrolase	R	N/A	N/A	N/A	N/A
c32609/f1p1/994	992	105.033	Sobic.005G111200.1	Octicosapeptide/Phox/Bem1p family protein	N/A	N/A	N/A	N/A	N/A	GO:0005515	protein binding
c37280/f1p1/1245	1245	104.93	Sobic.007G123800.1	Protein of unknown function (DUF581)	N/A	N/A	N/A	N/A	N/A	N/A	N/A
c31220/f2p2/1053	1056	104.827	Sobic.003G435800.1	Pheophorbide a oxygenase family protein with Rieske [2Fe-2S] domain	N/A	N/A	N/A	K13600	Porphyrin and chlorophyll metabolism	GO:0055114,GO:0010277,GO:0051537,GO:0016491	oxidation-reduction process;chlorophyllide a oxygenase [overall] activity;2 iron, 2 sulfur cluster binding;oxidoreductase activity
c9416/f3p30/2230	2230	104.771	Sobic.004G011700.3	Heat shock protein 70 (Hsp 70) family protein	N/A	N/A	N/A	K09490	Chaperones and folding catalysts ;Protein export ;Protein processing in endoplasmic reticulum ;Membrane trafficking ;Exosome ;Thyroid hormone synthesis ;Prion diseases	N/A	N/A
c34890/f1p1/1438	1438	104.767	Sobic.001G064500.1	DNAJ homologue 2	KOG0712	Molecular chaperone (DnaJ superfamily)	O	K09503	Mitochondrial biogenesis ;Chaperones and folding catalysts ;Protein processing in endoplasmic reticulum	GO:0051082,GO:0031072	unfolded protein binding;heat shock protein binding
c17677/f2p0/923	923	104.728	Sobic.002G370600.1	N/A	N/A	N/A	N/A	N/A	N/A	N/A	N/A
c17403/f1p1/919	919	104.645	Sobic.001G404500.2	Thioredoxin superfamily protein	KOG3160	Gamma-interferon inducible lysosomal thiol reductase	O	K08059	Antigen processing and presentation	N/A	N/A
c18980/f1p27/1157	1160	104.633	Sobic.010G259100.2	Uncharacterised protein family (UPF0114)	N/A	N/A	N/A	N/A	N/A	N/A	N/A
c19270/f4p1/1115	1115	104.452	Sobic.009G108700.2	NADP-malic enzyme 4	N/A	N/A	N/A	K00029	Pyruvate metabolism ;Carbon fixation in photosynthetic organisms	GO:0055114,GO:0004471,GO:0051287	oxidation-reduction process;malate dehydrogenase (decarboxylating) (NAD+) activity;NAD binding
c10292/f2p7/1122	1122	104.442	Sobic.004G238500.1	Pyridine nucleotide-disulphide oxidoreductase family protein	N/A	N/A	N/A	K10960	Porphyrin and chlorophyll metabolism ;Terpenoid backbone biosynthesis	GO:0071949	FAD binding
c31819/f1p0/1068	1068	104.186	Sobic.009G023200.1	N/A	N/A	N/A	N/A	N/A	N/A	N/A	N/A
c36419/f1p0/868	868	104.142	N/A	N/A	N/A	N/A	N/A	N/A	N/A	N/A	N/A
c6863/f1p3/3820	3779	104.003	Sobic.010G160700.1	phosphoenolpyruvate carboxylase 2	N/A	N/A	N/A	K01595	Pyruvate metabolism ;Carbon fixation in photosynthetic organisms ;Carbon fixation pathways in prokaryotes ;Methane metabolism	GO:0015977,GO:0008964,GO:0006099	carbon fixation;phosphoenolpyruvate carboxylase activity;tricarboxylic acid cycle
c31580/f1p0/819	819	104.002	Sobic.003G002300.2	Glucose-6-phosphate/phosphate translocator-related	KOG1441	Glucose-6-phosphate/phosphate and phosphoenolpyruvate/phosphate antiporter;Glucose-6-phosphate/phosphate and phosphoenolpyruvate/phosphate antiporter	E;G	K15283	Transporters	N/A	N/A
c7568/f1p1/3398	3396	103.874	Sobic.010G160700.1	phosphoenolpyruvate carboxylase 2	N/A	N/A	N/A	K01595	Pyruvate metabolism ;Carbon fixation in photosynthetic organisms ;Carbon fixation pathways in prokaryotes ;Methane metabolism	GO:0015977,GO:0008964,GO:0006099	carbon fixation;phosphoenolpyruvate carboxylase activity;tricarboxylic acid cycle
c45221/f1p1/2508	2506	103.806	Sobic.003G036200.1	NADP-malic enzyme 4	N/A	N/A	N/A	K00029	Pyruvate metabolism ;Carbon fixation in photosynthetic organisms	GO:0055114,GO:0004471,GO:0051287	oxidation-reduction process;malate dehydrogenase (decarboxylating) (NAD+) activity;NAD binding
c16192/f1p0/730	730	103.574	Sobic.007G161500.1	proton gradient regulation 5	N/A	N/A	N/A	N/A	N/A	N/A	N/A
c40032/f4p4/1329	1329	103.477	Sobic.009G183700.1	Phosphoglycerate kinase family protein	N/A	N/A	N/A	K00927	Glycolysis / Gluconeogenesis ;Carbon fixation in photosynthetic organisms ;Exosome	GO:0006096,GO:0004618	glycolytic process;phosphoglycerate kinase activity
c242/f4p14/1461	1461	103.446	Sobic.007G025400.1	glyceraldehyde-3-phosphate dehydrogenase C subunit 1	KOG0657	Glyceraldehyde 3-phosphate dehydrogenase	G	K00134	Glycolysis / Gluconeogenesis ;Carbon fixation in photosynthetic organisms ;Membrane trafficking ;HIF-1 signaling pathway ;Exosome ;Alzheimer's disease	GO:0055114,GO:0016620	oxidation-reduction process;oxidoreductase activity, acting on the aldehyde or oxo group of donors, NAD or NADP as acceptor
c18603/f1p3/1691	1697	103.118	Sobic.001G104900.1	ethylene-dependent gravitropism-deficient and yellow-green-like 3	N/A	N/A	N/A	N/A	N/A	N/A	N/A
c35458/f1p0/723	723	102.98	Sobic.003G031900.1	Thioredoxin superfamily protein	KOG1752	Glutaredoxin and related proteins	O	K03676	Chaperones and folding catalysts	GO:0045454,GO:0015035,GO:0009055	cell redox homeostasis;protein disulfide oxidoreductase activity;electron carrier activity
c34166/f16p22/1198	1199	102.818	Sobic.009G130700.1	thylakoid lumen 18.3 kDa protein	N/A	N/A	N/A	N/A	N/A	N/A	N/A
c3235/f2p0/740	741	102.754	Sobic.001G417000.3	Histone superfamily protein	KOG1744	Histone H2B	B	K11252	Chromosome and associated proteins ;Exosome ;Viral carcinogenesis ;Systemic lupus erythematosus ;Alcoholism	GO:0003677,GO:0000786	DNA binding;nucleosome
c21313/f1p0/712	708	102.682	Sobic.009G217900.1	double-stranded DNA-binding family protein	KOG3431	Apoptosis-related protein/predicted DNA-binding protein	D	K06875	Signal transduction mechanisms	GO:0003677	DNA binding
c2697/f5p2/1117	1117	102.628	Sobic.003G412900.2	NAD(P)H dehydrogenase 18	N/A	N/A	N/A	N/A	N/A	N/A	N/A
c36809/f1p10/2899	2899	102.208	Sobic.010G160700.1	phosphoenolpyruvate carboxylase 2	N/A	N/A	N/A	K01595	Pyruvate metabolism ;Carbon fixation in photosynthetic organisms ;Carbon fixation pathways in prokaryotes ;Methane metabolism	GO:0015977,GO:0008964,GO:0006099	carbon fixation;phosphoenolpyruvate carboxylase activity;tricarboxylic acid cycle
c19706/f1p10/1282	1282	102.182	Sobic.008G094000.1	homolog of Medicago truncatula MTN3	KOG1623	Multitransmembrane protein	R	K15382	Transporters	N/A	N/A
c23771/f3p2/1528	1528	102.112	Sobic.001G374400.2	Heavy metal transport/detoxification superfamily protein	KOG1603	Copper chaperone	P	N/A	N/A	GO:0046872,GO:0030001	metal ion binding;metal ion transport
c1743/f3p16/1648	1649	101.863	Sobic.001G064500.1	DNAJ homologue 2	KOG0712	Molecular chaperone (DnaJ superfamily)	O	K09503	Mitochondrial biogenesis ;Chaperones and folding catalysts ;Protein processing in endoplasmic reticulum	GO:0051082,GO:0031072	unfolded protein binding;heat shock protein binding
c6066/f1p2/1309	1309	101.76	Sobic.009G033600.1	S-adenosylmethionine synthetase 1	N/A	N/A	N/A	K00789	Cysteine and methionine metabolism	GO:0006556,GO:0004478,GO:0005524	S-adenosylmethionine biosynthetic process;methionine adenosyltransferase activity;ATP binding
c28591/f1p0/3551	3577	101.74	Sobic.010G160700.1	phosphoenolpyruvate carboxylase 2	N/A	N/A	N/A	K01595	Pyruvate metabolism ;Carbon fixation in photosynthetic organisms ;Carbon fixation pathways in prokaryotes ;Methane metabolism	GO:0015977,GO:0008964,GO:0006099	carbon fixation;phosphoenolpyruvate carboxylase activity;tricarboxylic acid cycle
c15058/f1p0/1248	1261	101.701	Sobic.002G204200.1	related to ubiquitin 1	KOG0005	Ubiquitin-like protein;Ubiquitin-like protein	O;D	K12158	Ubiquitin system	GO:0005515	protein binding
c21424/f1p1/784	784	101.682	Sobic.002G277100.1	triosephosphate isomerase	KOG1643	Triosephosphate isomerase	G	K01803	Glycolysis / Gluconeogenesis ;Fructose and mannose metabolism ;Inositol phosphate metabolism ;Carbon fixation in photosynthetic organisms ;Exosome	GO:0008152,GO:0004807	metabolic process;triose-phosphate isomerase activity
c37442/f2p2/818	818	101.528	Sobic.001G496300.2	RmlC-like cupins superfamily protein	KOG2107	Uncharacterized conserved protein, contains double-stranded beta-helix domain	S	K08967	Cysteine and methionine metabolism	GO:0055114,GO:0010309	oxidation-reduction process;acireductone dioxygenase [iron(II)-requiring] activity
c12990/f1p4/1143	1143	101.458	Sobic.002G047400.1	protein containing PDZ domain, a K-box domain, and a TPR region	N/A	N/A	N/A	N/A	N/A	N/A	N/A
c29884/f1p3/752	752	101.447	Sobic.007G034300.1	N/A	N/A	N/A	N/A	N/A	N/A	N/A	N/A
c849/f6p5/1383	1387	101.272	Sobic.003G134400.2	N/A	N/A	N/A	N/A	N/A	N/A	N/A	N/A
c407/f47p26/1351	1351	101.165	Sobic.004G238100.1	NOD26-like intrinsic protein 4;2	KOG0223	Aquaporin (major intrinsic protein family)	G	K09874	Transporters	GO:0016020,GO:0006810,GO:0005215	membrane;transport;transporter activity
c37006/f2p6/1352	1352	101.135	Sobic.010G255100.2	Aldolase superfamily protein	N/A	N/A	N/A	K01698	Porphyrin and chlorophyll metabolism ;Exosome	GO:0046872,GO:0033014,GO:0004655	metal ion binding;tetrapyrrole biosynthetic process;porphobilinogen synthase activity
c2520/f2p0/1281	1281	101.134	Sobic.003G393900.1	Aldolase superfamily protein	N/A	N/A	N/A	K01623	Glycolysis / Gluconeogenesis ;Pentose phosphate pathway ;Fructose and mannose metabolism ;Carbon fixation in photosynthetic organisms ;Methane metabolism ;Membrane trafficking ;Chromosome and associated proteins ;Exosome	GO:0006096,GO:0004332	glycolytic process;fructose-bisphosphate aldolase activity
c20720/f1p21/1212	1216	101.017	Sobic.001G410200.1	ascorbate peroxidase 1	N/A	N/A	N/A	K00434	Ascorbate and aldarate metabolism ;Glutathione metabolism	GO:0055114,GO:0020037,GO:0006979,GO:0004601	oxidation-reduction process;heme binding;response to oxidative stress;peroxidase activity
c16352/f1p0/1203	1203	100.975	Sobic.003G313000.1	photosystem II reaction center W	N/A	N/A	N/A	K02721	Photosynthesis ;Photosynthesis proteins	GO:0015979,GO:0009523,GO:0009507	photosynthesis;photosystem II;chloroplast
c27777/f1p0/639	637	100.884	Sobic.010G237000.2	Translation machinery associated TMA7	KOG4766	Uncharacterized conserved protein	S			N/A	N/A
c4336/f4p13/1148	1148	100.768	Sobic.008G094000.1	homolog of Medicago truncatula MTN3	KOG1623	Multitransmembrane protein	R	K15382	Transporters	N/A	N/A
c29340/f1p0/785	785	100.627	Sobic.006G201500.1	Ribosomal protein L11 family protein	KOG0886	40S ribosomal protein S2	J	K02870	Ribosome ;Ribosome	GO:0006412,GO:0005840,GO:0003735	translation;ribosome;structural constituent of ribosome
c11319/f1p10/953	953	100.613	Sobic.007G217300.1	heat shock protein 21	KOG0710	Molecular chaperone (small heat-shock protein Hsp26/Hsp42)	O	K13993	Chaperones and folding catalysts ;Protein processing in endoplasmic reticulum	N/A	N/A
c27135/f1p2/1115	1115	100.502	Sobic.002G212000.2	related to AP2 12	N/A	N/A	N/A	K09286	Transcription factors	GO:0006355,GO:0003700	regulation of transcription, DNA-templated;DNA binding transcription factor activity
c20966/f1p4/1177	1178	100.39	Sobic.010G214000.1	CONSTANS-like 3	N/A	N/A	N/A	N/A	N/A	GO:0008270,GO:0005622,GO:0005515	zinc ion binding;intracellular;protein binding
c25065/f1p0/2138	2145	100.324	Sobic.001G472800.1	myo-inositol-1-phosphate synthase 2	N/A	N/A	N/A	K01858	Inositol phosphate metabolism ;Streptomycin biosynthesis	GO:0008654,GO:0006021,GO:0004512	phospholipid biosynthetic process;inositol biosynthetic process;inositol-3-phosphate synthase activity
c19018/f1p9/1827	1826	100.255	Sobic.002G291200.1	UDP-glucose pyrophosphorylase 2	N/A	N/A	N/A	K00963	Pentose and glucuronate interconversions ;Galactose metabolism ;Starch and sucrose metabolism ;Amino sugar and nucleotide sugar metabolism	GO:0070569,GO:0008152	uridylyltransferase activity;metabolic process
c40089/f1p5/1094	1094	100.136	Sobic.004G202200.1	RAB GTPase homolog E1B	N/A	N/A	N/A	K02358	Mitochondrial biogenesis ;Translation factors ;Exosome	GO:0005525	GTP binding
c19159/f1p7/1180	1181	99.9994	Sobic.009G017800.2	dehydroascorbate reductase 2	KOG1422	Intracellular Cl- channel CLIC, contains GST domain	P	N/A	N/A	GO:0005515	protein binding
c15834/f1p0/1681	1681	99.9207	Sobic.001G334300.2	Ribosomal protein S19e family protein	KOG3411	40S ribosomal protein S19	J	N/A	N/A	GO:0006412,GO:0005840,GO:0003735	translation;ribosome;structural constituent of ribosome
c19547/f1p2/1300	1303	99.8796	Sobic.002G112400.4	PGR5-LIKE A	N/A	N/A	N/A	N/A	N/A	N/A	N/A
c28361/f1p0/917	917	99.5818	Sobic.003G082300.1	HSP20-like chaperones superfamily protein	N/A	N/A	N/A	K13993	Chaperones and folding catalysts ;Protein processing in endoplasmic reticulum	N/A	N/A
c24343/f137p88/1478	1478	99.5535	Sobic.004G142800.1	Papain family cysteine protease	KOG1542	Cysteine proteinase Cathepsin F	O	K01373	Peptidases ;Lysosome ;Apoptosis	GO:0008234,GO:0006508	cysteine-type peptidase activity;proteolysis
c39774/f3p24/1327	1327	99.5223	Sobic.001G491000.2	D-ribulose-5-phosphate-3-epimerase	KOG3111	D-ribulose-5-phosphate 3-epimerase	G	K01783	Pentose phosphate pathway ;Pentose and glucuronate interconversions ;Carbon fixation in photosynthetic organisms	GO:0016857,GO:0005975	racemase and epimerase activity, acting on carbohydrates and derivatives;carbohydrate metabolic process
c40056/f15p5/1477	1477	99.5048	Sobic.009G034600.1	N/A	N/A	N/A	N/A	N/A	N/A	N/A	N/A
c3519/f2p7/917	917	99.1565	Sobic.006G264201.1	light harvesting complex photosystem II subunit 6	N/A	N/A	N/A	K08917	Photosynthesis - antenna proteins ;Photosynthesis proteins	GO:0016020,GO:0009765	membrane;photosynthesis, light harvesting
c37100/f1p3/4055	4088	99.0311	Sobic.010G160700.1	phosphoenolpyruvate carboxylase 2	N/A	N/A	N/A	K01595	Pyruvate metabolism ;Carbon fixation in photosynthetic organisms ;Carbon fixation pathways in prokaryotes ;Methane metabolism	GO:0015977,GO:0008964,GO:0006099	carbon fixation;phosphoenolpyruvate carboxylase activity;tricarboxylic acid cycle
c21300/f1p0/1066	1066	99.0078	Sobic.003G082300.1	HSP20-like chaperones superfamily protein	N/A	N/A	N/A	K13993	Chaperones and folding catalysts ;Protein processing in endoplasmic reticulum	N/A	N/A
c36225/f23p11/2561	2561	98.8675	Sobic.006G005600.1	heat shock protein 90.1	N/A	N/A	N/A	K04079	Protein phosphatase and associated proteins ;Mitochondrial biogenesis ;Chaperones and folding catalysts ;Protein processing in endoplasmic reticulum ;Membrane trafficking ;Proteasome ;PI3K-Akt signaling pathway ;Exosome ;Necroptosis ;NOD-like receptor signaling pathway ;Antigen processing and presentation ;Th17 cell differentiation ;IL-17 signaling pathway ;Estrogen signaling pathway ;Progesteron…	GO:0051082,GO:0006950,GO:0006457,GO:0005524	unfolded protein binding;response to stress;protein folding;ATP binding
c19777/f2p4/2339	2339	98.8138	Sobic.010G160700.1	phosphoenolpyruvate carboxylase 2	N/A	N/A	N/A	K01595	Pyruvate metabolism ;Carbon fixation in photosynthetic organisms ;Carbon fixation pathways in prokaryotes ;Methane metabolism	GO:0015977,GO:0008964,GO:0006099	carbon fixation;phosphoenolpyruvate carboxylase activity;tricarboxylic acid cycle
c308/f11p29/1319	1319	98.7418	Sobic.010G262500.1	glyceraldehyde-3-phosphate dehydrogenase C subunit 1	KOG0657	Glyceraldehyde 3-phosphate dehydrogenase	G	K00134	Glycolysis / Gluconeogenesis ;Carbon fixation in photosynthetic organisms ;Membrane trafficking ;HIF-1 signaling pathway ;Exosome ;Alzheimer's disease	GO:0055114,GO:0016620	oxidation-reduction process;oxidoreductase activity, acting on the aldehyde or oxo group of donors, NAD or NADP as acceptor
c30022/f2p6/1407	1407	98.7063	Sobic.007G216300.1	HEAT SHOCK PROTEIN 81.4	N/A	N/A	N/A	K04079	Protein phosphatase and associated proteins ;Mitochondrial biogenesis ;Chaperones and folding catalysts ;Protein processing in endoplasmic reticulum ;Membrane trafficking ;Proteasome ;PI3K-Akt signaling pathway ;Exosome ;Necroptosis ;NOD-like receptor signaling pathway ;Antigen processing and presentation ;Th17 cell differentiation ;IL-17 signaling pathway ;Estrogen signaling pathway ;Progesteron…	GO:0051082,GO:0006950,GO:0006457,GO:0005524	unfolded protein binding;response to stress;protein folding;ATP binding
c38958/f1p0/723	720	98.6856	GRMZM2G139900_T01	Ribosomal protein L7Ae/L30e/S12e/Gadd45 family protein	KOG3406	40S ribosomal protein S12	J	K02951	Ribosome ;Ribosome	GO:0006412,GO:0005840,GO:0005622,GO:0003735	translation;ribosome;intracellular;structural constituent of ribosome
c1819/f3p86/1512	1512	98.6075	Sobic.004G142800.1	Papain family cysteine protease	KOG1542	Cysteine proteinase Cathepsin F	O	K01373	Peptidases ;Lysosome ;Apoptosis	GO:0008234,GO:0006508	cysteine-type peptidase activity;proteolysis
c28524/f1p1/821	822	98.5851	Sobic.001G141300.1	cold, circadian rhythm, and RNA binding 1	N/A	N/A	N/A	N/A	N/A	GO:0003676	nucleic acid binding
c3529/f2p0/1019	1021	98.5731	Sobic.010G054200.1	20S proteasome alpha subunit C1	KOG0178	20S proteasome, regulatory subunit alpha type PSMA4/PRE9	O	K02728	Peptidases ;Proteasome ;Proteasome	GO:0019773,GO:0006511,GO:0004175,GO:0051603,GO:0005839,GO:0004298	proteasome core complex, alpha-subunit complex;ubiquitin-dependent protein catabolic process;endopeptidase activity;proteolysis involved in cellular protein catabolic process;proteasome core complex;threonine-type endopeptidase activity
c7697/f4p3/1130	1134	98.4906	Sobic.007G069200.1	glyoxalase I homolog	KOG2943	Predicted glyoxalase	G	K01759	Pyruvate metabolism	N/A	N/A
c20012/f2p5/1002	1002	98.4742	GRMZM2G181258_T01	thioredoxin M-type 4	KOG0910	Thioredoxin-like protein	O	K03671	Chaperones and folding catalysts ;NOD-like receptor signaling pathway ;Fluid shear stress and atherosclerosis	GO:0045454,GO:0015035,GO:0006662	cell redox homeostasis;protein disulfide oxidoreductase activity;glycerol ether metabolic process
c28365/f3p8/2068	2068	98.1945	Sobic.001G104900.1	ethylene-dependent gravitropism-deficient and yellow-green-like 3	N/A	N/A	N/A	N/A	N/A	N/A	N/A
c12937/f1p4/1637	1632	98.127	Sobic.001G472000.3	polyamine oxidase 1	KOG0029	Amine oxidase	Q	K13366	Arginine and proline metabolism ;beta-Alanine metabolism	N/A	N/A
c12053/f1p2/1057	1058	98.0391	Sobic.010G059800.1	2-oxoglutarate (2OG) and Fe(II)-dependent oxygenase superfamily protein	KOG0143	IroN/Ascorbate family oxidoreductases;IroN/Ascorbate family oxidoreductases	Q;R	N/A	N/A	GO:0055114,GO:0016491	oxidation-reduction process;oxidoreductase activity
c35675/f1p0/746	746	97.8977	Sobic.004G051100.1	N/A	N/A	N/A	N/A	N/A	N/A	N/A	N/A
c31116/f1p1/732	734	97.8204	Sobic.006G162200.1	subunit NDH-M of NAD(P)H:plastoquinone dehydrogenase complex	N/A	N/A	N/A	N/A	N/A	GO:0055114,GO:0016655	oxidation-reduction process;oxidoreductase activity, acting on NAD(P)H, quinone or similar compound as acceptor
c39101/f1p0/1047	1047	97.7155	Sobic.003G234400.4	beta carbonic anhydrase 4	KOG1578	Predicted carbonic anhydrase involved in protection against oxidative damage	P	K01673	Nitrogen metabolism	GO:0008270,GO:0004089	zinc ion binding;carbonate dehydratase activity
c18015/f2p0/765	765	97.6623	Sobic.006G093900.1	RmlC-like cupins superfamily protein	N/A	N/A	N/A	K06995	Function unknown	N/A	N/A
c1687/f5p3/1090	1090	97.5322	Sobic.001G018900.1	Ribosomal protein S4 (RPS4A) family protein	KOG0378	40S ribosomal protein S4	J	K02987	Ribosome ;Ribosome	GO:0003723,GO:0006412,GO:0005840,GO:0005622,GO:0003735	RNA binding;translation;ribosome;intracellular;structural constituent of ribosome
c10697/f1p10/1280	1281	97.5234	GRMZM2G143917_T01	NAD(P)-binding Rossmann-fold superfamily protein	KOG1203	Predicted dehydrogenase	G	N/A	N/A	N/A	N/A
c8239/f117p52/1077	1075	97.3464	Sobic.002G352100.1	photosystem I light harvesting complex gene 2	N/A	N/A	N/A	K08908	Photosynthesis - antenna proteins ;Photosynthesis proteins	GO:0016020,GO:0009765	membrane;photosynthesis, light harvesting
c2082/f3p13/2322	2322	97.009	Sobic.006G005600.1	heat shock protein 90.1	N/A	N/A	N/A	K04079	Protein phosphatase and associated proteins ;Mitochondrial biogenesis ;Chaperones and folding catalysts ;Protein processing in endoplasmic reticulum ;Membrane trafficking ;Proteasome ;PI3K-Akt signaling pathway ;Exosome ;Necroptosis ;NOD-like receptor signaling pathway ;Antigen processing and presentation ;Th17 cell differentiation ;IL-17 signaling pathway ;Estrogen signaling pathway ;Progesteron…	GO:0051082,GO:0006950,GO:0006457,GO:0005524	unfolded protein binding;response to stress;protein folding;ATP binding
c24420/f4p2/883	884	96.7132	Sobic.004G162000.1	rotamase CYP 3	KOG0865	Cyclophilin type peptidyl-prolyl cis-trans isomerase	O	K01802	Protein folding and associated processing	GO:0006457,GO:0003755,GO:0000413	protein folding;peptidyl-prolyl cis-trans isomerase activity;protein peptidyl-prolyl isomerization
c12702/f2p12/1351	1353	96.6776	Zm00008a032942_T01	N/A	N/A	N/A	N/A	N/A	N/A	N/A	N/A
c38564/f1p18/1141	1142	96.356	Sobic.007G009200.1	adenosine monophosphate kinase	KOG3078	Adenylate kinase	F	K00939	Purine metabolism ;Thiamine metabolism ;Exosome	GO:0019205,GO:0006139,GO:0005524	nucleobase-containing compound kinase activity;nucleobase-containing compound metabolic process;ATP binding
c24568/f2p1/1029	1031	96.3304	Sobic.002G078400.1	Ras-related small GTP-binding family protein	KOG0070	GTP-binding ADP-ribosylation factor Arf1	U	K07937,K07977	Membrane trafficking ;Phospholipase D signaling pathway ;GTP-binding proteins ;Endocytosis ;Exosome ;Vibrio cholerae infection ;Legionellosis ;GTP-binding proteins	N/A	N/A
c5863/f1p6/753	753	96.302	Sobic.004G056900.1	photosystem I light harvesting complex gene 1	N/A	N/A	N/A	K08907	Photosynthesis - antenna proteins ;Photosynthesis proteins	GO:0016020,GO:0009765	membrane;photosynthesis, light harvesting
c34470/f2p1/814	821	96.2983	Zm00008a033443_T01	ferredoxin thioredoxin reductase catalytic beta chain family protein	N/A	N/A	N/A	K17892	Others	GO:0055114,GO:0016730	oxidation-reduction process;oxidoreductase activity, acting on iron-sulfur proteins as donors
c2319/f3p6/1710	1711	96.1465	Sobic.008G178800.2	Cobalamin-independent synthase family protein	N/A	N/A	N/A	K00549	Cysteine and methionine metabolism ;Selenocompound metabolism	GO:0008652,GO:0008270,GO:0003871,GO:0009086	cellular amino acid biosynthetic process;zinc ion binding;5-methyltetrahydropteroyltriglutamate-homocysteine S-methyltransferase activity;methionine biosynthetic process
c17727/f2p6/1446	1446	95.8958	Sobic.001G112900.1	Protein of unknown function (DUF760)	N/A	N/A	N/A	N/A	N/A	N/A	N/A
c47151/f22p15/2347	2347	95.891	Sobic.010G223200.1	FtsH extracellular protease family	N/A	N/A	N/A	K03798	Peptidases ;Chaperones and folding catalysts	GO:0016887,GO:0005524,GO:0006508,GO:0004222	ATPase activity;ATP binding;proteolysis;metalloendopeptidase activity
c202/f23p33/1256	1257	95.8452	Sobic.007G009200.1	adenosine monophosphate kinase	KOG3078	Adenylate kinase	F	K00939	Purine metabolism ;Thiamine metabolism ;Exosome	GO:0019205,GO:0006139,GO:0005524	nucleobase-containing compound kinase activity;nucleobase-containing compound metabolic process;ATP binding
c28433/f1p3/3413	3395	95.7371	Sobic.009G132900.2	pyruvate orthophosphate dikinase	N/A	N/A	N/A	K01006	Pyruvate metabolism ;Carbon fixation in photosynthetic organisms ;Carbon fixation pathways in prokaryotes	GO:0016772,GO:0016310,GO:0016301,GO:0005524,GO:0050242,GO:0006090	transferase activity, transferring phosphorus-containing groups;phosphorylation;kinase activity;ATP binding;pyruvate, phosphate dikinase activity;pyruvate metabolic process
c38524/f1p0/974	974	95.7046	Sobic.001G301800.1	HSP20-like chaperones superfamily protein	KOG2265	Nuclear distribution protein NUDC	T	N/A	N/A	N/A	N/A
c31912/f1p1/1238	1238	95.5806	Sobic.006G264900.1	magnesium-chelatase subunit chlH, chloroplast, putative / Mg-protoporphyrin IX chelatase, putative (CHLH)	N/A	N/A	N/A	K03403	Porphyrin and chlorophyll metabolism	GO:0016851,GO:0009058	magnesium chelatase activity;biosynthetic process
c6395/f1p0/895	895	95.5434	Sobic.009G143100.1	photosynthetic electron transfer C	KOG1671	Ubiquinol cytochrome c reductase, subunit RIP1	C	K02636	Photosynthesis ;Photosynthesis proteins	GO:0055114,GO:0051537,GO:0016491,GO:0042651,GO:0009496,GO:0016679	oxidation-reduction process;2 iron, 2 sulfur cluster binding;oxidoreductase activity;thylakoid membrane;plastoquinol--plastocyanin reductase activity;oxidoreductase activity, acting on diphenols and related substances as donors
c1195/f3p5/1267	1267	95.4387	Sobic.006G140700.1	NAD(P)-linked oxidoreductase superfamily protein	KOG1575	Voltage-gated shaker-like K+ channel, subunit beta/KCNAB	C	N/A	N/A	N/A	N/A
c30029/f1p2/1007	1012	95.2919	Sobic.003G015900.1	Cwf15 / Cwc15 cell cycle control family protein	KOG3228	Uncharacterized conserved protein	S	K12863	Spliceosome ;Spliceosome	GO:0005681,GO:0000398	spliceosomal complex;mRNA splicing, via spliceosome
c14481/f1p4/1240	1242	95.2726	Sobic.007G186800.1	general regulatory factor 7	KOG0841	Multifunctional chaperone (14-3-3 family)	O	K06630	DNA repair and recombination proteins ;MAPK signaling pathway - yeast ;Hippo signaling pathway ;Hippo signaling pathway -fly ;PI3K-Akt signaling pathway ;Exosome ;Cell cycle ;Oocyte meiosis ;Neurotrophin signaling pathway ;Viral carcinogenesis ;Epstein-Barr virus infection	GO:0019904	protein domain specific binding
c12624/f1p13/2359	2360	95.2593	GRMZM2G012631_T01	HEAT SHOCK PROTEIN 81.4	N/A	N/A	N/A	K04079	Protein phosphatase and associated proteins ;Mitochondrial biogenesis ;Chaperones and folding catalysts ;Protein processing in endoplasmic reticulum ;Membrane trafficking ;Proteasome ;PI3K-Akt signaling pathway ;Exosome ;Necroptosis ;NOD-like receptor signaling pathway ;Antigen processing and presentation ;Th17 cell differentiation ;IL-17 signaling pathway ;Estrogen signaling pathway ;Progesteron…	GO:0051082,GO:0006950,GO:0006457,GO:0005524	unfolded protein binding;response to stress;protein folding;ATP binding
c14357/f2p0/717	718	95.0343	Sobic.007G004700.1	2Fe-2S ferredoxin-like superfamily protein	N/A	N/A	N/A	K02639	Photosynthesis ;Photosynthesis proteins	GO:0051536,GO:0009055	iron-sulfur cluster binding;electron carrier activity
c35835/f3p9/2253	2253	94.9905	Sobic.006G161500.1	Translation elongation factor EFG/EF2 protein	N/A	N/A	N/A	K02355	Mitochondrial biogenesis ;Translation factors	GO:0005525	GTP binding
c31891/f1p1/3330	3331	94.9368	LOC_Os09g00999.1	N/A	N/A	N/A	N/A	N/A	N/A	N/A	N/A
c30449/f1p11/1033	1033	94.5023	Sobic.001G376700.1	photolyase/blue-light receptor 2	N/A	N/A	N/A	N/A	N/A	N/A	N/A
c10117/f1p0/643	643	94.4904	Sobic.001G047800.1	Cytochrome bd ubiquinol oxidase, 14kDa subunit	KOG3440	Ubiquinol cytochrome c reductase, subunit QCR7	C	K00417	Oxidative phosphorylation ;Cardiac muscle contraction ;Alzheimer's disease ;Parkinson's disease ;Huntington's disease ;Non-alcoholic fatty liver disease (NAFLD)	GO:0006122,GO:0005750	mitochondrial electron transport, ubiquinol to cytochrome c;mitochondrial respiratory chain complex III
c45605/f1p2/2594	2596	94.4394	Sobic.010G160700.1	phosphoenolpyruvate carboxylase 2	N/A	N/A	N/A	K01595	Pyruvate metabolism ;Carbon fixation in photosynthetic organisms ;Carbon fixation pathways in prokaryotes ;Methane metabolism	GO:0015977,GO:0008964,GO:0006099	carbon fixation;phosphoenolpyruvate carboxylase activity;tricarboxylic acid cycle
c3325/f3p2/1137	1137	94.2831	Sobic.007G166300.1	lactate/malate dehydrogenase family protein	KOG1496	Malate dehydrogenase	C	K00051	Pyruvate metabolism ;Carbon fixation in photosynthetic organisms	GO:0055114,GO:0016491,GO:0016616,GO:0016615,GO:0006108	oxidation-reduction process;oxidoreductase activity;oxidoreductase activity, acting on the CH-OH group of donors, NAD or NADP as acceptor;malate dehydrogenase activity;malate metabolic process
c28377/f1p2/975	975	94.0685	Sobic.005G145201.1	general regulatory factor 2	KOG0841	Multifunctional chaperone (14-3-3 family)	O	K06630	DNA repair and recombination proteins ;MAPK signaling pathway - yeast ;Hippo signaling pathway ;Hippo signaling pathway -fly ;PI3K-Akt signaling pathway ;Exosome ;Cell cycle ;Oocyte meiosis ;Neurotrophin signaling pathway ;Viral carcinogenesis ;Epstein-Barr virus infection	GO:0019904	protein domain specific binding
c16070/f1p2/2381	2388	93.7416	Sobic.009G132900.3	pyruvate orthophosphate dikinase	N/A	N/A	N/A	K01006	Pyruvate metabolism ;Carbon fixation in photosynthetic organisms ;Carbon fixation pathways in prokaryotes	GO:0016772,GO:0016310,GO:0016301,GO:0005524,GO:0050242,GO:0006090	transferase activity, transferring phosphorus-containing groups;phosphorylation;kinase activity;ATP binding;pyruvate, phosphate dikinase activity;pyruvate metabolic process
c22620/f1p0/1190	1191	93.689	Sobic.001G435800.1	Calcium-binding EF-hand family protein	N/A	N/A	N/A	N/A	N/A	N/A	N/A
c938/f19p9/1098	1098	93.29	Sobic.009G131100.1	Bax inhibitor-1 family protein	KOG2322	N-methyl-D-aspartate receptor glutamate-binding subunit	T	K06890	Function unknown	N/A	N/A
c34011/f5p14/1448	1449	93.2276	Sobic.005G179300.1	general control non-repressible 5	N/A	N/A	N/A	N/A	N/A	GO:0016887,GO:0005524	ATPase activity;ATP binding
c32051/f4p2/1132	1128	93.1816	Sobic.009G043000.1	thioredoxin F2	KOG0907	Thioredoxin	O	N/A	N/A	GO:0045454,GO:0015035,GO:0006662	cell redox homeostasis;protein disulfide oxidoreductase activity;glycerol ether metabolic process
c11999/f1p5/1689	1689	93.0348	GRMZM5G890323_T01	N/A	N/A	N/A	N/A	N/A	N/A	N/A	N/A
c12023/f2p8/1344	1345	92.9118	Sobic.009G033600.1	S-adenosylmethionine synthetase 1	N/A	N/A	N/A	K00789	Cysteine and methionine metabolism	GO:0006556,GO:0004478,GO:0005524	S-adenosylmethionine biosynthetic process;methionine adenosyltransferase activity;ATP binding
c37944/f1p9/2084	2085	92.9026	Sobic.001G420100.1	heat shock protein 70	N/A	N/A	N/A	K03283	Protein phosphatase and associated proteins ;Spliceosome ;Spliceosome ;Ribosome biogenesis ;Mitochondrial biogenesis ;Chaperones and folding catalysts ;Protein processing in endoplasmic reticulum ;Membrane trafficking ;Proteasome ;MAPK signaling pathway ;Cell adhesion molecules and their ligands ;Endocytosis ;Exosome ;Antigen processing and presentation ;Estrogen signaling pathway ;Longevity regu…	N/A	N/A
c625/f14p18/1264	1264	92.7534	Sobic.006G054300.1	catalytics;hydrolases	N/A	N/A	N/A	N/A	N/A	GO:0016787	hydrolase activity
c23720/f2p6/1482	1482	92.605	Sobic.003G034300.1	myb-like transcription factor family protein	N/A	N/A	N/A	N/A	N/A	N/A	N/A
c24383/f36p37/1251	1251	92.5966	Sobic.004G288700.1	plasma membrane intrinsic protein 1;4	KOG0223	Aquaporin (major intrinsic protein family)	G	K09872	Transporters	GO:0016020,GO:0006810,GO:0005215	membrane;transport;transporter activity
c30844/f1p9/1054	1054	92.5034	Sobic.009G234600.1	photosystem II light harvesting complex gene B1B2	N/A	N/A	N/A	K08912	Photosynthesis - antenna proteins ;Photosynthesis proteins	GO:0016020,GO:0009765	membrane;photosynthesis, light harvesting
c14362/f3p2/1087	1088	92.1509	Sobic.001G412800.1	Glutathione S-transferase family protein	KOG0406	Glutathione S-transferase	O	K00799	Glutathione metabolism ;Metabolism of xenobiotics by cytochrome P450 ;Drug metabolism - cytochrome P450 ;Transporters ;Pathways in cancer ;Chemical carcinogenesis ;Hepatocellular carcinoma ;Fluid shear stress and atherosclerosis ;Platinum drug resistance	GO:0005515	protein binding
c21973/f1p1/1302	1303	92.1382	Sobic.001G519800.1	glyceraldehyde-3-phosphate dehydrogenase B subunit	KOG0657	Glyceraldehyde 3-phosphate dehydrogenase	G	K05298	Carbon fixation in photosynthetic organisms	GO:0055114,GO:0016620	oxidation-reduction process;oxidoreductase activity, acting on the aldehyde or oxo group of donors, NAD or NADP as acceptor
c27209/f1p2/1102	1103	92.0321	Sobic.006G264201.1	light harvesting complex photosystem II subunit 6	N/A	N/A	N/A	K08917	Photosynthesis - antenna proteins ;Photosynthesis proteins	GO:0016020,GO:0009765	membrane;photosynthesis, light harvesting
c28227/f2p2/1101	1102	91.8388	Sobic.001G524900.1	Ribosomal L5P family protein	KOG0398	Mitochondrial/chloroplast ribosomal protein L5/L7	J	K02931	Ribosome ;Ribosome	N/A	N/A
c3676/f3p6/882	882	91.837	Sobic.004G228900.1	HSP20-like chaperones superfamily protein	KOG0710	Molecular chaperone (small heat-shock protein Hsp26/Hsp42)	O	K13993	Chaperones and folding catalysts ;Protein processing in endoplasmic reticulum	N/A	N/A
c855/f14p10/1145	1147	91.7136	Sobic.004G283100.1	N/A	N/A	N/A	N/A	N/A	N/A	N/A	N/A
c8247/f1p2/1405	1405	91.4714	Sobic.001G180200.1	Peroxisomal membrane 22 kDa (Mpv17/PMP22) family protein	KOG1944	Peroxisomal membrane protein MPV17 and related proteins	R	K13348	Peroxisome	GO:0016021	integral component of membrane
c21524/f3p23/1711	1711	91.4563	Sobic.003G359100.1	sedoheptulose-bisphosphatase	KOG1458	Fructose-1,6-bisphosphatase	G	K01100	Carbon fixation in photosynthetic organisms	GO:0042578,GO:0042132,GO:0005975	phosphoric ester hydrolase activity;fructose 1,6-bisphosphate 1-phosphatase activity;carbohydrate metabolic process
c16785/f1p4/1290	1290	91.3473	Sobic.004G202200.1	RAB GTPase homolog E1B	N/A	N/A	N/A	K02358	Mitochondrial biogenesis ;Translation factors ;Exosome	GO:0005525	GTP binding
c13122/f1p0/723	723	91.3359	Sobic.009G247900.1	Late embryogenesis abundant protein	N/A	N/A	N/A	N/A	N/A	N/A	N/A
c6294/f1p23/2356	2356	91.3313	Sobic.001G508800.1	beta-amylase 1	N/A	N/A	N/A	K01177	Starch and sucrose metabolism	GO:0016161,GO:0000272	beta-amylase activity;polysaccharide catabolic process
c4375/f1p2/1572	1572	91.3153	Sobic.003G151600.2	S-adenosylmethionine synthetase family protein	N/A	N/A	N/A	K00789	Cysteine and methionine metabolism	GO:0006556,GO:0004478,GO:0005524	S-adenosylmethionine biosynthetic process;methionine adenosyltransferase activity;ATP binding
c25361/f2p7/2087	2088	91.1382	Sobic.007G197200.1	rotamase FKBP 1	KOG0543	FKBP-type peptidyl-prolyl cis-trans isomerase	O	K09571	Chaperones and folding catalysts ;Estrogen signaling pathway	GO:0006457	protein folding
c10599/f1p4/1865	1867	91.0813	Sobic.001G489900.1	cycling DOF factor 2	N/A	N/A	N/A	N/A	N/A	GO:0006355,GO:0003677	regulation of transcription, DNA-templated;DNA binding
c34039/f17p11/1558	1558	91.0439	Sobic.004G247000.1	glutamine synthase clone R1	N/A	N/A	N/A	K01915	Glyoxylate and dicarboxylate metabolism ;Nitrogen metabolism ;Alanine;Arginine biosynthesis ;Two-component system ;Exosome ;Necroptosis ;Glutamatergic synapse ;GABAergic synapse	GO:0006807,GO:0006542,GO:0004356	nitrogen compound metabolic process;glutamine biosynthetic process;glutamate-ammonia ligase activity
c25924/f1p5/2750	2751	90.9345	Sobic.010G160700.1	phosphoenolpyruvate carboxylase 2	N/A	N/A	N/A	K01595	Pyruvate metabolism ;Carbon fixation in photosynthetic organisms ;Carbon fixation pathways in prokaryotes ;Methane metabolism	GO:0015977,GO:0008964,GO:0006099	carbon fixation;phosphoenolpyruvate carboxylase activity;tricarboxylic acid cycle
c7267/f2p4/1076	1076	90.8849	Sobic.004G168500.1	2-cysteine peroxiredoxin B	KOG0852	Alkyl hydroperoxide reductase, thiol specific antioxidant and related enzymes	O	K03386	Exosome ;Apoptosis - fly	GO:0055114,GO:0051920,GO:0016491	oxidation-reduction process;peroxiredoxin activity;oxidoreductase activity
c2095/f5p6/1077	1077	90.8468	Sobic.001G512500.1	Protein of unknown function (DUF3353)	N/A	N/A	N/A	N/A	N/A	N/A	N/A
c33466/f1p22/1233	1233	90.708	Sobic.004G142800.1	Papain family cysteine protease	KOG1542	Cysteine proteinase Cathepsin F	O	K01373	Peptidases ;Lysosome ;Apoptosis	GO:0008234,GO:0006508	cysteine-type peptidase activity;proteolysis
c6156/f1p0/876	876	90.6617	Sobic.010G267400.1	Chaperone protein htpG family protein	N/A	N/A	N/A	K09487	Chaperones and folding catalysts ;Protein processing in endoplasmic reticulum ;PI3K-Akt signaling pathway ;IL-17 signaling pathway ;Estrogen signaling pathway ;Thyroid hormone synthesis ;Plant-pathogen interaction ;Pathways in cancer ;Prostate cancer ;Fluid shear stress and atherosclerosis	GO:0051082,GO:0006950,GO:0006457,GO:0005524	unfolded protein binding;response to stress;protein folding;ATP binding
c43430/f1p1/1559	1561	90.6497	Sobic.010G239500.6	polyubiquitin 10	KOG0005,KOG0001	Ubiquitin-like protein;Ubiquitin-like protein;Ubiquitin and ubiquitin-like proteins;Ubiquitin and ubiquitin-like proteins	O;D;O;R	K08770	Ubiquitin system ;PPAR signaling pathway	N/A	N/A
c7623/f1p1/990	990	90.6261	Sobic.002G316700.1	ATPase, F1 complex, gamma subunit protein	KOG1531	F0F1-type ATP synthase, gamma subunit	C	K02115	Oxidative phosphorylation ;Photosynthesis ;Photosynthesis proteins	GO:0046961,GO:0046933,GO:0045261,GO:0015986	proton-transporting ATPase activity, rotational mechanism;proton-transporting ATP synthase activity, rotational mechanism;proton-transporting ATP synthase complex, catalytic core F(1);ATP synthesis coupled proton transport
c1034/f5p10/2789	2789	90.6128	Sobic.005G132000.1	auxin response factor 2	N/A	N/A	N/A	N/A	N/A	GO:0006355,GO:0005634,GO:0003677,GO:0009725	regulation of transcription, DNA-templated;nucleus;DNA binding;response to hormone
c34436/f4p13/1591	1591	90.5339	Sobic.003G002300.1	Glucose-6-phosphate/phosphate translocator-related	KOG1441	Glucose-6-phosphate/phosphate and phosphoenolpyruvate/phosphate antiporter;Glucose-6-phosphate/phosphate and phosphoenolpyruvate/phosphate antiporter	E;G	K15283	Transporters	N/A	N/A
c2314/f20p14/1731	1732	90.3718	Sobic.005G186700.1	serine carboxypeptidase-like 26	KOG1282	Serine carboxypeptidases (lysosomal cathepsin A);Serine carboxypeptidases (lysosomal cathepsin A)	O;E	K16297	Peptidases	GO:0006508,GO:0004185	proteolysis;serine-type carboxypeptidase activity
c17204/f1p0/717	717	90.2502	Sobic.010G150800.1	N/A	N/A	N/A	N/A	N/A	N/A	N/A	N/A
c36810/f1p1/1740	1739	90.2204	Sobic.001G425500.1	HSP20-like chaperones superfamily protein	KOG0710	Molecular chaperone (small heat-shock protein Hsp26/Hsp42)	O	K13993	Chaperones and folding catalysts ;Protein processing in endoplasmic reticulum	N/A	N/A
c4760/f1p2/1083	1083	90.1822	Sobic.006G135100.1	CONSTANS-like 5	KOG1601	GATA-4/5/6 transcription factors	K	N/A	N/A	GO:0008270,GO:0005622,GO:0005515	zinc ion binding;intracellular;protein binding
c3344/f1p9/1143	1144	90.1664	Sobic.010G011200.1	chaperonin 60 beta	N/A	N/A	N/A	K04077	Messenger RNA Biogenesis ;Mitochondrial biogenesis ;Chaperones and folding catalysts ;RNA degradation ;Exosome ;Longevity regulating pathway - worm ;Type I diabetes mellitus ;Legionellosis ;Tuberculosis	GO:0005524	ATP binding
c36484/f1p1/1061	1064	90.1425	Zm00008a015155_T01	light harvesting complex of photosystem II 5	N/A	N/A	N/A	K08916	Photosynthesis - antenna proteins ;Photosynthesis proteins	GO:0016020,GO:0009765	membrane;photosynthesis, light harvesting
c20664/f1p0/752	752	90.0911	Sobic.002G116000.1	UDP-Glycosyltransferase superfamily protein	N/A	N/A	N/A	K13679	Starch and sucrose metabolism ;Glycosyltransferases	N/A	N/A
c26453/f9p5/1132	1132	90.0141	Sobic.004G311100.1	pyrophosphorylase 6	KOG1626	Inorganic pyrophosphatase/Nucleosome remodeling factor, subunit NURF38	C	K01507	Oxidative phosphorylation	GO:0006796,GO:0005737,GO:0004427,GO:0000287	phosphate-containing compound metabolic process;cytoplasm;inorganic diphosphatase activity;magnesium ion binding
c23833/f2p3/1278	1278	89.9848	Sobic.010G005500.1	ferredoxin-NADP(+)-oxidoreductase 2	N/A	N/A	N/A	K02641	Photosynthesis ;Photosynthesis proteins	GO:0055114,GO:0016491	oxidation-reduction process;oxidoreductase activity
c14069/f5p14/1672	1673	89.9517	Sobic.003G139500.1	CBL-interacting protein kinase 1	KOG0583	Serine/threonine protein kinase	T	K07198	Protein kinases ;Mitochondrial biogenesis ;Membrane trafficking ;Apelin signaling pathway ;FoxO signaling pathway ;PI3K-Akt signaling pathway ;AMPK signaling pathway ;mTOR signaling pathway ;Autophagy - animal ;Tight junction ;Insulin signaling pathway ;Glucagon signaling pathway ;Adipocytokine signaling pathway ;Oxytocin signaling pathway ;Longevity regulating pathway - mammal ;Longevity regulat…	GO:0007165,GO:0006468,GO:0005524,GO:0004672	signal transduction;protein phosphorylation;ATP binding;protein kinase activity
c42612/f1p1/2430	2431	89.8492	Sobic.010G160700.1	phosphoenolpyruvate carboxylase 2	N/A	N/A	N/A	K01595	Pyruvate metabolism ;Carbon fixation in photosynthetic organisms ;Carbon fixation pathways in prokaryotes ;Methane metabolism	GO:0015977,GO:0008964,GO:0006099	carbon fixation;phosphoenolpyruvate carboxylase activity;tricarboxylic acid cycle
c12764/f3p5/1703	1703	89.751	Sobic.007G216300.1	HEAT SHOCK PROTEIN 81.4	N/A	N/A	N/A	K04079	Protein phosphatase and associated proteins ;Mitochondrial biogenesis ;Chaperones and folding catalysts ;Protein processing in endoplasmic reticulum ;Membrane trafficking ;Proteasome ;PI3K-Akt signaling pathway ;Exosome ;Necroptosis ;NOD-like receptor signaling pathway ;Antigen processing and presentation ;Th17 cell differentiation ;IL-17 signaling pathway ;Estrogen signaling pathway ;Progesteron…	GO:0051082,GO:0006950,GO:0006457,GO:0005524	unfolded protein binding;response to stress;protein folding;ATP binding
c8835/f2p6/1181	1181	89.7419	Sobic.001G297500.1	myb-like transcription factor family protein	N/A	N/A	N/A	N/A	N/A	N/A	N/A
c37255/f1p2/1931	1933	89.7202	Sobic.004G050100.1	polyubiquitin 10	KOG0005,KOG0001	Ubiquitin-like protein;Ubiquitin-like protein;Ubiquitin and ubiquitin-like proteins;Ubiquitin and ubiquitin-like proteins	O;D;O;R	K08770	Ubiquitin system ;PPAR signaling pathway	N/A	N/A
c13834/f2p10/1539	1548	89.6016	Sobic.009G033600.1	S-adenosylmethionine synthetase 1	N/A	N/A	N/A	K00789	Cysteine and methionine metabolism	GO:0006556,GO:0004478,GO:0005524	S-adenosylmethionine biosynthetic process;methionine adenosyltransferase activity;ATP binding
c13753/f8p6/1391	1390	89.5931	Sobic.006G220800.1	Glycine cleavage T-protein family	N/A	N/A	N/A	K00605	Glyoxylate and dicarboxylate metabolism ;Glycine;One carbon pool by folate	N/A	N/A
c9166/f1p2/1517	1518	89.5926	Sobic.006G105900.2	glyceraldehyde 3-phosphate dehydrogenase A subunit 2	KOG0657	Glyceraldehyde 3-phosphate dehydrogenase	G	K05298	Carbon fixation in photosynthetic organisms	GO:0055114,GO:0016620	oxidation-reduction process;oxidoreductase activity, acting on the aldehyde or oxo group of donors, NAD or NADP as acceptor
c10164/f1p0/753	753	89.5549	Sobic.003G200501.1	Histone superfamily protein	KOG1744	Histone H2B	B	K11252	Chromosome and associated proteins ;Exosome ;Viral carcinogenesis ;Systemic lupus erythematosus ;Alcoholism	GO:0003677,GO:0000786	DNA binding;nucleosome
c40295/f12p11/1610	1610	89.4363	Sobic.009G033600.1	S-adenosylmethionine synthetase 1	N/A	N/A	N/A	K00789	Cysteine and methionine metabolism	GO:0006556,GO:0004478,GO:0005524	S-adenosylmethionine biosynthetic process;methionine adenosyltransferase activity;ATP binding
c16166/f2p6/1356	1356	89.4189	Sobic.006G005600.1	heat shock protein 90.1	N/A	N/A	N/A	K04079	Protein phosphatase and associated proteins ;Mitochondrial biogenesis ;Chaperones and folding catalysts ;Protein processing in endoplasmic reticulum ;Membrane trafficking ;Proteasome ;PI3K-Akt signaling pathway ;Exosome ;Necroptosis ;NOD-like receptor signaling pathway ;Antigen processing and presentation ;Th17 cell differentiation ;IL-17 signaling pathway ;Estrogen signaling pathway ;Progesteron…	GO:0051082,GO:0006950,GO:0006457,GO:0005524	unfolded protein binding;response to stress;protein folding;ATP binding
c17397/f1p1/3332	3310	89.3824	Sobic.010G160700.1	phosphoenolpyruvate carboxylase 2	N/A	N/A	N/A	K01595	Pyruvate metabolism ;Carbon fixation in photosynthetic organisms ;Carbon fixation pathways in prokaryotes ;Methane metabolism	GO:0015977,GO:0008964,GO:0006099	carbon fixation;phosphoenolpyruvate carboxylase activity;tricarboxylic acid cycle
c2097/f3p11/1461	1461	89.1852	Sobic.004G259200.1	ADP/ATP carrier 2	KOG0749	Mitochondrial ADP/ATP carrier proteins	C	K05863	Mitochondrial biogenesis ;Transporters ;Calcium signaling pathway ;cGMP - PKG signaling pathway ;Necroptosis ;Cellular senescence ;Parkinson's disease ;Huntington's disease ;HTLV-I infection	N/A	N/A
c26854/f1p0/974	975	89.1613	Sobic.009G024200.1	Protein of unknown function (DUF1218)	N/A	N/A	N/A	N/A	N/A	N/A	N/A
c29755/f2p6/1902	1903	89.1162	Sobic.008G136000.1	heat shock protein 70	N/A	N/A	N/A	K03283	Protein phosphatase and associated proteins ;Spliceosome ;Spliceosome ;Ribosome biogenesis ;Mitochondrial biogenesis ;Chaperones and folding catalysts ;Protein processing in endoplasmic reticulum ;Membrane trafficking ;Proteasome ;MAPK signaling pathway ;Cell adhesion molecules and their ligands ;Endocytosis ;Exosome ;Antigen processing and presentation ;Estrogen signaling pathway ;Longevity regu…	N/A	N/A
c26985/f1p1/825	825	89.1118	Sobic.001G029100.4	Transcriptional coactivator/pterin dehydratase	N/A	N/A	N/A	N/A	N/A	GO:0008124,GO:0006729	4-alpha-hydroxytetrahydrobiopterin dehydratase activity;tetrahydrobiopterin biosynthetic process
c13953/f1p0/1856	1856	89.0526	Sobic.009G000500.1	peroxin 14	N/A	N/A	N/A	K13343	Membrane trafficking ;Peroxisome	GO:0016560,GO:0005778,GO:0005515	protein import into peroxisome matrix, docking;peroxisomal membrane;protein binding
c27215/f1p0/1230	1230	88.9965	Sobic.008G135000.1	Ribosomal protein L2 family	KOG2309	60s ribosomal protein L2/L8	J	K02938	Ribosome ;Ribosome	GO:0006412,GO:0005840,GO:0005622,GO:0003735	translation;ribosome;intracellular;structural constituent of ribosome
c28756/f1p20/1080	1080	88.9709	GRMZM2G010884_T01	photosystem I light harvesting complex gene 3	N/A	N/A	N/A	K08909	Photosynthesis - antenna proteins ;Photosynthesis proteins	GO:0016020,GO:0009765	membrane;photosynthesis, light harvesting
c32212/f1p0/845	845	88.9582	Sobic.001G411100.1	Thioredoxin superfamily protein	KOG4498	Uncharacterized conserved protein	S	N/A	N/A	N/A	N/A
c43956/f1p1/2185	2185	88.9546	Sobic.010G160700.1	phosphoenolpyruvate carboxylase 2	N/A	N/A	N/A	K01595	Pyruvate metabolism ;Carbon fixation in photosynthetic organisms ;Carbon fixation pathways in prokaryotes ;Methane metabolism	GO:0015977,GO:0008964,GO:0006099	carbon fixation;phosphoenolpyruvate carboxylase activity;tricarboxylic acid cycle
c20261/f1p4/1082	1082	88.8345	Sobic.004G050000.3	polyubiquitin 10	KOG0005,KOG0001	Ubiquitin-like protein;Ubiquitin-like protein;Ubiquitin and ubiquitin-like proteins;Ubiquitin and ubiquitin-like proteins	O;D;O;R	K08770,K04551	Ubiquitin system ;PPAR signaling pathway ;Ubiquitin system ;Endocytosis ;Exosome ;Mitophagy - animal ;Parkinson's disease ;Kaposi's sarcoma-associated herpesvirus infection	N/A	N/A
c24441/f1p5/1360	1360	88.819	Sobic.009G245000.2	ADPGLC-PPase large subunit	KOG1322	GDP-mannose pyrophosphorylase/mannose-1-phosphate guanylyltransferase	M	K00975	Starch and sucrose metabolism ;Amino sugar and nucleotide sugar metabolism ;Biofilm formation - Escherichia coli	GO:0016779,GO:0009058	nucleotidyltransferase activity;biosynthetic process
c35150/f1p0/1038	1039	88.7579	Sobic.005G101300.1	Chaperone DnaJ-domain superfamily protein	N/A	N/A	N/A	N/A	N/A	N/A	N/A
c7673/f1p0/671	672	88.679	Aco014837.1	N/A	N/A	N/A	N/A	N/A	N/A	N/A	N/A
c14613/f1p0/985	985	88.6614	Sobic.002G421300.2	hydroxyproline-rich glycoprotein family protein	N/A	N/A	N/A	N/A	N/A	N/A	N/A
c18480/f1p1/728	728	88.6257	Sobic.010G229450.1	N/A	N/A	N/A	N/A	N/A	N/A	N/A	N/A
c19856/f1p2/1041	1041	88.5587	Sobic.010G021300.2	histone H1-3	N/A	N/A	N/A	K11275	Chromosome and associated proteins	GO:0006334,GO:0005634,GO:0003677,GO:0000786	nucleosome assembly;nucleus;DNA binding;nucleosome
c15690/f1p3/1355	1353	88.4656	Sobic.003G234400.4	beta carbonic anhydrase 4	KOG1578	Predicted carbonic anhydrase involved in protection against oxidative damage	P	K01673	Nitrogen metabolism	GO:0008270,GO:0004089	zinc ion binding;carbonate dehydratase activity
c30236/f1p0/727	727	88.3953	Sobic.010G140600.1	BolA-like family protein	KOG2313	Stress-induced protein UVI31+	T	N/A	N/A	N/A	N/A
c7309/f1p1/980	977	88.3817	GRMZM2G074472_T01	N/A	N/A	N/A	N/A	N/A	N/A	N/A	N/A
c34099/f24p11/1245	1245	88.2641	Sobic.010G000300.1	BAX inhibitor 1	KOG1629	Bax-mediated apoptosis inhibitor TEGT/BI-1	V	N/A	N/A	N/A	N/A
c38697/f1p0/1017	1017	88.0343	GRMZM2G136306_T01	Protein of unknown function (DUF1279)	KOG4526	Predicted membrane protein	S	N/A	N/A	N/A	N/A
c22046/f1p0/911	911	87.832	Sobic.004G244800.1	Ribosomal protein S8e family protein	KOG3283	40S ribosomal protein S8	J	K02995	Ribosome ;Ribosome	GO:0006412,GO:0005840,GO:0005622,GO:0003735	translation;ribosome;intracellular;structural constituent of ribosome
c16553/f1p1/662	662	87.8115	Sobic.003G303700.2	N/A	N/A	N/A	N/A	N/A	N/A	N/A	N/A
c32613/f1p0/913	913	87.7824	Sobic.010G160700.1	phosphoenolpyruvate carboxylase 2	N/A	N/A	N/A	K01595	Pyruvate metabolism ;Carbon fixation in photosynthetic organisms ;Carbon fixation pathways in prokaryotes ;Methane metabolism	GO:0015977,GO:0008964,GO:0006099	carbon fixation;phosphoenolpyruvate carboxylase activity;tricarboxylic acid cycle
c8275/f1p0/648	648	87.664	Sobic.007G211700.1	Ribosomal protein L31e family protein	KOG0893	60S ribosomal protein L31	J	K02910	Ribosome ;Ribosome	GO:0006412,GO:0005840,GO:0005622,GO:0003735	translation;ribosome;intracellular;structural constituent of ribosome
c1425/f6p7/1095	1095	87.555	Sobic.009G234600.1	photosystem II light harvesting complex gene B1B2	N/A	N/A	N/A	K08912	Photosynthesis - antenna proteins ;Photosynthesis proteins	GO:0016020,GO:0009765	membrane;photosynthesis, light harvesting
c30823/f1p2/3811	3767	87.5414	Sobic.010G160700.1	phosphoenolpyruvate carboxylase 2	N/A	N/A	N/A	K01595	Pyruvate metabolism ;Carbon fixation in photosynthetic organisms ;Carbon fixation pathways in prokaryotes ;Methane metabolism	GO:0015977,GO:0008964,GO:0006099	carbon fixation;phosphoenolpyruvate carboxylase activity;tricarboxylic acid cycle
c36048/f1p3/1149	1149	87.5327	Sobic.002G047400.1	protein containing PDZ domain, a K-box domain, and a TPR region	N/A	N/A	N/A	N/A	N/A	N/A	N/A
c3624/f1p0/800	800	87.5258	Sobic.009G247900.1	Late embryogenesis abundant protein	N/A	N/A	N/A	N/A	N/A	N/A	N/A
c2590/f2p0/790	790	87.3604	Sobic.008G188600.1	Lactoylglutathione lyase / glyoxalase I family protein	KOG2944	Glyoxalase	G	N/A	N/A	N/A	N/A
c26481/f1p2/1474	1470	87.3236	Sobic.003G189000.2	RAB GTPase homolog 1C	KOG0084	GTPase Rab1/YPT1, small G protein superfamily, and related GTP-binding proteins;GTPase Rab1/YPT1, small G protein superfamily, and related GTP-binding proteins	T;U	K07874	Membrane trafficking ;GTP-binding proteins ;Exosome ;Legionellosis	GO:0005525	GTP binding
c12472/f1p0/657	657	87.3161	Sobic.009G191300.1	photosystem II reaction center W	N/A	N/A	N/A	K02721	Photosynthesis ;Photosynthesis proteins	GO:0015979,GO:0009523,GO:0009507	photosynthesis;photosystem II;chloroplast
c38250/f1p3/1736	1736	87.243	Sobic.009G140800.1	Protein of unknown function, DUF647	KOG4249	Uncharacterized conserved protein	S	N/A	N/A	N/A	N/A
c19136/f1p2/1213	1213	87.1933	Sobic.003G337000.1	ubiquitin-conjugating enzyme 11	KOG0417	Ubiquitin-protein ligase	O	K06689	Protein processing in endoplasmic reticulum ;Ubiquitin mediated proteolysis ;Ubiquitin system ;MAPK signaling pathway - fly ;Toll and Imd signaling pathway	GO:0005515	protein binding
c38302/f1p0/829	829	86.9945	Sobic.004G051100.1	N/A	N/A	N/A	N/A	N/A	N/A	N/A	N/A
c30268/f1p1/1069	1069	86.9932	Sobic.010G255600.1	chloroplast thylakoid lumen protein	N/A	N/A	N/A	N/A	N/A	N/A	N/A
c1091/f8p12/1091	1093	86.9854	Sobic.001G467300.3	Ribosomal protein S3Ae	KOG1628	40S ribosomal protein S3A	J	K02984	Ribosome ;Ribosome	GO:0006412,GO:0005840,GO:0005622,GO:0003735	translation;ribosome;intracellular;structural constituent of ribosome
c13334/f8p26/1226	1226	86.8377	Sobic.001G391300.1	galactinol synthase 1	KOG1950	Glycosyl transferase, family 8 - glycogenin	G	K18819	Galactose metabolism	GO:0016757,GO:0047216,GO:0006012	transferase activity, transferring glycosyl groups;inositol 3-alpha-galactosyltransferase activity;galactose metabolic process
c14767/f1p0/716	716	86.7998	Sobic.006G021000.1	flavin-dependent monooxygenase 1	N/A	N/A	N/A	K00485	Drug metabolism - cytochrome P450	N/A	N/A
c35816/f1p0/956	959	86.7237	Sobic.009G191300.1	photosystem II reaction center W	N/A	N/A	N/A	K02721	Photosynthesis ;Photosynthesis proteins	GO:0015979,GO:0009523,GO:0009507	photosynthesis;photosystem II;chloroplast
c32593/f2p1/1372	1372	86.7202	Sobic.003G052300.1	Raffinose synthase family protein	N/A	N/A	N/A	K06617	Galactose metabolism	N/A	N/A
c26134/f2p2/1264	1266	86.6859	Sobic.004G331700.1	aspartate aminotransferase 5	N/A	N/A	N/A	K00811	Alanine;Cysteine and methionine metabolism ;Arginine biosynthesis ;Arginine and proline metabolism ;Tyrosine metabolism ;Phenylalanine metabolism ;Phenylalanine;Amino acid related enzymes ;Isoquinoline alkaloid biosynthesis ;Tropane	GO:0030170,GO:0009058,GO:0008483,GO:0006520	pyridoxal phosphate binding;biosynthetic process;transaminase activity;cellular amino acid metabolic process
c9089/f6p4/1206	1205	86.5562	Sobic.004G050100.4	polyubiquitin 10	KOG0005,KOG0001	Ubiquitin-like protein;Ubiquitin-like protein;Ubiquitin and ubiquitin-like proteins;Ubiquitin and ubiquitin-like proteins	O;D;O;R	K08770,K04551	Ubiquitin system ;PPAR signaling pathway ;Ubiquitin system ;Endocytosis ;Exosome ;Mitophagy - animal ;Parkinson's disease ;Kaposi's sarcoma-associated herpesvirus infection	N/A	N/A
c15223/f1p7/2143	2147	86.3771	Sobic.009G072100.1	Zinc finger C-x8-C-x5-C-x3-H type family protein	N/A	N/A	N/A	N/A	N/A	GO:0046872	metal ion binding
c4101/f1p0/638	641	86.3725	Sobic.003G443300.1	cytochrome B5 isoform B	KOG0537	Cytochrome b5	C	N/A	N/A	N/A	N/A
c9168/f1p1/895	895	86.3012	Sobic.009G259100.1	CCT motif family protein	N/A	N/A	N/A	N/A	N/A	GO:0005515	protein binding
c39965/f1p3/1197	1198	86.2969	Sobic.002G030500.1	Reticulon family protein	KOG1792	Reticulon	U	N/A	N/A	N/A	N/A
c46475/f28p15/2487	2487	86.1603	Sobic.010G160700.1	phosphoenolpyruvate carboxylase 2	N/A	N/A	N/A	K01595	Pyruvate metabolism ;Carbon fixation in photosynthetic organisms ;Carbon fixation pathways in prokaryotes ;Methane metabolism	GO:0015977,GO:0008964,GO:0006099	carbon fixation;phosphoenolpyruvate carboxylase activity;tricarboxylic acid cycle
c39560/f1p0/934	934	86.123	Sobic.001G046000.1	Chaperonin-like RbcX protein	N/A	N/A	N/A	N/A	N/A	N/A	N/A
c16777/f1p0/572	572	86.0518	Sobic.003G082200.1	HSP20-like chaperones superfamily protein	KOG0710	Molecular chaperone (small heat-shock protein Hsp26/Hsp42)	O	K13993	Chaperones and folding catalysts ;Protein processing in endoplasmic reticulum	N/A	N/A
c30563/f1p0/831	831	86.0155	Sobic.004G202200.1	RAB GTPase homolog E1B	N/A	N/A	N/A	K02358	Mitochondrial biogenesis ;Translation factors ;Exosome	GO:0005525	GTP binding
c32152/f1p1/1383	1395	85.9645	Sobic.003G387900.1	ribosomal protein L5 B	KOG0875	60S ribosomal protein L5	J	K02932	Protein phosphatase and associated proteins ;Ribosome ;Ribosome	GO:0006412,GO:0005840,GO:0005622,GO:0003735,GO:0008097	translation;ribosome;intracellular;structural constituent of ribosome;5S rRNA binding
c13936/f1p3/972	972	85.9554	Sobic.001G070000.2	actin depolymerizing factor 6	KOG1735	Actin depolymerizing factor	Z	K05765	Membrane trafficking ;Exosome ;Regulation of actin cytoskeleton ;Cytoskeleton proteins ;Fc gamma R-mediated phagocytosis ;Axon guidance ;Pertussis	GO:0005622,GO:0003779,GO:0030042,GO:0015629	intracellular;actin binding;actin filament depolymerization;actin cytoskeleton
c1067/f6p15/1152	1152	85.9018	Sobic.004G208400.1	B-box zinc finger family protein	N/A	N/A	N/A	N/A	N/A	GO:0008270,GO:0005622	zinc ion binding;intracellular
c22038/f1p3/1468	1470	85.8572	GRMZM2G166692_T01	Protein of unknown function (DUF581)	N/A	N/A	N/A	N/A	N/A	N/A	N/A
c26908/f2p1/611	612	85.7701	Sobic.003G055300.1	photosystem II subunit X	N/A	N/A	N/A	N/A	N/A	GO:0016020,GO:0015979,GO:0009523	membrane;photosynthesis;photosystem II
c17851/f1p0/719	719	85.6999	GRMZM2G120432_T01	Ribosomal protein S11 family protein	KOG0407	40S ribosomal protein S14	J	K02955	Ribosome ;Ribosome	GO:0006412,GO:0005840,GO:0003735	translation;ribosome;structural constituent of ribosome
c2975/f1p16/893	893	85.6879	Sobic.007G009200.1	adenosine monophosphate kinase	KOG3078	Adenylate kinase	F	K00939	Purine metabolism ;Thiamine metabolism ;Exosome	GO:0019205,GO:0006139,GO:0005524	nucleobase-containing compound kinase activity;nucleobase-containing compound metabolic process;ATP binding
c9857/f1p0/815	815	85.634	Sobic.001G390300.1	calmodulin 5	KOG0027	Calmodulin and related proteins (EF-Hand superfamily)	T	K02183	Protein phosphatase and associated proteins ;Membrane trafficking ;Chromosome and associated proteins ;Ras signaling pathway ;Rap1 signaling pathway ;MAPK signaling pathway - plant ;Apelin signaling pathway ;Calcium signaling pathway ;Phosphatidylinositol signaling system ;cAMP signaling pathway ;cGMP - PKG signaling pathway ;Exosome ;Oocyte meiosis ;Cellular senescence ;Insulin signaling pathway…	N/A	N/A
c30865/f1p3/1191	1191	85.5654	Sobic.003G125701.1	zinc induced facilitator-like 2	KOG2615	Permease of the major facilitator superfamily	R	N/A	N/A	GO:0055085,GO:0016021	transmembrane transport;integral component of membrane
c31231/f1p0/924	924	85.3919	Sobic.002G297300.1	photosystem I P subunit	N/A	N/A	N/A	N/A	N/A	N/A	N/A
c30329/f1p0/848	848	85.2707	Sobic.001G076500.1	ribosomal protein S9	KOG1753	40S ribosomal protein S16	J	K02996	Ribosome ;Ribosome	GO:0006412,GO:0005840,GO:0003735	translation;ribosome;structural constituent of ribosome
c4658/f2p2/1155	1155	85.2094	Sobic.002G431100.1	ascorbate peroxidase 1	N/A	N/A	N/A	K00434	Ascorbate and aldarate metabolism ;Glutathione metabolism	GO:0055114,GO:0020037,GO:0006979,GO:0004601	oxidation-reduction process;heme binding;response to oxidative stress;peroxidase activity
c37733/f4p4/1339	1339	85.1162	Sobic.007G216300.1	HEAT SHOCK PROTEIN 81.4	N/A	N/A	N/A	K04079	Protein phosphatase and associated proteins ;Mitochondrial biogenesis ;Chaperones and folding catalysts ;Protein processing in endoplasmic reticulum ;Membrane trafficking ;Proteasome ;PI3K-Akt signaling pathway ;Exosome ;Necroptosis ;NOD-like receptor signaling pathway ;Antigen processing and presentation ;Th17 cell differentiation ;IL-17 signaling pathway ;Estrogen signaling pathway ;Progesteron…	GO:0051082,GO:0006950,GO:0006457,GO:0005524	unfolded protein binding;response to stress;protein folding;ATP binding
c29848/f1p1/827	827	84.9554	Sobic.006G265900.1	thioredoxin X	KOG0910	Thioredoxin-like protein	O	K03671	Chaperones and folding catalysts ;NOD-like receptor signaling pathway ;Fluid shear stress and atherosclerosis	GO:0045454,GO:0015035,GO:0006662	cell redox homeostasis;protein disulfide oxidoreductase activity;glycerol ether metabolic process
c2075/f3p22/1605	1606	84.8478	Sobic.005G231500.1	rubisco activase	KOG0651	26S proteasome regulatory complex, ATPase RPT4	O	N/A	N/A	GO:0005524	ATP binding
c7462/f2p1/1211	1211	84.8425	Sobic.009G178600.1	ADP-ribosylation factor A1F	KOG0070	GTP-binding ADP-ribosylation factor Arf1	U	K07937,K07977	Membrane trafficking ;Phospholipase D signaling pathway ;GTP-binding proteins ;Endocytosis ;Exosome ;Vibrio cholerae infection ;Legionellosis ;GTP-binding proteins	N/A	N/A
c5735/f1p0/1035	1035	84.6745	Sobic.006G102000.1	Plastid-lipid associated protein PAP / fibrillin family protein	N/A	N/A	N/A	N/A	N/A	N/A	N/A
c33818/f8p8/1182	1182	84.6396	Sobic.010G160700.1	phosphoenolpyruvate carboxylase 2	N/A	N/A	N/A	K01595	Pyruvate metabolism ;Carbon fixation in photosynthetic organisms ;Carbon fixation pathways in prokaryotes ;Methane metabolism	GO:0015977,GO:0008964,GO:0006099	carbon fixation;phosphoenolpyruvate carboxylase activity;tricarboxylic acid cycle
c30856/f1p14/1887	1887	84.6348	Pavir.Ga01281.1	Adenosylmethionine decarboxylase family protein	KOG0788	S-adenosylmethionine decarboxylase	T	K01611	Cysteine and methionine metabolism ;Arginine and proline metabolism	GO:0008295,GO:0006597,GO:0004014	spermidine biosynthetic process;spermine biosynthetic process;adenosylmethionine decarboxylase activity
c26398/f1p2/935	935	84.558	Sobic.004G079100.2	A20/AN1-like zinc finger family protein	KOG3173	Predicted Zn-finger protein	R	N/A	N/A	GO:0008270,GO:0003677	zinc ion binding;DNA binding
c26982/f2p3/1521	1521	84.4143	Sobic.002G314300.1	APS reductase 3	KOG0189	Phosphoadenosine phosphosulfate reductase	E	K05907	Sulfur metabolism	GO:0045454,GO:0008152,GO:0003824	cell redox homeostasis;metabolic process;catalytic activity
c6679/f2p3/1142	1145	84.3949	Sobic.001G065800.1	glutathione S-transferase TAU 25	KOG0406	Glutathione S-transferase	O	K00799	Glutathione metabolism ;Metabolism of xenobiotics by cytochrome P450 ;Drug metabolism - cytochrome P450 ;Transporters ;Pathways in cancer ;Chemical carcinogenesis ;Hepatocellular carcinoma ;Fluid shear stress and atherosclerosis ;Platinum drug resistance	GO:0005515	protein binding
c32068/f1p1/922	922	84.3666	Sobic.001G022900.1	ferredoxin 3	N/A	N/A	N/A	K02639	Photosynthesis ;Photosynthesis proteins	GO:0051536,GO:0009055	iron-sulfur cluster binding;electron carrier activity
c5804/f1p1/1302	1303	84.3332	Sobic.002G112400.1	PGR5-LIKE A	N/A	N/A	N/A	N/A	N/A	N/A	N/A
c30433/f1p8/943	943	84.2944	Sobic.001G410200.1	ascorbate peroxidase 1	N/A	N/A	N/A	K00434	Ascorbate and aldarate metabolism ;Glutathione metabolism	GO:0055114,GO:0020037,GO:0006979,GO:0004601	oxidation-reduction process;heme binding;response to oxidative stress;peroxidase activity
c37945/f1p2/1217	1216	84.2818	Sobic.010G160700.1	phosphoenolpyruvate carboxylase 2	N/A	N/A	N/A	K01595	Pyruvate metabolism ;Carbon fixation in photosynthetic organisms ;Carbon fixation pathways in prokaryotes ;Methane metabolism	GO:0015977,GO:0008964,GO:0006099	carbon fixation;phosphoenolpyruvate carboxylase activity;tricarboxylic acid cycle
c34192/f55p29/1202	1203	84.2266	Sobic.006G264201.1	light harvesting complex photosystem II subunit 6	N/A	N/A	N/A	K08917	Photosynthesis - antenna proteins ;Photosynthesis proteins	GO:0016020,GO:0009765	membrane;photosynthesis, light harvesting
c804/f12p7/2048	2049	84.2069	Sobic.008G064700.1	galactose-1-phosphate guanylyltransferase (GDP)s;GDP-D-glucose phosphorylases;quercetin 4\'-O-glucosyltransferases	KOG2720	Predicted hydrolase (HIT family)	R	K14190	Ascorbate and aldarate metabolism	GO:0080048	GDP-D-glucose phosphorylase activity
c17526/f1p1/1720	1723	84.0705	Sobic.008G053200.1	fructose-bisphosphate aldolase 2	N/A	N/A	N/A	K01623	Glycolysis / Gluconeogenesis ;Pentose phosphate pathway ;Fructose and mannose metabolism ;Carbon fixation in photosynthetic organisms ;Methane metabolism ;Membrane trafficking ;Chromosome and associated proteins ;Exosome	GO:0006096,GO:0004332	glycolytic process;fructose-bisphosphate aldolase activity
c8722/f1p4/1419	1419	83.9654	Sobic.004G260800.1	fatty acid desaturase 2	N/A	N/A	N/A	K10256	Biosynthesis of unsaturated fatty acids ;Lipid biosynthesis proteins	GO:0055114,GO:0016717,GO:0006629	oxidation-reduction process;oxidoreductase activity, acting on paired donors, with oxidation of a pair of donors resulting in the reduction of molecular oxygen to two molecules of water;lipid metabolic process
c25788/f1p5/2115	2115	83.9243	Sobic.010G223200.1	FtsH extracellular protease family	N/A	N/A	N/A	K03798	Peptidases ;Chaperones and folding catalysts	GO:0016887,GO:0005524,GO:0006508,GO:0004222	ATPase activity;ATP binding;proteolysis;metalloendopeptidase activity
c46306/f1p0/2362	2362	83.8624	Sobic.010G160700.1	phosphoenolpyruvate carboxylase 2	N/A	N/A	N/A	K01595	Pyruvate metabolism ;Carbon fixation in photosynthetic organisms ;Carbon fixation pathways in prokaryotes ;Methane metabolism	GO:0015977,GO:0008964,GO:0006099	carbon fixation;phosphoenolpyruvate carboxylase activity;tricarboxylic acid cycle
c3218/f1p2/1146	1146	83.777	GRMZM2G152041_T02	N/A	N/A	N/A	N/A	N/A	N/A	N/A	N/A
c36085/f1p12/1348	1348	83.7615	Sobic.009G207900.1	N/A	N/A	N/A	N/A	N/A	N/A	N/A	N/A
c23680/f1p6/1199	1199	83.6797	Sobic.004G028300.1	alpha/beta-Hydrolases superfamily protein	N/A	N/A	N/A	N/A	N/A	GO:0016788,GO:0006886,GO:0006505	hydrolase activity, acting on ester bonds;intracellular protein transport;GPI anchor metabolic process
c24206/f1p9/1563	1563	83.5767	Sobic.003G002300.1	Glucose-6-phosphate/phosphate translocator-related	KOG1441	Glucose-6-phosphate/phosphate and phosphoenolpyruvate/phosphate antiporter;Glucose-6-phosphate/phosphate and phosphoenolpyruvate/phosphate antiporter	E;G	K15283	Transporters	N/A	N/A
c36458/f1p0/1132	1132	83.3839	Sobic.003G419900.1	photosystem II reaction center PSB28 protein	N/A	N/A	N/A	K08903	Photosynthesis ;Photosynthesis proteins	GO:0016020,GO:0015979,GO:0009654,GO:0009523	membrane;photosynthesis;photosystem II oxygen evolving complex;photosystem II
c7817/f1p2/1752	1752	83.3371	Sobic.001G034700.1	actin depolymerizing factor 4	KOG1735	Actin depolymerizing factor	Z	K05765	Membrane trafficking ;Exosome ;Regulation of actin cytoskeleton ;Cytoskeleton proteins ;Fc gamma R-mediated phagocytosis ;Axon guidance ;Pertussis	GO:0005622,GO:0003779,GO:0030042,GO:0015629	intracellular;actin binding;actin filament depolymerization;actin cytoskeleton
c13134/f1p0/891	892	83.3293	Pavir.Ea03282.1	N/A	N/A	N/A	N/A	N/A	N/A	N/A	N/A
c11362/f3p2/905	905	83.3259	Sobic.002G307600.1	Calcium-dependent lipid-binding (CaLB domain) family protein	KOG1030	Predicted Ca2+-dependent phospholipid-binding protein	R	N/A	N/A	GO:0005515	protein binding
c37830/f1p2/1116	1116	83.2411	Sobic.003G132100.1	dicarboxylate diiron protein, putative (Crd1)	N/A	N/A	N/A	K04035	Porphyrin and chlorophyll metabolism	GO:0055114,GO:0046872,GO:0016491	oxidation-reduction process;metal ion binding;oxidoreductase activity
c15808/f1p1/1621	1616	83.1608	Sobic.009G017800.2	dehydroascorbate reductase 2	KOG1422	Intracellular Cl- channel CLIC, contains GST domain	P	N/A	N/A	GO:0005515	protein binding
c6283/f1p12/1678	1678	83.1509	Sobic.001G472800.1	myo-inositol-1-phosphate synthase 2	N/A	N/A	N/A	K01858	Inositol phosphate metabolism ;Streptomycin biosynthesis	GO:0008654,GO:0006021,GO:0004512	phospholipid biosynthetic process;inositol biosynthetic process;inositol-3-phosphate synthase activity
c20920/f1p5/1490	1491	83.1441	Sobic.002G150700.1	poly(A) binding protein 2	KOG0123	Polyadenylate-binding protein (RRM superfamily);Polyadenylate-binding protein (RRM superfamily)	A;J	K13126	Spliceosome ;RNA transport ;mRNA surveillance pathway ;Messenger RNA Biogenesis ;RNA degradation	GO:0003723,GO:0003676	RNA binding;nucleic acid binding
c33611/f1p4/1000	1000	83.1008	GRMZM2G124644_T01	Chaperone DnaJ-domain superfamily protein	N/A	N/A	N/A	N/A	N/A	N/A	N/A
c23669/f6p6/1641	1642	83.0645	Sobic.001G154100.1	DNAJ homologue 2	KOG0712	Molecular chaperone (DnaJ superfamily)	O	K09503	Mitochondrial biogenesis ;Chaperones and folding catalysts ;Protein processing in endoplasmic reticulum	GO:0051082,GO:0031072	unfolded protein binding;heat shock protein binding
c36483/f2p3/966	966	83.0077	Sobic.010G272800.1	FtsH extracellular protease family	N/A	N/A	N/A	K03798	Peptidases ;Chaperones and folding catalysts	GO:0016887,GO:0005524,GO:0006508,GO:0004222	ATPase activity;ATP binding;proteolysis;metalloendopeptidase activity
c31365/f1p1/888	891	82.9575	Sobic.002G210200.1	Histone superfamily protein	KOG1744	Histone H2B	B	K11252	Chromosome and associated proteins ;Exosome ;Viral carcinogenesis ;Systemic lupus erythematosus ;Alcoholism	GO:0003677,GO:0000786	DNA binding;nucleosome
c1459/f4p12/1464	1464	82.8848	Sobic.002G217200.1	Cysteine proteinases superfamily protein	KOG1543	Cysteine proteinase Cathepsin L	O	K01366	Peptidases ;Lysosome ;Apoptosis	GO:0008234,GO:0006508	cysteine-type peptidase activity;proteolysis
c37865/f1p2/1269	1269	82.8552	Sobic.001G472800.4	myo-inositol-1-phosphate synthase 2	N/A	N/A	N/A	N/A	N/A	GO:0008654,GO:0006021,GO:0004512	phospholipid biosynthetic process;inositol biosynthetic process;inositol-3-phosphate synthase activity
c39737/f11p19/1428	1427	82.8453	GRMZM2G479885_T01	basic region/leucine zipper motif 53	N/A	N/A	N/A	N/A	N/A	GO:0043565,GO:0006355,GO:0003700	sequence-specific DNA binding;regulation of transcription, DNA-templated;DNA binding transcription factor activity
c27789/f1p10/1776	1776	82.7319	Sobic.001G508800.1	beta-amylase 1	N/A	N/A	N/A	K01177	Starch and sucrose metabolism	GO:0016161,GO:0000272	beta-amylase activity;polysaccharide catabolic process
c13320/f4p6/1417	1417	82.6648	Sobic.005G231500.1	rubisco activase	KOG0651	26S proteasome regulatory complex, ATPase RPT4	O	N/A	N/A	GO:0005524	ATP binding
c16628/f1p0/857	857	82.6219	Sobic.003G246400.1	ribosomal protein L12-C	KOG1715	Mitochondrial/chloroplast ribosomal protein L12	J	K02935	Ribosome ;Ribosome	GO:0006412,GO:0003735	translation;structural constituent of ribosome
c12703/f1p2/1173	1173	82.6205	Sobic.010G160700.1	phosphoenolpyruvate carboxylase 2	N/A	N/A	N/A	K01595	Pyruvate metabolism ;Carbon fixation in photosynthetic organisms ;Carbon fixation pathways in prokaryotes ;Methane metabolism	GO:0015977,GO:0008964,GO:0006099	carbon fixation;phosphoenolpyruvate carboxylase activity;tricarboxylic acid cycle
c20530/f1p2/1153	1154	82.5718	Sobic.005G074400.2	PDI-like 1-2	KOG0190	Protein disulfide isomerase (prolyl 4-hydroxylase beta subunit)	O	K09580	Chaperones and folding catalysts ;Protein processing in endoplasmic reticulum ;Membrane trafficking ;Exosome	GO:0009306,GO:0005788,GO:0045454	protein secretion;endoplasmic reticulum lumen;cell redox homeostasis
c23260/f1p2/941	941	82.4849	Sobic.004G018400.1	Cyclophilin-like peptidyl-prolyl cis-trans isomerase family protein	KOG0865	Cyclophilin type peptidyl-prolyl cis-trans isomerase	O	K01802	Protein folding and associated processing	GO:0006457,GO:0003755,GO:0000413	protein folding;peptidyl-prolyl cis-trans isomerase activity;protein peptidyl-prolyl isomerization
c4226/f3p5/1089	1090	82.4515	Sobic.010G042800.1	20S proteasome beta subunit E1	KOG0175	20S proteasome, regulatory subunit beta type PSMB5/PSMB8/PRE2	O	K02737	Peptidases ;Proteasome ;Proteasome	GO:0051603,GO:0005839,GO:0004298	proteolysis involved in cellular protein catabolic process;proteasome core complex;threonine-type endopeptidase activity
c594/f49p50/1649	1648	82.2561	Sobic.004G272100.1	phosphoribulokinase	N/A	N/A	N/A	K00855	Carbon fixation in photosynthetic organisms	GO:0016301,GO:0008152,GO:0005524	kinase activity;metabolic process;ATP binding
c2450/f8p9/1327	1327	82.2023	Sobic.006G084400.1	thylakoidal ascorbate peroxidase	N/A	N/A	N/A	K00434	Ascorbate and aldarate metabolism ;Glutathione metabolism	GO:0055114,GO:0020037,GO:0006979,GO:0004601	oxidation-reduction process;heme binding;response to oxidative stress;peroxidase activity
c38789/f3p6/1296	1296	81.9953	Sobic.010G182200.2	GTP binding Elongation factor Tu family protein	N/A	N/A	N/A	K03231	Transfer RNA biogenesis ;RNA transport ;Messenger RNA Biogenesis ;Translation factors ;Membrane trafficking ;Exosome ;Legionellosis	GO:0005525	GTP binding
c29666/f1p5/1143	1143	81.8283	Sobic.001G372500.1	UDP-D-glucose/UDP-D-galactose 4-epimerase 2	N/A	N/A	N/A	K01784	Galactose metabolism ;Amino sugar and nucleotide sugar metabolism	N/A	N/A
c34907/f1p0/757	757	81.7304	Zm00008a019829_T01	RNA polymerase Rpb6	KOG3405	RNA polymerase subunit K	K	K03014	Purine metabolism ;Pyrimidine metabolism ;RNA polymerase ;Transcription machinery ;DNA repair and recombination proteins ;Cytosolic DNA-sensing pathway ;Huntington's disease ;Epstein-Barr virus infection	GO:0006351,GO:0003899,GO:0003677	transcription, DNA-templated;DNA-directed 5'-3' RNA polymerase activity;DNA binding
c39880/f7p15/1541	1541	81.6107	Sobic.005G231500.1	rubisco activase	KOG0651	26S proteasome regulatory complex, ATPase RPT4	O	N/A	N/A	GO:0005524	ATP binding
c21660/f2p0/926	926	81.5244	Pavir.Ia00741.1	N/A	N/A	N/A	N/A	N/A	N/A	N/A	N/A
c12355/f4p3/1063	1064	81.5152	Sobic.003G279200.1	NADH-ubiquinone oxidoreductase 20 kDa subunit, mitochondrial	KOG1687	NADH-ubiquinone oxidoreductase, NUFS7/PSST/20 kDa subunit	C	K03940	Oxidative phosphorylation ;Retrograde endocannabinoid signaling ;Alzheimer's disease ;Parkinson's disease ;Huntington's disease ;Non-alcoholic fatty liver disease (NAFLD)	GO:0055114,GO:0051536	oxidation-reduction process;iron-sulfur cluster binding
c47375/f1p1/2256	2260	81.5	Sobic.009G132900.3	pyruvate orthophosphate dikinase	N/A	N/A	N/A	K01006	Pyruvate metabolism ;Carbon fixation in photosynthetic organisms ;Carbon fixation pathways in prokaryotes	GO:0016772,GO:0016310,GO:0016301,GO:0005524,GO:0050242,GO:0006090	transferase activity, transferring phosphorus-containing groups;phosphorylation;kinase activity;ATP binding;pyruvate, phosphate dikinase activity;pyruvate metabolic process
c9984/f3p6/1350	1350	81.4872	Sobic.010G134700.1	FKBP-type peptidyl-prolyl cis-trans isomerase family protein	KOG0543	FKBP-type peptidyl-prolyl cis-trans isomerase	O	K09571	Chaperones and folding catalysts ;Estrogen signaling pathway	GO:0006457	protein folding
c14792/f7p4/2099	2099	81.4069	Sobic.008G064700.1	galactose-1-phosphate guanylyltransferase (GDP)s;GDP-D-glucose phosphorylases;quercetin 4\'-O-glucosyltransferases	KOG2720	Predicted hydrolase (HIT family)	R	K14190	Ascorbate and aldarate metabolism	GO:0080048	GDP-D-glucose phosphorylase activity
c4428/f3p1/1158	1158	81.3514	Sobic.008G029300.2	N/A	N/A	N/A	N/A	N/A	N/A	N/A	N/A
c23308/f1p0/893	892	81.3361	Sobic.008G103900.1	glycine-rich RNA-binding protein 3	N/A	N/A	N/A	K12741	Spliceosome ;Spliceosome ;Messenger RNA Biogenesis	GO:0003676	nucleic acid binding
c19555/f1p5/1273	1275	81.3055	Sobic.007G034300.2	N/A	N/A	N/A	N/A	N/A	N/A	N/A	N/A
c34267/f1p3/2837	2836	81.2385	Sobic.010G160700.1	phosphoenolpyruvate carboxylase 2	N/A	N/A	N/A	K01595	Pyruvate metabolism ;Carbon fixation in photosynthetic organisms ;Carbon fixation pathways in prokaryotes ;Methane metabolism	GO:0015977,GO:0008964,GO:0006099	carbon fixation;phosphoenolpyruvate carboxylase activity;tricarboxylic acid cycle
c7231/f2p0/1043	1043	81.1097	Sobic.001G483100.1	proteasome alpha subunit A1	KOG0182	20S proteasome, regulatory subunit alpha type PSMA6/SCL1	O	K02730	Peptidases ;Proteasome ;Proteasome	GO:0019773,GO:0006511,GO:0004175,GO:0051603,GO:0005839,GO:0004298	proteasome core complex, alpha-subunit complex;ubiquitin-dependent protein catabolic process;endopeptidase activity;proteolysis involved in cellular protein catabolic process;proteasome core complex;threonine-type endopeptidase activity
c32371/f6p8/2612	2612	81.0488	Sobic.004G078600.2	lipoxygenase 2	N/A	N/A	N/A	N/A	N/A	GO:0005515,GO:0055114,GO:0046872,GO:0016702	protein binding;oxidation-reduction process;metal ion binding;oxidoreductase activity, acting on single donors with incorporation of molecular oxygen, incorporation of two atoms of oxygen
c735/f10p8/1206	1207	81.0325	Sobic.005G004500.1	ferritin 4	KOG2332	Ferritin	P	K00522	Exosome ;Ferroptosis ;Necroptosis ;Mineral absorption	GO:0008199,GO:0006879,GO:0006826	ferric iron binding;cellular iron ion homeostasis;iron ion transport
c8676/f1p8/1533	1532	80.9484	Sobic.003G367300.1	actin 7	N/A	N/A	N/A	K10355	Cytoskeleton proteins	N/A	N/A
c14289/f3p3/1775	1776	80.9442	Sobic.004G273300.1	polyubiquitin 10	KOG0001,KOG0005	Ubiquitin and ubiquitin-like proteins;Ubiquitin and ubiquitin-like proteins;Ubiquitin-like protein;Ubiquitin-like protein	O;R;O;D	K08770	Ubiquitin system ;PPAR signaling pathway	N/A	N/A
c31818/f1p0/912	912	80.8505	Sobic.001G383900.1	N/A	N/A	N/A	N/A	N/A	N/A	N/A	N/A
c25012/f1p1/982	982	80.5915	Sobic.005G111200.1	Octicosapeptide/Phox/Bem1p family protein	N/A	N/A	N/A	N/A	N/A	GO:0005515	protein binding
c37565/f1p0/723	723	80.5324	Sobic.001G219300.1	Lactate/malate dehydrogenase family protein	N/A	N/A	N/A	K00025	Citrate cycle (TCA cycle) ;Pyruvate metabolism ;Glyoxylate and dicarboxylate metabolism ;Carbon fixation in photosynthetic organisms ;Cysteine and methionine metabolism ;Proximal tubule bicarbonate reclamation	GO:0055114,GO:0016491,GO:0016616,GO:0016615,GO:0006108	oxidation-reduction process;oxidoreductase activity;oxidoreductase activity, acting on the CH-OH group of donors, NAD or NADP as acceptor;malate dehydrogenase activity;malate metabolic process
c19783/f1p27/1999	1999	80.3551	Sobic.009G163900.1	heat shock protein 70	N/A	N/A	N/A	K03283	Protein phosphatase and associated proteins ;Spliceosome ;Spliceosome ;Ribosome biogenesis ;Mitochondrial biogenesis ;Chaperones and folding catalysts ;Protein processing in endoplasmic reticulum ;Membrane trafficking ;Proteasome ;MAPK signaling pathway ;Cell adhesion molecules and their ligands ;Endocytosis ;Exosome ;Antigen processing and presentation ;Estrogen signaling pathway ;Longevity regu…	N/A	N/A
c35573/f1p5/1105	1105	80.1674	Sobic.008G173000.1	Transketolase family protein	N/A	N/A	N/A	K00162	Glycolysis / Gluconeogenesis ;Citrate cycle (TCA cycle) ;Pyruvate metabolism ;HIF-1 signaling pathway ;Glucagon signaling pathway ;Central carbon metabolism in cancer	GO:0008152,GO:0003824	metabolic process;catalytic activity
c27718/f1p5/1182	1182	80.1359	Sobic.004G353100.1	Glucose-6-phosphate/phosphate translocator-related	KOG1441	Glucose-6-phosphate/phosphate and phosphoenolpyruvate/phosphate antiporter;Glucose-6-phosphate/phosphate and phosphoenolpyruvate/phosphate antiporter	E;G	K15283	Transporters	N/A	N/A
c32811/f1p8/1067	1067	80.0065	Sobic.004G269800.1	gamma-tocopherol methyltransferase	KOG1269	SAM-dependent methyltransferases;SAM-dependent methyltransferases	I;R	K05928	Ubiquinone and other terpenoid-quinone biosynthesis	GO:0008168,GO:0008152	methyltransferase activity;metabolic process
c15797/f2p9/1337	1337	79.9183	Sobic.007G166200.3	lactate/malate dehydrogenase family protein	KOG1496	Malate dehydrogenase	C	K00051	Pyruvate metabolism ;Carbon fixation in photosynthetic organisms	GO:0055114,GO:0016491,GO:0016616,GO:0016615,GO:0006108	oxidation-reduction process;oxidoreductase activity;oxidoreductase activity, acting on the CH-OH group of donors, NAD or NADP as acceptor;malate dehydrogenase activity;malate metabolic process
c30514/f1p13/1358	1358	79.8827	Sobic.003G387100.1	plastid transcriptionally active 4	N/A	N/A	N/A	K03969	Others	N/A	N/A
c28860/f1p2/3319	3323	79.8694	Sobic.010G160700.1	phosphoenolpyruvate carboxylase 2	N/A	N/A	N/A	K01595	Pyruvate metabolism ;Carbon fixation in photosynthetic organisms ;Carbon fixation pathways in prokaryotes ;Methane metabolism	GO:0015977,GO:0008964,GO:0006099	carbon fixation;phosphoenolpyruvate carboxylase activity;tricarboxylic acid cycle
c19158/f2p3/2141	2141	79.8305	Pavir.Eb00696.1	N/A	N/A	N/A	N/A	N/A	N/A	N/A	N/A
c12246/f1p0/1386	1386	79.7699	Sobic.001G370600.3	dehydration-induced protein (ERD15)	N/A	N/A	N/A	N/A	N/A	N/A	N/A
c2401/f3p6/1151	1152	79.3579	Sobic.007G101500.3	ADP glucose pyrophosphorylase 1	KOG1322	GDP-mannose pyrophosphorylase/mannose-1-phosphate guanylyltransferase	M	K00975	Starch and sucrose metabolism ;Amino sugar and nucleotide sugar metabolism ;Biofilm formation - Escherichia coli	GO:0016779,GO:0009058	nucleotidyltransferase activity;biosynthetic process
c22258/f1p2/1501	1501	79.3345	Sobic.005G179300.1	general control non-repressible 5	N/A	N/A	N/A	N/A	N/A	GO:0016887,GO:0005524	ATPase activity;ATP binding
c38478/f1p3/1364	1365	79.3298	Sobic.009G194500.2	N/A	N/A	N/A	N/A	N/A	N/A	N/A	N/A
c2382/f9p2/1156	1169	79.3286	Sobic.010G251000.1	RUB1 conjugating enzyme 1	KOG0420	Ubiquitin-protein ligase	O	K10579	Ubiquitin mediated proteolysis ;Ubiquitin system	N/A	N/A
c28391/f1p0/784	784	79.3179	Sobic.004G249800.2	N/A	N/A	N/A	N/A	N/A	N/A	N/A	N/A
c32141/f1p0/756	756	79.2749	Sobic.010G150800.1	N/A	N/A	N/A	N/A	N/A	N/A	N/A	N/A
c14178/f2p3/1188	1189	79.2209	Sobic.010G223600.1	polyubiquitin 10	KOG0001	Ubiquitin and ubiquitin-like proteins;Ubiquitin and ubiquitin-like proteins	O;R	K08770	Ubiquitin system ;PPAR signaling pathway	N/A	N/A
c3296/f1p0/992	992	79.1422	Sobic.002G387200.2	SC35-like splicing factor 30A	KOG4207	Predicted splicing factor, SR protein superfamily	A	K12900	Protein phosphatase and associated proteins ;Spliceosome ;Spliceosome	GO:0003676	nucleic acid binding
c3894/f2p4/1754	1754	79.1176	Sobic.003G139500.1	CBL-interacting protein kinase 1	KOG0583	Serine/threonine protein kinase	T	K07198	Protein kinases ;Mitochondrial biogenesis ;Membrane trafficking ;Apelin signaling pathway ;FoxO signaling pathway ;PI3K-Akt signaling pathway ;AMPK signaling pathway ;mTOR signaling pathway ;Autophagy - animal ;Tight junction ;Insulin signaling pathway ;Glucagon signaling pathway ;Adipocytokine signaling pathway ;Oxytocin signaling pathway ;Longevity regulating pathway - mammal ;Longevity regulat…	GO:0007165,GO:0006468,GO:0005524,GO:0004672	signal transduction;protein phosphorylation;ATP binding;protein kinase activity
c3715/f2p0/902	901	79.0711	GRMZM2G132978_T01	N/A	N/A	N/A	N/A	N/A	N/A	N/A	N/A
c10111/f3p9/1288	1288	78.9895	Sobic.002G330500.1	isopentenyl pyrophosphate:dimethylallyl pyrophosphate isomerase 2	KOG0142	Isopentenyl pyrophosphate:dimethylallyl pyrophosphate isomerase	Q	K01823	Terpenoid backbone biosynthesis	GO:0016787,GO:0008299,GO:0004452	hydrolase activity;isoprenoid biosynthetic process;isopentenyl-diphosphate delta-isomerase activity
c9036/f2p2/968	968	78.9247	Zm00008a038566_T01	Ribosomal protein L30/L7 family protein	KOG3184	60S ribosomal protein L7	J	K02937	Ribosome ;Ribosome	N/A	N/A
c8150/f1p1/876	876	78.8718	Sobic.005G101300.1	Chaperone DnaJ-domain superfamily protein	N/A	N/A	N/A	N/A	N/A	N/A	N/A
c31654/f1p11/1169	1169	78.7924	Sobic.002G030900.1	NAD(P)-linked oxidoreductase superfamily protein	KOG1575	Voltage-gated shaker-like K+ channel, subunit beta/KCNAB	C	N/A	N/A	N/A	N/A
c9456/f2p0/971	972	78.7309	Zm00008a028322_T01	glutathione S-transferase tau 7	KOG0406	Glutathione S-transferase	O	K00799	Glutathione metabolism ;Metabolism of xenobiotics by cytochrome P450 ;Drug metabolism - cytochrome P450 ;Transporters ;Pathways in cancer ;Chemical carcinogenesis ;Hepatocellular carcinoma ;Fluid shear stress and atherosclerosis ;Platinum drug resistance	GO:0005515	protein binding
c3923/f4p6/936	936	78.6496	Sobic.003G305700.1	Glutathione S-transferase family protein	KOG0867	Glutathione S-transferase	O	K00799	Glutathione metabolism ;Metabolism of xenobiotics by cytochrome P450 ;Drug metabolism - cytochrome P450 ;Transporters ;Pathways in cancer ;Chemical carcinogenesis ;Hepatocellular carcinoma ;Fluid shear stress and atherosclerosis ;Platinum drug resistance	GO:0005515	protein binding
c20603/f2p8/2194	2194	78.5465	Sobic.007G216300.1	HEAT SHOCK PROTEIN 81.4	N/A	N/A	N/A	K04079	Protein phosphatase and associated proteins ;Mitochondrial biogenesis ;Chaperones and folding catalysts ;Protein processing in endoplasmic reticulum ;Membrane trafficking ;Proteasome ;PI3K-Akt signaling pathway ;Exosome ;Necroptosis ;NOD-like receptor signaling pathway ;Antigen processing and presentation ;Th17 cell differentiation ;IL-17 signaling pathway ;Estrogen signaling pathway ;Progesteron…	GO:0051082,GO:0006950,GO:0006457,GO:0005524	unfolded protein binding;response to stress;protein folding;ATP binding
c24762/f3p7/1370	1370	78.3273	Sobic.009G239900.1	ketol-acid reductoisomerase	N/A	N/A	N/A	K00053	Valine;Pantothenate and CoA biosynthesis	GO:0055114,GO:0009082,GO:0004455,GO:0016491	oxidation-reduction process;branched-chain amino acid biosynthetic process;ketol-acid reductoisomerase activity;oxidoreductase activity
c20682/f1p2/2642	2642	78.3168	Sobic.006G264900.1	magnesium-chelatase subunit chlH, chloroplast, putative / Mg-protoporphyrin IX chelatase, putative (CHLH)	N/A	N/A	N/A	K03403	Porphyrin and chlorophyll metabolism	GO:0016851,GO:0009058	magnesium chelatase activity;biosynthetic process
c13771/f4p6/1590	1590	78.1785	Sobic.005G231500.1	rubisco activase	KOG0651	26S proteasome regulatory complex, ATPase RPT4	O	N/A	N/A	GO:0005524	ATP binding
c15412/f1p0/1012	1011	78.1609	N/A	N/A	N/A	N/A	N/A	N/A	N/A	N/A	N/A
c24267/f24p10/1230	1230	78.0779	Sobic.003G380200.1	SNARE associated Golgi protein family	N/A	N/A	N/A	N/A	N/A	GO:0016021	integral component of membrane
c9031/f2p2/1185	1185	78.0708	Sobic.006G234100.1	Glutamyl-tRNA reductase family protein	N/A	N/A	N/A	K02492	Porphyrin and chlorophyll metabolism	GO:0055114,GO:0050661,GO:0033014,GO:0008883	oxidation-reduction process;NADP binding;tetrapyrrole biosynthetic process;glutamyl-tRNA reductase activity
c13719/f3p47/1144	1144	78.0376	Sobic.002G352100.1	photosystem I light harvesting complex gene 2	N/A	N/A	N/A	K08908	Photosynthesis - antenna proteins ;Photosynthesis proteins	GO:0016020,GO:0009765	membrane;photosynthesis, light harvesting
c17065/f2p0/1171	1171	78.0184	Sobic.005G231500.1	rubisco activase	KOG0651	26S proteasome regulatory complex, ATPase RPT4	O	N/A	N/A	GO:0005524	ATP binding
c45790/f1p1/2076	2076	77.997	Sobic.010G160700.1	phosphoenolpyruvate carboxylase 2	N/A	N/A	N/A	K01595	Pyruvate metabolism ;Carbon fixation in photosynthetic organisms ;Carbon fixation pathways in prokaryotes ;Methane metabolism	GO:0015977,GO:0008964,GO:0006099	carbon fixation;phosphoenolpyruvate carboxylase activity;tricarboxylic acid cycle
c18570/f1p7/1593	1594	77.8631	Sobic.003G359100.1	sedoheptulose-bisphosphatase	KOG1458	Fructose-1,6-bisphosphatase	G	K01100	Carbon fixation in photosynthetic organisms	GO:0042578,GO:0042132,GO:0005975	phosphoric ester hydrolase activity;fructose 1,6-bisphosphate 1-phosphatase activity;carbohydrate metabolic process
c21870/f1p1/1450	1450	77.7902	Sobic.003G243600.1	ubiquitin conjugating enzyme 9	KOG0417	Ubiquitin-protein ligase	O	K06689	Protein processing in endoplasmic reticulum ;Ubiquitin mediated proteolysis ;Ubiquitin system ;MAPK signaling pathway - fly ;Toll and Imd signaling pathway	N/A	N/A
c37103/f1p2/1338	1340	77.6518	Sobic.007G071500.1	photosystem II subunit R	N/A	N/A	N/A	K03541	Photosynthesis ;Photosynthesis proteins	GO:0042651,GO:0015979,GO:0009654,GO:0009523	thylakoid membrane;photosynthesis;photosystem II oxygen evolving complex;photosystem II
c24472/f3p0/839	839	77.6271	Sobic.001G411300.1	Ribosomal protein L10 family protein	N/A	N/A	N/A	K02864	Ribosome ;Ribosome	GO:0042254,GO:0005622	ribosome biogenesis;intracellular
c10964/f3p2/1095	1095	77.5215	Sobic.009G104000.1	RAN binding protein 1	KOG0864	Ran-binding protein RANBP1 and related RanBD domain proteins	U	K15306	Viral carcinogenesis ;HTLV-I infection	GO:0046907	intracellular transport
c17742/f1p1/1020	1022	77.5052	Sobic.009G164100.2	ubiquitin carrier protein 7	KOG0425	Ubiquitin-protein ligase	O	K10575	Protein processing in endoplasmic reticulum ;Ubiquitin mediated proteolysis ;Ubiquitin system ;Parkinson's disease	N/A	N/A
c34495/f8p11/1191	1192	77.4885	Sobic.010G000300.1	BAX inhibitor 1	KOG1629	Bax-mediated apoptosis inhibitor TEGT/BI-1	V	N/A	N/A	N/A	N/A
c35051/f1p8/1134	1136	77.3876	Sobic.001G219300.1	Lactate/malate dehydrogenase family protein	N/A	N/A	N/A	K00025	Citrate cycle (TCA cycle) ;Pyruvate metabolism ;Glyoxylate and dicarboxylate metabolism ;Carbon fixation in photosynthetic organisms ;Cysteine and methionine metabolism ;Proximal tubule bicarbonate reclamation	GO:0055114,GO:0016491,GO:0016616,GO:0016615,GO:0006108	oxidation-reduction process;oxidoreductase activity;oxidoreductase activity, acting on the CH-OH group of donors, NAD or NADP as acceptor;malate dehydrogenase activity;malate metabolic process
c11127/f8p14/2186	2186	77.3503	Sobic.003G435800.1	Pheophorbide a oxygenase family protein with Rieske [2Fe-2S] domain	N/A	N/A	N/A	K13600	Porphyrin and chlorophyll metabolism	GO:0055114,GO:0010277,GO:0051537,GO:0016491	oxidation-reduction process;chlorophyllide a oxygenase [overall] activity;2 iron, 2 sulfur cluster binding;oxidoreductase activity
c2618/f1p0/807	807	77.3292	Sobic.009G246400.1	solanesyl diphosphate synthase 2	KOG0776	Geranylgeranyl pyrophosphate synthase/Polyprenyl synthetase	H	K05356	Prenyltransferases ;Terpenoid backbone biosynthesis	GO:0008299,GO:0016765,GO:0015979	isoprenoid biosynthetic process;transferase activity, transferring alkyl or aryl (other than methyl) groups;photosynthesis
c5621/f2p0/1477	1477	77.322	Sobic.003G052300.1	Raffinose synthase family protein	N/A	N/A	N/A	K06617	Galactose metabolism	N/A	N/A
c24307/f39p37/1418	1417	77.2847	Sobic.005G063000.1	NAD(P)-binding Rossmann-fold superfamily protein	KOG1208	Dehydrogenases with different specificities (related to short-chain alcohol dehydrogenases)	Q	N/A	N/A	N/A	N/A
c55/f23p34/1088	1087	77.2654	Sobic.002G030200.1	photosystem II subunit P-1	N/A	N/A	N/A	K02717	Photosynthesis ;Photosynthesis proteins	GO:0019898,GO:0015979,GO:0009654,GO:0009523,GO:0005509	extrinsic component of membrane;photosynthesis;photosystem II oxygen evolving complex;photosystem II;calcium ion binding
c15375/f1p16/967	967	77.221	Sobic.010G232100.5	polyubiquitin 10	KOG0005,KOG0001	Ubiquitin-like protein;Ubiquitin-like protein;Ubiquitin and ubiquitin-like proteins;Ubiquitin and ubiquitin-like proteins	O;D;O;R	K08770,K04551	Ubiquitin system ;PPAR signaling pathway ;Ubiquitin system ;Endocytosis ;Exosome ;Mitophagy - animal ;Parkinson's disease ;Kaposi's sarcoma-associated herpesvirus infection	N/A	N/A
c9473/f1p0/1138	1138	77.1869	Sobic.004G063200.1	CONSTANS-like 4	N/A	N/A	N/A	N/A	N/A	GO:0008270,GO:0005622,GO:0005515	zinc ion binding;intracellular;protein binding
c39638/f3p11/1156	1156	77.1665	Sobic.004G311100.1	pyrophosphorylase 6	KOG1626	Inorganic pyrophosphatase/Nucleosome remodeling factor, subunit NURF38	C	K01507	Oxidative phosphorylation	GO:0006796,GO:0005737,GO:0004427,GO:0000287	phosphate-containing compound metabolic process;cytoplasm;inorganic diphosphatase activity;magnesium ion binding
c39107/f1p2/1255	1257	77.123	Sobic.010G160700.1	phosphoenolpyruvate carboxylase 2	N/A	N/A	N/A	K01595	Pyruvate metabolism ;Carbon fixation in photosynthetic organisms ;Carbon fixation pathways in prokaryotes ;Methane metabolism	GO:0015977,GO:0008964,GO:0006099	carbon fixation;phosphoenolpyruvate carboxylase activity;tricarboxylic acid cycle
c12842/f2p2/861	861	77.0672	Sobic.001G426000.1	HSP20-like chaperones superfamily protein	KOG0710	Molecular chaperone (small heat-shock protein Hsp26/Hsp42)	O	K13993	Chaperones and folding catalysts ;Protein processing in endoplasmic reticulum	N/A	N/A
c7326/f3p5/931	934	76.9591	Sobic.008G063100.1	thioredoxin M-type 4	KOG0907	Thioredoxin	O	K03671	Chaperones and folding catalysts ;NOD-like receptor signaling pathway ;Fluid shear stress and atherosclerosis	GO:0045454,GO:0015035,GO:0006662	cell redox homeostasis;protein disulfide oxidoreductase activity;glycerol ether metabolic process
c36931/f1p1/700	700	76.9498	Sobic.007G004700.1	2Fe-2S ferredoxin-like superfamily protein	N/A	N/A	N/A	K02639	Photosynthesis ;Photosynthesis proteins	GO:0051536,GO:0009055	iron-sulfur cluster binding;electron carrier activity
c39633/f14p19/1440	1440	76.7881	Sobic.007G025400.1	glyceraldehyde-3-phosphate dehydrogenase C subunit 1	KOG0657	Glyceraldehyde 3-phosphate dehydrogenase	G	K00134	Glycolysis / Gluconeogenesis ;Carbon fixation in photosynthetic organisms ;Membrane trafficking ;HIF-1 signaling pathway ;Exosome ;Alzheimer's disease	GO:0055114,GO:0016620	oxidation-reduction process;oxidoreductase activity, acting on the aldehyde or oxo group of donors, NAD or NADP as acceptor
c33859/f2p9/2292	2293	76.7804	Sobic.009G201500.1	heat shock protein 101	N/A	N/A	N/A	K03695	Chaperones and folding catalysts ;Longevity regulating pathway - multiple species	GO:0016887,GO:0005524,GO:0019538	ATPase activity;ATP binding;protein metabolic process
c9485/f1p35/1649	1649	76.7645	Sobic.004G272100.1	phosphoribulokinase	N/A	N/A	N/A	K00855	Carbon fixation in photosynthetic organisms	GO:0016301,GO:0008152,GO:0005524	kinase activity;metabolic process;ATP binding
c34140/f45p46/1479	1478	76.7098	Sobic.002G420900.2	hydroxyproline-rich glycoprotein family protein	N/A	N/A	N/A	N/A	N/A	N/A	N/A
c22873/f4p5/1371	1370	76.6627	Sobic.006G214200.1	Pyridoxal phosphate (PLP)-dependent transferases superfamily protein	N/A	N/A	N/A	K16871	Butanoate metabolism ;Alanine	GO:0030170,GO:0008483	pyridoxal phosphate binding;transaminase activity
c6218/f1p4/1465	1465	76.6424	Sobic.006G264900.1	magnesium-chelatase subunit chlH, chloroplast, putative / Mg-protoporphyrin IX chelatase, putative (CHLH)	N/A	N/A	N/A	K03403	Porphyrin and chlorophyll metabolism	GO:0016851,GO:0009058	magnesium chelatase activity;biosynthetic process
c3666/f1p1/809	809	76.5879	Sobic.008G124400.1	Adenine nucleotide alpha hydrolases-like superfamily protein	N/A	N/A	N/A	N/A	N/A	GO:0006950	response to stress
c3338/f1p9/2687	2687	76.4882	Sobic.010G160700.1	phosphoenolpyruvate carboxylase 2	N/A	N/A	N/A	K01595	Pyruvate metabolism ;Carbon fixation in photosynthetic organisms ;Carbon fixation pathways in prokaryotes ;Methane metabolism	GO:0015977,GO:0008964,GO:0006099	carbon fixation;phosphoenolpyruvate carboxylase activity;tricarboxylic acid cycle
c26425/f1p2/1006	1006	76.4781	Zm00008a035098_T01	HSP20-like chaperones superfamily protein	KOG3158	HSP90 co-chaperone p23	O	N/A	N/A	N/A	N/A
c28900/f1p3/2054	2058	76.4712	Sobic.001G283100.2	membrane protein, putative	N/A	N/A	N/A	N/A	N/A	N/A	N/A
c2966/f1p0/1483	1483	76.46	Sobic.010G207100.1	S-adenosyl-L-methionine-dependent methyltransferases superfamily protein	N/A	N/A	N/A	N/A	N/A	GO:0008168,GO:0008152	methyltransferase activity;metabolic process
c3158/f9p6/1297	1297	76.4202	Sobic.001G426800.2	RNA-binding (RRM/RBD/RNP motifs) family protein	KOG0107,KOG4207	Alternative splicing factor SRp20/9G8 (RRM superfamily);Predicted splicing factor, SR protein superfamily	A;A	N/A	N/A	GO:0003676	nucleic acid binding
c793/f8p15/1801	1800	76.3336	Sobic.003G367300.1	actin 7	N/A	N/A	N/A	K10355	Cytoskeleton proteins	N/A	N/A
c33014/f1p0/991	992	76.2819	GRMZM2G012276_T02	Thioredoxin superfamily protein	KOG0541	Alkyl hydroperoxide reductase/peroxiredoxin	O	K03564	Protein folding and associated processing	GO:0016491	oxidoreductase activity
c32259/f1p2/1367	1367	76.2642	Sobic.001G407600.1	fatty acid desaturase 8	N/A	N/A	N/A	K10257	Lipid biosynthesis proteins	GO:0006629,GO:0055114,GO:0016717	lipid metabolic process;oxidation-reduction process;oxidoreductase activity, acting on paired donors, with oxidation of a pair of donors resulting in the reduction of molecular oxygen to two molecules of water
c38026/f1p0/767	767	76.2209	Sobic.001G083200.1	eukaryotic elongation factor 5A-1	KOG3271	Translation initiation factor 5A (eIF-5A)	J	K03263,K02180	Translation factors ;Spliceosome ;Chromosome and associated proteins ;Cell cycle ;Cell cycle - yeast ;HTLV-I infection	GO:0045905,GO:0045901,GO:0043022,GO:0006452,GO:0003746,GO:0003723	positive regulation of translational termination;positive regulation of translational elongation;ribosome binding;translational frameshifting;translation elongation factor activity;RNA binding
c21276/f2p7/1062	1062	76.1812	Sobic.003G072300.2	triosephosphate isomerase	KOG1643	Triosephosphate isomerase	G	K01803	Glycolysis / Gluconeogenesis ;Fructose and mannose metabolism ;Inositol phosphate metabolism ;Carbon fixation in photosynthetic organisms ;Exosome	GO:0008152,GO:0004807	metabolic process;triose-phosphate isomerase activity
c14190/f2p1/1153	1160	76.0735	Sobic.003G305700.1	Glutathione S-transferase family protein	KOG0867	Glutathione S-transferase	O	K00799	Glutathione metabolism ;Metabolism of xenobiotics by cytochrome P450 ;Drug metabolism - cytochrome P450 ;Transporters ;Pathways in cancer ;Chemical carcinogenesis ;Hepatocellular carcinoma ;Fluid shear stress and atherosclerosis ;Platinum drug resistance	GO:0005515	protein binding
c7390/f1p0/835	836	76.0664	Sobic.009G050300.1	Ribosomal protein L18e/L15 superfamily protein	KOG1714	60s ribosomal protein L18	J	K02883	Ribosome ;Ribosome	GO:0006412,GO:0005840,GO:0005622,GO:0003735	translation;ribosome;intracellular;structural constituent of ribosome
c35334/f1p7/1531	1530	75.9459	Sobic.009G183700.1	Phosphoglycerate kinase family protein	N/A	N/A	N/A	K00927	Glycolysis / Gluconeogenesis ;Carbon fixation in photosynthetic organisms ;Exosome	GO:0006096,GO:0004618	glycolytic process;phosphoglycerate kinase activity
c3698/f4p8/1399	1399	75.9425	Sobic.005G056400.1	fructose-bisphosphate aldolase 2	N/A	N/A	N/A	K01623	Glycolysis / Gluconeogenesis ;Pentose phosphate pathway ;Fructose and mannose metabolism ;Carbon fixation in photosynthetic organisms ;Methane metabolism ;Membrane trafficking ;Chromosome and associated proteins ;Exosome	GO:0006096,GO:0004332	glycolytic process;fructose-bisphosphate aldolase activity
c21153/f1p0/802	802	75.9295	Sobic.010G088600.1	mRNA splicing factor, thioredoxin-like U5 snRNP	KOG3414	Component of the U4/U6.U5 snRNP/mitosis protein DIM1;Component of the U4/U6.U5 snRNP/mitosis protein DIM1	A;D	K12859	Spliceosome ;Spliceosome	GO:0045454,GO:0005681,GO:0000398	cell redox homeostasis;spliceosomal complex;mRNA splicing, via spliceosome
c2420/f5p6/1706	1706	75.8197	Sobic.009G246400.1	solanesyl diphosphate synthase 2	KOG0776	Geranylgeranyl pyrophosphate synthase/Polyprenyl synthetase	H	K05356	Prenyltransferases ;Terpenoid backbone biosynthesis	GO:0008299,GO:0016765,GO:0015979	isoprenoid biosynthetic process;transferase activity, transferring alkyl or aryl (other than methyl) groups;photosynthesis
c7077/f4p13/1634	1634	75.7523	Sobic.009G006100.1	actin 7	N/A	N/A	N/A	K10355	Cytoskeleton proteins	N/A	N/A
c12069/f1p10/2318	2319	75.6416	Sobic.007G216300.1	HEAT SHOCK PROTEIN 81.4	N/A	N/A	N/A	K04079	Protein phosphatase and associated proteins ;Mitochondrial biogenesis ;Chaperones and folding catalysts ;Protein processing in endoplasmic reticulum ;Membrane trafficking ;Proteasome ;PI3K-Akt signaling pathway ;Exosome ;Necroptosis ;NOD-like receptor signaling pathway ;Antigen processing and presentation ;Th17 cell differentiation ;IL-17 signaling pathway ;Estrogen signaling pathway ;Progesteron…	GO:0051082,GO:0006950,GO:0006457,GO:0005524	unfolded protein binding;response to stress;protein folding;ATP binding
c18244/f1p1/975	975	75.5805	Sobic.007G047400.1	Homeodomain-like superfamily protein	N/A	N/A	N/A	K12133	Transcription factors ;Circadian rhythm - plant	N/A	N/A
c16323/f1p11/1292	1292	75.5472	Sobic.010G005500.1	ferredoxin-NADP(+)-oxidoreductase 2	N/A	N/A	N/A	K02641	Photosynthesis ;Photosynthesis proteins	GO:0055114,GO:0016491	oxidation-reduction process;oxidoreductase activity
c23579/f4p8/1360	1360	75.506	Sobic.003G308400.1	N/A	N/A	N/A	N/A	N/A	N/A	N/A	N/A
c39469/f14p6/1284	1284	75.492	Sobic.004G270500.1	alternative oxidase 1A	N/A	N/A	N/A	K17893	Energy metabolism	GO:0055114,GO:0009916	oxidation-reduction process;alternative oxidase activity
c34025/f39p29/1277	1279	75.4762	Sobic.001G329400.1	Protein of unknown function (DUF1230)	N/A	N/A	N/A	N/A	N/A	N/A	N/A
c38324/f1p0/1105	1105	75.4548	Sobic.007G047400.1	Homeodomain-like superfamily protein	N/A	N/A	N/A	K12133	Transcription factors ;Circadian rhythm - plant	N/A	N/A
c29230/f1p1/1155	1160	75.3691	GRMZM2G171648_T01	N/A	N/A	N/A	N/A	N/A	N/A	N/A	N/A
c26308/f1p0/1687	1684	75.2822	GRMZM2G089421_T02	N/A	N/A	N/A	N/A	N/A	N/A	N/A	N/A
c12633/f2p6/1341	1341	75.1854	Sobic.007G025400.1	glyceraldehyde-3-phosphate dehydrogenase C subunit 1	KOG0657	Glyceraldehyde 3-phosphate dehydrogenase	G	K00134	Glycolysis / Gluconeogenesis ;Carbon fixation in photosynthetic organisms ;Membrane trafficking ;HIF-1 signaling pathway ;Exosome ;Alzheimer's disease	GO:0055114,GO:0016620	oxidation-reduction process;oxidoreductase activity, acting on the aldehyde or oxo group of donors, NAD or NADP as acceptor
c40014/f22p22/1358	1358	75.1835	Sobic.005G145201.1	general regulatory factor 2	KOG0841	Multifunctional chaperone (14-3-3 family)	O	K06630	DNA repair and recombination proteins ;MAPK signaling pathway - yeast ;Hippo signaling pathway ;Hippo signaling pathway -fly ;PI3K-Akt signaling pathway ;Exosome ;Cell cycle ;Oocyte meiosis ;Neurotrophin signaling pathway ;Viral carcinogenesis ;Epstein-Barr virus infection	GO:0019904	protein domain specific binding
c26274/f1p1/1235	1235	75.0323	Sobic.005G186500.1	serine carboxypeptidase-like 27	N/A	N/A	N/A	K08249	Cyanoamino acid metabolism	GO:0006508,GO:0004185	proteolysis;serine-type carboxypeptidase activity
c37710/f1p1/1112	1113	75.0136	Sobic.008G051800.1	ATPase, F0/V0 complex, subunit C protein	KOG0232	Vacuolar H+-ATPase V0 sector, subunits c/c'	C	K02155	Oxidative phosphorylation ;Phagosome ;Lysosome ;Collecting duct acid secretion ;Synaptic vesicle cycle ;Rheumatoid arthritis ;Vibrio cholerae infection ;Epithelial cell signaling in Helicobacter pylori infection ;Tuberculosis	GO:0033177,GO:0015991,GO:0015078	proton-transporting two-sector ATPase complex, proton-transporting domain;ATP hydrolysis coupled proton transport;hydrogen ion transmembrane transporter activity
c18071/f1p0/871	839	74.9875	GRMZM5G823826_T01	N/A	N/A	N/A	N/A	N/A	N/A	N/A	N/A
c300/f40p29/1151	1151	74.9652	Sobic.008G033200.2	Aluminium induced protein with YGL and LRDR motifs	N/A	N/A	N/A	N/A	N/A	N/A	N/A
c31655/f2p4/1192	1196	74.9619	Zm00008a026914_T01	Ribose 5-phosphate isomerase, type A protein	KOG3075	Ribose 5-phosphate isomerase	G	K01807	Pentose phosphate pathway ;Carbon fixation in photosynthetic organisms	GO:0009052,GO:0004751	pentose-phosphate shunt, non-oxidative branch;ribose-5-phosphate isomerase activity
c3466/f1p4/981	981	74.9263	Sobic.007G166300.1	lactate/malate dehydrogenase family protein	KOG1496	Malate dehydrogenase	C	K00051	Pyruvate metabolism ;Carbon fixation in photosynthetic organisms	GO:0055114,GO:0016491,GO:0016616,GO:0016615,GO:0006108	oxidation-reduction process;oxidoreductase activity;oxidoreductase activity, acting on the CH-OH group of donors, NAD or NADP as acceptor;malate dehydrogenase activity;malate metabolic process
c23057/f2p3/1605	1606	74.9249	Sobic.010G023700.2	Transketolase	N/A	N/A	N/A	K00615	Pentose phosphate pathway ;Carbon fixation in photosynthetic organisms ;Biosynthesis of ansamycins	GO:0008152,GO:0003824	metabolic process;catalytic activity
c16815/f3p6/1468	1470	74.9043	Sobic.004G267700.2	alpha/beta-Hydrolases superfamily protein	KOG1454	Predicted hydrolase/acyltransferase (alpha/beta hydrolase superfamily)	R	N/A	N/A	N/A	N/A
c18680/f2p1/1031	1036	74.8635	Sobic.007G157300.1	NAD(P)-binding Rossmann-fold superfamily protein	N/A	N/A	N/A	N/A	N/A	N/A	N/A
c14034/f2p1/1619	1619	74.758	Sobic.006G098500.1	RNA-binding protein 47C\'	KOG0148	Apoptosis-promoting RNA-binding protein TIA-1/TIAR (RRM superfamily);Apoptosis-promoting RNA-binding protein TIA-1/TIAR (RRM superfamily)	A;J	N/A	N/A	GO:0003676	nucleic acid binding
c10977/f1p7/1248	1251	74.7551	Sobic.001G070500.1	photosystem I subunit F	N/A	N/A	N/A	K02694	Photosynthesis ;Photosynthesis proteins	GO:0015979,GO:0009538,GO:0009522	photosynthesis;photosystem I reaction center;photosystem I
c2615/f4p6/1905	1905	74.7344	GRMZM2G049349_T01	ethylene-dependent gravitropism-deficient and yellow-green-like 3	N/A	N/A	N/A	N/A	N/A	N/A	N/A
c8696/f1p8/1236	1237	74.5092	Sobic.003G387900.1	ribosomal protein L5 B	KOG0875	60S ribosomal protein L5	J	K02932	Protein phosphatase and associated proteins ;Ribosome ;Ribosome	GO:0006412,GO:0005840,GO:0005622,GO:0003735,GO:0008097	translation;ribosome;intracellular;structural constituent of ribosome;5S rRNA binding
c7443/f1p6/974	975	74.4455	Sobic.006G108400.1	general regulatory factor 7	KOG0841	Multifunctional chaperone (14-3-3 family)	O	K06630	DNA repair and recombination proteins ;MAPK signaling pathway - yeast ;Hippo signaling pathway ;Hippo signaling pathway -fly ;PI3K-Akt signaling pathway ;Exosome ;Cell cycle ;Oocyte meiosis ;Neurotrophin signaling pathway ;Viral carcinogenesis ;Epstein-Barr virus infection	GO:0019904	protein domain specific binding
c11338/f1p0/988	988	74.2137	Sobic.005G133900.1	N/A	N/A	N/A	N/A	N/A	N/A	N/A	N/A
c17012/f1p3/1171	1171	74.1872	Sobic.008G065000.1	Mog1/PsbP/DUF1795-like photosystem II reaction center PsbP family protein	N/A	N/A	N/A	N/A	N/A	GO:0019898,GO:0015979,GO:0009654,GO:0009523,GO:0005509	extrinsic component of membrane;photosynthesis;photosystem II oxygen evolving complex;photosystem II;calcium ion binding
c16522/f2p9/1836	1837	74.172	Sobic.001G104900.1	ethylene-dependent gravitropism-deficient and yellow-green-like 3	N/A	N/A	N/A	N/A	N/A	N/A	N/A
c15704/f1p0/915	914	74.0767	Sobic.006G116700.1	Ribosomal protein L6 family protein	KOG1694	60s ribosomal protein L6	J	K02934	Ribosome ;Ribosome	GO:0006412,GO:0005840,GO:0005622,GO:0003735	translation;ribosome;intracellular;structural constituent of ribosome
c7362/f6p4/1442	1442	73.9627	GRMZM2G015295_T01	S-adenosyl-L-homocysteine hydrolase	N/A	N/A	N/A	K01251	Cysteine and methionine metabolism ;Protein phosphatase and associated proteins ;Exosome	GO:0055114,GO:0051287,GO:0006730,GO:0004013	oxidation-reduction process;NAD binding;one-carbon metabolic process;adenosylhomocysteinase activity
c47467/f1p0/338	338	73.8926	Sobic.003G301000.1	SGS domain-containing protein	KOG3260	Calcyclin-binding protein CacyBP	T	K04507	Wnt signaling pathway	N/A	N/A
c10467/f4p0/1226	1226	73.8771	Sobic.007G062500.1	Uncharacterised conserved protein (UCP012943)	N/A	N/A	N/A	N/A	N/A	N/A	N/A
c19898/f7p5/1862	1862	73.7686	Bradi1g00410.1	N/A	N/A	N/A	N/A	N/A	N/A	N/A	N/A
c26104/f1p9/1750	1750	73.7344	Sobic.010G223200.1	FtsH extracellular protease family	N/A	N/A	N/A	K03798	Peptidases ;Chaperones and folding catalysts	GO:0016887,GO:0005524,GO:0006508,GO:0004222	ATPase activity;ATP binding;proteolysis;metalloendopeptidase activity
c1355/f7p3/1334	1335	73.6962	Sobic.004G267700.2	alpha/beta-Hydrolases superfamily protein	KOG1454	Predicted hydrolase/acyltransferase (alpha/beta hydrolase superfamily)	R	N/A	N/A	N/A	N/A
c40072/f10p11/1230	1230	73.6716	Sobic.001G077300.1	Thioredoxin superfamily protein	KOG0907	Thioredoxin	O	N/A	N/A	GO:0045454,GO:0015035,GO:0006662	cell redox homeostasis;protein disulfide oxidoreductase activity;glycerol ether metabolic process
c34690/f1p6/1422	1422	73.6607	Sobic.001G118100.1	B-box type zinc finger protein with CCT domain	N/A	N/A	N/A	N/A	N/A	GO:0008270,GO:0005622,GO:0005515	zinc ion binding;intracellular;protein binding
c32848/f2p3/1292	1292	73.5633	Sobic.002G006600.2	alanine-2-oxoglutarate aminotransferase 2	N/A	N/A	N/A	N/A	N/A	GO:0030170,GO:0009058	pyridoxal phosphate binding;biosynthetic process
c493/f50p14/1377	1377	73.5569	Sobic.004G238100.1	NOD26-like intrinsic protein 4;2	KOG0223	Aquaporin (major intrinsic protein family)	G	K09874	Transporters	GO:0016020,GO:0006810,GO:0005215	membrane;transport;transporter activity
c29472/f1p0/746	751	73.5338	Sobic.009G210200.2	Acid phosphatase/vanadium-dependent haloperoxidase-related protein	N/A	N/A	N/A	N/A	N/A	N/A	N/A
c15942/f1p0/918	918	73.4854	Sobic.006G124900.1	MA3 domain-containing protein	N/A	N/A	N/A	N/A	N/A	N/A	N/A
c10572/f2p13/2062	2060	73.4427	Pavir.Ga01281.1	Adenosylmethionine decarboxylase family protein	KOG0788	S-adenosylmethionine decarboxylase	T	K01611	Cysteine and methionine metabolism ;Arginine and proline metabolism	GO:0008295,GO:0006597,GO:0004014	spermidine biosynthetic process;spermine biosynthetic process;adenosylmethionine decarboxylase activity
c4216/f1p4/1525	1525	73.3474	Sobic.004G202200.1	RAB GTPase homolog E1B	N/A	N/A	N/A	K02358	Mitochondrial biogenesis ;Translation factors ;Exosome	GO:0005525	GTP binding
c25192/f1p0/1042	1042	73.2605	GRMZM2G169890_T04	copper/zinc superoxide dismutase 1	N/A	N/A	N/A	N/A	N/A	GO:0055114,GO:0046872,GO:0006801	oxidation-reduction process;metal ion binding;superoxide metabolic process
c22436/f2p1/1082	1083	73.2377	Sobic.001G415400.1	PsbP-like protein 2	N/A	N/A	N/A	N/A	N/A	GO:0019898,GO:0015979,GO:0009654,GO:0009523,GO:0005509	extrinsic component of membrane;photosynthesis;photosystem II oxygen evolving complex;photosystem II;calcium ion binding
c36394/f1p0/903	904	73.0477	GRMZM2G117439_T01	Protein of unknown function, DUF538	N/A	N/A	N/A	N/A	N/A	N/A	N/A
c20371/f1p11/4791	4790	72.9634	Sobic.010G160700.1	phosphoenolpyruvate carboxylase 2	N/A	N/A	N/A	K01595	Pyruvate metabolism ;Carbon fixation in photosynthetic organisms ;Carbon fixation pathways in prokaryotes ;Methane metabolism	GO:0015977,GO:0008964,GO:0006099	carbon fixation;phosphoenolpyruvate carboxylase activity;tricarboxylic acid cycle
c12914/f4p6/1427	1427	72.8728	Sobic.006G161500.1	Translation elongation factor EFG/EF2 protein	N/A	N/A	N/A	K02355	Mitochondrial biogenesis ;Translation factors	GO:0005525	GTP binding
c32293/f1p0/862	862	72.8465	Sobic.001G396300.1	CP12 domain-containing protein 1	N/A	N/A	N/A	N/A	N/A	N/A	N/A
c10253/f4p37/1206	1206	72.789	Sobic.002G288300.1	photosystem II light harvesting complex gene B1B2	N/A	N/A	N/A	K08912	Photosynthesis - antenna proteins ;Photosynthesis proteins	GO:0016020,GO:0009765	membrane;photosynthesis, light harvesting
c27555/f1p0/966	967	72.75	Sobic.001G417000.3	Histone superfamily protein	KOG1744	Histone H2B	B	K11252	Chromosome and associated proteins ;Exosome ;Viral carcinogenesis ;Systemic lupus erythematosus ;Alcoholism	GO:0003677,GO:0000786	DNA binding;nucleosome
c1374/f6p0/971	971	72.6534	Sobic.002G405600.1	dehydration-induced protein (ERD15)	N/A	N/A	N/A	N/A	N/A	N/A	N/A
c14455/f1p1/885	886	72.6486	Sobic.008G094000.1	homolog of Medicago truncatula MTN3	KOG1623	Multitransmembrane protein	R	K15382	Transporters	N/A	N/A
c14321/f4p8/1224	1224	72.6297	Sobic.001G283100.2	membrane protein, putative	N/A	N/A	N/A	N/A	N/A	N/A	N/A
c13508/f5p45/1378	1382	72.6035	Zm00008a040408_T01	photosystem I light harvesting complex gene 3	N/A	N/A	N/A	K08909	Photosynthesis - antenna proteins ;Photosynthesis proteins	GO:0016020,GO:0009765	membrane;photosynthesis, light harvesting
c17451/f1p2/1253	1258	72.5801	GRMZM2G152041_T02	N/A	N/A	N/A	N/A	N/A	N/A	N/A	N/A
c13189/f1p2/1353	1348	72.5018	Sobic.010G232100.1	polyubiquitin 10	KOG0001	Ubiquitin and ubiquitin-like proteins;Ubiquitin and ubiquitin-like proteins	O;R	K08770	Ubiquitin system ;PPAR signaling pathway	N/A	N/A
c17653/f1p3/2226	2227	72.4799	Sobic.010G160700.1	phosphoenolpyruvate carboxylase 2	N/A	N/A	N/A	K01595	Pyruvate metabolism ;Carbon fixation in photosynthetic organisms ;Carbon fixation pathways in prokaryotes ;Methane metabolism	GO:0015977,GO:0008964,GO:0006099	carbon fixation;phosphoenolpyruvate carboxylase activity;tricarboxylic acid cycle
c28498/f1p6/1403	1403	72.3835	Sobic.003G277800.1	Pyridoxal phosphate (PLP)-dependent transferases superfamily protein	N/A	N/A	N/A	N/A	N/A	GO:0016846	carbon-sulfur lyase activity
c7744/f2p2/1161	1161	72.368	Sobic.007G198100.1	Auxin-responsive family protein	KOG4293	Predicted membrane protein, contains DoH and Cytochrome b-561/ferric reductase transmembrane domains	T	N/A	N/A	GO:0016021	integral component of membrane
c4007/f1p2/5939	5943	72.3612	LOC_Os09g00999.1	N/A	N/A	N/A	N/A	N/A	N/A	N/A	N/A
c32063/f1p2/2957	2958	72.358	Sobic.009G132900.3	pyruvate orthophosphate dikinase	N/A	N/A	N/A	K01006	Pyruvate metabolism ;Carbon fixation in photosynthetic organisms ;Carbon fixation pathways in prokaryotes	GO:0016772,GO:0016310,GO:0016301,GO:0005524,GO:0050242,GO:0006090	transferase activity, transferring phosphorus-containing groups;phosphorylation;kinase activity;ATP binding;pyruvate, phosphate dikinase activity;pyruvate metabolic process
c24321/f96p61/1099	1099	72.3497	Sobic.002G288300.1	photosystem II light harvesting complex gene B1B2	N/A	N/A	N/A	K08912	Photosynthesis - antenna proteins ;Photosynthesis proteins	GO:0016020,GO:0009765	membrane;photosynthesis, light harvesting
c28953/f1p0/875	888	72.278	Sobic.004G017800.2	ubiquitin-conjugating enzyme 28	KOG0417	Ubiquitin-protein ligase	O	K06689	Protein processing in endoplasmic reticulum ;Ubiquitin mediated proteolysis ;Ubiquitin system ;MAPK signaling pathway - fly ;Toll and Imd signaling pathway	N/A	N/A
c34587/f1p0/723	728	72.2704	Sobic.009G043000.1	thioredoxin F2	KOG0907	Thioredoxin	O	N/A	N/A	GO:0045454,GO:0015035,GO:0006662	cell redox homeostasis;protein disulfide oxidoreductase activity;glycerol ether metabolic process
c12037/f1p0/694	694	72.2338	Sobic.007G212600.1	ribosomal protein S15A	KOG1754	40S ribosomal protein S15/S22	J	K02957	Ribosome ;Ribosome	GO:0006412,GO:0005840,GO:0003735	translation;ribosome;structural constituent of ribosome
c23624/f3p2/1329	1330	72.1746	Sobic.004G255600.1	cytosolic invertase 2	N/A	N/A	N/A	N/A	N/A	GO:0033926	glycopeptide alpha-N-acetylgalactosaminidase activity
c31444/f1p4/796	796	72.0747	Sobic.004G182900.1	alfin-like 3	KOG1632	Uncharacterized PHD Zn-finger protein	R	N/A	N/A	GO:0005515,GO:0042393,GO:0006355	protein binding;histone binding;regulation of transcription, DNA-templated
c20569/f1p1/805	805	71.9689	Sobic.009G132900.3	pyruvate orthophosphate dikinase	N/A	N/A	N/A	K01006	Pyruvate metabolism ;Carbon fixation in photosynthetic organisms ;Carbon fixation pathways in prokaryotes	GO:0016772,GO:0016310,GO:0016301,GO:0005524,GO:0050242,GO:0006090	transferase activity, transferring phosphorus-containing groups;phosphorylation;kinase activity;ATP binding;pyruvate, phosphate dikinase activity;pyruvate metabolic process
c12333/f1p9/1406	1406	71.9395	GRMZM2G133430_T01	N/A	N/A	N/A	N/A	N/A	N/A	N/A	N/A
c29493/f1p1/994	1003	71.8994	Sobic.001G098500.2	Cystathionine beta-synthase (CBS) family protein	N/A	N/A	N/A	N/A	N/A	N/A	N/A
c22779/f1p8/1482	1482	71.8074	Sobic.009G201500.1	heat shock protein 101	N/A	N/A	N/A	K03695	Chaperones and folding catalysts ;Longevity regulating pathway - multiple species	GO:0016887,GO:0005524,GO:0019538	ATPase activity;ATP binding;protein metabolic process
c32961/f1p3/1592	1594	71.7727	Sobic.001G374400.2	Heavy metal transport/detoxification superfamily protein	KOG1603	Copper chaperone	P	N/A	N/A	GO:0046872,GO:0030001	metal ion binding;metal ion transport
c6729/f2p5/1425	1426	71.7592	Sobic.002G314300.1	APS reductase 3	KOG0189	Phosphoadenosine phosphosulfate reductase	E	K05907	Sulfur metabolism	GO:0045454,GO:0008152,GO:0003824	cell redox homeostasis;metabolic process;catalytic activity
c23060/f1p0/820	820	71.6303	Sobic.001G222600.1	cyanase	N/A	N/A	N/A	K01725	Nitrogen metabolism	GO:0009439	cyanate metabolic process
c1383/f4p1/1128	1128	71.6149	Sobic.008G029300.2	N/A	N/A	N/A	N/A	N/A	N/A	N/A	N/A
c11083/f1p1/1313	1314	71.6091	Sobic.004G327300.1	Serinc-domain containing serine and sphingolipid biosynthesis protein	KOG2592	Tumor differentially expressed (TDE) protein	S	N/A	N/A	GO:0016020	membrane
c1848/f1p10/1984	1984	71.5867	Sobic.009G245000.2	ADPGLC-PPase large subunit	KOG1322	GDP-mannose pyrophosphorylase/mannose-1-phosphate guanylyltransferase	M	K00975	Starch and sucrose metabolism ;Amino sugar and nucleotide sugar metabolism ;Biofilm formation - Escherichia coli	GO:0016779,GO:0009058	nucleotidyltransferase activity;biosynthetic process
c3177/f1p3/975	975	71.5754	Sobic.002G131700.1	31-kDa RNA binding protein	KOG0131	Splicing factor 3b, subunit 4	A	N/A	N/A	GO:0003676	nucleic acid binding
c24903/f1p0/875	875	71.4647	Zm00008a024188_T01	ubiquiting-conjugating enzyme 2	KOG0419	Ubiquitin-protein ligase	O	K10573	Ubiquitin mediated proteolysis ;Ubiquitin system ;DNA repair and recombination proteins	N/A	N/A
c33837/f6p3/956	956	71.4243	Sobic.003G022300.1	SOUL heme-binding family protein	N/A	N/A	N/A	N/A	N/A	N/A	N/A
c3659/f1p3/1283	1283	71.3314	Sobic.008G065000.1	Mog1/PsbP/DUF1795-like photosystem II reaction center PsbP family protein	N/A	N/A	N/A	N/A	N/A	GO:0019898,GO:0015979,GO:0009654,GO:0009523,GO:0005509	extrinsic component of membrane;photosynthesis;photosystem II oxygen evolving complex;photosystem II;calcium ion binding
c16452/f1p2/791	791	71.2349	Sobic.003G279200.1	NADH-ubiquinone oxidoreductase 20 kDa subunit, mitochondrial	KOG1687	NADH-ubiquinone oxidoreductase, NUFS7/PSST/20 kDa subunit	C	K03940	Oxidative phosphorylation ;Retrograde endocannabinoid signaling ;Alzheimer's disease ;Parkinson's disease ;Huntington's disease ;Non-alcoholic fatty liver disease (NAFLD)	GO:0055114,GO:0051536	oxidation-reduction process;iron-sulfur cluster binding
c24702/f2p4/1106	1107	71.2083	Sobic.009G104000.1	RAN binding protein 1	KOG0864	Ran-binding protein RANBP1 and related RanBD domain proteins	U	K15306	Viral carcinogenesis ;HTLV-I infection	GO:0046907	intracellular transport
c34700/f1p0/1022	1022	71.1404	Sobic.009G234600.1	photosystem II light harvesting complex gene B1B2	N/A	N/A	N/A	K08912	Photosynthesis - antenna proteins ;Photosynthesis proteins	GO:0016020,GO:0009765	membrane;photosynthesis, light harvesting
c35117/f2p11/1138	1138	71.1096	Sobic.009G034600.1	N/A	N/A	N/A	N/A	N/A	N/A	N/A	N/A
c39701/f19p13/1368	1368	71.0708	Sobic.001G005200.4	PGR5-LIKE A	N/A	N/A	N/A	N/A	N/A	N/A	N/A
c13605/f21p20/1293	1293	70.9938	Sobic.001G491000.2	D-ribulose-5-phosphate-3-epimerase	KOG3111	D-ribulose-5-phosphate 3-epimerase	G	K01783	Pentose phosphate pathway ;Pentose and glucuronate interconversions ;Carbon fixation in photosynthetic organisms	GO:0016857,GO:0005975	racemase and epimerase activity, acting on carbohydrates and derivatives;carbohydrate metabolic process
c42252/f1p119/2518	2537	70.9117	Sobic.010G160700.1	phosphoenolpyruvate carboxylase 2	N/A	N/A	N/A	K01595	Pyruvate metabolism ;Carbon fixation in photosynthetic organisms ;Carbon fixation pathways in prokaryotes ;Methane metabolism	GO:0015977,GO:0008964,GO:0006099	carbon fixation;phosphoenolpyruvate carboxylase activity;tricarboxylic acid cycle
c6851/f1p1/779	780	70.89	Sobic.003G199800.4	Protein of unknown function (DUF1118)	N/A	N/A	N/A	N/A	N/A	N/A	N/A
c29260/f1p9/1954	1958	70.8673	Sobic.003G024400.1	CBL-interacting protein kinase 20	KOG0583	Serine/threonine protein kinase	T	N/A	N/A	GO:0007165	signal transduction
c11908/f1p0/881	881	70.8495	Sobic.004G213100.1	temperature-induced lipocalin	KOG4824	Apolipoprotein D/Lipocalin	M	K03098	Exosome	N/A	N/A
c16927/f1p6/1342	1342	70.8457	Sobic.003G186800.1	Major facilitator superfamily protein	KOG2532	Permease of the major facilitator superfamily	G	N/A	N/A	N/A	N/A
c38003/f2p2/1600	1600	70.8221	Sobic.006G147300.1	N/A	N/A	N/A	N/A	N/A	N/A	GO:0016020	membrane
c29046/f1p17/1638	1638	70.8043	Sobic.009G207900.1	N/A	N/A	N/A	N/A	N/A	N/A	N/A	N/A
c4947/f6p3/1864	1864	70.7835	GRMZM2G015295_T01	S-adenosyl-L-homocysteine hydrolase	N/A	N/A	N/A	K01251	Cysteine and methionine metabolism ;Protein phosphatase and associated proteins ;Exosome	GO:0055114,GO:0051287,GO:0006730,GO:0004013	oxidation-reduction process;NAD binding;one-carbon metabolic process;adenosylhomocysteinase activity
c2289/f10p3/1125	1126	70.7276	Sobic.010G266300.1	Translocon-associated protein (TRAP), alpha subunit	KOG1631	Translocon-associated complex TRAP, alpha subunit	U	K13249	Protein processing in endoplasmic reticulum	GO:0005789	endoplasmic reticulum membrane
c25021/f1p4/1254	1255	70.6254	Sobic.008G053200.1	fructose-bisphosphate aldolase 2	N/A	N/A	N/A	K01623	Glycolysis / Gluconeogenesis ;Pentose phosphate pathway ;Fructose and mannose metabolism ;Carbon fixation in photosynthetic organisms ;Methane metabolism ;Membrane trafficking ;Chromosome and associated proteins ;Exosome	GO:0006096,GO:0004332	glycolytic process;fructose-bisphosphate aldolase activity
c34177/f47p36/1431	1432	70.5951	Sobic.002G316700.1	ATPase, F1 complex, gamma subunit protein	KOG1531	F0F1-type ATP synthase, gamma subunit	C	K02115	Oxidative phosphorylation ;Photosynthesis ;Photosynthesis proteins	GO:0046961,GO:0046933,GO:0045261,GO:0015986	proton-transporting ATPase activity, rotational mechanism;proton-transporting ATP synthase activity, rotational mechanism;proton-transporting ATP synthase complex, catalytic core F(1);ATP synthesis coupled proton transport
c30931/f1p2/948	948	70.4125	Sobic.006G131800.1	B-box zinc finger family protein	N/A	N/A	N/A	N/A	N/A	GO:0008270,GO:0005622	zinc ion binding;intracellular
c23217/f1p0/685	685	70.3797	Zm00008a009537_T01	vacuolar ATP synthase subunit H family protein	KOG2759	Vacuolar H+-ATPase V1 sector, subunit H	C	K02144	Oxidative phosphorylation ;mTOR signaling pathway ;Phagosome ;Lysosome ;Synaptic vesicle cycle ;Rheumatoid arthritis ;Vibrio cholerae infection ;Epithelial cell signaling in Helicobacter pylori infection ;Tuberculosis	GO:0016820,GO:0015991,GO:0000221,GO:0046961	hydrolase activity, acting on acid anhydrides, catalyzing transmembrane movement of substances;ATP hydrolysis coupled proton transport;vacuolar proton-transporting V-type ATPase, V1 domain;proton-transporting ATPase activity, rotational mechanism
c31284/f1p0/924	924	70.3494	Sobic.009G065400.1	breast basic conserved 1	KOG3295	60S Ribosomal protein L13	J	K02873	Ribosome ;Ribosome	GO:0006412,GO:0005840,GO:0005622,GO:0003735	translation;ribosome;intracellular;structural constituent of ribosome
c15116/f1p0/1114	1114	70.3217	Sobic.001G370600.3	dehydration-induced protein (ERD15)	N/A	N/A	N/A	N/A	N/A	N/A	N/A
c24139/f2p18/1544	1544	70.2931	Sobic.002G005600.1	Aldolase-type TIM barrel family protein	N/A	N/A	N/A	K06215	Vitamin B6 metabolism	GO:0042823,GO:0042819	pyridoxal phosphate biosynthetic process;vitamin B6 biosynthetic process
c18947/f1p0/1520	1520	70.2523	Sobic.009G052600.1	Adenine nucleotide alpha hydrolases-like superfamily protein	N/A	N/A	N/A	N/A	N/A	GO:0006950	response to stress
c33923/f4p4/1106	1106	70.2375	Sobic.001G104600.1	Thioredoxin superfamily protein	KOG4498	Uncharacterized conserved protein	S	N/A	N/A	N/A	N/A
c34785/f1p0/675	675	70.1889	Sobic.007G138700.1	Ribosomal protein L34e superfamily protein	KOG1790	60s ribosomal protein L34	J	K02915	Ribosome ;Ribosome	GO:0006412,GO:0005840,GO:0005622,GO:0003735	translation;ribosome;intracellular;structural constituent of ribosome
c28494/f1p6/1215	1215	70.1722	Sobic.004G272100.1	phosphoribulokinase	N/A	N/A	N/A	K00855	Carbon fixation in photosynthetic organisms	GO:0016301,GO:0008152,GO:0005524	kinase activity;metabolic process;ATP binding
c12847/f3p21/1764	1764	70.1545	Sobic.003G139500.1	CBL-interacting protein kinase 1	KOG0583	Serine/threonine protein kinase	T	K07198	Protein kinases ;Mitochondrial biogenesis ;Membrane trafficking ;Apelin signaling pathway ;FoxO signaling pathway ;PI3K-Akt signaling pathway ;AMPK signaling pathway ;mTOR signaling pathway ;Autophagy - animal ;Tight junction ;Insulin signaling pathway ;Glucagon signaling pathway ;Adipocytokine signaling pathway ;Oxytocin signaling pathway ;Longevity regulating pathway - mammal ;Longevity regulat…	GO:0007165,GO:0006468,GO:0005524,GO:0004672	signal transduction;protein phosphorylation;ATP binding;protein kinase activity
c9329/f1p13/857	857	70.1382	GRMZM2G010884_T02	photosystem I light harvesting complex gene 3	N/A	N/A	N/A	N/A	N/A	GO:0016020,GO:0009765	membrane;photosynthesis, light harvesting
c16214/f1p2/1089	1089	70.0911	Sobic.002G401000.1	Uncharacterised protein family (UPF0114)	N/A	N/A	N/A	N/A	N/A	N/A	N/A
c36979/f1p9/1190	1193	70.0642	Sobic.008G171300.1	S-adenosyl-L-methionine-dependent methyltransferases superfamily protein	KOG1540	Ubiquinone biosynthesis methyltransferase COQ5	H	K12502	Ubiquinone and other terpenoid-quinone biosynthesis	GO:0008168,GO:0008152	methyltransferase activity;metabolic process
c10300/f1p5/1061	1060	70.0397	Sobic.009G234600.1	photosystem II light harvesting complex gene B1B2	N/A	N/A	N/A	K08912	Photosynthesis - antenna proteins ;Photosynthesis proteins	GO:0016020,GO:0009765	membrane;photosynthesis, light harvesting
c28039/f2p10/1867	1868	70.0271	Sobic.003G370700.2	C2H2 and C2HC zinc fingers superfamily protein	N/A	N/A	N/A	N/A	N/A	N/A	N/A
c952/f16p11/1499	1499	69.99	Sobic.007G034300.1	N/A	N/A	N/A	N/A	N/A	N/A	N/A	N/A
c3870/f2p9/1446	1447	69.9294	Sobic.006G011300.1	Polyketide cyclase/dehydrase and lipid transport superfamily protein	KOG2761	START domain-containing proteins involved in steroidogenesis/phosphatidylcholine transfer	I	N/A	N/A	GO:0008289	lipid binding
c13840/f1p0/980	980	69.9043	Pavir.J05563.1	Histone superfamily protein	KOG1745	Histones H3 and H4	B	K11253	Chromosome and associated proteins ;Exosome ;Transcriptional misregulation in cancers ;Systemic lupus erythematosus ;Alcoholism	GO:0003677,GO:0000786	DNA binding;nucleosome
c13884/f4p12/1202	1202	69.8396	Sobic.010G073700.1	chaperonin 20	KOG1641	Mitochondrial chaperonin	O	K04078	Mitochondrial biogenesis ;Chaperones and folding catalysts	GO:0006457,GO:0005737	protein folding;cytoplasm
c9869/f7p4/1214	1214	69.7843	Sobic.005G107300.1	Protein of unknown function (DUF1685)	N/A	N/A	N/A	N/A	N/A	N/A	N/A
c31611/f1p1/3870	3894	69.7528	Sobic.010G160700.1	phosphoenolpyruvate carboxylase 2	N/A	N/A	N/A	K01595	Pyruvate metabolism ;Carbon fixation in photosynthetic organisms ;Carbon fixation pathways in prokaryotes ;Methane metabolism	GO:0015977,GO:0008964,GO:0006099	carbon fixation;phosphoenolpyruvate carboxylase activity;tricarboxylic acid cycle
c3590/f24p37/2248	2248	69.7477	Sobic.008G136000.1	heat shock protein 70	N/A	N/A	N/A	K03283	Protein phosphatase and associated proteins ;Spliceosome ;Spliceosome ;Ribosome biogenesis ;Mitochondrial biogenesis ;Chaperones and folding catalysts ;Protein processing in endoplasmic reticulum ;Membrane trafficking ;Proteasome ;MAPK signaling pathway ;Cell adhesion molecules and their ligands ;Endocytosis ;Exosome ;Antigen processing and presentation ;Estrogen signaling pathway ;Longevity regu…	N/A	N/A
c14721/f1p0/1215	1215	69.7061	Sobic.003G431700.1	ferredoxin-NADP(+)-oxidoreductase 1	N/A	N/A	N/A	K02641	Photosynthesis ;Photosynthesis proteins	GO:0055114,GO:0016491	oxidation-reduction process;oxidoreductase activity
c22329/f1p3/1209	1209	69.6521	Sobic.001G472000.3	polyamine oxidase 1	KOG0029	Amine oxidase	Q	K13366	Arginine and proline metabolism ;beta-Alanine metabolism	N/A	N/A
c10089/f2p5/1310	1310	69.5855	Sobic.001G420100.1	heat shock protein 70	N/A	N/A	N/A	K03283	Protein phosphatase and associated proteins ;Spliceosome ;Spliceosome ;Ribosome biogenesis ;Mitochondrial biogenesis ;Chaperones and folding catalysts ;Protein processing in endoplasmic reticulum ;Membrane trafficking ;Proteasome ;MAPK signaling pathway ;Cell adhesion molecules and their ligands ;Endocytosis ;Exosome ;Antigen processing and presentation ;Estrogen signaling pathway ;Longevity regu…	N/A	N/A
c14042/f1p0/735	735	69.5616	Sobic.007G002000.1	Heavy metal transport/detoxification superfamily protein	KOG1603	Copper chaperone	P	N/A	N/A	GO:0046872,GO:0030001	metal ion binding;metal ion transport
c36664/f1p4/2661	2661	69.5448	Sobic.010G160700.1	phosphoenolpyruvate carboxylase 2	N/A	N/A	N/A	K01595	Pyruvate metabolism ;Carbon fixation in photosynthetic organisms ;Carbon fixation pathways in prokaryotes ;Methane metabolism	GO:0015977,GO:0008964,GO:0006099	carbon fixation;phosphoenolpyruvate carboxylase activity;tricarboxylic acid cycle
c29149/f1p0/908	910	69.3644	Sobic.001G177800.1	senescence associated gene 24	KOG0857	60s ribosomal protein L10	J	K02866	Ribosome ;Ribosome	GO:0006412,GO:0005840,GO:0003735	translation;ribosome;structural constituent of ribosome
c21741/f1p0/1078	1079	69.1818	Sobic.003G002300.2	Glucose-6-phosphate/phosphate translocator-related	KOG1441	Glucose-6-phosphate/phosphate and phosphoenolpyruvate/phosphate antiporter;Glucose-6-phosphate/phosphate and phosphoenolpyruvate/phosphate antiporter	E;G	K15283	Transporters	N/A	N/A
c16014/f1p1/897	897	69.1457	Sobic.002G052000.2	Chlorophyll A-B binding family protein	N/A	N/A	N/A	N/A	N/A	N/A	N/A
c28395/f1p3/1197	1190	69.1051	Sobic.008G053200.1	fructose-bisphosphate aldolase 2	N/A	N/A	N/A	K01623	Glycolysis / Gluconeogenesis ;Pentose phosphate pathway ;Fructose and mannose metabolism ;Carbon fixation in photosynthetic organisms ;Methane metabolism ;Membrane trafficking ;Chromosome and associated proteins ;Exosome	GO:0006096,GO:0004332	glycolytic process;fructose-bisphosphate aldolase activity
c14534/f90p44/2460	2460	69.0865	Sobic.007G216300.1	HEAT SHOCK PROTEIN 81.4	N/A	N/A	N/A	K04079	Protein phosphatase and associated proteins ;Mitochondrial biogenesis ;Chaperones and folding catalysts ;Protein processing in endoplasmic reticulum ;Membrane trafficking ;Proteasome ;PI3K-Akt signaling pathway ;Exosome ;Necroptosis ;NOD-like receptor signaling pathway ;Antigen processing and presentation ;Th17 cell differentiation ;IL-17 signaling pathway ;Estrogen signaling pathway ;Progesteron…	GO:0051082,GO:0006950,GO:0006457,GO:0005524	unfolded protein binding;response to stress;protein folding;ATP binding
c30618/f1p1/2191	2193	69.0812	Sobic.009G017800.2	dehydroascorbate reductase 2	KOG1422	Intracellular Cl- channel CLIC, contains GST domain	P	N/A	N/A	GO:0005515	protein binding
c28571/f2p0/969	969	69.0203	Sobic.006G260800.2	vitamin E pathway gene 5	KOG4453	Predicted ER membrane protein	S	K18678	Metabolism of cofactors and vitamins	N/A	N/A
c39036/f2p6/1164	1167	68.9263	Sobic.008G038300.1	enzyme binding;tetrapyrrole binding	N/A	N/A	N/A	N/A	N/A	N/A	N/A
c17918/f1p1/1049	1045	68.8941	Sobic.002G134001.1	histidine-containing phosphotransfer factor 5	KOG4747	Two-component phosphorelay intermediate involved in MAP kinase cascade regulation	T	K14490	Plant hormone signal transduction	GO:0004871,GO:0000160	signal transducer activity;phosphorelay signal transduction system
c13123/f1p2/1135	1135	68.8586	Sobic.009G022200.1	arginine/serine-rich zinc knuckle-containing protein 33	KOG0107	Alternative splicing factor SRp20/9G8 (RRM superfamily)	A	K12896	Spliceosome ;Spliceosome ;Herpes simplex infection	GO:0008270,GO:0003676	zinc ion binding;nucleic acid binding
c24195/f72p72/1312	1312	68.8543	Sobic.004G288700.1	plasma membrane intrinsic protein 1;4	KOG0223	Aquaporin (major intrinsic protein family)	G	K09872	Transporters	GO:0016020,GO:0006810,GO:0005215	membrane;transport;transporter activity
c11417/f1p4/1510	1510	68.8191	Sobic.006G139100.1	poly(A) binding protein 8	KOG0123	Polyadenylate-binding protein (RRM superfamily);Polyadenylate-binding protein (RRM superfamily)	A;J	K13126	Spliceosome ;RNA transport ;mRNA surveillance pathway ;Messenger RNA Biogenesis ;RNA degradation	GO:0003723,GO:0003676	RNA binding;nucleic acid binding
c31151/f1p7/1383	1395	68.8149	Sobic.010G262500.1	glyceraldehyde-3-phosphate dehydrogenase C subunit 1	KOG0657	Glyceraldehyde 3-phosphate dehydrogenase	G	K00134	Glycolysis / Gluconeogenesis ;Carbon fixation in photosynthetic organisms ;Membrane trafficking ;HIF-1 signaling pathway ;Exosome ;Alzheimer's disease	GO:0055114,GO:0016620	oxidation-reduction process;oxidoreductase activity, acting on the aldehyde or oxo group of donors, NAD or NADP as acceptor
c24513/f3p3/1120	1120	68.6633	Sobic.007G025400.4	glyceraldehyde-3-phosphate dehydrogenase C subunit 1	KOG0657	Glyceraldehyde 3-phosphate dehydrogenase	G	N/A	N/A	GO:0055114,GO:0016620	oxidation-reduction process;oxidoreductase activity, acting on the aldehyde or oxo group of donors, NAD or NADP as acceptor
c10816/f4p4/2003	2004	68.6287	Sobic.004G211900.1	Adenosylmethionine decarboxylase family protein	KOG0788	S-adenosylmethionine decarboxylase	T	K01611	Cysteine and methionine metabolism ;Arginine and proline metabolism	GO:0008295,GO:0006597,GO:0004014	spermidine biosynthetic process;spermine biosynthetic process;adenosylmethionine decarboxylase activity
c8990/f3p0/1003	1005	68.6229	Sobic.009G043000.1	thioredoxin F2	KOG0907	Thioredoxin	O	N/A	N/A	GO:0045454,GO:0015035,GO:0006662	cell redox homeostasis;protein disulfide oxidoreductase activity;glycerol ether metabolic process
c2836/f1p0/526	526	68.5122	Sobic.004G211833.1	cytochrome C oxidase 6B	N/A	N/A	N/A	K02267	Oxidative phosphorylation ;Cardiac muscle contraction ;Alzheimer's disease ;Parkinson's disease ;Huntington's disease ;Non-alcoholic fatty liver disease (NAFLD)	GO:0005739,GO:0004129	mitochondrion;cytochrome-c oxidase activity
c1454/f3p17/1390	1392	68.4775	Sobic.001G368600.1	NAD(P)-binding Rossmann-fold superfamily protein	N/A	N/A	N/A	N/A	N/A	N/A	N/A
c27335/f1p1/892	894	68.3641	Sobic.009G130400.1	DNA-directed RNA polymerase II	KOG3298	DNA-directed RNA polymerase subunit E'	K	K03015	Purine metabolism ;Pyrimidine metabolism ;RNA polymerase ;Transcription machinery ;Messenger RNA Biogenesis ;DNA repair and recombination proteins ;Huntington's disease ;Epstein-Barr virus infection	GO:0006351,GO:0003899,GO:0003676	transcription, DNA-templated;DNA-directed 5'-3' RNA polymerase activity;nucleic acid binding
c40379/f8p14/1148	1148	68.1551	Sobic.003G288600.1	VIRB2-interacting protein 1	KOG1792	Reticulon	U	N/A	N/A	N/A	N/A
c40490/f1p4/1377	1379	68.1264	Sobic.002G036000.1	Aldolase-type TIM barrel family protein	N/A	N/A	N/A	K11517	Glyoxylate and dicarboxylate metabolism ;Peroxisome	GO:0016491	oxidoreductase activity
c2423/f7p11/1587	1587	68.0985	Sobic.010G173100.1	Translation elongation factor EF1B, gamma chain	KOG1627	Translation elongation factor EF-1 gamma	J	K03233	Messenger RNA Biogenesis ;Translation factors ;Legionellosis	GO:0005515,GO:0006414,GO:0003746	protein binding;translational elongation;translation elongation factor activity
c27722/f1p2/1884	1884	68.0355	Sobic.003G354900.1	Regulator of chromosome condensation (RCC1) family protein	KOG1427	Uncharacterized conserved protein, contains RCC1 domain	S	N/A	N/A	N/A	N/A
c8082/f2p1/1083	1084	68.0323	Zm00008a038566_T01	Ribosomal protein L30/L7 family protein	KOG3184	60S ribosomal protein L7	J	K02937	Ribosome ;Ribosome	N/A	N/A
c36534/f1p5/1646	1646	67.9676	GRMZM5G833699_T01	heat shock protein 90.1	N/A	N/A	N/A	K04079	Protein phosphatase and associated proteins ;Mitochondrial biogenesis ;Chaperones and folding catalysts ;Protein processing in endoplasmic reticulum ;Membrane trafficking ;Proteasome ;PI3K-Akt signaling pathway ;Exosome ;Necroptosis ;NOD-like receptor signaling pathway ;Antigen processing and presentation ;Th17 cell differentiation ;IL-17 signaling pathway ;Estrogen signaling pathway ;Progesteron…	GO:0051082,GO:0006950,GO:0006457,GO:0005524	unfolded protein binding;response to stress;protein folding;ATP binding
c1444/f6p6/1304	1304	67.9436	Sobic.004G320800.2	Chaperone DnaJ-domain superfamily protein	N/A	N/A	N/A	N/A	N/A	N/A	N/A
c36109/f1p2/1629	1631	67.9314	Sobic.004G327300.1	Serinc-domain containing serine and sphingolipid biosynthesis protein	KOG2592	Tumor differentially expressed (TDE) protein	S	N/A	N/A	GO:0016020	membrane
c21825/f1p0/669	660	67.7189	N/A	N/A	N/A	N/A	N/A	N/A	N/A	N/A	N/A
c45261/f1p0/2864	2866	67.6712	Sobic.003G234200.6	beta carbonic anhydrase 4	KOG1578	Predicted carbonic anhydrase involved in protection against oxidative damage	P	K01673	Nitrogen metabolism	GO:0008270,GO:0004089	zinc ion binding;carbonate dehydratase activity
c550/f34p22/2684	2684	67.6393	Sobic.004G220400.1	PHE ammonia lyase 1	N/A	N/A	N/A	K10775	Phenylalanine metabolism ;Phenylpropanoid biosynthesis	N/A	N/A
c35992/f1p2/2589	2592	67.6236	Sobic.010G160700.1	phosphoenolpyruvate carboxylase 2	N/A	N/A	N/A	K01595	Pyruvate metabolism ;Carbon fixation in photosynthetic organisms ;Carbon fixation pathways in prokaryotes ;Methane metabolism	GO:0015977,GO:0008964,GO:0006099	carbon fixation;phosphoenolpyruvate carboxylase activity;tricarboxylic acid cycle
c19388/f1p2/1268	1266	67.5135	Sobic.002G288300.1	photosystem II light harvesting complex gene B1B2	N/A	N/A	N/A	K08912	Photosynthesis - antenna proteins ;Photosynthesis proteins	GO:0016020,GO:0009765	membrane;photosynthesis, light harvesting
c11889/f1p0/752	752	67.4992	Sobic.009G015700.1	actin depolymerizing factor 4	KOG1735	Actin depolymerizing factor	Z	K05765	Membrane trafficking ;Exosome ;Regulation of actin cytoskeleton ;Cytoskeleton proteins ;Fc gamma R-mediated phagocytosis ;Axon guidance ;Pertussis	GO:0005622,GO:0003779,GO:0030042,GO:0015629	intracellular;actin binding;actin filament depolymerization;actin cytoskeleton
c17658/f1p3/1565	1564	67.4418	Sobic.003G327800.1	cytochrome P450, family 98, subfamily A, polypeptide 3	KOG0156	Cytochrome P450 CYP2 subfamily	Q	K09754	Phenylpropanoid biosynthesis ;Stilbenoid;Flavonoid biosynthesis ;Cytochrome P450	GO:0055114,GO:0020037,GO:0016705,GO:0005506	oxidation-reduction process;heme binding;oxidoreductase activity, acting on paired donors, with incorporation or reduction of molecular oxygen;iron ion binding
c10893/f2p2/1127	1129	67.3535	Sobic.008G112300.1	dicarboxylate transporter 1	N/A	N/A	N/A	N/A	N/A	GO:0055085,GO:0016021	transmembrane transport;integral component of membrane
c16315/f1p0/984	984	67.2843	Sobic.008G100000.1	Ribosomal protein S4	KOG3301	Ribosomal protein S4	J	K02997	Ribosome ;Ribosome	GO:0019843,GO:0005622,GO:0003723	rRNA binding;intracellular;RNA binding
c9230/f1p4/1280	1280	67.2732	Sobic.003G413800.1	cytochrome P450, family 87, subfamily A, polypeptide 6	KOG0156	Cytochrome P450 CYP2 subfamily	Q	N/A	N/A	GO:0055114,GO:0020037,GO:0016705,GO:0005506	oxidation-reduction process;heme binding;oxidoreductase activity, acting on paired donors, with incorporation or reduction of molecular oxygen;iron ion binding
c14257/f3p6/1627	1627	67.222	Sobic.008G064700.1	galactose-1-phosphate guanylyltransferase (GDP)s;GDP-D-glucose phosphorylases;quercetin 4\'-O-glucosyltransferases	KOG2720	Predicted hydrolase (HIT family)	R	K14190	Ascorbate and aldarate metabolism	GO:0080048	GDP-D-glucose phosphorylase activity
c20508/f1p0/1193	1193	67.2157	Sobic.007G068900.1	Ubiquitin-like superfamily protein	KOG1654	Microtubule-associated anchor protein involved in autophagy and membrane trafficking	Z	K08341	Mitochondrial biogenesis ;Membrane trafficking ;Ubiquitin system ;Apelin signaling pathway ;FoxO signaling pathway ;Autophagy - animal ;Autophagy - yeast ;Autophagy - other eukaryotes ;Mitophagy - animal ;Mitophagy - yeast ;NOD-like receptor signaling pathway ;GABAergic synapse ;Longevity regulating pathway - worm ;Kaposi's sarcoma-associated herpesvirus infection	GO:0005737,GO:0000045	cytoplasm;autophagosome assembly
c1300/f5p6/1300	1300	67.1823	Sobic.010G027000.1	Enolase	N/A	N/A	N/A	K01689	Glycolysis / Gluconeogenesis ;Methane metabolism ;Messenger RNA Biogenesis ;RNA degradation ;HIF-1 signaling pathway ;Exosome	GO:0006096,GO:0004634,GO:0000287,GO:0000015	glycolytic process;phosphopyruvate hydratase activity;magnesium ion binding;phosphopyruvate hydratase complex
c7785/f2p0/945	945	67.1727	Sobic.004G103700.1	Ribosomal protein L16p/L10e family protein	KOG0857	60s ribosomal protein L10	J	K02866	Ribosome ;Ribosome	GO:0006412,GO:0005840,GO:0003735	translation;ribosome;structural constituent of ribosome
c11789/f1p0/649	651	67.0455	Sobic.007G004700.1	2Fe-2S ferredoxin-like superfamily protein	N/A	N/A	N/A	K02639	Photosynthesis ;Photosynthesis proteins	GO:0051536,GO:0009055	iron-sulfur cluster binding;electron carrier activity
c34427/f6p8/1353	1353	66.9867	Sobic.007G216300.1	HEAT SHOCK PROTEIN 81.4	N/A	N/A	N/A	K04079	Protein phosphatase and associated proteins ;Mitochondrial biogenesis ;Chaperones and folding catalysts ;Protein processing in endoplasmic reticulum ;Membrane trafficking ;Proteasome ;PI3K-Akt signaling pathway ;Exosome ;Necroptosis ;NOD-like receptor signaling pathway ;Antigen processing and presentation ;Th17 cell differentiation ;IL-17 signaling pathway ;Estrogen signaling pathway ;Progesteron…	GO:0051082,GO:0006950,GO:0006457,GO:0005524	unfolded protein binding;response to stress;protein folding;ATP binding
c14399/f1p2/1452	1452	66.9644	Sobic.001G426000.1	HSP20-like chaperones superfamily protein	KOG0710	Molecular chaperone (small heat-shock protein Hsp26/Hsp42)	O	K13993	Chaperones and folding catalysts ;Protein processing in endoplasmic reticulum	N/A	N/A
c39438/f8p8/1507	1507	66.9526	Sobic.003G359100.1	sedoheptulose-bisphosphatase	KOG1458	Fructose-1,6-bisphosphatase	G	K01100	Carbon fixation in photosynthetic organisms	GO:0042578,GO:0042132,GO:0005975	phosphoric ester hydrolase activity;fructose 1,6-bisphosphate 1-phosphatase activity;carbohydrate metabolic process
c13390/f3p8/1624	1625	66.8914	Sobic.006G147300.1	N/A	N/A	N/A	N/A	N/A	N/A	GO:0016020	membrane
c19289/f1p8/2393	2390	66.8762	GRMZM2G450125_T01	beta-amylase 1	N/A	N/A	N/A	K01177	Starch and sucrose metabolism	GO:0016161,GO:0000272	beta-amylase activity;polysaccharide catabolic process
c46379/f3p10/2498	2498	66.82	Sobic.009G201500.1	heat shock protein 101	N/A	N/A	N/A	K03695	Chaperones and folding catalysts ;Longevity regulating pathway - multiple species	GO:0016887,GO:0005524,GO:0019538	ATPase activity;ATP binding;protein metabolic process
c25110/f1p1/882	882	66.8144	Sobic.002G045300.1	ubiquiting-conjugating enzyme 2	KOG0419	Ubiquitin-protein ligase	O	K10573	Ubiquitin mediated proteolysis ;Ubiquitin system ;DNA repair and recombination proteins	N/A	N/A
c46364/f4p12/2485	2485	66.8003	Sobic.001G498200.2	evolutionarily conserved C-terminal region 2	KOG1901	Uncharacterized high-glucose-regulated protein	R	N/A	N/A	N/A	N/A
c14995/f2p0/621	621	66.7942	Sobic.007G004700.1	2Fe-2S ferredoxin-like superfamily protein	N/A	N/A	N/A	K02639	Photosynthesis ;Photosynthesis proteins	GO:0051536,GO:0009055	iron-sulfur cluster binding;electron carrier activity
c34831/f1p10/1503	1503	66.7734	Sobic.007G166300.1	lactate/malate dehydrogenase family protein	KOG1496	Malate dehydrogenase	C	K00051	Pyruvate metabolism ;Carbon fixation in photosynthetic organisms	GO:0055114,GO:0016491,GO:0016616,GO:0016615,GO:0006108	oxidation-reduction process;oxidoreductase activity;oxidoreductase activity, acting on the CH-OH group of donors, NAD or NADP as acceptor;malate dehydrogenase activity;malate metabolic process
c35025/f1p3/1304	1304	66.7377	Sobic.001G469600.1	polyol/monosaccharide transporter 5	KOG0254	Predicted transporter (major facilitator superfamily)	R	N/A	N/A	GO:0055085,GO:0022857,GO:0016021	transmembrane transport;transmembrane transporter activity;integral component of membrane
c741/f16p8/1177	1178	66.729	Sobic.001G093500.7	N/A	N/A	N/A	N/A	N/A	N/A	N/A	N/A
c26735/f1p2/1116	1118	66.6756	Sobic.002G401000.1	Uncharacterised protein family (UPF0114)	N/A	N/A	N/A	N/A	N/A	N/A	N/A
c5244/f10p10/1219	1219	66.6512	GRMZM2G132358_T01	Cyclase family protein	N/A	N/A	N/A	N/A	N/A	GO:0019441,GO:0004061	tryptophan catabolic process to kynurenine;arylformamidase activity
c4508/f1p4/1040	1040	66.6103	Sobic.009G246950.1	RNA-binding (RRM/RBD/RNP motifs) family protein	KOG4211	Splicing factor hnRNP-F and related RNA-binding proteins	A	K12898	Spliceosome	N/A	N/A
c2370/f2p5/1081	1081	66.5734	Sobic.004G259200.2	ADP/ATP carrier 2	KOG0749	Mitochondrial ADP/ATP carrier proteins	C	K05863	Mitochondrial biogenesis ;Transporters ;Calcium signaling pathway ;cGMP - PKG signaling pathway ;Necroptosis ;Cellular senescence ;Parkinson's disease ;Huntington's disease ;HTLV-I infection	N/A	N/A
c27232/f1p7/1118	1116	66.5441	Sobic.002G288300.1	photosystem II light harvesting complex gene B1B2	N/A	N/A	N/A	K08912	Photosynthesis - antenna proteins ;Photosynthesis proteins	GO:0016020,GO:0009765	membrane;photosynthesis, light harvesting
c20888/f1p5/1208	1208	66.5187	Sobic.006G212800.1	Uncharacterized conserved protein (DUF2358)	KOG4457	Uncharacterized conserved protein	S	N/A	N/A	N/A	N/A
c16776/f1p0/807	807	66.5168	Sobic.007G002000.1	Heavy metal transport/detoxification superfamily protein	KOG1603	Copper chaperone	P	N/A	N/A	GO:0046872,GO:0030001	metal ion binding;metal ion transport
c38393/f1p1/1491	1493	66.5037	Sobic.004G050100.3	polyubiquitin 10	KOG0001	Ubiquitin and ubiquitin-like proteins;Ubiquitin and ubiquitin-like proteins	O;R	K08770	Ubiquitin system ;PPAR signaling pathway	N/A	N/A
c8482/f2p0/932	934	66.4947	Zm00008a020640_T01	high mobility group B2	KOG0381	HMG box-containing protein	R	K10802	Chromosome and associated proteins ;Base excision repair ;DNA repair and recombination proteins ;Exosome ;Autophagy - animal ;Necroptosis	GO:0006355,GO:0005634,GO:0003682,GO:0003677	regulation of transcription, DNA-templated;nucleus;chromatin binding;DNA binding
c33713/f1p2/1274	1274	66.4154	GRMZM2G154397_T01	Adenosylmethionine decarboxylase family protein	KOG0788	S-adenosylmethionine decarboxylase	T	K01611	Cysteine and methionine metabolism ;Arginine and proline metabolism	GO:0008295,GO:0006597,GO:0004014	spermidine biosynthetic process;spermine biosynthetic process;adenosylmethionine decarboxylase activity
c12778/f1p5/1891	1890	66.323	Sobic.001G498200.4	evolutionarily conserved C-terminal region 2	KOG1901	Uncharacterized high-glucose-regulated protein	R	N/A	N/A	N/A	N/A
c5905/f1p1/819	819	66.2492	Sobic.006G194300.1	Protein of unknown function (DUF581)	N/A	N/A	N/A	N/A	N/A	N/A	N/A
c12489/f1p1/1022	1022	66.2268	Sobic.002G259000.1	Ribosomal protein L7Ae/L30e/S12e/Gadd45 family protein	KOG3166	60S ribosomal protein L7A	J	K02936	Ribosome ;Ribosome ;Ribosome biogenesis	N/A	N/A
c5640/f1p4/1216	1216	66.1627	Sobic.001G107500.1	cyclin-dependent kinase C;1	N/A	N/A	N/A	K08819	Protein kinases	GO:0006468,GO:0005524,GO:0004672	protein phosphorylation;ATP binding;protein kinase activity
c25051/f1p4/1643	1645	66.0978	Sobic.001G504000.14	Divalent ion symporter	KOG2639	Sodium sulfate symporter and related arsenite permeases	P	N/A	N/A	GO:0055085,GO:0016020,GO:0006814,GO:0005215	transmembrane transport;membrane;sodium ion transport;transporter activity
c18641/f1p0/852	852	66.0918	Sobic.006G064200.1	serine-rich protein-related	N/A	N/A	N/A	N/A	N/A	N/A	N/A
c12759/f3p5/1166	1166	66.0901	Sobic.004G021300.1	NAD(P)-linked oxidoreductase superfamily protein	KOG1577	Aldo/keto reductase family proteins	R	N/A	N/A	N/A	N/A
c32448/f1p0/915	917	66.0843	Sobic.001G011200.1	basic transcription factor 3	KOG2240	RNA polymerase II general transcription factor BTF3 and related proteins	K	K01527	Apoptosis - fly	N/A	N/A
c197/f41p34/1648	1651	66.0763	Sobic.003G234200.6	beta carbonic anhydrase 4	KOG1578	Predicted carbonic anhydrase involved in protection against oxidative damage	P	K01673	Nitrogen metabolism	GO:0008270,GO:0004089	zinc ion binding;carbonate dehydratase activity
c1122/f6p2/1618	1617	66.0517	Sobic.004G255700.1	Sucrase/ferredoxin-like family protein	N/A	N/A	N/A	N/A	N/A	N/A	N/A
c36644/f1p2/630	631	66.0015	Sobic.004G125800.2	tocopherol cyclase, chloroplast / vitamin E deficient 1 (VTE1) / sucrose export defective 1 (SXD1)	N/A	N/A	N/A	N/A	N/A	GO:0009976	tocopherol cyclase activity
c10426/f3p1/883	885	65.9984	Sobic.004G018400.1	Cyclophilin-like peptidyl-prolyl cis-trans isomerase family protein	KOG0865	Cyclophilin type peptidyl-prolyl cis-trans isomerase	O	K01802	Protein folding and associated processing	GO:0006457,GO:0003755,GO:0000413	protein folding;peptidyl-prolyl cis-trans isomerase activity;protein peptidyl-prolyl isomerization
c39224/f1p7/1018	1018	65.9414	Sobic.006G058900.1	Ubiquinol-cytochrome C reductase iron-sulfur subunit	KOG1671	Ubiquinol cytochrome c reductase, subunit RIP1	C	K00411	Oxidative phosphorylation ;Two-component system ;Cardiac muscle contraction ;Alzheimer's disease ;Parkinson's disease ;Huntington's disease ;Non-alcoholic fatty liver disease (NAFLD)	GO:0055114,GO:0051537,GO:0016491,GO:0008121,GO:0016679	oxidation-reduction process;2 iron, 2 sulfur cluster binding;oxidoreductase activity;ubiquinol-cytochrome-c reductase activity;oxidoreductase activity, acting on diphenols and related substances as donors
c7368/f1p4/1135	1135	65.9151	Sobic.001G426800.3	RNA-binding (RRM/RBD/RNP motifs) family protein	KOG0107,KOG4207	Alternative splicing factor SRp20/9G8 (RRM superfamily);Predicted splicing factor, SR protein superfamily	A;A	N/A	N/A	GO:0003676	nucleic acid binding
c2819/f1p0/1030	1030	65.8551	Sobic.009G174900.1	ubiquitin-conjugating enzyme 11	KOG0417	Ubiquitin-protein ligase	O	K06689	Protein processing in endoplasmic reticulum ;Ubiquitin mediated proteolysis ;Ubiquitin system ;MAPK signaling pathway - fly ;Toll and Imd signaling pathway	GO:0005515	protein binding
c37527/f2p3/1283	1283	65.8266	Sobic.001G420100.1	heat shock protein 70	N/A	N/A	N/A	K03283	Protein phosphatase and associated proteins ;Spliceosome ;Spliceosome ;Ribosome biogenesis ;Mitochondrial biogenesis ;Chaperones and folding catalysts ;Protein processing in endoplasmic reticulum ;Membrane trafficking ;Proteasome ;MAPK signaling pathway ;Cell adhesion molecules and their ligands ;Endocytosis ;Exosome ;Antigen processing and presentation ;Estrogen signaling pathway ;Longevity regu…	N/A	N/A
c36841/f1p0/763	765	65.6877	Sobic.003G078200.1	Translation protein SH3-like family protein	KOG3401	60S ribosomal protein L26	J	K02898	Ribosome ;Ribosome	GO:0015934,GO:0006412,GO:0003735	large ribosomal subunit;translation;structural constituent of ribosome
c18132/f1p0/1463	1462	65.6496	Sobic.002G338000.1	light harvesting complex photosystem II	N/A	N/A	N/A	K08915	Photosynthesis - antenna proteins ;Photosynthesis proteins	GO:0016020,GO:0009765	membrane;photosynthesis, light harvesting
c1303/f10p9/1489	1483	65.6464	Sobic.003G002300.1	Glucose-6-phosphate/phosphate translocator-related	KOG1441	Glucose-6-phosphate/phosphate and phosphoenolpyruvate/phosphate antiporter;Glucose-6-phosphate/phosphate and phosphoenolpyruvate/phosphate antiporter	E;G	K15283	Transporters	N/A	N/A
c12277/f2p20/2627	2627	65.6384	Sobic.006G005600.1	heat shock protein 90.1	N/A	N/A	N/A	K04079	Protein phosphatase and associated proteins ;Mitochondrial biogenesis ;Chaperones and folding catalysts ;Protein processing in endoplasmic reticulum ;Membrane trafficking ;Proteasome ;PI3K-Akt signaling pathway ;Exosome ;Necroptosis ;NOD-like receptor signaling pathway ;Antigen processing and presentation ;Th17 cell differentiation ;IL-17 signaling pathway ;Estrogen signaling pathway ;Progesteron…	GO:0051082,GO:0006950,GO:0006457,GO:0005524	unfolded protein binding;response to stress;protein folding;ATP binding
c22184/f7p12/1294	1293	65.613	Sobic.007G016600.1	N/A	N/A	N/A	N/A	N/A	N/A	N/A	N/A
c18900/f1p6/1103	1103	65.6091	Sobic.008G039900.1	glycine decarboxylase P-protein 2	N/A	N/A	N/A	K00281	Glyoxylate and dicarboxylate metabolism ;Glycine	GO:0055114,GO:0006546,GO:0004375	oxidation-reduction process;glycine catabolic process;glycine dehydrogenase (decarboxylating) activity
c11200/f3p1/1035	1039	65.6028	Sobic.007G128500.1	N/A	N/A	N/A	N/A	N/A	N/A	N/A	N/A
c18724/f1p2/1061	1062	65.5924	Sobic.001G252000.1	uridylyltransferase-related	N/A	N/A	N/A	N/A	N/A	N/A	N/A
c13172/f2p1/1562	1561	65.5802	Sobic.009G028500.5	zinc finger (CCCH-type) family protein	KOG1595	CCCH-type Zn-finger protein	R	N/A	N/A	GO:0046872	metal ion binding
c2361/f2p2/1017	1017	65.546	Sobic.010G104800.1	Caleosin-related family protein	N/A	N/A	N/A	K17991	Cutin	N/A	N/A
c14156/f2p4/1280	1279	65.5327	Sobic.009G246400.1	solanesyl diphosphate synthase 2	KOG0776	Geranylgeranyl pyrophosphate synthase/Polyprenyl synthetase	H	K05356	Prenyltransferases ;Terpenoid backbone biosynthesis	GO:0008299,GO:0016765,GO:0015979	isoprenoid biosynthetic process;transferase activity, transferring alkyl or aryl (other than methyl) groups;photosynthesis
c4491/f1p0/828	834	65.5081	Sobic.008G030801.1	N/A	N/A	N/A	N/A	N/A	N/A	N/A	N/A
c39911/f29p13/1282	1284	65.3989	Sobic.001G426800.2	RNA-binding (RRM/RBD/RNP motifs) family protein	KOG0107,KOG4207	Alternative splicing factor SRp20/9G8 (RRM superfamily);Predicted splicing factor, SR protein superfamily	A;A	N/A	N/A	GO:0003676	nucleic acid binding
c20087/f2p0/777	778	65.323	GRMZM2G120432_T01	Ribosomal protein S11 family protein	KOG0407	40S ribosomal protein S14	J	K02955	Ribosome ;Ribosome	GO:0006412,GO:0005840,GO:0003735	translation;ribosome;structural constituent of ribosome
c13564/f38p22/1320	1324	65.3109	GRMZM2G028325_T01	NOD26-like intrinsic protein 5;1	KOG0223	Aquaporin (major intrinsic protein family)	G	K09874	Transporters	GO:0016020,GO:0006810,GO:0005215	membrane;transport;transporter activity
c4869/f1p1/1494	1494	65.2648	Sobic.004G170200.1	Pyridoxal phosphate (PLP)-dependent transferases superfamily protein	KOG0629	Glutamate decarboxylase and related proteins	E	K01590	Histidine metabolism	GO:0030170,GO:0019752,GO:0016831	pyridoxal phosphate binding;carboxylic acid metabolic process;carboxy-lyase activity
c3797/f2p3/2049	2049	65.2491	Sobic.003G042700.1	Serinc-domain containing serine and sphingolipid biosynthesis protein	KOG2592	Tumor differentially expressed (TDE) protein	S	N/A	N/A	GO:0016020	membrane
c13307/f1p2/1170	1170	65.237	Sobic.009G043000.2	thioredoxin F2	N/A	N/A	N/A	N/A	N/A	GO:0045454,GO:0015035,GO:0006662	cell redox homeostasis;protein disulfide oxidoreductase activity;glycerol ether metabolic process
c11623/f1p5/2241	2241	65.1615	Sobic.006G005600.1	heat shock protein 90.1	N/A	N/A	N/A	K04079	Protein phosphatase and associated proteins ;Mitochondrial biogenesis ;Chaperones and folding catalysts ;Protein processing in endoplasmic reticulum ;Membrane trafficking ;Proteasome ;PI3K-Akt signaling pathway ;Exosome ;Necroptosis ;NOD-like receptor signaling pathway ;Antigen processing and presentation ;Th17 cell differentiation ;IL-17 signaling pathway ;Estrogen signaling pathway ;Progesteron…	GO:0051082,GO:0006950,GO:0006457,GO:0005524	unfolded protein binding;response to stress;protein folding;ATP binding
c23041/f1p15/2716	2713	65.1506	Sobic.003G350700.1	heat shock protein 70	N/A	N/A	N/A	K03283	Protein phosphatase and associated proteins ;Spliceosome ;Spliceosome ;Ribosome biogenesis ;Mitochondrial biogenesis ;Chaperones and folding catalysts ;Protein processing in endoplasmic reticulum ;Membrane trafficking ;Proteasome ;MAPK signaling pathway ;Cell adhesion molecules and their ligands ;Endocytosis ;Exosome ;Antigen processing and presentation ;Estrogen signaling pathway ;Longevity regu…	N/A	N/A
c2448/f3p7/1223	1223	65.1006	Sobic.002G116000.1	UDP-Glycosyltransferase superfamily protein	N/A	N/A	N/A	K13679	Starch and sucrose metabolism ;Glycosyltransferases	N/A	N/A
c17588/f3p3/1870	1870	65.0439	Sobic.004G233200.1	Integrase-type DNA-binding superfamily protein	N/A	N/A	N/A	K09286	Transcription factors	GO:0006355,GO:0003700	regulation of transcription, DNA-templated;DNA binding transcription factor activity
c36257/f3p6/1469	1469	64.9993	Sobic.001G519800.1	glyceraldehyde-3-phosphate dehydrogenase B subunit	KOG0657	Glyceraldehyde 3-phosphate dehydrogenase	G	K05298	Carbon fixation in photosynthetic organisms	GO:0055114,GO:0016620	oxidation-reduction process;oxidoreductase activity, acting on the aldehyde or oxo group of donors, NAD or NADP as acceptor
c29816/f1p2/1187	1188	64.9761	N/A	N/A	N/A	N/A	N/A	N/A	N/A	N/A	N/A
c45898/f1p3/2525	2534	64.9601	Sobic.010G160700.1	phosphoenolpyruvate carboxylase 2	N/A	N/A	N/A	K01595	Pyruvate metabolism ;Carbon fixation in photosynthetic organisms ;Carbon fixation pathways in prokaryotes ;Methane metabolism	GO:0015977,GO:0008964,GO:0006099	carbon fixation;phosphoenolpyruvate carboxylase activity;tricarboxylic acid cycle
c40230/f1p15/1250	1252	64.9077	Sobic.008G037800.1	ACT domain-containing protein	N/A	N/A	N/A	N/A	N/A	N/A	N/A
c23571/f4p22/1531	1531	64.9013	Sobic.004G272100.1	phosphoribulokinase	N/A	N/A	N/A	K00855	Carbon fixation in photosynthetic organisms	GO:0016301,GO:0008152,GO:0005524	kinase activity;metabolic process;ATP binding
c5361/f2p2/983	983	64.8833	Sobic.003G416300.1	Glutathione S-transferase family protein	KOG0867	Glutathione S-transferase	O	K00799	Glutathione metabolism ;Metabolism of xenobiotics by cytochrome P450 ;Drug metabolism - cytochrome P450 ;Transporters ;Pathways in cancer ;Chemical carcinogenesis ;Hepatocellular carcinoma ;Fluid shear stress and atherosclerosis ;Platinum drug resistance	GO:0005515	protein binding
c1021/f9p13/1065	1065	64.8423	Sobic.004G208400.1	B-box zinc finger family protein	N/A	N/A	N/A	N/A	N/A	GO:0008270,GO:0005622	zinc ion binding;intracellular
c6713/f1p1/1069	1069	64.8359	Sobic.006G021000.1	flavin-dependent monooxygenase 1	N/A	N/A	N/A	K00485	Drug metabolism - cytochrome P450	N/A	N/A
c28854/f1p18/1292	1291	64.8251	Sobic.004G142800.1	Papain family cysteine protease	KOG1542	Cysteine proteinase Cathepsin F	O	K01373	Peptidases ;Lysosome ;Apoptosis	GO:0008234,GO:0006508	cysteine-type peptidase activity;proteolysis
c39094/f1p2/1317	1317	64.7953	Sobic.010G181300.1	SOUL heme-binding family protein	N/A	N/A	N/A	N/A	N/A	N/A	N/A
c9227/f1p2/1111	1111	64.778	Sobic.001G446100.3	Erythronate-4-phosphate dehydrogenase family protein	N/A	N/A	N/A	N/A	N/A	N/A	N/A
c14139/f2p2/1907	1911	64.7574	Sobic.001G283100.2	membrane protein, putative	N/A	N/A	N/A	N/A	N/A	N/A	N/A
c17389/f5p4/1256	1256	64.7458	Sobic.001G499100.1	ABC-2 type transporter family protein	N/A	N/A	N/A	N/A	N/A	GO:0016887,GO:0005524,GO:0016020	ATPase activity;ATP binding;membrane
c40438/f1p1/1097	1097	64.694	Sobic.004G202200.1	RAB GTPase homolog E1B	N/A	N/A	N/A	K02358	Mitochondrial biogenesis ;Translation factors ;Exosome	GO:0005525	GTP binding
c29894/f1p1/651	652	64.6545	Sobic.001G329300.1	Uncharacterised protein family SERF	N/A	N/A	N/A	N/A	N/A	N/A	N/A
c2354/f2p3/971	971	64.6456	Sobic.001G112900.2	Protein of unknown function (DUF760)	N/A	N/A	N/A	N/A	N/A	N/A	N/A
c25847/f1p0/906	905	64.424	Sobic.007G007900.1	mago nashi family protein	KOG3392	Exon-exon junction complex, Magoh component	A	K12877	Spliceosome ;Spliceosome ;RNA transport ;mRNA surveillance pathway ;Messenger RNA Biogenesis	GO:0005634	nucleus
c7054/f1p12/1798	1798	64.2667	Sobic.001G112900.1	Protein of unknown function (DUF760)	N/A	N/A	N/A	N/A	N/A	N/A	N/A
c24637/f2p4/1153	1154	64.2443	Pavir.Ca02372.1	N/A	N/A	N/A	N/A	N/A	N/A	N/A	N/A
c39730/f11p18/1349	1351	64.1731	Sobic.005G145201.1	general regulatory factor 2	KOG0841	Multifunctional chaperone (14-3-3 family)	O	K06630	DNA repair and recombination proteins ;MAPK signaling pathway - yeast ;Hippo signaling pathway ;Hippo signaling pathway -fly ;PI3K-Akt signaling pathway ;Exosome ;Cell cycle ;Oocyte meiosis ;Neurotrophin signaling pathway ;Viral carcinogenesis ;Epstein-Barr virus infection	GO:0019904	protein domain specific binding
c6801/f2p0/901	901	64.1667	Sobic.007G135800.1	Ribosomal protein L12/ ATP-dependent Clp protease adaptor protein ClpS family protein	N/A	N/A	N/A	K06891	Protein folding and associated processing	GO:0030163	protein catabolic process
c37166/f3p12/3063	3063	64.1258	Sobic.010G160700.1	phosphoenolpyruvate carboxylase 2	N/A	N/A	N/A	K01595	Pyruvate metabolism ;Carbon fixation in photosynthetic organisms ;Carbon fixation pathways in prokaryotes ;Methane metabolism	GO:0015977,GO:0008964,GO:0006099	carbon fixation;phosphoenolpyruvate carboxylase activity;tricarboxylic acid cycle
c32884/f1p0/1013	1013	64.078	Pahal.D00082.1	cyclophilin 5	KOG0880	Peptidyl-prolyl cis-trans isomerase	O	K01802	Protein folding and associated processing	GO:0006457,GO:0003755,GO:0000413	protein folding;peptidyl-prolyl cis-trans isomerase activity;protein peptidyl-prolyl isomerization
c25846/f1p0/855	855	64.0745	Sobic.002G184400.1	Integrase-type DNA-binding superfamily protein	N/A	N/A	N/A	K09286	Transcription factors	GO:0006355,GO:0003700	regulation of transcription, DNA-templated;DNA binding transcription factor activity
c13964/f2p0/735	737	64.0336	Sobic.001G122400.1	Ribosomal protein S13/S18 family	KOG3311	Ribosomal protein S18	J	K02952	Ribosome ;Ribosome	GO:0006412,GO:0005840,GO:0005622,GO:0003735,GO:0003723	translation;ribosome;intracellular;structural constituent of ribosome;RNA binding
c37671/f3p3/2542	2542	64.033	Sobic.003G403300.1	sucrose phosphate synthase 3F	KOG0853	Glycosyltransferase	M	K00696	Starch and sucrose metabolism	GO:0016157,GO:0005985	sucrose synthase activity;sucrose metabolic process
c27641/f1p8/1643	1643	63.9735	Sobic.003G151600.1	S-adenosylmethionine synthetase family protein	N/A	N/A	N/A	K00789	Cysteine and methionine metabolism	GO:0006556,GO:0004478,GO:0005524	S-adenosylmethionine biosynthetic process;methionine adenosyltransferase activity;ATP binding
c9095/f1p0/760	760	63.9326	Sobic.008G062500.1	Single hybrid motif superfamily protein	KOG3373	Glycine cleavage system H protein (lipoate-binding)	E	K02437	Glyoxylate and dicarboxylate metabolism ;Glycine	N/A	N/A
c38901/f1p1/760	762	63.8972	Sobic.003G106500.1	N/A	N/A	N/A	N/A	N/A	N/A	N/A	N/A
c39396/f2p1/1369	1370	63.8969	Sobic.002G036000.1	Aldolase-type TIM barrel family protein	N/A	N/A	N/A	K11517	Glyoxylate and dicarboxylate metabolism ;Peroxisome	GO:0016491	oxidoreductase activity
c34089/f28p16/1479	1479	63.87	Sobic.002G420900.2	hydroxyproline-rich glycoprotein family protein	N/A	N/A	N/A	N/A	N/A	N/A	N/A
c17435/f1p3/1097	1098	63.869	Sobic.009G129800.1	alpha/beta-Hydrolases superfamily protein	KOG3043	Predicted hydrolase related to dienelactone hydrolase	R	N/A	N/A	N/A	N/A
c21381/f1p5/1865	1865	63.862	Sobic.003G130800.1	Pyruvate kinase family protein	N/A	N/A	N/A	K00873	Glycolysis / Gluconeogenesis ;Pyruvate metabolism ;Purine metabolism ;Membrane trafficking ;Exosome ;Glucagon signaling pathway ;Central carbon metabolism in cancer ;Viral carcinogenesis ;Type II diabetes mellitus ;Human papillomavirus infection	GO:0030955,GO:0006096,GO:0004743,GO:0000287	potassium ion binding;glycolytic process;pyruvate kinase activity;magnesium ion binding
c43837/f1p5/976	976	63.8266	Sobic.009G072100.1	Zinc finger C-x8-C-x5-C-x3-H type family protein	N/A	N/A	N/A	N/A	N/A	GO:0046872	metal ion binding
c4930/f2p8/1194	1194	63.8111	Sobic.003G149800.4	SERINE-ARGININE PROTEIN 30	KOG0105	Alternative splicing factor ASF/SF2 (RRM superfamily)	A	K12890	Spliceosome ;Spliceosome ;IL-17 signaling pathway ;Herpes simplex infection	GO:0003676	nucleic acid binding
c2047/f36p34/1488	1488	63.7786	Sobic.003G431700.1	ferredoxin-NADP(+)-oxidoreductase 1	N/A	N/A	N/A	K02641	Photosynthesis ;Photosynthesis proteins	GO:0055114,GO:0016491	oxidation-reduction process;oxidoreductase activity
c39109/f1p0/710	710	63.7723	GRMZM2G004909_T01	Bifunctional inhibitor/lipid-transfer protein/seed storage 2S albumin superfamily protein	N/A	N/A	N/A	N/A	N/A	N/A	N/A
c41142/f1p7/2165	2165	63.7381	Sobic.003G036200.1	NADP-malic enzyme 4	N/A	N/A	N/A	K00029	Pyruvate metabolism ;Carbon fixation in photosynthetic organisms	GO:0055114,GO:0004471,GO:0051287	oxidation-reduction process;malate dehydrogenase (decarboxylating) (NAD+) activity;NAD binding
c10555/f1p1/5062	5063	63.7234	LOC_Os09g01000.1	N/A	N/A	N/A	N/A	N/A	N/A	N/A	N/A
c22421/f1p6/1593	1595	63.6657	Sobic.001G173300.1	reversibly glycosylated polypeptide 2	N/A	N/A	N/A	K13379	Amino sugar and nucleotide sugar metabolism ;Glycosyltransferases	GO:0030244,GO:0016866	cellulose biosynthetic process;intramolecular transferase activity
c47095/f1p0/2186	2185	63.5628	Sobic.009G132900.3	pyruvate orthophosphate dikinase	N/A	N/A	N/A	K01006	Pyruvate metabolism ;Carbon fixation in photosynthetic organisms ;Carbon fixation pathways in prokaryotes	GO:0016772,GO:0016310,GO:0016301,GO:0005524,GO:0050242,GO:0006090	transferase activity, transferring phosphorus-containing groups;phosphorylation;kinase activity;ATP binding;pyruvate, phosphate dikinase activity;pyruvate metabolic process
c1789/f4p4/1424	1424	63.529	Sobic.003G034300.1	myb-like transcription factor family protein	N/A	N/A	N/A	N/A	N/A	N/A	N/A
c31089/f17p4/1133	1134	63.4742	Sobic.008G065000.1	Mog1/PsbP/DUF1795-like photosystem II reaction center PsbP family protein	N/A	N/A	N/A	N/A	N/A	GO:0019898,GO:0015979,GO:0009654,GO:0009523,GO:0005509	extrinsic component of membrane;photosynthesis;photosystem II oxygen evolving complex;photosystem II;calcium ion binding
c40403/f34p34/1085	1086	63.4715	Zm00008a015155_T01	light harvesting complex of photosystem II 5	N/A	N/A	N/A	K08916	Photosynthesis - antenna proteins ;Photosynthesis proteins	GO:0016020,GO:0009765	membrane;photosynthesis, light harvesting
c21409/f1p1/1547	1547	63.4316	Sobic.001G073700.1	Tubulin/FtsZ family protein	N/A	N/A	N/A	K07374	Messenger RNA Biogenesis ;Chromosome and associated proteins ;Exosome ;Phagosome ;Apoptosis ;Tight junction ;Gap junction ;Cytoskeleton proteins ;Pathogenic Escherichia coli infection	GO:0003924,GO:0007017,GO:0005874	GTPase activity;microtubule-based process;microtubule
c21048/f1p5/1114	1114	63.4274	Sobic.005G004500.1	ferritin 4	KOG2332	Ferritin	P	K00522	Exosome ;Ferroptosis ;Necroptosis ;Mineral absorption	GO:0008199,GO:0006879,GO:0006826	ferric iron binding;cellular iron ion homeostasis;iron ion transport
c21700/f1p3/1764	1764	63.4163	Sobic.001G154100.1	DNAJ homologue 2	KOG0712	Molecular chaperone (DnaJ superfamily)	O	K09503	Mitochondrial biogenesis ;Chaperones and folding catalysts ;Protein processing in endoplasmic reticulum	GO:0051082,GO:0031072	unfolded protein binding;heat shock protein binding
c19476/f2p2/1112	1113	63.4085	Sobic.002G291200.1	UDP-glucose pyrophosphorylase 2	N/A	N/A	N/A	K00963	Pentose and glucuronate interconversions ;Galactose metabolism ;Starch and sucrose metabolism ;Amino sugar and nucleotide sugar metabolism	GO:0070569,GO:0008152	uridylyltransferase activity;metabolic process
c14393/f2p1/1340	1341	63.369	GRMZM2G139041_T01	non-specific phospholipase C1	N/A	N/A	N/A	K01114	Inositol phosphate metabolism ;Glycerophospholipid metabolism ;Ether lipid metabolism ;Bacterial toxins ;Quorum sensing ;Thyroid hormone signaling pathway	GO:0016788	hydrolase activity, acting on ester bonds
c39648/f2p11/1114	1115	63.2869	Sobic.007G053500.2	Mob1/phocein family protein	KOG0440	Cell cycle-associated protein Mob1-1	D	K06685	Hippo signaling pathway ;Hippo signaling pathway -fly ;Hippo signaling pathway - multiple species ;Cell cycle - yeast	N/A	N/A
c11473/f2p6/1351	1352	63.2647	Sobic.009G217100.2	Sec14p-like phosphatidylinositol transfer family protein	KOG1471	Phosphatidylinositol transfer protein SEC14 and related proteins	I	N/A	N/A	N/A	N/A
c19733/f1p11/1936	1936	63.2584	Pavir.Ga01281.1	Adenosylmethionine decarboxylase family protein	KOG0788	S-adenosylmethionine decarboxylase	T	K01611	Cysteine and methionine metabolism ;Arginine and proline metabolism	GO:0008295,GO:0006597,GO:0004014	spermidine biosynthetic process;spermine biosynthetic process;adenosylmethionine decarboxylase activity
c10716/f2p2/1597	1597	63.1448	Sobic.002G036000.4	Aldolase-type TIM barrel family protein	N/A	N/A	N/A	K11517	Glyoxylate and dicarboxylate metabolism ;Peroxisome	GO:0016491	oxidoreductase activity
c8063/f1p1/2493	2496	63.1081	Sobic.010G160700.1	phosphoenolpyruvate carboxylase 2	N/A	N/A	N/A	K01595	Pyruvate metabolism ;Carbon fixation in photosynthetic organisms ;Carbon fixation pathways in prokaryotes ;Methane metabolism	GO:0015977,GO:0008964,GO:0006099	carbon fixation;phosphoenolpyruvate carboxylase activity;tricarboxylic acid cycle
c30691/f1p0/1094	1094	63.0657	Sobic.001G509300.1	Tetratricopeptide repeat (TPR)-like superfamily protein	N/A	N/A	N/A	N/A	N/A	N/A	N/A
c96/f28p50/1185	1185	63.0529	GRMZM2G010884_T01	photosystem I light harvesting complex gene 3	N/A	N/A	N/A	K08909	Photosynthesis - antenna proteins ;Photosynthesis proteins	GO:0016020,GO:0009765	membrane;photosynthesis, light harvesting
c34341/f28p7/1336	1336	63.0068	Sobic.007G171500.1	Cytochrome C1 family	KOG3052	Cytochrome c1	C	K00413	Oxidative phosphorylation ;Two-component system ;Cardiac muscle contraction ;Alzheimer's disease ;Parkinson's disease ;Huntington's disease ;Non-alcoholic fatty liver disease (NAFLD)	GO:0020037,GO:0009055	heme binding;electron carrier activity
c33797/f3p6/1253	1253	63.0031	Sobic.001G386200.1	atypical CYS HIS rich thioredoxin 4	KOG0907	Thioredoxin	O	N/A	N/A	GO:0045454,GO:0015035,GO:0006662	cell redox homeostasis;protein disulfide oxidoreductase activity;glycerol ether metabolic process
c5115/f13p2/1161	1162	62.9986	Sobic.004G330700.1	Polynucleotidyl transferase, ribonuclease H-like superfamily protein	KOG0304	mRNA deadenylase subunit	A	K12581	Messenger RNA Biogenesis ;RNA degradation	GO:0005634	nucleus
c15912/f1p3/1111	1111	62.9338	Sobic.007G047300.1	O-methyltransferase 1	KOG3178	Hydroxyindole-O-methyltransferase and related SAM-dependent methyltransferases	R	K05279	Flavone and flavonol biosynthesis	GO:0046983,GO:0008171	protein dimerization activity;O-methyltransferase activity
c8829/f1p1/944	938	62.837	Sobic.009G225600.1	2Fe-2S ferredoxin-like superfamily protein	N/A	N/A	N/A	N/A	N/A	GO:0051536,GO:0009055	iron-sulfur cluster binding;electron carrier activity
c19127/f2p4/1134	1135	62.8127	Sobic.003G308400.1	N/A	N/A	N/A	N/A	N/A	N/A	N/A	N/A
c29653/f1p0/996	996	62.7583	Sobic.004G055200.2	phosphoglycerate kinase	N/A	N/A	N/A	K00927	Glycolysis / Gluconeogenesis ;Carbon fixation in photosynthetic organisms ;Exosome	GO:0006096,GO:0004618	glycolytic process;phosphoglycerate kinase activity
c22018/f3p3/2281	2281	62.7221	Sobic.003G050400.2	phospholipase D alpha 1	N/A	N/A	N/A	K01115	Glycerophospholipid metabolism ;Ether lipid metabolism ;Membrane trafficking ;Ras signaling pathway ;Phospholipase D signaling pathway ;Sphingolipid signaling pathway ;cAMP signaling pathway ;Endocytosis ;Fc gamma R-mediated phagocytosis ;GnRH signaling pathway ;Glutamatergic synapse ;Choline metabolism in cancer	GO:0005515,GO:0003824	protein binding;catalytic activity
c39228/f1p0/826	826	62.641	GRMZM2G402092_T01	N/A	N/A	N/A	N/A	N/A	N/A	N/A	N/A
c38008/f1p0/583	583	62.6354	GRMZM5G890323_T01	N/A	N/A	N/A	N/A	N/A	N/A	N/A	N/A
c18502/f1p0/920	920	62.63	Sobic.004G182800.1	glutathione S-transferase (class zeta) 2	KOG0868	Glutathione S-transferase	O	K01800	Tyrosine metabolism ;Styrene degradation	GO:0005515	protein binding
c28804/f2p7/1482	1482	62.5579	Sobic.007G025400.4	glyceraldehyde-3-phosphate dehydrogenase C subunit 1	KOG0657	Glyceraldehyde 3-phosphate dehydrogenase	G	N/A	N/A	GO:0055114,GO:0016620	oxidation-reduction process;oxidoreductase activity, acting on the aldehyde or oxo group of donors, NAD or NADP as acceptor
c16887/f1p2/1165	1165	62.4956	Sobic.003G350700.1	heat shock protein 70	N/A	N/A	N/A	K03283	Protein phosphatase and associated proteins ;Spliceosome ;Spliceosome ;Ribosome biogenesis ;Mitochondrial biogenesis ;Chaperones and folding catalysts ;Protein processing in endoplasmic reticulum ;Membrane trafficking ;Proteasome ;MAPK signaling pathway ;Cell adhesion molecules and their ligands ;Endocytosis ;Exosome ;Antigen processing and presentation ;Estrogen signaling pathway ;Longevity regu…	N/A	N/A
c14238/f2p9/1184	1185	62.4905	Sobic.010G153900.3	spermidine synthase 3	KOG1562	Spermidine synthase	E	K00797	Cysteine and methionine metabolism ;Arginine and proline metabolism ;beta-Alanine metabolism ;Glutathione metabolism	N/A	N/A
c13507/f1p0/809	809	62.4517	Sobic.003G370000.1	Chlorophyll A-B binding family protein	N/A	N/A	N/A	K03542	Photosynthesis ;Photosynthesis proteins	N/A	N/A
c33769/f1p1/1319	1322	62.4226	Sobic.005G063000.1	NAD(P)-binding Rossmann-fold superfamily protein	KOG1208	Dehydrogenases with different specificities (related to short-chain alcohol dehydrogenases)	Q	N/A	N/A	N/A	N/A
c1529/f3p10/1679	1679	62.3998	Sobic.002G291200.1	UDP-glucose pyrophosphorylase 2	N/A	N/A	N/A	K00963	Pentose and glucuronate interconversions ;Galactose metabolism ;Starch and sucrose metabolism ;Amino sugar and nucleotide sugar metabolism	GO:0070569,GO:0008152	uridylyltransferase activity;metabolic process
c12404/f1p0/841	841	62.3998	Sobic.010G266000.1	N/A	N/A	N/A	N/A	N/A	N/A	N/A	N/A
c45099/f1p1/571	571	62.3299	Sobic.003G055300.1	photosystem II subunit X	N/A	N/A	N/A	N/A	N/A	GO:0016020,GO:0015979,GO:0009523	membrane;photosynthesis;photosystem II
c29360/f1p6/1218	1217	62.2849	Sobic.001G169900.1	N/A	N/A	N/A	N/A	N/A	N/A	N/A	N/A
c20347/f1p3/1227	1229	62.1683	Sobic.001G422100.1	Haloacid dehalogenase-like hydrolase (HAD) superfamily protein	KOG3109	Haloacid dehalogenase-like hydrolase	R	K07025	General function prediction only	N/A	N/A
c7851/f2p3/1604	1604	62.1315	Sobic.004G023900.1	isopropyl malate isomerase large subunit 1	N/A	N/A	N/A	K01703	C5-Branched dibasic acid metabolism ;Valine;Glucosinolate biosynthesis	GO:0008152	metabolic process
c39895/f11p12/1471	1471	62.129	Sobic.001G064500.1	DNAJ homologue 2	KOG0712	Molecular chaperone (DnaJ superfamily)	O	K09503	Mitochondrial biogenesis ;Chaperones and folding catalysts ;Protein processing in endoplasmic reticulum	GO:0051082,GO:0031072	unfolded protein binding;heat shock protein binding
c22568/f1p1/1047	1046	62.0816	Sobic.010G042100.1	N/A	KOG3214	Uncharacterized Zn ribbon-containing protein	S	N/A	N/A	N/A	N/A
c341/f47p43/2720	2720	62.0767	GRMZM5G833699_T01	heat shock protein 90.1	N/A	N/A	N/A	K04079	Protein phosphatase and associated proteins ;Mitochondrial biogenesis ;Chaperones and folding catalysts ;Protein processing in endoplasmic reticulum ;Membrane trafficking ;Proteasome ;PI3K-Akt signaling pathway ;Exosome ;Necroptosis ;NOD-like receptor signaling pathway ;Antigen processing and presentation ;Th17 cell differentiation ;IL-17 signaling pathway ;Estrogen signaling pathway ;Progesteron…	GO:0051082,GO:0006950,GO:0006457,GO:0005524	unfolded protein binding;response to stress;protein folding;ATP binding
c1062/f10p14/1499	1500	62.0385	Sobic.007G166300.1	lactate/malate dehydrogenase family protein	KOG1496	Malate dehydrogenase	C	K00051	Pyruvate metabolism ;Carbon fixation in photosynthetic organisms	GO:0055114,GO:0016491,GO:0016616,GO:0016615,GO:0006108	oxidation-reduction process;oxidoreductase activity;oxidoreductase activity, acting on the CH-OH group of donors, NAD or NADP as acceptor;malate dehydrogenase activity;malate metabolic process
c13169/f1p6/1763	1765	62.0029	Pavir.J04785.1	Tubulin/FtsZ family protein	N/A	N/A	N/A	K07374	Messenger RNA Biogenesis ;Chromosome and associated proteins ;Exosome ;Phagosome ;Apoptosis ;Tight junction ;Gap junction ;Cytoskeleton proteins ;Pathogenic Escherichia coli infection	GO:0003924,GO:0007017,GO:0005874	GTPase activity;microtubule-based process;microtubule
c9286/f1p4/1431	1431	61.9247	Sobic.009G054900.1	Ca2+-activated RelA/spot homolog	KOG1157	Predicted guanosine polyphosphate pyrophosphohydrolase/synthase	T	N/A	N/A	GO:0015969	guanosine tetraphosphate metabolic process
c19017/f2p8/2139	2139	61.8798	Sobic.009G245000.2	ADPGLC-PPase large subunit	KOG1322	GDP-mannose pyrophosphorylase/mannose-1-phosphate guanylyltransferase	M	K00975	Starch and sucrose metabolism ;Amino sugar and nucleotide sugar metabolism ;Biofilm formation - Escherichia coli	GO:0016779,GO:0009058	nucleotidyltransferase activity;biosynthetic process
c2285/f3p1/1260	1260	61.8355	Sobic.002G374600.1	fatty acid biosynthesis 1	N/A	N/A	N/A	K09458	Fatty acid biosynthesis ;Lipid biosynthesis proteins ;Biotin metabolism	N/A	N/A
c37105/f1p2/1063	1063	61.8174	Sobic.010G214000.1	CONSTANS-like 3	N/A	N/A	N/A	N/A	N/A	GO:0008270,GO:0005622,GO:0005515	zinc ion binding;intracellular;protein binding
c25958/f1p9/1037	1038	61.7906	Sobic.009G001500.1	cyclophilin 20-2	KOG0880	Peptidyl-prolyl cis-trans isomerase	O	K03768	Chaperones and folding catalysts	GO:0006457,GO:0003755,GO:0000413	protein folding;peptidyl-prolyl cis-trans isomerase activity;protein peptidyl-prolyl isomerization
c29501/f1p0/994	994	61.771	Sobic.009G034700.2	aspartic proteinase A1	KOG1339	Aspartyl protease	O	K08245	Peptidases	GO:0006629,GO:0006508,GO:0004190	lipid metabolic process;proteolysis;aspartic-type endopeptidase activity
c9736/f3p2/973	976	61.7664	Sobic.002G078400.1	Ras-related small GTP-binding family protein	KOG0070	GTP-binding ADP-ribosylation factor Arf1	U	K07937,K07977	Membrane trafficking ;Phospholipase D signaling pathway ;GTP-binding proteins ;Endocytosis ;Exosome ;Vibrio cholerae infection ;Legionellosis ;GTP-binding proteins	N/A	N/A
c40478/f2p0/1193	1195	61.7579	Sobic.010G160700.1	phosphoenolpyruvate carboxylase 2	N/A	N/A	N/A	K01595	Pyruvate metabolism ;Carbon fixation in photosynthetic organisms ;Carbon fixation pathways in prokaryotes ;Methane metabolism	GO:0015977,GO:0008964,GO:0006099	carbon fixation;phosphoenolpyruvate carboxylase activity;tricarboxylic acid cycle
c5116/f2p2/2599	2599	61.6152	Sobic.010G160700.1	phosphoenolpyruvate carboxylase 2	N/A	N/A	N/A	K01595	Pyruvate metabolism ;Carbon fixation in photosynthetic organisms ;Carbon fixation pathways in prokaryotes ;Methane metabolism	GO:0015977,GO:0008964,GO:0006099	carbon fixation;phosphoenolpyruvate carboxylase activity;tricarboxylic acid cycle
c30903/f1p2/3830	3834	61.5966	Sobic.010G160700.1	phosphoenolpyruvate carboxylase 2	N/A	N/A	N/A	K01595	Pyruvate metabolism ;Carbon fixation in photosynthetic organisms ;Carbon fixation pathways in prokaryotes ;Methane metabolism	GO:0015977,GO:0008964,GO:0006099	carbon fixation;phosphoenolpyruvate carboxylase activity;tricarboxylic acid cycle
c15497/f1p2/951	950	61.5873	Sobic.004G305800.2	N/A	N/A	N/A	N/A	N/A	N/A	N/A	N/A
c28489/f1p2/1016	1016	61.5871	Sobic.009G194500.2	N/A	N/A	N/A	N/A	N/A	N/A	N/A	N/A
c22674/f1p0/669	669	61.5678	GRMZM2G052869_T03	metallothionein 2A	N/A	N/A	N/A	N/A	N/A	GO:0046872	metal ion binding
c31096/f1p3/2017	2017	61.5672	Sobic.001G469600.1	polyol/monosaccharide transporter 5	KOG0254	Predicted transporter (major facilitator superfamily)	R	N/A	N/A	GO:0055085,GO:0022857,GO:0016021	transmembrane transport;transmembrane transporter activity;integral component of membrane
c22304/f1p0/558	556	61.5567	Sobic.002G414400.1	photosystem II subunit X	N/A	N/A	N/A	N/A	N/A	GO:0016020,GO:0015979,GO:0009523	membrane;photosynthesis;photosystem II
c467/f16p18/1522	1524	61.523	Sobic.002G047400.1	protein containing PDZ domain, a K-box domain, and a TPR region	N/A	N/A	N/A	N/A	N/A	N/A	N/A
c29052/f2p0/890	890	61.46	Sobic.004G130100.1	MMS ZWEI homologue 3	KOG0896	Ubiquitin-conjugating enzyme E2	O	K10704	DNA repair and recombination proteins ;Toll and Imd signaling pathway	N/A	N/A
c26939/f1p31/2248	2248	61.3863	Sobic.008G136000.1	heat shock protein 70	N/A	N/A	N/A	K03283	Protein phosphatase and associated proteins ;Spliceosome ;Spliceosome ;Ribosome biogenesis ;Mitochondrial biogenesis ;Chaperones and folding catalysts ;Protein processing in endoplasmic reticulum ;Membrane trafficking ;Proteasome ;MAPK signaling pathway ;Cell adhesion molecules and their ligands ;Endocytosis ;Exosome ;Antigen processing and presentation ;Estrogen signaling pathway ;Longevity regu…	N/A	N/A
c18007/f1p0/915	915	61.3288	Sobic.008G081900.2	CLPC homologue 1	N/A	N/A	N/A	K03696	Chaperones and folding catalysts	GO:0005515,GO:0016887,GO:0005524,GO:0019538	protein binding;ATPase activity;ATP binding;protein metabolic process
c12020/f2p5/1248	1248	61.3063	Sobic.001G504900.1	Pheophorbide a oxygenase family protein with Rieske [2Fe-2S] domain	N/A	N/A	N/A	K13071	Porphyrin and chlorophyll metabolism	GO:0055114,GO:0051537,GO:0016491,GO:0010277	oxidation-reduction process;2 iron, 2 sulfur cluster binding;oxidoreductase activity;chlorophyllide a oxygenase [overall] activity
c29186/f1p5/1930	1931	61.2554	Sobic.003G024400.1	CBL-interacting protein kinase 20	KOG0583	Serine/threonine protein kinase	T	N/A	N/A	GO:0007165	signal transduction
c10224/f2p5/1074	1076	61.2458	Sobic.009G212400.1	voltage dependent anion channel 3	KOG3126	Porin/voltage-dependent anion-selective channel protein	P	K15040	Mitochondrial biogenesis ;Transporters ;Calcium signaling pathway ;cGMP - PKG signaling pathway ;Ferroptosis ;Necroptosis ;Cellular senescence ;NOD-like receptor signaling pathway ;Cholesterol metabolism ;Parkinson's disease ;Huntington's disease ;HTLV-I infection	GO:0055085,GO:0005741	transmembrane transport;mitochondrial outer membrane
c32250/f1p0/1206	1207	61.2371	Sobic.009G032100.2	GLNB1 homolog	N/A	N/A	N/A	N/A	N/A	GO:0030234,GO:0006808	enzyme regulator activity;regulation of nitrogen utilization
c9922/f2p0/1385	1385	61.2168	Sobic.010G044900.1	GDSL-like Lipase/Acylhydrolase superfamily protein	N/A	N/A	N/A	N/A	N/A	GO:0016788	hydrolase activity, acting on ester bonds
c22334/f2p3/1083	1084	61.1963	Sobic.006G244800.2	jasmonate-zim-domain protein 12	N/A	N/A	N/A	K13464	Plant hormone signal transduction	N/A	N/A
c20806/f1p4/1099	1099	61.1151	Sobic.009G137200.2	Single-stranded nucleic acid binding R3H protein	KOG2953	mRNA-binding protein Encore	A	N/A	N/A	GO:0003676	nucleic acid binding
c34510/f1p1/842	843	61.1126	Sobic.003G249400.1	N/A	N/A	N/A	N/A	N/A	N/A	N/A	N/A
c5483/f1p2/1207	1207	61.0467	GRMZM2G449496_T01	plastid transcriptionally active 16	N/A	N/A	N/A	N/A	N/A	N/A	N/A
c993/f19p21/2216	2216	60.9675	Sobic.003G435800.1	Pheophorbide a oxygenase family protein with Rieske [2Fe-2S] domain	N/A	N/A	N/A	K13600	Porphyrin and chlorophyll metabolism	GO:0055114,GO:0010277,GO:0051537,GO:0016491	oxidation-reduction process;chlorophyllide a oxygenase [overall] activity;2 iron, 2 sulfur cluster binding;oxidoreductase activity
c6790/f1p1/1136	1136	60.8906	Sobic.010G255300.1	high chlorophyll fluorescence phenotype 173	KOG1203	Predicted dehydrogenase	G	N/A	N/A	N/A	N/A
c38883/f1p0/836	836	60.8307	Sobic.006G194300.1	Protein of unknown function (DUF581)	N/A	N/A	N/A	N/A	N/A	N/A	N/A
c39583/f2p1/1232	1232	60.7883	Sobic.002G030500.1	Reticulon family protein	KOG1792	Reticulon	U	N/A	N/A	N/A	N/A
c21452/f1p0/672	673	60.746	Sobic.002G159500.1	MMS ZWEI homologue 3	KOG0896	Ubiquitin-conjugating enzyme E2	O	K10704	DNA repair and recombination proteins ;Toll and Imd signaling pathway	N/A	N/A
c19957/f2p16/1086	1090	60.6565	Sobic.007G029400.1	Ribosomal protein L10 family protein	KOG0815	60S acidic ribosomal protein P0	J	K02941	Ribosome ;Ribosome	GO:0042254,GO:0005622	ribosome biogenesis;intracellular
c9742/f1p0/784	784	60.622	Sobic.003G400800.1	FK506-binding protein 15 kD-1	KOG0544	FKBP-type peptidyl-prolyl cis-trans isomerase	O	K09569	Chaperones and folding catalysts	GO:0006457	protein folding
c36434/f1p10/1212	1212	60.6219	Sobic.001G387600.1	Ethylene insensitive 3 family protein	N/A	N/A	N/A	K14514	Transcription factors ;MAPK signaling pathway - plant ;Plant hormone signal transduction	N/A	N/A
c38178/f1p4/1465	1465	60.6042	Sobic.007G025500.1	lysine histidine transporter 1	KOG1303	Amino acid transporters	E	N/A	N/A	GO:0003333	amino acid transmembrane transport
c26650/f1p8/1933	1933	60.579	Sobic.002G006600.1	glutamate:glyoxylate aminotransferase	N/A	N/A	N/A	K14272	Glyoxylate and dicarboxylate metabolism ;Carbon fixation in photosynthetic organisms ;Alanine;Glycine;Arginine biosynthesis ;Amino acid related enzymes	GO:0030170,GO:0009058	pyridoxal phosphate binding;biosynthetic process
c7715/f1p2/1145	1145	60.5542	Sobic.009G062400.1	SKP1/ASK-interacting protein 16	N/A	N/A	N/A	N/A	N/A	GO:0005515	protein binding
c39992/f53p46/1482	1485	60.5288	Sobic.010G005500.1	ferredoxin-NADP(+)-oxidoreductase 2	N/A	N/A	N/A	K02641	Photosynthesis ;Photosynthesis proteins	GO:0055114,GO:0016491	oxidation-reduction process;oxidoreductase activity
c39970/f13p7/1341	1341	60.4704	Sobic.002G374100.1	TIFY domain/Divergent CCT motif family protein	N/A	N/A	N/A	K13464	Plant hormone signal transduction	N/A	N/A
c18868/f2p6/1201	1201	60.4294	Sobic.001G244600.1	kinase interacting (KIP1-like) family protein	KOG0962,KOG4674	DNA repair protein RAD50, ABC-type ATPase/SMC superfamily;Uncharacterized conserved coiled-coil protein	L;S	N/A	N/A	N/A	N/A
c33222/f2p9/1248	1248	60.4151	Sobic.001G350700.1	Protein kinase superfamily protein	KOG0583	Serine/threonine protein kinase	T	K14498	Protein kinases ;MAPK signaling pathway - plant ;Plant hormone signal transduction	GO:0006468,GO:0005524,GO:0004672	protein phosphorylation;ATP binding;protein kinase activity
c31218/f1p0/1187	1187	60.4003	Sobic.006G069000.1	ferredoxin 3	N/A	N/A	N/A	K02639	Photosynthesis ;Photosynthesis proteins	GO:0051536,GO:0009055	iron-sulfur cluster binding;electron carrier activity
c23492/f1p23/2175	2175	60.3908	Sobic.004G268500.1	nine-cis-epoxycarotenoid dioxygenase 4	KOG1285	Beta, beta-carotene 15,15'-dioxygenase and related enzymes	Q	K09840	Carotenoid biosynthesis	N/A	N/A
c2288/f5p24/1257	1256	60.3847	Sobic.007G134000.4	general regulatory factor 7	KOG0841	Multifunctional chaperone (14-3-3 family)	O	K06630	DNA repair and recombination proteins ;MAPK signaling pathway - yeast ;Hippo signaling pathway ;Hippo signaling pathway -fly ;PI3K-Akt signaling pathway ;Exosome ;Cell cycle ;Oocyte meiosis ;Neurotrophin signaling pathway ;Viral carcinogenesis ;Epstein-Barr virus infection	GO:0019904	protein domain specific binding
c5695/f4p8/1454	1454	60.3821	Sobic.003G151600.1	S-adenosylmethionine synthetase family protein	N/A	N/A	N/A	K00789	Cysteine and methionine metabolism	GO:0006556,GO:0004478,GO:0005524	S-adenosylmethionine biosynthetic process;methionine adenosyltransferase activity;ATP binding
c17164/f1p4/1265	1265	60.3379	Sobic.009G195900.1	tubby like protein 7	KOG2502	Tub family proteins	R	N/A	N/A	GO:0005515	protein binding
c22429/f1p1/860	863	60.333	Sobic.004G309500.1	Protein of unknown function (DUF1685)	N/A	N/A	N/A	N/A	N/A	N/A	N/A
c31324/f1p4/1343	1343	60.2808	Sobic.006G191500.2	Pentatricopeptide repeat (PPR-like) superfamily protein	N/A	N/A	N/A	N/A	N/A	N/A	N/A
c30812/f1p1/1301	1301	60.2551	Sobic.008G033400.1	TRICHOME BIREFRINGENCE-LIKE 11	N/A	N/A	N/A	N/A	N/A	N/A	N/A
c36705/f1p5/974	974	60.1972	Sobic.004G030000.1	copper ion binding;cobalt ion binding;zinc ion binding	N/A	N/A	N/A	N/A	N/A	N/A	N/A
c24798/f2p3/987	990	60.1392	Sobic.001G404500.1	Thioredoxin superfamily protein	KOG3160	Gamma-interferon inducible lysosomal thiol reductase	O	K08059	Antigen processing and presentation	N/A	N/A
c31002/f1p1/1448	1448	60.0574	Sobic.009G028500.5	zinc finger (CCCH-type) family protein	KOG1595	CCCH-type Zn-finger protein	R	N/A	N/A	GO:0046872	metal ion binding
c32050/f1p1/560	560	59.965	Sobic.010G232100.2	polyubiquitin 10	KOG0005,KOG0001	Ubiquitin-like protein;Ubiquitin-like protein;Ubiquitin and ubiquitin-like proteins;Ubiquitin and ubiquitin-like proteins	O;D;O;R	K08770,K04551	Ubiquitin system ;PPAR signaling pathway ;Ubiquitin system ;Endocytosis ;Exosome ;Mitophagy - animal ;Parkinson's disease ;Kaposi's sarcoma-associated herpesvirus infection	N/A	N/A
c39991/f23p24/1738	1738	59.9605	Sobic.001G519800.1	glyceraldehyde-3-phosphate dehydrogenase B subunit	KOG0657	Glyceraldehyde 3-phosphate dehydrogenase	G	K05298	Carbon fixation in photosynthetic organisms	GO:0055114,GO:0016620	oxidation-reduction process;oxidoreductase activity, acting on the aldehyde or oxo group of donors, NAD or NADP as acceptor
c25610/f4p6/1351	1351	59.9466	Sobic.010G186400.1	Tetratricopeptide repeat (TPR)-like superfamily protein	N/A	N/A	N/A	N/A	N/A	N/A	N/A
c20870/f5p16/1251	1251	59.9366	Sobic.002G133800.1	monodehydroascorbate reductase 1	KOG1336	Monodehydroascorbate/ferredoxin reductase	R	K08232	Ascorbate and aldarate metabolism	GO:0055114,GO:0016491	oxidation-reduction process;oxidoreductase activity
c12297/f1p1/1098	1098	59.9072	Sobic.009G043000.1	thioredoxin F2	KOG0907	Thioredoxin	O	N/A	N/A	GO:0045454,GO:0015035,GO:0006662	cell redox homeostasis;protein disulfide oxidoreductase activity;glycerol ether metabolic process
c43425/f1p0/822	825	59.8966	Sobic.001G141300.1	cold, circadian rhythm, and RNA binding 1	N/A	N/A	N/A	N/A	N/A	GO:0003676	nucleic acid binding
c13573/f68p33/1147	1148	59.8951	Sobic.010G259100.2	Uncharacterised protein family (UPF0114)	N/A	N/A	N/A	N/A	N/A	N/A	N/A
c7225/f3p6/1178	1178	59.8832	Sobic.002G028700.1	succinate dehydrogenase 1-1	N/A	N/A	N/A	K00234	Citrate cycle (TCA cycle) ;Oxidative phosphorylation ;Alzheimer's disease ;Parkinson's disease ;Huntington's disease ;Non-alcoholic fatty liver disease (NAFLD)	GO:0055114,GO:0016491	oxidation-reduction process;oxidoreductase activity
c597/f7p6/1613	1616	59.8469	Sobic.001G425400.1	high cyclic electron flow 1	N/A	N/A	N/A	K03841	Glycolysis / Gluconeogenesis ;Pentose phosphate pathway ;Fructose and mannose metabolism ;Carbon fixation in photosynthetic organisms ;Methane metabolism ;AMPK signaling pathway ;Exosome ;Insulin signaling pathway	GO:0042578,GO:0042132,GO:0005975	phosphoric ester hydrolase activity;fructose 1,6-bisphosphate 1-phosphatase activity;carbohydrate metabolic process
c5277/f1p8/1806	1806	59.778	Sobic.006G161500.1	Translation elongation factor EFG/EF2 protein	N/A	N/A	N/A	K02355	Mitochondrial biogenesis ;Translation factors	GO:0005525	GTP binding
c19201/f1p1/806	806	59.7007	Sobic.001G428200.1	glycine-rich protein	N/A	N/A	N/A	N/A	N/A	N/A	N/A
c19131/f1p1/1098	1099	59.6988	GRMZM2G164318_T01	beta-hydroxylase 1	N/A	N/A	N/A	K15746	Carotenoid biosynthesis	GO:0055114,GO:0016491,GO:0006633,GO:0005506	oxidation-reduction process;oxidoreductase activity;fatty acid biosynthetic process;iron ion binding
c12726/f2p2/830	831	59.6892	Sobic.006G162200.1	subunit NDH-M of NAD(P)H:plastoquinone dehydrogenase complex	N/A	N/A	N/A	N/A	N/A	GO:0055114,GO:0016655	oxidation-reduction process;oxidoreductase activity, acting on NAD(P)H, quinone or similar compound as acceptor
c24732/f3p4/1316	1319	59.6887	Sobic.001G180200.1	Peroxisomal membrane 22 kDa (Mpv17/PMP22) family protein	KOG1944	Peroxisomal membrane protein MPV17 and related proteins	R	K13348	Peroxisome	GO:0016021	integral component of membrane
c10556/f6p12/1486	1487	59.6806	Sobic.001G439600.1	regulatory particle non-ATPase 10	KOG2884	26S proteasome regulatory complex, subunit RPN10/PSMD4	O	K03029	Proteasome ;Proteasome ;Epstein-Barr virus infection	GO:0008540,GO:0006511	proteasome regulatory particle, base subcomplex;ubiquitin-dependent protein catabolic process
c17494/f1p4/1062	1062	59.6567	Sobic.007G150100.2	RELA/SPOT homolog 3	N/A	N/A	N/A	N/A	N/A	GO:0015969	guanosine tetraphosphate metabolic process
c13789/f8p3/1117	1120	59.6532	Sobic.003G244200.1	vacuolar ATP synthase subunit E1	KOG1664	Vacuolar H+-ATPase V1 sector, subunit E	C	K02150	Oxidative phosphorylation ;mTOR signaling pathway ;Phagosome ;Collecting duct acid secretion ;Synaptic vesicle cycle ;Rheumatoid arthritis ;Vibrio cholerae infection ;Epithelial cell signaling in Helicobacter pylori infection	GO:0046961,GO:0033178,GO:0015991,GO:0016747	proton-transporting ATPase activity, rotational mechanism;proton-transporting two-sector ATPase complex, catalytic domain;ATP hydrolysis coupled proton transport;transferase activity, transferring acyl groups other than amino-acyl groups
c11556/f1p2/2589	2590	59.6502	Sobic.010G160700.1	phosphoenolpyruvate carboxylase 2	N/A	N/A	N/A	K01595	Pyruvate metabolism ;Carbon fixation in photosynthetic organisms ;Carbon fixation pathways in prokaryotes ;Methane metabolism	GO:0015977,GO:0008964,GO:0006099	carbon fixation;phosphoenolpyruvate carboxylase activity;tricarboxylic acid cycle
c12530/f1p3/3576	3578	59.6318	Sobic.010G160700.1	phosphoenolpyruvate carboxylase 2	N/A	N/A	N/A	K01595	Pyruvate metabolism ;Carbon fixation in photosynthetic organisms ;Carbon fixation pathways in prokaryotes ;Methane metabolism	GO:0015977,GO:0008964,GO:0006099	carbon fixation;phosphoenolpyruvate carboxylase activity;tricarboxylic acid cycle
c12034/f1p0/926	926	59.617	Sobic.008G128600.1	secretion-associated RAS super family 2	KOG0077	Vesicle coat complex COPII, GTPase subunit SAR1	U	K07953	Protein processing in endoplasmic reticulum ;Membrane trafficking ;GTP-binding proteins ;Legionellosis	GO:0007264,GO:0005525	small GTPase mediated signal transduction;GTP binding
c38249/f1p1/1501	1513	59.5546	Zm00008a015155_T01	light harvesting complex of photosystem II 5	N/A	N/A	N/A	K08916	Photosynthesis - antenna proteins ;Photosynthesis proteins	GO:0016020,GO:0009765	membrane;photosynthesis, light harvesting
c24777/f2p4/1268	1268	59.5426	Sobic.002G124700.1	plasma membrane intrinsic protein 2	KOG0223	Aquaporin (major intrinsic protein family)	G	K09872	Transporters	GO:0016020,GO:0006810,GO:0005215	membrane;transport;transporter activity
c1442/f8p3/1399	1399	59.5382	Zm00008a035986_T01	40s ribosomal protein SA B	KOG0830	40S ribosomal protein SA (P40)/Laminin receptor 1	J	K02998	Ribosome ;Ribosome	GO:0006412,GO:0005840,GO:0005622,GO:0003735,GO:0015935	translation;ribosome;intracellular;structural constituent of ribosome;small ribosomal subunit
c39595/f5p19/1220	1222	59.4854	Sobic.006G264201.1	light harvesting complex photosystem II subunit 6	N/A	N/A	N/A	K08917	Photosynthesis - antenna proteins ;Photosynthesis proteins	GO:0016020,GO:0009765	membrane;photosynthesis, light harvesting
c20788/f1p0/1296	1296	59.4557	Sobic.003G234400.4	beta carbonic anhydrase 4	KOG1578	Predicted carbonic anhydrase involved in protection against oxidative damage	P	K01673	Nitrogen metabolism	GO:0008270,GO:0004089	zinc ion binding;carbonate dehydratase activity
c36814/f1p0/1102	1102	59.4428	Sobic.002G275100.1	pseudo-response regulator 5	KOG1601	GATA-4/5/6 transcription factors	K	K12130	Circadian rhythm - plant	GO:0005515,GO:0000160	protein binding;phosphorelay signal transduction system
c36914/f1p2/1183	1183	59.433	Sobic.008G066100.1	chloroplast RNA binding	KOG1430,KOG1371	C-3 sterol dehydrogenase/3-beta-hydroxysteroid dehydrogenase and related dehydrogenases;C-3 sterol dehydrogenase/3-beta-hydroxysteroid dehydrogenase and related dehydrogenases;UDP-glucose 4-epimerase/UDP-sulfoquinovose synthase	E;I;M	N/A	N/A	GO:0050662,GO:0003824	coenzyme binding;catalytic activity
c32533/f1p0/685	686	59.4013	Sobic.002G226400.1	calmodulin-like 11	N/A	N/A	N/A	N/A	N/A	GO:0005509	calcium ion binding
c9916/f1p1/1080	1083	59.3006	Sobic.010G029400.1	N-terminal nucleophile aminohydrolases (Ntn hydrolases) superfamily protein	KOG0174	20S proteasome, regulatory subunit beta type PSMB6/PSMB9/PRE3	O	K02738	Peptidases ;Proteasome ;Proteasome	GO:0051603,GO:0005839,GO:0004298	proteolysis involved in cellular protein catabolic process;proteasome core complex;threonine-type endopeptidase activity
c17982/f1p0/1144	1140	59.2462	Pavir.Ba01491.1	N/A	N/A	N/A	N/A	N/A	N/A	N/A	N/A
c12563/f1p3/1096	1097	59.2303	Sobic.004G331700.2	aspartate aminotransferase 5	N/A	N/A	N/A	N/A	N/A	GO:0030170,GO:0009058,GO:0008483,GO:0006520	pyridoxal phosphate binding;biosynthetic process;transaminase activity;cellular amino acid metabolic process
c26045/f1p8/1279	1280	59.2182	Sobic.009G153000.1	actin 7	N/A	N/A	N/A	K10355	Cytoskeleton proteins	N/A	N/A
c8171/f1p5/1498	1498	59.181	Sobic.001G010100.1	ankyrin repeat-containing protein 2	KOG4214	Myotrophin and similar proteins	K	N/A	N/A	N/A	N/A
c30419/f1p3/1546	1546	59.171	Sobic.003G132100.1	dicarboxylate diiron protein, putative (Crd1)	N/A	N/A	N/A	K04035	Porphyrin and chlorophyll metabolism	GO:0055114,GO:0046872,GO:0016491	oxidation-reduction process;metal ion binding;oxidoreductase activity
c27835/f1p0/859	859	59.1572	Sobic.001G314500.1	sumo conjugation enzyme 1	KOG0424	Ubiquitin-protein ligase	O	K10577	RNA transport ;Messenger RNA Biogenesis ;Ubiquitin mediated proteolysis ;Ubiquitin system ;NF-kappa B signaling pathway ;MicroRNAs in cancer	N/A	N/A
c15577/f1p3/1226	1229	59.152	Sobic.004G320800.2	Chaperone DnaJ-domain superfamily protein	N/A	N/A	N/A	N/A	N/A	N/A	N/A
c33830/f5p26/1602	1602	59.1403	Sobic.002G136100.1	Haloacid dehalogenase-like hydrolase (HAD) superfamily protein	KOG2914	Predicted haloacid-halidohydrolase and related hydrolases	R	N/A	N/A	N/A	N/A
c22718/f1p0/664	663	59.1226	GRMZM2G369839_T01	N/A	N/A	N/A	N/A	N/A	N/A	N/A	N/A
c26810/f1p0/900	902	59.0838	Sobic.007G126200.1	mRNA splicing factor, thioredoxin-like U5 snRNP	KOG3414	Component of the U4/U6.U5 snRNP/mitosis protein DIM1;Component of the U4/U6.U5 snRNP/mitosis protein DIM1	A;D	K12859	Spliceosome ;Spliceosome	GO:0045454,GO:0005681,GO:0000398	cell redox homeostasis;spliceosomal complex;mRNA splicing, via spliceosome
c25380/f1p3/1338	1337	59.0695	Sobic.001G509300.1	Tetratricopeptide repeat (TPR)-like superfamily protein	N/A	N/A	N/A	N/A	N/A	N/A	N/A
c20445/f1p0/600	600	58.912	Sobic.006G221000.1	starch synthase 3	N/A	N/A	N/A	N/A	N/A	N/A	N/A
c17448/f1p14/1316	1316	58.9109	Sobic.004G272100.1	phosphoribulokinase	N/A	N/A	N/A	K00855	Carbon fixation in photosynthetic organisms	GO:0016301,GO:0008152,GO:0005524	kinase activity;metabolic process;ATP binding
c19956/f1p6/746	746	58.8852	Sobic.002G352100.1	photosystem I light harvesting complex gene 2	N/A	N/A	N/A	K08908	Photosynthesis - antenna proteins ;Photosynthesis proteins	GO:0016020,GO:0009765	membrane;photosynthesis, light harvesting
c15619/f1p0/571	570	58.8683	Sobic.002G369000.1	N/A	N/A	N/A	N/A	N/A	N/A	N/A	N/A
c27144/f1p14/1773	1773	58.8563	Sobic.010G239500.6	polyubiquitin 10	KOG0005,KOG0001	Ubiquitin-like protein;Ubiquitin-like protein;Ubiquitin and ubiquitin-like proteins;Ubiquitin and ubiquitin-like proteins	O;D;O;R	K08770	Ubiquitin system ;PPAR signaling pathway	N/A	N/A
c30324/f1p0/840	848	58.8548	Sobic.009G233300.1	Ribosomal protein L18ae family	N/A	N/A	N/A	N/A	N/A	N/A	N/A
c16151/f1p3/1042	1041	58.8355	Sobic.002G061900.1	FKBP-like peptidyl-prolyl cis-trans isomerase family protein	KOG0544	FKBP-type peptidyl-prolyl cis-trans isomerase	O	N/A	N/A	GO:0006457	protein folding
c7948/f3p0/1839	1840	58.7894	LOC_Os09g01000.1	N/A	N/A	N/A	N/A	N/A	N/A	N/A	N/A
c39705/f11p13/1650	1651	58.7855	Sobic.009G004100.1	P-loop containing nucleoside triphosphate hydrolases superfamily protein	KOG2878	Predicted kinase	R	K15918	Glyoxylate and dicarboxylate metabolism ;Glycerolipid metabolism ;Glycine	N/A	N/A
c23531/f2p2/2137	2137	58.7735	Sobic.002G329400.1	beta-amylase 5	N/A	N/A	N/A	N/A	N/A	GO:0016161,GO:0000272	beta-amylase activity;polysaccharide catabolic process
c11766/f1p1/815	816	58.6709	Sobic.003G433900.1	NAD(P)H:plastoquinone dehydrogenase complex subunit O	N/A	N/A	N/A	N/A	N/A	GO:0055114,GO:0016655,GO:0005886	oxidation-reduction process;oxidoreductase activity, acting on NAD(P)H, quinone or similar compound as acceptor;plasma membrane
[truncated: 290 more rows]
